# Supplementary material
Source: PubMed Central journal article supplement (PMC9038683)
Supplement: NIHMS1777955-supplement-1.pdf [file NIHMS1777955-supplement-1.pdf]

## **Supplementary Materials and Methods**

### **Human tissue samples**

All de-identified gastric cancer (GC) tissues were obtained from Fujian Medical University Union Hospital (FJMUUH, Fuzhou, China) from February 2012 to December 2015. The institutional review committee has approved all experimental protocols using de-identified human specimens of FJMUUH. The informed consent was obtained from subjects in this experiment. The study complied with the principles outlined in the Declaration of Helsinki. We constructed 3 tissue microarrays (TMA) from 365 cases of tumor tissues and one TMA from 124 cases of adjacent non-tumor gastric tissues (Supplementary Table 8). The clinical and pathological information and follow up information are available for the majority of these cases. We also collected GC tumor tissues and adjacent non-tumor gastric tissues from 36 GC patients with complete clinicopathological features for whole-transcriptome sequencing (Local dataset1, Supplementary Table 1).

### **Cell culture and reagents**

Human gastric cancer cell line AGS was obtained from American Tissue Culture Collection (ATCC, Manassas, VA) and cultured in Ham's F-12 Nutrient Mixture (GIBCO, Carlsbad, CA) containing 10% fetal bovine serum (Invitrogen Life Technologies, Carlsbad, CA) and 1% penicillin/streptomycin (GIBCO). Human gastric cancer cell lines SNU-1 were obtained from ATCC (Manassas, VA). Human gastric cancer cell lines MKN28 and MKN45 cells was obtained from the Riken Cell Bank (Tsukuba, Japan) and STKM2 was a generous gift from Dr. Alexander Zaika, University of Miami. SNU-1, MKN28, MKN45 and STKM2 were maintained in RPMI/1640 medium with 10% fetal bovine serum and 1% penicillin/streptomycin. All these cell lines were maintained at 37 °C in a humidified incubator with 5% CO<sub>2</sub>. Mycoplasma infection was routinely tested once a month. All reagents and antibodies used in the study were listed in Key Resources Table.

### **TFF1-knockout mouse tissue samples**

TFF1-knockout (KO) mouse model of gastric tumorigenesis<sup>1, 2</sup> and normal wild-type (WT) mice were maintained in a pathogen-free state following animal care committee approved protocol of the University of Miami. We collected 10 cases of TFF1-knockout mouse tissues (Histopathological diagnosis as low-grade dysplasia) with (5 cases) and without (5 cases) *H. pylori* infection (PMSS1 strain,

1 month infection) for a second whole-transcriptome sequencing (Local dataset2). Formalin fixed paraffin-embedded and frozen gastric tissues were collected from WT mice or TFF1-KO mice. Totally, 9 samples of WT mice and 31 samples of TFF1-KO mice, including 15 cases of low-grade dysplasia (LGD), 8 cases of High-grade dysplasia (HGD), and 8 cases of cancer, were enrolled in the study. The pathologists performed hematoxylin and eosin (H&E) staining to confirm pathological diagnosis and grading of the stomach tissues.

### **Whole-transcriptome sequencing**

All tissues for whole-transcriptome sequencing were lysed with Trizol (Invitrogen), and RNA sequencing from Local dataset1 were performed by Kangchen Biotechnology Co., Ltd. (Shanghai, China) using TruSeq SR Cluster Kit v3-cBot-Hs (#GD-401-3001, Illumina) in Illumina HiSeq4000. The clinicopathological characteristics of these sequenced patients were listed in Supplemental Table 1. 10 mice stomach samples from Local dataset2 were extracted as described<sup>3</sup>. A total of 1 µg RNA from each sample was analyzed using the Illumina HiSeq 2500 platform. The Illumina (San Diego, CA) Tru-seq RNA sample prep kit was used for library preparation.

### **Gene expression data analysis**

To analyze the expression of RASAL2 in gastric cancer, we utilized the TCGA pan-cancer dataset from NCI (<https://portal.gdc.cancer.gov/>), a series of gastric cancer datasets with unpaired adjacent non-cancer tissues (GSE27342, GSE66229, GSE63288, GSE19826, GSE79973, GSE81948, GSE51575, GSE33335, GSE63089, GSE103236, GSE112369, GSE40634, GSE45956, and GSE13873) and several paired gastric cancer datasets (GSE122401, GSE65801, and GSE13195) from GEO Datasets (<https://www.ncbi.nlm.nih.gov/gds/>). To execute the background adjustment for the raw data of the datasets from Affymetrix®, the “Affy” package in R language was used in Robust Multichip Analysis (RMA) algorithm<sup>4</sup>. The “lumi” package was used in the raw data of the datasets from Illumina®<sup>5</sup>. The “ComBat” algorithm<sup>6</sup> was applied to reduce the likelihood of batch effects from non-biological technical biases. When a gene has multiple probes, the mean value of probes was used as the gene expression. All data were analyzed using R software (R 3.6.1; <https://www.r-project.org/>).

### **Gene set enrichment analysis**

To analyze the *RASAL2*-associated signaling pathways, the patients were divided into three groups (high, median, and low) by Mean  $\pm$  SD of *RASAL2* expression. The differential expressed genes between *RASAL2*-high and -low groups were identified by using the “limma” package. Normalization Enrichment Score (NES) and the false discovery rate (FDR) of each gene set were calculated using the “clusterProfiler” (v3.12.0) package<sup>7</sup>. The reference gene sets, including hallmark gene sets, GO biological processes gene sets, and transcription factor targets gene sets, were downloaded from Gene Set Enrichment Analysis (GSEA) (<https://www.gsea-msigdb.org/>). Each gene set was considered significant when the FDR was less than 25%.

### **Immunofluorescence staining**

Immunofluorescence stainings<sup>8</sup> were performed as described previously. Briefly, paraffin-embedded tissues were deparaffinized in Histo-Clear (National Diagnostics, Atlanta, GA) and Histo-Clear was removed in gradient ethanol. Next, the citric acid buffer was used for antigen retrieval. 5% fetal bovine serum albumin (BSA, Sigma-Aldrich) was used as blocking reagents. They were fixed with 4% paraformaldehyde for cell sides, permeabilized with 0.5% Triton X-100, and then blocked with 5% BSA. The primary antibody (Key Resources Table) was incubated overnight at 4 °C. After washing 3 times with PBS, slides were incubated with 1: 400 Alexa Fluor-488 or Alexa Fluor-594 (Thermo Fisher, Weston, FL) secondary antibody for 1 hour in the dark. Finally, the nuclei were stained with DAPI (Vector Laboratories, Burlingame, CA). All-in-one Fluorescence Microscope (BZ-X700, Keyence Corp, Atlanta, GA) was used to acquire images.

### **Immunohistochemistry staining**

Immunohistochemistry (IHC) stainings<sup>9</sup> were performed as described previously. Briefly, paraffin-embedded tissues were deparaffinized in Histo-Clear (National Diagnostics, Atlanta, GA) and Histo-Clear was removed in gradient ethanol. Next, the citric acid buffer was used for antigen retrieval. 3% hydrogen peroxide following 5% BSA were used as blocking reagents. The primary antibody (Key Resources Table) was incubated overnight at 4 °C. After washing 3 times with PBS, slides were incubated with horseradish peroxidase (HRP)-conjugated streptavidin for 20 min at room temperature. Finally, the nuclei were stained with Hematoxylin (Maixin Biotech Co., Ltd, Fuzhou, China). Olympus FSX100 microscope (Olympus, Japan) was used to acquire images.

The scoring criteria for immunohistochemistry were described as previously<sup>9</sup>. Briefly, five fields were randomly selected to assess the intensity and percentage of positive cells in each slice. The intensity of tumor staining was defined as 0 (no staining), 1 (weak staining, light yellow), 2 (medium staining, yellow to brown) or 3 (strong staining, brown), and the proportion of positive tumor staining was classified as 0 ( $\leq 5\%$  positive cells), 1 (6% -25% positive cells), 2 (26% -50% positive cells), or 3 ( $\geq 51\%$  positive cells). The final score of one slide was expressed as the formula: the intensity score  $\times$  the proportion score (from 0 to 9 totally). Patients were defined as an expression-positive group unless their final score is 0.

### **Cell viability assay**

The cells were seeded in 96-well plates at 1000 cells / well. The cell viability was measured in the designated time points using the CellTiter-Glo Luminescent Cell Viability kit (Promega, Madison, WI) at luminescence microplate reader (BMG Labtech) according to the manufacturer's instructions.

### **Transfection of DNA plasmids and siRNA**

Polyjet and LipoJet reagents were used for DNA and siRNA transfection, respectively, following the manufacturer's instruction (Signagen Laboratories, Frederick, MD). The transient transfection of the indicated doses of pCMV4-p65 plasmid (purchased from Addgene)<sup>10</sup> or pLV-RASAL2 (purchased from Vectorbuilder, Chicago, IL) was performed in 6-well plates. The cells were collected 48h for plasmids or 72h for siRNA after transfection. More details of DNA plasmids are listed in Key Resources Table. The siRNA sequences were listed in Key Resources Table.

### **Generation of lentivirus with shRASAL2 constructs**

The control shRNA and shRASAL2 lentiviral plasmids were purchased from the Vector Builder (Guangzhou, China) (<https://en.vectorbuilder.com/>) (the target sequences were showed in Key Resources Table). The control shRNA or shRASAL2 lentiviral plasmid, and 2nd Generation lentivirus packaging system (LV003, Abmgood) were co-transfected into HEK293T cells using polyjet transfection reagent (SignaGen Laboratories). After 72h transfection, supernatants, containing lentivirus, were collected and stored at  $-80^{\circ}\text{C}$ .

### **Establishment of RASAL2 knockdown stable cell lines**

To establish stable knockdown clones, MKN28 and MKN45 were infected with the lentivirus (control shRNA or shRASAL2) in 8 ug/ml of polybrene (TR-1003, Sigma-Aldrich). After 72h infection, the cells were treated with puromycin for two weeks to select stable knockdown of RASAL cells and examined by Western blotting.

### **Chromatin immunoprecipitation (ChIP)**

ChIP analysis was performed using ChIP-IT Express Enzymatic and ChIP-IT High Sensitivity kit (Active Motif Inc, Carlsbad, CA) according to the manufacturer's instructions. Briefly, 48 hours after transfection of the NF- $\kappa$ B plasmid, or 6 hours after infection with *H. pylori*, GC cells were fixed with 1% formaldehyde (Sigma-Aldrich) for 10 minutes at room temperature, and then stop the fixation reaction by adding Glycine Stop-Fix Solution. The cell lysates were collected for DNA shearing enzyme incubation at 37°C for 10 minutes and shaken every 2 minutes to produce approximately 50-150 bp DNA fragments. The same amount of cell lysates were mixed with prebound antibody (NF- $\kappa$ B) in protein G magnetic beads and spun at 4 ° C overnight, followed by eluting the protein / DNA complex and purifying the DNA. Quantitative real-time PCR was used to analyze the binding of NF- $\kappa$ B to the promoter of a RASAL2 target gene. Primers for ChIP qRT-PCR were provided in Key Resources Table.

### **PP2A immunoprecipitation phosphatase assay**

The non-radioactive Immunoprecipitation malachite green phosphatase assay kit (Millipore, Billerica, MA) was performed to measure PP2A activity. Briefly, cell lysates were harvested by lysis buffer (20 mmol / L imidazole-HCl, 2 mmol / L EDTA, 2 mmol / L EGTA, pH 7.0 with 10  $\mu$ g / mL each of aprotinin leupeptin, pepstatin, 1 mmol / L benzamidine, and 1 mmol / L PMSF with no phosphatase inhibitors) to extract total cell protein. All steps were conducted following the manufacturer's instructions, and the absorbance at 650 nm was measured by using luminescence microplate reader (BMG Labtech).

### **Western blotting**

Western blotting was performed as described previously<sup>3</sup>. Briefly, RIPA buffer with protease inhibitors and phosphatase inhibitors (Santa Cruz Biotechnology, Dallas, TX) was used to lysate cells or liquid nitrogen-frozen tissues. The protein concentration was measured using the Bio-Rad protein assay

(Bio-Rad Laboratories, Hercules, CA). The same amount of proteins was run SDS / PAGE and transferred to nitrocellulose membrane (PerkinElmer, Waltham, MA). After blocking with 5% fetal bovine serum albumin (BSA, Sigma-Aldrich), the membrane was incubated with a specific primary antibody at 4 ° C overnight with shaking following with washing 3 times with TBST buffer for total 30 minutes. The membrane was incubated with anti-rabbit or anti-mouse secondary antibodies for two hours at room temperature and then washed three times with TBS-T for 30 minutes. Chemiluminescent reagents (Millipore, Billerica, MA) and Molecular Imager (Bio-Rad Laboratories, Hercules, CA) were used to detect protein bands.

### **Immunoprecipitation**

Immunoprecipitation (IP) assay was used to detect the interaction between proteins. Cell lysates were collected in the lysis buffer (50 mM Tris-HCl (pH 7.4), 150 mM NaCl, 0.5% Triton X-100, 5 mM EDTA, 1x Protease inhibitors), then shaken with Protein G magnetic beads bound with the antibody at 4 ° C overnight. The immunoprecipitated complex was washed six times with PBS and boiled for ten minutes to elute the interacting complex from the beads and then subjected to SDS-PAGE for Western blotting.

### **Proximity ligation assay**

Duolink in situ proximity ligation assay (PLA) detection kit (Sigma-Aldrich) was used to detect physical proximity between RASAL2 and PP2Aa, following the guidelines from the manufacturer as previously described<sup>8</sup>. In brief, cells were cultured in 8-well chamber slides following fixation with 4% paraformaldehyde buffer, permeabilization with 0.5% Triton X-100 buffer, blocking with goat serum, and incubation overnight at 4°C with two primary antibodies (Mouse RASAL2 antibody, and Rabbit PP2Aa antibody, Key Resources Table) derived from different host species. After rinsing away nonspecific binding antibodies, we performed the following steps according to the supplier's protocol, including hybridizations, ligations, detection, and slide sealing steps, and then imaged by All-in-one Fluorescence Microscope (BZ-X700, Keyence Corp, Atlanta, GA).

### **Quantitative real-time PCR (qRT-PCR)**

Total RNA was extracted using Trizol (Invitrogen) according to the manufacturer's instructions.

Subsequently, an Advantage RT-for-PCR kit (Clontech Laboratories Inc) was used for cDNA synthesis. The public database PrimerBank (<https://pga.mgh.harvard.edu/primerbank/>) was used to obtain gene-specific primers (Key Resources Table), each pair of primers spanning 2 different exons and 1 intron. ICycler (Bio-Rad Laboratories, Hercules, CA) was used to perform qPCR to measure mRNA levels. Each sample was set triplicates and the readings of the threshold cycle number were averaged and normalized to HPRT (human) or 18S (mouse) of the same samples as described previously<sup>2</sup>.

### **Luciferase reporter assay**

The luciferase report assay was performed as previously described<sup>2</sup>. The luciferase reporter plasmids (shown in Key Resources Table) were transfected into gastric cancer cells. The pSV- $\beta$ -galactosidase plasmid was co-transfected with luciferase plasmids at each transfection to standardize transfection efficiency by normalizing readings to the  $\beta$ -Gal readout. Luciferase activity and  $\beta$ -galactosidase activity were measured after 48 hours of incubation. The results were expressed as relative luciferase activity: firefly luciferase activity divided by  $\beta$ -galactosidase activity. The experiments were performed in triplicate.

### **Tumor spheroid culture**

MKN45 or MKN28 control and RASAL2 knockdown stable cells were seeded into ultra-low attachment 6-well dishes (Corning, USA) and cultured in serum-free DMEM/F12 supplemented with 20 ng/ml epidermal growth factor (EGF), 10 ng/ml basic fibroblast growth factor (bFGF), 2% B-27 (Life Technologies, Carlsbad, CA, USA), and 2 mM L-glutamine (Life Technologies, Carlsbad, CA, USA). Cells were incubated in a 5% CO<sub>2</sub> chamber at 37°C for seven days. The culture medium was changed every three days. The diameter and number of tumor spheres in three random 100x magnification fields were calculated under All-in-one Fluorescence Microscope (BZ-X700, Keyence Corp, Atlanta, GA) in the bright light model.

### **Human gastric cancer organoid culture**

Human gastric cancer organoids culture was performed following our and other groups previous studies<sup>3, 11</sup>. Briefly, tumor tissue from the antrum of the stomach was collected and cut into 2-3 mm pieces following by digestion with 2.5mg/ml Collagenase A (Sigma) for 30 minutes. 5 ml dissociation

buffer, including D-sorbitol (Sigma) and Sucrose (Sigma), was added to the tissue and shaken for 2 minutes. The final supernatant was passed through a 70 µm filter and crypts fraction was centrifuged at 150g for 5 minutes. After washing by ice-cold PBS, the gland pellet was resuspended in Matrigel™ (Trevigen) supplemented with the growth factors as described<sup>3</sup>. Finally, 50 µl Matrigel™ suspension was carefully ejected into the center of each well of 24-well plate, following by adding 0.5 ml of the IntestiCult Organoid Growth Medium (STEMCELL Technologies, Cambridge, MA). The organoids were cultured in 5% CO<sub>2</sub> incubator at 37°C and changed media twice a week. Organoids from the second passage were infected by lentivirus with control or RASAL2 knockdown plasmid in 15 ml tubes overnight. The diameter and number of organoids in three random 100x magnification fields were measured under a light microscope seven days after infection.

#### **Nuclear and cytoplasmic protein extraction assay**

Nuclear and cytoplasmic protein extraction was performed according to the manufacturer's instruction (Cat: 78833, Thermo Scientific™). In brief, cells were harvested with trypsin-EDTA and then centrifuged. Ice-cold CER I and then CER II were added to the cell pellet for cytoplasmic protein extraction. The insoluble (pellet) fraction which contained nuclei was suspended and incubated in ice-cold NER for nuclear protein extraction. Stored extracts at -80°C until use.

#### ***In vitro* limiting dilution assay**

*In vitro* limiting dilution assay (LDA) was performed using U-bottom 96-well plate. MKN45 RASAL2-knockdown or control cells were diluted into three groups with different cell concentrations (1, 10, 100 cells/well). After 3 weeks of incubation, the number of wells with spheres was calculated. The frequency of spheroid formation was calculated using Extreme Limiting Dilution Analysis (<http://bioinf.wehi.edu.au/software/elda/>) at 21 days post incubation.

#### ***In vivo* xenograft mice model**

MKN45 RASAL2-knockdown or control cells were suspended in RPIM1640 medium/matrigel mixture (50% medium and 50% matrigel). 3×10<sup>6</sup> cells were injected subcutaneously into the flank regions of NOD/SCID mice (#001303, the Jackson Laboratory, USA). After 1 week of inoculation, mice were randomly assigned into four groups (n = 6 tumor per group): (a) vehicle (CTRL); (b) CDDP treatment



(CTRL+CDDP); (c) RASAL2 knockdown (shRASAL2); (d) combination of CDDP treatment and RASAL2 knockdown (shRASAL2+CDDP). The mice were administered with solution or cisplatin (CDDP, 2 mg/kg/3 days, ip). Tumor xenografts were measured twice a week, and tumor volume (TV) was calculated as the following formula:  $TV = (\text{length} \times \text{width}^2) / 2$ . The CDDP induced tumor inhibition rate was calculated at a time of sacrifice as the following formula:  $(TV1 - TV2) / TV1$ . TV1: the average TV of the CTRL group, TV2: the average TV of the CDDP group.

### Statistical analysis and survival analysis

Data were shown as mean  $\pm$  standard deviation (SD) of three independent experiments. A one-way ANOVA Newman-Keuls, multiple comparisons test, was performed to compare the statistical significance among 3 groups or more. A Student's t-test was used to compare the difference between 2 groups. Pearson's correlation was conducted to test the correlation between 2 continuous variables, and spearman's correlation was conducted for categorical variables. For survival analysis, we collected several gastric cancer datasets containing follow-up from TCGA and GEO Datasets (including GSE66229, GSE15459, and GSE26253). Recurrence-free survival (RFS) and overall survival (OS) were analyzed using the Kaplan-Meier method and evaluated by the log-rank test. Multivariable Cox proportional hazards model was employed to identify independent prognostic factors associated with OS in the local and GSE66229 cohorts. To determine the optimal cutoff of RASAL2 mRNA value, the function "surv\_cutpoint" in "survival" package of R software was performed, and values above or below the cutoff were defined as "High" or "Low", respectively. Differences with  $P \leq .05$  were considered to be significant.

### References

1. Lefebvre O, Chenard MP, Masson R, et al. Gastric mucosa abnormalities and tumorigenesis in mice lacking the pS2 trefoil protein. *Science* 1996;274:259-62.
2. Soutto M, Peng D, Katsha A, et al. Activation of beta-catenin signalling by TFF1 loss promotes cell proliferation and gastric tumorigenesis. *Gut* 2015;64:1028-39.
3. Chen Z, Li Z, Soutto M, et al. Integrated Analysis of Mouse and Human Gastric Neoplasms Identifies Conserved microRNA Networks in Gastric Carcinogenesis. *Gastroenterology* 2019;156:1127-1139 e8.
4. Gautier L, Cope L, Bolstad BM, et al. affy--analysis of Affymetrix GeneChip data at the probe level. *Bioinformatics* 2004;20:307-15.
5. Du P, Kibbe WA, Lin SM. lumi: a pipeline for processing Illumina microarray. *Bioinformatics* 2008;24:1547-8.
6. Johnson WE, Li C, Rabinovic A. Adjusting batch effects in microarray expression data using empirical Bayes

methods. *Biostatistics* 2007;8:118-27.

7. Yu G, Wang LG, Han Y, et al. clusterProfiler: an R package for comparing biological themes among gene clusters. *OMICS* 2012;16:284-7.
8. Lu H, Bhat AA, Peng D, et al. APE1 Upregulates MMP-14 via Redox-Sensitive ARF6-Mediated Recycling to Promote Cell Invasion of Esophageal Adenocarcinoma. *Cancer Res* 2019;79:4426-4438.
9. Wang JB, Li P, Liu XL, et al. An immune checkpoint score system for prognostic evaluation and adjuvant chemotherapy selection in gastric cancer. *Nat Commun* 2020;11:6352.
10. Ballard DW, Dixon EP, Peffer NJ, et al. The 65-kDa subunit of human NF-kappa B functions as a potent transcriptional activator and a target for v-Rel-mediated repression. *Proc Natl Acad Sci U S A* 1992;89:1875-9.
11. Mahe MM, Aihara E, Schumacher MA, et al. Establishment of Gastrointestinal Epithelial Organoids. *Curr Protoc Mouse Biol* 2013;3:217-40.

**Table S1. Characteristics of 36 patients with gastric cancer in Local dataset1**

| Number | Patient ID | Age | Sex    | Histopathological diagnosis | Tumor site | T stage | N stage | M stage | AJCC stage |
|--------|------------|-----|--------|-----------------------------|------------|---------|---------|---------|------------|
| 1      | NXH        | 70  | Male   | Adenocarcinoma              | Cardia     | T3      | N0      | M0      | IIA        |
| 2      | ZYM        | 60  | Female | Adenocarcinoma              | Mixed      | T4a     | N2      | M0      | IIIB       |
| 3      | WCH        | 65  | Male   | Adenocarcinoma              | Antrum     | T4a     | N3b     | M0      | IIIC       |
| 4      | ZAJ        | 72  | Female | Adenocarcinoma              | Body       | T4a     | N3b     | M0      | IIIC       |
| 5      | CCQ        | 74  | Male   | Adenocarcinoma              | Cardia     | T3      | N1      | M0      | IIB        |
| 6      | FZJ        | 64  | Male   | Adenocarcinoma              | Cardia     | T3      | N2      | M0      | IIIA       |
| 7      | LYH        | 73  | Male   | Adenocarcinoma              | Cardia     | T3      | N1      | M0      | IIB        |
| 8      | CMS        | 61  | Male   | Adenocarcinoma              | Cardia     | T3      | N3b     | M0      | IIIB       |
| 9      | LSX        | 74  | Male   | Adenocarcinoma              | Cardia     | T1      | N0      | M0      | IA         |
| 10     | CWT        | 70  | Male   | Adenocarcinoma              | Cardia     | T1      | N0      | M0      | IA         |
| 11     | LJH        | 51  | Male   | Adenocarcinoma              | Antrum     | T4a     | N3b     | M0      | IIIC       |
| 12     | ZMF        | 71  | Male   | Adenocarcinoma              | Antrum     | T4a     | N2      | M0      | IIIB       |
| 13     | LYQ        | 66  | Male   | Adenocarcinoma              | Cardia     | T3      | N2      | M0      | IIIA       |
| 14     | LYJ        | 70  | Female | Adenocarcinoma              | Cardia     | T3      | N2      | M0      | IIIA       |
| 15     | YTF        | 79  | Male   | Adenocarcinoma              | Cardia     | T3      | N2      | M0      | IIIA       |
| 16     | QLZ        | 73  | Female | Adenocarcinoma              | Body       | T2      | N2      | M0      | IIB        |
| 17     | XHY        | 55  | Female | Adenocarcinoma              | Body       | T3      | N3b     | M0      | IIIB       |
| 18     | LHG        | 54  | Male   | Adenocarcinoma              | Antrum     | T4a     | N2      | M0      | IIIB       |
| 19     | ZDL        | 44  | Male   | Adenocarcinoma              | Antrum     | T3      | N2      | M0      | IIIA       |
| 20     | CBJ        | 72  | Male   | Adenocarcinoma              | Body       | T3      | N3a     | M0      | IIIB       |
| 21     | LYB        | 65  | Male   | Adenocarcinoma              | Cardia     | T3      | N2      | M0      | IIIA       |
| 22     | LDC        | 52  | Male   | Adenocarcinoma              | Cardia     | T3      | N0      | M0      | IIA        |
| 23     | LYH        | 69  | Female | Adenocarcinoma              | Antrum     | T2      | N0      | M0      | IB         |
| 24     | YJF        | 66  | Male   | Adenocarcinoma              | Cardia     | T4a     | N3b     | M0      | IIIC       |
| 25     | PSQ        | 57  | Male   | Adenocarcinoma              | Antrum     | T3      | N3b     | M0      | IIIB       |
| 26     | LYG        | 67  | Male   | Adenocarcinoma              | Body       | T4a     | N3b     | M0      | IIIC       |
| 27     | GXT        | 67  | Male   | Adenocarcinoma              | Cardia     | T3      | N3a     | M0      | IIIB       |
| 28     | QWJ        | 68  | Male   | Adenocarcinoma              | Antrum     | T3      | N2      | M0      | IIIA       |
| 29     | JJB        | 68  | Male   | Adenocarcinoma              | Body       | T3      | N3b     | M0      | IIIB       |
| 30     | LJG        | 82  | Male   | Adenocarcinoma              | Cardia     | T3      | N0      | M0      | IIA        |
| 31     | HYM        | 58  | Female | Adenocarcinoma              | Cardia     | T3      | N0      | M0      | IIA        |
| 32     | HJM        | 71  | Male   | Adenocarcinoma              | Cardia     | T2      | N1      | M0      | IIA        |
| 33     | XXB        | 56  | Female | Adenocarcinoma              | Body       | T2      | N2      | M0      | IIB        |
| 34     | LSB        | 64  | Male   | Adenocarcinoma              | Cardia     | T3      | N1      | M0      | IIB        |
| 35     | WSJ        | 64  | Male   | Adenocarcinoma              | Antrum     | T3      | N2      | M0      | IIIA       |
| 36     | JJX        | 62  | Female | Adenocarcinoma              | Body       | T4a     | N2      | M0      | IIIB       |

**Table S2. Differential expression of genes in Local dataset1**

| Symbol   | logFC  | AveExpr | t       | P. Value | adj. P. Val | B      |
|----------|--------|---------|---------|----------|-------------|--------|
| CWH43    | -1.515 | 8.390   | -10.389 | 0.000    | 0.000       | 25.874 |
| MAL      | -1.721 | 9.090   | -10.134 | 0.000    | 0.000       | 24.841 |
| DGKD     | -1.847 | 12.321  | -10.024 | 0.000    | 0.000       | 24.394 |
| TIMP1    | 2.235  | 12.478  | 9.986   | 0.000    | 0.000       | 24.240 |
| CHGA     | -4.101 | 11.343  | -9.884  | 0.000    | 0.000       | 23.825 |
| ADH7     | -1.541 | 8.392   | -9.821  | 0.000    | 0.000       | 23.567 |
| ALDH6A1  | -1.720 | 10.985  | -9.672  | 0.000    | 0.000       | 22.954 |
| GKN2     | -5.170 | 12.502  | -9.466  | 0.000    | 0.000       | 22.108 |
| FBP2     | -2.390 | 9.391   | -9.247  | 0.000    | 0.000       | 21.207 |
| ABCC8    | -1.180 | 8.400   | -9.236  | 0.000    | 0.000       | 21.158 |
| GKN1     | -5.931 | 14.109  | -9.234  | 0.000    | 0.000       | 21.150 |
| SLC5A5   | -3.105 | 10.111  | -9.223  | 0.000    | 0.000       | 21.104 |
| ESRRG    | -3.300 | 10.089  | -9.198  | 0.000    | 0.000       | 21.003 |
| SOSTDC1  | -2.341 | 9.627   | -9.165  | 0.000    | 0.000       | 20.867 |
| GRIA4    | -1.799 | 8.739   | -9.064  | 0.000    | 0.000       | 20.447 |
| RAB27A   | -1.066 | 11.768  | -8.970  | 0.000    | 0.000       | 20.060 |
| GCNT4    | -1.986 | 10.037  | -8.749  | 0.000    | 0.000       | 19.144 |
| AKR7A3   | -2.957 | 11.867  | -8.741  | 0.000    | 0.000       | 19.109 |
| PXMP2    | -1.686 | 10.419  | -8.703  | 0.000    | 0.000       | 18.952 |
| ACO2     | -1.216 | 12.481  | -8.701  | 0.000    | 0.000       | 18.942 |
| LGALS9C  | -1.913 | 9.575   | -8.695  | 0.000    | 0.000       | 18.917 |
| MSR1     | 1.836  | 9.675   | 8.687   | 0.000    | 0.000       | 18.886 |
| ADAMTS13 | -1.033 | 9.347   | -8.685  | 0.000    | 0.000       | 18.875 |
| KCNE2    | -4.075 | 10.965  | -8.676  | 0.000    | 0.000       | 18.837 |
| COL4A1   | 2.186  | 12.846  | 8.667   | 0.000    | 0.000       | 18.803 |
| LIPF     | -6.289 | 14.963  | -8.666  | 0.000    | 0.000       | 18.797 |
| FAHD2B   | -1.090 | 9.832   | -8.647  | 0.000    | 0.000       | 18.718 |
| PSAPL1   | -2.616 | 9.720   | -8.645  | 0.000    | 0.000       | 18.711 |
| ABCC5    | -1.022 | 11.923  | -8.644  | 0.000    | 0.000       | 18.707 |
| CA4      | -1.312 | 8.483   | -8.623  | 0.000    | 0.000       | 18.618 |
| SLC9A4   | -3.001 | 10.254  | -8.618  | 0.000    | 0.000       | 18.596 |
| HOMER2   | -2.259 | 10.274  | -8.572  | 0.000    | 0.000       | 18.406 |
| CAPN13   | -2.067 | 9.791   | -8.538  | 0.000    | 0.000       | 18.267 |
| GIF      | -5.480 | 12.694  | -8.498  | 0.000    | 0.000       | 18.100 |
| VSIG2    | -3.347 | 12.287  | -8.493  | 0.000    | 0.000       | 18.077 |
| LGALS9B  | -2.044 | 9.758   | -8.492  | 0.000    | 0.000       | 18.075 |
| PPFIBP2  | -1.019 | 10.856  | -8.479  | 0.000    | 0.000       | 18.020 |
| OLFML2B  | 1.628  | 9.410   | 8.471   | 0.000    | 0.000       | 17.987 |
| TTYH3    | 1.551  | 11.119  | 8.396   | 0.000    | 0.000       | 17.673 |
| GATA5    | -1.868 | 9.443   | -8.384  | 0.000    | 0.000       | 17.623 |
| ATP4A    | -5.823 | 12.615  | -8.363  | 0.000    | 0.000       | 17.538 |
| SERPINH1 | 1.284  | 10.604  | 8.356   | 0.000    | 0.000       | 17.506 |
| CPA2     | -3.688 | 10.295  | -8.346  | 0.000    | 0.000       | 17.466 |
| ATP4B    | -5.314 | 11.957  | -8.337  | 0.000    | 0.000       | 17.431 |
| WISP1    | 1.514  | 8.677   | 8.335   | 0.000    | 0.000       | 17.422 |
| COL4A2   | 1.779  | 12.962  | 8.321   | 0.000    | 0.000       | 17.361 |
| THSD4    | -1.465 | 10.290  | -8.301  | 0.000    | 0.000       | 17.279 |

|           |        |        |        |       |       |        |
|-----------|--------|--------|--------|-------|-------|--------|
| FCGR1A    | 1.154  | 8.703  | 8.278  | 0.000 | 0.000 | 17.184 |
| PIK3C2G   | -2.422 | 9.857  | -8.242 | 0.000 | 0.000 | 17.034 |
| EPN3      | -2.003 | 10.373 | -8.237 | 0.000 | 0.000 | 17.014 |
| CA9       | -3.325 | 11.353 | -8.234 | 0.000 | 0.000 | 17.000 |
| RBPJL     | -1.147 | 8.090  | -8.232 | 0.000 | 0.000 | 16.992 |
| INHBA     | 2.638  | 9.781  | 8.217  | 0.000 | 0.000 | 16.931 |
| FAP       | 2.023  | 9.434  | 8.215  | 0.000 | 0.000 | 16.921 |
| SIDT2     | -1.084 | 11.164 | -8.210 | 0.000 | 0.000 | 16.900 |
| SCNN1B    | -1.712 | 9.037  | -8.201 | 0.000 | 0.000 | 16.864 |
| CTXND1    | -1.711 | 8.630  | -8.199 | 0.000 | 0.000 | 16.856 |
| SLC7A8    | -1.501 | 11.036 | -8.199 | 0.000 | 0.000 | 16.854 |
| TREM2     | 1.302  | 8.666  | 8.197  | 0.000 | 0.000 | 16.846 |
| FCER1G    | 1.448  | 10.460 | 8.164  | 0.000 | 0.000 | 16.709 |
| FUT9      | -2.863 | 10.408 | -8.160 | 0.000 | 0.000 | 16.692 |
| MPC1      | -1.073 | 11.010 | -8.145 | 0.000 | 0.000 | 16.628 |
| CTSB      | 1.797  | 13.682 | 8.142  | 0.000 | 0.000 | 16.616 |
| ECHDC3    | -1.499 | 9.428  | -8.131 | 0.000 | 0.000 | 16.572 |
| LOXL2     | 1.559  | 10.430 | 8.127  | 0.000 | 0.000 | 16.554 |
| SEMA6B    | 1.050  | 9.253  | 8.119  | 0.000 | 0.000 | 16.523 |
| MFSD4A    | -3.661 | 11.408 | -8.118 | 0.000 | 0.000 | 16.519 |
| PGA3      | -5.696 | 15.973 | -8.105 | 0.000 | 0.000 | 16.464 |
| VSIG1     | -3.404 | 11.593 | -8.105 | 0.000 | 0.000 | 16.462 |
| UBL3      | -1.117 | 11.878 | -8.104 | 0.000 | 0.000 | 16.459 |
| LINC00675 | -2.095 | 9.932  | -8.082 | 0.000 | 0.000 | 16.368 |
| SMIM6     | -1.356 | 9.347  | -8.072 | 0.000 | 0.000 | 16.328 |
| GPT       | -1.674 | 9.592  | -8.064 | 0.000 | 0.000 | 16.293 |
| LIFR      | -1.981 | 11.180 | -8.057 | 0.000 | 0.000 | 16.262 |
| FBXL13    | -1.160 | 8.637  | -8.037 | 0.000 | 0.000 | 16.182 |
| PGA4      | -6.303 | 15.654 | -8.032 | 0.000 | 0.000 | 16.161 |
| FSIP2     | -1.565 | 9.225  | -8.026 | 0.000 | 0.000 | 16.133 |
| IRX3      | -1.745 | 9.279  | -8.014 | 0.000 | 0.000 | 16.084 |
| OSMR      | 1.287  | 10.503 | 8.009  | 0.000 | 0.000 | 16.063 |
| SUCLG2    | -1.218 | 12.384 | -8.007 | 0.000 | 0.000 | 16.055 |
| ADAMTS14  | 1.237  | 9.332  | 7.998  | 0.000 | 0.000 | 16.017 |
| REP15     | -2.096 | 10.002 | -7.997 | 0.000 | 0.000 | 16.015 |
| SH2B3     | 1.005  | 10.410 | 7.988  | 0.000 | 0.000 | 15.975 |
| SOX21     | -1.846 | 9.095  | -7.980 | 0.000 | 0.000 | 15.943 |
| PGA5      | -6.509 | 15.143 | -7.980 | 0.000 | 0.000 | 15.942 |
| PTGDR2    | -1.204 | 8.949  | -7.978 | 0.000 | 0.000 | 15.936 |
| NRG4      | -1.182 | 8.619  | -7.958 | 0.000 | 0.000 | 15.851 |
| GPT2      | -1.832 | 10.459 | -7.957 | 0.000 | 0.000 | 15.850 |
| IGFALS    | -1.581 | 8.820  | -7.951 | 0.000 | 0.000 | 15.823 |
| CD44      | 1.066  | 12.300 | 7.948  | 0.000 | 0.000 | 15.809 |
| NID2      | 1.392  | 9.688  | 7.947  | 0.000 | 0.000 | 15.808 |
| PLA2G7    | 1.346  | 9.059  | 7.932  | 0.000 | 0.000 | 15.744 |
| CLDN1     | 1.949  | 9.335  | 7.923  | 0.000 | 0.000 | 15.706 |
| LDHD      | -1.612 | 9.876  | -7.889 | 0.000 | 0.000 | 15.567 |
| CHI3L1    | 2.146  | 9.480  | 7.884  | 0.000 | 0.000 | 15.543 |
| TRIM50    | -2.699 | 9.450  | -7.876 | 0.000 | 0.000 | 15.511 |
| RASSF6    | -1.531 | 10.844 | -7.873 | 0.000 | 0.000 | 15.500 |

|          |        |        |        |       |       |        |
|----------|--------|--------|--------|-------|-------|--------|
| TTR      | -1.597 | 8.835  | -7.871 | 0.000 | 0.000 | 15.490 |
| TM7SF2   | -1.245 | 9.772  | -7.849 | 0.000 | 0.000 | 15.399 |
| ELOVL5   | 1.176  | 10.582 | 7.837  | 0.000 | 0.000 | 15.348 |
| SLC26A7  | -1.666 | 8.868  | -7.832 | 0.000 | 0.000 | 15.327 |
| GATA6    | -1.763 | 11.577 | -7.831 | 0.000 | 0.000 | 15.323 |
| ACSS1    | -1.236 | 12.162 | -7.830 | 0.000 | 0.000 | 15.319 |
| CHAD     | -1.160 | 8.263  | -7.823 | 0.000 | 0.000 | 15.292 |
| EPHB3    | -1.328 | 10.936 | -7.822 | 0.000 | 0.000 | 15.288 |
| TGFBI    | 1.591  | 11.630 | 7.814  | 0.000 | 0.000 | 15.252 |
| FAM174B  | -1.254 | 10.517 | -7.803 | 0.000 | 0.000 | 15.208 |
| TMEM92   | -1.314 | 9.555  | -7.798 | 0.000 | 0.000 | 15.188 |
| RGL3     | -1.255 | 9.929  | -7.786 | 0.000 | 0.000 | 15.139 |
| DMRTA1   | -1.085 | 8.656  | -7.785 | 0.000 | 0.000 | 15.131 |
| SDS      | 1.523  | 8.726  | 7.782  | 0.000 | 0.000 | 15.120 |
| MYRIP    | -1.421 | 9.177  | -7.775 | 0.000 | 0.000 | 15.093 |
| COL6A3   | 2.080  | 12.651 | 7.774  | 0.000 | 0.000 | 15.088 |
| PSCA     | -4.157 | 12.590 | -7.770 | 0.000 | 0.000 | 15.070 |
| PKIB     | -1.379 | 9.445  | -7.762 | 0.000 | 0.000 | 15.039 |
| CKB      | -2.810 | 12.059 | -7.758 | 0.000 | 0.000 | 15.022 |
| HAVCR2   | 1.066  | 9.250  | 7.752  | 0.000 | 0.000 | 14.997 |
| ERO1B    | -2.060 | 11.006 | -7.741 | 0.000 | 0.000 | 14.950 |
| COL8A1   | 2.245  | 10.230 | 7.735  | 0.000 | 0.000 | 14.923 |
| SST      | -2.592 | 9.698  | -7.727 | 0.000 | 0.000 | 14.892 |
| MUC6     | -4.643 | 13.458 | -7.721 | 0.000 | 0.000 | 14.869 |
| NROB2    | -1.512 | 9.338  | -7.717 | 0.000 | 0.000 | 14.850 |
| STOM     | 1.212  | 11.996 | 7.716  | 0.000 | 0.000 | 14.845 |
| PGC      | -5.649 | 16.320 | -7.713 | 0.000 | 0.000 | 14.833 |
| DBT      | -1.197 | 11.004 | -7.706 | 0.000 | 0.000 | 14.803 |
| TFCP2L1  | -1.773 | 10.620 | -7.705 | 0.000 | 0.000 | 14.800 |
| B4GALNT3 | -2.298 | 11.743 | -7.666 | 0.000 | 0.000 | 14.637 |
| ESM1     | 1.548  | 8.684  | 7.665  | 0.000 | 0.000 | 14.636 |
| SLC2A12  | -1.996 | 9.821  | -7.664 | 0.000 | 0.000 | 14.632 |
| TMEM171  | -1.903 | 9.816  | -7.636 | 0.000 | 0.000 | 14.513 |
| PAIP2B   | -1.685 | 9.970  | -7.630 | 0.000 | 0.000 | 14.487 |
| FCGR2A   | 1.530  | 10.022 | 7.626  | 0.000 | 0.000 | 14.473 |
| LILRB2   | 1.028  | 9.147  | 7.626  | 0.000 | 0.000 | 14.473 |
| ANGPT2   | 1.037  | 9.019  | 7.622  | 0.000 | 0.000 | 14.457 |
| ADAM28   | -1.807 | 11.685 | -7.621 | 0.000 | 0.000 | 14.452 |
| MT1G     | -2.882 | 11.281 | -7.620 | 0.000 | 0.000 | 14.450 |
| GPRC5C   | -1.867 | 11.149 | -7.619 | 0.000 | 0.000 | 14.444 |
| FPR3     | 1.273  | 9.659  | 7.619  | 0.000 | 0.000 | 14.444 |
| XYLT2    | -1.855 | 11.612 | -7.606 | 0.000 | 0.000 | 14.390 |
| VASH1    | 1.022  | 10.255 | 7.601  | 0.000 | 0.000 | 14.370 |
| GSTA1    | -2.767 | 11.022 | -7.595 | 0.000 | 0.000 | 14.344 |
| MSN      | 1.069  | 12.694 | 7.588  | 0.000 | 0.000 | 14.313 |
| INSRR    | -1.035 | 8.107  | -7.583 | 0.000 | 0.000 | 14.292 |
| CYB5R1   | -1.239 | 11.193 | -7.582 | 0.000 | 0.000 | 14.290 |
| THBS1    | 2.400  | 12.043 | 7.570  | 0.000 | 0.000 | 14.242 |
| ICAM1    | 1.352  | 10.717 | 7.557  | 0.000 | 0.000 | 14.185 |
| F2R      | 1.329  | 10.706 | 7.551  | 0.000 | 0.000 | 14.160 |

|          |        |        |        |       |       |        |
|----------|--------|--------|--------|-------|-------|--------|
| NCF2     | 1.217  | 9.600  | 7.541  | 0.000 | 0.000 | 14.121 |
| SIRPA    | 1.093  | 10.646 | 7.536  | 0.000 | 0.000 | 14.099 |
| STX12    | -1.026 | 11.946 | -7.532 | 0.000 | 0.000 | 14.081 |
| PNPLA7   | -1.308 | 10.143 | -7.525 | 0.000 | 0.000 | 14.054 |
| ADHFE1   | -1.405 | 9.501  | -7.524 | 0.000 | 0.000 | 14.048 |
| UPP1     | 1.014  | 9.633  | 7.522  | 0.000 | 0.000 | 14.042 |
| THY1     | 1.940  | 11.064 | 7.503  | 0.000 | 0.000 | 13.962 |
| SERPINB9 | 1.047  | 9.853  | 7.494  | 0.000 | 0.000 | 13.923 |
| C11orf52 | -1.167 | 9.501  | -7.493 | 0.000 | 0.000 | 13.921 |
| PDILT    | -2.313 | 9.000  | -7.480 | 0.000 | 0.000 | 13.867 |
| HPN      | -2.178 | 9.862  | -7.472 | 0.000 | 0.000 | 13.834 |
| CLEC5A   | 1.275  | 8.262  | 7.462  | 0.000 | 0.000 | 13.791 |
| CYSTM1   | -2.320 | 13.808 | -7.460 | 0.000 | 0.000 | 13.784 |
| WIPF3    | -1.558 | 9.637  | -7.448 | 0.000 | 0.000 | 13.733 |
| APOC1    | 1.410  | 9.849  | 7.446  | 0.000 | 0.000 | 13.728 |
| GCKR     | -1.031 | 8.733  | -7.445 | 0.000 | 0.000 | 13.723 |
| ARHGEF37 | -1.414 | 10.770 | -7.436 | 0.000 | 0.000 | 13.687 |
| TRIM74   | -1.684 | 9.136  | -7.435 | 0.000 | 0.000 | 13.682 |
| C16orf89 | -2.478 | 10.410 | -7.435 | 0.000 | 0.000 | 13.680 |
| SH3GL2   | -1.621 | 8.615  | -7.417 | 0.000 | 0.000 | 13.605 |
| MDFI     | 1.175  | 8.873  | 7.401  | 0.000 | 0.000 | 13.539 |
| SLC26A9  | -2.643 | 10.648 | -7.392 | 0.000 | 0.000 | 13.503 |
| FA2H     | -1.685 | 10.583 | -7.387 | 0.000 | 0.000 | 13.484 |
| EPB41L4B | -1.660 | 10.905 | -7.382 | 0.000 | 0.000 | 13.461 |
| SRPX2    | 1.338  | 9.558  | 7.378  | 0.000 | 0.000 | 13.443 |
| ANGPTL3  | -1.277 | 8.247  | -7.375 | 0.000 | 0.000 | 13.434 |
| ALDH3A1  | -2.536 | 11.104 | -7.372 | 0.000 | 0.000 | 13.418 |
| ANXA10   | -3.182 | 12.040 | -7.370 | 0.000 | 0.000 | 13.410 |
| LYPD6B   | -1.665 | 9.929  | -7.369 | 0.000 | 0.000 | 13.410 |
| ADAMTS12 | 1.559  | 9.056  | 7.354  | 0.000 | 0.000 | 13.345 |
| BMP1     | 1.076  | 10.055 | 7.353  | 0.000 | 0.000 | 13.341 |
| STARD10  | -1.333 | 11.602 | -7.353 | 0.000 | 0.000 | 13.340 |
| SPARC    | 1.819  | 14.034 | 7.318  | 0.000 | 0.000 | 13.198 |
| B3GAT1   | -2.136 | 9.605  | -7.310 | 0.000 | 0.000 | 13.165 |
| FXYP4    | -1.194 | 8.239  | -7.307 | 0.000 | 0.000 | 13.152 |
| CAPN9    | -2.210 | 10.260 | -7.305 | 0.000 | 0.000 | 13.144 |
| KLF15    | -1.395 | 9.183  | -7.305 | 0.000 | 0.000 | 13.144 |
| GHRL     | -2.788 | 10.123 | -7.296 | 0.000 | 0.000 | 13.108 |
| CKMT2    | -1.800 | 9.073  | -7.291 | 0.000 | 0.000 | 13.084 |
| FAM189A2 | -1.273 | 9.646  | -7.289 | 0.000 | 0.000 | 13.076 |
| KAZALD1  | -1.186 | 9.932  | -7.289 | 0.000 | 0.000 | 13.076 |
| TPCN2    | -2.138 | 11.150 | -7.278 | 0.000 | 0.000 | 13.033 |
| MUC5AC   | -4.179 | 13.700 | -7.277 | 0.000 | 0.000 | 13.028 |
| FRMD1    | -2.216 | 9.236  | -7.267 | 0.000 | 0.000 | 12.988 |
| UGT2B15  | -1.948 | 9.509  | -7.266 | 0.000 | 0.000 | 12.983 |
| RAP1GAP  | -2.363 | 11.400 | -7.255 | 0.000 | 0.000 | 12.938 |
| SELENBP1 | -1.473 | 11.549 | -7.252 | 0.000 | 0.000 | 12.926 |
| ACAN     | 1.179  | 8.303  | 7.245  | 0.000 | 0.000 | 12.894 |
| PTPRZ1   | -1.399 | 9.534  | -7.242 | 0.000 | 0.000 | 12.885 |
| SLC25A4  | -1.609 | 11.346 | -7.242 | 0.000 | 0.000 | 12.885 |

|          |        |        |        |       |       |        |
|----------|--------|--------|--------|-------|-------|--------|
| GCNT2    | -1.393 | 9.953  | -7.234 | 0.000 | 0.000 | 12.848 |
| MFAP2    | 1.486  | 9.256  | 7.224  | 0.000 | 0.000 | 12.808 |
| ADAMTS9  | 1.186  | 9.575  | 7.218  | 0.000 | 0.000 | 12.786 |
| CHRD2    | 1.579  | 9.035  | 7.214  | 0.000 | 0.000 | 12.768 |
| TTC6     | -1.108 | 8.693  | -7.212 | 0.000 | 0.000 | 12.758 |
| LILRB4   | 1.310  | 9.277  | 7.210  | 0.000 | 0.000 | 12.753 |
| MICALL1  | -1.659 | 10.951 | -7.208 | 0.000 | 0.000 | 12.744 |
| CLCNKA   | -1.500 | 8.672  | -7.202 | 0.000 | 0.000 | 12.718 |
| PDIA2    | -2.863 | 10.595 | -7.196 | 0.000 | 0.000 | 12.694 |
| TRIM73   | -1.452 | 9.069  | -7.177 | 0.000 | 0.000 | 12.617 |
| MAP7D2   | -1.608 | 9.503  | -7.167 | 0.000 | 0.000 | 12.574 |
| SLC1A2   | -1.582 | 9.170  | -7.161 | 0.000 | 0.000 | 12.549 |
| FCGR3A   | 1.722  | 10.387 | 7.158  | 0.000 | 0.000 | 12.538 |
| KLHDC7A  | -1.134 | 9.074  | -7.146 | 0.000 | 0.000 | 12.488 |
| PLAU     | 1.665  | 10.805 | 7.129  | 0.000 | 0.000 | 12.417 |
| SCGB2A1  | -1.193 | 8.584  | -7.128 | 0.000 | 0.000 | 12.415 |
| AQP4     | -2.751 | 9.393  | -7.123 | 0.000 | 0.000 | 12.391 |
| SLC9A2   | -1.877 | 10.429 | -7.117 | 0.000 | 0.000 | 12.366 |
| GOT1     | -1.061 | 11.218 | -7.108 | 0.000 | 0.000 | 12.332 |
| SERPINE1 | 2.074  | 9.978  | 7.103  | 0.000 | 0.000 | 12.309 |
| FAM3B    | -2.181 | 11.069 | -7.102 | 0.000 | 0.000 | 12.305 |
| ARHGEF28 | -1.356 | 10.759 | -7.098 | 0.000 | 0.000 | 12.292 |
| KLHL23   | 1.255  | 9.379  | 7.094  | 0.000 | 0.000 | 12.272 |
| LNX1     | -1.011 | 9.633  | -7.093 | 0.000 | 0.000 | 12.270 |
| COL15A1  | 1.307  | 11.963 | 7.087  | 0.000 | 0.000 | 12.243 |
| THBS2    | 2.483  | 10.564 | 7.084  | 0.000 | 0.000 | 12.234 |
| KCNQ1    | -2.185 | 11.531 | -7.082 | 0.000 | 0.000 | 12.226 |
| LIF      | 1.343  | 9.378  | 7.080  | 0.000 | 0.000 | 12.217 |
| PLLP     | -1.632 | 10.667 | -7.077 | 0.000 | 0.000 | 12.202 |
| CCKAR    | -1.713 | 8.564  | -7.073 | 0.000 | 0.000 | 12.188 |
| FN1      | 2.512  | 12.988 | 7.069  | 0.000 | 0.000 | 12.173 |
| BGN      | 1.978  | 11.240 | 7.067  | 0.000 | 0.000 | 12.163 |
| IGSF3    | -1.053 | 10.251 | -7.057 | 0.000 | 0.000 | 12.123 |
| PLIN5    | -2.196 | 10.066 | -7.057 | 0.000 | 0.000 | 12.121 |
| CD14     | 1.116  | 10.558 | 7.052  | 0.000 | 0.000 | 12.102 |
| DHCR24   | -1.328 | 12.441 | -7.049 | 0.000 | 0.000 | 12.090 |
| ARHGDIG  | -1.364 | 8.748  | -7.045 | 0.000 | 0.000 | 12.073 |
| KLK11    | -2.335 | 10.140 | -7.041 | 0.000 | 0.000 | 12.057 |
| HIP1R    | -1.261 | 11.930 | -7.039 | 0.000 | 0.000 | 12.046 |
| ITGAX    | 1.474  | 10.154 | 7.023  | 0.000 | 0.000 | 11.981 |
| GNB4     | 1.080  | 10.456 | 7.023  | 0.000 | 0.000 | 11.980 |
| CST1     | 2.263  | 8.846  | 7.022  | 0.000 | 0.000 | 11.978 |
| TNFAIP3  | 1.085  | 10.920 | 7.001  | 0.000 | 0.000 | 11.890 |
| PBLD     | -1.515 | 10.562 | -6.995 | 0.000 | 0.000 | 11.865 |
| IL17RE   | -1.076 | 10.249 | -6.986 | 0.000 | 0.000 | 11.829 |
| ACADL    | -1.039 | 8.411  | -6.978 | 0.000 | 0.000 | 11.797 |
| CMTM4    | -1.307 | 11.647 | -6.973 | 0.000 | 0.000 | 11.775 |
| CHIA     | -4.007 | 10.099 | -6.962 | 0.000 | 0.000 | 11.731 |
| APLP1    | -1.979 | 9.887  | -6.958 | 0.000 | 0.000 | 11.714 |
| SLC25A5  | -1.143 | 13.737 | -6.953 | 0.000 | 0.000 | 11.696 |



|           |        |        |        |       |       |        |
|-----------|--------|--------|--------|-------|-------|--------|
| COL2A1    | -2.793 | 9.395  | -6.942 | 0.000 | 0.000 | 11.651 |
| DUOX1     | -2.202 | 10.070 | -6.936 | 0.000 | 0.000 | 11.623 |
| IGSF6     | 1.052  | 9.492  | 6.933  | 0.000 | 0.000 | 11.613 |
| SH3BGRL2  | -1.158 | 12.108 | -6.930 | 0.000 | 0.000 | 11.599 |
| SCNN1G    | -1.574 | 8.546  | -6.925 | 0.000 | 0.000 | 11.581 |
| COL3A1    | 2.048  | 14.709 | 6.921  | 0.000 | 0.000 | 11.563 |
| COL18A1   | 1.214  | 11.698 | 6.916  | 0.000 | 0.000 | 11.541 |
| DCXR      | -1.013 | 10.309 | -6.910 | 0.000 | 0.000 | 11.518 |
| ADGRG2    | -1.050 | 8.737  | -6.899 | 0.000 | 0.000 | 11.472 |
| IFITM3    | 1.066  | 12.813 | 6.895  | 0.000 | 0.000 | 11.455 |
| CLIC6     | -2.846 | 11.626 | -6.893 | 0.000 | 0.000 | 11.447 |
| ADAMTS4   | 1.600  | 9.619  | 6.888  | 0.000 | 0.000 | 11.427 |
| TMED6     | -2.049 | 9.343  | -6.885 | 0.000 | 0.000 | 11.417 |
| TFF1      | -3.413 | 13.702 | -6.882 | 0.000 | 0.000 | 11.405 |
| SSTR1     | -1.709 | 10.056 | -6.880 | 0.000 | 0.000 | 11.393 |
| RORC      | -1.347 | 9.838  | -6.879 | 0.000 | 0.000 | 11.391 |
| TYMP      | 1.431  | 11.396 | 6.875  | 0.000 | 0.000 | 11.374 |
| FMNL3     | 1.040  | 10.425 | 6.870  | 0.000 | 0.000 | 11.354 |
| ADA       | -1.350 | 10.324 | -6.866 | 0.000 | 0.000 | 11.339 |
| SULT2A1   | -2.388 | 9.197  | -6.858 | 0.000 | 0.000 | 11.305 |
| PXDN      | 1.340  | 10.855 | 6.857  | 0.000 | 0.000 | 11.303 |
| TFF2      | -3.588 | 12.799 | -6.843 | 0.000 | 0.000 | 11.246 |
| HAPLN3    | 1.092  | 9.498  | 6.838  | 0.000 | 0.000 | 11.225 |
| KIAA1324  | -2.209 | 12.119 | -6.838 | 0.000 | 0.000 | 11.225 |
| ASB11     | -1.539 | 8.427  | -6.835 | 0.000 | 0.000 | 11.213 |
| TESC      | -1.245 | 10.813 | -6.834 | 0.000 | 0.000 | 11.209 |
| HYAL1     | -1.093 | 9.683  | -6.834 | 0.000 | 0.000 | 11.207 |
| SYTL1     | -1.263 | 10.942 | -6.834 | 0.000 | 0.000 | 11.206 |
| KCNJ13    | -1.153 | 8.169  | -6.827 | 0.000 | 0.000 | 11.179 |
| CXCL17    | -2.996 | 11.446 | -6.824 | 0.000 | 0.000 | 11.166 |
| FOXA3     | -1.370 | 10.664 | -6.813 | 0.000 | 0.000 | 11.121 |
| COL5A2    | 1.810  | 11.788 | 6.808  | 0.000 | 0.000 | 11.099 |
| FNDC1     | 1.968  | 9.057  | 6.802  | 0.000 | 0.000 | 11.075 |
| SMIM11B   | -1.256 | 9.343  | -6.801 | 0.000 | 0.000 | 11.074 |
| RGMB      | -1.651 | 11.371 | -6.798 | 0.000 | 0.000 | 11.059 |
| FSTL1     | 1.475  | 12.496 | 6.788  | 0.000 | 0.000 | 11.020 |
| ASPN      | 1.837  | 10.312 | 6.786  | 0.000 | 0.000 | 11.012 |
| MT1F      | -1.725 | 10.323 | -6.776 | 0.000 | 0.000 | 10.970 |
| SGK2      | -1.137 | 9.990  | -6.775 | 0.000 | 0.000 | 10.968 |
| IER5L     | 1.022  | 9.650  | 6.768  | 0.000 | 0.000 | 10.938 |
| MYOC      | -1.826 | 8.946  | -6.766 | 0.000 | 0.000 | 10.931 |
| CDC42BPG  | -1.180 | 10.496 | -6.754 | 0.000 | 0.000 | 10.879 |
| CTHRC1    | 1.811  | 9.579  | 6.753  | 0.000 | 0.000 | 10.876 |
| SULF1     | 2.325  | 10.683 | 6.750  | 0.000 | 0.000 | 10.864 |
| DNER      | -1.904 | 8.960  | -6.747 | 0.000 | 0.000 | 10.850 |
| SMIM11A   | -1.395 | 10.392 | -6.739 | 0.000 | 0.000 | 10.821 |
| HEYL      | 1.266  | 9.253  | 6.730  | 0.000 | 0.000 | 10.782 |
| ADAMTS2   | 1.717  | 9.966  | 6.728  | 0.000 | 0.000 | 10.774 |
| COL1A1    | 2.307  | 14.245 | 6.722  | 0.000 | 0.000 | 10.752 |
| AP003071. | -2.135 | 9.150  | -6.717 | 0.000 | 0.000 | 10.729 |

|           |        |        |        |       |       |        |
|-----------|--------|--------|--------|-------|-------|--------|
| GLUL      | -1.579 | 14.485 | -6.714 | 0.000 | 0.000 | 10.720 |
| FPR1      | 1.179  | 8.956  | 6.710  | 0.000 | 0.000 | 10.703 |
| TMPRSS2   | -2.159 | 12.550 | -6.708 | 0.000 | 0.000 | 10.695 |
| IGFBP2    | -2.075 | 12.591 | -6.705 | 0.000 | 0.000 | 10.682 |
| ECI2      | -1.198 | 11.220 | -6.679 | 0.000 | 0.000 | 10.577 |
| NEDD4L    | -1.127 | 11.473 | -6.672 | 0.000 | 0.000 | 10.545 |
| PDGFD     | -1.246 | 10.303 | -6.664 | 0.000 | 0.000 | 10.512 |
| PMEPA1    | 1.406  | 11.045 | 6.661  | 0.000 | 0.000 | 10.500 |
| COBLL1    | -1.235 | 11.042 | -6.656 | 0.000 | 0.000 | 10.483 |
| CTSL      | 1.245  | 11.152 | 6.654  | 0.000 | 0.000 | 10.472 |
| FAM198B   | 1.326  | 11.021 | 6.653  | 0.000 | 0.000 | 10.471 |
| RDH12     | -1.152 | 8.600  | -6.651 | 0.000 | 0.000 | 10.460 |
| HPGD      | -2.010 | 11.309 | -6.648 | 0.000 | 0.000 | 10.450 |
| C1orf116  | -1.771 | 11.646 | -6.648 | 0.000 | 0.000 | 10.447 |
| SLAMF8    | 1.142  | 9.391  | 6.645  | 0.000 | 0.000 | 10.439 |
| RASAL2    | 1.060  | 9.421  | 6.643  | 0.000 | 0.000 | 10.431 |
| ENTPD1    | 1.191  | 10.335 | 6.642  | 0.000 | 0.000 | 10.426 |
| TNFRSF12F | 1.303  | 9.649  | 6.639  | 0.000 | 0.000 | 10.414 |
| SH3PXD2B  | 1.396  | 10.166 | 6.638  | 0.000 | 0.000 | 10.409 |
| ANO7      | -1.593 | 9.954  | -6.635 | 0.000 | 0.000 | 10.395 |
| COL1A2    | 1.984  | 13.854 | 6.631  | 0.000 | 0.000 | 10.381 |
| NNMT      | 1.427  | 10.584 | 6.631  | 0.000 | 0.000 | 10.378 |
| NOSTRIN   | -1.003 | 10.651 | -6.624 | 0.000 | 0.000 | 10.353 |
| ACAT1     | -1.100 | 11.502 | -6.623 | 0.000 | 0.000 | 10.347 |
| SIGLEC11  | -1.346 | 8.605  | -6.622 | 0.000 | 0.000 | 10.344 |
| C5orf38   | -1.158 | 8.509  | -6.620 | 0.000 | 0.000 | 10.334 |
| ETNPPL    | -1.807 | 8.596  | -6.618 | 0.000 | 0.000 | 10.329 |
| SOX2      | -1.363 | 9.449  | -6.608 | 0.000 | 0.000 | 10.286 |
| LRP8      | 1.240  | 8.610  | 6.603  | 0.000 | 0.000 | 10.265 |
| ESRRB     | -1.334 | 8.492  | -6.591 | 0.000 | 0.000 | 10.216 |
| RGS11     | -1.146 | 9.694  | -6.586 | 0.000 | 0.000 | 10.198 |
| MT1X      | -1.703 | 11.292 | -6.583 | 0.000 | 0.000 | 10.184 |
| KRT80     | 1.202  | 8.197  | 6.580  | 0.000 | 0.000 | 10.175 |
| SULT1C2   | -2.591 | 12.176 | -6.576 | 0.000 | 0.000 | 10.157 |
| PDCD4     | -1.085 | 12.445 | -6.572 | 0.000 | 0.000 | 10.142 |
| IDH2      | -1.573 | 12.713 | -6.561 | 0.000 | 0.000 | 10.094 |
| TPD52L1   | -1.473 | 10.020 | -6.558 | 0.000 | 0.000 | 10.086 |
| TFR2      | -1.235 | 9.115  | -6.537 | 0.000 | 0.000 | 9.997  |
| GREM2     | -1.532 | 9.853  | -6.535 | 0.000 | 0.000 | 9.992  |
| RAB17     | -1.248 | 10.503 | -6.521 | 0.000 | 0.000 | 9.934  |
| CRISPLD1  | 1.144  | 8.615  | 6.518  | 0.000 | 0.000 | 9.923  |
| GC        | -1.706 | 9.096  | -6.518 | 0.000 | 0.000 | 9.921  |
| FM05      | -1.469 | 10.355 | -6.502 | 0.000 | 0.000 | 9.855  |
| PRRX1     | 1.743  | 9.616  | 6.485  | 0.000 | 0.000 | 9.787  |
| FAM46C    | -1.162 | 11.743 | -6.480 | 0.000 | 0.000 | 9.769  |
| RPS10-NUI | 1.077  | 8.009  | 6.478  | 0.000 | 0.000 | 9.761  |
| CDC25B    | 1.214  | 11.231 | 6.478  | 0.000 | 0.000 | 9.760  |
| SULT1B1   | -1.852 | 10.777 | -6.473 | 0.000 | 0.000 | 9.740  |
| CA2       | -2.666 | 12.935 | -6.472 | 0.000 | 0.000 | 9.736  |
| SPI1      | 1.064  | 10.009 | 6.467  | 0.000 | 0.000 | 9.716  |

|          |        |        |        |       |       |       |
|----------|--------|--------|--------|-------|-------|-------|
| PALM3    | -1.890 | 10.246 | -6.466 | 0.000 | 0.000 | 9.711 |
| SPP1     | 2.143  | 9.686  | 6.463  | 0.000 | 0.000 | 9.699 |
| ALDH1A1  | -2.211 | 13.763 | -6.461 | 0.000 | 0.000 | 9.691 |
| GRIP2    | -1.637 | 9.603  | -6.460 | 0.000 | 0.000 | 9.687 |
| MYOF     | 1.120  | 11.435 | 6.456  | 0.000 | 0.000 | 9.672 |
| APOE     | 1.529  | 12.128 | 6.454  | 0.000 | 0.000 | 9.665 |
| SELE     | 1.614  | 8.928  | 6.439  | 0.000 | 0.000 | 9.603 |
| F2RL2    | 1.498  | 9.148  | 6.425  | 0.000 | 0.000 | 9.547 |
| DUSP4    | -1.568 | 11.685 | -6.412 | 0.000 | 0.000 | 9.493 |
| SERPINA4 | -1.784 | 9.715  | -6.411 | 0.000 | 0.000 | 9.489 |
| GGT6     | -1.618 | 9.805  | -6.408 | 0.000 | 0.000 | 9.479 |
| CASZ1    | -1.008 | 10.973 | -6.407 | 0.000 | 0.000 | 9.474 |
| ITGA5    | 1.154  | 11.100 | 6.405  | 0.000 | 0.000 | 9.466 |
| IGF2BP3  | 1.420  | 8.602  | 6.398  | 0.000 | 0.000 | 9.436 |
| IRX2     | -1.944 | 9.647  | -6.386 | 0.000 | 0.000 | 9.388 |
| ZNF385B  | -1.481 | 9.012  | -6.385 | 0.000 | 0.000 | 9.385 |
| ACADS    | -1.089 | 10.841 | -6.378 | 0.000 | 0.000 | 9.356 |
| MT1M     | -1.704 | 9.680  | -6.377 | 0.000 | 0.000 | 9.353 |
| CRACR2B  | -1.240 | 10.943 | -6.376 | 0.000 | 0.000 | 9.350 |
| DUOXA1   | -1.306 | 8.872  | -6.376 | 0.000 | 0.000 | 9.348 |
| RASSF10  | -1.032 | 8.919  | -6.366 | 0.000 | 0.000 | 9.310 |
| CGNL1    | -1.505 | 10.451 | -6.357 | 0.000 | 0.000 | 9.271 |
| CD93     | 1.101  | 11.367 | 6.356  | 0.000 | 0.000 | 9.268 |
| HMGCS2   | -2.310 | 11.017 | -6.350 | 0.000 | 0.000 | 9.243 |
| GALNT12  | -1.123 | 10.971 | -6.344 | 0.000 | 0.000 | 9.220 |
| AZGP1    | -1.972 | 10.967 | -6.343 | 0.000 | 0.000 | 9.216 |
| BICC1    | 1.090  | 9.435  | 6.338  | 0.000 | 0.000 | 9.198 |
| C1orf210 | -1.171 | 9.946  | -6.337 | 0.000 | 0.000 | 9.190 |
| KCNJ15   | -1.576 | 9.831  | -6.326 | 0.000 | 0.000 | 9.149 |
| ARL14    | -1.637 | 10.455 | -6.325 | 0.000 | 0.000 | 9.142 |
| RGS16    | 1.198  | 9.509  | 6.320  | 0.000 | 0.000 | 9.125 |
| PKDCC    | 1.091  | 9.973  | 6.317  | 0.000 | 0.000 | 9.113 |
| PLXDC2   | 1.314  | 10.817 | 6.308  | 0.000 | 0.000 | 9.076 |
| EEF1A2   | -1.213 | 9.018  | -6.300 | 0.000 | 0.000 | 9.045 |
| DEPTOR   | -1.161 | 10.721 | -6.297 | 0.000 | 0.000 | 9.031 |
| NTN4     | -1.144 | 11.043 | -6.291 | 0.000 | 0.000 | 9.007 |
| COL5A1   | 1.544  | 12.100 | 6.287  | 0.000 | 0.000 | 8.991 |
| SALL4    | 1.156  | 8.522  | 6.284  | 0.000 | 0.000 | 8.981 |
| CNTD1    | -1.283 | 8.520  | -6.276 | 0.000 | 0.000 | 8.948 |
| BSPRY    | -1.026 | 10.125 | -6.274 | 0.000 | 0.000 | 8.938 |
| PROM2    | -1.421 | 10.614 | -6.271 | 0.000 | 0.000 | 8.926 |
| SPTSSB   | -1.655 | 9.923  | -6.270 | 0.000 | 0.000 | 8.922 |
| ADH1C    | -2.867 | 12.071 | -6.268 | 0.000 | 0.000 | 8.916 |
| CEBPB    | 1.163  | 11.476 | 6.266  | 0.000 | 0.000 | 8.908 |
| PTGR1    | -1.191 | 11.195 | -6.265 | 0.000 | 0.000 | 8.901 |
| HMOX1    | 1.374  | 10.055 | 6.261  | 0.000 | 0.000 | 8.887 |
| VCAN     | 1.680  | 10.825 | 6.236  | 0.000 | 0.000 | 8.789 |
| SLC28A2  | -2.714 | 10.264 | -6.231 | 0.000 | 0.000 | 8.769 |
| SOWAHA   | -1.062 | 9.362  | -6.224 | 0.000 | 0.000 | 8.741 |
| GPR155   | -2.140 | 11.191 | -6.221 | 0.000 | 0.000 | 8.727 |

|           |        |        |        |       |       |       |
|-----------|--------|--------|--------|-------|-------|-------|
| TNC       | 1.559  | 11.065 | 6.213  | 0.000 | 0.000 | 8.696 |
| NCMAP     | -1.162 | 9.229  | -6.209 | 0.000 | 0.000 | 8.681 |
| CLEC3B    | -1.372 | 10.321 | -6.208 | 0.000 | 0.000 | 8.673 |
| FUT1      | -1.352 | 9.909  | -6.203 | 0.000 | 0.000 | 8.657 |
| HRH2      | -1.643 | 9.936  | -6.201 | 0.000 | 0.000 | 8.647 |
| RBM47     | -1.190 | 12.214 | -6.200 | 0.000 | 0.000 | 8.643 |
| C14orf18C | -1.103 | 8.201  | -6.196 | 0.000 | 0.000 | 8.628 |
| AKR1C1    | -1.685 | 11.121 | -6.195 | 0.000 | 0.000 | 8.624 |
| RGN       | -1.100 | 9.311  | -6.192 | 0.000 | 0.000 | 8.610 |
| SMIM24    | -1.990 | 11.118 | -6.192 | 0.000 | 0.000 | 8.610 |
| CCL18     | 1.616  | 9.303  | 6.184  | 0.000 | 0.000 | 8.578 |
| APOBEC2   | -1.281 | 8.661  | -6.182 | 0.000 | 0.000 | 8.571 |
| PLXDC1    | 1.090  | 10.074 | 6.176  | 0.000 | 0.000 | 8.549 |
| MT1E      | -1.788 | 11.848 | -6.172 | 0.000 | 0.000 | 8.530 |
| BCAS1     | -2.166 | 12.143 | -6.163 | 0.000 | 0.000 | 8.495 |
| ATP8A1    | -1.068 | 11.139 | -6.162 | 0.000 | 0.000 | 8.493 |
| PDGFRB    | 1.403  | 11.396 | 6.154  | 0.000 | 0.000 | 8.462 |
| GPNMB     | 1.231  | 10.882 | 6.154  | 0.000 | 0.000 | 8.461 |
| C5        | -1.031 | 9.692  | -6.150 | 0.000 | 0.000 | 8.445 |
| MYRF      | -1.446 | 11.335 | -6.138 | 0.000 | 0.000 | 8.396 |
| AKR1B10   | -2.994 | 12.376 | -6.137 | 0.000 | 0.000 | 8.394 |
| PDLIM7    | 1.083  | 10.986 | 6.136  | 0.000 | 0.000 | 8.389 |
| CYBB      | 1.209  | 11.134 | 6.134  | 0.000 | 0.000 | 8.379 |
| MMP14     | 1.166  | 12.577 | 6.133  | 0.000 | 0.000 | 8.377 |
| HGD       | -1.101 | 9.855  | -6.133 | 0.000 | 0.000 | 8.376 |
| IGFBP7    | 1.219  | 12.691 | 6.131  | 0.000 | 0.000 | 8.370 |
| MRC2      | 1.172  | 11.027 | 6.121  | 0.000 | 0.000 | 8.328 |
| CARNS1    | -1.388 | 9.374  | -6.113 | 0.000 | 0.000 | 8.296 |
| GLIPR1    | 1.082  | 10.339 | 6.106  | 0.000 | 0.000 | 8.268 |
| TMEM30B   | -1.359 | 11.174 | -6.106 | 0.000 | 0.000 | 8.268 |
| FKBP10    | 1.153  | 10.285 | 6.105  | 0.000 | 0.000 | 8.265 |
| SEMA3B    | -1.177 | 10.828 | -6.103 | 0.000 | 0.000 | 8.256 |
| TNFAIP6   | 1.041  | 8.595  | 6.103  | 0.000 | 0.000 | 8.255 |
| KIAA1958  | -1.094 | 10.002 | -6.091 | 0.000 | 0.000 | 8.209 |
| GUCY1A3   | 1.405  | 9.608  | 6.086  | 0.000 | 0.000 | 8.190 |
| SCARA5    | -1.284 | 9.553  | -6.077 | 0.000 | 0.000 | 8.155 |
| SLC9A3    | -2.045 | 10.197 | -6.074 | 0.000 | 0.000 | 8.143 |
| SUSD4     | -1.020 | 9.092  | -6.071 | 0.000 | 0.000 | 8.129 |
| SOCS3     | 1.570  | 11.036 | 6.067  | 0.000 | 0.000 | 8.115 |
| AC011498. | -1.053 | 8.452  | -6.064 | 0.000 | 0.000 | 8.102 |
| FOXA1     | -1.592 | 10.446 | -6.050 | 0.000 | 0.000 | 8.048 |
| STRA6     | 1.289  | 8.361  | 6.047  | 0.000 | 0.000 | 8.034 |
| ITPKA     | -1.007 | 9.563  | -6.039 | 0.000 | 0.000 | 8.005 |
| ADTRP     | -1.565 | 10.306 | -6.036 | 0.000 | 0.000 | 7.993 |
| PPP2R3A   | -1.116 | 9.770  | -6.032 | 0.000 | 0.000 | 7.977 |
| ADAM19    | 1.314  | 10.011 | 6.024  | 0.000 | 0.000 | 7.945 |
| ST6GALNAC | -1.619 | 11.151 | -6.008 | 0.000 | 0.000 | 7.879 |
| MT-ND3    | -1.121 | 16.571 | -6.007 | 0.000 | 0.000 | 7.876 |
| TMEM125   | -1.126 | 9.847  | -5.997 | 0.000 | 0.000 | 7.835 |
| FAM83F    | -1.072 | 10.088 | -5.992 | 0.000 | 0.000 | 7.816 |

|          |        |        |        |       |       |       |
|----------|--------|--------|--------|-------|-------|-------|
| COL12A1  | 1.892  | 11.293 | 5.984  | 0.000 | 0.000 | 7.786 |
| NKX6-2   | -1.687 | 8.927  | -5.977 | 0.000 | 0.000 | 7.757 |
| C9orf152 | -1.421 | 10.829 | -5.974 | 0.000 | 0.000 | 7.744 |
| DPT      | -1.615 | 10.584 | -5.960 | 0.000 | 0.000 | 7.691 |
| ODAM     | -1.178 | 8.824  | -5.946 | 0.000 | 0.000 | 7.637 |
| CDH11    | 1.338  | 10.526 | 5.942  | 0.000 | 0.000 | 7.618 |
| MMP11    | 1.298  | 9.223  | 5.941  | 0.000 | 0.000 | 7.617 |
| TFPI2    | 1.011  | 8.333  | 5.928  | 0.000 | 0.000 | 7.563 |
| ACTN1    | 1.069  | 12.216 | 5.923  | 0.000 | 0.000 | 7.546 |
| ANKRD22  | -1.401 | 10.643 | -5.923 | 0.000 | 0.000 | 7.545 |
| RAP1GAP2 | -1.292 | 11.050 | -5.920 | 0.000 | 0.000 | 7.532 |
| HTRA3    | 1.217  | 10.381 | 5.913  | 0.000 | 0.000 | 7.505 |
| FAM177B  | -1.391 | 9.409  | -5.902 | 0.000 | 0.000 | 7.460 |
| GUCA2B   | -1.170 | 8.191  | -5.899 | 0.000 | 0.000 | 7.450 |
| ANGPTL2  | 1.119  | 10.445 | 5.898  | 0.000 | 0.000 | 7.448 |
| C1S      | 1.385  | 12.521 | 5.894  | 0.000 | 0.000 | 7.431 |
| SFRP4    | 2.226  | 9.887  | 5.893  | 0.000 | 0.000 | 7.425 |
| GREM1    | 1.686  | 12.271 | 5.882  | 0.000 | 0.000 | 7.384 |
| HDC      | -1.415 | 9.961  | -5.878 | 0.000 | 0.000 | 7.366 |
| SH3RF2   | -1.437 | 10.854 | -5.877 | 0.000 | 0.000 | 7.362 |
| PIK3AP1  | 1.085  | 10.106 | 5.877  | 0.000 | 0.000 | 7.362 |
| PLCXD3   | -1.349 | 9.094  | -5.868 | 0.000 | 0.000 | 7.328 |
| DIO2     | 1.219  | 10.381 | 5.867  | 0.000 | 0.000 | 7.323 |
| TCEA3    | -1.341 | 11.347 | -5.864 | 0.000 | 0.000 | 7.311 |
| KCNJ16   | -1.734 | 8.967  | -5.863 | 0.000 | 0.000 | 7.310 |
| OSM      | 1.025  | 8.342  | 5.857  | 0.000 | 0.000 | 7.284 |
| ENPP5    | -1.098 | 9.055  | -5.848 | 0.000 | 0.000 | 7.249 |
| PTGS2    | 1.296  | 9.172  | 5.847  | 0.000 | 0.000 | 7.247 |
| BHLHE40  | 1.138  | 11.647 | 5.847  | 0.000 | 0.000 | 7.245 |
| RFLNA    | -1.615 | 10.878 | -5.845 | 0.000 | 0.000 | 7.237 |
| MT-ND5   | -1.028 | 17.052 | -5.842 | 0.000 | 0.000 | 7.225 |
| PLAUR    | 1.070  | 10.136 | 5.842  | 0.000 | 0.000 | 7.225 |
| IL11     | 1.088  | 8.248  | 5.839  | 0.000 | 0.000 | 7.215 |
| SERPINA5 | -1.889 | 9.693  | -5.833 | 0.000 | 0.000 | 7.190 |
| COL10A1  | 1.951  | 8.842  | 5.829  | 0.000 | 0.000 | 7.177 |
| CCKBR    | -1.976 | 9.416  | -5.823 | 0.000 | 0.000 | 7.152 |
| B4GALNT2 | -1.762 | 8.808  | -5.812 | 0.000 | 0.000 | 7.107 |
| MECOM    | -1.087 | 12.011 | -5.802 | 0.000 | 0.000 | 7.068 |
| NOTCH3   | 1.291  | 11.083 | 5.798  | 0.000 | 0.000 | 7.054 |
| PTPRN2   | -1.206 | 10.948 | -5.797 | 0.000 | 0.000 | 7.050 |
| AKR1C2   | -1.788 | 10.710 | -5.794 | 0.000 | 0.000 | 7.038 |
| CCND2    | 1.214  | 11.255 | 5.787  | 0.000 | 0.000 | 7.012 |
| FGA      | -2.266 | 9.651  | -5.779 | 0.000 | 0.000 | 6.979 |
| SMIM22   | -1.278 | 10.906 | -5.773 | 0.000 | 0.000 | 6.958 |
| EMILIN1  | 1.114  | 11.555 | 5.769  | 0.000 | 0.000 | 6.941 |
| VCAM1    | 1.210  | 10.344 | 5.765  | 0.000 | 0.000 | 6.927 |
| CLDN18   | -2.562 | 13.099 | -5.758 | 0.000 | 0.000 | 6.899 |
| RPRM     | -1.100 | 8.468  | -5.757 | 0.000 | 0.000 | 6.895 |
| CDC42EP1 | -1.192 | 12.273 | -5.740 | 0.000 | 0.000 | 6.829 |
| COL7A1   | 1.537  | 10.372 | 5.740  | 0.000 | 0.000 | 6.828 |

|          |        |        |        |       |       |       |
|----------|--------|--------|--------|-------|-------|-------|
| C6orf132 | -1.168 | 11.160 | -5.728 | 0.000 | 0.000 | 6.782 |
| WNT2     | 1.260  | 8.181  | 5.723  | 0.000 | 0.000 | 6.762 |
| ANTXR1   | 1.477  | 11.412 | 5.723  | 0.000 | 0.000 | 6.762 |
| CD163    | 1.162  | 10.646 | 5.721  | 0.000 | 0.000 | 6.752 |
| ADAM12   | 1.268  | 8.887  | 5.713  | 0.000 | 0.000 | 6.724 |
| CYP3A5   | -1.689 | 12.034 | -5.712 | 0.000 | 0.000 | 6.718 |
| TUBB3    | 1.011  | 8.602  | 5.706  | 0.000 | 0.000 | 6.695 |
| SCIN     | -1.207 | 9.797  | -5.699 | 0.000 | 0.000 | 6.669 |
| CSF3R    | 1.191  | 9.526  | 5.697  | 0.000 | 0.000 | 6.659 |
| ANXA1    | 1.078  | 11.713 | 5.690  | 0.000 | 0.000 | 6.633 |
| SERPINE2 | 1.185  | 10.111 | 5.681  | 0.000 | 0.000 | 6.598 |
| CYP4X1   | -1.085 | 9.405  | -5.667 | 0.000 | 0.000 | 6.544 |
| ARSD     | -1.118 | 11.751 | -5.666 | 0.000 | 0.000 | 6.542 |
| GBP1     | 1.092  | 11.127 | 5.659  | 0.000 | 0.000 | 6.513 |
| FOLR1    | -1.654 | 9.443  | -5.646 | 0.000 | 0.000 | 6.462 |
| CKM      | -1.803 | 8.886  | -5.641 | 0.000 | 0.000 | 6.443 |
| LAPTM5   | 1.232  | 12.347 | 5.633  | 0.000 | 0.000 | 6.412 |
| FSCN1    | 1.026  | 10.320 | 5.632  | 0.000 | 0.000 | 6.408 |
| GRIN2D   | 1.112  | 8.600  | 5.629  | 0.000 | 0.000 | 6.398 |
| MAOA     | -1.078 | 11.108 | -5.627 | 0.000 | 0.000 | 6.390 |
| DUSP19   | -1.114 | 9.285  | -5.620 | 0.000 | 0.000 | 6.364 |
| LEPR     | -1.375 | 10.182 | -5.614 | 0.000 | 0.000 | 6.340 |
| ADH1B    | -1.610 | 10.497 | -5.605 | 0.000 | 0.000 | 6.305 |
| GSTA2    | -1.269 | 8.752  | -5.598 | 0.000 | 0.000 | 6.278 |
| KIAA0895 | -1.131 | 9.803  | -5.595 | 0.000 | 0.000 | 6.264 |
| SPON2    | 1.087  | 11.011 | 5.595  | 0.000 | 0.000 | 6.264 |
| SKIL     | 1.046  | 11.009 | 5.595  | 0.000 | 0.000 | 6.264 |
| CPXM1    | 1.263  | 9.061  | 5.594  | 0.000 | 0.000 | 6.260 |
| TGM2     | 1.409  | 12.032 | 5.590  | 0.000 | 0.000 | 6.247 |
| SNTB1    | -1.101 | 10.732 | -5.588 | 0.000 | 0.000 | 6.239 |
| C1QC     | 1.071  | 11.450 | 5.581  | 0.000 | 0.000 | 6.211 |
| GEM      | 1.163  | 9.963  | 5.580  | 0.000 | 0.000 | 6.208 |
| KRT17    | 1.411  | 8.398  | 5.579  | 0.000 | 0.000 | 6.204 |
| C2CD4B   | -1.177 | 9.884  | -5.576 | 0.000 | 0.000 | 6.194 |
| SCTR     | -1.061 | 8.646  | -5.571 | 0.000 | 0.000 | 6.172 |
| ALDH1A3  | 1.050  | 10.372 | 5.565  | 0.000 | 0.000 | 6.149 |
| CAMSAP3  | -1.120 | 10.709 | -5.556 | 0.000 | 0.000 | 6.114 |
| MLPH     | -1.577 | 12.207 | -5.554 | 0.000 | 0.000 | 6.109 |
| DPCR1    | -2.840 | 11.657 | -5.550 | 0.000 | 0.000 | 6.092 |
| TRPV6    | -1.030 | 8.771  | -5.545 | 0.000 | 0.000 | 6.071 |
| SELL     | 1.042  | 9.443  | 5.533  | 0.000 | 0.000 | 6.025 |
| C1R      | 1.098  | 12.775 | 5.520  | 0.000 | 0.000 | 5.978 |
| FER1L6   | -1.358 | 9.686  | -5.504 | 0.000 | 0.000 | 5.914 |
| CYFIP2   | -1.132 | 10.891 | -5.502 | 0.000 | 0.000 | 5.908 |
| AQP9     | 1.067  | 8.542  | 5.500  | 0.000 | 0.000 | 5.902 |
| SLC22A23 | -1.162 | 11.328 | -5.499 | 0.000 | 0.000 | 5.895 |
| MAP3K21  | -1.022 | 10.365 | -5.493 | 0.000 | 0.000 | 5.873 |
| LTF      | -2.707 | 11.892 | -5.492 | 0.000 | 0.000 | 5.868 |
| XK       | -1.014 | 9.902  | -5.486 | 0.000 | 0.000 | 5.845 |
| CTSK     | 1.212  | 11.454 | 5.483  | 0.000 | 0.000 | 5.834 |

|          |        |        |        |       |       |       |
|----------|--------|--------|--------|-------|-------|-------|
| MMP12    | 1.869  | 9.411  | 5.481  | 0.000 | 0.000 | 5.828 |
| SULT1A1  | -1.020 | 10.647 | -5.462 | 0.000 | 0.000 | 5.755 |
| SMPD3    | -1.346 | 10.774 | -5.454 | 0.000 | 0.000 | 5.726 |
| NDRG1    | -1.003 | 13.024 | -5.453 | 0.000 | 0.000 | 5.722 |
| CFD      | -1.452 | 10.813 | -5.450 | 0.000 | 0.000 | 5.707 |
| OXCT1    | -1.007 | 11.071 | -5.448 | 0.000 | 0.000 | 5.702 |
| CXCL8    | 2.149  | 10.118 | 5.445  | 0.000 | 0.000 | 5.690 |
| ATP8B1   | -1.141 | 12.151 | -5.445 | 0.000 | 0.000 | 5.690 |
| CXCL1    | 1.620  | 9.912  | 5.445  | 0.000 | 0.000 | 5.688 |
| NQO1     | -1.404 | 12.599 | -5.441 | 0.000 | 0.000 | 5.674 |
| SOD2     | 1.077  | 11.243 | 5.441  | 0.000 | 0.000 | 5.674 |
| MMP9     | 1.581  | 9.672  | 5.441  | 0.000 | 0.000 | 5.673 |
| KCNAB2   | 1.034  | 9.723  | 5.437  | 0.000 | 0.000 | 5.659 |
| SLC16A7  | -1.358 | 9.119  | -5.436 | 0.000 | 0.000 | 5.656 |
| SPOCK1   | 1.295  | 9.203  | 5.425  | 0.000 | 0.000 | 5.612 |
| FBN1     | 1.431  | 11.033 | 5.419  | 0.000 | 0.000 | 5.589 |
| GPBR1    | -1.190 | 9.070  | -5.417 | 0.000 | 0.000 | 5.582 |
| COL6A2   | 1.008  | 13.536 | 5.411  | 0.000 | 0.000 | 5.559 |
| HID1     | -1.049 | 12.062 | -5.409 | 0.000 | 0.000 | 5.550 |
| MMP3     | 1.665  | 9.017  | 5.406  | 0.000 | 0.000 | 5.540 |
| BCL2A1   | 1.090  | 9.059  | 5.353  | 0.000 | 0.000 | 5.340 |
| MCAM     | 1.008  | 11.460 | 5.338  | 0.000 | 0.000 | 5.282 |
| SLC11A1  | 1.084  | 8.881  | 5.327  | 0.000 | 0.000 | 5.241 |
| NRP2     | 1.203  | 10.128 | 5.326  | 0.000 | 0.000 | 5.238 |
| TRNP1    | -1.522 | 11.321 | -5.326 | 0.000 | 0.000 | 5.238 |
| IL6      | 1.067  | 8.364  | 5.324  | 0.000 | 0.000 | 5.229 |
| LRRK1    | 1.008  | 9.959  | 5.309  | 0.000 | 0.000 | 5.171 |
| MT1H     | -1.405 | 9.398  | -5.285 | 0.000 | 0.000 | 5.083 |
| FBP1     | -1.210 | 11.392 | -5.284 | 0.000 | 0.000 | 5.079 |
| C1orf115 | -1.117 | 10.695 | -5.279 | 0.000 | 0.000 | 5.060 |
| AADAC    | -1.500 | 9.812  | -5.245 | 0.000 | 0.000 | 4.933 |
| SLC16A10 | -1.057 | 9.400  | -5.193 | 0.000 | 0.000 | 4.738 |
| AKR1C3   | -1.460 | 12.067 | -5.187 | 0.000 | 0.000 | 4.713 |
| ATP11A   | 1.011  | 9.617  | 5.181  | 0.000 | 0.000 | 4.691 |
| RNASE1   | -1.390 | 12.274 | -5.170 | 0.000 | 0.000 | 4.651 |
| MTMR11   | 1.019  | 10.299 | 5.168  | 0.000 | 0.000 | 4.644 |
| FOXA2    | -1.240 | 10.322 | -5.162 | 0.000 | 0.000 | 4.619 |
| VILL     | -1.257 | 11.414 | -5.157 | 0.000 | 0.000 | 4.602 |
| ORM2     | -1.372 | 9.247  | -5.137 | 0.000 | 0.000 | 4.529 |
| FGD4     | -1.344 | 11.239 | -5.137 | 0.000 | 0.000 | 4.527 |
| C2       | 1.045  | 10.235 | 5.132  | 0.000 | 0.000 | 4.511 |
| C1QB     | 1.025  | 11.727 | 5.127  | 0.000 | 0.000 | 4.489 |
| JCHAIN   | -2.088 | 14.332 | -5.112 | 0.000 | 0.000 | 4.434 |
| RAB27B   | -1.234 | 10.910 | -5.104 | 0.000 | 0.000 | 4.404 |
| FBXO32   | 1.032  | 10.456 | 5.100  | 0.000 | 0.000 | 4.389 |
| CYP2C9   | -1.336 | 9.704  | -5.098 | 0.000 | 0.000 | 4.383 |
| COL11A1  | 1.747  | 8.532  | 5.087  | 0.000 | 0.000 | 4.342 |
| CXCL10   | 1.292  | 9.555  | 5.083  | 0.000 | 0.000 | 4.327 |
| DPYSL3   | 1.193  | 11.505 | 5.082  | 0.000 | 0.000 | 4.323 |
| ATP1B1   | -1.186 | 14.048 | -5.076 | 0.000 | 0.000 | 4.300 |

|         |        |        |        |       |       |       |
|---------|--------|--------|--------|-------|-------|-------|
| CEMIP   | 1.584  | 8.677  | 5.072  | 0.000 | 0.000 | 4.285 |
| PI16    | -1.039 | 9.011  | -5.068 | 0.000 | 0.000 | 4.270 |
| ISLR    | 1.261  | 10.448 | 5.067  | 0.000 | 0.000 | 4.267 |
| SCG3    | -1.058 | 8.598  | -5.065 | 0.000 | 0.000 | 4.261 |
| ELK4    | 1.293  | 10.675 | 5.063  | 0.000 | 0.000 | 4.252 |
| CTSE    | -2.405 | 13.539 | -5.062 | 0.000 | 0.000 | 4.250 |
| IRF6    | -1.031 | 11.145 | -5.057 | 0.000 | 0.000 | 4.230 |
| ZBTB7C  | -1.059 | 9.548  | -5.053 | 0.000 | 0.000 | 4.217 |
| PI3     | 1.950  | 9.675  | 5.002  | 0.000 | 0.000 | 4.028 |
| SCNN1A  | -1.335 | 11.288 | -4.992 | 0.000 | 0.000 | 3.993 |
| PI15    | 1.270  | 8.796  | 4.986  | 0.000 | 0.000 | 3.970 |
| PDK4    | -1.190 | 11.353 | -4.978 | 0.000 | 0.000 | 3.938 |
| PLEK    | 1.097  | 10.212 | 4.963  | 0.000 | 0.000 | 3.886 |
| MMP2    | 1.218  | 12.243 | 4.941  | 0.000 | 0.000 | 3.805 |
| RARRES1 | 1.261  | 9.341  | 4.937  | 0.000 | 0.000 | 3.790 |
| SPDEF   | -1.279 | 10.175 | -4.914 | 0.000 | 0.000 | 3.706 |
| TST     | -1.009 | 11.344 | -4.912 | 0.000 | 0.000 | 3.700 |
| FLNA    | 1.060  | 13.693 | 4.910  | 0.000 | 0.000 | 3.691 |
| PTGER3  | -1.502 | 10.105 | -4.907 | 0.000 | 0.000 | 3.679 |
| PKD2    | 1.001  | 9.938  | 4.906  | 0.000 | 0.000 | 3.675 |
| THBS4   | 1.824  | 9.404  | 4.897  | 0.000 | 0.000 | 3.645 |
| CXCL9   | 1.495  | 10.072 | 4.884  | 0.000 | 0.000 | 3.595 |
| LIPG    | 1.048  | 9.316  | 4.881  | 0.000 | 0.000 | 3.586 |
| CD55    | 1.259  | 10.876 | 4.871  | 0.000 | 0.000 | 3.549 |
| SLC28A3 | 1.166  | 8.900  | 4.867  | 0.000 | 0.000 | 3.536 |
| HOXA10  | 1.073  | 8.499  | 4.865  | 0.000 | 0.000 | 3.525 |
| HEPH    | 1.300  | 10.086 | 4.856  | 0.000 | 0.000 | 3.493 |
| GBP5    | 1.175  | 10.137 | 4.836  | 0.000 | 0.000 | 3.422 |
| PRSS8   | -1.366 | 11.920 | -4.828 | 0.000 | 0.000 | 3.394 |
| S100A9  | 1.660  | 10.346 | 4.817  | 0.000 | 0.000 | 3.353 |
| CDH2    | -1.086 | 9.207  | -4.785 | 0.000 | 0.000 | 3.237 |
| EMP1    | 1.218  | 11.166 | 4.779  | 0.000 | 0.000 | 3.217 |
| RNF128  | -1.118 | 11.118 | -4.779 | 0.000 | 0.000 | 3.215 |
| PRR15L  | -1.257 | 11.514 | -4.743 | 0.000 | 0.000 | 3.086 |
| REG1A   | -2.413 | 12.975 | -4.665 | 0.000 | 0.000 | 2.808 |
| MDK     | 1.126  | 11.597 | 4.644  | 0.000 | 0.000 | 2.732 |
| ALDOB   | -2.293 | 10.475 | -4.630 | 0.000 | 0.000 | 2.684 |
| CAPN8   | -1.689 | 12.053 | -4.628 | 0.000 | 0.000 | 2.676 |
| SLC12A2 | -1.017 | 12.713 | -4.626 | 0.000 | 0.000 | 2.671 |
| POU2AF1 | -1.256 | 11.208 | -4.611 | 0.000 | 0.000 | 2.617 |
| GALNT6  | -1.157 | 11.325 | -4.600 | 0.000 | 0.000 | 2.577 |
| B3GNT3  | -1.005 | 11.049 | -4.598 | 0.000 | 0.000 | 2.572 |
| S100P   | -1.775 | 12.981 | -4.587 | 0.000 | 0.000 | 2.534 |
| MUC1    | -1.248 | 12.652 | -4.586 | 0.000 | 0.000 | 2.530 |
| ACSM3   | -1.040 | 10.167 | -4.543 | 0.000 | 0.000 | 2.380 |
| LIPH    | -1.251 | 11.133 | -4.539 | 0.000 | 0.000 | 2.364 |
| PDE3A   | 1.201  | 9.413  | 4.518  | 0.000 | 0.000 | 2.290 |
| TPX2    | 1.051  | 10.334 | 4.516  | 0.000 | 0.000 | 2.283 |
| ERN2    | -1.270 | 11.221 | -4.504 | 0.000 | 0.000 | 2.242 |
| CHGB    | -1.293 | 9.158  | -4.489 | 0.000 | 0.000 | 2.188 |



|           |        |        |        |       |       |        |
|-----------|--------|--------|--------|-------|-------|--------|
| CENPF     | 1.028  | 10.662 | 4.445  | 0.000 | 0.000 | 2.036  |
| CXADR     | -1.148 | 11.015 | -4.421 | 0.000 | 0.000 | 1.953  |
| UBE2C     | 1.018  | 9.976  | 4.412  | 0.000 | 0.000 | 1.923  |
| KLK6      | 1.066  | 8.044  | 4.390  | 0.000 | 0.000 | 1.849  |
| S100A8    | 1.197  | 9.482  | 4.384  | 0.000 | 0.000 | 1.828  |
| CYP2C18   | -1.349 | 10.150 | -4.357 | 0.000 | 0.000 | 1.734  |
| GABRE     | 1.032  | 9.589  | 4.322  | 0.000 | 0.000 | 1.614  |
| AQP1      | 1.056  | 11.574 | 4.322  | 0.000 | 0.000 | 1.614  |
| PRDM16    | -1.004 | 9.506  | -4.306 | 0.000 | 0.000 | 1.559  |
| AGT       | 1.035  | 9.530  | 4.275  | 0.000 | 0.000 | 1.455  |
| NBPF12    | -1.093 | 11.211 | -4.274 | 0.000 | 0.000 | 1.450  |
| MS4A8     | -1.037 | 9.168  | -4.258 | 0.000 | 0.000 | 1.399  |
| EPHB2     | 1.185  | 9.461  | 4.258  | 0.000 | 0.000 | 1.399  |
| COMP      | 1.084  | 8.416  | 4.236  | 0.000 | 0.000 | 1.323  |
| B3GNT7    | -1.046 | 10.590 | -4.215 | 0.000 | 0.000 | 1.252  |
| TJP3      | -1.011 | 10.975 | -4.199 | 0.000 | 0.000 | 1.199  |
| IFI6      | 1.063  | 11.359 | 4.185  | 0.000 | 0.000 | 1.151  |
| FOXQ1     | -1.206 | 11.552 | -4.172 | 0.000 | 0.000 | 1.109  |
| MXRA5     | 1.030  | 11.341 | 4.161  | 0.000 | 0.000 | 1.073  |
| HOXA13    | 1.014  | 8.247  | 4.155  | 0.000 | 0.000 | 1.052  |
| CLU       | -1.102 | 12.546 | -4.150 | 0.000 | 0.000 | 1.036  |
| FGG       | -1.383 | 8.797  | -4.135 | 0.000 | 0.000 | 0.985  |
| C3        | 1.254  | 12.543 | 4.129  | 0.000 | 0.001 | 0.967  |
| CLDN7     | 1.505  | 10.136 | 4.111  | 0.000 | 0.001 | 0.908  |
| TSPAN1    | -1.503 | 11.985 | -4.102 | 0.000 | 0.001 | 0.877  |
| CXCL14    | -1.311 | 11.555 | -4.089 | 0.000 | 0.001 | 0.835  |
| TRIM29    | 1.277  | 8.775  | 4.087  | 0.000 | 0.001 | 0.827  |
| ITGA11    | 1.013  | 9.536  | 4.086  | 0.000 | 0.001 | 0.824  |
| DAZ1      | -1.551 | 9.231  | -4.073 | 0.000 | 0.001 | 0.780  |
| CAMK2N1   | 1.013  | 10.803 | 4.039  | 0.000 | 0.001 | 0.668  |
| MMP1      | 1.251  | 11.010 | 4.037  | 0.000 | 0.001 | 0.662  |
| AGR2      | -1.657 | 14.659 | -3.992 | 0.000 | 0.001 | 0.516  |
| MSMB      | -1.618 | 9.996  | -3.989 | 0.000 | 0.001 | 0.506  |
| UBD       | 1.417  | 11.026 | 3.984  | 0.000 | 0.001 | 0.491  |
| LAMC2     | 1.206  | 10.608 | 3.984  | 0.000 | 0.001 | 0.489  |
| MAGEA3    | 1.044  | 7.964  | 3.876  | 0.000 | 0.001 | 0.143  |
| KRT20     | -1.823 | 10.705 | -3.833 | 0.000 | 0.001 | 0.008  |
| LUM       | 1.142  | 12.879 | 3.812  | 0.000 | 0.001 | -0.059 |
| MMP7      | 1.531  | 9.708  | 3.803  | 0.000 | 0.001 | -0.088 |
| HRASLS2   | -1.152 | 9.242  | -3.786 | 0.000 | 0.001 | -0.142 |
| AL645922. | 1.113  | 8.482  | 3.775  | 0.000 | 0.001 | -0.175 |
| TSPAN8    | -1.379 | 13.177 | -3.757 | 0.000 | 0.001 | -0.232 |
| PHGR1     | -1.573 | 10.729 | -3.754 | 0.000 | 0.002 | -0.240 |
| RGS1      | 1.041  | 11.189 | 3.748  | 0.000 | 0.002 | -0.261 |
| CLDN3     | 1.448  | 9.468  | 3.734  | 0.000 | 0.002 | -0.304 |
| CEACAM6   | 2.009  | 10.851 | 3.724  | 0.000 | 0.002 | -0.334 |
| CEACAM7   | 1.020  | 8.460  | 3.687  | 0.000 | 0.002 | -0.449 |
| FXYD3     | -1.215 | 12.608 | -3.683 | 0.000 | 0.002 | -0.462 |
| ONECUT2   | 1.242  | 9.469  | 3.673  | 0.000 | 0.002 | -0.494 |
| PLEKHS1   | 1.260  | 9.743  | 3.660  | 0.000 | 0.002 | -0.534 |

|           |        |        |        |       |       |        |
|-----------|--------|--------|--------|-------|-------|--------|
| A4GNT     | -1.045 | 9.005  | -3.651 | 0.000 | 0.002 | -0.561 |
| SERPINB5  | 1.318  | 9.514  | 3.472  | 0.001 | 0.003 | -1.100 |
| SPINK1    | -1.417 | 13.005 | -3.470 | 0.001 | 0.003 | -1.105 |
| MGAM2     | 1.021  | 8.829  | 3.430  | 0.001 | 0.004 | -1.223 |
| CLDN4     | 1.421  | 10.020 | 3.411  | 0.001 | 0.004 | -1.279 |
| C6orf58   | -1.618 | 9.563  | -3.374 | 0.001 | 0.004 | -1.386 |
| DAZ2      | -1.459 | 9.204  | -3.321 | 0.001 | 0.005 | -1.537 |
| FCGBP     | -1.536 | 12.321 | -3.318 | 0.001 | 0.005 | -1.547 |
| HKDC1     | 1.095  | 9.210  | 3.259  | 0.002 | 0.006 | -1.714 |
| PLA2G2A   | 1.137  | 9.418  | 3.213  | 0.002 | 0.006 | -1.845 |
| OLFM4     | 2.268  | 11.366 | 3.196  | 0.002 | 0.007 | -1.891 |
| DUOX2     | -1.277 | 10.720 | -3.125 | 0.003 | 0.008 | -2.086 |
| TMEM189-t | 1.075  | 9.068  | 3.104  | 0.003 | 0.009 | -2.145 |
| AP002990. | 1.367  | 11.166 | 2.930  | 0.005 | 0.013 | -2.610 |
| CXCL5     | 1.403  | 10.448 | 2.876  | 0.005 | 0.015 | -2.748 |
| TCN1      | -1.124 | 10.601 | -2.851 | 0.006 | 0.016 | -2.813 |
| APOA1     | -1.125 | 9.013  | -2.849 | 0.006 | 0.016 | -2.817 |
| CDH17     | 1.431  | 9.791  | 2.820  | 0.006 | 0.017 | -2.891 |
| REG3A     | -1.553 | 10.828 | -2.771 | 0.007 | 0.019 | -3.013 |
| KRT19     | -1.092 | 13.410 | -2.746 | 0.008 | 0.020 | -3.076 |
| DMBT1     | 1.654  | 10.795 | 2.723  | 0.008 | 0.021 | -3.133 |

**Table S3. Differential expression of genes in GSE40634**

| Symbol    | logFC  | AveExpr | t       | P. Value | adj. P. Val | B      |
|-----------|--------|---------|---------|----------|-------------|--------|
| Nid1      | 5.833  | 7.156   | 42.638  | 0.000    | 0.000       | 33.915 |
| Ctgf      | 8.550  | 8.725   | 38.712  | 0.000    | 0.000       | 32.593 |
| Col5a2    | 7.213  | 7.595   | 36.043  | 0.000    | 0.000       | 31.573 |
| Colla2    | 7.309  | 7.851   | 31.729  | 0.000    | 0.000       | 29.670 |
| F2r       | 7.371  | 8.929   | 25.892  | 0.000    | 0.000       | 26.460 |
| Bgn       | 5.928  | 8.939   | 24.840  | 0.000    | 0.000       | 25.784 |
| Fbln2     | 6.865  | 8.661   | 23.935  | 0.000    | 0.000       | 25.175 |
| Ecml      | 6.342  | 8.635   | 23.799  | 0.000    | 0.000       | 25.081 |
| Lhfp      | 6.102  | 6.808   | 23.739  | 0.000    | 0.000       | 25.039 |
| Ltbp3     | 5.621  | 7.368   | 23.611  | 0.000    | 0.000       | 24.950 |
| Plat      | 6.875  | 7.593   | 23.280  | 0.000    | 0.000       | 24.716 |
| Postn     | 5.984  | 7.785   | 22.729  | 0.000    | 0.000       | 24.319 |
| Chi3l3    | 7.899  | 8.260   | 22.543  | 0.000    | 0.000       | 24.182 |
| Tubb2b    | 4.884  | 6.591   | 22.131  | 0.000    | 0.000       | 23.875 |
| 2610203C2 | 6.735  | 6.943   | 21.971  | 0.000    | 0.000       | 23.753 |
| Fstl1     | 5.971  | 7.848   | 21.540  | 0.000    | 0.000       | 23.422 |
| Runx2     | 3.828  | 5.427   | 21.466  | 0.000    | 0.000       | 23.364 |
| Lamb1-1   | 5.229  | 6.234   | 21.339  | 0.000    | 0.000       | 23.265 |
| Fam102b   | 4.691  | 7.779   | 20.981  | 0.000    | 0.000       | 22.981 |
| Igfbp3    | 6.870  | 8.390   | 20.516  | 0.000    | 0.000       | 22.604 |
| Sphk1     | 4.400  | 6.150   | 20.357  | 0.000    | 0.000       | 22.473 |
| Trf       | 6.776  | 7.826   | 20.029  | 0.000    | 0.000       | 22.199 |
| Col6a3    | 5.414  | 6.944   | 19.864  | 0.000    | 0.000       | 22.059 |
| Stx2      | 3.283  | 5.699   | 19.620  | 0.000    | 0.000       | 21.849 |
| Serpina6  | 5.789  | 6.872   | 19.443  | 0.000    | 0.000       | 21.696 |
| Serpine2  | 6.098  | 7.596   | 19.224  | 0.000    | 0.000       | 21.505 |
| Schipl    | 4.313  | 6.171   | 19.011  | 0.000    | 0.000       | 21.316 |
| Ints6     | 4.532  | 7.031   | 19.007  | 0.000    | 0.000       | 21.312 |
| Cdh13     | 4.219  | 6.726   | 18.981  | 0.000    | 0.000       | 21.289 |
| Gpc1      | 3.864  | 6.126   | 18.781  | 0.000    | 0.000       | 21.110 |
| Col4a1    | 4.615  | 7.119   | 18.722  | 0.000    | 0.000       | 21.056 |
| Pgc       | -8.693 | 6.497   | -18.651 | 0.000    | 0.000       | 20.992 |
| Gif       | -8.524 | 6.536   | -18.559 | 0.000    | 0.000       | 20.907 |
| Colla1    | 4.909  | 6.526   | 18.427  | 0.000    | 0.000       | 20.787 |
| Glis2     | 4.616  | 6.204   | 18.344  | 0.000    | 0.000       | 20.710 |
| Pla2g1b   | -7.200 | 6.382   | -18.132 | 0.000    | 0.000       | 20.513 |
| Chia      | -7.897 | 5.968   | -18.100 | 0.000    | 0.000       | 20.483 |
| Olfml3    | 4.533  | 6.325   | 18.057  | 0.000    | 0.000       | 20.442 |
| Msln      | 7.135  | 7.973   | 18.047  | 0.000    | 0.000       | 20.432 |
| Cep170    | 4.283  | 5.457   | 17.954  | 0.000    | 0.000       | 20.345 |
| Cd302     | 4.352  | 6.813   | 17.822  | 0.000    | 0.000       | 20.219 |
| Sparc     | 6.238  | 9.022   | 17.782  | 0.000    | 0.000       | 20.181 |
| Cd68      | 4.478  | 6.495   | 17.522  | 0.000    | 0.000       | 19.931 |
| Osmr      | 4.911  | 6.014   | 17.444  | 0.000    | 0.000       | 19.855 |
| Mmd       | 6.031  | 7.443   | 17.438  | 0.000    | 0.000       | 19.848 |
| Ptpre     | 3.795  | 6.453   | 17.379  | 0.000    | 0.000       | 19.791 |
| Flna      | 5.059  | 8.296   | 17.375  | 0.000    | 0.000       | 19.787 |

|           |        |       |         |       |       |        |
|-----------|--------|-------|---------|-------|-------|--------|
| Fn1       | 6.780  | 9.602 | 17.352  | 0.000 | 0.000 | 19.764 |
| Gast      | -8.955 | 6.171 | -17.337 | 0.000 | 0.000 | 19.750 |
| Samd4     | 3.977  | 5.766 | 17.334  | 0.000 | 0.000 | 19.747 |
| Pga5      | -6.048 | 5.402 | -17.330 | 0.000 | 0.000 | 19.743 |
| Cfh       | 4.216  | 6.699 | 17.228  | 0.000 | 0.000 | 19.642 |
| Tubb6     | 5.308  | 7.401 | 17.213  | 0.000 | 0.000 | 19.628 |
| Chrnbl    | 3.595  | 6.579 | 17.093  | 0.000 | 0.000 | 19.509 |
| Adamts12  | 3.728  | 5.677 | 17.066  | 0.000 | 0.000 | 19.481 |
| Fcgr3     | 5.808  | 7.350 | 16.936  | 0.000 | 0.000 | 19.352 |
| Cald1     | 5.398  | 6.033 | 16.841  | 0.000 | 0.000 | 19.256 |
| Chst11    | 3.826  | 6.607 | 16.793  | 0.000 | 0.000 | 19.208 |
| Abcb1a    | 5.576  | 6.478 | 16.769  | 0.000 | 0.000 | 19.183 |
| Hivep2    | 3.406  | 5.366 | 16.547  | 0.000 | 0.000 | 18.956 |
| Pxdn      | 4.774  | 6.631 | 16.509  | 0.000 | 0.000 | 18.916 |
| St3gal4   | 3.597  | 6.554 | 16.441  | 0.000 | 0.000 | 18.847 |
| Fam176b   | 3.634  | 6.660 | 16.436  | 0.000 | 0.000 | 18.841 |
| Mpeg1     | 4.317  | 7.454 | 16.420  | 0.000 | 0.000 | 18.825 |
| LOC100047 | 5.816  | 6.989 | 16.294  | 0.000 | 0.000 | 18.694 |
| Emp3      | 5.043  | 8.267 | 16.265  | 0.000 | 0.000 | 18.663 |
| Tnc       | 6.282  | 7.165 | 16.259  | 0.000 | 0.000 | 18.657 |
| Cd93      | 3.873  | 5.941 | 15.990  | 0.000 | 0.000 | 18.373 |
| Zeb1      | 3.733  | 6.437 | 15.949  | 0.000 | 0.000 | 18.330 |
| Bicc1     | 5.164  | 6.574 | 15.914  | 0.000 | 0.000 | 18.292 |
| Tgm2      | 4.876  | 7.607 | 15.901  | 0.000 | 0.000 | 18.278 |
| 1300014IC | 4.361  | 6.259 | 15.897  | 0.000 | 0.000 | 18.274 |
| Mrc1      | 6.012  | 7.034 | 15.826  | 0.000 | 0.000 | 18.197 |
| Pdia2     | -6.645 | 5.701 | -15.731 | 0.000 | 0.000 | 18.095 |
| Es22      | -2.710 | 3.702 | -15.678 | 0.000 | 0.000 | 18.038 |
| Tspan4    | 4.426  | 7.837 | 15.642  | 0.000 | 0.000 | 17.999 |
| Fscn1     | 6.575  | 8.634 | 15.592  | 0.000 | 0.000 | 17.944 |
| Cxcl16    | 3.342  | 7.335 | 15.573  | 0.000 | 0.000 | 17.924 |
| Rnf24     | 2.582  | 6.246 | 15.531  | 0.000 | 0.000 | 17.877 |
| Cul7      | 3.235  | 6.476 | 15.521  | 0.000 | 0.000 | 17.867 |
| Tnfrsf12ε | 3.438  | 9.781 | 15.446  | 0.000 | 0.000 | 17.784 |
| Rhoc      | 4.829  | 7.790 | 15.269  | 0.000 | 0.000 | 17.588 |
| Igfbp7    | 5.331  | 9.975 | 15.257  | 0.000 | 0.000 | 17.575 |
| Gpr137b   | 3.261  | 7.080 | 15.155  | 0.000 | 0.000 | 17.461 |
| Gpr137b-1 | 3.683  | 7.364 | 15.146  | 0.000 | 0.000 | 17.450 |
| Jub       | 3.958  | 7.101 | 15.101  | 0.000 | 0.000 | 17.400 |
| Clcf1     | 4.497  | 6.374 | 15.067  | 0.000 | 0.000 | 17.362 |
| Serpine1  | 5.749  | 6.796 | 15.024  | 0.000 | 0.000 | 17.314 |
| C230081A1 | 4.506  | 7.278 | 14.920  | 0.000 | 0.000 | 17.196 |
| Bcl11a    | -2.902 | 4.652 | -14.905 | 0.000 | 0.000 | 17.178 |
| Col6a1    | 4.364  | 6.792 | 14.897  | 0.000 | 0.000 | 17.169 |
| Afap1     | 3.197  | 7.133 | 14.882  | 0.000 | 0.000 | 17.152 |
| Ncs1      | 3.292  | 5.216 | 14.819  | 0.000 | 0.000 | 17.080 |
| Loxl2     | 4.139  | 6.649 | 14.797  | 0.000 | 0.000 | 17.055 |
| Slc16a7   | -5.500 | 5.260 | -14.777 | 0.000 | 0.000 | 17.031 |
| Mgp       | 6.625  | 9.083 | 14.676  | 0.000 | 0.000 | 16.916 |
| Mtap7d1   | 4.112  | 7.415 | 14.664  | 0.000 | 0.000 | 16.902 |

|           |        |        |         |       |       |        |
|-----------|--------|--------|---------|-------|-------|--------|
| Pcolce    | 5.427  | 8.631  | 14.628  | 0.000 | 0.000 | 16.860 |
| Otud7b    | 1.937  | 6.589  | 14.587  | 0.000 | 0.000 | 16.813 |
| 3930401B1 | 2.794  | 10.893 | 14.489  | 0.000 | 0.000 | 16.698 |
| Marcks11  | 4.292  | 7.425  | 14.472  | 0.000 | 0.000 | 16.678 |
| Nav1      | 3.490  | 6.300  | 14.451  | 0.000 | 0.000 | 16.653 |
| Cmtm3     | 5.064  | 6.213  | 14.382  | 0.000 | 0.000 | 16.573 |
| Mmp2      | 5.292  | 6.785  | 14.374  | 0.000 | 0.000 | 16.563 |
| Pmp22     | 3.341  | 5.535  | 14.360  | 0.000 | 0.000 | 16.547 |
| Efemp2    | 4.128  | 6.914  | 14.169  | 0.000 | 0.000 | 16.320 |
| Cdh11     | 4.951  | 5.878  | 14.113  | 0.000 | 0.000 | 16.253 |
| Col4a2    | 5.343  | 7.666  | 14.041  | 0.000 | 0.000 | 16.166 |
| Atp4b     | -7.867 | 7.259  | -14.009 | 0.000 | 0.000 | 16.128 |
| Lgals1    | 4.738  | 10.238 | 13.971  | 0.000 | 0.000 | 16.082 |
| Gm14005   | 4.411  | 6.673  | 13.909  | 0.000 | 0.000 | 16.006 |
| Map4k4    | 3.343  | 6.686  | 13.863  | 0.000 | 0.000 | 15.950 |
| Spsb1     | 3.495  | 5.646  | 13.849  | 0.000 | 0.000 | 15.934 |
| Kctd20    | 2.301  | 6.133  | 13.804  | 0.000 | 0.000 | 15.879 |
| Cyplb1    | 4.549  | 6.644  | 13.737  | 0.000 | 0.000 | 15.797 |
| Fkbp7     | 3.686  | 6.792  | 13.716  | 0.000 | 0.000 | 15.771 |
| Wnt5a     | 4.252  | 5.583  | 13.715  | 0.000 | 0.000 | 15.770 |
| Inhba     | 3.549  | 7.321  | 13.685  | 0.000 | 0.000 | 15.733 |
| Slc43a3   | 3.381  | 6.194  | 13.559  | 0.000 | 0.000 | 15.577 |
| Farpl     | 3.350  | 6.998  | 13.546  | 0.000 | 0.000 | 15.560 |
| Hmga2     | 5.029  | 7.731  | 13.527  | 0.000 | 0.000 | 15.537 |
| Fkbp10    | 3.582  | 6.059  | 13.522  | 0.000 | 0.000 | 15.530 |
| Sst       | -5.751 | 5.427  | -13.514 | 0.000 | 0.000 | 15.521 |
| Mrps24    | -1.750 | 9.129  | -13.506 | 0.000 | 0.000 | 15.511 |
| Dpysl3    | 4.041  | 5.947  | 13.424  | 0.000 | 0.000 | 15.408 |
| Serping1  | 4.826  | 7.604  | 13.407  | 0.000 | 0.000 | 15.386 |
| Aldh1a2   | 3.897  | 5.101  | 13.384  | 0.000 | 0.000 | 15.357 |
| Fxyd5     | 4.717  | 7.601  | 13.365  | 0.000 | 0.000 | 15.333 |
| Timp1     | 5.407  | 8.090  | 13.317  | 0.000 | 0.000 | 15.273 |
| Lum       | 4.563  | 6.767  | 13.265  | 0.000 | 0.000 | 15.208 |
| Rras      | 3.719  | 7.835  | 13.260  | 0.000 | 0.000 | 15.201 |
| Slc12a4   | 3.186  | 6.324  | 13.166  | 0.000 | 0.000 | 15.081 |
| Saa3      | 5.670  | 7.300  | 13.143  | 0.000 | 0.000 | 15.052 |
| Pdgfc     | 3.975  | 6.962  | 13.125  | 0.000 | 0.000 | 15.029 |
| Relb      | 2.654  | 5.704  | 13.101  | 0.000 | 0.000 | 14.998 |
| Serpinb9  | 3.977  | 6.445  | 13.046  | 0.000 | 0.000 | 14.927 |
| Col18a1   | 3.651  | 6.753  | 13.041  | 0.000 | 0.000 | 14.921 |
| Pdlim2    | 3.218  | 6.101  | 13.023  | 0.000 | 0.000 | 14.898 |
| Plaur     | 4.094  | 8.196  | 12.943  | 0.000 | 0.000 | 14.794 |
| Adamts14  | 3.232  | 6.049  | 12.902  | 0.000 | 0.000 | 14.742 |
| Rbms1     | 2.256  | 9.692  | 12.901  | 0.000 | 0.000 | 14.740 |
| Ctla2a    | 5.432  | 8.654  | 12.898  | 0.000 | 0.000 | 14.736 |
| BC028528  | 2.979  | 4.842  | 12.871  | 0.000 | 0.000 | 14.701 |
| Ctla2a    | 6.064  | 7.573  | 12.864  | 0.000 | 0.000 | 14.692 |
| Clps      | -8.298 | 7.652  | -12.863 | 0.000 | 0.000 | 14.691 |
| Sulf1     | 3.164  | 5.227  | 12.854  | 0.000 | 0.000 | 14.679 |
| Pmepal    | 2.305  | 8.105  | 12.835  | 0.000 | 0.000 | 14.654 |

|           |        |        |         |       |       |        |
|-----------|--------|--------|---------|-------|-------|--------|
| Serpinf1  | 5.975  | 6.574  | 12.812  | 0.000 | 0.000 | 14.624 |
| Phxr4     | 2.561  | 5.727  | 12.811  | 0.000 | 0.000 | 14.623 |
| Snrpn     | -2.729 | 8.187  | -12.724 | 0.000 | 0.000 | 14.509 |
| Qk        | 4.347  | 6.099  | 12.720  | 0.000 | 0.000 | 14.503 |
| Gatm      | 3.925  | 5.879  | 12.692  | 0.000 | 0.000 | 14.466 |
| Lama5     | 3.646  | 7.136  | 12.686  | 0.000 | 0.000 | 14.458 |
| Ctss      | 5.418  | 9.184  | 12.680  | 0.000 | 0.000 | 14.451 |
| Col5a1    | 5.042  | 7.630  | 12.651  | 0.000 | 0.000 | 14.413 |
| Gab2      | 2.942  | 6.529  | 12.632  | 0.000 | 0.000 | 14.388 |
| Rasa3     | 3.690  | 6.683  | 12.603  | 0.000 | 0.000 | 14.349 |
| Anxa8     | 5.226  | 7.544  | 12.582  | 0.000 | 0.000 | 14.320 |
| Ptprm     | 2.464  | 5.233  | 12.516  | 0.000 | 0.000 | 14.233 |
| Anapc13   | -1.571 | 8.969  | -12.451 | 0.000 | 0.000 | 14.146 |
| Thy1      | 3.646  | 6.764  | 12.447  | 0.000 | 0.000 | 14.140 |
| Tmem184c  | 4.110  | 6.637  | 12.407  | 0.000 | 0.000 | 14.088 |
| Tmem119   | 3.383  | 5.105  | 12.397  | 0.000 | 0.000 | 14.074 |
| Wipfl     | 2.922  | 5.142  | 12.387  | 0.000 | 0.000 | 14.060 |
| Ctsk      | 3.496  | 6.311  | 12.346  | 0.000 | 0.000 | 14.005 |
| Wwtr1     | 3.324  | 6.356  | 12.334  | 0.000 | 0.000 | 13.989 |
| Apoe      | 5.299  | 9.076  | 12.313  | 0.000 | 0.000 | 13.960 |
| Ccr1      | 4.496  | 5.809  | 12.268  | 0.000 | 0.000 | 13.899 |
| Msn       | 5.484  | 9.109  | 12.260  | 0.000 | 0.000 | 13.888 |
| Tpbg      | 3.720  | 5.791  | 12.229  | 0.000 | 0.000 | 13.847 |
| Slco2b1   | 2.709  | 4.671  | 12.210  | 0.000 | 0.000 | 13.820 |
| Emilin1   | 2.893  | 5.234  | 12.187  | 0.000 | 0.000 | 13.789 |
| Myof      | 3.795  | 8.784  | 12.164  | 0.000 | 0.000 | 13.757 |
| Cxcr7     | 4.824  | 7.355  | 12.133  | 0.000 | 0.000 | 13.716 |
| Gm4586    | 4.073  | 10.032 | 12.094  | 0.000 | 0.000 | 13.662 |
| Sh3pxd2b  | 3.472  | 8.049  | 12.079  | 0.000 | 0.000 | 13.641 |
| Gngl1     | 2.983  | 7.264  | 12.078  | 0.000 | 0.000 | 13.639 |
| Fosl1     | 2.683  | 4.985  | 12.048  | 0.000 | 0.000 | 13.599 |
| Plec      | 2.511  | 9.229  | 12.020  | 0.000 | 0.000 | 13.559 |
| A430081F1 | 2.744  | 5.509  | 12.000  | 0.000 | 0.000 | 13.532 |
| Elov15    | 4.634  | 7.693  | 11.985  | 0.000 | 0.000 | 13.512 |
| 1810010DC | -7.191 | 5.794  | -11.974 | 0.000 | 0.000 | 13.495 |
| Ghr1      | -7.086 | 6.167  | -11.953 | 0.000 | 0.000 | 13.468 |
| Cp        | 6.005  | 8.436  | 11.946  | 0.000 | 0.000 | 13.457 |
| Slit2     | 3.831  | 5.761  | 11.939  | 0.000 | 0.000 | 13.448 |
| Jdp2      | 2.717  | 4.776  | 11.939  | 0.000 | 0.000 | 13.447 |
| 4632428NC | 3.484  | 5.578  | 11.914  | 0.000 | 0.000 | 13.413 |
| Clqb      | 5.518  | 7.342  | 11.907  | 0.000 | 0.000 | 13.403 |
| Syde1     | 2.231  | 4.807  | 11.900  | 0.000 | 0.000 | 13.394 |
| Ttc28     | 2.325  | 5.508  | 11.877  | 0.000 | 0.000 | 13.362 |
| 6330406I1 | 3.239  | 4.936  | 11.828  | 0.000 | 0.000 | 13.293 |
| Bcl2ala   | 4.838  | 6.832  | 11.796  | 0.000 | 0.000 | 13.248 |
| Atp4a     | -7.535 | 6.237  | -11.794 | 0.000 | 0.000 | 13.245 |
| Stom      | 2.735  | 6.073  | 11.791  | 0.000 | 0.000 | 13.241 |
| Lrrc8c    | 4.091  | 5.814  | 11.786  | 0.000 | 0.000 | 13.234 |
| Acsbg1    | 3.221  | 4.982  | 11.775  | 0.000 | 0.000 | 13.218 |
| Plekhg2   | 2.938  | 6.537  | 11.755  | 0.000 | 0.000 | 13.191 |

|           |        |        |         |       |       |        |
|-----------|--------|--------|---------|-------|-------|--------|
| I14ra     | 2.993  | 7.352  | 11.751  | 0.000 | 0.000 | 13.185 |
| Fndc1     | 3.667  | 5.982  | 11.721  | 0.000 | 0.000 | 13.143 |
| Gprc5b    | 3.143  | 7.133  | 11.713  | 0.000 | 0.000 | 13.132 |
| Fmnl3     | 2.236  | 5.282  | 11.704  | 0.000 | 0.000 | 13.118 |
| Mllt11    | 3.148  | 6.560  | 11.704  | 0.000 | 0.000 | 13.118 |
| Ms4a6d    | 4.262  | 5.134  | 11.700  | 0.000 | 0.000 | 13.113 |
| Vps18     | 1.897  | 4.732  | 11.690  | 0.000 | 0.000 | 13.098 |
| Ccl6      | 6.025  | 9.235  | 11.688  | 0.000 | 0.000 | 13.096 |
| Pkd2      | 2.523  | 7.308  | 11.679  | 0.000 | 0.000 | 13.082 |
| Sdpr      | 3.336  | 7.583  | 11.669  | 0.000 | 0.000 | 13.069 |
| 2310014HC | 3.463  | 7.081  | 11.638  | 0.000 | 0.000 | 13.025 |
| Atp8b2    | 3.535  | 6.656  | 11.631  | 0.000 | 0.000 | 13.015 |
| Ttyh3     | 1.718  | 5.703  | 11.625  | 0.000 | 0.000 | 13.006 |
| Atp5g1    | -1.893 | 10.339 | -11.613 | 0.000 | 0.000 | 12.990 |
| Glis3     | 2.792  | 5.179  | 11.612  | 0.000 | 0.000 | 12.988 |
| Myo7a     | 3.070  | 5.638  | 11.612  | 0.000 | 0.000 | 12.988 |
| Ucp2      | -2.555 | 4.446  | -11.609 | 0.000 | 0.000 | 12.983 |
| Apbb2     | 2.877  | 7.797  | 11.566  | 0.000 | 0.000 | 12.922 |
| Ndufs5    | -1.594 | 9.114  | -11.544 | 0.000 | 0.000 | 12.892 |
| Rnmt      | 1.563  | 5.409  | 11.529  | 0.000 | 0.000 | 12.870 |
| Glipr1    | 4.244  | 7.136  | 11.517  | 0.000 | 0.000 | 12.853 |
| Bmp1      | 4.306  | 6.619  | 11.497  | 0.000 | 0.000 | 12.824 |
| Cttbnp2n1 | 2.830  | 4.673  | 11.490  | 0.000 | 0.000 | 12.813 |
| Klra18    | 4.980  | 6.369  | 11.468  | 0.000 | 0.000 | 12.782 |
| Unc5b     | 3.099  | 6.400  | 11.427  | 0.000 | 0.000 | 12.723 |
| Gm5529    | -2.882 | 7.347  | -11.419 | 0.000 | 0.000 | 12.712 |
| Cts1      | 3.319  | 11.061 | 11.405  | 0.000 | 0.000 | 12.691 |
| Dab2      | 4.783  | 6.483  | 11.401  | 0.000 | 0.000 | 12.687 |
| 270008101 | 2.672  | 4.909  | 11.393  | 0.000 | 0.000 | 12.674 |
| Fgd3      | 2.560  | 5.282  | 11.386  | 0.000 | 0.000 | 12.665 |
| Islr      | 3.333  | 5.239  | 11.377  | 0.000 | 0.000 | 12.651 |
| Scarf2    | 3.607  | 5.325  | 11.361  | 0.000 | 0.000 | 12.628 |
| Fbn1      | 3.879  | 6.197  | 11.351  | 0.000 | 0.000 | 12.613 |
| Tubala    | 2.820  | 9.693  | 11.345  | 0.000 | 0.000 | 12.605 |
| Ptgs2     | 4.460  | 6.256  | 11.314  | 0.000 | 0.000 | 12.560 |
| Tstd1     | -4.755 | 5.522  | -11.295 | 0.000 | 0.000 | 12.532 |
| Tnfrsf22  | 3.914  | 7.910  | 11.273  | 0.000 | 0.000 | 12.500 |
| Thbs2     | 5.069  | 6.141  | 11.262  | 0.000 | 0.000 | 12.485 |
| Pla2g7    | 4.789  | 6.715  | 11.248  | 0.000 | 0.000 | 12.464 |
| Mfap5     | 4.947  | 6.394  | 11.235  | 0.000 | 0.000 | 12.444 |
| Stx11     | 3.594  | 5.323  | 11.205  | 0.000 | 0.000 | 12.401 |
| Dmwd      | 3.056  | 5.935  | 11.188  | 0.000 | 0.000 | 12.377 |
| Csnk1e    | 2.861  | 6.883  | 11.168  | 0.000 | 0.000 | 12.346 |
| Tgfb3     | 3.886  | 5.681  | 11.139  | 0.000 | 0.000 | 12.304 |
| Abcb1b    | 4.124  | 6.353  | 11.135  | 0.000 | 0.000 | 12.298 |
| Epn2      | 2.524  | 6.964  | 11.131  | 0.000 | 0.000 | 12.293 |
| Ankrd1    | 5.383  | 6.873  | 11.117  | 0.000 | 0.000 | 12.272 |
| Sparc11   | 4.706  | 7.399  | 11.114  | 0.000 | 0.000 | 12.267 |
| Frmd4a    | 4.870  | 6.562  | 11.095  | 0.000 | 0.000 | 12.239 |
| Col3a1    | 5.568  | 10.123 | 11.090  | 0.000 | 0.000 | 12.232 |

|           |        |        |         |       |       |        |
|-----------|--------|--------|---------|-------|-------|--------|
| Mex3d     | 2.418  | 6.596  | 11.080  | 0.000 | 0.000 | 12.218 |
| Axl       | 5.429  | 6.803  | 11.046  | 0.000 | 0.000 | 12.166 |
| Vim       | 5.310  | 9.753  | 11.043  | 0.000 | 0.000 | 12.163 |
| Fhod1     | 2.459  | 6.516  | 11.017  | 0.000 | 0.000 | 12.124 |
| Fpr2      | 3.892  | 5.463  | 11.003  | 0.000 | 0.000 | 12.103 |
| Adam19    | 3.182  | 5.527  | 10.983  | 0.000 | 0.000 | 12.073 |
| Procr     | 3.345  | 6.855  | 10.967  | 0.000 | 0.000 | 12.050 |
| Plala     | 4.073  | 6.525  | 10.964  | 0.000 | 0.000 | 12.046 |
| Asap1     | 2.702  | 5.696  | 10.942  | 0.000 | 0.000 | 12.013 |
| Prmt2     | 2.363  | 7.524  | 10.940  | 0.000 | 0.000 | 12.009 |
| Itgav     | 3.146  | 4.932  | 10.934  | 0.000 | 0.000 | 12.001 |
| Parvb     | 3.131  | 6.101  | 10.930  | 0.000 | 0.000 | 11.995 |
| Adamts2   | 2.964  | 5.127  | 10.912  | 0.000 | 0.000 | 11.967 |
| Ereg      | 4.391  | 5.896  | 10.884  | 0.000 | 0.000 | 11.925 |
| Rin1      | 2.597  | 6.238  | 10.874  | 0.000 | 0.000 | 11.912 |
| Bmper     | 2.924  | 5.206  | 10.871  | 0.000 | 0.000 | 11.906 |
| Bola3     | -1.298 | 9.263  | -10.870 | 0.000 | 0.000 | 11.906 |
| Nlgn2     | 2.822  | 6.151  | 10.845  | 0.000 | 0.000 | 11.868 |
| 2310007Bc | 4.354  | 5.429  | 10.837  | 0.000 | 0.000 | 11.856 |
| Cygb      | 2.949  | 5.735  | 10.835  | 0.000 | 0.000 | 11.852 |
| Slc25a24  | 3.449  | 7.097  | 10.816  | 0.000 | 0.000 | 11.823 |
| Fam38a    | 2.042  | 7.034  | 10.777  | 0.000 | 0.000 | 11.765 |
| Gsdmc     | -2.377 | 4.092  | -10.772 | 0.000 | 0.000 | 11.758 |
| Gm4076    | -1.441 | 12.334 | -10.771 | 0.000 | 0.000 | 11.756 |
| A730054Jz | 3.565  | 5.360  | 10.753  | 0.000 | 0.000 | 11.729 |
| Uqcr10    | -1.754 | 10.163 | -10.753 | 0.000 | 0.000 | 11.728 |
| Dda1      | 2.210  | 6.800  | 10.752  | 0.000 | 0.000 | 11.728 |
| Rnf169    | 2.558  | 5.385  | 10.747  | 0.000 | 0.000 | 11.720 |
| D10Jhu81e | -2.072 | 8.461  | -10.719 | 0.000 | 0.000 | 11.678 |
| Dse       | 2.803  | 5.315  | 10.680  | 0.000 | 0.000 | 11.618 |
| Slit3     | 3.804  | 5.529  | 10.676  | 0.000 | 0.000 | 11.612 |
| Dyrk3     | 2.436  | 5.127  | 10.676  | 0.000 | 0.000 | 11.612 |
| Col8a1    | 4.147  | 6.607  | 10.664  | 0.000 | 0.000 | 11.595 |
| Fnbp1     | 2.649  | 5.994  | 10.661  | 0.000 | 0.000 | 11.589 |
| Grina     | 2.103  | 7.548  | 10.661  | 0.000 | 0.000 | 11.589 |
| Ccdc80    | 4.338  | 7.187  | 10.638  | 0.000 | 0.000 | 11.555 |
| Arg1      | 5.368  | 9.188  | 10.617  | 0.000 | 0.000 | 11.522 |
| Fst       | 4.482  | 6.383  | 10.616  | 0.000 | 0.000 | 11.521 |
| Zfp647    | 2.290  | 4.754  | 10.604  | 0.000 | 0.000 | 11.502 |
| Col6a2    | 3.121  | 5.941  | 10.570  | 0.000 | 0.000 | 11.450 |
| Capn2     | 2.116  | 9.630  | 10.553  | 0.000 | 0.000 | 11.424 |
| Reck      | 1.895  | 4.128  | 10.553  | 0.000 | 0.000 | 11.424 |
| Fcgr2b    | 3.372  | 7.040  | 10.552  | 0.000 | 0.000 | 11.423 |
| Colec12   | 2.139  | 3.933  | 10.549  | 0.000 | 0.000 | 11.418 |
| Dpy1911   | 3.132  | 7.194  | 10.543  | 0.000 | 0.000 | 11.408 |
| Tfpi2     | 2.703  | 4.628  | 10.541  | 0.000 | 0.000 | 11.405 |
| Zfp516    | 2.095  | 5.592  | 10.533  | 0.000 | 0.000 | 11.393 |
| Plch2     | -2.325 | 4.471  | -10.525 | 0.000 | 0.000 | 11.382 |
| Ankrd28   | 3.108  | 7.075  | 10.523  | 0.000 | 0.000 | 11.378 |
| C1s       | 3.291  | 6.492  | 10.519  | 0.000 | 0.000 | 11.372 |



|           |        |        |         |       |       |        |
|-----------|--------|--------|---------|-------|-------|--------|
| Fam84a    | 3.181  | 6.980  | 10.505  | 0.000 | 0.000 | 11.351 |
| Slc1a3    | -2.869 | 4.105  | -10.501 | 0.000 | 0.000 | 11.345 |
| Uqcr11    | -1.774 | 10.290 | -10.489 | 0.000 | 0.000 | 11.325 |
| Pip4k2a   | 2.422  | 5.586  | 10.465  | 0.000 | 0.000 | 11.290 |
| Antxr2    | 3.736  | 8.369  | 10.455  | 0.000 | 0.000 | 11.273 |
| Ly86      | 3.535  | 7.259  | 10.452  | 0.000 | 0.000 | 11.269 |
| Clec7a    | 4.300  | 7.121  | 10.444  | 0.000 | 0.000 | 11.257 |
| LOC100038 | 4.729  | 6.237  | 10.444  | 0.000 | 0.000 | 11.256 |
| Thbs1     | 4.860  | 7.593  | 10.442  | 0.000 | 0.000 | 11.253 |
| Alg10b    | 1.649  | 5.147  | 10.404  | 0.000 | 0.000 | 11.195 |
| Pdpn      | 3.988  | 5.894  | 10.387  | 0.000 | 0.000 | 11.168 |
| S100a8    | 5.196  | 7.110  | 10.354  | 0.000 | 0.000 | 11.117 |
| Dusp4     | 3.180  | 8.300  | 10.340  | 0.000 | 0.000 | 11.095 |
| Irak2     | 1.983  | 6.171  | 10.338  | 0.000 | 0.000 | 11.093 |
| Arhgap23  | 2.408  | 5.290  | 10.334  | 0.000 | 0.000 | 11.085 |
| Emp1      | 3.651  | 9.764  | 10.326  | 0.000 | 0.000 | 11.073 |
| Sipa1     | 2.274  | 5.164  | 10.316  | 0.000 | 0.000 | 11.058 |
| AU020206  | 2.461  | 6.534  | 10.312  | 0.000 | 0.000 | 11.051 |
| Nuak1     | 2.542  | 5.038  | 10.290  | 0.000 | 0.000 | 11.017 |
| Mex3b     | 2.949  | 4.738  | 10.283  | 0.000 | 0.000 | 11.006 |
| 1700017BC | 2.864  | 6.170  | 10.280  | 0.000 | 0.000 | 11.002 |
| 231002901 | 1.565  | 4.753  | 10.276  | 0.000 | 0.000 | 10.996 |
| Dennd5a   | 3.689  | 7.629  | 10.268  | 0.000 | 0.000 | 10.982 |
| Lsp1      | 3.159  | 6.513  | 10.236  | 0.000 | 0.000 | 10.932 |
| 1110012J1 | 2.828  | 7.320  | 10.224  | 0.000 | 0.000 | 10.914 |
| 5430404G1 | 2.989  | 4.856  | 10.224  | 0.000 | 0.000 | 10.913 |
| LOC632664 | 3.272  | 6.498  | 10.217  | 0.000 | 0.000 | 10.902 |
| Gp49a     | 4.274  | 8.260  | 10.214  | 0.000 | 0.000 | 10.897 |
| Zfp750    | -1.984 | 4.564  | -10.211 | 0.000 | 0.000 | 10.893 |
| Vcan      | 3.971  | 5.868  | 10.203  | 0.000 | 0.000 | 10.880 |
| Gpihbp1   | 3.705  | 5.670  | 10.200  | 0.000 | 0.000 | 10.876 |
| 2310028H2 | 1.411  | 4.419  | 10.184  | 0.000 | 0.000 | 10.851 |
| Hsd11b1   | 3.067  | 6.493  | 10.180  | 0.000 | 0.000 | 10.844 |
| Scp2      | -1.649 | 3.495  | -10.170 | 0.000 | 0.000 | 10.829 |
| Vamp5     | 3.206  | 6.937  | 10.160  | 0.000 | 0.000 | 10.813 |
| D630004K1 | -4.774 | 5.219  | -10.141 | 0.000 | 0.000 | 10.782 |
| Fstl3     | 2.304  | 5.616  | 10.114  | 0.000 | 0.000 | 10.740 |
| Clqa      | 5.431  | 7.594  | 10.109  | 0.000 | 0.000 | 10.733 |
| Tgfb1     | 4.609  | 6.229  | 10.108  | 0.000 | 0.000 | 10.730 |
| Olfm1     | 3.140  | 5.331  | 10.085  | 0.000 | 0.000 | 10.695 |
| Fam126a   | 2.800  | 5.573  | 10.080  | 0.000 | 0.000 | 10.686 |
| Dok1      | 3.563  | 6.100  | 10.077  | 0.000 | 0.000 | 10.681 |
| Brp44     | -1.598 | 9.136  | -10.076 | 0.000 | 0.000 | 10.680 |
| Acta2     | 4.579  | 8.215  | 10.068  | 0.000 | 0.000 | 10.667 |
| Rasal2    | 2.082  | 6.037  | 10.063  | 0.000 | 0.000 | 10.659 |
| Apob48r   | 3.614  | 5.561  | 10.044  | 0.000 | 0.000 | 10.629 |
| Nkx6-2    | -2.953 | 3.964  | -10.039 | 0.000 | 0.000 | 10.621 |
| 2310022BC | 1.949  | 6.818  | 10.033  | 0.000 | 0.000 | 10.611 |
| Efna4     | 3.142  | 5.765  | 10.017  | 0.000 | 0.000 | 10.586 |
| Akap12    | 3.789  | 6.053  | 10.009  | 0.000 | 0.000 | 10.572 |

|           |        |        |        |       |       |        |
|-----------|--------|--------|--------|-------|-------|--------|
| Gda       | 3.041  | 4.914  | 10.000 | 0.000 | 0.000 | 10.559 |
| Zwint     | 3.137  | 8.056  | 9.977  | 0.000 | 0.000 | 10.522 |
| Trip10    | 1.765  | 7.877  | 9.949  | 0.000 | 0.000 | 10.477 |
| Cbx6      | 2.301  | 6.024  | 9.942  | 0.000 | 0.000 | 10.466 |
| Slc22a1   | -2.127 | 4.374  | -9.933 | 0.000 | 0.000 | 10.452 |
| Usp6n1    | 1.960  | 5.643  | 9.928  | 0.000 | 0.000 | 10.444 |
| Sema4c    | 2.318  | 5.518  | 9.926  | 0.000 | 0.000 | 10.440 |
| Tnfaip2   | 3.769  | 6.149  | 9.916  | 0.000 | 0.000 | 10.423 |
| Kif26b    | 2.950  | 4.368  | 9.913  | 0.000 | 0.000 | 10.420 |
| Bnip1     | -2.652 | 3.689  | -9.897 | 0.000 | 0.000 | 10.394 |
| Mettl6    | 1.080  | 5.796  | 9.890  | 0.000 | 0.000 | 10.383 |
| Sh3bp2    | 1.978  | 5.866  | 9.873  | 0.000 | 0.000 | 10.356 |
| Ift57     | 2.126  | 6.613  | 9.871  | 0.000 | 0.000 | 10.352 |
| Xdh       | 3.206  | 6.487  | 9.849  | 0.000 | 0.000 | 10.316 |
| Atp5k     | -1.214 | 11.046 | -9.844 | 0.000 | 0.000 | 10.308 |
| Gnb4      | 3.186  | 4.845  | 9.828  | 0.000 | 0.000 | 10.282 |
| Arhgap17  | 1.246  | 6.576  | 9.828  | 0.000 | 0.000 | 10.282 |
| Tfpi      | 1.689  | 3.693  | 9.827  | 0.000 | 0.000 | 10.280 |
| Rap2b     | 2.584  | 6.822  | 9.823  | 0.000 | 0.000 | 10.273 |
| Adam8     | 3.384  | 5.364  | 9.822  | 0.000 | 0.000 | 10.273 |
| Ctla2b    | 4.263  | 5.516  | 9.812  | 0.000 | 0.000 | 10.256 |
| Yipf3     | -1.343 | 4.496  | -9.808 | 0.000 | 0.000 | 10.250 |
| F13a1     | 4.559  | 7.077  | 9.801  | 0.000 | 0.000 | 10.238 |
| 4432414F  | 2.029  | 5.495  | 9.800  | 0.000 | 0.000 | 10.237 |
| Slc39a6   | 3.477  | 7.365  | 9.792  | 0.000 | 0.000 | 10.224 |
| Rdx       | 4.264  | 7.331  | 9.769  | 0.000 | 0.000 | 10.187 |
| Ptprs     | 2.262  | 7.799  | 9.756  | 0.000 | 0.000 | 10.165 |
| AU015263  | 2.633  | 4.634  | 9.750  | 0.000 | 0.000 | 10.156 |
| Cdh2      | 4.709  | 5.491  | 9.744  | 0.000 | 0.000 | 10.146 |
| Chsy1     | 4.085  | 7.662  | 9.716  | 0.000 | 0.000 | 10.100 |
| Sspn      | 3.879  | 5.549  | 9.712  | 0.000 | 0.000 | 10.093 |
| Phlda3    | 3.459  | 6.483  | 9.711  | 0.000 | 0.000 | 10.092 |
| Fermt2    | 3.703  | 7.046  | 9.709  | 0.000 | 0.000 | 10.088 |
| Cyba      | 3.891  | 8.941  | 9.696  | 0.000 | 0.000 | 10.067 |
| S100pbp   | 2.641  | 5.257  | 9.687  | 0.000 | 0.000 | 10.053 |
| Arl4c     | 4.325  | 7.631  | 9.685  | 0.000 | 0.000 | 10.050 |
| Ndufv3    | -1.450 | 10.875 | -9.679 | 0.000 | 0.000 | 10.040 |
| Acaala    | -1.953 | 4.438  | -9.661 | 0.000 | 0.000 | 10.011 |
| A130064L1 | 2.479  | 5.938  | 9.661  | 0.000 | 0.000 | 10.011 |
| Ptk2b     | 1.910  | 6.540  | 9.661  | 0.000 | 0.000 | 10.010 |
| I200003I1 | 2.878  | 11.420 | 9.648  | 0.000 | 0.000 | 9.990  |
| Irx3      | 3.945  | 6.621  | 9.648  | 0.000 | 0.000 | 9.989  |
| Mcam      | 2.402  | 4.989  | 9.623  | 0.000 | 0.000 | 9.947  |
| Pea15a    | 2.626  | 8.014  | 9.613  | 0.000 | 0.000 | 9.931  |
| Ndufa1    | -1.249 | 11.049 | -9.612 | 0.000 | 0.000 | 9.930  |
| Clec4d    | 3.285  | 5.910  | 9.607  | 0.000 | 0.000 | 9.922  |
| Dkk3      | 3.509  | 6.045  | 9.587  | 0.000 | 0.000 | 9.889  |
| Rcsd1     | 1.600  | 5.131  | 9.569  | 0.000 | 0.000 | 9.860  |
| Ext1      | 1.920  | 7.701  | 9.566  | 0.000 | 0.000 | 9.854  |
| Gas8      | 1.903  | 5.282  | 9.558  | 0.000 | 0.000 | 9.841  |

|           |        |        |        |       |       |       |
|-----------|--------|--------|--------|-------|-------|-------|
| Zeb2      | 3.521  | 5.647  | 9.556  | 0.000 | 0.000 | 9.838 |
| Illr2     | 3.936  | 6.538  | 9.556  | 0.000 | 0.000 | 9.837 |
| Socs5     | 2.937  | 7.622  | 9.550  | 0.000 | 0.000 | 9.828 |
| Chchd10   | -3.974 | 8.963  | -9.536 | 0.000 | 0.000 | 9.805 |
| Lix1l     | 2.493  | 5.219  | 9.519  | 0.000 | 0.000 | 9.777 |
| Aes       | -1.425 | 7.681  | -9.510 | 0.000 | 0.000 | 9.762 |
| Ndufb10   | -1.544 | 9.489  | -9.488 | 0.000 | 0.000 | 9.726 |
| Slc25a30  | 2.896  | 5.522  | 9.485  | 0.000 | 0.000 | 9.720 |
| Ndufa5    | -1.809 | 9.123  | -9.462 | 0.000 | 0.000 | 9.682 |
| Epha2     | 2.812  | 7.399  | 9.458  | 0.000 | 0.000 | 9.676 |
| Lrp12     | 2.105  | 5.362  | 9.452  | 0.000 | 0.000 | 9.666 |
| Usf1      | 2.325  | 5.818  | 9.447  | 0.000 | 0.000 | 9.657 |
| 5930433N1 | 2.099  | 4.896  | 9.431  | 0.000 | 0.000 | 9.631 |
| Arhgdig   | -3.558 | 6.516  | -9.425 | 0.000 | 0.000 | 9.620 |
| Mical1    | 2.262  | 5.274  | 9.422  | 0.000 | 0.000 | 9.616 |
| Pdgfrb    | 1.678  | 5.087  | 9.417  | 0.000 | 0.000 | 9.607 |
| Rin3      | 1.899  | 5.168  | 9.409  | 0.000 | 0.000 | 9.593 |
| Sirpa     | 2.625  | 5.914  | 9.396  | 0.000 | 0.000 | 9.572 |
| 6030422H2 | 2.373  | 4.945  | 9.380  | 0.000 | 0.000 | 9.546 |
| F3        | 3.991  | 7.405  | 9.374  | 0.000 | 0.000 | 9.535 |
| Itih5     | 3.748  | 6.014  | 9.372  | 0.000 | 0.000 | 9.533 |
| Twist1    | 3.443  | 5.080  | 9.364  | 0.000 | 0.000 | 9.519 |
| Mobk12a   | 1.596  | 6.350  | 9.362  | 0.000 | 0.000 | 9.515 |
| Cytsb     | 2.433  | 6.515  | 9.361  | 0.000 | 0.000 | 9.513 |
| Maff      | 2.447  | 7.673  | 9.359  | 0.000 | 0.000 | 9.511 |
| Ccbe1     | 3.829  | 5.632  | 9.353  | 0.000 | 0.000 | 9.500 |
| Plin2     | 2.598  | 9.025  | 9.352  | 0.000 | 0.000 | 9.499 |
| Ndufb7    | -1.282 | 10.489 | -9.337 | 0.000 | 0.000 | 9.473 |
| 1110059G  | -2.312 | 3.488  | -9.333 | 0.000 | 0.000 | 9.466 |
| Tmem71    | 3.010  | 5.426  | 9.325  | 0.000 | 0.000 | 9.454 |
| Hint2     | -1.424 | 8.144  | -9.320 | 0.000 | 0.000 | 9.445 |
| Plcd3     | 2.293  | 5.625  | 9.303  | 0.000 | 0.000 | 9.416 |
| Clqc      | 4.493  | 7.051  | 9.302  | 0.000 | 0.000 | 9.414 |
| Rbpms     | 2.895  | 6.595  | 9.298  | 0.000 | 0.000 | 9.408 |
| Lpgat1    | 3.637  | 8.013  | 9.296  | 0.000 | 0.000 | 9.404 |
| Lrrc31    | -3.239 | 4.346  | -9.285 | 0.000 | 0.000 | 9.387 |
| Klhl6     | 3.245  | 4.932  | 9.280  | 0.000 | 0.000 | 9.377 |
| A4gnt     | -6.244 | 5.652  | -9.272 | 0.000 | 0.000 | 9.364 |
| Cyth2     | 1.777  | 8.508  | 9.262  | 0.000 | 0.000 | 9.347 |
| AU018778  | -5.126 | 5.095  | -9.255 | 0.000 | 0.000 | 9.335 |
| Ahnak2    | 3.299  | 7.482  | 9.252  | 0.000 | 0.000 | 9.331 |
| Afm       | -2.040 | 3.727  | -9.237 | 0.000 | 0.000 | 9.305 |
| C2cd4b    | -2.816 | 4.851  | -9.235 | 0.000 | 0.000 | 9.302 |
| Ptprb     | 2.697  | 5.837  | 9.225  | 0.000 | 0.000 | 9.286 |
| Zfp281    | 2.046  | 5.884  | 9.225  | 0.000 | 0.000 | 9.285 |
| Fez2      | 2.688  | 6.661  | 9.223  | 0.000 | 0.000 | 9.282 |
| 1200009IC | 2.423  | 4.733  | 9.222  | 0.000 | 0.000 | 9.281 |
| Spred1    | 1.944  | 8.420  | 9.216  | 0.000 | 0.000 | 9.270 |
| Ndufb8    | -1.253 | 10.499 | -9.210 | 0.000 | 0.000 | 9.260 |
| Arrb2     | 1.933  | 6.999  | 9.209  | 0.000 | 0.000 | 9.258 |

|           |        |        |        |       |       |       |
|-----------|--------|--------|--------|-------|-------|-------|
| Fes       | 2.053  | 6.061  | 9.196  | 0.000 | 0.000 | 9.236 |
| I117rd    | 2.290  | 4.506  | 9.195  | 0.000 | 0.000 | 9.235 |
| Hmga2-ps1 | 3.527  | 5.651  | 9.189  | 0.000 | 0.000 | 9.225 |
| Nr0b2     | -3.632 | 4.487  | -9.185 | 0.000 | 0.000 | 9.217 |
| Fosb      | -3.089 | 4.625  | -9.172 | 0.000 | 0.000 | 9.195 |
| Cd99      | 3.048  | 7.152  | 9.157  | 0.000 | 0.000 | 9.169 |
| LOC100046 | -1.236 | 10.544 | -9.152 | 0.000 | 0.000 | 9.161 |
| Efnb2     | 3.425  | 7.807  | 9.150  | 0.000 | 0.000 | 9.158 |
| Myb       | -2.624 | 4.424  | -9.150 | 0.000 | 0.000 | 9.157 |
| Cdc42bpa  | 1.038  | 6.100  | 9.141  | 0.000 | 0.000 | 9.142 |
| Htra1     | 2.982  | 7.330  | 9.140  | 0.000 | 0.000 | 9.140 |
| LOC100048 | 2.035  | 5.957  | 9.122  | 0.000 | 0.000 | 9.110 |
| Ndufb9    | -1.458 | 10.964 | -9.119 | 0.000 | 0.000 | 9.106 |
| Zbtb20    | 1.917  | 6.644  | 9.116  | 0.000 | 0.000 | 9.100 |
| Stxbp1    | 2.776  | 5.459  | 9.114  | 0.000 | 0.000 | 9.096 |
| Hamp2     | -5.783 | 5.023  | -9.113 | 0.000 | 0.000 | 9.094 |
| Tlr13     | 2.462  | 4.650  | 9.112  | 0.000 | 0.000 | 9.094 |
| AU019559  | 2.018  | 4.640  | 9.104  | 0.000 | 0.000 | 9.079 |
| Prr3      | 1.621  | 4.444  | 9.100  | 0.000 | 0.000 | 9.073 |
| Slc20a2   | 2.839  | 7.302  | 9.098  | 0.000 | 0.000 | 9.069 |
| Rhbdf1    | 2.564  | 7.781  | 9.096  | 0.000 | 0.000 | 9.066 |
| Runx1     | 2.051  | 8.952  | 9.089  | 0.000 | 0.000 | 9.053 |
| Pf4       | 3.439  | 7.124  | 9.079  | 0.000 | 0.000 | 9.037 |
| Sumf2     | 2.105  | 5.558  | 9.059  | 0.000 | 0.000 | 9.002 |
| Fgfr1     | 3.068  | 5.843  | 9.052  | 0.000 | 0.000 | 8.991 |
| Ank       | 5.080  | 7.494  | 9.049  | 0.000 | 0.000 | 8.986 |
| Frmd6     | 2.761  | 7.226  | 9.045  | 0.000 | 0.000 | 8.978 |
| Itgb2     | 3.625  | 6.938  | 9.040  | 0.000 | 0.000 | 8.969 |
| Slc25a35  | -4.208 | 4.758  | -9.038 | 0.000 | 0.000 | 8.966 |
| B3galnt1  | 2.960  | 4.660  | 9.018  | 0.000 | 0.000 | 8.932 |
| Dkk2      | 3.080  | 5.066  | 9.003  | 0.000 | 0.000 | 8.907 |
| Mmp11     | 2.272  | 4.492  | 8.983  | 0.000 | 0.000 | 8.872 |
| LOC640441 | 4.830  | 8.584  | 8.954  | 0.000 | 0.000 | 8.821 |
| C81615    | 2.413  | 4.677  | 8.934  | 0.000 | 0.000 | 8.788 |
| Lrpap1    | -1.383 | 8.245  | -8.929 | 0.000 | 0.000 | 8.779 |
| Csgalnact | 2.897  | 7.566  | 8.903  | 0.000 | 0.000 | 8.734 |
| Mrpl42    | -1.897 | 9.753  | -8.903 | 0.000 | 0.000 | 8.733 |
| Phldb2    | 2.809  | 8.526  | 8.900  | 0.000 | 0.000 | 8.729 |
| Ctsz      | 2.391  | 9.906  | 8.894  | 0.000 | 0.000 | 8.718 |
| Parp8     | 2.834  | 5.100  | 8.884  | 0.000 | 0.000 | 8.700 |
| Polr1a    | 1.604  | 6.458  | 8.876  | 0.000 | 0.000 | 8.686 |
| Ptpn1     | 1.247  | 8.097  | 8.872  | 0.000 | 0.000 | 8.680 |
| Ifi2712b  | -3.735 | 6.251  | -8.865 | 0.000 | 0.000 | 8.668 |
| Zdhhc15   | 1.924  | 4.965  | 8.864  | 0.000 | 0.000 | 8.665 |
| Selp      | 2.320  | 4.851  | 8.861  | 0.000 | 0.000 | 8.661 |
| Pramef8   | 2.157  | 4.472  | 8.853  | 0.000 | 0.000 | 8.647 |
| 3110049Jz | -3.077 | 4.425  | -8.850 | 0.000 | 0.000 | 8.642 |
| Cic       | 2.037  | 6.312  | 8.843  | 0.000 | 0.000 | 8.629 |
| Pank3     | 1.929  | 5.943  | 8.842  | 0.000 | 0.000 | 8.628 |
| D630002Gc | -1.112 | 2.944  | -8.830 | 0.000 | 0.000 | 8.607 |

|           |        |        |        |       |       |       |
|-----------|--------|--------|--------|-------|-------|-------|
| Sytl1     | -3.051 | 4.737  | -8.810 | 0.000 | 0.000 | 8.573 |
| St6galnac | 2.042  | 5.092  | 8.793  | 0.000 | 0.000 | 8.542 |
| Itga2     | 2.852  | 5.361  | 8.784  | 0.000 | 0.000 | 8.526 |
| Fcgr4     | 3.991  | 5.466  | 8.782  | 0.000 | 0.000 | 8.523 |
| Rab34     | 2.900  | 7.568  | 8.779  | 0.000 | 0.000 | 8.517 |
| Icam1     | 2.875  | 6.074  | 8.777  | 0.000 | 0.000 | 8.514 |
| LOC552904 | 2.034  | 5.770  | 8.776  | 0.000 | 0.000 | 8.514 |
| Pilrb1    | 3.626  | 6.068  | 8.774  | 0.000 | 0.000 | 8.508 |
| Ctxnl     | 2.749  | 5.179  | 8.773  | 0.000 | 0.000 | 8.508 |
| Ppih      | 1.679  | 5.223  | 8.766  | 0.000 | 0.000 | 8.495 |
| Large     | 2.573  | 6.820  | 8.765  | 0.000 | 0.000 | 8.493 |
| Lama4     | 2.155  | 5.585  | 8.761  | 0.000 | 0.000 | 8.487 |
| 9630010G1 | 2.293  | 7.875  | 8.758  | 0.000 | 0.000 | 8.482 |
| Fam195a   | -2.531 | 7.019  | -8.757 | 0.000 | 0.000 | 8.480 |
| Tnnt2     | 5.142  | 6.377  | 8.756  | 0.000 | 0.000 | 8.477 |
| Agrn      | 2.221  | 8.690  | 8.748  | 0.000 | 0.000 | 8.464 |
| Fam198b   | 2.953  | 5.022  | 8.746  | 0.000 | 0.000 | 8.460 |
| Caprin2   | 2.324  | 5.787  | 8.724  | 0.000 | 0.000 | 8.422 |
| Fhl       | -1.721 | 9.893  | -8.718 | 0.000 | 0.000 | 8.412 |
| Git2      | 1.584  | 7.579  | 8.694  | 0.000 | 0.000 | 8.370 |
| AA409587  | 1.980  | 6.048  | 8.694  | 0.000 | 0.000 | 8.369 |
| Clqtnf5   | 2.094  | 5.614  | 8.694  | 0.000 | 0.000 | 8.369 |
| Pdk2      | -1.455 | 4.243  | -8.691 | 0.000 | 0.000 | 8.363 |
| Tyrobp    | 4.414  | 7.848  | 8.688  | 0.000 | 0.000 | 8.359 |
| 1700024N2 | -2.346 | 4.012  | -8.681 | 0.000 | 0.000 | 8.346 |
| 4931406P1 | 2.232  | 6.622  | 8.680  | 0.000 | 0.000 | 8.344 |
| Cnn2      | 3.862  | 7.904  | 8.679  | 0.000 | 0.000 | 8.343 |
| Dnajb6    | 1.917  | 7.527  | 8.669  | 0.000 | 0.000 | 8.324 |
| Gngl3     | -2.578 | 3.781  | -8.667 | 0.000 | 0.000 | 8.321 |
| Ctdpl     | 1.555  | 6.684  | 8.666  | 0.000 | 0.000 | 8.320 |
| 5330409NC | -2.084 | 4.128  | -8.662 | 0.000 | 0.000 | 8.312 |
| Ehbp111   | 2.137  | 4.848  | 8.658  | 0.000 | 0.000 | 8.305 |
| Acvr1     | 2.180  | 5.353  | 8.656  | 0.000 | 0.000 | 8.302 |
| Ankrd50   | 3.246  | 8.052  | 8.643  | 0.000 | 0.000 | 8.280 |
| Palmd     | 4.387  | 7.693  | 8.639  | 0.000 | 0.000 | 8.273 |
| Hmgcl11   | 3.230  | 5.398  | 8.638  | 0.000 | 0.000 | 8.270 |
| St6galnac | -3.036 | 6.341  | -8.637 | 0.000 | 0.000 | 8.268 |
| Sox4      | 2.662  | 8.115  | 8.633  | 0.000 | 0.000 | 8.262 |
| Lepr      | 4.281  | 5.293  | 8.632  | 0.000 | 0.000 | 8.260 |
| Clec4n    | 4.328  | 6.450  | 8.610  | 0.000 | 0.000 | 8.220 |
| Cyp2c55   | -1.491 | 4.207  | -8.589 | 0.000 | 0.000 | 8.184 |
| 1700040LC | -2.778 | 4.344  | -8.575 | 0.000 | 0.000 | 8.159 |
| 5830411K2 | 2.214  | 4.637  | 8.575  | 0.000 | 0.000 | 8.158 |
| 3000002C1 | 1.090  | 12.326 | 8.571  | 0.000 | 0.000 | 8.152 |
| Cd248     | 1.506  | 5.022  | 8.568  | 0.000 | 0.000 | 8.147 |
| Mdk       | 2.599  | 4.481  | 8.564  | 0.000 | 0.000 | 8.139 |
| Slc16a5   | -3.487 | 4.186  | -8.561 | 0.000 | 0.000 | 8.134 |
| Rdh10     | 2.597  | 9.756  | 8.557  | 0.000 | 0.000 | 8.126 |
| Phyh      | -3.181 | 9.105  | -8.556 | 0.000 | 0.000 | 8.124 |
| AW987390  | 2.099  | 5.633  | 8.554  | 0.000 | 0.000 | 8.121 |

|          |        |        |        |       |       |       |
|----------|--------|--------|--------|-------|-------|-------|
| Man2a2   | 2.638  | 6.221  | 8.552  | 0.000 | 0.000 | 8.118 |
| Mex3a    | 1.923  | 5.562  | 8.549  | 0.000 | 0.000 | 8.113 |
| Plxdc2   | 2.430  | 5.790  | 8.547  | 0.000 | 0.000 | 8.110 |
| Homer3   | 1.756  | 4.781  | 8.547  | 0.000 | 0.000 | 8.108 |
| Kif3a    | 2.368  | 6.851  | 8.546  | 0.000 | 0.000 | 8.106 |
| 9030418K | 1.977  | 4.566  | 8.541  | 0.000 | 0.000 | 8.099 |
| Prosl    | 2.610  | 6.558  | 8.507  | 0.000 | 0.000 | 8.037 |
| Ces1     | -1.486 | 3.226  | -8.505 | 0.000 | 0.000 | 8.034 |
| Lcn2     | 5.611  | 6.871  | 8.505  | 0.000 | 0.000 | 8.034 |
| Cr1f2    | 2.505  | 6.144  | 8.504  | 0.000 | 0.000 | 8.032 |
| Thbs3    | 1.943  | 4.983  | 8.502  | 0.000 | 0.000 | 8.028 |
| Apoo     | -1.899 | 8.104  | -8.499 | 0.000 | 0.000 | 8.023 |
| Gjb3     | 2.524  | 5.007  | 8.498  | 0.000 | 0.000 | 8.021 |
| Pigy1    | -1.451 | 7.713  | -8.496 | 0.000 | 0.000 | 8.018 |
| Mxra8    | 4.037  | 7.471  | 8.484  | 0.000 | 0.000 | 7.997 |
| Arhgap24 | -2.241 | 5.426  | -8.482 | 0.000 | 0.000 | 7.993 |
| Ndufv1   | -1.210 | 9.867  | -8.473 | 0.000 | 0.000 | 7.978 |
| Sned1    | 2.821  | 4.497  | 8.469  | 0.000 | 0.000 | 7.970 |
| H2-Ke6   | -2.154 | 7.059  | -8.469 | 0.000 | 0.000 | 7.969 |
| Glb112   | -2.317 | 4.011  | -8.461 | 0.000 | 0.000 | 7.955 |
| Aebp1    | 3.363  | 5.892  | 8.454  | 0.000 | 0.000 | 7.943 |
| Plod1    | 2.052  | 6.056  | 8.448  | 0.000 | 0.000 | 7.932 |
| 1100001G | 3.874  | 5.436  | 8.448  | 0.000 | 0.000 | 7.932 |
| Agap1    | 2.431  | 6.782  | 8.448  | 0.000 | 0.000 | 7.932 |
| 9930017N | 1.958  | 5.703  | 8.443  | 0.000 | 0.000 | 7.923 |
| Porcn    | 2.856  | 7.263  | 8.439  | 0.000 | 0.000 | 7.916 |
| Elk3     | 2.418  | 4.623  | 8.437  | 0.000 | 0.000 | 7.912 |
| Eid2     | 2.384  | 7.198  | 8.434  | 0.000 | 0.000 | 7.907 |
| AU042950 | 1.693  | 4.512  | 8.428  | 0.000 | 0.000 | 7.896 |
| D230019N | 1.381  | 4.680  | 8.420  | 0.000 | 0.000 | 7.882 |
| Fkbp14   | 2.232  | 5.882  | 8.415  | 0.000 | 0.000 | 7.872 |
| Ubxn10   | -2.003 | 3.834  | -8.412 | 0.000 | 0.000 | 7.868 |
| Fcer1g   | 3.737  | 6.976  | 8.410  | 0.000 | 0.000 | 7.863 |
| Lhfp12   | 2.059  | 5.059  | 8.408  | 0.000 | 0.000 | 7.861 |
| 8-Sep    | 1.186  | 6.754  | 8.401  | 0.000 | 0.000 | 7.848 |
| 2010107E | -1.134 | 10.316 | -8.395 | 0.000 | 0.000 | 7.838 |
| Ksr1     | 1.569  | 4.752  | 8.395  | 0.000 | 0.000 | 7.837 |
| Nb11     | 3.621  | 7.220  | 8.394  | 0.000 | 0.000 | 7.835 |
| Aox1     | 3.387  | 6.016  | 8.392  | 0.000 | 0.000 | 7.832 |
| Serpinh1 | 3.171  | 8.011  | 8.384  | 0.000 | 0.000 | 7.817 |
| A530088H | -2.335 | 4.052  | -8.380 | 0.000 | 0.000 | 7.810 |
| Zfp532   | 2.840  | 6.318  | 8.379  | 0.000 | 0.000 | 7.809 |
| Lamc2    | 2.725  | 7.952  | 8.378  | 0.000 | 0.000 | 7.806 |
| Fkbp1a   | 2.103  | 10.085 | 8.368  | 0.000 | 0.000 | 7.789 |
| 59304300 | 1.950  | 3.774  | 8.366  | 0.000 | 0.000 | 7.784 |
| Ssh1     | 1.296  | 5.444  | 8.363  | 0.000 | 0.000 | 7.780 |
| Cttn     | 2.597  | 6.371  | 8.360  | 0.000 | 0.000 | 7.774 |
| Cdk9     | 1.254  | 9.068  | 8.360  | 0.000 | 0.000 | 7.774 |
| Kdm6b    | 1.798  | 5.813  | 8.350  | 0.000 | 0.000 | 7.757 |
| Adamts1  | 3.383  | 6.081  | 8.349  | 0.000 | 0.000 | 7.755 |

|           |        |        |        |       |       |       |
|-----------|--------|--------|--------|-------|-------|-------|
| My19      | 4.169  | 6.092  | 8.336  | 0.000 | 0.000 | 7.730 |
| Rnpep     | -1.824 | 7.036  | -8.321 | 0.000 | 0.000 | 7.703 |
| Acacb     | -3.528 | 4.839  | -8.319 | 0.000 | 0.000 | 7.701 |
| 2200001I1 | -2.427 | 4.106  | -8.310 | 0.000 | 0.000 | 7.683 |
| Ppargclb  | -3.613 | 6.863  | -8.306 | 0.000 | 0.000 | 7.676 |
| Limd2     | 2.058  | 7.514  | 8.301  | 0.000 | 0.000 | 7.667 |
| Bnip2     | 2.384  | 8.308  | 8.294  | 0.000 | 0.000 | 7.655 |
| Angpt14   | 3.901  | 8.205  | 8.291  | 0.000 | 0.000 | 7.649 |
| Adamts4   | 2.579  | 5.450  | 8.287  | 0.000 | 0.000 | 7.642 |
| Csf1r     | 4.658  | 8.437  | 8.286  | 0.000 | 0.000 | 7.641 |
| Cd34      | 2.581  | 5.297  | 8.279  | 0.000 | 0.000 | 7.627 |
| Ldb1      | 2.029  | 6.973  | 8.275  | 0.000 | 0.000 | 7.621 |
| Hsbp111   | -1.857 | 3.800  | -8.265 | 0.000 | 0.000 | 7.603 |
| Bacel     | 1.861  | 7.043  | 8.259  | 0.000 | 0.000 | 7.591 |
| Mapklip11 | 2.564  | 6.441  | 8.259  | 0.000 | 0.000 | 7.591 |
| Spon1     | 2.079  | 5.552  | 8.253  | 0.000 | 0.000 | 7.580 |
| Tgfb1     | 2.442  | 5.076  | 8.250  | 0.000 | 0.000 | 7.575 |
| Foxj3     | 1.240  | 7.991  | 8.245  | 0.000 | 0.000 | 7.567 |
| Fabp3     | -5.570 | 5.946  | -8.241 | 0.000 | 0.000 | 7.558 |
| 4930445K1 | 1.084  | 4.864  | 8.235  | 0.000 | 0.000 | 7.547 |
| Inhbb     | 2.647  | 6.194  | 8.233  | 0.000 | 0.000 | 7.543 |
| Cdy1      | 2.395  | 5.460  | 8.231  | 0.000 | 0.000 | 7.541 |
| Cpxml     | 3.948  | 6.126  | 8.230  | 0.000 | 0.000 | 7.538 |
| Tnfrsf23  | 2.464  | 4.848  | 8.219  | 0.000 | 0.000 | 7.519 |
| Slc25a5   | -1.459 | 11.440 | -8.208 | 0.000 | 0.000 | 7.499 |
| Ndufv2    | -1.250 | 10.813 | -8.205 | 0.000 | 0.000 | 7.492 |
| Prrt1     | -1.196 | 3.532  | -8.188 | 0.000 | 0.000 | 7.462 |
| A130012E1 | 1.657  | 5.126  | 8.185  | 0.000 | 0.000 | 7.456 |
| Lama3     | 4.547  | 6.729  | 8.185  | 0.000 | 0.000 | 7.456 |
| Phyhd1    | 1.836  | 5.530  | 8.182  | 0.000 | 0.000 | 7.452 |
| Srgn      | 4.407  | 9.511  | 8.179  | 0.000 | 0.000 | 7.445 |
| Ltk       | -2.119 | 4.229  | -8.176 | 0.000 | 0.000 | 7.440 |
| Ddah2     | 2.694  | 6.598  | 8.176  | 0.000 | 0.000 | 7.439 |
| Mcee      | -2.082 | 7.459  | -8.165 | 0.000 | 0.000 | 7.419 |
| Ddit4     | 2.353  | 8.587  | 8.164  | 0.000 | 0.000 | 7.417 |
| Ncoa5     | 1.057  | 6.127  | 8.160  | 0.000 | 0.000 | 7.411 |
| Rgs16     | 2.674  | 5.021  | 8.159  | 0.000 | 0.000 | 7.410 |
| Pogk      | 1.536  | 5.876  | 8.151  | 0.000 | 0.000 | 7.394 |
| Cep120    | 1.731  | 6.266  | 8.148  | 0.000 | 0.000 | 7.389 |
| Pard3b    | -1.675 | 5.178  | -8.145 | 0.000 | 0.000 | 7.383 |
| Socs6     | 2.245  | 5.944  | 8.144  | 0.000 | 0.000 | 7.382 |
| Aldh5a1   | -1.942 | 5.065  | -8.143 | 0.000 | 0.000 | 7.379 |
| Ssh2      | 2.112  | 6.970  | 8.142  | 0.000 | 0.000 | 7.378 |
| Ppl       | 2.540  | 6.459  | 8.140  | 0.000 | 0.000 | 7.375 |
| Celf4     | 1.860  | 4.963  | 8.129  | 0.000 | 0.000 | 7.353 |
| Fam65a    | 2.167  | 6.351  | 8.123  | 0.000 | 0.000 | 7.343 |
| Jun       | -2.206 | 8.919  | -8.119 | 0.000 | 0.000 | 7.335 |
| Dzip11    | 2.193  | 5.924  | 8.116  | 0.000 | 0.000 | 7.330 |
| Itpka     | -2.754 | 4.298  | -8.115 | 0.000 | 0.000 | 7.328 |
| Fyn       | 1.713  | 5.390  | 8.102  | 0.000 | 0.000 | 7.305 |

|           |        |       |        |       |       |       |
|-----------|--------|-------|--------|-------|-------|-------|
| Ndufb2    | -1.524 | 9.044 | -8.099 | 0.000 | 0.000 | 7.299 |
| Mnt       | 1.419  | 7.892 | 8.099  | 0.000 | 0.000 | 7.299 |
| Prrx2     | 3.952  | 5.640 | 8.093  | 0.000 | 0.000 | 7.288 |
| Fgd5      | 2.506  | 4.886 | 8.089  | 0.000 | 0.000 | 7.280 |
| Aim1      | 2.389  | 6.543 | 8.085  | 0.000 | 0.000 | 7.274 |
| Kcnk16    | -1.178 | 3.349 | -8.083 | 0.000 | 0.000 | 7.269 |
| Hspa41    | 2.725  | 7.576 | 8.081  | 0.000 | 0.000 | 7.266 |
| LOC100046 | 2.314  | 8.563 | 8.072  | 0.000 | 0.000 | 7.249 |
| Mfap2     | 2.150  | 4.930 | 8.061  | 0.000 | 0.000 | 7.229 |
| Prkcdbp   | 2.736  | 6.598 | 8.058  | 0.000 | 0.000 | 7.224 |
| B2302140C | 2.794  | 7.079 | 8.058  | 0.000 | 0.000 | 7.223 |
| Pfdn1     | 2.468  | 9.236 | 8.055  | 0.000 | 0.000 | 7.218 |
| Net1      | 2.443  | 7.668 | 8.053  | 0.000 | 0.000 | 7.214 |
| Lim2      | -1.116 | 3.521 | -8.045 | 0.000 | 0.000 | 7.199 |
| Tgif1     | 2.435  | 8.299 | 8.044  | 0.000 | 0.000 | 7.197 |
| Pdgfr1    | 3.203  | 5.384 | 8.042  | 0.000 | 0.000 | 7.194 |
| Zfp90     | 1.963  | 6.393 | 8.034  | 0.000 | 0.000 | 7.179 |
| Atxn7     | -1.422 | 4.502 | -8.033 | 0.000 | 0.000 | 7.176 |
| Tpst2     | 2.321  | 7.639 | 8.029  | 0.000 | 0.000 | 7.169 |
| Ankrd24   | -1.347 | 5.729 | -8.024 | 0.000 | 0.000 | 7.161 |
| Rab2b     | 1.760  | 4.387 | 8.012  | 0.000 | 0.000 | 7.139 |
| Crispld2  | 3.246  | 4.949 | 8.009  | 0.000 | 0.000 | 7.134 |
| Fbn2      | 2.681  | 5.041 | 8.005  | 0.000 | 0.000 | 7.126 |
| Vash1     | 1.758  | 4.962 | 8.004  | 0.000 | 0.000 | 7.123 |
| Pygl      | 3.105  | 6.540 | 7.987  | 0.000 | 0.000 | 7.093 |
| Zfp821    | 1.253  | 5.099 | 7.985  | 0.000 | 0.000 | 7.089 |
| Dram1     | 3.132  | 5.782 | 7.984  | 0.000 | 0.000 | 7.087 |
| Ndufs7    | -1.549 | 9.941 | -7.982 | 0.000 | 0.000 | 7.083 |
| Olfml2b   | 2.720  | 6.441 | 7.963  | 0.000 | 0.000 | 7.047 |
| Nup62     | 1.678  | 7.232 | 7.961  | 0.000 | 0.000 | 7.043 |
| LOC100047 | -4.838 | 5.187 | -7.949 | 0.000 | 0.000 | 7.022 |
| 2310040G2 | -1.140 | 5.200 | -7.942 | 0.000 | 0.000 | 7.009 |
| Spred3    | 2.094  | 4.887 | 7.940  | 0.000 | 0.000 | 7.006 |
| Cira      | 2.575  | 4.884 | 7.935  | 0.000 | 0.000 | 6.995 |
| Crtc3     | 2.038  | 6.132 | 7.933  | 0.000 | 0.000 | 6.993 |
| Smox      | 2.750  | 6.888 | 7.932  | 0.000 | 0.000 | 6.990 |
| Tagln     | 3.917  | 7.862 | 7.925  | 0.000 | 0.000 | 6.976 |
| Arid5b    | 2.501  | 6.604 | 7.917  | 0.000 | 0.000 | 6.962 |
| Arl8a     | 1.761  | 6.804 | 7.912  | 0.000 | 0.000 | 6.953 |
| Mmp12     | 3.823  | 6.431 | 7.909  | 0.000 | 0.000 | 6.947 |
| Zmynd10   | -1.134 | 3.239 | -7.908 | 0.000 | 0.000 | 6.946 |
| Pear1     | 1.682  | 5.682 | 7.904  | 0.000 | 0.000 | 6.938 |
| Rbpms2    | 2.765  | 5.572 | 7.903  | 0.000 | 0.000 | 6.936 |
| Htra3     | 1.963  | 6.184 | 7.897  | 0.000 | 0.000 | 6.926 |
| Ier3      | 3.116  | 9.613 | 7.897  | 0.000 | 0.000 | 6.925 |
| Lilrb3    | 2.319  | 4.668 | 7.893  | 0.000 | 0.000 | 6.918 |
| Myo5a     | 3.375  | 5.164 | 7.889  | 0.000 | 0.000 | 6.911 |
| AU018552  | 2.397  | 4.720 | 7.888  | 0.000 | 0.000 | 6.907 |
| Pank1     | -3.099 | 5.481 | -7.880 | 0.000 | 0.000 | 6.893 |
| Skap2     | 1.674  | 8.611 | 7.879  | 0.000 | 0.000 | 6.892 |



|           |        |        |        |       |       |       |
|-----------|--------|--------|--------|-------|-------|-------|
| Emcn      | 2.870  | 5.672  | 7.876  | 0.000 | 0.000 | 6.885 |
| Txnrd3    | 1.675  | 4.969  | 7.874  | 0.000 | 0.000 | 6.882 |
| Fzd4      | -2.297 | 5.650  | -7.873 | 0.000 | 0.000 | 6.880 |
| Gsdma2    | -5.209 | 5.418  | -7.872 | 0.000 | 0.000 | 6.878 |
| Cox5b     | -1.072 | 10.890 | -7.871 | 0.000 | 0.000 | 6.877 |
| Syt14     | -3.302 | 4.815  | -7.871 | 0.000 | 0.000 | 6.876 |
| Bag2      | 2.241  | 6.296  | 7.866  | 0.000 | 0.000 | 6.866 |
| Retsat    | -2.254 | 6.765  | -7.865 | 0.000 | 0.000 | 6.866 |
| Gvin1     | 4.322  | 6.386  | 7.864  | 0.000 | 0.000 | 6.862 |
| Cycs      | -1.987 | 9.426  | -7.860 | 0.000 | 0.000 | 6.855 |
| Adam15    | 1.527  | 4.102  | 7.855  | 0.000 | 0.000 | 6.846 |
| Pogz      | 1.738  | 5.407  | 7.854  | 0.000 | 0.000 | 6.845 |
| Nhedc2    | -2.766 | 4.531  | -7.853 | 0.000 | 0.000 | 6.843 |
| Sod2      | -1.666 | 8.920  | -7.851 | 0.000 | 0.000 | 6.839 |
| 1810049H1 | -2.062 | 6.791  | -7.847 | 0.000 | 0.000 | 6.832 |
| 493340401 | -1.252 | 4.199  | -7.846 | 0.000 | 0.000 | 6.829 |
| Pcbp3     | 1.808  | 5.845  | 7.839  | 0.000 | 0.000 | 6.817 |
| Kctd18    | 1.212  | 5.071  | 7.831  | 0.000 | 0.000 | 6.802 |
| Tpm4      | 2.056  | 10.812 | 7.823  | 0.000 | 0.000 | 6.787 |
| Btbd7     | 1.665  | 5.245  | 7.821  | 0.000 | 0.000 | 6.783 |
| Bbs12     | 2.430  | 4.981  | 7.819  | 0.000 | 0.000 | 6.779 |
| Frzb      | 2.868  | 4.555  | 7.818  | 0.000 | 0.000 | 6.777 |
| Igsf6     | 2.270  | 4.314  | 7.815  | 0.000 | 0.000 | 6.771 |
| Ptpn23    | 1.295  | 5.140  | 7.807  | 0.000 | 0.000 | 6.756 |
| Stab1     | 2.206  | 6.136  | 7.806  | 0.000 | 0.000 | 6.755 |
| Kcne2     | -5.861 | 4.695  | -7.803 | 0.000 | 0.000 | 6.750 |
| Ggtal     | 2.895  | 6.708  | 7.797  | 0.000 | 0.000 | 6.738 |
| Adamts9   | 1.921  | 4.472  | 7.789  | 0.000 | 0.000 | 6.722 |
| Zyx       | 2.261  | 6.857  | 7.776  | 0.000 | 0.000 | 6.698 |
| Sh2d6     | -2.236 | 3.647  | -7.773 | 0.000 | 0.000 | 6.693 |
| Loxl3     | 3.615  | 6.005  | 7.772  | 0.000 | 0.000 | 6.690 |
| Jak1      | 1.236  | 7.596  | 7.768  | 0.000 | 0.000 | 6.683 |
| AI662270  | 2.434  | 4.640  | 7.745  | 0.000 | 0.000 | 6.640 |
| Hmox1     | 2.487  | 5.887  | 7.734  | 0.000 | 0.000 | 6.619 |
| Fam174b   | -3.905 | 5.975  | -7.734 | 0.000 | 0.000 | 6.619 |
| Klkb1     | -1.013 | 3.376  | -7.733 | 0.000 | 0.000 | 6.617 |
| 1700019DC | -2.210 | 3.644  | -7.726 | 0.000 | 0.000 | 6.604 |
| 4930565B1 | 1.834  | 5.284  | 7.722  | 0.000 | 0.000 | 6.597 |
| Ulk2      | 1.706  | 5.232  | 7.718  | 0.000 | 0.000 | 6.589 |
| Pik3ca    | 2.529  | 6.625  | 7.718  | 0.000 | 0.000 | 6.588 |
| AI746446  | -1.055 | 3.997  | -7.716 | 0.000 | 0.000 | 6.585 |
| Lmna      | 1.565  | 8.889  | 7.715  | 0.000 | 0.000 | 6.582 |
| Enpp5     | -2.844 | 6.856  | -7.713 | 0.000 | 0.000 | 6.580 |
| Ccl9      | 4.010  | 8.052  | 7.712  | 0.000 | 0.000 | 6.577 |
| Etv6      | 1.171  | 5.115  | 7.710  | 0.000 | 0.000 | 6.574 |
| Cbr1      | -2.344 | 9.615  | -7.706 | 0.000 | 0.000 | 6.566 |
| Gm11428   | 4.750  | 7.407  | 7.705  | 0.000 | 0.000 | 6.564 |
| Phlpp2    | 1.158  | 5.226  | 7.700  | 0.000 | 0.000 | 6.554 |
| Gtdcl     | 1.778  | 5.893  | 7.695  | 0.000 | 0.000 | 6.545 |
| Pitpnc1   | 2.261  | 5.644  | 7.692  | 0.000 | 0.000 | 6.539 |

|           |        |        |        |       |       |       |
|-----------|--------|--------|--------|-------|-------|-------|
| Atp5h     | -1.018 | 11.077 | -7.690 | 0.000 | 0.000 | 6.536 |
| Klf13     | 1.911  | 7.731  | 7.683  | 0.000 | 0.000 | 6.522 |
| Tmem150a  | 1.724  | 6.433  | 7.680  | 0.000 | 0.000 | 6.517 |
| 84304370C | 1.434  | 3.919  | 7.676  | 0.000 | 0.000 | 6.509 |
| D10Ert61  | 2.211  | 5.325  | 7.675  | 0.000 | 0.000 | 6.508 |
| Hic1      | 1.204  | 4.416  | 7.672  | 0.000 | 0.000 | 6.502 |
| Cyb5r3    | 1.819  | 9.507  | 7.664  | 0.000 | 0.000 | 6.486 |
| BC004004  | -1.111 | 8.947  | -7.650 | 0.000 | 0.000 | 6.460 |
| Tmem140   | 2.143  | 5.286  | 7.647  | 0.000 | 0.000 | 6.454 |
| D030029Jz | 2.514  | 7.447  | 7.630  | 0.000 | 0.000 | 6.422 |
| Chrm1     | -1.724 | 4.161  | -7.627 | 0.000 | 0.000 | 6.415 |
| LOC10004z | 2.304  | 5.278  | 7.624  | 0.000 | 0.000 | 6.410 |
| Fam20a    | 2.585  | 5.712  | 7.618  | 0.000 | 0.000 | 6.400 |
| Grn       | 1.085  | 10.579 | 7.615  | 0.000 | 0.000 | 6.394 |
| St8sia4   | 2.811  | 5.305  | 7.614  | 0.000 | 0.000 | 6.392 |
| Zswim4    | 1.403  | 4.594  | 7.613  | 0.000 | 0.000 | 6.389 |
| Cav1      | 3.226  | 7.256  | 7.610  | 0.000 | 0.000 | 6.384 |
| Zfp740    | 1.691  | 6.915  | 7.606  | 0.000 | 0.000 | 6.377 |
| Sh3kbp1   | 2.586  | 5.509  | 7.606  | 0.000 | 0.000 | 6.376 |
| Casp3     | 2.854  | 5.534  | 7.605  | 0.000 | 0.000 | 6.375 |
| LOC100047 | 2.232  | 6.598  | 7.604  | 0.000 | 0.000 | 6.372 |
| Arap3     | 3.424  | 5.337  | 7.598  | 0.000 | 0.000 | 6.362 |
| Gata4     | -3.892 | 5.241  | -7.596 | 0.000 | 0.000 | 6.357 |
| Flot2     | 2.032  | 5.888  | 7.596  | 0.000 | 0.000 | 6.357 |
| Cdk6      | 3.872  | 8.016  | 7.593  | 0.000 | 0.000 | 6.351 |
| Rab12     | 1.905  | 7.057  | 7.592  | 0.000 | 0.000 | 6.350 |
| Sh2d2a    | -1.110 | 3.509  | -7.589 | 0.000 | 0.000 | 6.344 |
| Prss53    | -1.244 | 3.026  | -7.589 | 0.000 | 0.000 | 6.344 |
| Anxa5     | 1.850  | 10.697 | 7.586  | 0.000 | 0.000 | 6.339 |
| Baspl     | 4.340  | 9.960  | 7.585  | 0.000 | 0.000 | 6.336 |
| Mthfd21   | 2.674  | 6.565  | 7.583  | 0.000 | 0.000 | 6.332 |
| Tmem8     | -3.513 | 5.767  | -7.579 | 0.000 | 0.000 | 6.324 |
| 1700020C1 | -3.177 | 5.325  | -7.575 | 0.000 | 0.000 | 6.318 |
| LOC10004z | -8.212 | 7.524  | -7.572 | 0.000 | 0.000 | 6.312 |
| Cyp4f39   | -1.369 | 2.945  | -7.569 | 0.000 | 0.000 | 6.306 |
| Pak2      | 1.742  | 6.072  | 7.568  | 0.000 | 0.000 | 6.305 |
| Chi314    | -4.819 | 4.849  | -7.567 | 0.000 | 0.000 | 6.303 |
| Gstcd     | 1.965  | 6.629  | 7.562  | 0.000 | 0.000 | 6.292 |
| Ch25h     | 1.836  | 4.769  | 7.558  | 0.000 | 0.000 | 6.285 |
| Plekhg3   | 1.633  | 6.222  | 7.557  | 0.000 | 0.000 | 6.283 |
| Lif       | 2.693  | 5.021  | 7.544  | 0.000 | 0.000 | 6.259 |
| Ncf2      | 2.636  | 5.599  | 7.537  | 0.000 | 0.000 | 6.245 |
| Zcchc24   | 3.130  | 6.297  | 7.537  | 0.000 | 0.000 | 6.245 |
| Bid       | 2.585  | 6.813  | 7.537  | 0.000 | 0.000 | 6.245 |
| Fkbp5     | 2.770  | 7.786  | 7.532  | 0.000 | 0.000 | 6.236 |
| Ankrd11   | 1.388  | 8.244  | 7.525  | 0.000 | 0.000 | 6.222 |
| 2510022Dz | -1.352 | 5.086  | -7.524 | 0.000 | 0.000 | 6.220 |
| Arhgef2   | 1.616  | 5.945  | 7.524  | 0.000 | 0.000 | 6.219 |
| Ndufa3    | -1.402 | 10.236 | -7.521 | 0.000 | 0.000 | 6.215 |
| Uqcrfs1   | -1.334 | 10.107 | -7.520 | 0.000 | 0.000 | 6.213 |

|           |        |        |        |       |       |       |
|-----------|--------|--------|--------|-------|-------|-------|
| Kdm5a     | 2.434  | 7.492  | 7.519  | 0.000 | 0.000 | 6.210 |
| Myo9b     | 1.313  | 7.772  | 7.499  | 0.000 | 0.000 | 6.173 |
| Hexb      | 2.908  | 7.767  | 7.493  | 0.000 | 0.000 | 6.160 |
| Zfand2a   | 2.592  | 8.059  | 7.493  | 0.000 | 0.000 | 6.160 |
| Tmem132a  | 1.972  | 5.413  | 7.492  | 0.000 | 0.000 | 6.158 |
| Cd14      | 3.627  | 8.469  | 7.490  | 0.000 | 0.000 | 6.154 |
| Fcgrt     | 2.586  | 6.622  | 7.485  | 0.000 | 0.000 | 6.145 |
| Clasp1    | 1.457  | 4.330  | 7.484  | 0.000 | 0.000 | 6.143 |
| Ankrd37   | 3.389  | 5.291  | 7.484  | 0.000 | 0.000 | 6.142 |
| Enah      | 1.903  | 4.528  | 7.483  | 0.000 | 0.000 | 6.142 |
| E330018Dc | 2.016  | 6.207  | 7.477  | 0.000 | 0.000 | 6.130 |
| Srcap     | 1.493  | 5.451  | 7.476  | 0.000 | 0.000 | 6.128 |
| Nckap11   | 2.217  | 5.585  | 7.470  | 0.000 | 0.000 | 6.115 |
| Gtf3c4    | 1.201  | 6.930  | 7.464  | 0.000 | 0.000 | 6.104 |
| Crlf1     | 3.694  | 6.462  | 7.455  | 0.000 | 0.000 | 6.088 |
| Sox11     | 2.899  | 4.929  | 7.453  | 0.000 | 0.000 | 6.084 |
| Grasp     | 3.483  | 7.628  | 7.450  | 0.000 | 0.000 | 6.078 |
| Ldhb      | -3.479 | 7.894  | -7.448 | 0.000 | 0.000 | 6.074 |
| Pdzn3     | 2.752  | 6.450  | 7.446  | 0.000 | 0.000 | 6.070 |
| Fap       | 2.980  | 5.247  | 7.445  | 0.000 | 0.000 | 6.068 |
| Tmem176a  | 2.803  | 9.067  | 7.443  | 0.000 | 0.000 | 6.063 |
| Nrn1      | 4.926  | 7.755  | 7.441  | 0.000 | 0.000 | 6.061 |
| Ogdh      | -1.945 | 4.726  | -7.441 | 0.000 | 0.000 | 6.060 |
| Hbegf     | 2.567  | 7.750  | 7.434  | 0.000 | 0.000 | 6.047 |
| Hp        | 4.207  | 6.708  | 7.425  | 0.000 | 0.000 | 6.029 |
| Trip6     | 2.431  | 7.792  | 7.425  | 0.000 | 0.000 | 6.029 |
| Ednra     | 1.602  | 4.725  | 7.421  | 0.000 | 0.000 | 6.022 |
| Bckdhb    | -2.882 | 6.854  | -7.416 | 0.000 | 0.000 | 6.013 |
| Gpr124    | 2.447  | 4.614  | 7.416  | 0.000 | 0.000 | 6.011 |
| Zcchc4    | 1.655  | 4.280  | 7.416  | 0.000 | 0.000 | 6.011 |
| Flot1     | 1.374  | 8.122  | 7.415  | 0.000 | 0.000 | 6.010 |
| LOC100047 | -2.601 | 8.265  | -7.413 | 0.000 | 0.000 | 6.007 |
| Rgs2      | 2.532  | 8.045  | 7.411  | 0.000 | 0.000 | 6.002 |
| Thbd      | 1.981  | 5.338  | 7.409  | 0.000 | 0.000 | 5.999 |
| Col12a1   | 2.345  | 5.271  | 7.397  | 0.000 | 0.000 | 5.975 |
| Tmem89    | -1.129 | 4.210  | -7.392 | 0.000 | 0.000 | 5.965 |
| Gpm6b     | 2.565  | 6.147  | 7.388  | 0.000 | 0.000 | 5.957 |
| Dcaf15    | 1.393  | 5.806  | 7.384  | 0.000 | 0.000 | 5.950 |
| Etfb      | -1.485 | 9.416  | -7.378 | 0.000 | 0.000 | 5.939 |
| Ccdc132   | 1.755  | 4.409  | 7.376  | 0.000 | 0.000 | 5.936 |
| Tmem176b  | 2.141  | 10.169 | 7.373  | 0.000 | 0.000 | 5.928 |
| Fgfbp1    | -5.075 | 6.171  | -7.361 | 0.000 | 0.000 | 5.906 |
| Magix     | -1.234 | 3.507  | -7.358 | 0.000 | 0.000 | 5.901 |
| Mef2a     | 2.470  | 7.093  | 7.353  | 0.000 | 0.000 | 5.890 |
| Bex2      | -3.089 | 5.333  | -7.347 | 0.000 | 0.000 | 5.878 |
| Gstt1     | -3.575 | 6.778  | -7.338 | 0.000 | 0.000 | 5.862 |
| Svil      | 2.747  | 7.474  | 7.337  | 0.000 | 0.000 | 5.859 |
| Nras      | 2.378  | 8.312  | 7.333  | 0.000 | 0.000 | 5.850 |
| Pmaip1    | 3.393  | 7.562  | 7.331  | 0.000 | 0.000 | 5.848 |
| Ltbp2     | 3.874  | 5.925  | 7.331  | 0.000 | 0.000 | 5.847 |

|           |        |        |        |       |       |       |
|-----------|--------|--------|--------|-------|-------|-------|
| Ahsg      | -1.247 | 3.316  | -7.329 | 0.000 | 0.000 | 5.844 |
| Ptgs1     | 3.120  | 7.498  | 7.328  | 0.000 | 0.000 | 5.841 |
| 5330426P1 | 2.853  | 4.849  | 7.323  | 0.000 | 0.000 | 5.832 |
| Pilra     | 2.737  | 5.850  | 7.323  | 0.000 | 0.000 | 5.831 |
| Gm7901    | 3.240  | 6.680  | 7.319  | 0.000 | 0.000 | 5.824 |
| Ptpr      | 2.585  | 5.205  | 7.317  | 0.000 | 0.000 | 5.821 |
| Hmgal     | 2.195  | 8.969  | 7.303  | 0.000 | 0.000 | 5.793 |
| Grb2      | 1.142  | 7.154  | 7.297  | 0.000 | 0.000 | 5.781 |
| Pitx1     | -2.315 | 4.225  | -7.297 | 0.000 | 0.000 | 5.781 |
| Epc2      | 1.645  | 7.920  | 7.295  | 0.000 | 0.000 | 5.778 |
| Fbxl12    | 1.530  | 5.972  | 7.294  | 0.000 | 0.000 | 5.775 |
| A930001A2 | -1.523 | 3.282  | -7.292 | 0.000 | 0.000 | 5.771 |
| 2010007HC | -3.371 | 5.606  | -7.289 | 0.000 | 0.000 | 5.766 |
| Flt1      | 2.052  | 5.176  | 7.285  | 0.000 | 0.000 | 5.759 |
| Sh3bgrl3  | 1.876  | 10.633 | 7.284  | 0.000 | 0.000 | 5.755 |
| C3ar1     | 2.580  | 4.513  | 7.283  | 0.000 | 0.000 | 5.754 |
| Penk      | 3.958  | 6.705  | 7.277  | 0.000 | 0.000 | 5.741 |
| Ipo9      | 2.361  | 6.304  | 7.274  | 0.000 | 0.000 | 5.736 |
| Fam189b   | 2.539  | 6.137  | 7.256  | 0.000 | 0.000 | 5.702 |
| Mmp14     | 2.468  | 5.326  | 7.255  | 0.000 | 0.000 | 5.699 |
| Sumo3     | 1.714  | 9.730  | 7.254  | 0.000 | 0.000 | 5.698 |
| 1700022C2 | -1.805 | 5.418  | -7.253 | 0.000 | 0.000 | 5.696 |
| Hspa2     | 1.928  | 6.069  | 7.252  | 0.000 | 0.000 | 5.694 |
| Hk2       | 2.940  | 8.857  | 7.246  | 0.000 | 0.000 | 5.681 |
| E130107B1 | 1.326  | 5.141  | 7.237  | 0.000 | 0.000 | 5.663 |
| Trio      | 2.430  | 6.866  | 7.234  | 0.000 | 0.000 | 5.659 |
| Gm5256    | -2.016 | 8.469  | -7.231 | 0.000 | 0.000 | 5.653 |
| Ptpn12    | 2.865  | 8.995  | 7.227  | 0.000 | 0.000 | 5.644 |
| Sec1414   | -2.587 | 4.466  | -7.223 | 0.000 | 0.000 | 5.637 |
| Tcirgl    | 1.703  | 7.128  | 7.222  | 0.000 | 0.000 | 5.634 |
| Cycs      | -1.399 | 10.384 | -7.219 | 0.000 | 0.000 | 5.629 |
| Hps6      | 1.223  | 4.321  | 7.214  | 0.000 | 0.000 | 5.619 |
| Flnb      | 2.089  | 9.241  | 7.213  | 0.000 | 0.000 | 5.618 |
| Ingl      | 1.527  | 8.482  | 7.210  | 0.000 | 0.000 | 5.612 |
| Spata1    | 1.690  | 4.347  | 7.202  | 0.000 | 0.000 | 5.597 |
| Thap4     | -1.868 | 8.510  | -7.201 | 0.000 | 0.000 | 5.595 |
| 1810013A2 | -1.434 | 4.395  | -7.197 | 0.000 | 0.000 | 5.586 |
| Rai14     | 2.378  | 8.179  | 7.194  | 0.000 | 0.000 | 5.581 |
| Pprc1     | 1.415  | 6.903  | 7.191  | 0.000 | 0.000 | 5.575 |
| Mtvr2     | 2.445  | 7.198  | 7.188  | 0.000 | 0.000 | 5.569 |
| Csf2rb    | 2.433  | 4.739  | 7.188  | 0.000 | 0.000 | 5.568 |
| Syp       | -1.216 | 3.247  | -7.185 | 0.000 | 0.000 | 5.562 |
| H6pd      | 2.705  | 7.966  | 7.177  | 0.000 | 0.000 | 5.547 |
| Add1      | 2.445  | 6.622  | 7.174  | 0.000 | 0.000 | 5.541 |
| C030004M1 | -1.505 | 3.291  | -7.172 | 0.000 | 0.000 | 5.537 |
| Uros      | -1.691 | 6.585  | -7.171 | 0.000 | 0.000 | 5.535 |
| Epn1      | -1.001 | 6.026  | -7.164 | 0.000 | 0.000 | 5.521 |
| Klk1      | -6.099 | 5.371  | -7.161 | 0.000 | 0.000 | 5.516 |
| B9d2      | 1.484  | 5.212  | 7.160  | 0.000 | 0.000 | 5.514 |
| Elac1     | 1.537  | 4.476  | 7.160  | 0.000 | 0.000 | 5.512 |

|           |        |        |        |       |       |       |
|-----------|--------|--------|--------|-------|-------|-------|
| Itgb1     | 2.862  | 9.403  | 7.156  | 0.000 | 0.000 | 5.505 |
| Illr1     | 2.620  | 6.222  | 7.147  | 0.000 | 0.000 | 5.487 |
| Fam129b   | 2.441  | 8.715  | 7.147  | 0.000 | 0.000 | 5.487 |
| Frmd8     | 1.645  | 6.527  | 7.144  | 0.000 | 0.000 | 5.482 |
| Mettl14   | 1.096  | 6.712  | 7.122  | 0.000 | 0.000 | 5.439 |
| 49304150z | -2.883 | 3.710  | -7.119 | 0.000 | 0.000 | 5.433 |
| Gm5101    | -2.038 | 3.486  | -7.108 | 0.000 | 0.000 | 5.410 |
| Eif4ebp1  | 2.107  | 8.612  | 7.107  | 0.000 | 0.000 | 5.409 |
| Mtap4     | 2.278  | 6.987  | 7.107  | 0.000 | 0.000 | 5.409 |
| Dgcr14    | 1.279  | 5.070  | 7.102  | 0.000 | 0.000 | 5.399 |
| Tial      | 1.312  | 7.819  | 7.099  | 0.000 | 0.000 | 5.392 |
| Sdhb      | -1.307 | 10.217 | -7.098 | 0.000 | 0.000 | 5.391 |
| Pfkfb4    | 2.043  | 5.061  | 7.097  | 0.000 | 0.000 | 5.389 |
| Coq4      | -1.471 | 5.783  | -7.089 | 0.000 | 0.000 | 5.374 |
| Pdcd11    | 1.335  | 6.586  | 7.086  | 0.000 | 0.000 | 5.367 |
| Zc3hav11  | 1.916  | 6.079  | 7.081  | 0.000 | 0.000 | 5.358 |
| Gjb4      | 2.748  | 4.555  | 7.079  | 0.000 | 0.000 | 5.353 |
| Zfp513    | 1.053  | 6.544  | 7.077  | 0.000 | 0.000 | 5.351 |
| Ncf4      | 2.776  | 5.607  | 7.072  | 0.000 | 0.000 | 5.340 |
| Prl2c2    | 4.704  | 5.997  | 7.072  | 0.000 | 0.000 | 5.339 |
| Bms1      | 1.358  | 6.970  | 7.071  | 0.000 | 0.000 | 5.338 |
| Cry1      | 1.396  | 5.936  | 7.067  | 0.000 | 0.000 | 5.330 |
| Ttc39c    | 2.015  | 5.540  | 7.065  | 0.000 | 0.000 | 5.327 |
| Pdp2      | -1.248 | 4.867  | -7.065 | 0.000 | 0.000 | 5.326 |
| Arhgef17  | 2.183  | 4.711  | 7.062  | 0.000 | 0.000 | 5.320 |
| Creb311   | -2.396 | 6.458  | -7.045 | 0.000 | 0.000 | 5.286 |
| Tmem47    | 2.001  | 4.494  | 7.041  | 0.000 | 0.000 | 5.279 |
| D3Wsu106e | 1.906  | 5.365  | 7.035  | 0.000 | 0.000 | 5.266 |
| Nudt4     | 2.567  | 7.968  | 7.034  | 0.000 | 0.000 | 5.264 |
| Fgf1      | 2.686  | 5.512  | 7.031  | 0.000 | 0.000 | 5.259 |
| Idh3b     | -1.206 | 9.318  | -7.026 | 0.000 | 0.000 | 5.249 |
| Lsg1      | 1.690  | 7.378  | 7.026  | 0.000 | 0.000 | 5.248 |
| Gcnt1     | 1.077  | 3.972  | 7.025  | 0.000 | 0.000 | 5.247 |
| 1110004F1 | 1.005  | 8.602  | 7.025  | 0.000 | 0.000 | 5.246 |
| Figf      | 1.921  | 4.222  | 7.021  | 0.000 | 0.000 | 5.240 |
| Itga3     | 1.633  | 6.308  | 7.019  | 0.000 | 0.000 | 5.234 |
| Pip5k1a   | 1.926  | 8.277  | 7.017  | 0.000 | 0.000 | 5.231 |
| Zfp566    | 1.862  | 4.797  | 7.017  | 0.000 | 0.000 | 5.231 |
| Pnliprp2  | -3.207 | 4.676  | -7.011 | 0.000 | 0.000 | 5.220 |
| C130051FC | 1.472  | 4.492  | 6.998  | 0.000 | 0.000 | 5.194 |
| Rnase1    | -4.331 | 5.028  | -6.995 | 0.000 | 0.000 | 5.188 |
| Fzd2      | 2.234  | 5.192  | 6.992  | 0.000 | 0.000 | 5.180 |
| Abca9     | 2.220  | 4.577  | 6.986  | 0.000 | 0.000 | 5.170 |
| Tnfsf9    | 2.737  | 5.066  | 6.985  | 0.000 | 0.000 | 5.168 |
| Dlgap4    | 1.236  | 8.295  | 6.983  | 0.000 | 0.000 | 5.164 |
| Sqstm1    | 2.466  | 9.103  | 6.978  | 0.000 | 0.000 | 5.154 |
| Heatr3    | 1.640  | 6.038  | 6.974  | 0.000 | 0.000 | 5.145 |
| Rusc2     | 2.020  | 5.132  | 6.972  | 0.000 | 0.000 | 5.142 |
| Znf512b   | 1.264  | 5.891  | 6.969  | 0.000 | 0.000 | 5.135 |
| Dpp4      | -2.648 | 5.151  | -6.968 | 0.000 | 0.000 | 5.132 |

|           |        |        |        |       |       |       |
|-----------|--------|--------|--------|-------|-------|-------|
| 5730410E1 | -2.939 | 4.237  | -6.963 | 0.000 | 0.000 | 5.124 |
| Pik3ip1   | 2.607  | 5.044  | 6.962  | 0.000 | 0.000 | 5.121 |
| E230008N1 | -1.530 | 3.884  | -6.958 | 0.000 | 0.000 | 5.114 |
| Ms4a4d    | 2.961  | 4.828  | 6.955  | 0.000 | 0.000 | 5.107 |
| Rtn4      | 3.211  | 9.258  | 6.955  | 0.000 | 0.000 | 5.107 |
| Creg1     | -1.629 | 8.727  | -6.954 | 0.000 | 0.000 | 5.105 |
| Tctn2     | 1.175  | 4.448  | 6.950  | 0.000 | 0.000 | 5.098 |
| Abcb6     | -1.936 | 6.578  | -6.946 | 0.000 | 0.000 | 5.090 |
| Uqcrc2    | -1.184 | 10.280 | -6.944 | 0.000 | 0.000 | 5.085 |
| Bcat2     | -2.698 | 5.551  | -6.942 | 0.000 | 0.000 | 5.081 |
| Cd33      | 2.017  | 4.844  | 6.939  | 0.000 | 0.000 | 5.075 |
| Mertk     | 2.204  | 6.000  | 6.935  | 0.000 | 0.000 | 5.069 |
| Rab11fip5 | 2.857  | 6.402  | 6.927  | 0.000 | 0.000 | 5.052 |
| S100a9    | 4.231  | 7.307  | 6.926  | 0.000 | 0.000 | 5.051 |
| Atf5      | 2.373  | 6.063  | 6.924  | 0.000 | 0.000 | 5.045 |
| L3mbt13   | 1.828  | 5.417  | 6.924  | 0.000 | 0.000 | 5.045 |
| 2810432L1 | -3.975 | 6.003  | -6.919 | 0.000 | 0.000 | 5.035 |
| 9430038IC | -1.101 | 5.282  | -6.919 | 0.000 | 0.000 | 5.035 |
| 1700101I1 | -1.194 | 4.007  | -6.917 | 0.000 | 0.000 | 5.031 |
| Oxct1     | -2.931 | 8.344  | -6.917 | 0.000 | 0.000 | 5.031 |
| Rem2      | 2.412  | 5.461  | 6.914  | 0.000 | 0.000 | 5.026 |
| Rnf145    | 2.673  | 7.169  | 6.911  | 0.000 | 0.000 | 5.020 |
| Gm14176   | 1.131  | 9.749  | 6.910  | 0.000 | 0.000 | 5.018 |
| Zfp322a   | 1.584  | 6.108  | 6.909  | 0.000 | 0.000 | 5.016 |
| Ndufab1   | -1.159 | 10.504 | -6.908 | 0.000 | 0.000 | 5.014 |
| Lgi2      | 2.053  | 5.572  | 6.908  | 0.000 | 0.000 | 5.013 |
| Patz1     | 1.771  | 6.391  | 6.907  | 0.000 | 0.000 | 5.012 |
| 5330431KC | 1.801  | 4.563  | 6.906  | 0.000 | 0.000 | 5.010 |
| Suv39h1   | 3.063  | 6.027  | 6.906  | 0.000 | 0.000 | 5.009 |
| LOC632075 | -4.103 | 5.085  | -6.904 | 0.000 | 0.000 | 5.005 |
| Usp20     | 1.827  | 5.475  | 6.904  | 0.000 | 0.000 | 5.005 |
| Rab31     | 2.631  | 8.154  | 6.903  | 0.000 | 0.000 | 5.003 |
| Pitpnb    | 1.610  | 6.635  | 6.902  | 0.000 | 0.000 | 5.001 |
| Lyz2      | 4.577  | 9.710  | 6.900  | 0.000 | 0.000 | 4.997 |
| Mpst      | -3.686 | 5.102  | -6.896 | 0.000 | 0.000 | 4.990 |
| BB114814  | -1.398 | 3.191  | -6.891 | 0.000 | 0.000 | 4.980 |
| Kctd10    | 2.162  | 8.946  | 6.890  | 0.000 | 0.000 | 4.977 |
| Tmx2      | -1.563 | 8.905  | -6.886 | 0.000 | 0.000 | 4.971 |
| Tgfb2     | 2.666  | 5.234  | 6.882  | 0.000 | 0.000 | 4.961 |
| Lhx5      | -1.286 | 3.271  | -6.881 | 0.000 | 0.000 | 4.960 |
| Plxnb1    | 2.079  | 5.284  | 6.881  | 0.000 | 0.000 | 4.959 |
| Sema3a    | 3.190  | 5.722  | 6.877  | 0.000 | 0.000 | 4.951 |
| Ccng2     | 2.756  | 8.144  | 6.876  | 0.000 | 0.000 | 4.949 |
| Cx3c11    | 1.820  | 6.204  | 6.873  | 0.000 | 0.000 | 4.944 |
| Mirhg1    | 2.096  | 5.887  | 6.872  | 0.000 | 0.000 | 4.941 |
| Ier5      | 1.554  | 7.021  | 6.869  | 0.000 | 0.000 | 4.936 |
| Coq7      | -1.454 | 8.269  | -6.868 | 0.000 | 0.000 | 4.933 |
| Pds5b     | 2.147  | 5.567  | 6.865  | 0.000 | 0.000 | 4.928 |
| Tcf3      | 2.141  | 6.934  | 6.863  | 0.000 | 0.000 | 4.924 |
| Lphn1     | 2.338  | 5.367  | 6.861  | 0.000 | 0.000 | 4.921 |

|           |        |        |        |       |       |       |
|-----------|--------|--------|--------|-------|-------|-------|
| Pid1      | 2.483  | 5.653  | 6.857  | 0.000 | 0.000 | 4.911 |
| Pbx2      | 1.341  | 6.115  | 6.854  | 0.000 | 0.000 | 4.905 |
| Pamr1     | 3.256  | 5.629  | 6.853  | 0.000 | 0.000 | 4.904 |
| S100a4    | 4.841  | 8.098  | 6.850  | 0.000 | 0.000 | 4.897 |
| Vsig1     | -2.929 | 4.721  | -6.849 | 0.000 | 0.000 | 4.895 |
| Zfp826    | 1.561  | 5.842  | 6.847  | 0.000 | 0.000 | 4.892 |
| Dnajc15   | -1.891 | 8.260  | -6.843 | 0.000 | 0.000 | 4.883 |
| Fam69a    | 2.049  | 6.325  | 6.842  | 0.000 | 0.000 | 4.881 |
| Xpc       | 2.387  | 6.241  | 6.841  | 0.000 | 0.000 | 4.879 |
| Hltf      | 1.247  | 3.854  | 6.840  | 0.000 | 0.000 | 4.878 |
| Ldlrap1   | 1.741  | 6.183  | 6.836  | 0.000 | 0.000 | 4.868 |
| Cyth3     | 1.713  | 7.788  | 6.831  | 0.000 | 0.000 | 4.860 |
| Prkg2     | 1.414  | 3.885  | 6.829  | 0.000 | 0.000 | 4.855 |
| Nelf      | 1.318  | 9.529  | 6.825  | 0.000 | 0.000 | 4.848 |
| Tnni3     | -5.174 | 4.958  | -6.821 | 0.000 | 0.000 | 4.839 |
| Pm20d1    | -1.626 | 3.910  | -6.817 | 0.000 | 0.000 | 4.831 |
| LOC10004  | 1.006  | 8.335  | 6.816  | 0.000 | 0.000 | 4.829 |
| Rdh7      | -3.826 | 4.338  | -6.815 | 0.000 | 0.000 | 4.828 |
| Ncor2     | 2.129  | 7.389  | 6.815  | 0.000 | 0.000 | 4.827 |
| Coll4a1   | 2.242  | 5.274  | 6.813  | 0.000 | 0.000 | 4.822 |
| Eng       | 1.487  | 5.604  | 6.808  | 0.000 | 0.000 | 4.814 |
| Mier1     | 1.465  | 7.378  | 6.806  | 0.000 | 0.000 | 4.810 |
| Cd3e      | -1.263 | 4.752  | -6.805 | 0.000 | 0.000 | 4.807 |
| Vegfc     | 2.649  | 5.318  | 6.802  | 0.000 | 0.000 | 4.800 |
| Rundc3b   | 3.229  | 5.887  | 6.799  | 0.000 | 0.000 | 4.795 |
| Pnliprp1  | -4.344 | 4.944  | -6.797 | 0.000 | 0.000 | 4.792 |
| Cyp27b1   | -1.208 | 3.132  | -6.795 | 0.000 | 0.000 | 4.787 |
| Guk1      | -1.459 | 8.261  | -6.790 | 0.000 | 0.000 | 4.776 |
| Rhoq      | 2.694  | 8.469  | 6.789  | 0.000 | 0.000 | 4.775 |
| Wfdc2     | 3.559  | 10.194 | 6.784  | 0.000 | 0.000 | 4.766 |
| Pcdhb17   | 1.126  | 3.940  | 6.781  | 0.000 | 0.000 | 4.758 |
| Ndufa10   | -1.514 | 3.845  | -6.779 | 0.000 | 0.000 | 4.756 |
| Chst4     | -3.718 | 4.457  | -6.777 | 0.000 | 0.000 | 4.751 |
| Mfsd10    | 1.609  | 6.649  | 6.774  | 0.000 | 0.000 | 4.745 |
| Cckbr     | -2.157 | 3.766  | -6.770 | 0.000 | 0.000 | 4.736 |
| A630072M1 | 1.321  | 3.766  | 6.767  | 0.000 | 0.000 | 4.731 |
| Gstk1     | -3.672 | 7.179  | -6.766 | 0.000 | 0.000 | 4.728 |
| Anxa2     | 2.340  | 11.778 | 6.766  | 0.000 | 0.000 | 4.728 |
| D15Wsu12t | 2.043  | 6.134  | 6.762  | 0.000 | 0.000 | 4.720 |
| Slfn2     | 2.476  | 7.008  | 6.760  | 0.000 | 0.000 | 4.716 |
| Taf1a     | 1.465  | 5.158  | 6.760  | 0.000 | 0.000 | 4.716 |
| Psm4      | 1.192  | 10.336 | 6.759  | 0.000 | 0.000 | 4.715 |
| Rgs10     | 2.008  | 5.674  | 6.758  | 0.000 | 0.000 | 4.712 |
| Cfp       | 3.178  | 5.804  | 6.756  | 0.000 | 0.000 | 4.707 |
| Wdr19     | 1.834  | 4.755  | 6.751  | 0.000 | 0.000 | 4.698 |
| Lyz1      | 4.000  | 10.698 | 6.748  | 0.000 | 0.000 | 4.692 |
| Fam115a   | 1.435  | 6.128  | 6.747  | 0.000 | 0.000 | 4.691 |
| Traf3     | 1.302  | 7.099  | 6.743  | 0.000 | 0.000 | 4.682 |
| L3mbt12   | -1.001 | 4.976  | -6.743 | 0.000 | 0.000 | 4.682 |
| Esyt2     | 1.712  | 7.386  | 6.743  | 0.000 | 0.000 | 4.681 |

|           |        |       |        |       |       |       |
|-----------|--------|-------|--------|-------|-------|-------|
| D1Ert564  | 2.303  | 4.859 | 6.741  | 0.000 | 0.000 | 4.677 |
| Gpr153    | 2.042  | 4.731 | 6.740  | 0.000 | 0.000 | 4.677 |
| Stx1a     | 2.397  | 6.912 | 6.737  | 0.000 | 0.000 | 4.670 |
| Csf2rb2   | 2.419  | 5.051 | 6.733  | 0.000 | 0.000 | 4.661 |
| 5430407P1 | -1.308 | 3.535 | -6.732 | 0.000 | 0.000 | 4.660 |
| Nsf11c    | 1.398  | 9.241 | 6.730  | 0.000 | 0.000 | 4.656 |
| Igfbp4    | 2.741  | 5.626 | 6.728  | 0.000 | 0.000 | 4.651 |
| Gsdmc2    | -3.699 | 4.524 | -6.728 | 0.000 | 0.000 | 4.651 |
| Chst14    | 1.732  | 5.587 | 6.726  | 0.000 | 0.000 | 4.647 |
| Fam101a   | -2.728 | 6.777 | -6.724 | 0.000 | 0.000 | 4.644 |
| Lix1      | -1.361 | 3.681 | -6.722 | 0.000 | 0.000 | 4.640 |
| 5430434G1 | 2.261  | 5.852 | 6.722  | 0.000 | 0.000 | 4.639 |
| Ccl28     | -1.295 | 3.967 | -6.719 | 0.000 | 0.000 | 4.633 |
| Cd53      | 3.938  | 8.268 | 6.707  | 0.000 | 0.000 | 4.608 |
| Siah1a    | 1.577  | 4.803 | 6.701  | 0.000 | 0.000 | 4.598 |
| Bmpr2     | 1.680  | 4.162 | 6.701  | 0.000 | 0.000 | 4.597 |
| Evi5      | 1.929  | 7.252 | 6.699  | 0.000 | 0.000 | 4.593 |
| Plscr3    | 1.633  | 5.889 | 6.698  | 0.000 | 0.000 | 4.591 |
| Dsel      | 2.232  | 6.360 | 6.698  | 0.000 | 0.000 | 4.590 |
| Agfgl1    | 1.015  | 6.454 | 6.698  | 0.000 | 0.000 | 4.590 |
| Cpeb1     | 1.841  | 4.553 | 6.697  | 0.000 | 0.000 | 4.589 |
| Rab24     | 1.777  | 7.653 | 6.697  | 0.000 | 0.000 | 4.589 |
| Entpd1    | 1.791  | 3.771 | 6.696  | 0.000 | 0.000 | 4.588 |
| Snapc2    | 1.286  | 8.558 | 6.692  | 0.000 | 0.000 | 4.580 |
| Zfp408    | 1.509  | 4.790 | 6.690  | 0.000 | 0.000 | 4.575 |
| Lcp2      | 1.869  | 5.187 | 6.684  | 0.000 | 0.000 | 4.561 |
| Rassf5    | 1.823  | 4.688 | 6.682  | 0.000 | 0.000 | 4.559 |
| Kctd5     | 1.689  | 6.956 | 6.679  | 0.000 | 0.000 | 4.552 |
| BC029214  | -1.128 | 3.930 | -6.676 | 0.000 | 0.000 | 4.546 |
| B230213L1 | 1.184  | 4.327 | 6.674  | 0.000 | 0.000 | 4.542 |
| Spib      | -1.940 | 4.239 | -6.672 | 0.000 | 0.000 | 4.538 |
| Ttpal     | 1.726  | 5.659 | 6.667  | 0.000 | 0.000 | 4.528 |
| Mrpl54    | -1.254 | 7.120 | -6.666 | 0.000 | 0.000 | 4.527 |
| LOC100038 | 1.497  | 4.177 | 6.654  | 0.000 | 0.000 | 4.501 |
| Gkap1     | 2.461  | 6.243 | 6.652  | 0.000 | 0.000 | 4.498 |
| Ddah1     | 3.637  | 5.978 | 6.651  | 0.000 | 0.000 | 4.495 |
| Arpc4     | 2.189  | 8.277 | 6.649  | 0.000 | 0.000 | 4.491 |
| Kcnj15    | -4.205 | 5.585 | -6.648 | 0.000 | 0.000 | 4.490 |
| Tnip1     | 1.739  | 7.431 | 6.646  | 0.000 | 0.000 | 4.486 |
| Fam168b   | 1.293  | 7.800 | 6.645  | 0.000 | 0.000 | 4.484 |
| Tubgcp4   | 1.277  | 4.919 | 6.644  | 0.000 | 0.000 | 4.482 |
| Ahctf1    | 1.676  | 7.634 | 6.643  | 0.000 | 0.000 | 4.479 |
| BB163080  | 1.485  | 3.851 | 6.640  | 0.000 | 0.000 | 4.474 |
| Prickle2  | 1.870  | 4.626 | 6.640  | 0.000 | 0.000 | 4.474 |
| AF251705  | 2.080  | 5.520 | 6.638  | 0.000 | 0.000 | 4.469 |
| Ppap2b    | 3.106  | 8.151 | 6.636  | 0.000 | 0.000 | 4.465 |
| 4921511E1 | 1.046  | 4.206 | 6.633  | 0.000 | 0.000 | 4.459 |
| Stoml1    | 1.527  | 5.653 | 6.632  | 0.000 | 0.000 | 4.458 |
| Fos       | -2.790 | 9.851 | -6.632 | 0.000 | 0.000 | 4.457 |
| Ccdc102a  | 2.170  | 5.292 | 6.631  | 0.000 | 0.000 | 4.455 |



|          |        |       |        |       |       |       |
|----------|--------|-------|--------|-------|-------|-------|
| Mocs1    | -1.601 | 3.764 | -6.629 | 0.000 | 0.000 | 4.451 |
| Arx      | -1.166 | 3.164 | -6.627 | 0.000 | 0.000 | 4.446 |
| C2       | 2.383  | 4.703 | 6.626  | 0.000 | 0.000 | 4.445 |
| Csf2ra   | 1.930  | 4.868 | 6.625  | 0.000 | 0.000 | 4.442 |
| Heg1     | 1.140  | 4.043 | 6.620  | 0.000 | 0.000 | 4.433 |
| Cflar    | 2.354  | 7.263 | 6.620  | 0.000 | 0.000 | 4.432 |
| A430108E | 2.426  | 6.867 | 6.618  | 0.000 | 0.000 | 4.428 |
| Capzb    | 1.433  | 9.943 | 6.616  | 0.000 | 0.000 | 4.424 |
| Kcnj16   | -3.702 | 3.943 | -6.610 | 0.000 | 0.000 | 4.412 |
| 0610011F | -1.803 | 8.264 | -6.609 | 0.000 | 0.000 | 4.410 |
| 6430527G | 1.582  | 5.631 | 6.608  | 0.000 | 0.000 | 4.408 |
| Plxnd1   | 2.246  | 6.427 | 6.606  | 0.000 | 0.000 | 4.405 |
| Ewsr1    | 2.208  | 7.488 | 6.600  | 0.000 | 0.000 | 4.392 |
| Dnajc12  | -1.675 | 6.569 | -6.599 | 0.000 | 0.000 | 4.389 |
| Uqcrb    | -1.414 | 9.879 | -6.598 | 0.000 | 0.000 | 4.388 |
| Gstm3    | -2.278 | 3.470 | -6.596 | 0.000 | 0.000 | 4.383 |
| Gmfb     | 2.626  | 6.442 | 6.595  | 0.000 | 0.000 | 4.381 |
| Zfp777   | 1.002  | 4.682 | 6.593  | 0.000 | 0.000 | 4.378 |
| Csnk1d   | 1.902  | 7.377 | 6.593  | 0.000 | 0.000 | 4.377 |
| Lamb2    | 2.243  | 5.827 | 6.592  | 0.000 | 0.000 | 4.375 |
| Brp441   | -1.675 | 9.465 | -6.590 | 0.000 | 0.000 | 4.372 |
| Sult1a1  | 2.103  | 7.053 | 6.586  | 0.000 | 0.000 | 4.364 |
| Klc1     | 1.715  | 6.608 | 6.579  | 0.000 | 0.000 | 4.349 |
| Trps1    | 2.368  | 4.392 | 6.578  | 0.000 | 0.000 | 4.346 |
| Aldh6a1  | -2.350 | 8.141 | -6.577 | 0.000 | 0.000 | 4.345 |
| 5230400M | 1.600  | 6.369 | 6.575  | 0.000 | 0.000 | 4.340 |
| Mrpl55   | -1.150 | 7.312 | -6.575 | 0.000 | 0.000 | 4.340 |
| C80998   | 1.074  | 6.257 | 6.573  | 0.000 | 0.000 | 4.337 |
| Eif4e3   | 2.062  | 5.759 | 6.572  | 0.000 | 0.000 | 4.333 |
| Prss22   | 4.567  | 6.949 | 6.568  | 0.000 | 0.000 | 4.326 |
| Gpld1    | -1.681 | 4.770 | -6.563 | 0.000 | 0.000 | 4.315 |
| Akr1c14  | -5.009 | 5.759 | -6.561 | 0.000 | 0.000 | 4.311 |
| Rpp21    | -1.104 | 8.546 | -6.558 | 0.000 | 0.000 | 4.307 |
| Lrrc8d   | 1.436  | 6.471 | 6.558  | 0.000 | 0.000 | 4.305 |
| Clra     | 1.721  | 4.800 | 6.556  | 0.000 | 0.000 | 4.301 |
| Entpd5   | -2.703 | 6.310 | -6.553 | 0.000 | 0.000 | 4.296 |
| Rbm12    | 1.500  | 7.171 | 6.553  | 0.000 | 0.000 | 4.296 |
| Rbms3    | 2.061  | 5.260 | 6.552  | 0.000 | 0.000 | 4.294 |
| Amot11   | 2.435  | 7.921 | 6.549  | 0.000 | 0.000 | 4.288 |
| BC018507 | 1.509  | 6.454 | 6.545  | 0.000 | 0.000 | 4.279 |
| Prg4     | 3.792  | 5.178 | 6.544  | 0.000 | 0.000 | 4.276 |
| Ly6a     | 3.806  | 8.749 | 6.541  | 0.000 | 0.000 | 4.270 |
| Dusp6    | 1.670  | 9.674 | 6.540  | 0.000 | 0.000 | 4.268 |
| Slc24a6  | 1.549  | 6.079 | 6.540  | 0.000 | 0.000 | 4.268 |
| Ccdc150  | -1.292 | 3.597 | -6.538 | 0.000 | 0.000 | 4.265 |
| Zfyve26  | 2.042  | 5.402 | 6.535  | 0.000 | 0.000 | 4.260 |
| Leprel   | 1.347  | 4.240 | 6.534  | 0.000 | 0.000 | 4.256 |
| 6720463M | 1.286  | 5.625 | 6.531  | 0.000 | 0.000 | 4.251 |
| Mdfic    | 2.640  | 7.995 | 6.525  | 0.000 | 0.000 | 4.237 |
| Serpinf2 | -1.629 | 4.210 | -6.524 | 0.000 | 0.000 | 4.236 |

|           |        |        |        |       |       |       |
|-----------|--------|--------|--------|-------|-------|-------|
| Lamc1     | 2.217  | 6.933  | 6.518  | 0.000 | 0.000 | 4.225 |
| Kpnb1     | 1.667  | 8.143  | 6.518  | 0.000 | 0.000 | 4.224 |
| H2-Ab1    | 2.784  | 5.756  | 6.515  | 0.000 | 0.000 | 4.218 |
| Tubb2a    | 2.736  | 7.828  | 6.514  | 0.000 | 0.000 | 4.215 |
| Fa2h      | -4.271 | 5.133  | -6.513 | 0.000 | 0.000 | 4.213 |
| Vasn      | 1.731  | 6.261  | 6.512  | 0.000 | 0.000 | 4.212 |
| Slc29a1   | 2.654  | 6.562  | 6.512  | 0.000 | 0.000 | 4.211 |
| Vangl1    | 1.394  | 5.931  | 6.511  | 0.000 | 0.000 | 4.210 |
| Zcchc14   | 1.919  | 7.277  | 6.510  | 0.000 | 0.000 | 4.208 |
| Cdkn2aipr | 1.903  | 7.544  | 6.509  | 0.000 | 0.000 | 4.204 |
| Ccdc88a   | 2.025  | 4.375  | 6.505  | 0.000 | 0.000 | 4.196 |
| Ccni      | 1.036  | 11.003 | 6.503  | 0.000 | 0.000 | 4.194 |
| Hmgb3     | 1.896  | 8.420  | 6.500  | 0.000 | 0.000 | 4.186 |
| Pdzd11    | -1.037 | 7.832  | -6.499 | 0.000 | 0.000 | 4.185 |
| Zc3hc1    | 1.288  | 6.069  | 6.496  | 0.000 | 0.000 | 4.180 |
| DOH4S114  | 2.776  | 6.678  | 6.491  | 0.000 | 0.000 | 4.168 |
| Tead2     | 2.632  | 6.371  | 6.491  | 0.000 | 0.000 | 4.168 |
| Grhl1     | -2.237 | 4.537  | -6.489 | 0.000 | 0.000 | 4.165 |
| Sdc1      | 2.038  | 9.970  | 6.485  | 0.000 | 0.000 | 4.157 |
| D2Ertd61z | 1.719  | 6.385  | 6.485  | 0.000 | 0.000 | 4.156 |
| Nudt13    | -1.587 | 5.245  | -6.481 | 0.000 | 0.000 | 4.148 |
| Man1a2    | 1.460  | 4.298  | 6.481  | 0.000 | 0.000 | 4.147 |
| Atf3      | -2.652 | 7.346  | -6.479 | 0.000 | 0.000 | 4.144 |
| Nfatc1    | 1.145  | 5.625  | 6.478  | 0.000 | 0.000 | 4.142 |
| Prss12    | 4.115  | 6.033  | 6.475  | 0.000 | 0.000 | 4.135 |
| Cenpt     | 1.744  | 6.411  | 6.472  | 0.000 | 0.000 | 4.130 |
| Rbm20     | -2.346 | 4.640  | -6.470 | 0.000 | 0.000 | 4.125 |
| Gm10786   | 1.472  | 7.192  | 6.469  | 0.000 | 0.000 | 4.124 |
| Ifnar1    | 1.557  | 5.376  | 6.467  | 0.000 | 0.000 | 4.119 |
| Rsph3a    | -1.037 | 8.530  | -6.465 | 0.000 | 0.000 | 4.116 |
| Timp2     | 3.556  | 4.857  | 6.462  | 0.000 | 0.000 | 4.108 |
| Vgll2     | -1.018 | 3.197  | -6.458 | 0.000 | 0.000 | 4.100 |
| Wsb1      | 2.241  | 7.709  | 6.451  | 0.000 | 0.000 | 4.085 |
| Zfp451    | 1.683  | 5.999  | 6.449  | 0.000 | 0.000 | 4.082 |
| Impact    | 2.236  | 6.966  | 6.449  | 0.000 | 0.000 | 4.082 |
| Pnpla7    | 1.499  | 5.416  | 6.449  | 0.000 | 0.000 | 4.081 |
| 583043611 | 1.608  | 5.088  | 6.447  | 0.000 | 0.000 | 4.078 |
| Smtn      | 2.203  | 4.957  | 6.445  | 0.000 | 0.000 | 4.075 |
| B230216Nz | 1.198  | 4.235  | 6.445  | 0.000 | 0.000 | 4.073 |
| Kctd13    | 1.113  | 5.409  | 6.443  | 0.000 | 0.000 | 4.069 |
| Slc2a10   | -2.015 | 4.225  | -6.442 | 0.000 | 0.000 | 4.067 |
| Cast      | 2.002  | 7.001  | 6.440  | 0.000 | 0.000 | 4.063 |
| Mecr      | -1.677 | 6.291  | -6.439 | 0.000 | 0.000 | 4.060 |
| Tacc2     | 2.151  | 8.533  | 6.438  | 0.000 | 0.000 | 4.059 |
| Wwc2      | 2.178  | 6.424  | 6.435  | 0.000 | 0.000 | 4.052 |
| Cox7a1    | -4.122 | 6.188  | -6.433 | 0.000 | 0.000 | 4.050 |
| Adap2     | 1.105  | 4.675  | 6.432  | 0.000 | 0.000 | 4.046 |
| 5530402H2 | 1.510  | 4.406  | 6.431  | 0.000 | 0.000 | 4.046 |
| Cd38      | 2.777  | 7.325  | 6.431  | 0.000 | 0.000 | 4.046 |
| Bcl6      | 1.883  | 5.892  | 6.430  | 0.000 | 0.000 | 4.044 |

|           |        |       |        |       |       |       |
|-----------|--------|-------|--------|-------|-------|-------|
| Adora1    | -1.195 | 3.331 | -6.429 | 0.000 | 0.000 | 4.041 |
| Lhpp      | -1.423 | 4.506 | -6.427 | 0.000 | 0.000 | 4.036 |
| I810055G  | 1.534  | 7.119 | 6.416  | 0.000 | 0.000 | 4.014 |
| Rgs13     | -2.990 | 3.811 | -6.416 | 0.000 | 0.000 | 4.014 |
| 1110032AC | -1.384 | 7.289 | -6.414 | 0.000 | 0.000 | 4.011 |
| Gpr137b   | 1.250  | 5.613 | 6.411  | 0.000 | 0.000 | 4.004 |
| 4930503L1 | 2.357  | 4.445 | 6.410  | 0.000 | 0.000 | 4.002 |
| Staul     | 1.044  | 7.208 | 6.409  | 0.000 | 0.000 | 4.000 |
| Cerk      | 2.297  | 6.362 | 6.407  | 0.000 | 0.000 | 3.995 |
| Prmt1     | 1.937  | 9.053 | 6.406  | 0.000 | 0.000 | 3.994 |
| Man1c1    | 2.050  | 6.264 | 6.404  | 0.000 | 0.000 | 3.990 |
| A930035DC | 1.644  | 4.561 | 6.394  | 0.000 | 0.000 | 3.969 |
| Zbtb12    | 1.565  | 4.788 | 6.394  | 0.000 | 0.000 | 3.968 |
| 9430020KC | 2.356  | 6.260 | 6.394  | 0.000 | 0.000 | 3.968 |
| Vash2     | 2.421  | 4.713 | 6.386  | 0.000 | 0.000 | 3.951 |
| Aida      | 1.965  | 7.737 | 6.384  | 0.000 | 0.000 | 3.948 |
| Plekha5   | 1.239  | 6.083 | 6.383  | 0.000 | 0.000 | 3.945 |
| Tst       | -3.289 | 7.078 | -6.381 | 0.000 | 0.000 | 3.942 |
| Kdm5b     | 1.739  | 5.164 | 6.381  | 0.000 | 0.000 | 3.941 |
| AA414768  | 2.340  | 3.999 | 6.380  | 0.000 | 0.000 | 3.940 |
| Ear2      | 4.141  | 6.554 | 6.372  | 0.000 | 0.000 | 3.924 |
| Osbpl11   | 1.639  | 6.449 | 6.368  | 0.000 | 0.000 | 3.915 |
| 94300811E | 1.579  | 4.451 | 6.367  | 0.000 | 0.000 | 3.912 |
| Myolc     | 1.893  | 6.495 | 6.366  | 0.000 | 0.000 | 3.910 |
| Pld2      | 1.199  | 7.030 | 6.364  | 0.000 | 0.000 | 3.907 |
| Dhx38     | 1.200  | 6.189 | 6.362  | 0.000 | 0.000 | 3.903 |
| Asns      | -2.460 | 8.707 | -6.362 | 0.000 | 0.000 | 3.902 |
| Acot13    | -1.338 | 9.400 | -6.360 | 0.000 | 0.000 | 3.899 |
| Nisch     | 1.433  | 5.444 | 6.360  | 0.000 | 0.000 | 3.897 |
| Abhd14b   | -1.513 | 7.976 | -6.358 | 0.000 | 0.000 | 3.895 |
| LOC100047 | 1.604  | 6.237 | 6.357  | 0.000 | 0.000 | 3.892 |
| Rftn1     | 2.180  | 5.595 | 6.353  | 0.000 | 0.000 | 3.884 |
| Blcap     | 1.472  | 8.140 | 6.353  | 0.000 | 0.000 | 3.883 |
| Megf8     | 1.316  | 6.790 | 6.351  | 0.000 | 0.000 | 3.879 |
| Lpxn      | 2.079  | 4.836 | 6.348  | 0.000 | 0.000 | 3.872 |
| Efemp1    | 2.506  | 6.425 | 6.346  | 0.000 | 0.000 | 3.869 |
| Ihh       | -2.336 | 4.752 | -6.346 | 0.000 | 0.000 | 3.869 |
| Hspa8     | -1.987 | 6.596 | -6.346 | 0.000 | 0.000 | 3.868 |
| 4921509J1 | 2.346  | 5.947 | 6.344  | 0.000 | 0.000 | 3.864 |
| Snx8      | 1.586  | 5.759 | 6.343  | 0.000 | 0.000 | 3.862 |
| Zfyvel6   | 1.650  | 5.213 | 6.341  | 0.000 | 0.000 | 3.858 |
| Neb1      | 2.923  | 5.258 | 6.340  | 0.000 | 0.000 | 3.857 |
| 5930405FC | 1.672  | 5.109 | 6.337  | 0.000 | 0.000 | 3.850 |
| Pold4     | 2.363  | 7.239 | 6.334  | 0.000 | 0.000 | 3.844 |
| Slc40a1   | 2.510  | 6.277 | 6.334  | 0.000 | 0.000 | 3.843 |
| AU020094  | -1.668 | 4.641 | -6.334 | 0.000 | 0.000 | 3.843 |
| Resp18    | -4.647 | 4.864 | -6.333 | 0.000 | 0.000 | 3.842 |
| Tm4sf1    | 3.275  | 4.997 | 6.333  | 0.000 | 0.000 | 3.841 |
| Sfrp1     | 2.228  | 4.913 | 6.328  | 0.000 | 0.000 | 3.831 |
| Reep1     | 1.578  | 3.993 | 6.325  | 0.000 | 0.000 | 3.826 |

|           |        |        |        |       |       |       |
|-----------|--------|--------|--------|-------|-------|-------|
| 1110002LC | 1.014  | 4.990  | 6.325  | 0.000 | 0.000 | 3.824 |
| Blmh      | -1.029 | 8.019  | -6.323 | 0.000 | 0.000 | 3.821 |
| Gstm2     | -2.423 | 8.156  | -6.322 | 0.000 | 0.000 | 3.819 |
| Pafah2    | -1.521 | 8.155  | -6.317 | 0.000 | 0.000 | 3.809 |
| Stx19     | -3.442 | 4.717  | -6.315 | 0.000 | 0.000 | 3.805 |
| Ttc38     | -1.292 | 5.092  | -6.314 | 0.000 | 0.000 | 3.802 |
| Cbl       | 1.650  | 7.518  | 6.312  | 0.000 | 0.000 | 3.798 |
| Sult1c2   | -5.863 | 7.569  | -6.311 | 0.000 | 0.000 | 3.796 |
| Zfp74     | 1.400  | 4.897  | 6.310  | 0.000 | 0.000 | 3.794 |
| Ano1      | 1.833  | 6.793  | 6.310  | 0.000 | 0.000 | 3.793 |
| Ptbp2     | 2.605  | 7.502  | 6.309  | 0.000 | 0.000 | 3.793 |
| Acsf2     | -1.413 | 5.631  | -6.307 | 0.000 | 0.000 | 3.788 |
| Cda       | 2.327  | 6.385  | 6.307  | 0.000 | 0.000 | 3.787 |
| Etfa      | -1.205 | 9.720  | -6.305 | 0.000 | 0.000 | 3.784 |
| Creld1    | 1.925  | 6.210  | 6.305  | 0.000 | 0.000 | 3.783 |
| Zmym4     | 1.696  | 6.201  | 6.304  | 0.000 | 0.000 | 3.782 |
| Ephb4     | 1.373  | 6.228  | 6.299  | 0.000 | 0.000 | 3.771 |
| Pla2g4c   | -2.159 | 3.822  | -6.297 | 0.000 | 0.000 | 3.767 |
| Tuft1     | 2.568  | 7.143  | 6.295  | 0.000 | 0.000 | 3.764 |
| Pvr       | 1.764  | 6.134  | 6.289  | 0.000 | 0.000 | 3.750 |
| Serpinb6ε | 2.812  | 10.089 | 6.287  | 0.000 | 0.000 | 3.747 |
| Nudt16l1  | 1.603  | 6.423  | 6.285  | 0.000 | 0.000 | 3.743 |
| 4933421E1 | 2.200  | 6.782  | 6.285  | 0.000 | 0.000 | 3.742 |
| Ino80d    | 1.364  | 7.458  | 6.284  | 0.000 | 0.000 | 3.740 |
| Gm14057   | -1.044 | 4.722  | -6.281 | 0.000 | 0.000 | 3.733 |
| Lgmn      | 3.170  | 8.244  | 6.279  | 0.000 | 0.000 | 3.730 |
| Atg4d     | -1.261 | 7.090  | -6.279 | 0.000 | 0.000 | 3.730 |
| Camk2g    | 1.030  | 7.180  | 6.279  | 0.000 | 0.000 | 3.730 |
| Dusp5     | 1.978  | 7.743  | 6.278  | 0.000 | 0.000 | 3.727 |
| Frrs1     | 1.415  | 8.117  | 6.278  | 0.000 | 0.000 | 3.727 |
| 9030607L2 | 1.254  | 4.983  | 6.276  | 0.000 | 0.000 | 3.723 |
| Coll5a1   | 1.771  | 4.534  | 6.271  | 0.000 | 0.000 | 3.713 |
| Pmch      | -1.003 | 3.087  | -6.270 | 0.000 | 0.000 | 3.712 |
| Trpc7     | -1.043 | 3.424  | -6.269 | 0.000 | 0.000 | 3.708 |
| Phtf1     | 1.831  | 6.688  | 6.265  | 0.000 | 0.000 | 3.702 |
| 8430419LC | -2.632 | 5.771  | -6.265 | 0.000 | 0.000 | 3.700 |
| Kcnj8     | 2.622  | 5.551  | 6.263  | 0.000 | 0.000 | 3.697 |
| Wnk2      | -1.321 | 3.673  | -6.261 | 0.000 | 0.000 | 3.691 |
| Camk2n1   | 2.844  | 5.815  | 6.258  | 0.000 | 0.000 | 3.686 |
| 2200002DC | 1.742  | 8.684  | 6.258  | 0.000 | 0.000 | 3.685 |
| Cd1d1     | 2.087  | 5.274  | 6.250  | 0.000 | 0.000 | 3.670 |
| Mon1a     | -1.607 | 7.063  | -6.244 | 0.000 | 0.000 | 3.658 |
| Ildr2     | 2.974  | 4.752  | 6.242  | 0.000 | 0.000 | 3.652 |
| Skil      | 1.898  | 4.746  | 6.242  | 0.000 | 0.000 | 3.652 |
| Npr2      | 1.653  | 5.046  | 6.241  | 0.000 | 0.000 | 3.651 |
| Mmp9      | 2.315  | 5.063  | 6.241  | 0.000 | 0.000 | 3.650 |
| Fgfr2     | -1.283 | 3.880  | -6.239 | 0.000 | 0.000 | 3.646 |
| Mrp63     | -1.010 | 9.578  | -6.238 | 0.000 | 0.000 | 3.645 |
| Senp5     | 1.626  | 6.979  | 6.237  | 0.000 | 0.000 | 3.643 |
| Cox8a     | -1.117 | 10.394 | -6.235 | 0.000 | 0.000 | 3.639 |

|          |        |       |        |       |       |       |
|----------|--------|-------|--------|-------|-------|-------|
| Tcfec    | 2.869  | 4.768 | 6.232  | 0.000 | 0.000 | 3.631 |
| Slc12a8  | -3.431 | 5.061 | -6.230 | 0.000 | 0.000 | 3.628 |
| Rhbdf2   | 1.172  | 6.110 | 6.230  | 0.000 | 0.000 | 3.627 |
| Plod2    | 2.248  | 4.973 | 6.228  | 0.000 | 0.000 | 3.624 |
| Limk1    | 2.535  | 5.529 | 6.228  | 0.000 | 0.000 | 3.622 |
| R3hcc1   | 1.565  | 5.581 | 6.223  | 0.000 | 0.000 | 3.614 |
| Epb4.112 | 2.477  | 8.723 | 6.223  | 0.000 | 0.000 | 3.612 |
| Cytsa    | 1.535  | 6.613 | 6.222  | 0.000 | 0.000 | 3.612 |
| Bsc12    | -1.334 | 6.779 | -6.221 | 0.000 | 0.000 | 3.609 |
| Pxn      | 1.354  | 7.769 | 6.219  | 0.000 | 0.000 | 3.605 |
| Zc3h12c  | 1.846  | 5.535 | 6.216  | 0.000 | 0.000 | 3.597 |
| Dlcl     | 2.169  | 4.870 | 6.214  | 0.000 | 0.000 | 3.594 |
| Myole    | 2.026  | 4.847 | 6.213  | 0.000 | 0.000 | 3.593 |
| Ras111b  | 2.791  | 5.822 | 6.212  | 0.000 | 0.000 | 3.591 |
| Fkbp1b   | 1.684  | 4.238 | 6.211  | 0.000 | 0.000 | 3.589 |
| P2ry6    | 2.253  | 5.809 | 6.210  | 0.000 | 0.000 | 3.586 |
| Aldh1a1  | -2.835 | 8.844 | -6.209 | 0.000 | 0.000 | 3.584 |
| Eps8     | 1.329  | 9.275 | 6.207  | 0.000 | 0.000 | 3.580 |
| Idh3g    | -1.039 | 9.570 | -6.202 | 0.000 | 0.000 | 3.570 |
| Pkig     | 2.134  | 6.571 | 6.202  | 0.000 | 0.000 | 3.569 |
| Rnf19b   | 2.124  | 5.647 | 6.202  | 0.000 | 0.000 | 3.569 |
| Samsn1   | 2.046  | 3.846 | 6.200  | 0.000 | 0.000 | 3.566 |
| Pla2g16  | -2.163 | 8.305 | -6.197 | 0.000 | 0.000 | 3.559 |
| Csf2     | 2.798  | 4.957 | 6.195  | 0.000 | 0.000 | 3.555 |
| Mrpl12   | -1.117 | 9.227 | -6.194 | 0.000 | 0.000 | 3.552 |
| Cry2     | 1.434  | 4.796 | 6.192  | 0.000 | 0.000 | 3.549 |
| E1td1    | 1.592  | 4.407 | 6.192  | 0.000 | 0.000 | 3.548 |
| Chgb     | -6.045 | 6.422 | -6.190 | 0.000 | 0.000 | 3.544 |
| Rbpj     | 1.439  | 5.251 | 6.189  | 0.000 | 0.000 | 3.541 |
| Hira     | -1.037 | 4.027 | -6.188 | 0.000 | 0.000 | 3.540 |
| Rgs19    | 2.698  | 6.753 | 6.184  | 0.000 | 0.000 | 3.532 |
| Il17ra   | 1.617  | 4.608 | 6.184  | 0.000 | 0.000 | 3.531 |
| Axin1    | 1.603  | 6.701 | 6.183  | 0.000 | 0.000 | 3.529 |
| Rgs7     | -2.395 | 3.947 | -6.183 | 0.000 | 0.000 | 3.528 |
| Perl     | 2.021  | 6.900 | 6.180  | 0.000 | 0.000 | 3.522 |
| Sidt1    | -2.715 | 4.373 | -6.177 | 0.000 | 0.000 | 3.518 |
| Sh3bp4   | 1.585  | 5.743 | 6.177  | 0.000 | 0.000 | 3.517 |
| Apoa1    | -5.981 | 7.149 | -6.174 | 0.000 | 0.000 | 3.511 |
| Tnk2     | 1.430  | 8.608 | 6.174  | 0.000 | 0.000 | 3.510 |
| Rnf125   | 2.208  | 6.500 | 6.170  | 0.000 | 0.000 | 3.501 |
| Fbxl20   | 1.334  | 6.862 | 6.167  | 0.000 | 0.000 | 3.496 |
| Olr1     | 2.897  | 4.504 | 6.167  | 0.000 | 0.000 | 3.495 |
| Mtal     | 1.585  | 5.343 | 6.162  | 0.000 | 0.000 | 3.486 |
| Cdr2     | 1.834  | 5.533 | 6.162  | 0.000 | 0.000 | 3.485 |
| Csrnp2   | 1.247  | 5.146 | 6.159  | 0.000 | 0.000 | 3.479 |
| Adcy2    | -1.562 | 4.109 | -6.157 | 0.000 | 0.000 | 3.475 |
| Primal   | -1.317 | 3.791 | -6.154 | 0.000 | 0.000 | 3.469 |
| Zdhhc23  | -1.716 | 5.180 | -6.154 | 0.000 | 0.000 | 3.468 |
| AI413582 | 1.728  | 6.060 | 6.154  | 0.000 | 0.000 | 3.468 |
| Gpr176   | 1.682  | 4.320 | 6.153  | 0.000 | 0.000 | 3.466 |

|           |        |        |        |       |       |       |
|-----------|--------|--------|--------|-------|-------|-------|
| Fnbp4     | 1.258  | 6.986  | 6.149  | 0.000 | 0.000 | 3.458 |
| Figf      | 1.845  | 5.230  | 6.147  | 0.000 | 0.000 | 3.455 |
| 2900073C1 | -1.234 | 3.564  | -6.145 | 0.000 | 0.000 | 3.449 |
| Plk2      | 1.407  | 7.519  | 6.143  | 0.000 | 0.000 | 3.445 |
| Vcam1     | 2.537  | 5.837  | 6.141  | 0.000 | 0.000 | 3.442 |
| Pld4      | 2.180  | 5.399  | 6.141  | 0.000 | 0.000 | 3.441 |
| Pik3r2    | 1.814  | 5.732  | 6.140  | 0.000 | 0.000 | 3.439 |
| Wdr26     | 1.481  | 7.724  | 6.139  | 0.000 | 0.000 | 3.437 |
| Chpf2     | 1.507  | 6.453  | 6.139  | 0.000 | 0.000 | 3.436 |
| Stk3      | 1.534  | 7.057  | 6.138  | 0.000 | 0.000 | 3.435 |
| Sipa111   | 1.883  | 5.656  | 6.138  | 0.000 | 0.000 | 3.435 |
| Onecut2   | 4.020  | 5.682  | 6.137  | 0.000 | 0.000 | 3.433 |
| Tanc1     | 1.835  | 7.159  | 6.135  | 0.000 | 0.000 | 3.430 |
| Vsig2     | -4.696 | 7.468  | -6.133 | 0.000 | 0.000 | 3.424 |
| Cycl      | -1.302 | 9.951  | -6.126 | 0.000 | 0.000 | 3.410 |
| Tcfcp2    | 1.209  | 5.369  | 6.123  | 0.000 | 0.000 | 3.404 |
| Dph5      | 1.695  | 4.392  | 6.122  | 0.000 | 0.000 | 3.401 |
| Hadhb     | -1.191 | 9.787  | -6.121 | 0.000 | 0.000 | 3.399 |
| Crbn      | 1.785  | 7.044  | 6.120  | 0.000 | 0.000 | 3.398 |
| Gm7669    | 2.584  | 8.218  | 6.118  | 0.000 | 0.000 | 3.394 |
| Ccnd3     | 1.205  | 6.865  | 6.118  | 0.000 | 0.000 | 3.394 |
| Lrrc8e    | -1.947 | 4.548  | -6.118 | 0.000 | 0.000 | 3.394 |
| Purg      | 1.670  | 4.994  | 6.118  | 0.000 | 0.000 | 3.392 |
| Hivep1    | 2.011  | 5.963  | 6.115  | 0.000 | 0.000 | 3.386 |
| Cd3001f   | 2.543  | 6.309  | 6.113  | 0.000 | 0.000 | 3.383 |
| Iyd       | -3.981 | 5.123  | -6.112 | 0.000 | 0.000 | 3.380 |
| 2900073G1 | 1.271  | 11.283 | 6.111  | 0.000 | 0.000 | 3.379 |
| Ddi2      | 1.289  | 6.302  | 6.111  | 0.000 | 0.000 | 3.378 |
| Gstm6     | -1.920 | 4.020  | -6.107 | 0.000 | 0.000 | 3.371 |
| Isl1      | -2.281 | 4.239  | -6.107 | 0.000 | 0.000 | 3.370 |
| Rnf208    | -1.590 | 4.394  | -6.099 | 0.000 | 0.000 | 3.354 |
| Neurod1   | -2.188 | 3.784  | -6.098 | 0.000 | 0.000 | 3.350 |
| Nptx1     | 1.499  | 4.702  | 6.097  | 0.000 | 0.000 | 3.350 |
| Zfyve1    | 1.180  | 3.722  | 6.096  | 0.000 | 0.000 | 3.346 |
| Gfpt2     | 2.294  | 4.321  | 6.095  | 0.000 | 0.000 | 3.346 |
| Sat1      | 1.788  | 10.094 | 6.095  | 0.000 | 0.000 | 3.345 |
| Rnf19a    | 2.555  | 7.426  | 6.092  | 0.000 | 0.000 | 3.339 |
| Ddx46     | 1.391  | 6.524  | 6.090  | 0.000 | 0.000 | 3.334 |
| Vwf       | 2.880  | 5.904  | 6.083  | 0.000 | 0.000 | 3.320 |
| Dusp7     | 1.432  | 6.409  | 6.082  | 0.000 | 0.000 | 3.317 |
| Gpx4      | 1.112  | 10.790 | 6.082  | 0.000 | 0.000 | 3.316 |
| 1500011H2 | 2.432  | 6.541  | 6.081  | 0.000 | 0.000 | 3.315 |
| Cgref1    | -2.604 | 6.386  | -6.075 | 0.000 | 0.000 | 3.302 |
| Nceh1     | -1.203 | 4.339  | -6.075 | 0.000 | 0.000 | 3.302 |
| Slc15a3   | 2.307  | 5.045  | 6.074  | 0.000 | 0.000 | 3.301 |
| Sprr2k    | -2.066 | 4.489  | -6.073 | 0.000 | 0.000 | 3.298 |
| Abcg1     | 1.815  | 6.588  | 6.070  | 0.000 | 0.000 | 3.293 |
| Jak2      | 1.510  | 7.044  | 6.070  | 0.000 | 0.000 | 3.292 |
| Tspyl2    | 1.099  | 5.053  | 6.068  | 0.000 | 0.000 | 3.288 |
| A930026B  | 1.235  | 3.932  | 6.067  | 0.000 | 0.000 | 3.286 |

|           |        |        |        |       |       |       |
|-----------|--------|--------|--------|-------|-------|-------|
| 1810046K  | -1.284 | 3.381  | -6.063 | 0.000 | 0.000 | 3.277 |
| Als2cr4   | 2.049  | 6.525  | 6.061  | 0.000 | 0.000 | 3.274 |
| Clptm1    | -1.015 | 8.020  | -6.061 | 0.000 | 0.000 | 3.272 |
| D8Ert738  | -1.296 | 5.762  | -6.058 | 0.000 | 0.000 | 3.267 |
| Ifi202b   | 3.491  | 6.361  | 6.057  | 0.000 | 0.000 | 3.265 |
| C3        | 3.919  | 8.041  | 6.057  | 0.000 | 0.000 | 3.264 |
| Gm13305   | -1.810 | 7.304  | -6.055 | 0.000 | 0.000 | 3.261 |
| Steap2    | 3.064  | 7.571  | 6.049  | 0.000 | 0.000 | 3.247 |
| Sult1b1   | -4.361 | 5.466  | -6.048 | 0.000 | 0.000 | 3.246 |
| Dlg5      | 2.199  | 6.730  | 6.048  | 0.000 | 0.000 | 3.245 |
| Sh2d5     | 2.583  | 4.770  | 6.047  | 0.000 | 0.000 | 3.242 |
| Igsf8     | 1.076  | 6.777  | 6.046  | 0.000 | 0.000 | 3.242 |
| Aldh3b2   | -1.327 | 2.993  | -6.042 | 0.000 | 0.000 | 3.233 |
| Clqtnf4   | -1.599 | 4.146  | -6.040 | 0.000 | 0.000 | 3.229 |
| Agap3     | 1.508  | 6.748  | 6.040  | 0.000 | 0.000 | 3.229 |
| Cthrc1    | 3.305  | 6.013  | 6.039  | 0.000 | 0.000 | 3.227 |
| Ap4e1     | 1.461  | 6.052  | 6.038  | 0.000 | 0.000 | 3.224 |
| Mapk7     | 1.138  | 4.773  | 6.038  | 0.000 | 0.000 | 3.224 |
| Rnf41     | 1.338  | 5.349  | 6.035  | 0.000 | 0.000 | 3.219 |
| Slc11a1   | 1.785  | 4.893  | 6.030  | 0.000 | 0.000 | 3.207 |
| Nab2      | 1.486  | 4.922  | 6.029  | 0.000 | 0.000 | 3.206 |
| Dlgap3    | -1.037 | 4.208  | -6.028 | 0.000 | 0.000 | 3.202 |
| Ppplr3e   | 1.341  | 5.888  | 6.028  | 0.000 | 0.000 | 3.202 |
| Samd14    | 1.376  | 4.509  | 6.027  | 0.000 | 0.000 | 3.201 |
| Jak3      | 1.326  | 4.317  | 6.026  | 0.000 | 0.000 | 3.199 |
| Gdap10    | 1.903  | 6.243  | 6.025  | 0.000 | 0.000 | 3.198 |
| Dapk2     | -1.894 | 4.118  | -6.025 | 0.000 | 0.000 | 3.197 |
| Ctbs      | 1.803  | 4.712  | 6.024  | 0.000 | 0.000 | 3.195 |
| Lxn       | 2.217  | 9.130  | 6.024  | 0.000 | 0.000 | 3.195 |
| Nudt6     | 1.256  | 5.134  | 6.023  | 0.000 | 0.000 | 3.192 |
| Camk1     | 2.019  | 5.843  | 6.022  | 0.000 | 0.000 | 3.191 |
| B930036G  | -2.009 | 5.808  | -6.020 | 0.000 | 0.000 | 3.186 |
| 6330417A1 | 1.610  | 5.504  | 6.018  | 0.000 | 0.000 | 3.182 |
| Samhd1    | 2.007  | 6.344  | 6.017  | 0.000 | 0.000 | 3.179 |
| Syne2     | 2.369  | 6.800  | 6.015  | 0.000 | 0.000 | 3.175 |
| Fabp5     | -1.752 | 10.607 | -6.015 | 0.000 | 0.000 | 3.175 |
| Ear1      | 3.848  | 5.164  | 6.012  | 0.000 | 0.000 | 3.169 |
| F2        | -1.437 | 3.391  | -6.011 | 0.000 | 0.000 | 3.167 |
| BC059841  | -1.251 | 3.532  | -6.010 | 0.000 | 0.000 | 3.166 |
| 18100320C | 1.219  | 4.732  | 6.004  | 0.000 | 0.000 | 3.153 |
| Leprel2   | 1.395  | 4.411  | 6.004  | 0.000 | 0.000 | 3.152 |
| Fam60a    | 2.659  | 8.488  | 6.000  | 0.000 | 0.000 | 3.144 |
| 2310016CC | 3.058  | 7.749  | 5.993  | 0.000 | 0.000 | 3.130 |
| Cyp2c44   | -4.481 | 5.308  | -5.992 | 0.000 | 0.000 | 3.127 |
| Cyp2c65   | -5.024 | 5.619  | -5.987 | 0.000 | 0.000 | 3.116 |
| Col5a3    | 2.192  | 5.024  | 5.983  | 0.000 | 0.000 | 3.109 |
| Vegfa     | 2.797  | 8.256  | 5.983  | 0.000 | 0.000 | 3.108 |
| Capn5     | 1.543  | 7.626  | 5.983  | 0.000 | 0.000 | 3.108 |
| Tubb2a-ps | 3.114  | 5.188  | 5.980  | 0.000 | 0.000 | 3.101 |
| 4-Sep     | 1.778  | 5.425  | 5.976  | 0.000 | 0.000 | 3.094 |

|           |        |        |        |       |       |       |
|-----------|--------|--------|--------|-------|-------|-------|
| Phc2      | 1.626  | 8.341  | 5.973  | 0.000 | 0.000 | 3.087 |
| Arpc1b    | 1.680  | 10.649 | 5.970  | 0.000 | 0.000 | 3.080 |
| Cln3      | 1.264  | 6.346  | 5.966  | 0.000 | 0.000 | 3.073 |
| Otub1     | 2.052  | 8.076  | 5.964  | 0.000 | 0.000 | 3.068 |
| Zfp697    | 3.147  | 5.520  | 5.962  | 0.000 | 0.000 | 3.064 |
| Bex4      | -3.272 | 5.455  | -5.961 | 0.000 | 0.000 | 3.061 |
| Gigyf2    | -1.608 | 4.506  | -5.960 | 0.000 | 0.000 | 3.059 |
| Ddb1      | 1.428  | 9.757  | 5.959  | 0.000 | 0.000 | 3.056 |
| Gem       | 1.836  | 4.184  | 5.955  | 0.000 | 0.000 | 3.049 |
| 9530008L1 | -1.823 | 3.422  | -5.955 | 0.000 | 0.000 | 3.049 |
| Actr2     | 1.695  | 5.399  | 5.954  | 0.000 | 0.000 | 3.046 |
| Gstm1     | -2.033 | 9.568  | -5.954 | 0.000 | 0.000 | 3.046 |
| Pcbp4     | 1.358  | 6.239  | 5.951  | 0.000 | 0.000 | 3.041 |
| Cldn5     | 2.189  | 5.076  | 5.946  | 0.000 | 0.000 | 3.030 |
| 4930518I1 | 1.419  | 4.636  | 5.944  | 0.000 | 0.000 | 3.025 |
| Rilpl2    | 2.299  | 7.567  | 5.944  | 0.000 | 0.000 | 3.024 |
| Ttll1     | 1.134  | 4.871  | 5.942  | 0.000 | 0.000 | 3.020 |
| Fancf     | 1.404  | 5.848  | 5.942  | 0.000 | 0.000 | 3.020 |
| Bnc2      | 2.631  | 5.026  | 5.940  | 0.000 | 0.000 | 3.017 |
| Sykb      | 1.645  | 5.848  | 5.939  | 0.000 | 0.000 | 3.016 |
| Lrrc33    | 1.815  | 4.719  | 5.937  | 0.000 | 0.000 | 3.011 |
| LOC100045 | -1.109 | 3.286  | -5.937 | 0.000 | 0.000 | 3.010 |
| Sun2      | 1.255  | 7.470  | 5.936  | 0.000 | 0.000 | 3.007 |
| Gm4162    | -5.628 | 6.773  | -5.934 | 0.000 | 0.000 | 3.005 |
| Morc2a    | 1.599  | 7.213  | 5.933  | 0.000 | 0.000 | 3.002 |
| BC088983  | 1.638  | 6.269  | 5.925  | 0.000 | 0.000 | 2.986 |
| Ddx27     | 1.848  | 6.445  | 5.923  | 0.000 | 0.000 | 2.980 |
| Acad8     | -1.887 | 4.841  | -5.919 | 0.000 | 0.000 | 2.972 |
| Pkm2      | 1.672  | 10.133 | 5.918  | 0.000 | 0.000 | 2.971 |
| Fam117b   | 2.044  | 7.363  | 5.917  | 0.000 | 0.000 | 2.967 |
| Ampd2     | 1.136  | 6.403  | 5.916  | 0.000 | 0.000 | 2.966 |
| Cdh17     | 5.231  | 6.435  | 5.915  | 0.000 | 0.000 | 2.963 |
| Fam20c    | 1.342  | 6.813  | 5.914  | 0.000 | 0.000 | 2.962 |
| Btbd11    | 2.483  | 4.538  | 5.914  | 0.000 | 0.000 | 2.962 |
| Phtf2     | 1.491  | 5.333  | 5.913  | 0.000 | 0.000 | 2.959 |
| Ramp2     | 1.563  | 5.326  | 5.912  | 0.000 | 0.000 | 2.958 |
| Nudt12    | -1.440 | 5.812  | -5.912 | 0.000 | 0.000 | 2.958 |
| Deb1      | -1.481 | 8.265  | -5.912 | 0.000 | 0.000 | 2.956 |
| Nrp1      | 2.687  | 6.324  | 5.911  | 0.000 | 0.000 | 2.955 |
| Cabc1     | -2.347 | 5.571  | -5.909 | 0.000 | 0.000 | 2.950 |
| Ddx52     | 1.580  | 6.886  | 5.905  | 0.000 | 0.000 | 2.944 |
| LOC633966 | 1.122  | 4.137  | 5.904  | 0.000 | 0.000 | 2.941 |
| Arhgap30  | 2.026  | 5.796  | 5.899  | 0.000 | 0.000 | 2.931 |
| 11-Sep    | 2.120  | 6.798  | 5.899  | 0.000 | 0.000 | 2.930 |
| Trp53inp1 | 2.136  | 7.612  | 5.899  | 0.000 | 0.000 | 2.929 |
| 2610528J1 | -2.362 | 5.870  | -5.898 | 0.000 | 0.000 | 2.928 |
| BC023814  | 1.430  | 5.772  | 5.898  | 0.000 | 0.000 | 2.927 |
| Lmo2      | 1.576  | 5.342  | 5.897  | 0.000 | 0.000 | 2.926 |
| Tpm2      | 3.057  | 8.090  | 5.897  | 0.000 | 0.000 | 2.925 |
| Zfp362    | 1.759  | 5.840  | 5.893  | 0.000 | 0.000 | 2.916 |



|           |        |       |        |       |       |       |
|-----------|--------|-------|--------|-------|-------|-------|
| 2210409E1 | -1.663 | 3.416 | -5.892 | 0.000 | 0.000 | 2.916 |
| Rapgef2   | 2.345  | 7.928 | 5.891  | 0.000 | 0.000 | 2.914 |
| Myst4     | 1.948  | 6.794 | 5.887  | 0.000 | 0.000 | 2.905 |
| Pls3      | 2.490  | 8.793 | 5.887  | 0.000 | 0.000 | 2.904 |
| Morc3     | 1.944  | 7.913 | 5.883  | 0.000 | 0.000 | 2.895 |
| Dock10    | 2.745  | 4.987 | 5.882  | 0.000 | 0.000 | 2.893 |
| Angell1   | -1.111 | 5.293 | -5.881 | 0.000 | 0.000 | 2.891 |
| Itm2c     | 1.273  | 9.887 | 5.878  | 0.000 | 0.000 | 2.884 |
| Trim59    | 2.078  | 7.638 | 5.877  | 0.000 | 0.000 | 2.884 |
| Ccl17     | 3.057  | 5.435 | 5.876  | 0.000 | 0.000 | 2.881 |
| AI413194  | 1.300  | 6.602 | 5.875  | 0.000 | 0.000 | 2.878 |
| Fbxo7     | -1.292 | 6.647 | -5.873 | 0.000 | 0.000 | 2.874 |
| Casp12    | 3.012  | 5.473 | 5.872  | 0.000 | 0.000 | 2.872 |
| Cd274     | 1.843  | 4.931 | 5.872  | 0.000 | 0.000 | 2.871 |
| Thns12    | -1.749 | 5.564 | -5.870 | 0.000 | 0.000 | 2.869 |
| Ly6g6d    | -1.573 | 3.945 | -5.869 | 0.000 | 0.000 | 2.866 |
| Cln8      | 1.048  | 5.771 | 5.869  | 0.000 | 0.000 | 2.866 |
| Zfp217    | 1.863  | 7.466 | 5.866  | 0.000 | 0.000 | 2.860 |
| Ptprn     | 2.034  | 4.905 | 5.866  | 0.000 | 0.000 | 2.859 |
| Klf7      | 1.274  | 7.273 | 5.865  | 0.000 | 0.000 | 2.858 |
| Zfp36     | -2.335 | 8.242 | -5.864 | 0.000 | 0.000 | 2.855 |
| Ppmlk     | -1.190 | 5.250 | -5.864 | 0.000 | 0.000 | 2.855 |
| Npy       | 4.869  | 6.590 | 5.863  | 0.000 | 0.000 | 2.853 |
| Bach2     | 1.991  | 4.852 | 5.863  | 0.000 | 0.000 | 2.852 |
| Anub11    | 1.839  | 4.335 | 5.863  | 0.000 | 0.000 | 2.852 |
| Ier51     | 1.950  | 5.260 | 5.862  | 0.000 | 0.000 | 2.850 |
| Tnfaip81z | 1.832  | 4.970 | 5.861  | 0.000 | 0.000 | 2.849 |
| Plekhg1   | 1.289  | 4.646 | 5.861  | 0.000 | 0.000 | 2.848 |
| Ttc7b     | 1.290  | 4.343 | 5.861  | 0.000 | 0.000 | 2.848 |
| Gm13111   | -1.251 | 2.721 | -5.856 | 0.000 | 0.000 | 2.839 |
| Bach1     | 1.502  | 8.215 | 5.853  | 0.000 | 0.000 | 2.832 |
| Pat11     | 1.113  | 7.486 | 5.852  | 0.000 | 0.000 | 2.830 |
| Rheb11    | 1.249  | 4.911 | 5.851  | 0.000 | 0.000 | 2.827 |
| Mcl1      | 1.636  | 9.085 | 5.850  | 0.000 | 0.000 | 2.825 |
| Akr1b10   | 1.801  | 4.964 | 5.850  | 0.000 | 0.000 | 2.825 |
| Ankrd26   | 1.569  | 4.758 | 5.842  | 0.000 | 0.000 | 2.808 |
| P2ry14    | 2.585  | 4.346 | 5.838  | 0.000 | 0.000 | 2.800 |
| E230029CC | 1.026  | 3.660 | 5.837  | 0.000 | 0.000 | 2.797 |
| 1700056N1 | 1.209  | 4.758 | 5.834  | 0.000 | 0.000 | 2.791 |
| Zfp830    | 1.204  | 6.623 | 5.834  | 0.000 | 0.000 | 2.791 |
| Plbd2     | 1.411  | 4.958 | 5.832  | 0.000 | 0.000 | 2.788 |
| Rnf216    | 1.246  | 5.870 | 5.832  | 0.000 | 0.000 | 2.786 |
| B3gnt9    | 1.112  | 4.448 | 5.827  | 0.000 | 0.000 | 2.776 |
| Kcnj13    | -2.006 | 3.598 | -5.827 | 0.000 | 0.000 | 2.775 |
| Tinagl1   | 1.673  | 7.491 | 5.827  | 0.000 | 0.000 | 2.775 |
| Smpd13b   | -1.837 | 5.302 | -5.826 | 0.000 | 0.000 | 2.773 |
| Yeats2    | 1.008  | 6.185 | 5.817  | 0.000 | 0.000 | 2.755 |
| Habp2     | -2.164 | 3.873 | -5.815 | 0.000 | 0.000 | 2.751 |
| Mpp6      | 2.286  | 4.955 | 5.815  | 0.000 | 0.000 | 2.750 |
| Krt15     | -2.335 | 3.840 | -5.809 | 0.000 | 0.000 | 2.738 |

|           |        |        |        |       |       |       |
|-----------|--------|--------|--------|-------|-------|-------|
| Scg3      | -2.200 | 4.081  | -5.808 | 0.000 | 0.000 | 2.736 |
| Myh9      | 1.205  | 9.520  | 5.807  | 0.000 | 0.000 | 2.734 |
| Nin1      | 1.536  | 3.965  | 5.807  | 0.000 | 0.000 | 2.734 |
| Rassf10   | -1.816 | 4.147  | -5.806 | 0.000 | 0.000 | 2.732 |
| 2610524H  | 1.923  | 6.903  | 5.804  | 0.000 | 0.000 | 2.727 |
| Unc119    | 1.367  | 6.432  | 5.801  | 0.000 | 0.000 | 2.720 |
| Corola    | 2.992  | 6.569  | 5.799  | 0.000 | 0.000 | 2.716 |
| Cdk17     | 1.939  | 7.978  | 5.797  | 0.000 | 0.000 | 2.712 |
| Pfn2      | 2.511  | 6.662  | 5.797  | 0.000 | 0.000 | 2.712 |
| Ctnnb11   | 1.631  | 7.789  | 5.797  | 0.000 | 0.000 | 2.711 |
| Was       | 1.607  | 4.282  | 5.796  | 0.000 | 0.000 | 2.709 |
| C73004901 | 1.879  | 6.816  | 5.793  | 0.000 | 0.000 | 2.703 |
| LOC100046 | 2.940  | 5.017  | 5.791  | 0.000 | 0.000 | 2.700 |
| Zfp637    | 1.021  | 7.175  | 5.791  | 0.000 | 0.000 | 2.699 |
| Rtf1      | 1.632  | 7.254  | 5.790  | 0.000 | 0.000 | 2.698 |
| 4921513D2 | 1.359  | 5.846  | 5.782  | 0.000 | 0.000 | 2.679 |
| Snx11     | 1.125  | 4.733  | 5.781  | 0.000 | 0.000 | 2.677 |
| 1700058M1 | -1.116 | 2.605  | -5.778 | 0.000 | 0.000 | 2.671 |
| Msr1      | 2.475  | 5.580  | 5.777  | 0.000 | 0.000 | 2.668 |
| Atp2a3    | -3.269 | 7.701  | -5.776 | 0.000 | 0.000 | 2.667 |
| Dbi       | -1.568 | 10.453 | -5.776 | 0.000 | 0.000 | 2.666 |
| Ptpn22    | 2.248  | 4.807  | 5.773  | 0.000 | 0.000 | 2.661 |
| Itln1     | -3.143 | 4.139  | -5.773 | 0.000 | 0.000 | 2.660 |
| Cyr61     | 2.093  | 8.119  | 5.762  | 0.000 | 0.000 | 2.637 |
| Inpp5k    | 1.005  | 6.881  | 5.761  | 0.000 | 0.000 | 2.635 |
| Fam82a2   | -1.221 | 7.597  | -5.760 | 0.000 | 0.000 | 2.633 |
| Fam55c    | 1.898  | 4.646  | 5.759  | 0.000 | 0.000 | 2.630 |
| Nup210    | -1.292 | 5.638  | -5.758 | 0.000 | 0.000 | 2.628 |
| Rimbp2    | -1.035 | 3.762  | -5.757 | 0.000 | 0.000 | 2.627 |
| Fbxw4     | 1.136  | 6.605  | 5.757  | 0.000 | 0.000 | 2.627 |
| Ctps      | 1.920  | 7.120  | 5.756  | 0.000 | 0.000 | 2.625 |
| AI987944  | 1.111  | 6.030  | 5.756  | 0.000 | 0.000 | 2.624 |
| Ikbkb     | 1.208  | 8.219  | 5.756  | 0.000 | 0.000 | 2.624 |
| Fbxo31    | 1.272  | 5.805  | 5.755  | 0.000 | 0.000 | 2.622 |
| Stx4a     | 1.209  | 8.304  | 5.754  | 0.000 | 0.000 | 2.620 |
| A730059M1 | 1.159  | 4.742  | 5.750  | 0.000 | 0.000 | 2.612 |
| BC050254  | 1.252  | 6.475  | 5.748  | 0.000 | 0.000 | 2.607 |
| Plod3     | 1.778  | 7.095  | 5.748  | 0.000 | 0.000 | 2.606 |
| Irf8      | 1.927  | 5.796  | 5.747  | 0.000 | 0.000 | 2.605 |
| Fbxw17    | 1.339  | 5.974  | 5.744  | 0.000 | 0.000 | 2.598 |
| 4930402H2 | 1.144  | 4.633  | 5.742  | 0.000 | 0.000 | 2.594 |
| Srd5a1    | 3.408  | 6.176  | 5.742  | 0.000 | 0.000 | 2.593 |
| I134      | 2.092  | 3.963  | 5.741  | 0.000 | 0.000 | 2.593 |
| Fam129a   | 2.203  | 6.269  | 5.737  | 0.000 | 0.000 | 2.583 |
| Itpr1     | 1.692  | 5.080  | 5.736  | 0.000 | 0.000 | 2.582 |
| Ap3m2     | 1.934  | 5.563  | 5.735  | 0.000 | 0.000 | 2.580 |
| Cav2      | 2.747  | 10.092 | 5.734  | 0.000 | 0.000 | 2.577 |
| 1700071K  | -1.047 | 2.965  | -5.728 | 0.000 | 0.000 | 2.563 |
| Rbm9      | 1.258  | 5.547  | 5.724  | 0.000 | 0.000 | 2.555 |
| LOC100047 | -3.779 | 6.940  | -5.721 | 0.000 | 0.000 | 2.549 |

|           |        |        |        |       |       |       |
|-----------|--------|--------|--------|-------|-------|-------|
| Gng2      | 1.055  | 4.079  | 5.721  | 0.000 | 0.000 | 2.548 |
| Vezt      | 1.118  | 5.617  | 5.720  | 0.000 | 0.000 | 2.547 |
| Zfp346    | 1.218  | 5.724  | 5.718  | 0.000 | 0.000 | 2.543 |
| Cryab     | 3.065  | 4.927  | 5.717  | 0.000 | 0.000 | 2.542 |
| Mup1      | -5.476 | 5.433  | -5.716 | 0.000 | 0.000 | 2.538 |
| Elmod3    | -1.429 | 6.072  | -5.714 | 0.000 | 0.000 | 2.535 |
| Med131    | 1.690  | 7.477  | 5.714  | 0.000 | 0.000 | 2.533 |
| Gm10083   | -1.066 | 3.338  | -5.712 | 0.000 | 0.000 | 2.530 |
| Wbp7      | 1.281  | 7.002  | 5.711  | 0.000 | 0.000 | 2.528 |
| 6030451C  | 1.362  | 4.160  | 5.710  | 0.000 | 0.000 | 2.525 |
| Hmgn1     | 1.479  | 11.020 | 5.710  | 0.000 | 0.000 | 2.525 |
| Mical11   | 1.983  | 6.874  | 5.704  | 0.000 | 0.000 | 2.513 |
| 9330161A  | 1.958  | 6.433  | 5.704  | 0.000 | 0.000 | 2.512 |
| Mcpt8     | 3.073  | 5.102  | 5.703  | 0.000 | 0.000 | 2.510 |
| Espn      | -1.362 | 3.062  | -5.702 | 0.000 | 0.000 | 2.509 |
| Vps8      | 1.352  | 4.423  | 5.700  | 0.000 | 0.000 | 2.504 |
| 90306170C | -1.402 | 6.551  | -5.700 | 0.000 | 0.000 | 2.504 |
| Pdlim7    | 1.278  | 6.293  | 5.698  | 0.000 | 0.000 | 2.499 |
| 130004C05 | 1.380  | 3.854  | 5.697  | 0.000 | 0.000 | 2.498 |
| Zfp664    | 1.620  | 8.294  | 5.696  | 0.000 | 0.000 | 2.495 |
| Adrbk2    | -1.366 | 5.563  | -5.691 | 0.000 | 0.000 | 2.484 |
| Stra13    | -1.289 | 7.264  | -5.689 | 0.000 | 0.000 | 2.481 |
| Dbn1      | 2.907  | 7.236  | 5.689  | 0.000 | 0.000 | 2.479 |
| 2210023G  | -3.646 | 6.709  | -5.688 | 0.000 | 0.000 | 2.479 |
| Egr1      | -1.482 | 9.956  | -5.688 | 0.000 | 0.000 | 2.478 |
| Mmp23     | 2.684  | 5.870  | 5.687  | 0.000 | 0.000 | 2.475 |
| Cd3001d   | 1.371  | 4.101  | 5.686  | 0.000 | 0.000 | 2.473 |
| Sec61a2   | 1.196  | 4.947  | 5.684  | 0.000 | 0.000 | 2.469 |
| Adssl1    | 2.570  | 6.580  | 5.683  | 0.000 | 0.000 | 2.468 |
| Slc9a1    | -1.342 | 7.689  | -5.682 | 0.000 | 0.000 | 2.466 |
| Gm2590    | 1.594  | 5.670  | 5.680  | 0.000 | 0.000 | 2.461 |
| Sestd1    | 1.521  | 7.237  | 5.680  | 0.000 | 0.000 | 2.460 |
| Kcnn4     | 2.201  | 8.069  | 5.674  | 0.000 | 0.000 | 2.449 |
| Engase    | -1.107 | 3.895  | -5.673 | 0.000 | 0.000 | 2.445 |
| Spats2    | 1.694  | 7.021  | 5.672  | 0.000 | 0.000 | 2.444 |
| Nfkb2     | 1.087  | 5.801  | 5.668  | 0.000 | 0.000 | 2.436 |
| Ankle2    | 1.456  | 5.809  | 5.666  | 0.000 | 0.000 | 2.430 |
| Diol      | -2.127 | 3.485  | -5.665 | 0.000 | 0.000 | 2.429 |
| Nphs1     | -1.065 | 3.419  | -5.665 | 0.000 | 0.000 | 2.428 |
| Etv4      | 1.515  | 6.141  | 5.664  | 0.000 | 0.000 | 2.427 |
| Rab13     | 1.064  | 6.557  | 5.663  | 0.000 | 0.000 | 2.424 |
| Vsig8     | -1.044 | 2.975  | -5.661 | 0.000 | 0.000 | 2.421 |
| Crlf3     | 2.136  | 6.466  | 5.661  | 0.000 | 0.000 | 2.420 |
| Sh3glb1   | 1.379  | 10.638 | 5.660  | 0.000 | 0.000 | 2.417 |
| Gm672     | 1.257  | 4.987  | 5.659  | 0.000 | 0.000 | 2.415 |
| C130015C1 | 1.343  | 4.813  | 5.651  | 0.000 | 0.000 | 2.399 |
| Klc3      | 1.634  | 5.849  | 5.651  | 0.000 | 0.000 | 2.398 |
| Vps72     | 1.722  | 7.320  | 5.646  | 0.000 | 0.000 | 2.387 |
| Gpr39     | 1.835  | 5.062  | 5.645  | 0.000 | 0.000 | 2.385 |
| Prkd2     | 1.038  | 4.102  | 5.638  | 0.000 | 0.000 | 2.371 |

|           |        |        |        |       |       |       |
|-----------|--------|--------|--------|-------|-------|-------|
| Fam171a1  | 1.434  | 5.642  | 5.636  | 0.000 | 0.000 | 2.367 |
| AA415038  | 1.512  | 5.340  | 5.635  | 0.000 | 0.000 | 2.363 |
| Sfrs12    | 1.318  | 7.450  | 5.635  | 0.000 | 0.000 | 2.363 |
| Krtdap    | -4.542 | 4.439  | -5.633 | 0.000 | 0.000 | 2.359 |
| Prdm1     | 2.056  | 4.309  | 5.632  | 0.000 | 0.000 | 2.357 |
| Itpripl2  | 1.620  | 9.196  | 5.629  | 0.000 | 0.000 | 2.352 |
| Mtss1     | 1.406  | 6.837  | 5.629  | 0.000 | 0.000 | 2.351 |
| Mthfd11   | 1.960  | 6.357  | 5.627  | 0.000 | 0.000 | 2.348 |
| Nrtn      | -1.565 | 5.375  | -5.627 | 0.000 | 0.000 | 2.346 |
| Sh3rf2    | -1.849 | 3.945  | -5.624 | 0.000 | 0.000 | 2.341 |
| Tmem37    | 1.790  | 5.919  | 5.623  | 0.000 | 0.000 | 2.339 |
| 5033418A1 | 1.647  | 4.976  | 5.622  | 0.000 | 0.000 | 2.336 |
| Xylb      | -1.839 | 4.763  | -5.619 | 0.000 | 0.000 | 2.330 |
| Arid5a    | 1.762  | 4.689  | 5.617  | 0.000 | 0.000 | 2.326 |
| Cox6a1    | -1.101 | 11.181 | -5.617 | 0.000 | 0.000 | 2.325 |
| Bcl9      | 1.087  | 5.200  | 5.611  | 0.000 | 0.000 | 2.312 |
| Trpm5     | -2.124 | 4.026  | -5.609 | 0.000 | 0.000 | 2.307 |
| Abcc12    | -1.130 | 3.113  | -5.607 | 0.000 | 0.000 | 2.304 |
| Tbcd12    | 1.578  | 6.577  | 5.606  | 0.000 | 0.000 | 2.302 |
| Tex2      | -1.158 | 5.240  | -5.606 | 0.000 | 0.000 | 2.301 |
| Acer1     | -3.120 | 3.596  | -5.604 | 0.000 | 0.000 | 2.298 |
| AI987986  | -1.181 | 3.841  | -5.603 | 0.000 | 0.000 | 2.294 |
| Prom2     | -1.353 | 3.289  | -5.600 | 0.000 | 0.000 | 2.289 |
| LOC100044 | 2.069  | 7.977  | 5.599  | 0.000 | 0.000 | 2.286 |
| Grhl2     | -2.369 | 7.324  | -5.597 | 0.000 | 0.000 | 2.283 |
| B930098AC | 1.681  | 4.251  | 5.597  | 0.000 | 0.000 | 2.281 |
| Tcerg1    | 1.990  | 6.696  | 5.594  | 0.000 | 0.000 | 2.276 |
| Tmem204   | 1.445  | 4.653  | 5.593  | 0.000 | 0.000 | 2.272 |
| LOC676546 | 2.109  | 4.530  | 5.592  | 0.000 | 0.000 | 2.271 |
| 1810033B1 | 2.239  | 5.334  | 5.592  | 0.000 | 0.000 | 2.270 |
| Psat1     | 2.580  | 6.390  | 5.590  | 0.000 | 0.000 | 2.266 |
| Git1      | 1.129  | 5.421  | 5.589  | 0.000 | 0.000 | 2.265 |
| Gm22      | 1.846  | 4.785  | 5.589  | 0.000 | 0.000 | 2.265 |
| Acot7     | 1.400  | 7.995  | 5.582  | 0.000 | 0.000 | 2.250 |
| Mysm1     | 1.686  | 6.056  | 5.580  | 0.000 | 0.000 | 2.245 |
| Pgpep1    | 1.010  | 5.602  | 5.578  | 0.000 | 0.000 | 2.241 |
| Luzpl1    | 1.504  | 6.302  | 5.576  | 0.000 | 0.000 | 2.236 |
| Prr18     | -1.229 | 3.431  | -5.575 | 0.000 | 0.000 | 2.233 |
| Ikbke     | 1.314  | 6.672  | 5.573  | 0.000 | 0.000 | 2.230 |
| 2310042E2 | -5.522 | 5.734  | -5.573 | 0.000 | 0.000 | 2.230 |
| Uxs1      | 1.873  | 6.429  | 5.573  | 0.000 | 0.000 | 2.229 |
| 2310009AC | -2.047 | 7.938  | -5.570 | 0.000 | 0.000 | 2.224 |
| Tmem51    | -2.320 | 8.252  | -5.570 | 0.000 | 0.000 | 2.224 |
| Fabp12    | -2.980 | 3.758  | -5.569 | 0.000 | 0.000 | 2.221 |
| Amdhd2    | 1.344  | 6.630  | 5.568  | 0.000 | 0.000 | 2.220 |
| Iqcb1     | 1.586  | 5.181  | 5.567  | 0.000 | 0.000 | 2.217 |
| Fahd1     | -1.495 | 5.632  | -5.564 | 0.000 | 0.000 | 2.210 |
| Cks1b     | 2.199  | 10.021 | 5.563  | 0.000 | 0.000 | 2.209 |
| Ms4a7     | 2.443  | 4.473  | 5.562  | 0.000 | 0.000 | 2.207 |
| Ppfibp1   | 1.153  | 5.070  | 5.562  | 0.000 | 0.000 | 2.206 |

|           |        |        |        |       |       |       |
|-----------|--------|--------|--------|-------|-------|-------|
| Fytttd1   | 2.408  | 7.982  | 5.559  | 0.000 | 0.000 | 2.200 |
| Cpe       | 2.768  | 9.569  | 5.556  | 0.000 | 0.000 | 2.193 |
| Fbxo38    | 1.090  | 7.240  | 5.556  | 0.000 | 0.000 | 2.193 |
| Dci       | -1.840 | 8.658  | -5.550 | 0.000 | 0.000 | 2.179 |
| Hpgd      | -4.497 | 7.199  | -5.549 | 0.000 | 0.000 | 2.179 |
| Gtf2h2    | 1.478  | 5.732  | 5.548  | 0.000 | 0.000 | 2.177 |
| Car15     | -1.182 | 3.684  | -5.546 | 0.000 | 0.000 | 2.172 |
| Gzmd      | 3.380  | 4.836  | 5.543  | 0.000 | 0.000 | 2.165 |
| Ctdsp2    | 1.186  | 9.338  | 5.542  | 0.000 | 0.000 | 2.163 |
| Slc25a37  | 2.233  | 6.536  | 5.541  | 0.000 | 0.000 | 2.161 |
| Mesdcl    | -1.311 | 4.741  | -5.539 | 0.000 | 0.000 | 2.157 |
| Rbak      | 1.511  | 5.971  | 5.538  | 0.000 | 0.000 | 2.154 |
| Itpkb     | 1.361  | 5.686  | 5.538  | 0.000 | 0.000 | 2.154 |
| Hspb1     | 2.140  | 9.460  | 5.537  | 0.000 | 0.000 | 2.153 |
| Fem1a     | -1.109 | 4.672  | -5.536 | 0.000 | 0.000 | 2.149 |
| Fcna      | 3.090  | 6.508  | 5.534  | 0.000 | 0.000 | 2.146 |
| Ces6      | -2.149 | 4.322  | -5.534 | 0.000 | 0.000 | 2.146 |
| Fgd6      | 2.025  | 6.323  | 5.534  | 0.000 | 0.000 | 2.146 |
| Crtap     | 2.244  | 8.055  | 5.534  | 0.000 | 0.000 | 2.145 |
| Als2cl    | 1.024  | 4.190  | 5.533  | 0.000 | 0.000 | 2.144 |
| Stk10     | 1.547  | 6.284  | 5.533  | 0.000 | 0.000 | 2.144 |
| 2410085M1 | 1.478  | 5.575  | 5.533  | 0.000 | 0.000 | 2.143 |
| Ccdc52    | -1.368 | 5.862  | -5.532 | 0.000 | 0.000 | 2.142 |
| Myola     | -3.351 | 5.021  | -5.532 | 0.000 | 0.000 | 2.140 |
| Ciz1      | 1.279  | 6.179  | 5.531  | 0.000 | 0.000 | 2.140 |
| Lass2     | 1.523  | 8.972  | 5.531  | 0.000 | 0.000 | 2.138 |
| Gnmt      | -2.612 | 4.537  | -5.530 | 0.000 | 0.000 | 2.137 |
| Zfp71-rs1 | 1.325  | 6.001  | 5.528  | 0.000 | 0.000 | 2.132 |
| 1700019N1 | -1.211 | 2.947  | -5.527 | 0.000 | 0.000 | 2.131 |
| Plc12     | 1.543  | 5.196  | 5.523  | 0.000 | 0.000 | 2.122 |
| A130040M1 | 3.656  | 8.104  | 5.520  | 0.000 | 0.000 | 2.115 |
| Igf2bp2   | 1.369  | 7.996  | 5.519  | 0.000 | 0.000 | 2.114 |
| Scg5      | -3.705 | 4.860  | -5.518 | 0.000 | 0.000 | 2.110 |
| 5830462P1 | 1.024  | 5.048  | 5.514  | 0.000 | 0.000 | 2.101 |
| Stat5a    | -1.359 | 6.223  | -5.513 | 0.000 | 0.000 | 2.099 |
| 1110029L1 | 1.533  | 6.391  | 5.511  | 0.000 | 0.000 | 2.097 |
| Smad5     | 1.218  | 4.552  | 5.511  | 0.000 | 0.000 | 2.096 |
| E330020D1 | 1.797  | 4.409  | 5.510  | 0.000 | 0.000 | 2.094 |
| Fermt3    | 2.014  | 4.654  | 5.510  | 0.000 | 0.000 | 2.092 |
| Parp11    | 1.101  | 5.174  | 5.506  | 0.000 | 0.000 | 2.085 |
| 1200015M1 | 2.140  | 11.349 | 5.506  | 0.000 | 0.000 | 2.085 |
| Ndufa11   | -1.149 | 9.833  | -5.505 | 0.000 | 0.000 | 2.083 |
| Tnfaip3   | 1.302  | 7.611  | 5.505  | 0.000 | 0.000 | 2.083 |
| Gpt       | -2.275 | 6.955  | -5.503 | 0.000 | 0.000 | 2.078 |
| 2310009B1 | 1.596  | 6.461  | 5.501  | 0.000 | 0.000 | 2.074 |
| 2700078E1 | 1.239  | 5.379  | 5.500  | 0.000 | 0.000 | 2.072 |
| Rcc2      | 1.541  | 7.586  | 5.499  | 0.000 | 0.000 | 2.070 |
| Prkar1a   | 1.226  | 10.013 | 5.499  | 0.000 | 0.000 | 2.070 |
| Dlg1      | 1.353  | 9.371  | 5.499  | 0.000 | 0.000 | 2.069 |
| Csnk1g3   | 1.974  | 7.423  | 5.498  | 0.000 | 0.000 | 2.067 |

|           |        |        |        |       |       |       |
|-----------|--------|--------|--------|-------|-------|-------|
| Lats2     | 1.128  | 3.999  | 5.495  | 0.000 | 0.000 | 2.062 |
| Mad212    | 1.312  | 6.240  | 5.495  | 0.000 | 0.000 | 2.060 |
| Tspan17   | 1.512  | 6.067  | 5.494  | 0.000 | 0.000 | 2.059 |
| Atp5a1    | -1.620 | 6.771  | -5.493 | 0.000 | 0.000 | 2.057 |
| Fndc3b    | 1.437  | 10.188 | 5.492  | 0.000 | 0.000 | 2.054 |
| Srpx2     | 2.105  | 4.405  | 5.492  | 0.000 | 0.000 | 2.054 |
| Hemk1     | -1.096 | 5.432  | -5.490 | 0.000 | 0.000 | 2.049 |
| 2410089E  | 1.419  | 5.180  | 5.487  | 0.000 | 0.000 | 2.044 |
| Uba3      | 2.136  | 8.427  | 5.486  | 0.000 | 0.000 | 2.041 |
| Mbd6      | 1.255  | 5.950  | 5.485  | 0.000 | 0.000 | 2.038 |
| Tubb5     | 1.698  | 10.308 | 5.481  | 0.000 | 0.000 | 2.031 |
| Tmem205   | -1.284 | 8.554  | -5.480 | 0.000 | 0.000 | 2.028 |
| Zdhhc17   | 1.823  | 6.659  | 5.479  | 0.000 | 0.000 | 2.026 |
| Nes       | 2.529  | 5.633  | 5.479  | 0.000 | 0.000 | 2.026 |
| Rnh1      | 1.026  | 9.534  | 5.479  | 0.000 | 0.000 | 2.025 |
| Wnt7a     | 2.262  | 4.453  | 5.479  | 0.000 | 0.000 | 2.025 |
| Rab15     | 1.250  | 6.581  | 5.478  | 0.000 | 0.000 | 2.024 |
| 2810455B  | 1.195  | 3.819  | 5.478  | 0.000 | 0.000 | 2.024 |
| Ercc1     | 1.577  | 7.426  | 5.477  | 0.000 | 0.000 | 2.023 |
| Dock3     | -1.041 | 3.087  | -5.477 | 0.000 | 0.000 | 2.022 |
| 2610005L  | 1.258  | 5.781  | 5.476  | 0.000 | 0.000 | 2.019 |
| 281047401 | 2.403  | 8.104  | 5.475  | 0.000 | 0.000 | 2.018 |
| Sorcs2    | 2.123  | 5.388  | 5.475  | 0.000 | 0.000 | 2.016 |
| Brpf3     | 1.644  | 5.190  | 5.475  | 0.000 | 0.000 | 2.016 |
| Tmem43    | 1.589  | 7.042  | 5.469  | 0.000 | 0.000 | 2.004 |
| Abcg2     | 1.766  | 5.250  | 5.468  | 0.000 | 0.000 | 2.001 |
| Ndufc1    | -1.005 | 9.981  | -5.466 | 0.000 | 0.000 | 1.997 |
| Pgk1      | 1.136  | 11.077 | 5.465  | 0.000 | 0.000 | 1.996 |
| AI429363  | 1.357  | 4.371  | 5.461  | 0.000 | 0.000 | 1.986 |
| Cel       | -2.909 | 4.540  | -5.459 | 0.000 | 0.000 | 1.982 |
| Rnf157    | 1.620  | 4.679  | 5.458  | 0.000 | 0.000 | 1.981 |
| Dok7      | -1.042 | 5.501  | -5.457 | 0.000 | 0.000 | 1.978 |
| LOC100045 | -2.602 | 5.293  | -5.457 | 0.000 | 0.000 | 1.977 |
| Laptm5    | 2.580  | 5.665  | 5.454  | 0.000 | 0.000 | 1.972 |
| Cxcl1     | 3.613  | 5.949  | 5.454  | 0.000 | 0.000 | 1.972 |
| Azgp1     | -2.216 | 4.172  | -5.454 | 0.000 | 0.000 | 1.971 |
| Maf       | 1.828  | 4.507  | 5.453  | 0.000 | 0.000 | 1.970 |
| Krt5      | -2.444 | 4.646  | -5.453 | 0.000 | 0.000 | 1.970 |
| D030056L2 | 2.297  | 6.585  | 5.453  | 0.000 | 0.000 | 1.970 |
| Ski       | 1.080  | 7.450  | 5.453  | 0.000 | 0.000 | 1.969 |
| Chst15    | 1.625  | 4.589  | 5.451  | 0.000 | 0.000 | 1.965 |
| Dcaf5     | 1.029  | 4.235  | 5.449  | 0.000 | 0.000 | 1.961 |
| Tpml      | 2.074  | 9.750  | 5.447  | 0.000 | 0.000 | 1.956 |
| Nhs11     | 1.850  | 6.760  | 5.446  | 0.000 | 0.000 | 1.955 |
| AI120166  | 1.316  | 3.648  | 5.444  | 0.000 | 0.000 | 1.951 |
| Wdfy1     | 1.588  | 5.369  | 5.442  | 0.000 | 0.000 | 1.946 |
| D11Ert71  | 1.325  | 5.573  | 5.442  | 0.000 | 0.000 | 1.946 |
| Smarcc1   | 1.246  | 8.569  | 5.442  | 0.000 | 0.000 | 1.945 |
| Aoc3      | 1.274  | 4.674  | 5.441  | 0.000 | 0.000 | 1.944 |
| Crip2     | 2.196  | 8.301  | 5.439  | 0.000 | 0.000 | 1.940 |

|           |        |       |        |       |       |       |
|-----------|--------|-------|--------|-------|-------|-------|
| Spnb2     | 1.964  | 7.211 | 5.439  | 0.000 | 0.000 | 1.938 |
| 9630009C1 | 2.107  | 4.188 | 5.439  | 0.000 | 0.000 | 1.938 |
| Rsrc2     | 1.591  | 5.577 | 5.438  | 0.000 | 0.000 | 1.938 |
| Hsd17b6   | -1.695 | 3.322 | -5.435 | 0.000 | 0.000 | 1.931 |
| Plekhf1   | 1.638  | 6.677 | 5.432  | 0.000 | 0.000 | 1.924 |
| Plekha2   | 1.835  | 9.304 | 5.432  | 0.000 | 0.000 | 1.924 |
| D630032NC | -1.146 | 4.000 | -5.432 | 0.000 | 0.000 | 1.923 |
| Emilin2   | 2.732  | 6.281 | 5.428  | 0.000 | 0.000 | 1.915 |
| Pde7a     | 1.201  | 4.293 | 5.427  | 0.000 | 0.000 | 1.913 |
| Lgals12   | -2.431 | 3.736 | -5.426 | 0.000 | 0.000 | 1.911 |
| Ccnd1     | 2.229  | 8.844 | 5.425  | 0.000 | 0.000 | 1.909 |
| Apol9a    | 2.505  | 5.826 | 5.424  | 0.000 | 0.000 | 1.907 |
| H2-DMa    | 2.550  | 5.804 | 5.423  | 0.000 | 0.000 | 1.904 |
| Lypd6     | -2.415 | 3.920 | -5.420 | 0.000 | 0.000 | 1.898 |
| Tmem158   | 2.317  | 6.213 | 5.418  | 0.000 | 0.000 | 1.893 |
| Sec23a    | 1.806  | 8.599 | 5.417  | 0.000 | 0.000 | 1.890 |
| Bst1      | 3.354  | 5.482 | 5.417  | 0.000 | 0.000 | 1.890 |
| Bmp4      | 2.441  | 5.268 | 5.414  | 0.000 | 0.000 | 1.884 |
| LOC100046 | 1.934  | 7.109 | 5.411  | 0.000 | 0.000 | 1.877 |
| Wdr60     | 1.161  | 4.942 | 5.410  | 0.000 | 0.000 | 1.875 |
| Neto2     | 1.473  | 4.136 | 5.409  | 0.000 | 0.000 | 1.874 |
| Syncrip   | 2.370  | 6.702 | 5.408  | 0.000 | 0.000 | 1.872 |
| 4833412E1 | 1.166  | 4.503 | 5.406  | 0.000 | 0.000 | 1.866 |
| Plcg1     | 1.830  | 7.467 | 5.405  | 0.000 | 0.000 | 1.864 |
| Kbtbd8    | -1.717 | 3.563 | -5.402 | 0.000 | 0.000 | 1.859 |
| Acad11    | -1.744 | 7.044 | -5.398 | 0.000 | 0.000 | 1.850 |
| I11r12    | 1.474  | 4.754 | 5.397  | 0.000 | 0.000 | 1.847 |
| LOC100044 | 1.555  | 6.073 | 5.396  | 0.000 | 0.000 | 1.846 |
| Fam101b   | -1.692 | 8.963 | -5.394 | 0.000 | 0.000 | 1.842 |
| Ckmt1     | -4.708 | 7.237 | -5.393 | 0.000 | 0.000 | 1.838 |
| 7120451JC | 1.805  | 5.063 | 5.392  | 0.000 | 0.000 | 1.836 |
| Fxr1      | 2.315  | 8.104 | 5.391  | 0.000 | 0.000 | 1.834 |
| Ik        | 1.099  | 7.630 | 5.391  | 0.000 | 0.000 | 1.833 |
| Btg3      | 1.047  | 9.740 | 5.389  | 0.000 | 0.000 | 1.830 |
| 2510012JC | 1.790  | 6.416 | 5.388  | 0.000 | 0.000 | 1.828 |
| Dctn1     | 1.283  | 6.405 | 5.387  | 0.000 | 0.000 | 1.826 |
| Ndufs6    | -1.083 | 9.776 | -5.387 | 0.000 | 0.000 | 1.826 |
| Prdm4     | 1.192  | 6.028 | 5.385  | 0.000 | 0.000 | 1.821 |
| 4933407CC | 1.330  | 7.727 | 5.384  | 0.000 | 0.000 | 1.819 |
| Cckar     | -2.149 | 3.498 | -5.383 | 0.000 | 0.000 | 1.816 |
| Adhfe1    | -1.606 | 4.479 | -5.376 | 0.000 | 0.000 | 1.802 |
| Fam133b   | 2.586  | 6.992 | 5.375  | 0.000 | 0.000 | 1.800 |
| Irs1      | 2.309  | 6.867 | 5.374  | 0.000 | 0.000 | 1.798 |
| Smurf1    | 1.591  | 6.371 | 5.373  | 0.000 | 0.000 | 1.796 |
| Mpp7      | -1.229 | 4.407 | -5.373 | 0.000 | 0.000 | 1.795 |
| Ugt8a     | -3.334 | 4.642 | -5.373 | 0.000 | 0.000 | 1.795 |
| Atg9b     | 3.311  | 5.905 | 5.371  | 0.000 | 0.000 | 1.790 |
| Tacc1     | 1.545  | 6.900 | 5.371  | 0.000 | 0.000 | 1.790 |
| Lat2      | 1.243  | 4.082 | 5.370  | 0.000 | 0.000 | 1.787 |
| Cbr3      | -2.595 | 8.818 | -5.369 | 0.000 | 0.000 | 1.787 |

|           |        |        |        |       |       |       |
|-----------|--------|--------|--------|-------|-------|-------|
| Lta       | -1.022 | 3.035  | -5.366 | 0.000 | 0.000 | 1.779 |
| Ehbp1     | 1.596  | 6.370  | 5.365  | 0.000 | 0.000 | 1.777 |
| Anapc4    | 1.467  | 6.172  | 5.365  | 0.000 | 0.000 | 1.777 |
| Cldn4     | 3.215  | 7.006  | 5.363  | 0.000 | 0.000 | 1.773 |
| 9030425E1 | 1.994  | 4.618  | 5.363  | 0.000 | 0.000 | 1.773 |
| Amot12    | 1.337  | 6.921  | 5.361  | 0.000 | 0.000 | 1.768 |
| Crebbp    | 1.311  | 6.023  | 5.360  | 0.000 | 0.000 | 1.766 |
| 9530068E0 | 1.893  | 9.311  | 5.360  | 0.000 | 0.000 | 1.766 |
| Clca1     | 3.153  | 4.978  | 5.358  | 0.000 | 0.000 | 1.763 |
| Creb312   | 1.950  | 5.871  | 5.358  | 0.000 | 0.000 | 1.762 |
| Pnoc      | -2.073 | 3.592  | -5.357 | 0.000 | 0.000 | 1.761 |
| Zc3h4     | 1.879  | 6.761  | 5.356  | 0.000 | 0.000 | 1.758 |
| 1110046J0 | 2.074  | 4.322  | 5.355  | 0.000 | 0.000 | 1.756 |
| 2810025M1 | 1.813  | 6.402  | 5.354  | 0.000 | 0.000 | 1.753 |
| Dusp22    | 1.734  | 5.657  | 5.353  | 0.000 | 0.000 | 1.752 |
| Afap111   | 1.801  | 5.600  | 5.351  | 0.000 | 0.000 | 1.747 |
| Atg2b     | 1.213  | 5.035  | 5.350  | 0.000 | 0.000 | 1.746 |
| I16       | 2.294  | 4.387  | 5.349  | 0.000 | 0.000 | 1.742 |
| Zzz3      | 1.759  | 8.343  | 5.346  | 0.000 | 0.000 | 1.736 |
| AI956758  | 1.292  | 4.155  | 5.344  | 0.000 | 0.000 | 1.732 |
| Scai      | 1.454  | 4.747  | 5.344  | 0.000 | 0.000 | 1.732 |
| Btbd3     | -2.076 | 5.075  | -5.344 | 0.000 | 0.000 | 1.731 |
| Eps15     | 1.166  | 6.697  | 5.342  | 0.000 | 0.000 | 1.727 |
| Casp8     | 1.219  | 8.347  | 5.341  | 0.000 | 0.000 | 1.724 |
| 6430548M0 | -1.196 | 4.949  | -5.336 | 0.000 | 0.000 | 1.714 |
| L1gl1     | 1.729  | 7.873  | 5.335  | 0.000 | 0.000 | 1.712 |
| Sardh     | 1.120  | 5.230  | 5.335  | 0.000 | 0.000 | 1.711 |
| K1hl5     | 2.366  | 7.583  | 5.335  | 0.000 | 0.000 | 1.711 |
| Cyp2f2    | -2.707 | 3.822  | -5.333 | 0.000 | 0.000 | 1.708 |
| Polr3h    | 1.187  | 5.981  | 5.332  | 0.000 | 0.000 | 1.705 |
| Ecscr     | 3.005  | 6.932  | 5.331  | 0.000 | 0.000 | 1.704 |
| 9030411K0 | 1.315  | 4.215  | 5.330  | 0.000 | 0.000 | 1.700 |
| Pla2g5    | -3.387 | 3.844  | -5.322 | 0.000 | 0.000 | 1.683 |
| Ly6g6e    | -3.097 | 4.808  | -5.320 | 0.000 | 0.000 | 1.679 |
| AI837181  | 1.003  | 6.275  | 5.319  | 0.000 | 0.000 | 1.678 |
| Cyth4     | 1.708  | 4.834  | 5.318  | 0.000 | 0.000 | 1.675 |
| Tbc1d10b  | 1.225  | 7.473  | 5.317  | 0.000 | 0.000 | 1.672 |
| Tshz3     | 1.660  | 3.889  | 5.316  | 0.000 | 0.000 | 1.670 |
| Prps2     | -1.628 | 5.470  | -5.315 | 0.000 | 0.000 | 1.667 |
| Car2      | -3.617 | 9.812  | -5.314 | 0.000 | 0.000 | 1.667 |
| BC094435  | 1.619  | 11.141 | 5.313  | 0.000 | 0.000 | 1.663 |
| Cd200     | 2.030  | 5.342  | 5.312  | 0.000 | 0.000 | 1.661 |
| R1f       | 1.876  | 6.945  | 5.311  | 0.000 | 0.000 | 1.660 |
| Ccny      | 1.231  | 5.732  | 5.310  | 0.000 | 0.000 | 1.658 |
| Pom121    | 1.309  | 6.901  | 5.310  | 0.000 | 0.000 | 1.658 |
| Pacs1     | 1.313  | 5.771  | 5.310  | 0.000 | 0.000 | 1.657 |
| Napsa     | 2.471  | 4.944  | 5.309  | 0.000 | 0.000 | 1.655 |
| Wispl     | 1.477  | 4.647  | 5.306  | 0.000 | 0.000 | 1.648 |
| Inpp5d    | 1.393  | 6.230  | 5.306  | 0.000 | 0.000 | 1.648 |
| Tpk1      | -1.966 | 6.380  | -5.303 | 0.000 | 0.000 | 1.643 |



|           |        |        |        |       |       |       |
|-----------|--------|--------|--------|-------|-------|-------|
| Cln6      | -1.014 | 4.807  | -5.303 | 0.000 | 0.000 | 1.643 |
| Metrn     | 1.498  | 6.057  | 5.303  | 0.000 | 0.000 | 1.642 |
| Smc5      | 1.497  | 5.605  | 5.301  | 0.000 | 0.000 | 1.637 |
| Arnt      | 1.026  | 7.058  | 5.300  | 0.000 | 0.000 | 1.636 |
| Tpcn2     | 1.026  | 4.660  | 5.300  | 0.000 | 0.000 | 1.636 |
| Hcfc1     | 1.441  | 4.506  | 5.293  | 0.000 | 0.000 | 1.620 |
| Fgfr3     | -1.380 | 4.175  | -5.293 | 0.000 | 0.000 | 1.620 |
| Cd2bp2    | 1.262  | 6.894  | 5.293  | 0.000 | 0.000 | 1.619 |
| 4930542D1 | -1.044 | 4.440  | -5.292 | 0.000 | 0.000 | 1.618 |
| Tmed2     | 1.889  | 8.220  | 5.292  | 0.000 | 0.000 | 1.617 |
| C130075A2 | 1.621  | 4.421  | 5.290  | 0.000 | 0.000 | 1.614 |
| 2010001K2 | -1.625 | 3.540  | -5.289 | 0.000 | 0.000 | 1.611 |
| Evc2      | 1.786  | 4.898  | 5.288  | 0.000 | 0.000 | 1.610 |
| Gpx3      | 2.742  | 7.824  | 5.288  | 0.000 | 0.000 | 1.608 |
| Yy1       | 1.787  | 9.523  | 5.284  | 0.000 | 0.000 | 1.600 |
| Spna2     | 1.285  | 9.945  | 5.280  | 0.000 | 0.000 | 1.592 |
| Cd52      | 2.848  | 7.542  | 5.278  | 0.000 | 0.000 | 1.588 |
| Ankrd16   | 1.447  | 7.069  | 5.278  | 0.000 | 0.000 | 1.586 |
| Chic2     | 2.173  | 8.562  | 5.276  | 0.000 | 0.000 | 1.582 |
| Zswim6    | 1.891  | 7.610  | 5.274  | 0.000 | 0.000 | 1.577 |
| Camsap1   | 1.037  | 6.462  | 5.273  | 0.000 | 0.000 | 1.576 |
| Ggt6      | -1.567 | 4.003  | -5.273 | 0.000 | 0.000 | 1.576 |
| Unkl      | 1.698  | 6.197  | 5.273  | 0.000 | 0.000 | 1.576 |
| Hspala    | -2.705 | 6.802  | -5.270 | 0.000 | 0.000 | 1.571 |
| Cyp7b1    | 2.130  | 4.365  | 5.265  | 0.000 | 0.000 | 1.559 |
| Tmem30b   | -4.883 | 7.994  | -5.264 | 0.000 | 0.000 | 1.555 |
| Fmn12     | 2.413  | 9.224  | 5.258  | 0.000 | 0.000 | 1.543 |
| Gnpda2    | 2.344  | 6.703  | 5.258  | 0.000 | 0.000 | 1.543 |
| Chac1     | 1.318  | 5.082  | 5.258  | 0.000 | 0.000 | 1.542 |
| Bdh1      | -2.188 | 3.870  | -5.257 | 0.000 | 0.000 | 1.542 |
| Arf2      | 1.739  | 7.359  | 5.257  | 0.000 | 0.000 | 1.542 |
| Dap       | 1.439  | 9.616  | 5.256  | 0.000 | 0.000 | 1.540 |
| Pde8a     | -1.502 | 7.005  | -5.254 | 0.000 | 0.000 | 1.535 |
| Timm9     | 1.223  | 3.930  | 5.253  | 0.000 | 0.000 | 1.533 |
| Smyd5     | 1.288  | 4.653  | 5.252  | 0.000 | 0.000 | 1.530 |
| U46068    | -4.117 | 5.922  | -5.252 | 0.000 | 0.000 | 1.530 |
| S100a6    | 1.716  | 12.269 | 5.250  | 0.000 | 0.000 | 1.527 |
| Hhex      | 2.743  | 6.709  | 5.250  | 0.000 | 0.000 | 1.526 |
| 9330156P  | 1.176  | 4.989  | 5.249  | 0.000 | 0.000 | 1.523 |
| Rps6kb2   | 1.016  | 4.761  | 5.245  | 0.000 | 0.001 | 1.515 |
| Camk1d    | 1.223  | 4.559  | 5.243  | 0.000 | 0.001 | 1.510 |
| 2810046L  | 1.083  | 4.734  | 5.242  | 0.000 | 0.001 | 1.509 |
| Macf1     | 1.406  | 8.178  | 5.241  | 0.000 | 0.001 | 1.505 |
| Pbld      | -1.066 | 3.176  | -5.236 | 0.000 | 0.001 | 1.495 |
| 5330417H1 | -1.034 | 3.250  | -5.235 | 0.000 | 0.001 | 1.493 |
| Cxcl14    | 2.110  | 4.580  | 5.229  | 0.000 | 0.001 | 1.479 |
| 9130007G1 | -1.090 | 4.577  | -5.229 | 0.000 | 0.001 | 1.479 |
| Nfrkb     | 1.036  | 7.236  | 5.226  | 0.000 | 0.001 | 1.472 |
| Utp6      | 1.609  | 6.239  | 5.223  | 0.000 | 0.001 | 1.465 |
| Wnk1      | 2.091  | 9.556  | 5.222  | 0.000 | 0.001 | 1.465 |

|           |        |       |        |       |       |       |
|-----------|--------|-------|--------|-------|-------|-------|
| Tm6sf1    | 1.999  | 4.177 | 5.220  | 0.000 | 0.001 | 1.460 |
| LOC100047 | 1.479  | 7.182 | 5.220  | 0.000 | 0.001 | 1.460 |
| Wls       | 1.663  | 9.026 | 5.218  | 0.000 | 0.001 | 1.455 |
| Hook3     | 1.565  | 7.212 | 5.216  | 0.000 | 0.001 | 1.451 |
| Clec4e    | 1.987  | 4.356 | 5.216  | 0.000 | 0.001 | 1.450 |
| Wasf1     | 1.659  | 4.007 | 5.215  | 0.000 | 0.001 | 1.448 |
| Pyy       | -2.761 | 4.290 | -5.211 | 0.000 | 0.001 | 1.439 |
| Ugt2b35   | -4.033 | 5.981 | -5.207 | 0.000 | 0.001 | 1.431 |
| AW146020  | 1.271  | 5.117 | 5.205  | 0.000 | 0.001 | 1.427 |
| AI415730  | 1.028  | 3.409 | 5.205  | 0.000 | 0.001 | 1.427 |
| Apoc2     | 2.375  | 6.267 | 5.204  | 0.000 | 0.001 | 1.425 |
| Adprh     | 1.587  | 7.864 | 5.204  | 0.000 | 0.001 | 1.425 |
| Polr2a    | -1.602 | 4.061 | -5.203 | 0.000 | 0.001 | 1.423 |
| Prtn3     | 2.480  | 5.260 | 5.202  | 0.000 | 0.001 | 1.420 |
| Wnt4      | 2.081  | 6.004 | 5.201  | 0.000 | 0.001 | 1.419 |
| Pofut1    | 1.154  | 6.814 | 5.199  | 0.000 | 0.001 | 1.414 |
| Agl       | 1.283  | 5.172 | 5.199  | 0.000 | 0.001 | 1.414 |
| B630005N1 | 2.094  | 6.815 | 5.199  | 0.000 | 0.001 | 1.414 |
| Arhgap32  | -1.935 | 4.905 | -5.198 | 0.000 | 0.001 | 1.412 |
| Ash21     | 1.173  | 4.389 | 5.198  | 0.000 | 0.001 | 1.412 |
| Acss2     | -2.791 | 6.425 | -5.198 | 0.000 | 0.001 | 1.411 |
| Rab8b     | 2.573  | 6.957 | 5.196  | 0.000 | 0.001 | 1.408 |
| Cyb5r1    | 2.035  | 7.511 | 5.195  | 0.000 | 0.001 | 1.405 |
| Fabp5     | -2.032 | 8.806 | -5.193 | 0.000 | 0.001 | 1.401 |
| Sctr      | -1.350 | 3.496 | -5.193 | 0.000 | 0.001 | 1.399 |
| Oaz2      | 2.081  | 7.894 | 5.191  | 0.000 | 0.001 | 1.397 |
| Tmem185b  | 1.757  | 6.631 | 5.189  | 0.000 | 0.001 | 1.390 |
| Kcnk10    | -1.229 | 3.387 | -5.187 | 0.000 | 0.001 | 1.388 |
| 5430435G2 | 1.526  | 4.769 | 5.186  | 0.000 | 0.001 | 1.385 |
| 1110012DC | 1.665  | 5.700 | 5.185  | 0.000 | 0.001 | 1.383 |
| Pik3r1    | -1.821 | 6.710 | -5.184 | 0.000 | 0.001 | 1.380 |
| Pppl1a    | -1.025 | 3.747 | -5.183 | 0.000 | 0.001 | 1.377 |
| Arap1     | 1.324  | 5.656 | 5.182  | 0.000 | 0.001 | 1.376 |
| 7-Mar     | 1.587  | 9.547 | 5.182  | 0.000 | 0.001 | 1.375 |
| Hepacam2  | -2.041 | 3.685 | -5.181 | 0.000 | 0.001 | 1.373 |
| Traf7     | 1.046  | 6.931 | 5.179  | 0.000 | 0.001 | 1.371 |
| Psca      | -5.203 | 7.461 | -5.179 | 0.000 | 0.001 | 1.370 |
| Ccl12     | 2.877  | 5.067 | 5.179  | 0.000 | 0.001 | 1.369 |
| Cela1     | -3.348 | 9.299 | -5.178 | 0.000 | 0.001 | 1.368 |
| LOC100046 | 1.456  | 6.663 | 5.178  | 0.000 | 0.001 | 1.368 |
| 5730480HC | 1.150  | 5.061 | 5.178  | 0.000 | 0.001 | 1.367 |
| Inf2      | 1.458  | 4.856 | 5.177  | 0.000 | 0.001 | 1.365 |
| Gk5       | -2.053 | 6.265 | -5.175 | 0.000 | 0.001 | 1.360 |
| Arhgef5   | 1.684  | 9.069 | 5.175  | 0.000 | 0.001 | 1.360 |
| Rapgef3   | 1.538  | 4.968 | 5.173  | 0.000 | 0.001 | 1.357 |
| Gp1bb     | 1.119  | 4.541 | 5.172  | 0.000 | 0.001 | 1.353 |
| 6720475J1 | 2.278  | 6.933 | 5.168  | 0.000 | 0.001 | 1.344 |
| BC005512  | -1.597 | 2.957 | -5.167 | 0.000 | 0.001 | 1.343 |
| Mast3     | 1.541  | 6.297 | 5.164  | 0.000 | 0.001 | 1.337 |
| Abcb9     | -1.607 | 3.794 | -5.164 | 0.000 | 0.001 | 1.337 |

|           |        |        |        |       |       |       |
|-----------|--------|--------|--------|-------|-------|-------|
| Cybb      | 1.938  | 4.454  | 5.162  | 0.000 | 0.001 | 1.332 |
| Obfc2b    | -1.036 | 5.912  | -5.161 | 0.000 | 0.001 | 1.330 |
| Fam164a   | 1.957  | 6.374  | 5.161  | 0.000 | 0.001 | 1.330 |
| Tnks2     | 1.009  | 10.584 | 5.159  | 0.000 | 0.001 | 1.326 |
| Med31     | 1.414  | 7.563  | 5.158  | 0.000 | 0.001 | 1.323 |
| 90306220z | -2.792 | 5.593  | -5.157 | 0.000 | 0.001 | 1.320 |
| LOC67722z | 1.846  | 5.607  | 5.156  | 0.000 | 0.001 | 1.319 |
| Hibadh    | -1.429 | 8.764  | -5.155 | 0.000 | 0.001 | 1.316 |
| Mgst3     | -1.900 | 10.397 | -5.152 | 0.000 | 0.001 | 1.311 |
| F7        | 2.627  | 4.760  | 5.152  | 0.000 | 0.001 | 1.310 |
| Mef2c     | 1.716  | 4.598  | 5.151  | 0.000 | 0.001 | 1.307 |
| Gm5480    | -2.301 | 9.004  | -5.149 | 0.000 | 0.001 | 1.304 |
| LOC10004z | 1.547  | 7.193  | 5.148  | 0.000 | 0.001 | 1.301 |
| 4833442J1 | 2.293  | 7.357  | 5.147  | 0.000 | 0.001 | 1.300 |
| Auh       | -1.440 | 7.404  | -5.147 | 0.000 | 0.001 | 1.299 |
| Ptpa      | 1.754  | 7.651  | 5.147  | 0.000 | 0.001 | 1.298 |
| Asx11     | 1.783  | 7.308  | 5.145  | 0.000 | 0.001 | 1.296 |
| Sirpbla   | 2.353  | 5.025  | 5.138  | 0.000 | 0.001 | 1.278 |
| Atp6v0d2  | 2.164  | 5.892  | 5.137  | 0.000 | 0.001 | 1.278 |
| Pck2      | 1.432  | 7.113  | 5.137  | 0.000 | 0.001 | 1.276 |
| Pfdn2     | 1.375  | 9.232  | 5.135  | 0.000 | 0.001 | 1.273 |
| Mndal     | 2.954  | 6.141  | 5.135  | 0.000 | 0.001 | 1.273 |
| A130001G  | 1.063  | 4.114  | 5.134  | 0.000 | 0.001 | 1.271 |
| Myo1h     | 1.110  | 3.913  | 5.133  | 0.000 | 0.001 | 1.268 |
| Rcn3      | 2.140  | 5.935  | 5.131  | 0.000 | 0.001 | 1.264 |
| E430024I  | 1.493  | 4.313  | 5.131  | 0.000 | 0.001 | 1.263 |
| Rars2     | -1.142 | 7.746  | -5.129 | 0.000 | 0.001 | 1.258 |
| Wbscr27   | 1.713  | 5.077  | 5.129  | 0.000 | 0.001 | 1.258 |
| Trpv2     | 1.219  | 4.066  | 5.126  | 0.000 | 0.001 | 1.253 |
| Reps2     | -2.464 | 4.988  | -5.123 | 0.000 | 0.001 | 1.245 |
| Lpp       | 1.178  | 6.653  | 5.120  | 0.000 | 0.001 | 1.240 |
| Zfp101    | -1.041 | 5.416  | -5.118 | 0.000 | 0.001 | 1.235 |
| 9-Sep     | 1.397  | 8.989  | 5.117  | 0.000 | 0.001 | 1.234 |
| Rabgap1   | 1.833  | 8.153  | 5.117  | 0.000 | 0.001 | 1.233 |
| Pla2g6    | 1.817  | 5.605  | 5.117  | 0.000 | 0.001 | 1.232 |
| Dapl1     | -1.841 | 4.116  | -5.116 | 0.000 | 0.001 | 1.231 |
| Endog     | -1.572 | 6.543  | -5.115 | 0.000 | 0.001 | 1.228 |
| Cd163     | 2.726  | 5.064  | 5.110  | 0.000 | 0.001 | 1.218 |
| Ywhah     | 1.612  | 9.406  | 5.109  | 0.000 | 0.001 | 1.216 |
| Shroom4   | 1.638  | 4.567  | 5.109  | 0.000 | 0.001 | 1.215 |
| Rod1      | 1.843  | 5.619  | 5.109  | 0.000 | 0.001 | 1.214 |
| Rgp1      | 1.522  | 7.082  | 5.107  | 0.000 | 0.001 | 1.210 |
| Abtb2     | 1.367  | 4.970  | 5.103  | 0.000 | 0.001 | 1.202 |
| Dact1     | 1.283  | 4.771  | 5.102  | 0.000 | 0.001 | 1.199 |
| Rsf1      | 1.230  | 5.314  | 5.101  | 0.000 | 0.001 | 1.197 |
| Cxcl13    | 3.861  | 6.703  | 5.100  | 0.000 | 0.001 | 1.195 |
| Zfand3    | 1.628  | 7.690  | 5.100  | 0.000 | 0.001 | 1.194 |
| Clec10a   | 2.763  | 4.887  | 5.099  | 0.000 | 0.001 | 1.194 |
| Ppp3ca    | 2.002  | 8.443  | 5.097  | 0.000 | 0.001 | 1.189 |
| Tax1bp3   | 1.828  | 9.334  | 5.097  | 0.000 | 0.001 | 1.189 |

|           |        |        |        |       |       |       |
|-----------|--------|--------|--------|-------|-------|-------|
| 3010027Cz | -1.062 | 3.083  | -5.097 | 0.000 | 0.001 | 1.188 |
| Fhod3     | 1.158  | 3.571  | 5.096  | 0.000 | 0.001 | 1.186 |
| Nexn      | 2.003  | 3.978  | 5.094  | 0.000 | 0.001 | 1.183 |
| Aif1      | 2.381  | 5.142  | 5.092  | 0.000 | 0.001 | 1.177 |
| Ppif      | -2.313 | 6.866  | -5.091 | 0.000 | 0.001 | 1.175 |
| LOC72520  | -1.311 | 3.368  | -5.089 | 0.000 | 0.001 | 1.171 |
| Dmtf1     | 1.262  | 8.038  | 5.086  | 0.000 | 0.001 | 1.165 |
| Lgals2    | -4.810 | 8.762  | -5.085 | 0.000 | 0.001 | 1.161 |
| Ythdc1    | 2.266  | 7.482  | 5.084  | 0.000 | 0.001 | 1.161 |
| Cwf1912   | 1.026  | 3.904  | 5.083  | 0.000 | 0.001 | 1.158 |
| Mlxip     | 1.527  | 7.064  | 5.081  | 0.000 | 0.001 | 1.153 |
| Ung       | -1.509 | 5.762  | -5.080 | 0.000 | 0.001 | 1.152 |
| Slc22a17  | -1.339 | 5.324  | -5.078 | 0.000 | 0.001 | 1.148 |
| Pcdh17    | 1.002  | 3.651  | 5.077  | 0.000 | 0.001 | 1.145 |
| Nqo1      | -4.225 | 6.754  | -5.077 | 0.000 | 0.001 | 1.144 |
| Eml3      | 1.627  | 5.971  | 5.075  | 0.000 | 0.001 | 1.141 |
| 5830408Cz | 1.151  | 3.920  | 5.073  | 0.000 | 0.001 | 1.137 |
| Abcc1     | 1.835  | 5.378  | 5.071  | 0.000 | 0.001 | 1.130 |
| Sppl3     | 1.365  | 5.982  | 5.067  | 0.000 | 0.001 | 1.123 |
| Ofd1      | 1.303  | 5.479  | 5.064  | 0.000 | 0.001 | 1.116 |
| Ino80c    | 1.353  | 7.090  | 5.062  | 0.000 | 0.001 | 1.112 |
| Cd9912    | 1.215  | 5.589  | 5.061  | 0.000 | 0.001 | 1.109 |
| Cbl       | 1.364  | 6.761  | 5.059  | 0.000 | 0.001 | 1.106 |
| Gstm7     | -2.046 | 4.845  | -5.059 | 0.000 | 0.001 | 1.105 |
| Ap1s1     | 1.142  | 7.849  | 5.059  | 0.000 | 0.001 | 1.105 |
| Rab20     | 1.118  | 5.916  | 5.058  | 0.000 | 0.001 | 1.102 |
| LOC100047 | 1.741  | 7.527  | 5.057  | 0.000 | 0.001 | 1.100 |
| Ubr4      | 1.100  | 7.636  | 5.056  | 0.000 | 0.001 | 1.098 |
| Paqr4     | -2.192 | 5.691  | -5.055 | 0.000 | 0.001 | 1.097 |
| Npc2      | 1.935  | 10.268 | 5.054  | 0.000 | 0.001 | 1.094 |
| Rras2     | 1.734  | 8.358  | 5.051  | 0.000 | 0.001 | 1.087 |
| Fbxo9     | -1.256 | 8.598  | -5.050 | 0.000 | 0.001 | 1.085 |
| Dusp16    | 1.422  | 8.003  | 5.050  | 0.000 | 0.001 | 1.084 |
| Isoc1     | -1.883 | 7.332  | -5.050 | 0.000 | 0.001 | 1.084 |
| H2afb3    | -1.007 | 4.234  | -5.050 | 0.000 | 0.001 | 1.084 |
| Uhrf2     | 1.379  | 4.734  | 5.048  | 0.000 | 0.001 | 1.081 |
| Gga2      | -2.372 | 7.397  | -5.048 | 0.000 | 0.001 | 1.080 |
| Map3k6    | 1.624  | 4.232  | 5.048  | 0.000 | 0.001 | 1.080 |
| Hif1a     | 1.920  | 6.419  | 5.048  | 0.000 | 0.001 | 1.079 |
| Ccb12     | -2.325 | 5.900  | -5.047 | 0.000 | 0.001 | 1.078 |
| Sh3bp5    | 1.301  | 4.637  | 5.047  | 0.000 | 0.001 | 1.078 |
| Nap114    | 1.189  | 7.782  | 5.046  | 0.000 | 0.001 | 1.077 |
| Ap1m2     | -2.241 | 7.101  | -5.042 | 0.000 | 0.001 | 1.066 |
| Cdkn2d    | 1.501  | 6.453  | 5.041  | 0.000 | 0.001 | 1.065 |
| 6030468B1 | -1.179 | 4.079  | -5.041 | 0.000 | 0.001 | 1.065 |
| Thumpd1   | 1.087  | 6.431  | 5.041  | 0.000 | 0.001 | 1.065 |
| Mtmr10    | 1.269  | 6.820  | 5.040  | 0.000 | 0.001 | 1.062 |
| Ppplr2    | 1.917  | 7.776  | 5.040  | 0.000 | 0.001 | 1.062 |
| 1700021Fc | -1.269 | 7.230  | -5.039 | 0.000 | 0.001 | 1.061 |
| H2-Ea     | -1.099 | 4.721  | -5.034 | 0.000 | 0.001 | 1.050 |

|           |        |        |        |       |       |       |
|-----------|--------|--------|--------|-------|-------|-------|
| Zfp219    | 1.053  | 5.944  | 5.031  | 0.000 | 0.001 | 1.043 |
| Tspan9    | 1.857  | 7.339  | 5.029  | 0.000 | 0.001 | 1.037 |
| Spink4    | -3.999 | 6.958  | -5.028 | 0.000 | 0.001 | 1.036 |
| Pus71     | 1.169  | 5.878  | 5.028  | 0.000 | 0.001 | 1.036 |
| Emr1      | 2.041  | 5.319  | 5.024  | 0.000 | 0.001 | 1.027 |
| Ern2      | -4.170 | 6.766  | -5.024 | 0.000 | 0.001 | 1.027 |
| B230354K1 | 1.534  | 6.129  | 5.024  | 0.000 | 0.001 | 1.027 |
| Smyd2     | 1.280  | 8.438  | 5.022  | 0.000 | 0.001 | 1.023 |
| Clic4     | 1.744  | 6.819  | 5.021  | 0.000 | 0.001 | 1.021 |
| Fbxo32    | 1.165  | 5.288  | 5.021  | 0.000 | 0.001 | 1.020 |
| Btgl      | 1.943  | 10.287 | 5.020  | 0.000 | 0.001 | 1.019 |
| Lifr      | -1.751 | 5.108  | -5.020 | 0.000 | 0.001 | 1.018 |
| 1700031F1 | -1.033 | 3.048  | -5.018 | 0.000 | 0.001 | 1.014 |
| Muc5ac    | -5.883 | 8.248  | -5.017 | 0.000 | 0.001 | 1.013 |
| Tsc22d1   | 1.314  | 10.827 | 5.016  | 0.000 | 0.001 | 1.008 |
| Msra      | -1.994 | 6.226  | -5.011 | 0.000 | 0.001 | 0.999 |
| Kcnc4     | -1.228 | 3.827  | -5.011 | 0.000 | 0.001 | 0.998 |
| Rabep2    | 1.309  | 5.073  | 5.011  | 0.000 | 0.001 | 0.997 |
| Tcea3     | -2.512 | 5.650  | -5.010 | 0.000 | 0.001 | 0.996 |
| Reep2     | -1.128 | 3.697  | -5.010 | 0.000 | 0.001 | 0.995 |
| Macrodl   | -1.690 | 6.682  | -5.008 | 0.000 | 0.001 | 0.993 |
| Tmem136   | 1.774  | 4.083  | 5.008  | 0.000 | 0.001 | 0.991 |
| Dhx9      | 1.018  | 7.303  | 5.008  | 0.000 | 0.001 | 0.991 |
| Tspan1    | -4.260 | 8.182  | -5.007 | 0.000 | 0.001 | 0.990 |
| Adnp2     | 1.079  | 6.024  | 5.006  | 0.000 | 0.001 | 0.987 |
| BC021891  | -1.129 | 3.659  | -5.003 | 0.000 | 0.001 | 0.980 |
| Mical3    | 1.103  | 6.162  | 5.002  | 0.000 | 0.001 | 0.978 |
| Ccpgl     | -1.694 | 4.648  | -4.999 | 0.000 | 0.001 | 0.972 |
| Hplbp3    | 1.039  | 9.587  | 4.998  | 0.000 | 0.001 | 0.971 |
| Cdca4     | 1.496  | 7.711  | 4.998  | 0.000 | 0.001 | 0.970 |
| Hpd1      | -1.304 | 3.594  | -4.993 | 0.000 | 0.001 | 0.959 |
| Zdhhc2    | -1.832 | 5.145  | -4.992 | 0.000 | 0.001 | 0.957 |
| Egln3     | 1.976  | 6.242  | 4.992  | 0.000 | 0.001 | 0.957 |
| Fchsd1    | 1.023  | 3.907  | 4.992  | 0.000 | 0.001 | 0.956 |
| Ubr2      | 1.511  | 5.777  | 4.987  | 0.000 | 0.001 | 0.945 |
| Adamts6   | 1.601  | 3.980  | 4.985  | 0.000 | 0.001 | 0.940 |
| 5730409E  | 1.482  | 4.382  | 4.984  | 0.000 | 0.001 | 0.938 |
| Casp6     | -1.355 | 9.724  | -4.983 | 0.000 | 0.001 | 0.937 |
| Stac      | 1.109  | 3.876  | 4.983  | 0.000 | 0.001 | 0.937 |
| 4930579G  | 1.793  | 4.561  | 4.975  | 0.000 | 0.001 | 0.918 |
| Zfp53     | 1.129  | 4.380  | 4.974  | 0.000 | 0.001 | 0.916 |
| Baz2b     | 1.040  | 7.015  | 4.973  | 0.000 | 0.001 | 0.915 |
| Mmp8      | 1.016  | 3.668  | 4.972  | 0.000 | 0.001 | 0.913 |
| Tpil      | 1.098  | 10.982 | 4.972  | 0.000 | 0.001 | 0.911 |
| Srpk2     | 1.349  | 7.198  | 4.971  | 0.000 | 0.001 | 0.910 |
| Sepnl     | 1.378  | 6.124  | 4.969  | 0.000 | 0.001 | 0.906 |
| Tmem63a   | -1.104 | 8.676  | -4.969 | 0.000 | 0.001 | 0.904 |
| Ddx41     | 1.157  | 6.637  | 4.968  | 0.000 | 0.001 | 0.903 |
| Hdac6     | 1.740  | 7.616  | 4.966  | 0.000 | 0.001 | 0.899 |
| Ddt       | -1.106 | 7.979  | -4.966 | 0.000 | 0.001 | 0.898 |

|           |        |       |        |       |       |       |
|-----------|--------|-------|--------|-------|-------|-------|
| Nolc1     | 1.505  | 7.254 | 4.965  | 0.000 | 0.001 | 0.896 |
| Tpd5212   | 1.553  | 7.775 | 4.962  | 0.000 | 0.001 | 0.890 |
| Aldh1a3   | 2.694  | 4.755 | 4.962  | 0.000 | 0.001 | 0.889 |
| Grem1     | 3.075  | 5.802 | 4.960  | 0.000 | 0.001 | 0.886 |
| Eif4b     | 1.470  | 8.879 | 4.960  | 0.000 | 0.001 | 0.884 |
| Amhr2     | -1.189 | 3.035 | -4.957 | 0.000 | 0.001 | 0.879 |
| Llg12     | -1.874 | 7.153 | -4.957 | 0.000 | 0.001 | 0.878 |
| Hspb8     | 1.661  | 5.577 | 4.956  | 0.000 | 0.001 | 0.876 |
| Fam115c   | -1.803 | 5.649 | -4.955 | 0.000 | 0.001 | 0.875 |
| Gtf3c3    | 1.522  | 6.108 | 4.955  | 0.000 | 0.001 | 0.873 |
| Tmem106a  | 1.529  | 5.124 | 4.954  | 0.000 | 0.001 | 0.872 |
| Fbln5     | 2.302  | 5.990 | 4.953  | 0.000 | 0.001 | 0.869 |
| Ehd2      | 1.834  | 5.823 | 4.951  | 0.000 | 0.001 | 0.866 |
| Cd3001b   | 1.848  | 4.078 | 4.949  | 0.000 | 0.001 | 0.862 |
| Ttc3      | 1.465  | 5.803 | 4.947  | 0.000 | 0.001 | 0.858 |
| Nr4a1     | -1.663 | 7.894 | -4.943 | 0.000 | 0.001 | 0.848 |
| Inpp5e    | 1.625  | 5.799 | 4.942  | 0.000 | 0.001 | 0.845 |
| Magee1    | 1.143  | 3.980 | 4.941  | 0.000 | 0.001 | 0.843 |
| Acadv1    | -1.310 | 8.313 | -4.941 | 0.000 | 0.001 | 0.843 |
| Klf3      | 1.731  | 6.946 | 4.940  | 0.000 | 0.001 | 0.842 |
| Dapk1     | 1.632  | 6.164 | 4.939  | 0.000 | 0.001 | 0.839 |
| I12rg     | 2.564  | 4.944 | 4.938  | 0.000 | 0.001 | 0.837 |
| D6Wsu116c | 2.054  | 7.345 | 4.935  | 0.000 | 0.001 | 0.829 |
| Fam3b     | -4.359 | 6.156 | -4.933 | 0.000 | 0.001 | 0.826 |
| Pcmt1     | 1.675  | 6.352 | 4.933  | 0.000 | 0.001 | 0.826 |
| Kctd11    | 1.756  | 6.448 | 4.933  | 0.000 | 0.001 | 0.825 |
| Mib1      | 1.152  | 3.920 | 4.932  | 0.000 | 0.001 | 0.824 |
| Tes       | 2.473  | 8.985 | 4.930  | 0.000 | 0.001 | 0.818 |
| Cyld      | 1.437  | 5.638 | 4.928  | 0.000 | 0.001 | 0.813 |
| Hrh2      | -2.076 | 3.481 | -4.925 | 0.000 | 0.001 | 0.808 |
| Ube4b     | 1.738  | 6.165 | 4.925  | 0.000 | 0.001 | 0.807 |
| Wdr5      | 1.035  | 7.150 | 4.922  | 0.000 | 0.001 | 0.802 |
| Sema3g    | 1.025  | 3.401 | 4.922  | 0.000 | 0.001 | 0.802 |
| Ppm1h     | -1.246 | 3.955 | -4.922 | 0.000 | 0.001 | 0.801 |
| Lnx1      | -1.827 | 3.983 | -4.921 | 0.000 | 0.001 | 0.800 |
| Glt25d1   | 1.088  | 7.887 | 4.919  | 0.000 | 0.001 | 0.795 |
| Map4k5    | 1.396  | 3.921 | 4.915  | 0.000 | 0.001 | 0.786 |
| Tmem184a  | -2.688 | 6.233 | -4.915 | 0.000 | 0.001 | 0.786 |
| 6330577E1 | 1.853  | 9.634 | 4.910  | 0.000 | 0.001 | 0.774 |
| Eno3      | 1.925  | 5.509 | 4.908  | 0.000 | 0.001 | 0.770 |
| Acat1     | -1.500 | 6.937 | -4.907 | 0.000 | 0.001 | 0.768 |
| Nradd     | 2.196  | 5.853 | 4.905  | 0.000 | 0.001 | 0.762 |
| Bhlha9    | -1.165 | 3.422 | -4.905 | 0.000 | 0.001 | 0.762 |
| Agpat1    | -1.467 | 4.872 | -4.904 | 0.000 | 0.001 | 0.761 |
| Atxn10    | 2.118  | 9.774 | 4.903  | 0.000 | 0.001 | 0.759 |
| Gadd45a   | 2.139  | 8.159 | 4.902  | 0.000 | 0.001 | 0.757 |
| Snapin    | 1.825  | 8.221 | 4.898  | 0.000 | 0.001 | 0.747 |
| BB166591  | 1.214  | 5.578 | 4.896  | 0.000 | 0.001 | 0.743 |
| Shb       | 1.481  | 6.535 | 4.894  | 0.000 | 0.001 | 0.740 |
| Adh7      | -3.876 | 5.683 | -4.894 | 0.000 | 0.001 | 0.739 |

|           |        |        |        |       |       |       |
|-----------|--------|--------|--------|-------|-------|-------|
| Ftsjd1    | 1.090  | 4.061  | 4.893  | 0.000 | 0.001 | 0.737 |
| Numal     | 1.315  | 7.071  | 4.892  | 0.000 | 0.001 | 0.735 |
| Ptrh1     | 1.446  | 5.945  | 4.892  | 0.000 | 0.001 | 0.733 |
| Cnpy4     | 1.167  | 8.015  | 4.890  | 0.000 | 0.001 | 0.730 |
| Abcc9     | 1.742  | 3.499  | 4.890  | 0.000 | 0.001 | 0.730 |
| Clec4a2   | 1.905  | 4.193  | 4.890  | 0.000 | 0.001 | 0.730 |
| Litaf     | 2.345  | 9.384  | 4.888  | 0.000 | 0.001 | 0.726 |
| D17H6S56f | 2.734  | 8.760  | 4.888  | 0.000 | 0.001 | 0.725 |
| Dcaf12    | 1.552  | 6.147  | 4.887  | 0.000 | 0.001 | 0.723 |
| Chad      | -4.156 | 5.893  | -4.886 | 0.000 | 0.001 | 0.721 |
| Amn1      | 1.866  | 4.277  | 4.886  | 0.000 | 0.001 | 0.721 |
| Npc1      | 1.580  | 6.936  | 4.886  | 0.000 | 0.001 | 0.720 |
| Cyp26b1   | 1.747  | 4.306  | 4.883  | 0.000 | 0.001 | 0.714 |
| Tcfcp211  | -2.562 | 6.636  | -4.883 | 0.000 | 0.001 | 0.714 |
| Elf2      | 1.345  | 7.243  | 4.881  | 0.000 | 0.001 | 0.709 |
| Zfyve27   | 1.446  | 4.906  | 4.879  | 0.000 | 0.001 | 0.705 |
| Sgcb      | 1.005  | 4.474  | 4.878  | 0.000 | 0.001 | 0.704 |
| Nnmt      | 1.861  | 4.914  | 4.877  | 0.000 | 0.001 | 0.701 |
| Ube2g2    | 1.130  | 7.697  | 4.876  | 0.000 | 0.001 | 0.700 |
| Car9      | -1.898 | 8.304  | -4.876 | 0.000 | 0.001 | 0.699 |
| Hmcn1     | 1.232  | 4.041  | 4.873  | 0.000 | 0.001 | 0.692 |
| Zcchc11   | 1.424  | 6.394  | 4.872  | 0.000 | 0.001 | 0.690 |
| Ap1m1     | 1.378  | 6.382  | 4.871  | 0.000 | 0.001 | 0.687 |
| Stard10   | -1.756 | 10.302 | -4.869 | 0.000 | 0.001 | 0.684 |
| Iwsl      | 1.352  | 6.194  | 4.869  | 0.000 | 0.001 | 0.683 |
| Lrrc58    | 1.458  | 8.985  | 4.868  | 0.000 | 0.001 | 0.681 |
| Spopl     | 1.784  | 6.174  | 4.868  | 0.000 | 0.001 | 0.680 |
| Rps6ka3   | 1.598  | 6.981  | 4.864  | 0.000 | 0.001 | 0.672 |
| Gip       | -2.670 | 4.194  | -4.864 | 0.000 | 0.001 | 0.672 |
| Rhoj      | 2.583  | 7.487  | 4.861  | 0.000 | 0.001 | 0.666 |
| Fmcl      | -1.280 | 8.088  | -4.861 | 0.000 | 0.001 | 0.666 |
| Camsap111 | 1.683  | 8.058  | 4.860  | 0.000 | 0.001 | 0.662 |
| Rcn1      | 2.455  | 5.778  | 4.859  | 0.000 | 0.001 | 0.660 |
| H2-T18    | -1.184 | 3.626  | -4.858 | 0.000 | 0.001 | 0.660 |
| Mycn      | 2.302  | 5.000  | 4.858  | 0.000 | 0.001 | 0.659 |
| Rab27b    | -1.691 | 9.038  | -4.858 | 0.000 | 0.001 | 0.658 |
| Gca       | -1.671 | 5.133  | -4.856 | 0.000 | 0.001 | 0.655 |
| Apold1    | 1.303  | 4.289  | 4.854  | 0.000 | 0.001 | 0.649 |
| Wdfy3     | 1.973  | 6.157  | 4.851  | 0.000 | 0.001 | 0.643 |
| D830044I1 | -1.022 | 3.545  | -4.849 | 0.000 | 0.001 | 0.638 |
| Lztrl     | 1.015  | 6.330  | 4.849  | 0.000 | 0.001 | 0.638 |
| Tmem87b   | 1.349  | 5.658  | 4.848  | 0.000 | 0.001 | 0.638 |
| Crim1     | 1.215  | 7.603  | 4.845  | 0.000 | 0.001 | 0.630 |
| Il17re    | -2.142 | 7.745  | -4.843 | 0.000 | 0.001 | 0.625 |
| Ttr       | -3.711 | 7.310  | -4.843 | 0.000 | 0.001 | 0.624 |
| Dync1i2   | 1.189  | 8.987  | 4.842  | 0.000 | 0.001 | 0.623 |
| Zfp639    | 1.035  | 7.638  | 4.841  | 0.000 | 0.001 | 0.622 |
| 9530006Cz | 2.122  | 6.494  | 4.841  | 0.000 | 0.001 | 0.621 |
| P2ry13    | 1.139  | 4.280  | 4.840  | 0.000 | 0.001 | 0.619 |
| 5430411K1 | 1.003  | 5.828  | 4.840  | 0.000 | 0.001 | 0.618 |

|           |        |        |        |       |       |       |
|-----------|--------|--------|--------|-------|-------|-------|
| Otud1     | 1.275  | 4.947  | 4.838  | 0.000 | 0.001 | 0.614 |
| Rael      | 1.094  | 7.308  | 4.837  | 0.000 | 0.001 | 0.613 |
| Ubt2      | 1.652  | 6.440  | 4.837  | 0.000 | 0.001 | 0.612 |
| LOC100047 | -1.104 | 8.186  | -4.836 | 0.000 | 0.001 | 0.610 |
| Tppp      | -1.690 | 3.307  | -4.836 | 0.000 | 0.001 | 0.609 |
| Phf23     | 1.839  | 7.714  | 4.836  | 0.000 | 0.001 | 0.609 |
| Ifitm1    | 3.094  | 6.899  | 4.835  | 0.000 | 0.001 | 0.607 |
| 1600014C1 | 1.413  | 6.635  | 4.833  | 0.000 | 0.001 | 0.604 |
| Vamp1     | -1.003 | 3.465  | -4.829 | 0.000 | 0.001 | 0.595 |
| Mfsd2a    | -2.129 | 4.407  | -4.829 | 0.000 | 0.001 | 0.594 |
| Tb11x     | 1.170  | 7.620  | 4.828  | 0.000 | 0.001 | 0.591 |
| Calu      | 2.236  | 10.229 | 4.827  | 0.000 | 0.001 | 0.591 |
| Ccdc14    | 1.224  | 4.569  | 4.826  | 0.000 | 0.001 | 0.587 |
| Gm10693   | 1.221  | 4.156  | 4.825  | 0.000 | 0.001 | 0.586 |
| Fzd6      | 1.504  | 6.935  | 4.825  | 0.000 | 0.001 | 0.585 |
| Gm13337   | 1.930  | 7.792  | 4.824  | 0.000 | 0.001 | 0.582 |
| Ypel5     | 1.829  | 6.859  | 4.823  | 0.000 | 0.001 | 0.580 |
| Lin7c     | 1.278  | 5.917  | 4.822  | 0.000 | 0.001 | 0.579 |
| LOC100044 | 1.629  | 9.381  | 4.822  | 0.000 | 0.001 | 0.578 |
| Qser1     | 1.219  | 5.863  | 4.821  | 0.000 | 0.001 | 0.577 |
| Osbpl8    | 1.675  | 6.739  | 4.820  | 0.000 | 0.001 | 0.575 |
| Fbx12     | 1.135  | 3.409  | 4.819  | 0.000 | 0.001 | 0.573 |
| Nrarp     | 1.934  | 6.288  | 4.819  | 0.000 | 0.001 | 0.572 |
| Fam109a   | -1.046 | 5.212  | -4.818 | 0.000 | 0.001 | 0.570 |
| Cnot7     | 1.209  | 9.530  | 4.817  | 0.000 | 0.001 | 0.568 |
| Nmt2      | 1.893  | 5.320  | 4.816  | 0.000 | 0.001 | 0.566 |
| Mfsd1     | 1.344  | 7.010  | 4.816  | 0.000 | 0.001 | 0.565 |
| Slc4a3    | 1.254  | 4.878  | 4.814  | 0.000 | 0.001 | 0.561 |
| BC030336  | 2.126  | 6.439  | 4.808  | 0.000 | 0.001 | 0.548 |
| Cdc42ep2  | 1.551  | 5.924  | 4.808  | 0.000 | 0.001 | 0.546 |
| 803049702 | -1.069 | 3.408  | -4.806 | 0.000 | 0.001 | 0.543 |
| Ralb      | 1.557  | 7.814  | 4.804  | 0.000 | 0.001 | 0.539 |
| Dhx57     | 1.311  | 5.518  | 4.800  | 0.000 | 0.001 | 0.529 |
| Epha4     | 1.471  | 4.284  | 4.799  | 0.000 | 0.001 | 0.527 |
| 9430023L2 | 1.631  | 5.966  | 4.799  | 0.000 | 0.001 | 0.526 |
| Klf9      | 1.461  | 6.036  | 4.797  | 0.000 | 0.001 | 0.522 |
| Lrrc40    | 1.009  | 7.225  | 4.795  | 0.000 | 0.001 | 0.519 |
| Stk39     | -1.800 | 6.249  | -4.793 | 0.000 | 0.001 | 0.515 |
| Zfp9      | 1.778  | 5.630  | 4.793  | 0.000 | 0.001 | 0.514 |
| Phf20     | 1.747  | 7.101  | 4.788  | 0.000 | 0.001 | 0.504 |
| Pacs2     | 1.199  | 6.430  | 4.784  | 0.000 | 0.001 | 0.493 |
| Ubxn7     | 1.642  | 7.224  | 4.783  | 0.000 | 0.001 | 0.492 |
| Mt4       | -3.573 | 3.904  | -4.782 | 0.000 | 0.001 | 0.490 |
| Ddx42     | 1.010  | 6.320  | 4.782  | 0.000 | 0.001 | 0.489 |
| Cilp      | 2.482  | 5.213  | 4.781  | 0.000 | 0.001 | 0.488 |
| Cdk2ap1   | -1.030 | 3.189  | -4.781 | 0.000 | 0.001 | 0.487 |
| Cltc      | 1.363  | 6.162  | 4.780  | 0.000 | 0.001 | 0.485 |
| Gls       | 2.138  | 7.641  | 4.778  | 0.000 | 0.001 | 0.480 |
| Gm14137   | 1.701  | 4.955  | 4.776  | 0.000 | 0.001 | 0.476 |
| Hspb6     | 1.566  | 5.791  | 4.775  | 0.000 | 0.001 | 0.475 |



|           |        |        |        |       |       |       |
|-----------|--------|--------|--------|-------|-------|-------|
| Cish      | -1.284 | 6.859  | -4.775 | 0.000 | 0.001 | 0.474 |
| D11Wsu99e | 1.951  | 6.430  | 4.774  | 0.000 | 0.001 | 0.472 |
| Cptlc     | 1.907  | 5.107  | 4.774  | 0.000 | 0.001 | 0.471 |
| Sival     | 1.180  | 6.751  | 4.773  | 0.000 | 0.001 | 0.469 |
| 4930539E  | -2.543 | 4.683  | -4.773 | 0.000 | 0.001 | 0.468 |
| 2310051F  | 1.347  | 5.954  | 4.772  | 0.000 | 0.001 | 0.467 |
| 2310047M  | 1.505  | 6.205  | 4.772  | 0.000 | 0.001 | 0.467 |
| Pax6      | -1.309 | 3.084  | -4.771 | 0.000 | 0.001 | 0.465 |
| 5730458M  | 1.017  | 3.939  | 4.771  | 0.000 | 0.001 | 0.465 |
| Fert2     | -1.574 | 6.678  | -4.770 | 0.000 | 0.001 | 0.463 |
| Tbcd1     | 1.095  | 3.891  | 4.770  | 0.000 | 0.001 | 0.462 |
| Mccc1     | -1.467 | 7.809  | -4.770 | 0.000 | 0.001 | 0.462 |
| Tulp4     | 1.380  | 8.587  | 4.768  | 0.000 | 0.001 | 0.458 |
| Sumf1     | 1.696  | 6.713  | 4.768  | 0.000 | 0.001 | 0.457 |
| Acot10    | 2.071  | 8.469  | 4.768  | 0.000 | 0.001 | 0.457 |
| Fcgr1     | 2.363  | 4.909  | 4.767  | 0.000 | 0.001 | 0.455 |
| Ccny11    | 1.263  | 7.418  | 4.766  | 0.000 | 0.001 | 0.453 |
| Prrx1     | 1.921  | 4.722  | 4.764  | 0.000 | 0.001 | 0.449 |
| Rdh12     | -1.245 | 3.300  | -4.763 | 0.000 | 0.001 | 0.447 |
| 2810416G  | 1.234  | 3.704  | 4.759  | 0.000 | 0.001 | 0.438 |
| Pla2g2a   | -3.447 | 4.075  | -4.759 | 0.000 | 0.001 | 0.437 |
| Sor11     | -1.966 | 7.701  | -4.757 | 0.000 | 0.001 | 0.433 |
| Trove2    | 1.741  | 6.349  | 4.757  | 0.000 | 0.001 | 0.433 |
| Eif5a2    | 2.187  | 4.731  | 4.754  | 0.000 | 0.001 | 0.428 |
| Fer114    | -3.122 | 6.065  | -4.748 | 0.000 | 0.001 | 0.414 |
| Ralgps2   | 1.868  | 4.988  | 4.748  | 0.000 | 0.001 | 0.413 |
| Phf3      | 1.151  | 4.007  | 4.747  | 0.000 | 0.001 | 0.412 |
| Noc41     | 1.736  | 6.743  | 4.744  | 0.000 | 0.001 | 0.405 |
| Ccdc122   | 1.658  | 5.515  | 4.744  | 0.000 | 0.001 | 0.404 |
| 2900011L  | 1.733  | 5.898  | 4.743  | 0.000 | 0.001 | 0.403 |
| Uaca      | 1.192  | 5.773  | 4.742  | 0.000 | 0.001 | 0.400 |
| Cpne1     | 1.697  | 8.081  | 4.738  | 0.000 | 0.001 | 0.391 |
| Dusp3     | 1.059  | 4.181  | 4.736  | 0.000 | 0.001 | 0.386 |
| Npl       | 1.999  | 4.562  | 4.735  | 0.000 | 0.001 | 0.385 |
| Pstpip1   | 1.205  | 5.268  | 4.733  | 0.000 | 0.001 | 0.379 |
| AU018740  | 1.098  | 3.834  | 4.733  | 0.000 | 0.001 | 0.379 |
| Dhx36     | 1.579  | 6.931  | 4.732  | 0.000 | 0.001 | 0.378 |
| Tmem116   | -1.254 | 3.274  | -4.725 | 0.000 | 0.001 | 0.362 |
| 4833423F  | 2.169  | 6.034  | 4.724  | 0.000 | 0.001 | 0.359 |
| Scel      | 1.766  | 5.574  | 4.723  | 0.000 | 0.001 | 0.359 |
| Acssl     | -3.316 | 6.218  | -4.722 | 0.000 | 0.001 | 0.356 |
| Ubash3b   | 1.439  | 5.216  | 4.721  | 0.000 | 0.001 | 0.353 |
| Csrpl     | 2.265  | 7.685  | 4.721  | 0.000 | 0.001 | 0.352 |
| 5830443J  | 1.290  | 4.512  | 4.720  | 0.000 | 0.001 | 0.351 |
| Ptgr1     | -2.341 | 10.291 | -4.718 | 0.000 | 0.001 | 0.347 |
| Cst8      | -2.833 | 3.721  | -4.718 | 0.000 | 0.001 | 0.347 |
| Slc7a6    | 1.411  | 6.753  | 4.717  | 0.000 | 0.001 | 0.343 |
| Cnfn      | -1.319 | 3.122  | -4.716 | 0.000 | 0.001 | 0.343 |
| Tgfb1i1   | 1.258  | 5.894  | 4.716  | 0.000 | 0.001 | 0.343 |
| Cd86      | 1.125  | 3.880  | 4.715  | 0.000 | 0.001 | 0.340 |

|           |        |       |        |       |       |       |
|-----------|--------|-------|--------|-------|-------|-------|
| Uba6      | 1.536  | 6.974 | 4.713  | 0.000 | 0.001 | 0.336 |
| A130010C1 | 1.418  | 5.405 | 4.713  | 0.000 | 0.001 | 0.335 |
| 10-Sep    | 1.676  | 6.905 | 4.711  | 0.000 | 0.001 | 0.331 |
| Cxcl3     | 3.038  | 4.420 | 4.709  | 0.000 | 0.001 | 0.326 |
| Cd36      | -2.712 | 6.035 | -4.709 | 0.000 | 0.001 | 0.325 |
| Rrp1      | 1.711  | 7.203 | 4.707  | 0.000 | 0.001 | 0.322 |
| D17Ert16  | 1.028  | 4.788 | 4.706  | 0.000 | 0.001 | 0.321 |
| Zfp334    | 1.487  | 4.785 | 4.704  | 0.000 | 0.001 | 0.316 |
| Pcp411    | -2.494 | 4.443 | -4.704 | 0.000 | 0.001 | 0.315 |
| Unc80     | -1.026 | 3.176 | -4.704 | 0.000 | 0.001 | 0.314 |
| Lhfp15    | -1.091 | 3.518 | -4.698 | 0.000 | 0.001 | 0.302 |
| Sirt3     | -1.163 | 5.652 | -4.697 | 0.000 | 0.001 | 0.300 |
| Tmem97    | -1.729 | 6.784 | -4.695 | 0.000 | 0.001 | 0.294 |
| Aass      | -1.956 | 3.440 | -4.692 | 0.000 | 0.001 | 0.289 |
| Gpatch8   | 1.067  | 4.904 | 4.691  | 0.000 | 0.001 | 0.286 |
| Mial      | -2.590 | 4.709 | -4.690 | 0.000 | 0.001 | 0.283 |
| Zbtb4     | 1.480  | 7.822 | 4.689  | 0.000 | 0.001 | 0.282 |
| Ankrd44   | 1.941  | 6.057 | 4.687  | 0.000 | 0.001 | 0.277 |
| Mirlet7d  | 1.030  | 6.832 | 4.685  | 0.000 | 0.001 | 0.273 |
| Zcchc5    | -1.027 | 3.045 | -4.681 | 0.000 | 0.001 | 0.264 |
| Rab18     | 2.249  | 6.417 | 4.681  | 0.000 | 0.001 | 0.263 |
| E230012J1 | 1.070  | 5.545 | 4.679  | 0.000 | 0.001 | 0.258 |
| Plscr1    | 1.355  | 8.830 | 4.677  | 0.000 | 0.001 | 0.255 |
| Foxfla    | -1.415 | 4.035 | -4.677 | 0.000 | 0.001 | 0.255 |
| Ttpa      | -1.221 | 3.713 | -4.676 | 0.000 | 0.001 | 0.252 |
| Efs       | -1.037 | 3.959 | -4.674 | 0.000 | 0.001 | 0.249 |
| Ammecr1   | 1.185  | 6.305 | 4.673  | 0.000 | 0.001 | 0.246 |
| Insl3     | 1.159  | 5.646 | 4.672  | 0.000 | 0.001 | 0.244 |
| 9930105H1 | 1.771  | 7.655 | 4.672  | 0.000 | 0.001 | 0.243 |
| B230312A2 | 1.215  | 6.597 | 4.671  | 0.000 | 0.001 | 0.242 |
| D10Bwg13i | -3.204 | 5.939 | -4.669 | 0.000 | 0.001 | 0.237 |
| 9530067D1 | -1.258 | 3.785 | -4.668 | 0.000 | 0.001 | 0.234 |
| Ada       | 2.613  | 5.293 | 4.668  | 0.000 | 0.001 | 0.234 |
| Kpna4     | 1.814  | 8.424 | 4.666  | 0.000 | 0.001 | 0.230 |
| 5031439G  | 1.691  | 7.281 | 4.664  | 0.000 | 0.001 | 0.227 |
| Rasef     | -1.930 | 6.463 | -4.664 | 0.000 | 0.001 | 0.226 |
| Gar1      | 1.022  | 7.934 | 4.664  | 0.000 | 0.001 | 0.225 |
| Ctsc      | 2.825  | 9.888 | 4.663  | 0.000 | 0.001 | 0.223 |
| AA408296  | 1.238  | 6.232 | 4.662  | 0.000 | 0.001 | 0.222 |
| Galm      | -1.795 | 5.700 | -4.658 | 0.000 | 0.001 | 0.214 |
| BC015286  | -2.396 | 3.817 | -4.657 | 0.000 | 0.001 | 0.210 |
| Rapgef6   | 1.148  | 5.414 | 4.654  | 0.000 | 0.001 | 0.204 |
| Wip1      | 1.636  | 6.250 | 4.654  | 0.000 | 0.001 | 0.203 |
| Cxcl5     | 3.706  | 5.388 | 4.650  | 0.000 | 0.001 | 0.195 |
| Mbtps2    | 1.044  | 5.001 | 4.648  | 0.000 | 0.001 | 0.190 |
| Ptp4a2    | 1.453  | 7.500 | 4.647  | 0.000 | 0.001 | 0.188 |
| Bdnf      | 2.191  | 4.050 | 4.646  | 0.000 | 0.001 | 0.185 |
| Selm      | 1.825  | 7.553 | 4.646  | 0.000 | 0.001 | 0.185 |
| Col4a5    | 1.313  | 5.424 | 4.642  | 0.000 | 0.001 | 0.178 |
| Ggnbp1    | -1.599 | 3.322 | -4.642 | 0.000 | 0.001 | 0.177 |

|           |        |        |        |       |       |       |
|-----------|--------|--------|--------|-------|-------|-------|
| Tmem53    | 1.026  | 4.780  | 4.642  | 0.000 | 0.001 | 0.176 |
| Gm14326   | 1.080  | 5.541  | 4.639  | 0.000 | 0.001 | 0.170 |
| Tdrd3     | 1.198  | 5.603  | 4.639  | 0.000 | 0.001 | 0.170 |
| Adhl      | -4.610 | 7.530  | -4.639 | 0.000 | 0.001 | 0.169 |
| Qpct      | 1.855  | 4.440  | 4.638  | 0.000 | 0.001 | 0.167 |
| Oit1      | -3.681 | 7.057  | -4.634 | 0.000 | 0.001 | 0.159 |
| LOC100048 | 1.152  | 5.749  | 4.633  | 0.000 | 0.001 | 0.156 |
| D19Wsu162 | 2.012  | 7.237  | 4.632  | 0.000 | 0.001 | 0.155 |
| Gart      | 1.183  | 7.898  | 4.631  | 0.000 | 0.001 | 0.153 |
| Aip       | 1.152  | 6.410  | 4.631  | 0.000 | 0.001 | 0.152 |
| Gjal      | 2.934  | 7.186  | 4.631  | 0.000 | 0.001 | 0.152 |
| Tmem65    | 1.414  | 8.093  | 4.630  | 0.000 | 0.001 | 0.151 |
| Ddo       | -2.212 | 3.793  | -4.629 | 0.000 | 0.001 | 0.148 |
| Mcc       | 1.709  | 5.305  | 4.627  | 0.000 | 0.001 | 0.143 |
| Cno       | 1.016  | 6.278  | 4.625  | 0.000 | 0.001 | 0.139 |
| Tsc22d2   | 1.750  | 6.620  | 4.623  | 0.000 | 0.001 | 0.134 |
| Slc4a11   | 1.775  | 4.978  | 4.623  | 0.000 | 0.001 | 0.134 |
| Nbea      | 1.876  | 7.103  | 4.620  | 0.000 | 0.001 | 0.128 |
| Gdel      | -1.530 | 8.891  | -4.619 | 0.000 | 0.001 | 0.125 |
| Srrm4     | -1.029 | 3.070  | -4.619 | 0.000 | 0.001 | 0.125 |
| Ruvbl1    | 1.321  | 7.375  | 4.617  | 0.000 | 0.001 | 0.121 |
| Tmem42    | -1.531 | 7.029  | -4.615 | 0.000 | 0.001 | 0.117 |
| Pgf       | 2.255  | 5.190  | 4.614  | 0.000 | 0.001 | 0.113 |
| C78339    | 1.652  | 9.168  | 4.614  | 0.000 | 0.001 | 0.113 |
| Mboat4    | -1.534 | 3.366  | -4.613 | 0.000 | 0.001 | 0.112 |
| Gpt2      | -2.384 | 5.721  | -4.613 | 0.000 | 0.001 | 0.111 |
| Slc16a9   | -1.431 | 4.390  | -4.610 | 0.000 | 0.001 | 0.104 |
| 2010002NC | 1.736  | 7.433  | 4.608  | 0.000 | 0.001 | 0.101 |
| Mum1      | 1.151  | 6.481  | 4.608  | 0.000 | 0.001 | 0.101 |
| Chga      | -4.567 | 5.531  | -4.607 | 0.000 | 0.001 | 0.099 |
| Naprt1    | -1.932 | 6.304  | -4.606 | 0.000 | 0.001 | 0.096 |
| Slc6a18   | -1.009 | 3.119  | -4.605 | 0.000 | 0.001 | 0.095 |
| Tef       | 1.740  | 7.130  | 4.603  | 0.000 | 0.002 | 0.090 |
| Nkx6-3    | -4.144 | 4.941  | -4.602 | 0.000 | 0.002 | 0.088 |
| Bnip31    | 1.205  | 9.944  | 4.602  | 0.000 | 0.002 | 0.086 |
| Srgap3    | 1.820  | 6.467  | 4.600  | 0.000 | 0.002 | 0.084 |
| Clec4a3   | 2.127  | 4.542  | 4.600  | 0.000 | 0.002 | 0.083 |
| Myc       | 1.365  | 8.391  | 4.600  | 0.000 | 0.002 | 0.082 |
| Nr1i2     | -1.138 | 3.339  | -4.600 | 0.000 | 0.002 | 0.082 |
| Klh130    | 1.947  | 4.055  | 4.599  | 0.000 | 0.002 | 0.081 |
| Fam53c    | 1.357  | 7.393  | 4.599  | 0.000 | 0.002 | 0.080 |
| Ccl2      | 2.040  | 5.130  | 4.597  | 0.000 | 0.002 | 0.075 |
| Nup93     | 1.245  | 7.488  | 4.596  | 0.000 | 0.002 | 0.074 |
| Ovol2     | -2.021 | 4.892  | -4.595 | 0.000 | 0.002 | 0.072 |
| Rcn2      | 2.066  | 8.395  | 4.595  | 0.000 | 0.002 | 0.071 |
| Aloxe3    | -1.220 | 3.614  | -4.594 | 0.000 | 0.002 | 0.070 |
| Tmem203   | 1.185  | 6.075  | 4.594  | 0.000 | 0.002 | 0.069 |
| Errfil    | 2.369  | 9.728  | 4.593  | 0.000 | 0.002 | 0.066 |
| Sdc4      | 1.252  | 10.143 | 4.590  | 0.000 | 0.002 | 0.061 |
| Cpeb3     | -1.435 | 4.257  | -4.590 | 0.000 | 0.002 | 0.060 |

|           |        |        |        |       |       |        |
|-----------|--------|--------|--------|-------|-------|--------|
| Klra1     | 1.754  | 3.784  | 4.589  | 0.000 | 0.002 | 0.057  |
| Pecam1    | 1.399  | 4.799  | 4.589  | 0.000 | 0.002 | 0.057  |
| Arrdc3    | 1.720  | 7.337  | 4.588  | 0.000 | 0.002 | 0.057  |
| Dync2h1   | 1.025  | 5.025  | 4.586  | 0.000 | 0.002 | 0.052  |
| Aspa      | 2.270  | 6.733  | 4.586  | 0.000 | 0.002 | 0.052  |
| Acs14     | 2.165  | 6.061  | 4.586  | 0.000 | 0.002 | 0.051  |
| Aars      | 1.564  | 7.244  | 4.585  | 0.000 | 0.002 | 0.050  |
| Snapc1    | 1.380  | 6.561  | 4.585  | 0.000 | 0.002 | 0.049  |
| Krt85     | -1.103 | 3.499  | -4.584 | 0.000 | 0.002 | 0.046  |
| Pnlip     | -2.713 | 4.067  | -4.582 | 0.000 | 0.002 | 0.043  |
| Npnt      | 2.033  | 4.609  | 4.581  | 0.000 | 0.002 | 0.041  |
| Mpg       | 1.400  | 6.763  | 4.581  | 0.000 | 0.002 | 0.040  |
| Slc25a34  | -1.812 | 3.899  | -4.581 | 0.000 | 0.002 | 0.039  |
| Pacrg1    | 1.089  | 5.248  | 4.580  | 0.000 | 0.002 | 0.038  |
| BC094435  | 1.337  | 11.681 | 4.576  | 0.000 | 0.002 | 0.030  |
| Anp32e    | 1.525  | 8.405  | 4.575  | 0.000 | 0.002 | 0.028  |
| Fam43b    | -1.002 | 3.215  | -4.573 | 0.000 | 0.002 | 0.022  |
| LOC100045 | -2.705 | 5.202  | -4.572 | 0.000 | 0.002 | 0.021  |
| Prdm8     | 1.180  | 3.496  | 4.571  | 0.000 | 0.002 | 0.019  |
| Lgals3    | 3.215  | 10.695 | 4.570  | 0.000 | 0.002 | 0.015  |
| Birc3     | 1.531  | 7.854  | 4.566  | 0.000 | 0.002 | 0.008  |
| Arhgdib   | 2.207  | 7.175  | 4.566  | 0.000 | 0.002 | 0.006  |
| Fbxo6     | 1.135  | 7.191  | 4.565  | 0.000 | 0.002 | 0.004  |
| Nap111    | 1.906  | 7.246  | 4.563  | 0.000 | 0.002 | 0.000  |
| Crygb     | -1.164 | 3.400  | -4.561 | 0.000 | 0.002 | -0.004 |
| 2310010G2 | 1.101  | 4.458  | 4.561  | 0.000 | 0.002 | -0.005 |
| D930017J0 | 1.337  | 3.570  | 4.561  | 0.000 | 0.002 | -0.005 |
| 1600002K0 | -1.416 | 5.106  | -4.560 | 0.000 | 0.002 | -0.006 |
| Pnma12    | -1.032 | 3.775  | -4.560 | 0.000 | 0.002 | -0.007 |
| Alcam     | 1.316  | 9.607  | 4.559  | 0.000 | 0.002 | -0.009 |
| Oaf       | 1.757  | 7.570  | 4.559  | 0.000 | 0.002 | -0.009 |
| Pllp      | -2.856 | 8.076  | -4.558 | 0.000 | 0.002 | -0.010 |
| Anxa3     | 3.294  | 10.712 | 4.558  | 0.000 | 0.002 | -0.012 |
| Mxil      | 1.459  | 5.193  | 4.558  | 0.000 | 0.002 | -0.012 |
| Gnb5      | 1.176  | 5.455  | 4.557  | 0.000 | 0.002 | -0.013 |
| Ms4a6b    | 2.891  | 6.587  | 4.557  | 0.000 | 0.002 | -0.015 |
| Unc13d    | 1.300  | 4.769  | 4.555  | 0.000 | 0.002 | -0.019 |
| LOC106740 | 1.195  | 4.705  | 4.555  | 0.000 | 0.002 | -0.019 |
| Cdk13     | 1.595  | 5.490  | 4.554  | 0.000 | 0.002 | -0.020 |
| Slc44a3   | -2.668 | 7.282  | -4.553 | 0.000 | 0.002 | -0.023 |
| Nrbp1     | 1.536  | 6.970  | 4.552  | 0.000 | 0.002 | -0.024 |
| Chmp1a    | 1.305  | 8.498  | 4.552  | 0.000 | 0.002 | -0.025 |
| Zc3h6     | 1.547  | 4.432  | 4.551  | 0.000 | 0.002 | -0.026 |
| 2510009E0 | 1.057  | 6.013  | 4.549  | 0.000 | 0.002 | -0.031 |
| Bat3      | 1.494  | 6.909  | 4.548  | 0.000 | 0.002 | -0.033 |
| Parn      | 1.368  | 5.898  | 4.546  | 0.000 | 0.002 | -0.038 |
| Gm5571    | -1.333 | 3.119  | -4.545 | 0.000 | 0.002 | -0.041 |
| Tcp11     | -1.021 | 3.857  | -4.544 | 0.000 | 0.002 | -0.042 |
| Serpina9  | 1.801  | 4.474  | 4.542  | 0.000 | 0.002 | -0.048 |
| Myo10     | 1.199  | 6.773  | 4.542  | 0.000 | 0.002 | -0.048 |

|           |        |       |        |       |       |        |
|-----------|--------|-------|--------|-------|-------|--------|
| Jakmip1   | -1.076 | 2.983 | -4.539 | 0.000 | 0.002 | -0.053 |
| Sprr3     | -2.078 | 3.749 | -4.539 | 0.000 | 0.002 | -0.055 |
| Slc36a4   | 1.542  | 6.559 | 4.538  | 0.000 | 0.002 | -0.056 |
| Tmem50b   | -1.287 | 8.579 | -4.538 | 0.000 | 0.002 | -0.057 |
| Mettl11a  | 1.214  | 6.764 | 4.537  | 0.000 | 0.002 | -0.058 |
| Cxxc4     | -1.621 | 4.585 | -4.537 | 0.000 | 0.002 | -0.058 |
| C730026J1 | 1.121  | 6.988 | 4.537  | 0.000 | 0.002 | -0.059 |
| Lyl1      | 1.067  | 4.773 | 4.536  | 0.000 | 0.002 | -0.060 |
| Ifi47     | 2.373  | 6.180 | 4.536  | 0.000 | 0.002 | -0.061 |
| Plekhol   | 1.607  | 5.692 | 4.535  | 0.000 | 0.002 | -0.063 |
| Anpep     | -2.157 | 4.509 | -4.534 | 0.000 | 0.002 | -0.066 |
| Lass4     | -2.436 | 5.341 | -4.533 | 0.000 | 0.002 | -0.067 |
| Rhod      | 1.269  | 5.902 | 4.533  | 0.000 | 0.002 | -0.068 |
| Me3       | -1.834 | 3.594 | -4.530 | 0.000 | 0.002 | -0.075 |
| Tmem14c   | -1.032 | 9.654 | -4.529 | 0.000 | 0.002 | -0.077 |
| Sdk2      | -2.027 | 4.464 | -4.528 | 0.000 | 0.002 | -0.077 |
| Gsta2     | -3.449 | 4.864 | -4.527 | 0.000 | 0.002 | -0.080 |
| Arid4a    | 1.144  | 5.417 | 4.527  | 0.000 | 0.002 | -0.080 |
| Fxyd1     | 1.523  | 5.123 | 4.526  | 0.000 | 0.002 | -0.082 |
| Ccdc109b  | 2.113  | 6.236 | 4.526  | 0.000 | 0.002 | -0.083 |
| Gale      | -1.789 | 7.240 | -4.525 | 0.000 | 0.002 | -0.086 |
| Cdkn2a    | 4.352  | 5.700 | 4.524  | 0.000 | 0.002 | -0.088 |
| Ppmlm     | 1.058  | 6.568 | 4.522  | 0.000 | 0.002 | -0.091 |
| Tuscl     | 1.353  | 6.313 | 4.522  | 0.000 | 0.002 | -0.092 |
| Isyl      | 1.026  | 5.733 | 4.518  | 0.000 | 0.002 | -0.100 |
| 2310021P1 | 1.097  | 7.015 | 4.514  | 0.000 | 0.002 | -0.110 |
| Ppmlj     | 1.281  | 4.453 | 4.511  | 0.000 | 0.002 | -0.117 |
| Ednrb     | 1.523  | 4.281 | 4.508  | 0.000 | 0.002 | -0.123 |
| Mgmt      | -1.106 | 4.616 | -4.508 | 0.000 | 0.002 | -0.123 |
| Rbm8a     | 1.029  | 9.143 | 4.508  | 0.000 | 0.002 | -0.123 |
| Calml3    | -1.848 | 3.320 | -4.507 | 0.000 | 0.002 | -0.126 |
| Kdm4a     | 1.066  | 6.347 | 4.507  | 0.000 | 0.002 | -0.126 |
| Cep192    | 1.605  | 6.456 | 4.506  | 0.000 | 0.002 | -0.127 |
| Acadsb    | -1.621 | 7.891 | -4.506 | 0.000 | 0.002 | -0.127 |
| Renbp     | 1.603  | 4.964 | 4.505  | 0.000 | 0.002 | -0.131 |
| Cited2    | 1.386  | 5.393 | 4.502  | 0.000 | 0.002 | -0.137 |
| Trex1     | 1.180  | 5.717 | 4.502  | 0.000 | 0.002 | -0.137 |
| Ptpn18    | -1.008 | 7.459 | -4.502 | 0.000 | 0.002 | -0.137 |
| Smarca2   | 1.635  | 6.253 | 4.502  | 0.000 | 0.002 | -0.137 |
| Sdc3      | -1.128 | 4.966 | -4.502 | 0.000 | 0.002 | -0.137 |
| Tcf19     | -1.505 | 7.363 | -4.502 | 0.000 | 0.002 | -0.137 |
| Clock     | 1.082  | 7.259 | 4.497  | 0.000 | 0.002 | -0.149 |
| Pcnx      | 1.366  | 5.783 | 4.496  | 0.000 | 0.002 | -0.150 |
| Zglp1     | -1.030 | 3.903 | -4.496 | 0.000 | 0.002 | -0.151 |
| Mybbp1a   | 1.405  | 5.861 | 4.495  | 0.000 | 0.002 | -0.153 |
| Fam76b    | 1.134  | 8.267 | 4.494  | 0.000 | 0.002 | -0.154 |
| Depdc7    | 1.537  | 6.283 | 4.492  | 0.000 | 0.002 | -0.160 |
| Arhgef4   | -1.625 | 4.470 | -4.491 | 0.000 | 0.002 | -0.161 |
| Lgals8    | 1.417  | 4.832 | 4.491  | 0.000 | 0.002 | -0.162 |
| Nipal2    | -3.079 | 6.932 | -4.490 | 0.000 | 0.002 | -0.163 |

|            |        |        |        |       |       |        |
|------------|--------|--------|--------|-------|-------|--------|
| Aqr        | -1.198 | 3.857  | -4.488 | 0.000 | 0.002 | -0.168 |
| Cenpc1     | 1.256  | 6.996  | 4.488  | 0.000 | 0.002 | -0.168 |
| Tk2        | 1.204  | 5.842  | 4.487  | 0.000 | 0.002 | -0.171 |
| Igfbp6     | 1.891  | 4.741  | 4.487  | 0.000 | 0.002 | -0.171 |
| Pld6       | -1.925 | 3.655  | -4.486 | 0.000 | 0.002 | -0.173 |
| Zbed6      | 1.199  | 4.725  | 4.485  | 0.000 | 0.002 | -0.174 |
| I110017F1  | -2.559 | 7.845  | -4.483 | 0.000 | 0.002 | -0.180 |
| Gm94       | -2.598 | 3.514  | -4.483 | 0.000 | 0.002 | -0.180 |
| Ptplb      | 1.297  | 4.141  | 4.482  | 0.000 | 0.002 | -0.181 |
| BC016423   | 1.872  | 6.566  | 4.482  | 0.000 | 0.002 | -0.182 |
| 2410002F2  | 1.042  | 7.122  | 4.481  | 0.000 | 0.002 | -0.184 |
| Ndufa12    | -1.162 | 9.705  | -4.480 | 0.000 | 0.002 | -0.187 |
| D4Ertd76e  | 1.011  | 4.701  | 4.478  | 0.000 | 0.002 | -0.190 |
| Apoc4      | 1.676  | 4.445  | 4.478  | 0.000 | 0.002 | -0.191 |
| Fam119a    | -1.057 | 5.925  | -4.476 | 0.000 | 0.002 | -0.195 |
| Rasd1      | -1.731 | 3.939  | -4.474 | 0.000 | 0.002 | -0.199 |
| Myef2      | 1.460  | 4.633  | 4.473  | 0.000 | 0.002 | -0.202 |
| S100a11    | 1.481  | 12.101 | 4.471  | 0.000 | 0.002 | -0.206 |
| Chdh       | -3.442 | 6.735  | -4.466 | 0.000 | 0.002 | -0.216 |
| Isg2012    | 1.701  | 7.345  | 4.466  | 0.000 | 0.002 | -0.217 |
| Psm2       | 1.081  | 9.281  | 4.461  | 0.000 | 0.002 | -0.229 |
| Gpr155     | -2.904 | 5.774  | -4.460 | 0.000 | 0.002 | -0.230 |
| Scara3     | 2.588  | 9.043  | 4.459  | 0.000 | 0.002 | -0.234 |
| Smcr8      | 1.113  | 5.643  | 4.458  | 0.000 | 0.002 | -0.235 |
| B130021B1  | 3.047  | 5.195  | 4.458  | 0.000 | 0.002 | -0.235 |
| Tnfaip8    | 2.033  | 8.029  | 4.456  | 0.000 | 0.002 | -0.240 |
| Tmem2      | 1.414  | 6.660  | 4.454  | 0.000 | 0.002 | -0.244 |
| I110019D1  | -1.037 | 3.731  | -4.454 | 0.000 | 0.002 | -0.244 |
| Gzme       | 2.970  | 4.352  | 4.454  | 0.000 | 0.002 | -0.245 |
| Gadd45g    | -1.480 | 7.979  | -4.450 | 0.000 | 0.002 | -0.253 |
| Farp2      | -1.116 | 4.373  | -4.448 | 0.000 | 0.002 | -0.258 |
| Bnip3      | 2.705  | 9.762  | 4.445  | 0.000 | 0.002 | -0.265 |
| Ypel1      | 1.487  | 3.969  | 4.444  | 0.000 | 0.002 | -0.266 |
| Tnn        | -1.242 | 3.760  | -4.443 | 0.000 | 0.002 | -0.269 |
| Bcl2l13    | 1.033  | 6.296  | 4.440  | 0.000 | 0.002 | -0.275 |
| Anxa9      | 1.411  | 4.109  | 4.439  | 0.000 | 0.002 | -0.277 |
| 2210411K1  | -1.728 | 8.408  | -4.438 | 0.000 | 0.002 | -0.281 |
| 2010107G2  | -1.528 | 6.495  | -4.437 | 0.000 | 0.002 | -0.282 |
| Gt (ROSA)2 | 2.758  | 7.068  | 4.436  | 0.000 | 0.002 | -0.284 |
| Echdc2     | -1.529 | 5.924  | -4.436 | 0.000 | 0.002 | -0.286 |
| 6430706D2  | 1.551  | 7.135  | 4.435  | 0.000 | 0.002 | -0.287 |
| Tubgcp2    | 1.631  | 6.280  | 4.434  | 0.000 | 0.002 | -0.289 |
| Lrrk2      | 1.577  | 4.446  | 4.432  | 0.000 | 0.002 | -0.294 |
| Krt79      | -1.720 | 4.459  | -4.432 | 0.000 | 0.002 | -0.295 |
| Trib3      | 1.524  | 4.743  | 4.431  | 0.000 | 0.002 | -0.297 |
| Cenpb      | 1.449  | 6.358  | 4.430  | 0.000 | 0.002 | -0.299 |
| Kif5c      | 1.616  | 5.595  | 4.430  | 0.000 | 0.002 | -0.299 |
| Itgam      | 2.168  | 4.498  | 4.428  | 0.000 | 0.002 | -0.302 |
| Ube2k      | 1.293  | 9.837  | 4.427  | 0.000 | 0.002 | -0.305 |
| Hbp1       | 1.787  | 5.702  | 4.427  | 0.000 | 0.002 | -0.305 |

|           |        |       |        |       |       |        |
|-----------|--------|-------|--------|-------|-------|--------|
| Cyp2s1    | -3.338 | 7.692 | -4.427 | 0.000 | 0.002 | -0.306 |
| Tnfrsf22  | 1.520  | 4.187 | 4.425  | 0.000 | 0.002 | -0.309 |
| Wasl      | 1.025  | 9.507 | 4.425  | 0.000 | 0.002 | -0.310 |
| Moxd1     | 2.434  | 4.906 | 4.422  | 0.000 | 0.002 | -0.316 |
| Col16a1   | 1.537  | 5.595 | 4.419  | 0.000 | 0.002 | -0.323 |
| Nfkbie    | 1.295  | 4.207 | 4.419  | 0.000 | 0.002 | -0.323 |
| Sfxn3     | 1.436  | 7.512 | 4.419  | 0.000 | 0.002 | -0.324 |
| Mtf2      | 1.494  | 7.316 | 4.418  | 0.000 | 0.002 | -0.324 |
| Fam57a    | -1.604 | 7.308 | -4.417 | 0.000 | 0.002 | -0.327 |
| LOC100046 | 1.475  | 7.326 | 4.416  | 0.000 | 0.002 | -0.331 |
| 5930427L  | -1.844 | 6.066 | -4.415 | 0.000 | 0.002 | -0.332 |
| Plekha3   | 1.712  | 5.940 | 4.414  | 0.000 | 0.002 | -0.335 |
| Prss8     | -2.745 | 6.401 | -4.412 | 0.000 | 0.002 | -0.338 |
| Ppplr8    | 1.127  | 6.476 | 4.411  | 0.000 | 0.002 | -0.340 |
| Aarsd1    | -1.007 | 6.040 | -4.409 | 0.000 | 0.002 | -0.345 |
| Clk2      | 1.259  | 7.314 | 4.408  | 0.000 | 0.002 | -0.347 |
| Sh2d4a    | -2.167 | 7.532 | -4.408 | 0.000 | 0.002 | -0.348 |
| Hsd11b2   | -1.322 | 3.930 | -4.407 | 0.000 | 0.002 | -0.350 |
| LOC100047 | -1.462 | 5.344 | -4.406 | 0.000 | 0.002 | -0.352 |
| Slc23a3   | -1.579 | 3.391 | -4.405 | 0.000 | 0.002 | -0.354 |
| Erc1      | 1.339  | 5.725 | 4.403  | 0.000 | 0.002 | -0.359 |
| Mphosph9  | 1.110  | 6.027 | 4.400  | 0.000 | 0.002 | -0.365 |
| Hs3st1    | 1.915  | 7.222 | 4.398  | 0.000 | 0.002 | -0.371 |
| LOC62536  | -1.093 | 2.888 | -4.395 | 0.000 | 0.002 | -0.377 |
| Tmed6     | -4.082 | 6.226 | -4.395 | 0.000 | 0.002 | -0.377 |
| Cep152    | 1.043  | 5.436 | 4.394  | 0.000 | 0.002 | -0.378 |
| Pde4dip   | 2.401  | 5.119 | 4.393  | 0.000 | 0.002 | -0.381 |
| D530037H1 | 1.379  | 5.995 | 4.393  | 0.000 | 0.002 | -0.382 |
| D330022H1 | 1.108  | 4.004 | 4.392  | 0.000 | 0.002 | -0.384 |
| Gstal     | -4.671 | 9.039 | -4.390 | 0.000 | 0.002 | -0.388 |
| Bivm      | 1.129  | 6.585 | 4.387  | 0.000 | 0.002 | -0.395 |
| Uqcrc1    | -1.204 | 9.643 | -4.387 | 0.000 | 0.002 | -0.395 |
| Zfp704    | 1.457  | 5.890 | 4.387  | 0.000 | 0.002 | -0.395 |
| Ptch1     | 1.851  | 7.209 | 4.386  | 0.000 | 0.002 | -0.398 |
| 2210011C2 | -1.835 | 3.656 | -4.384 | 0.000 | 0.002 | -0.400 |
| Aim2      | 2.171  | 4.393 | 4.383  | 0.000 | 0.002 | -0.404 |
| Clec4a2   | 1.689  | 4.876 | 4.383  | 0.000 | 0.002 | -0.404 |
| Bcas2     | 1.058  | 8.232 | 4.383  | 0.000 | 0.002 | -0.405 |
| Aldh1a7   | -3.467 | 6.323 | -4.382 | 0.000 | 0.002 | -0.405 |
| Irf5      | 1.072  | 4.988 | 4.382  | 0.000 | 0.002 | -0.405 |
| Ppbp      | 2.034  | 5.182 | 4.381  | 0.000 | 0.002 | -0.407 |
| Fam73a    | 1.635  | 4.922 | 4.381  | 0.000 | 0.002 | -0.409 |
| Iffo2     | 1.422  | 6.516 | 4.380  | 0.000 | 0.002 | -0.411 |
| Itgb5     | 1.645  | 8.976 | 4.379  | 0.000 | 0.002 | -0.412 |
| Cull1     | 1.154  | 8.722 | 4.379  | 0.000 | 0.002 | -0.412 |
| Gm13648   | -2.318 | 6.807 | -4.377 | 0.000 | 0.002 | -0.416 |
| Prpf39    | 1.806  | 6.647 | 4.377  | 0.000 | 0.002 | -0.418 |
| Fat1      | 2.485  | 9.873 | 4.376  | 0.000 | 0.002 | -0.420 |
| Pes1      | 1.033  | 7.736 | 4.375  | 0.000 | 0.002 | -0.422 |
| Tmprss13  | -1.194 | 3.212 | -4.375 | 0.000 | 0.002 | -0.422 |

|           |        |        |        |       |       |        |
|-----------|--------|--------|--------|-------|-------|--------|
| Ptger2    | 1.393  | 3.661  | 4.375  | 0.000 | 0.002 | -0.423 |
| Mmp13     | 3.227  | 4.928  | 4.374  | 0.000 | 0.002 | -0.423 |
| Per2      | 1.455  | 5.043  | 4.374  | 0.000 | 0.002 | -0.424 |
| Lypd6b    | -3.147 | 5.698  | -4.373 | 0.000 | 0.002 | -0.425 |
| Ncl       | 1.288  | 10.260 | 4.370  | 0.000 | 0.002 | -0.432 |
| Syng3     | -1.036 | 3.831  | -4.368 | 0.000 | 0.002 | -0.436 |
| 6720468P1 | -1.269 | 3.450  | -4.367 | 0.000 | 0.002 | -0.439 |
| Cdc42ep3  | 1.102  | 4.757  | 4.366  | 0.000 | 0.002 | -0.442 |
| Krt1      | -1.632 | 3.931  | -4.365 | 0.000 | 0.002 | -0.443 |
| Ces3      | -2.135 | 3.651  | -4.364 | 0.000 | 0.002 | -0.446 |
| Spin1     | 1.682  | 9.003  | 4.363  | 0.000 | 0.002 | -0.448 |
| Nfkb1     | 1.273  | 8.090  | 4.360  | 0.000 | 0.002 | -0.454 |
| Mtmr4     | 1.498  | 5.078  | 4.359  | 0.000 | 0.002 | -0.457 |
| Aplp1     | -1.073 | 3.448  | -4.358 | 0.000 | 0.002 | -0.460 |
| Tmem139   | -2.116 | 5.361  | -4.358 | 0.000 | 0.002 | -0.460 |
| LOC100046 | 1.922  | 7.483  | 4.357  | 0.000 | 0.002 | -0.463 |
| Trrap     | 1.006  | 7.481  | 4.357  | 0.000 | 0.002 | -0.463 |
| Idh2      | -1.125 | 8.856  | -4.356 | 0.000 | 0.002 | -0.464 |
| Tmsb10    | 1.227  | 10.368 | 4.354  | 0.000 | 0.002 | -0.469 |
| D030002E6 | 1.433  | 5.520  | 4.352  | 0.000 | 0.002 | -0.473 |
| Ifnar2    | 1.191  | 5.109  | 4.352  | 0.000 | 0.002 | -0.474 |
| LOC100047 | 1.037  | 5.729  | 4.349  | 0.000 | 0.002 | -0.479 |
| Krt7      | 2.587  | 10.255 | 4.349  | 0.000 | 0.002 | -0.480 |
| Sema3c    | 1.348  | 6.655  | 4.346  | 0.000 | 0.002 | -0.487 |
| Dbt       | -1.509 | 7.472  | -4.343 | 0.000 | 0.002 | -0.494 |
| Ppp4r2    | 1.530  | 9.750  | 4.342  | 0.000 | 0.002 | -0.496 |
| Haus2     | 1.657  | 5.815  | 4.341  | 0.000 | 0.002 | -0.497 |
| Cadm1     | 1.969  | 8.048  | 4.341  | 0.000 | 0.002 | -0.498 |
| Sox15     | -1.214 | 3.477  | -4.341 | 0.000 | 0.002 | -0.499 |
| Parp3     | 1.128  | 7.535  | 4.341  | 0.000 | 0.002 | -0.499 |
| Enpp1     | 1.346  | 7.601  | 4.339  | 0.000 | 0.002 | -0.503 |
| Bhlhe40   | 1.867  | 9.549  | 4.338  | 0.000 | 0.002 | -0.505 |
| Kcne4     | 1.534  | 4.806  | 4.336  | 0.000 | 0.002 | -0.508 |
| P2rx7     | 1.711  | 4.018  | 4.336  | 0.000 | 0.002 | -0.510 |
| Idh3a     | -1.673 | 5.908  | -4.335 | 0.000 | 0.002 | -0.512 |
| Aktip     | 1.395  | 7.122  | 4.333  | 0.000 | 0.002 | -0.516 |
| Vcl       | 2.009  | 9.362  | 4.330  | 0.000 | 0.002 | -0.523 |
| 0610012H6 | -1.348 | 2.932  | -4.324 | 0.000 | 0.002 | -0.535 |
| Bok       | 1.579  | 8.170  | 4.324  | 0.000 | 0.002 | -0.536 |
| Pla2g10   | -4.266 | 5.963  | -4.323 | 0.000 | 0.002 | -0.538 |
| Psip1     | 1.910  | 6.276  | 4.322  | 0.000 | 0.002 | -0.541 |
| Klf6      | 2.049  | 8.142  | 4.321  | 0.000 | 0.002 | -0.542 |
| Tor1aip1  | 1.585  | 7.416  | 4.321  | 0.000 | 0.002 | -0.544 |
| Phlpp1    | 1.010  | 6.836  | 4.319  | 0.000 | 0.002 | -0.547 |
| Rbm47     | -1.418 | 7.250  | -4.319 | 0.000 | 0.002 | -0.548 |
| Gm2a      | 2.660  | 5.293  | 4.318  | 0.000 | 0.002 | -0.550 |
| Cpt2      | -1.269 | 8.200  | -4.316 | 0.000 | 0.002 | -0.554 |
| Zdhhc18   | 1.162  | 6.901  | 4.316  | 0.000 | 0.002 | -0.554 |
| Bco2      | -1.433 | 4.840  | -4.314 | 0.000 | 0.002 | -0.557 |
| Mapre1    | 1.816  | 8.608  | 4.311  | 0.000 | 0.002 | -0.564 |



|           |        |       |        |       |       |        |
|-----------|--------|-------|--------|-------|-------|--------|
| Irf2bp2   | 1.759  | 7.749 | 4.311  | 0.000 | 0.002 | -0.566 |
| Sgms2     | 2.504  | 8.976 | 4.307  | 0.000 | 0.002 | -0.575 |
| Fam46c    | -1.975 | 4.199 | -4.306 | 0.000 | 0.002 | -0.575 |
| Cyp2d26   | -2.183 | 4.471 | -4.306 | 0.000 | 0.002 | -0.577 |
| P4ha1     | 1.870  | 4.298 | 4.305  | 0.000 | 0.002 | -0.580 |
| Dullard   | 1.165  | 6.948 | 4.302  | 0.000 | 0.002 | -0.585 |
| Tcf23     | -3.034 | 4.896 | -4.302 | 0.000 | 0.002 | -0.585 |
| Rps25     | 1.652  | 7.374 | 4.301  | 0.000 | 0.002 | -0.588 |
| 9330112Fz | 1.060  | 4.711 | 4.300  | 0.000 | 0.003 | -0.591 |
| Gngt1     | -1.113 | 3.229 | -4.299 | 0.000 | 0.003 | -0.592 |
| Wdr81     | 1.238  | 6.209 | 4.296  | 0.000 | 0.003 | -0.599 |
| Voppl     | 1.755  | 7.395 | 4.296  | 0.000 | 0.003 | -0.600 |
| Micalc1   | -1.408 | 3.802 | -4.295 | 0.000 | 0.003 | -0.600 |
| Rab19     | -1.312 | 5.166 | -4.293 | 0.000 | 0.003 | -0.606 |
| Mtmr2     | 1.199  | 5.800 | 4.292  | 0.000 | 0.003 | -0.607 |
| 2410042Dz | 1.148  | 7.027 | 4.290  | 0.000 | 0.003 | -0.612 |
| Acat2     | -1.247 | 9.134 | -4.289 | 0.000 | 0.003 | -0.614 |
| Jarid2    | 1.111  | 5.963 | 4.289  | 0.000 | 0.003 | -0.614 |
| Fbxo11    | 1.597  | 7.440 | 4.288  | 0.000 | 0.003 | -0.616 |
| 4933433P1 | 1.006  | 6.981 | 4.288  | 0.000 | 0.003 | -0.617 |
| 1700001K1 | -1.054 | 3.258 | -4.287 | 0.000 | 0.003 | -0.618 |
| Angpt2    | 1.485  | 4.941 | 4.284  | 0.000 | 0.003 | -0.625 |
| Tmem159   | 1.603  | 6.120 | 4.284  | 0.000 | 0.003 | -0.625 |
| Rad18     | 1.298  | 4.591 | 4.284  | 0.000 | 0.003 | -0.627 |
| Zfp354c   | 1.122  | 4.371 | 4.283  | 0.000 | 0.003 | -0.628 |
| 0610010FC | 1.276  | 7.407 | 4.281  | 0.000 | 0.003 | -0.633 |
| Kpna3     | 1.176  | 5.733 | 4.279  | 0.000 | 0.003 | -0.637 |
| LOC100046 | 1.153  | 4.448 | 4.279  | 0.000 | 0.003 | -0.637 |
| 4933407CC | -1.379 | 3.882 | -4.279 | 0.000 | 0.003 | -0.637 |
| Ifitm6    | 2.147  | 4.812 | 4.278  | 0.000 | 0.003 | -0.638 |
| Opn3      | -1.429 | 5.341 | -4.278 | 0.000 | 0.003 | -0.638 |
| Casp8ap2  | 1.302  | 7.075 | 4.278  | 0.000 | 0.003 | -0.639 |
| Ctsa      | 1.794  | 8.918 | 4.278  | 0.000 | 0.003 | -0.639 |
| Abi2      | 1.092  | 6.237 | 4.275  | 0.000 | 0.003 | -0.646 |
| Aplg2     | -1.037 | 5.812 | -4.275 | 0.000 | 0.003 | -0.647 |
| Pafah1b2  | 1.457  | 6.641 | 4.275  | 0.000 | 0.003 | -0.647 |
| Zfp385b   | -2.177 | 4.942 | -4.274 | 0.000 | 0.003 | -0.648 |
| Rsl1d1    | 1.411  | 8.408 | 4.272  | 0.000 | 0.003 | -0.654 |
| Rab33b    | 1.095  | 7.619 | 4.271  | 0.000 | 0.003 | -0.655 |
| Sox21     | -2.625 | 7.160 | -4.269 | 0.000 | 0.003 | -0.659 |
| Tspan13   | -2.639 | 9.096 | -4.265 | 0.000 | 0.003 | -0.668 |
| Ptk2      | 1.961  | 7.810 | 4.264  | 0.000 | 0.003 | -0.670 |
| Sertad2   | 1.168  | 6.670 | 4.263  | 0.000 | 0.003 | -0.672 |
| Nup2101   | -1.035 | 3.294 | -4.260 | 0.000 | 0.003 | -0.679 |
| AW557046  | -1.076 | 3.425 | -4.260 | 0.000 | 0.003 | -0.680 |
| Ctnna1    | 1.708  | 6.280 | 4.259  | 0.000 | 0.003 | -0.681 |
| Zfp52     | 2.154  | 6.808 | 4.257  | 0.000 | 0.003 | -0.687 |
| Abhd2     | 1.476  | 5.056 | 4.256  | 0.000 | 0.003 | -0.688 |
| Rps6ka5   | 1.038  | 3.898 | 4.256  | 0.000 | 0.003 | -0.689 |
| Maml1     | 1.538  | 7.280 | 4.256  | 0.000 | 0.003 | -0.689 |

|           |        |       |        |       |       |        |
|-----------|--------|-------|--------|-------|-------|--------|
| 4833408D1 | 1.220  | 6.254 | 4.256  | 0.000 | 0.003 | -0.690 |
| 2210409DC | -1.141 | 3.580 | -4.252 | 0.000 | 0.003 | -0.698 |
| Zdhhc5    | 1.042  | 6.891 | 4.251  | 0.000 | 0.003 | -0.699 |
| Zbtb34    | 1.144  | 5.353 | 4.250  | 0.000 | 0.003 | -0.702 |
| Pcyt2     | -1.172 | 7.722 | -4.248 | 0.000 | 0.003 | -0.706 |
| Fbx15     | 1.184  | 8.675 | 4.248  | 0.000 | 0.003 | -0.707 |
| Atxn1     | 1.374  | 6.488 | 4.244  | 0.000 | 0.003 | -0.716 |
| Aadac     | -3.001 | 4.811 | -4.243 | 0.000 | 0.003 | -0.718 |
| Vps11     | 1.424  | 6.044 | 4.243  | 0.000 | 0.003 | -0.718 |
| Serpina3r | 3.138  | 6.727 | 4.242  | 0.000 | 0.003 | -0.720 |
| Ifi204    | 2.283  | 4.260 | 4.242  | 0.000 | 0.003 | -0.720 |
| Dpy1914   | 2.073  | 7.072 | 4.242  | 0.000 | 0.003 | -0.721 |
| Rab8a     | 1.241  | 7.907 | 4.242  | 0.000 | 0.003 | -0.721 |
| Il17rc    | -1.133 | 6.440 | -4.241 | 0.000 | 0.003 | -0.722 |
| Lama2     | 1.383  | 4.537 | 4.240  | 0.000 | 0.003 | -0.724 |
| Mup10     | -3.514 | 3.903 | -4.239 | 0.000 | 0.003 | -0.726 |
| Sos2      | 1.979  | 7.678 | 4.239  | 0.000 | 0.003 | -0.727 |
| Ndn       | 2.002  | 4.281 | 4.237  | 0.000 | 0.003 | -0.732 |
| Cryz      | 1.340  | 7.983 | 4.236  | 0.000 | 0.003 | -0.735 |
| Ms4a6c    | 2.251  | 5.680 | 4.233  | 0.000 | 0.003 | -0.739 |
| Itgb4     | 1.523  | 7.466 | 4.233  | 0.000 | 0.003 | -0.740 |
| AI503301  | 1.226  | 5.595 | 4.232  | 0.000 | 0.003 | -0.743 |
| Acsm3     | -3.041 | 6.338 | -4.232 | 0.000 | 0.003 | -0.743 |
| Rock2     | 1.474  | 7.633 | 4.232  | 0.000 | 0.003 | -0.743 |
| Pcdhgal   | 1.154  | 5.947 | 4.227  | 0.000 | 0.003 | -0.753 |
| Naalad2   | 1.407  | 3.916 | 4.227  | 0.000 | 0.003 | -0.753 |
| Clca1     | 2.360  | 4.333 | 4.227  | 0.000 | 0.003 | -0.755 |
| BC028454  | 1.085  | 4.766 | 4.226  | 0.000 | 0.003 | -0.755 |
| Lac1      | -1.581 | 5.194 | -4.226 | 0.000 | 0.003 | -0.756 |
| Trim33    | 1.592  | 8.576 | 4.225  | 0.000 | 0.003 | -0.757 |
| Acap2     | 1.991  | 7.828 | 4.225  | 0.000 | 0.003 | -0.758 |
| Mmp3      | 2.532  | 4.658 | 4.222  | 0.000 | 0.003 | -0.765 |
| Cenpm     | -1.196 | 5.014 | -4.221 | 0.000 | 0.003 | -0.766 |
| Ssx2ip    | 1.897  | 5.650 | 4.221  | 0.000 | 0.003 | -0.766 |
| Sucnr1    | -1.124 | 2.966 | -4.220 | 0.000 | 0.003 | -0.770 |
| Tmem216   | 1.108  | 5.470 | 4.219  | 0.000 | 0.003 | -0.773 |
| Klf15     | -1.938 | 4.944 | -4.218 | 0.000 | 0.003 | -0.775 |
| E2f2      | -1.052 | 4.733 | -4.214 | 0.000 | 0.003 | -0.782 |
| Cldn3     | 2.514  | 5.517 | 4.213  | 0.000 | 0.003 | -0.785 |
| Acot9     | 2.295  | 8.290 | 4.210  | 0.001 | 0.003 | -0.791 |
| Midlip1   | -1.304 | 8.516 | -4.209 | 0.001 | 0.003 | -0.795 |
| Enpp2     | 1.066  | 3.894 | 4.207  | 0.001 | 0.003 | -0.798 |
| Abo       | -1.619 | 2.928 | -4.206 | 0.001 | 0.003 | -0.801 |
| BC051142  | -1.210 | 3.351 | -4.202 | 0.001 | 0.003 | -0.809 |
| Cd300a    | 1.182  | 4.111 | 4.201  | 0.001 | 0.003 | -0.812 |
| Gpx7      | 1.426  | 5.514 | 4.201  | 0.001 | 0.003 | -0.812 |
| Gm9983    | -1.230 | 6.646 | -4.201 | 0.001 | 0.003 | -0.812 |
| Kank2     | 1.241  | 5.241 | 4.199  | 0.001 | 0.003 | -0.817 |
| 4930573C  | -1.005 | 4.084 | -4.196 | 0.001 | 0.003 | -0.823 |
| Maob      | -2.261 | 6.026 | -4.195 | 0.001 | 0.003 | -0.825 |

|           |        |       |        |       |       |        |
|-----------|--------|-------|--------|-------|-------|--------|
| Hcls1     | 1.598  | 4.064 | 4.194  | 0.001 | 0.003 | -0.827 |
| Ehd4      | 1.583  | 7.760 | 4.192  | 0.001 | 0.003 | -0.833 |
| Zfand5    | 1.858  | 9.001 | 4.191  | 0.001 | 0.003 | -0.834 |
| D1Ert448  | 1.024  | 5.630 | 4.189  | 0.001 | 0.003 | -0.838 |
| LOC10004  | -1.038 | 5.878 | -4.189 | 0.001 | 0.003 | -0.839 |
| Ptf1a     | -1.596 | 3.656 | -4.189 | 0.001 | 0.003 | -0.840 |
| Chd2      | 1.172  | 7.578 | 4.189  | 0.001 | 0.003 | -0.840 |
| Fnip2     | 1.147  | 7.680 | 4.187  | 0.001 | 0.003 | -0.844 |
| Lypd3     | -1.117 | 3.507 | -4.185 | 0.001 | 0.003 | -0.848 |
| Sh3d19    | 1.117  | 5.080 | 4.184  | 0.001 | 0.003 | -0.849 |
| Slc16a2   | 1.281  | 4.269 | 4.184  | 0.001 | 0.003 | -0.850 |
| Mpp5      | 1.885  | 7.053 | 4.184  | 0.001 | 0.003 | -0.851 |
| Cul4b     | 1.083  | 6.989 | 4.179  | 0.001 | 0.003 | -0.861 |
| Gtf2e2    | 1.599  | 7.938 | 4.178  | 0.001 | 0.003 | -0.863 |
| Dnajc8    | 1.584  | 8.086 | 4.177  | 0.001 | 0.003 | -0.866 |
| Rlim      | 1.121  | 8.238 | 4.175  | 0.001 | 0.003 | -0.869 |
| Hs2st1    | 1.477  | 4.473 | 4.175  | 0.001 | 0.003 | -0.870 |
| Nudt16    | 1.096  | 6.601 | 4.174  | 0.001 | 0.003 | -0.872 |
| Rtkn      | 1.166  | 6.480 | 4.173  | 0.001 | 0.003 | -0.875 |
| Itfg3     | -1.228 | 8.405 | -4.171 | 0.001 | 0.003 | -0.880 |
| BC013712  | 1.032  | 4.196 | 4.171  | 0.001 | 0.003 | -0.880 |
| Alkbh8    | 1.065  | 5.597 | 4.168  | 0.001 | 0.003 | -0.886 |
| Gm12372   | 1.230  | 8.637 | 4.168  | 0.001 | 0.003 | -0.887 |
| Jmjd1c    | 1.640  | 7.879 | 4.163  | 0.001 | 0.003 | -0.897 |
| Mettl1    | -1.567 | 4.718 | -4.162 | 0.001 | 0.003 | -0.899 |
| 4933411K2 | 1.778  | 4.685 | 4.162  | 0.001 | 0.003 | -0.900 |
| Rbpj1     | -1.192 | 3.542 | -4.161 | 0.001 | 0.003 | -0.903 |
| Cnot8     | 1.141  | 7.271 | 4.160  | 0.001 | 0.003 | -0.904 |
| Mbnl3     | -1.405 | 3.935 | -4.159 | 0.001 | 0.003 | -0.907 |
| 9130221L2 | -1.635 | 3.670 | -4.159 | 0.001 | 0.003 | -0.907 |
| Amy2a2    | -4.531 | 5.986 | -4.159 | 0.001 | 0.003 | -0.907 |
| Ccdc141   | -1.455 | 3.849 | -4.158 | 0.001 | 0.003 | -0.909 |
| Cd47      | 1.706  | 9.073 | 4.157  | 0.001 | 0.003 | -0.911 |
| Wfs1      | 1.247  | 6.167 | 4.155  | 0.001 | 0.003 | -0.915 |
| Smndc1    | 1.077  | 6.007 | 4.153  | 0.001 | 0.003 | -0.920 |
| Nt5dc2    | 1.456  | 4.707 | 4.152  | 0.001 | 0.003 | -0.922 |
| Rcan3     | 1.334  | 6.505 | 4.148  | 0.001 | 0.003 | -0.931 |
| Kdelc2    | 1.270  | 6.774 | 4.147  | 0.001 | 0.003 | -0.934 |
| 9630013K1 | -1.014 | 3.014 | -4.146 | 0.001 | 0.003 | -0.935 |
| Ptpn5     | -1.060 | 3.324 | -4.146 | 0.001 | 0.003 | -0.935 |
| 28100430C | 1.087  | 5.798 | 4.146  | 0.001 | 0.003 | -0.936 |
| Hunk      | 1.786  | 5.512 | 4.145  | 0.001 | 0.003 | -0.937 |
| Paip2b    | 1.107  | 7.673 | 4.145  | 0.001 | 0.003 | -0.938 |
| Dnajc4    | -1.040 | 7.423 | -4.142 | 0.001 | 0.003 | -0.944 |
| Fut2      | -2.343 | 7.627 | -4.142 | 0.001 | 0.003 | -0.945 |
| Uap111    | 1.440  | 7.135 | 4.140  | 0.001 | 0.003 | -0.948 |
| AI607873  | 1.952  | 4.150 | 4.140  | 0.001 | 0.003 | -0.949 |
| Lrrc4     | -1.257 | 3.394 | -4.137 | 0.001 | 0.003 | -0.955 |
| Comtd1    | -1.498 | 6.644 | -4.136 | 0.001 | 0.003 | -0.957 |
| Dnajc5    | 1.727  | 7.767 | 4.134  | 0.001 | 0.003 | -0.962 |

|           |        |        |        |       |       |        |
|-----------|--------|--------|--------|-------|-------|--------|
| Dok2      | 1.707  | 5.239  | 4.134  | 0.001 | 0.003 | -0.963 |
| Pcsk1     | -1.986 | 3.491  | -4.132 | 0.001 | 0.003 | -0.968 |
| Agr2      | -5.263 | 9.165  | -4.131 | 0.001 | 0.003 | -0.969 |
| Nme3      | -1.295 | 7.080  | -4.131 | 0.001 | 0.003 | -0.970 |
| Parp10    | 1.274  | 5.274  | 4.131  | 0.001 | 0.003 | -0.970 |
| Dmx12     | 1.653  | 5.414  | 4.130  | 0.001 | 0.003 | -0.972 |
| Ftsj3     | 1.182  | 6.214  | 4.128  | 0.001 | 0.003 | -0.975 |
| AI256396  | 2.036  | 4.536  | 4.128  | 0.001 | 0.003 | -0.976 |
| Phc1      | 1.056  | 7.057  | 4.128  | 0.001 | 0.003 | -0.976 |
| Ildr1     | -1.041 | 3.071  | -4.128 | 0.001 | 0.003 | -0.977 |
| Mfhas1    | 1.384  | 7.734  | 4.126  | 0.001 | 0.003 | -0.980 |
| Sprrla    | 3.009  | 9.376  | 4.124  | 0.001 | 0.003 | -0.984 |
| Wdr1      | 1.288  | 8.368  | 4.124  | 0.001 | 0.003 | -0.986 |
| Zfp238    | 1.288  | 8.452  | 4.121  | 0.001 | 0.003 | -0.991 |
| Pigx      | 1.507  | 8.145  | 4.120  | 0.001 | 0.003 | -0.993 |
| Crispl    | 3.039  | 4.684  | 4.120  | 0.001 | 0.003 | -0.994 |
| LOC49725  | -1.332 | 3.667  | -4.119 | 0.001 | 0.003 | -0.997 |
| Phkg2     | 1.264  | 7.006  | 4.118  | 0.001 | 0.003 | -0.998 |
| Hey1      | 1.263  | 5.146  | 4.118  | 0.001 | 0.003 | -0.998 |
| Rgs17     | 1.771  | 3.673  | 4.117  | 0.001 | 0.003 | -1.000 |
| Nek3      | 1.455  | 5.555  | 4.117  | 0.001 | 0.003 | -1.000 |
| Auts2     | 1.216  | 4.397  | 4.111  | 0.001 | 0.003 | -1.014 |
| 2010205A1 | 3.327  | 8.813  | 4.108  | 0.001 | 0.003 | -1.021 |
| 1E+08     | 1.978  | 5.857  | 4.106  | 0.001 | 0.003 | -1.026 |
| Flii      | 1.318  | 8.256  | 4.106  | 0.001 | 0.003 | -1.026 |
| Cebpb     | 1.483  | 9.221  | 4.105  | 0.001 | 0.003 | -1.027 |
| Kctd9     | 1.664  | 6.306  | 4.105  | 0.001 | 0.003 | -1.027 |
| Sh3tcl    | 1.194  | 5.135  | 4.105  | 0.001 | 0.003 | -1.028 |
| Sacs      | 1.012  | 3.447  | 4.103  | 0.001 | 0.003 | -1.032 |
| Sprr2a1   | -4.657 | 10.683 | -4.101 | 0.001 | 0.004 | -1.036 |
| 1700019B  | -1.190 | 3.191  | -4.101 | 0.001 | 0.004 | -1.038 |
| Arl6ip6   | 1.022  | 6.956  | 4.097  | 0.001 | 0.004 | -1.045 |
| Mfsd4     | -2.609 | 6.752  | -4.095 | 0.001 | 0.004 | -1.050 |
| 1700086L1 | -1.843 | 3.348  | -4.090 | 0.001 | 0.004 | -1.062 |
| Tnrc6a    | 1.430  | 7.863  | 4.089  | 0.001 | 0.004 | -1.064 |
| Galnt16   | -2.543 | 3.951  | -4.087 | 0.001 | 0.004 | -1.068 |
| Slc39a11  | -2.091 | 8.264  | -4.086 | 0.001 | 0.004 | -1.070 |
| Fam178a   | 1.241  | 7.611  | 4.086  | 0.001 | 0.004 | -1.070 |
| Hip1      | 1.305  | 4.247  | 4.084  | 0.001 | 0.004 | -1.074 |
| Coro2b    | -1.142 | 4.330  | -4.081 | 0.001 | 0.004 | -1.081 |
| Sectmlb   | -2.350 | 3.964  | -4.081 | 0.001 | 0.004 | -1.082 |
| Unc45a    | 1.178  | 5.626  | 4.079  | 0.001 | 0.004 | -1.085 |
| D14Ertd4  | 1.212  | 6.017  | 4.079  | 0.001 | 0.004 | -1.085 |
| Has2      | 1.838  | 4.861  | 4.079  | 0.001 | 0.004 | -1.086 |
| Ttl       | 1.043  | 5.130  | 4.079  | 0.001 | 0.004 | -1.087 |
| Fabp4     | 2.542  | 8.426  | 4.078  | 0.001 | 0.004 | -1.088 |
| Prr151    | -2.179 | 7.803  | -4.078 | 0.001 | 0.004 | -1.088 |
| Ahr       | 2.121  | 8.156  | 4.077  | 0.001 | 0.004 | -1.090 |
| Gigyf1    | 1.017  | 7.448  | 4.075  | 0.001 | 0.004 | -1.095 |
| Vtn       | -2.093 | 3.916  | -4.074 | 0.001 | 0.004 | -1.097 |

|           |        |        |        |       |       |        |
|-----------|--------|--------|--------|-------|-------|--------|
| Cacnb3    | 1.294  | 6.759  | 4.073  | 0.001 | 0.004 | -1.099 |
| Foxa3     | -2.614 | 6.680  | -4.072 | 0.001 | 0.004 | -1.102 |
| Rbm3      | 1.763  | 11.244 | 4.070  | 0.001 | 0.004 | -1.106 |
| Tmem209   | 1.014  | 5.755  | 4.069  | 0.001 | 0.004 | -1.107 |
| Ing3      | 1.322  | 6.165  | 4.066  | 0.001 | 0.004 | -1.116 |
| Cdca2     | -1.517 | 5.042  | -4.064 | 0.001 | 0.004 | -1.118 |
| Gars      | 1.212  | 9.708  | 4.063  | 0.001 | 0.004 | -1.121 |
| Atxn2     | 1.183  | 8.376  | 4.061  | 0.001 | 0.004 | -1.126 |
| Cox10     | -1.083 | 5.335  | -4.059 | 0.001 | 0.004 | -1.132 |
| Tec       | 1.548  | 6.348  | 4.058  | 0.001 | 0.004 | -1.133 |
| Cetn4     | 1.521  | 5.235  | 4.058  | 0.001 | 0.004 | -1.133 |
| Ifi203    | 2.733  | 5.534  | 4.057  | 0.001 | 0.004 | -1.135 |
| Naalad12  | -1.017 | 4.073  | -4.057 | 0.001 | 0.004 | -1.136 |
| Setd6     | -1.158 | 6.948  | -4.056 | 0.001 | 0.004 | -1.137 |
| Dnajb6    | 1.133  | 5.905  | 4.056  | 0.001 | 0.004 | -1.138 |
| Pex11a    | -1.046 | 5.936  | -4.054 | 0.001 | 0.004 | -1.142 |
| Itpkc     | 1.165  | 5.806  | 4.054  | 0.001 | 0.004 | -1.143 |
| Gmpr2     | 1.187  | 6.570  | 4.053  | 0.001 | 0.004 | -1.143 |
| Synj1     | 1.481  | 6.035  | 4.052  | 0.001 | 0.004 | -1.146 |
| Gm8615    | 1.467  | 6.455  | 4.052  | 0.001 | 0.004 | -1.147 |
| Ccdc64b   | -2.107 | 4.381  | -4.051 | 0.001 | 0.004 | -1.148 |
| Camk2d    | 1.403  | 7.075  | 4.051  | 0.001 | 0.004 | -1.150 |
| 1700016K1 | -1.828 | 4.410  | -4.047 | 0.001 | 0.004 | -1.157 |
| Plekhn1   | 1.016  | 4.145  | 4.047  | 0.001 | 0.004 | -1.157 |
| Rsrc1     | 1.275  | 6.595  | 4.045  | 0.001 | 0.004 | -1.162 |
| Ctdspl2   | 1.636  | 6.948  | 4.040  | 0.001 | 0.004 | -1.173 |
| Pstk      | -1.051 | 6.656  | -4.040 | 0.001 | 0.004 | -1.173 |
| B230219Dz | 1.474  | 9.574  | 4.040  | 0.001 | 0.004 | -1.174 |
| Nrip1     | 1.594  | 7.538  | 4.039  | 0.001 | 0.004 | -1.175 |
| 9230108I1 | 1.022  | 6.715  | 4.039  | 0.001 | 0.004 | -1.176 |
| Rassf2    | 1.253  | 3.899  | 4.037  | 0.001 | 0.004 | -1.180 |
| Trfr2     | 2.539  | 5.343  | 4.033  | 0.001 | 0.004 | -1.189 |
| Ift81     | 1.008  | 5.829  | 4.032  | 0.001 | 0.004 | -1.190 |
| 061001001 | -1.535 | 11.338 | -4.030 | 0.001 | 0.004 | -1.197 |
| Plscr4    | 1.887  | 4.234  | 4.029  | 0.001 | 0.004 | -1.197 |
| Cdc37     | 1.668  | 8.825  | 4.028  | 0.001 | 0.004 | -1.201 |
| Ufd11     | 1.336  | 7.265  | 4.027  | 0.001 | 0.004 | -1.202 |
| Sema3e    | 1.961  | 5.227  | 4.027  | 0.001 | 0.004 | -1.204 |
| Vps41     | 1.125  | 6.764  | 4.026  | 0.001 | 0.004 | -1.204 |
| Pion      | 1.204  | 3.484  | 4.026  | 0.001 | 0.004 | -1.205 |
| Gcat      | -1.535 | 5.548  | -4.025 | 0.001 | 0.004 | -1.206 |
| Fgl1      | -1.085 | 3.821  | -4.025 | 0.001 | 0.004 | -1.207 |
| Batf2     | -1.041 | 3.872  | -4.025 | 0.001 | 0.004 | -1.207 |
| 9130409Jz | -2.097 | 4.271  | -4.025 | 0.001 | 0.004 | -1.208 |
| Trh       | -1.049 | 3.245  | -4.023 | 0.001 | 0.004 | -1.211 |
| Gcnt2     | 1.430  | 4.191  | 4.023  | 0.001 | 0.004 | -1.212 |
| Pigm      | 1.287  | 5.347  | 4.017  | 0.001 | 0.004 | -1.226 |
| Sort1     | -1.615 | 7.943  | -4.016 | 0.001 | 0.004 | -1.226 |
| Ptdss1    | -1.112 | 3.740  | -4.015 | 0.001 | 0.004 | -1.229 |
| Nup155    | 1.243  | 6.046  | 4.015  | 0.001 | 0.004 | -1.230 |

|           |        |       |        |       |       |        |
|-----------|--------|-------|--------|-------|-------|--------|
| Mmaa      | -1.185 | 5.733 | -4.015 | 0.001 | 0.004 | -1.230 |
| Phf1      | 1.034  | 5.463 | 4.014  | 0.001 | 0.004 | -1.231 |
| Tbcd17    | 1.171  | 6.246 | 4.012  | 0.001 | 0.004 | -1.235 |
| Pde4b     | 1.068  | 4.483 | 4.011  | 0.001 | 0.004 | -1.239 |
| Tfblm     | -1.071 | 4.263 | -4.011 | 0.001 | 0.004 | -1.239 |
| Egfr      | 1.247  | 6.788 | 4.011  | 0.001 | 0.004 | -1.239 |
| Armc10    | 1.365  | 7.809 | 4.010  | 0.001 | 0.004 | -1.241 |
| Myo1b     | 1.772  | 6.434 | 4.007  | 0.001 | 0.004 | -1.247 |
| Ggps1     | 1.246  | 5.693 | 4.005  | 0.001 | 0.004 | -1.251 |
| Actl6a    | 1.294  | 7.495 | 4.003  | 0.001 | 0.004 | -1.256 |
| Zfp622    | 1.020  | 6.625 | 4.003  | 0.001 | 0.004 | -1.256 |
| Serpina3g | 1.510  | 4.260 | 4.002  | 0.001 | 0.004 | -1.259 |
| Ppp1r13l  | 1.369  | 6.084 | 4.002  | 0.001 | 0.004 | -1.260 |
| 5330406Mz | 1.643  | 7.276 | 4.001  | 0.001 | 0.004 | -1.261 |
| Mynn      | 1.122  | 3.927 | 4.000  | 0.001 | 0.004 | -1.263 |
| LOC100048 | 1.319  | 7.909 | 3.996  | 0.001 | 0.004 | -1.272 |
| Sox18     | 1.471  | 5.345 | 3.994  | 0.001 | 0.004 | -1.276 |
| Rab25     | -2.725 | 7.929 | -3.992 | 0.001 | 0.004 | -1.282 |
| St14      | -2.270 | 8.290 | -3.991 | 0.001 | 0.004 | -1.283 |
| Atp6v1b2  | 1.762  | 8.565 | 3.990  | 0.001 | 0.004 | -1.284 |
| A230061C1 | 1.386  | 6.703 | 3.990  | 0.001 | 0.004 | -1.286 |
| Sstr2     | -1.677 | 4.236 | -3.987 | 0.001 | 0.004 | -1.292 |
| Nek1      | 1.416  | 6.227 | 3.987  | 0.001 | 0.004 | -1.293 |
| Osbpl1a   | -1.476 | 6.430 | -3.986 | 0.001 | 0.004 | -1.294 |
| Gstt3     | -1.853 | 6.278 | -3.985 | 0.001 | 0.004 | -1.296 |
| 2-Sep     | 1.353  | 9.306 | 3.985  | 0.001 | 0.004 | -1.296 |
| Tlr2      | 1.536  | 5.104 | 3.983  | 0.001 | 0.004 | -1.301 |
| Odz3      | -1.029 | 3.713 | -3.982 | 0.001 | 0.004 | -1.303 |
| Irx5      | 2.159  | 6.442 | 3.980  | 0.001 | 0.004 | -1.307 |
| 4932415G1 | -1.015 | 4.514 | -3.977 | 0.001 | 0.004 | -1.314 |
| Zmynd8    | 1.599  | 8.085 | 3.977  | 0.001 | 0.004 | -1.315 |
| D19Ert4C  | 1.573  | 6.815 | 3.976  | 0.001 | 0.004 | -1.316 |
| Tspan5    | 1.589  | 5.724 | 3.976  | 0.001 | 0.004 | -1.316 |
| Clybl     | -1.662 | 6.313 | -3.976 | 0.001 | 0.004 | -1.317 |
| Krt13     | -2.344 | 4.224 | -3.976 | 0.001 | 0.004 | -1.318 |
| Tead4     | 1.016  | 3.423 | 3.973  | 0.001 | 0.004 | -1.323 |
| Trim3     | 1.007  | 6.154 | 3.973  | 0.001 | 0.004 | -1.324 |
| Svep1     | 1.411  | 4.491 | 3.972  | 0.001 | 0.004 | -1.325 |
| Gbp2      | 2.188  | 4.639 | 3.971  | 0.001 | 0.004 | -1.329 |
| Prdm5     | 1.412  | 4.944 | 3.970  | 0.001 | 0.004 | -1.329 |
| Tmprss11e | 1.800  | 3.608 | 3.970  | 0.001 | 0.004 | -1.331 |
| Eps8      | 1.789  | 8.532 | 3.969  | 0.001 | 0.004 | -1.332 |
| 2610001JC | 1.430  | 8.946 | 3.969  | 0.001 | 0.004 | -1.332 |
| Lrwd1     | 1.070  | 6.466 | 3.969  | 0.001 | 0.004 | -1.332 |
| Tm4sf5    | -2.935 | 5.395 | -3.967 | 0.001 | 0.004 | -1.336 |
| Scn1lg    | -1.123 | 3.790 | -3.966 | 0.001 | 0.004 | -1.338 |
| Nid2      | 1.411  | 4.533 | 3.964  | 0.001 | 0.004 | -1.344 |
| Trib2     | 1.775  | 6.735 | 3.957  | 0.001 | 0.004 | -1.359 |
| Mfsd6     | -1.019 | 5.402 | -3.957 | 0.001 | 0.004 | -1.360 |
| Celf2     | 1.415  | 7.208 | 3.956  | 0.001 | 0.004 | -1.363 |

|           |        |        |        |       |       |        |
|-----------|--------|--------|--------|-------|-------|--------|
| Prss32    | -1.836 | 3.766  | -3.955 | 0.001 | 0.004 | -1.364 |
| Phgdh     | 1.667  | 7.624  | 3.953  | 0.001 | 0.004 | -1.368 |
| 1810073Gz | -1.073 | 3.209  | -3.953 | 0.001 | 0.004 | -1.369 |
| Cfb       | 1.924  | 6.580  | 3.951  | 0.001 | 0.005 | -1.372 |
| Ptprc     | 2.681  | 7.354  | 3.951  | 0.001 | 0.005 | -1.373 |
| Slc35b4   | 1.005  | 4.873  | 3.950  | 0.001 | 0.005 | -1.376 |
| Rbp7      | -1.914 | 3.854  | -3.949 | 0.001 | 0.005 | -1.378 |
| Vgll4     | 1.464  | 7.181  | 3.947  | 0.001 | 0.005 | -1.383 |
| 4833441D1 | 2.314  | 5.710  | 3.945  | 0.001 | 0.005 | -1.386 |
| Evi2b     | 1.444  | 5.054  | 3.945  | 0.001 | 0.005 | -1.387 |
| Fam107a   | 2.858  | 4.721  | 3.944  | 0.001 | 0.005 | -1.388 |
| Apobec2   | -1.493 | 3.097  | -3.944 | 0.001 | 0.005 | -1.389 |
| Pim1      | 1.168  | 4.974  | 3.944  | 0.001 | 0.005 | -1.389 |
| Robo1     | 1.868  | 4.148  | 3.942  | 0.001 | 0.005 | -1.394 |
| Ccr2      | 1.364  | 4.442  | 3.941  | 0.001 | 0.005 | -1.394 |
| Igh-2     | 3.034  | 9.044  | 3.941  | 0.001 | 0.005 | -1.395 |
| D030041Hz | 1.302  | 5.512  | 3.940  | 0.001 | 0.005 | -1.397 |
| Lgals3bp  | 1.763  | 9.173  | 3.938  | 0.001 | 0.005 | -1.402 |
| Ptprg     | 1.039  | 6.358  | 3.936  | 0.001 | 0.005 | -1.407 |
| Slc41a2   | -1.815 | 7.687  | -3.935 | 0.001 | 0.005 | -1.409 |
| Arhgap21  | 1.651  | 7.344  | 3.934  | 0.001 | 0.005 | -1.412 |
| 1700047I1 | 1.200  | 4.436  | 3.931  | 0.001 | 0.005 | -1.418 |
| Ifi205    | 3.109  | 6.249  | 3.931  | 0.001 | 0.005 | -1.418 |
| Slc25a4   | 1.107  | 10.751 | 3.930  | 0.001 | 0.005 | -1.419 |
| LOC55290f | 1.084  | 5.579  | 3.930  | 0.001 | 0.005 | -1.420 |
| Katnall   | 1.036  | 3.315  | 3.930  | 0.001 | 0.005 | -1.420 |
| Spdef     | -2.880 | 6.352  | -3.929 | 0.001 | 0.005 | -1.421 |
| Pigt      | -1.783 | 5.338  | -3.927 | 0.001 | 0.005 | -1.426 |
| Ttc39a    | -2.318 | 7.014  | -3.927 | 0.001 | 0.005 | -1.427 |
| LOC10004f | 1.119  | 7.443  | 3.926  | 0.001 | 0.005 | -1.428 |
| LOC10004z | 1.063  | 4.719  | 3.926  | 0.001 | 0.005 | -1.429 |
| Ccl24     | 1.491  | 4.421  | 3.925  | 0.001 | 0.005 | -1.431 |
| Slc2a1    | 1.596  | 9.388  | 3.923  | 0.001 | 0.005 | -1.435 |
| Ubqln1    | 1.273  | 6.327  | 3.921  | 0.001 | 0.005 | -1.439 |
| Myh6      | -1.181 | 3.438  | -3.921 | 0.001 | 0.005 | -1.441 |
| Capn13    | -2.188 | 3.790  | -3.920 | 0.001 | 0.005 | -1.442 |
| Gbp6      | 1.565  | 6.161  | 3.919  | 0.001 | 0.005 | -1.444 |
| Edc3      | 1.142  | 6.297  | 3.918  | 0.001 | 0.005 | -1.446 |
| Zfp326    | 1.318  | 6.509  | 3.917  | 0.001 | 0.005 | -1.448 |
| Kcnq1     | -2.158 | 7.184  | -3.917 | 0.001 | 0.005 | -1.449 |
| Fubp1     | 1.349  | 7.150  | 3.916  | 0.001 | 0.005 | -1.451 |
| Chst1     | 1.506  | 4.822  | 3.914  | 0.001 | 0.005 | -1.455 |
| Ankrd17   | 1.501  | 8.539  | 3.914  | 0.001 | 0.005 | -1.455 |
| Tox4      | 1.237  | 7.196  | 3.911  | 0.001 | 0.005 | -1.462 |
| 1700009P1 | -1.023 | 4.269  | -3.911 | 0.001 | 0.005 | -1.463 |
| Psma7     | 1.092  | 10.149 | 3.910  | 0.001 | 0.005 | -1.464 |
| Wfdc15b   | -2.538 | 4.361  | -3.905 | 0.001 | 0.005 | -1.476 |
| Rnf217    | 1.336  | 7.471  | 3.903  | 0.001 | 0.005 | -1.481 |
| 8430408Gz | 2.373  | 6.826  | 3.901  | 0.001 | 0.005 | -1.484 |
| Mreg      | -1.473 | 5.017  | -3.901 | 0.001 | 0.005 | -1.484 |

|           |        |        |        |       |       |        |
|-----------|--------|--------|--------|-------|-------|--------|
| Ddx59     | 1.028  | 5.235  | 3.900  | 0.001 | 0.005 | -1.486 |
| Stx16     | 1.504  | 7.406  | 3.900  | 0.001 | 0.005 | -1.487 |
| E330037M  | -2.086 | 3.405  | -3.900 | 0.001 | 0.005 | -1.487 |
| Lox       | 2.496  | 7.998  | 3.898  | 0.001 | 0.005 | -1.491 |
| Zkscan14  | 1.007  | 5.517  | 3.898  | 0.001 | 0.005 | -1.492 |
| Klhdc9    | 1.155  | 6.660  | 3.895  | 0.001 | 0.005 | -1.497 |
| 1810031K1 | 1.280  | 7.472  | 3.895  | 0.001 | 0.005 | -1.497 |
| Mgea5     | 1.206  | 8.070  | 3.894  | 0.001 | 0.005 | -1.501 |
| A430088I1 | -1.166 | 3.796  | -3.891 | 0.001 | 0.005 | -1.507 |
| Zfp869    | 1.005  | 6.037  | 3.891  | 0.001 | 0.005 | -1.507 |
| 1810058N  | -2.043 | 4.623  | -3.891 | 0.001 | 0.005 | -1.508 |
| Hlfoo     | -1.023 | 3.247  | -3.889 | 0.001 | 0.005 | -1.512 |
| Apcdd1    | 2.002  | 4.661  | 3.888  | 0.001 | 0.005 | -1.514 |
| Smc3      | 1.711  | 7.880  | 3.887  | 0.001 | 0.005 | -1.516 |
| Gpm6a     | -2.543 | 3.754  | -3.885 | 0.001 | 0.005 | -1.520 |
| L2hgdh    | -1.219 | 6.328  | -3.884 | 0.001 | 0.005 | -1.522 |
| Vcpipl    | 1.687  | 6.885  | 3.883  | 0.001 | 0.005 | -1.524 |
| Sfrs14    | 1.004  | 5.997  | 3.883  | 0.001 | 0.005 | -1.525 |
| Nedd41    | 1.307  | 6.988  | 3.881  | 0.001 | 0.005 | -1.529 |
| Sephs1    | 1.022  | 6.608  | 3.879  | 0.001 | 0.005 | -1.533 |
| Sntb2     | 1.004  | 5.032  | 3.878  | 0.001 | 0.005 | -1.536 |
| Ovca2     | -1.018 | 5.275  | -3.877 | 0.001 | 0.005 | -1.538 |
| Gan       | 1.719  | 6.673  | 3.874  | 0.001 | 0.005 | -1.545 |
| Spns1     | 1.086  | 5.994  | 3.873  | 0.001 | 0.005 | -1.546 |
| Kdm3a     | 1.990  | 8.976  | 3.872  | 0.001 | 0.005 | -1.548 |
| 4933406C1 | -1.123 | 3.300  | -3.872 | 0.001 | 0.005 | -1.550 |
| Yaf2      | 1.383  | 7.922  | 3.871  | 0.001 | 0.005 | -1.552 |
| Tsen15    | 1.098  | 6.241  | 3.870  | 0.001 | 0.005 | -1.555 |
| LOC100045 | 1.367  | 6.483  | 3.869  | 0.001 | 0.005 | -1.557 |
| Cpm       | -2.204 | 5.025  | -3.868 | 0.001 | 0.005 | -1.559 |
| Itm2a     | 2.011  | 7.425  | 3.864  | 0.001 | 0.005 | -1.566 |
| Cym       | -2.201 | 4.419  | -3.864 | 0.001 | 0.005 | -1.567 |
| Gpsm3     | 1.055  | 4.915  | 3.864  | 0.001 | 0.005 | -1.568 |
| Set       | 1.131  | 9.662  | 3.863  | 0.001 | 0.005 | -1.569 |
| Ab11      | 1.306  | 8.022  | 3.862  | 0.001 | 0.005 | -1.573 |
| 1110007C  | 1.143  | 8.570  | 3.860  | 0.001 | 0.005 | -1.576 |
| Peci      | 1.352  | 8.440  | 3.859  | 0.001 | 0.005 | -1.579 |
| Csf3r     | 1.025  | 4.411  | 3.858  | 0.001 | 0.005 | -1.580 |
| 4930595D1 | 1.037  | 3.227  | 3.857  | 0.001 | 0.005 | -1.583 |
| Rac1      | 1.421  | 10.294 | 3.856  | 0.001 | 0.005 | -1.584 |
| Myh7      | -1.378 | 3.472  | -3.855 | 0.001 | 0.005 | -1.587 |
| Kdmla     | 1.391  | 7.808  | 3.855  | 0.001 | 0.005 | -1.587 |
| Gml2844   | 1.631  | 9.199  | 3.854  | 0.001 | 0.005 | -1.590 |
| Rtcd1     | 1.190  | 8.428  | 3.853  | 0.001 | 0.005 | -1.592 |
| Cd84      | 1.774  | 5.518  | 3.852  | 0.001 | 0.005 | -1.594 |
| Ctsf      | 1.547  | 5.718  | 3.849  | 0.001 | 0.005 | -1.601 |
| Atf2      | 1.451  | 6.779  | 3.848  | 0.001 | 0.005 | -1.602 |
| Nrxn2     | -1.041 | 3.680  | -3.848 | 0.001 | 0.005 | -1.602 |
| Rabif     | 1.205  | 7.485  | 3.848  | 0.001 | 0.005 | -1.603 |
| Dlg1      | 1.088  | 4.162  | 3.848  | 0.001 | 0.005 | -1.603 |



|           |        |        |        |       |       |        |
|-----------|--------|--------|--------|-------|-------|--------|
| Slurp1    | -2.026 | 4.542  | -3.847 | 0.001 | 0.005 | -1.604 |
| Igbp1     | -1.055 | 3.341  | -3.846 | 0.001 | 0.005 | -1.608 |
| Fzd3      | -1.134 | 3.037  | -3.842 | 0.001 | 0.005 | -1.616 |
| Cmtm8     | -2.025 | 7.013  | -3.839 | 0.001 | 0.005 | -1.622 |
| Fjx1      | 1.084  | 3.963  | 3.838  | 0.001 | 0.005 | -1.625 |
| Gm6030    | -1.499 | 3.317  | -3.834 | 0.001 | 0.005 | -1.635 |
| Stard3nl  | 1.696  | 7.851  | 3.831  | 0.001 | 0.006 | -1.640 |
| Timp3     | 1.575  | 4.057  | 3.831  | 0.001 | 0.006 | -1.642 |
| Gpr133    | 1.760  | 4.908  | 3.830  | 0.001 | 0.006 | -1.642 |
| Oxsr1     | 1.232  | 7.210  | 3.830  | 0.001 | 0.006 | -1.644 |
| Ethel     | -1.692 | 8.003  | -3.829 | 0.001 | 0.006 | -1.646 |
| BC032203  | 1.328  | 5.463  | 3.828  | 0.001 | 0.006 | -1.647 |
| Phxr5     | -1.562 | 5.253  | -3.827 | 0.001 | 0.006 | -1.651 |
| Zfp3611   | 1.267  | 7.766  | 3.825  | 0.001 | 0.006 | -1.654 |
| Dyrk1a    | 1.792  | 4.732  | 3.825  | 0.001 | 0.006 | -1.655 |
| Mut       | -1.614 | 7.425  | -3.824 | 0.001 | 0.006 | -1.657 |
| 2310079NC | 1.005  | 6.972  | 3.823  | 0.001 | 0.006 | -1.658 |
| Id4       | -1.502 | 5.694  | -3.822 | 0.001 | 0.006 | -1.661 |
| D630039AC | -2.039 | 6.622  | -3.820 | 0.001 | 0.006 | -1.666 |
| LOC10004C | 1.265  | 7.519  | 3.819  | 0.001 | 0.006 | -1.668 |
| Gnai2     | 1.683  | 9.515  | 3.818  | 0.001 | 0.006 | -1.670 |
| Rbm34     | 1.097  | 7.317  | 3.817  | 0.001 | 0.006 | -1.671 |
| Scfd2     | -1.021 | 5.102  | -3.816 | 0.001 | 0.006 | -1.674 |
| Pin1      | 1.065  | 8.299  | 3.816  | 0.001 | 0.006 | -1.676 |
| Psph      | 1.481  | 7.095  | 3.815  | 0.001 | 0.006 | -1.677 |
| Rasa1     | 1.704  | 8.558  | 3.815  | 0.001 | 0.006 | -1.678 |
| Sipa112   | 1.003  | 5.188  | 3.812  | 0.001 | 0.006 | -1.683 |
| Stox2     | -1.071 | 4.551  | -3.811 | 0.001 | 0.006 | -1.685 |
| Ormdl3    | 1.291  | 6.455  | 3.811  | 0.001 | 0.006 | -1.685 |
| Asb3      | 1.092  | 5.728  | 3.810  | 0.001 | 0.006 | -1.688 |
| Glrp1     | 2.049  | 4.118  | 3.810  | 0.001 | 0.006 | -1.689 |
| Ano9      | -1.535 | 4.082  | -3.809 | 0.001 | 0.006 | -1.690 |
| Rasa2     | 1.059  | 8.347  | 3.807  | 0.001 | 0.006 | -1.694 |
| H2-Aa     | 2.794  | 9.199  | 3.806  | 0.001 | 0.006 | -1.697 |
| Gabarapl1 | 2.340  | 6.984  | 3.804  | 0.001 | 0.006 | -1.701 |
| Ggps1     | 1.162  | 5.088  | 3.804  | 0.001 | 0.006 | -1.702 |
| Cstf2t    | 1.476  | 8.041  | 3.803  | 0.001 | 0.006 | -1.703 |
| Trim34    | 1.063  | 4.466  | 3.802  | 0.001 | 0.006 | -1.706 |
| Selplg    | 1.437  | 5.316  | 3.802  | 0.001 | 0.006 | -1.706 |
| Gm6377    | 1.001  | 3.880  | 3.801  | 0.001 | 0.006 | -1.707 |
| Utp15     | 1.102  | 6.412  | 3.801  | 0.001 | 0.006 | -1.707 |
| Ran       | 1.352  | 7.546  | 3.799  | 0.001 | 0.006 | -1.712 |
| Itpr3     | 1.371  | 8.463  | 3.794  | 0.001 | 0.006 | -1.723 |
| Tomm20    | 1.375  | 10.261 | 3.794  | 0.001 | 0.006 | -1.724 |
| Gm6293    | -3.028 | 4.958  | -3.794 | 0.001 | 0.006 | -1.724 |
| Sfrs17b   | 1.011  | 4.117  | 3.789  | 0.001 | 0.006 | -1.734 |
| Nedd9     | 1.298  | 7.737  | 3.788  | 0.001 | 0.006 | -1.736 |
| S100a10   | 2.336  | 11.171 | 3.785  | 0.001 | 0.006 | -1.745 |
| Acot8     | -1.020 | 7.142  | -3.784 | 0.001 | 0.006 | -1.746 |
| Zfp498    | 1.167  | 7.222  | 3.783  | 0.001 | 0.006 | -1.748 |

|           |        |        |        |       |       |        |
|-----------|--------|--------|--------|-------|-------|--------|
| Zfp280c   | 1.011  | 6.818  | 3.783  | 0.001 | 0.006 | -1.749 |
| AI451617  | 1.754  | 4.342  | 3.782  | 0.001 | 0.006 | -1.751 |
| Tmem54    | -2.891 | 6.373  | -3.781 | 0.001 | 0.006 | -1.752 |
| Adcy7     | 1.113  | 4.503  | 3.781  | 0.001 | 0.006 | -1.752 |
| Wdr53     | 1.003  | 5.379  | 3.781  | 0.001 | 0.006 | -1.753 |
| Lrp6      | 1.189  | 5.724  | 3.780  | 0.001 | 0.006 | -1.756 |
| Wdr45     | 1.175  | 7.760  | 3.779  | 0.001 | 0.006 | -1.757 |
| Bzwl      | 1.741  | 8.877  | 3.779  | 0.001 | 0.006 | -1.757 |
| Gnail     | -1.515 | 5.443  | -3.777 | 0.001 | 0.006 | -1.761 |
| Ptprd     | -2.648 | 5.326  | -3.776 | 0.001 | 0.006 | -1.764 |
| Havcr2    | 1.062  | 3.892  | 3.772  | 0.001 | 0.006 | -1.773 |
| Pccb      | -1.756 | 6.036  | -3.772 | 0.001 | 0.006 | -1.773 |
| Ntan1     | 1.543  | 8.659  | 3.769  | 0.001 | 0.006 | -1.778 |
| 1110018N2 | -1.211 | 2.972  | -3.768 | 0.001 | 0.006 | -1.781 |
| Calm3     | 1.611  | 8.874  | 3.768  | 0.001 | 0.006 | -1.782 |
| Pira2     | 1.035  | 3.933  | 3.765  | 0.001 | 0.006 | -1.789 |
| Slc7a4    | -1.348 | 5.722  | -3.763 | 0.001 | 0.006 | -1.793 |
| Klk1b22   | -2.351 | 4.459  | -3.761 | 0.001 | 0.006 | -1.798 |
| Ndufs1    | -1.067 | 8.937  | -3.759 | 0.001 | 0.006 | -1.801 |
| Gstt2     | -2.161 | 6.554  | -3.758 | 0.001 | 0.006 | -1.804 |
| Map2k5    | 1.089  | 5.930  | 3.755  | 0.001 | 0.006 | -1.811 |
| Gm7895    | 1.233  | 6.088  | 3.754  | 0.001 | 0.006 | -1.812 |
| H2-Eb1    | 2.316  | 7.592  | 3.750  | 0.001 | 0.006 | -1.822 |
| Acaa2     | -1.036 | 8.344  | -3.749 | 0.001 | 0.006 | -1.824 |
| AW107722  | -1.337 | 4.830  | -3.748 | 0.001 | 0.006 | -1.826 |
| Gpx2      | -3.061 | 9.098  | -3.745 | 0.001 | 0.006 | -1.832 |
| Rfk       | -1.061 | 8.834  | -3.745 | 0.001 | 0.006 | -1.833 |
| Anapc7    | 1.102  | 7.628  | 3.745  | 0.001 | 0.006 | -1.833 |
| Ifngr2    | 2.558  | 6.985  | 3.742  | 0.001 | 0.006 | -1.840 |
| Fxyd3     | -2.076 | 11.243 | -3.740 | 0.001 | 0.006 | -1.843 |
| Slc7a7    | 1.416  | 6.684  | 3.738  | 0.001 | 0.006 | -1.847 |
| Sin3a     | 1.103  | 6.231  | 3.735  | 0.001 | 0.006 | -1.855 |
| Mvp       | 1.146  | 6.566  | 3.734  | 0.001 | 0.006 | -1.856 |
| Gm7536    | -1.157 | 7.665  | -3.734 | 0.001 | 0.006 | -1.858 |
| Stk24     | 1.335  | 7.636  | 3.733  | 0.001 | 0.006 | -1.859 |
| Acsf3     | -1.034 | 5.411  | -3.733 | 0.001 | 0.006 | -1.860 |
| Tmem150c  | 1.196  | 3.376  | 3.733  | 0.001 | 0.006 | -1.860 |
| Gm16136   | -2.139 | 5.380  | -3.732 | 0.001 | 0.007 | -1.861 |
| LOC100046 | 1.520  | 6.133  | 3.731  | 0.001 | 0.007 | -1.864 |
| Tmem212   | 2.714  | 5.659  | 3.730  | 0.001 | 0.007 | -1.865 |
| Nox4      | 1.017  | 3.436  | 3.730  | 0.001 | 0.007 | -1.866 |
| Ammecr11  | 1.066  | 5.195  | 3.729  | 0.001 | 0.007 | -1.868 |
| Kbtbd2    | 1.710  | 8.132  | 3.728  | 0.001 | 0.007 | -1.871 |
| Zmyml     | 1.163  | 5.640  | 3.727  | 0.001 | 0.007 | -1.873 |
| Scml4     | -1.161 | 3.509  | -3.726 | 0.001 | 0.007 | -1.874 |
| Prep      | 1.092  | 7.454  | 3.725  | 0.001 | 0.007 | -1.877 |
| Tmem49    | 1.463  | 7.400  | 3.724  | 0.001 | 0.007 | -1.880 |
| Capn9     | -2.717 | 4.264  | -3.723 | 0.002 | 0.007 | -1.882 |
| Pik3c2g   | -2.368 | 4.278  | -3.723 | 0.002 | 0.007 | -1.882 |
| LOC676674 | 1.247  | 4.721  | 3.717  | 0.002 | 0.007 | -1.895 |

|           |        |       |        |       |       |        |
|-----------|--------|-------|--------|-------|-------|--------|
| 2310042D1 | -1.087 | 3.170 | -3.715 | 0.002 | 0.007 | -1.900 |
| Ptges     | 1.922  | 4.553 | 3.713  | 0.002 | 0.007 | -1.903 |
| Tjp2      | 1.832  | 8.590 | 3.712  | 0.002 | 0.007 | -1.907 |
| 2210020M  | -1.083 | 4.025 | -3.712 | 0.002 | 0.007 | -1.907 |
| Gm10567   | 1.183  | 4.010 | 3.712  | 0.002 | 0.007 | -1.907 |
| 2310002L1 | 2.141  | 4.121 | 3.710  | 0.002 | 0.007 | -1.911 |
| 2310003L2 | -1.313 | 5.836 | -3.709 | 0.002 | 0.007 | -1.912 |
| Setd3     | 1.258  | 5.293 | 3.709  | 0.002 | 0.007 | -1.912 |
| Pfas      | 1.130  | 5.584 | 3.708  | 0.002 | 0.007 | -1.915 |
| Tmx3      | 1.521  | 7.805 | 3.707  | 0.002 | 0.007 | -1.918 |
| 5430421B1 | -1.541 | 5.381 | -3.707 | 0.002 | 0.007 | -1.918 |
| Hist1h3a  | -1.371 | 5.909 | -3.706 | 0.002 | 0.007 | -1.920 |
| Id3       | -1.307 | 8.988 | -3.705 | 0.002 | 0.007 | -1.922 |
| Rcbtb2    | 1.399  | 7.035 | 3.704  | 0.002 | 0.007 | -1.925 |
| Supt6h    | 1.071  | 6.127 | 3.702  | 0.002 | 0.007 | -1.928 |
| Naip5     | 1.163  | 4.497 | 3.700  | 0.002 | 0.007 | -1.932 |
| Arhgef10l | 1.092  | 4.826 | 3.699  | 0.002 | 0.007 | -1.934 |
| Itgb8     | 1.358  | 4.019 | 3.698  | 0.002 | 0.007 | -1.937 |
| Ppmle     | -1.014 | 2.837 | -3.698 | 0.002 | 0.007 | -1.937 |
| Mapk13    | -1.937 | 7.785 | -3.696 | 0.002 | 0.007 | -1.941 |
| Lanc13    | 1.522  | 4.146 | 3.695  | 0.002 | 0.007 | -1.943 |
| Ugt2a3    | -1.338 | 3.188 | -3.695 | 0.002 | 0.007 | -1.943 |
| Pdzd2     | -1.191 | 4.187 | -3.695 | 0.002 | 0.007 | -1.944 |
| Ddx19b    | 1.121  | 5.620 | 3.695  | 0.002 | 0.007 | -1.944 |
| Et14      | 1.227  | 7.521 | 3.692  | 0.002 | 0.007 | -1.950 |
| Kirrel3   | 1.758  | 4.245 | 3.692  | 0.002 | 0.007 | -1.951 |
| Trim12    | 1.261  | 4.163 | 3.692  | 0.002 | 0.007 | -1.951 |
| 4933436E2 | -1.037 | 2.962 | -3.691 | 0.002 | 0.007 | -1.952 |
| Pde9a     | 1.327  | 3.786 | 3.691  | 0.002 | 0.007 | -1.954 |
| A230065C2 | -1.040 | 3.591 | -3.689 | 0.002 | 0.007 | -1.957 |
| Ap3b1     | 1.440  | 8.206 | 3.687  | 0.002 | 0.007 | -1.961 |
| 0610031J  | 1.491  | 8.695 | 3.686  | 0.002 | 0.007 | -1.965 |
| Gpr56     | -1.122 | 4.490 | -3.685 | 0.002 | 0.007 | -1.967 |
| Zmynd19   | 1.134  | 6.241 | 3.682  | 0.002 | 0.007 | -1.973 |
| LOC552909 | 1.167  | 5.877 | 3.678  | 0.002 | 0.007 | -1.981 |
| Sec16b    | -1.887 | 5.959 | -3.677 | 0.002 | 0.007 | -1.984 |
| Pacsin3   | 1.128  | 5.744 | 3.676  | 0.002 | 0.007 | -1.986 |
| Scamp5    | -1.173 | 4.843 | -3.676 | 0.002 | 0.007 | -1.986 |
| Dock11    | 1.869  | 7.889 | 3.675  | 0.002 | 0.007 | -1.988 |
| Stard6    | 1.056  | 3.583 | 3.672  | 0.002 | 0.007 | -1.995 |
| Kcnel     | -2.256 | 3.291 | -3.672 | 0.002 | 0.007 | -1.995 |
| Pate4     | -1.653 | 3.132 | -3.671 | 0.002 | 0.007 | -1.996 |
| D830012I2 | 1.741  | 7.537 | 3.671  | 0.002 | 0.007 | -1.997 |
| Gja5      | 1.070  | 3.724 | 3.670  | 0.002 | 0.007 | -1.999 |
| Slc9a4    | -1.286 | 3.420 | -3.669 | 0.002 | 0.007 | -2.002 |
| Tubg1     | 1.154  | 6.458 | 3.668  | 0.002 | 0.007 | -2.004 |
| Mylip     | 1.536  | 6.904 | 3.668  | 0.002 | 0.007 | -2.004 |
| 8430427H1 | 1.922  | 6.161 | 3.668  | 0.002 | 0.007 | -2.005 |
| Efnal     | 2.084  | 6.992 | 3.667  | 0.002 | 0.007 | -2.005 |
| Fus       | 1.841  | 8.790 | 3.667  | 0.002 | 0.007 | -2.006 |

|           |        |       |        |       |       |        |
|-----------|--------|-------|--------|-------|-------|--------|
| Narf      | 1.038  | 5.277 | 3.666  | 0.002 | 0.007 | -2.008 |
| Klraq1    | 1.393  | 7.358 | 3.664  | 0.002 | 0.007 | -2.013 |
| Sdr42e1   | -1.559 | 5.255 | -3.663 | 0.002 | 0.007 | -2.014 |
| 2810055F1 | 1.150  | 3.984 | 3.663  | 0.002 | 0.007 | -2.015 |
| Ppp2r5e   | 1.237  | 6.912 | 3.663  | 0.002 | 0.007 | -2.015 |
| Klrc1     | 1.276  | 3.307 | 3.662  | 0.002 | 0.007 | -2.016 |
| Ppargc1a  | -1.724 | 4.095 | -3.662 | 0.002 | 0.007 | -2.017 |
| 2210415F1 | -4.956 | 6.318 | -3.661 | 0.002 | 0.007 | -2.020 |
| Adm       | 2.091  | 6.145 | 3.660  | 0.002 | 0.007 | -2.021 |
| Cdk14     | 1.844  | 6.785 | 3.658  | 0.002 | 0.007 | -2.025 |
| Bcl2l14   | -1.940 | 5.654 | -3.658 | 0.002 | 0.007 | -2.026 |
| Gm16515   | 1.017  | 6.545 | 3.658  | 0.002 | 0.007 | -2.027 |
| Foxa1     | -2.405 | 9.226 | -3.657 | 0.002 | 0.007 | -2.028 |
| Ndufaf3   | -1.241 | 6.916 | -3.656 | 0.002 | 0.007 | -2.030 |
| P4ha2     | 2.112  | 7.616 | 3.654  | 0.002 | 0.007 | -2.035 |
| Cog4      | 1.406  | 6.657 | 3.653  | 0.002 | 0.007 | -2.037 |
| Fam40b    | -1.298 | 2.769 | -3.652 | 0.002 | 0.007 | -2.040 |
| Snrpb2    | 1.211  | 8.892 | 3.651  | 0.002 | 0.007 | -2.042 |
| Ggal      | 1.015  | 5.839 | 3.651  | 0.002 | 0.007 | -2.042 |
| Zfp512    | 1.175  | 6.983 | 3.650  | 0.002 | 0.007 | -2.044 |
| BC016579  | -2.010 | 4.288 | -3.648 | 0.002 | 0.007 | -2.047 |
| Vamp4     | 1.367  | 7.751 | 3.648  | 0.002 | 0.007 | -2.049 |
| A430102J1 | 1.196  | 7.000 | 3.648  | 0.002 | 0.008 | -2.049 |
| Slc35e2   | 1.290  | 6.971 | 3.646  | 0.002 | 0.008 | -2.053 |
| Pcdhb9    | 1.794  | 3.725 | 3.646  | 0.002 | 0.008 | -2.053 |
| Slpr5     | -1.381 | 3.115 | -3.646 | 0.002 | 0.008 | -2.054 |
| Rbm18     | 1.100  | 4.978 | 3.644  | 0.002 | 0.008 | -2.056 |
| Fam183b   | -1.461 | 3.168 | -3.644 | 0.002 | 0.008 | -2.056 |
| Lgals7    | -2.429 | 4.742 | -3.644 | 0.002 | 0.008 | -2.057 |
| LOC100044 | -1.038 | 2.760 | -3.644 | 0.002 | 0.008 | -2.058 |
| Angpt12   | 1.806  | 4.756 | 3.643  | 0.002 | 0.008 | -2.059 |
| Erc2      | 1.738  | 4.070 | 3.643  | 0.002 | 0.008 | -2.059 |
| Mthfd1    | -1.150 | 7.757 | -3.643 | 0.002 | 0.008 | -2.060 |
| D8Ertd82e | 1.433  | 7.764 | 3.642  | 0.002 | 0.008 | -2.061 |
| Ear3      | 1.760  | 4.191 | 3.642  | 0.002 | 0.008 | -2.062 |
| Sycn      | -2.657 | 4.143 | -3.641 | 0.002 | 0.008 | -2.063 |
| D2Ertd93e | 1.052  | 5.675 | 3.641  | 0.002 | 0.008 | -2.064 |
| Med21     | 1.507  | 7.317 | 3.641  | 0.002 | 0.008 | -2.065 |
| LOC676654 | 1.334  | 5.320 | 3.640  | 0.002 | 0.008 | -2.065 |
| D10627    | 1.154  | 4.826 | 3.640  | 0.002 | 0.008 | -2.066 |
| Stard9    | 1.046  | 4.281 | 3.640  | 0.002 | 0.008 | -2.066 |
| Chsy3     | 1.323  | 3.511 | 3.638  | 0.002 | 0.008 | -2.071 |
| Krt6b     | -3.203 | 3.723 | -3.638 | 0.002 | 0.008 | -2.071 |
| Cd74      | 2.034  | 7.761 | 3.636  | 0.002 | 0.008 | -2.074 |
| Sephs2    | -1.299 | 7.670 | -3.636 | 0.002 | 0.008 | -2.075 |
| Rad1      | 1.268  | 5.004 | 3.636  | 0.002 | 0.008 | -2.076 |
| A21d1     | -1.514 | 7.351 | -3.635 | 0.002 | 0.008 | -2.077 |
| Wsb2      | 1.405  | 6.872 | 3.632  | 0.002 | 0.008 | -2.085 |
| Rnf152    | -1.828 | 7.275 | -3.631 | 0.002 | 0.008 | -2.085 |
| D330028D1 | -1.319 | 5.256 | -3.631 | 0.002 | 0.008 | -2.086 |

|           |        |        |        |       |       |        |
|-----------|--------|--------|--------|-------|-------|--------|
| Pisd-ps3  | -1.599 | 5.744  | -3.630 | 0.002 | 0.008 | -2.088 |
| I118      | -1.459 | 8.877  | -3.630 | 0.002 | 0.008 | -2.088 |
| D330040H1 | 1.508  | 6.353  | 3.630  | 0.002 | 0.008 | -2.088 |
| Tmprss4   | -2.825 | 7.004  | -3.629 | 0.002 | 0.008 | -2.091 |
| Efcab4a   | -1.198 | 6.761  | -3.628 | 0.002 | 0.008 | -2.092 |
| Exph5     | -2.556 | 5.513  | -3.628 | 0.002 | 0.008 | -2.092 |
| Cct8      | 1.189  | 9.282  | 3.628  | 0.002 | 0.008 | -2.093 |
| Chid1     | -1.172 | 5.075  | -3.628 | 0.002 | 0.008 | -2.093 |
| Gnl3      | 1.035  | 8.494  | 3.627  | 0.002 | 0.008 | -2.094 |
| Oxr1      | 1.757  | 8.856  | 3.626  | 0.002 | 0.008 | -2.096 |
| Cyp4b1    | 1.332  | 4.997  | 3.626  | 0.002 | 0.008 | -2.096 |
| Nsmce2    | 1.066  | 7.761  | 3.626  | 0.002 | 0.008 | -2.098 |
| Ncoa1     | -1.051 | 6.233  | -3.625 | 0.002 | 0.008 | -2.099 |
| Fscn2     | -1.050 | 3.332  | -3.625 | 0.002 | 0.008 | -2.099 |
| Stam      | 1.082  | 7.917  | 3.625  | 0.002 | 0.008 | -2.099 |
| Coro1c    | 1.236  | 4.472  | 3.624  | 0.002 | 0.008 | -2.102 |
| Cntln     | 1.649  | 4.726  | 3.624  | 0.002 | 0.008 | -2.102 |
| 2610039C1 | 1.782  | 6.502  | 3.623  | 0.002 | 0.008 | -2.104 |
| Dpep1     | 1.091  | 4.042  | 3.622  | 0.002 | 0.008 | -2.106 |
| Slpi      | 2.549  | 7.347  | 3.622  | 0.002 | 0.008 | -2.106 |
| AU021977  | -1.014 | 2.963  | -3.621 | 0.002 | 0.008 | -2.108 |
| Eeal      | 1.640  | 6.868  | 3.620  | 0.002 | 0.008 | -2.109 |
| Ms11      | 1.014  | 7.025  | 3.620  | 0.002 | 0.008 | -2.110 |
| Pfkfb3    | 1.545  | 6.482  | 3.620  | 0.002 | 0.008 | -2.111 |
| 2010317E2 | -1.165 | 3.930  | -3.620 | 0.002 | 0.008 | -2.111 |
| Bst2      | 1.698  | 6.076  | 3.620  | 0.002 | 0.008 | -2.111 |
| Gyg       | 1.193  | 7.172  | 3.619  | 0.002 | 0.008 | -2.113 |
| 311004302 | 1.378  | 6.712  | 3.618  | 0.002 | 0.008 | -2.115 |
| Zc4h2     | 1.053  | 3.877  | 3.617  | 0.002 | 0.008 | -2.117 |
| Ppmlb     | 1.787  | 7.300  | 3.614  | 0.002 | 0.008 | -2.124 |
| Rrp8      | 1.019  | 5.916  | 3.612  | 0.002 | 0.008 | -2.128 |
| Cpamd8    | -2.508 | 3.817  | -3.609 | 0.002 | 0.008 | -2.134 |
| Ccl8      | 2.908  | 5.948  | 3.609  | 0.002 | 0.008 | -2.134 |
| Nop16     | 1.251  | 7.620  | 3.609  | 0.002 | 0.008 | -2.135 |
| Fam49b    | 1.634  | 9.033  | 3.608  | 0.002 | 0.008 | -2.136 |
| AI451617  | 1.578  | 4.257  | 3.604  | 0.002 | 0.008 | -2.146 |
| Stmn2     | 1.637  | 4.220  | 3.603  | 0.002 | 0.008 | -2.148 |
| Cdh6      | 1.964  | 4.185  | 3.602  | 0.002 | 0.008 | -2.151 |
| Abcc4     | 1.948  | 7.656  | 3.601  | 0.002 | 0.008 | -2.153 |
| Hmgcl     | -1.195 | 7.841  | -3.600 | 0.002 | 0.008 | -2.154 |
| Scnn1a    | -1.415 | 4.973  | -3.600 | 0.002 | 0.008 | -2.155 |
| Csta      | -1.562 | 2.941  | -3.599 | 0.002 | 0.008 | -2.157 |
| Wdr34     | 1.110  | 4.838  | 3.599  | 0.002 | 0.008 | -2.157 |
| Ipo8      | 1.196  | 8.990  | 3.598  | 0.002 | 0.008 | -2.159 |
| 1700025G1 | 2.010  | 6.031  | 3.596  | 0.002 | 0.008 | -2.164 |
| Orc6l     | 1.013  | 7.185  | 3.596  | 0.002 | 0.008 | -2.164 |
| Cebpd     | 2.056  | 7.989  | 3.596  | 0.002 | 0.008 | -2.164 |
| 15-Sep    | 1.571  | 10.962 | 3.595  | 0.002 | 0.008 | -2.165 |
| Dpysl2    | 1.189  | 9.581  | 3.595  | 0.002 | 0.008 | -2.167 |
| Liph      | -1.368 | 3.827  | -3.594 | 0.002 | 0.008 | -2.169 |

|           |        |        |        |       |       |        |
|-----------|--------|--------|--------|-------|-------|--------|
| Zfp292    | 1.031  | 5.617  | 3.591  | 0.002 | 0.008 | -2.174 |
| 4933423L1 | -1.038 | 3.159  | -3.591 | 0.002 | 0.008 | -2.174 |
| Tspo      | 1.714  | 10.070 | 3.591  | 0.002 | 0.008 | -2.175 |
| Dl11      | 1.614  | 5.040  | 3.586  | 0.002 | 0.008 | -2.185 |
| Trim30    | 1.887  | 5.494  | 3.583  | 0.002 | 0.008 | -2.192 |
| AI504432  | 1.489  | 4.722  | 3.582  | 0.002 | 0.008 | -2.194 |
| Tmem168   | 1.587  | 5.614  | 3.580  | 0.002 | 0.008 | -2.199 |
| Ttc27     | 1.171  | 6.206  | 3.579  | 0.002 | 0.008 | -2.202 |
| Mmp10     | 2.507  | 5.212  | 3.578  | 0.002 | 0.008 | -2.204 |
| Serinc1   | 2.094  | 8.927  | 3.577  | 0.002 | 0.008 | -2.205 |
| Osr1      | 1.905  | 4.514  | 3.577  | 0.002 | 0.008 | -2.205 |
| Glod5     | -2.511 | 5.831  | -3.576 | 0.002 | 0.008 | -2.207 |
| Tff2      | -5.592 | 9.922  | -3.575 | 0.002 | 0.008 | -2.209 |
| Tgs1      | 1.374  | 6.995  | 3.574  | 0.002 | 0.008 | -2.211 |
| Rnf2      | 1.519  | 7.686  | 3.571  | 0.002 | 0.008 | -2.219 |
| Cadps2    | -2.529 | 5.362  | -3.569 | 0.002 | 0.008 | -2.224 |
| Polr2d    | 1.036  | 7.396  | 3.568  | 0.002 | 0.008 | -2.225 |
| 2610005LC | 1.287  | 5.695  | 3.568  | 0.002 | 0.008 | -2.226 |
| Cb111     | 1.116  | 6.237  | 3.567  | 0.002 | 0.008 | -2.228 |
| Spata6    | 1.270  | 5.280  | 3.566  | 0.002 | 0.009 | -2.230 |
| Clcn3     | -1.286 | 8.463  | -3.566 | 0.002 | 0.009 | -2.231 |
| Cpox      | -1.283 | 6.189  | -3.563 | 0.002 | 0.009 | -2.237 |
| Ankrd43   | -1.341 | 3.021  | -3.560 | 0.002 | 0.009 | -2.243 |
| Wdr63     | -1.138 | 2.874  | -3.560 | 0.002 | 0.009 | -2.243 |
| Galnt6    | -1.422 | 3.931  | -3.559 | 0.002 | 0.009 | -2.244 |
| Cnn3      | 1.149  | 10.097 | 3.559  | 0.002 | 0.009 | -2.245 |
| Morf411   | 1.616  | 10.618 | 3.558  | 0.002 | 0.009 | -2.246 |
| Prom1     | -3.069 | 9.035  | -3.558 | 0.002 | 0.009 | -2.247 |
| Cd48      | 1.511  | 4.243  | 3.557  | 0.002 | 0.009 | -2.249 |
| Tagap     | 1.144  | 6.648  | 3.557  | 0.002 | 0.009 | -2.249 |
| Ets2      | 1.478  | 8.419  | 3.556  | 0.002 | 0.009 | -2.252 |
| Tex15     | -1.867 | 3.223  | -3.555 | 0.002 | 0.009 | -2.253 |
| Nmnat1    | -1.115 | 4.297  | -3.555 | 0.002 | 0.009 | -2.253 |
| Cd97      | 1.284  | 7.757  | 3.554  | 0.002 | 0.009 | -2.256 |
| 5330417C2 | -2.645 | 6.148  | -3.553 | 0.002 | 0.009 | -2.259 |
| Cd44      | 2.404  | 10.617 | 3.552  | 0.002 | 0.009 | -2.260 |
| Prdx6     | 1.360  | 10.006 | 3.551  | 0.002 | 0.009 | -2.263 |
| Pycard    | -1.533 | 8.670  | -3.549 | 0.002 | 0.009 | -2.267 |
| Fam64a    | 1.684  | 4.819  | 3.548  | 0.002 | 0.009 | -2.270 |
| Fem1b     | 1.204  | 4.832  | 3.548  | 0.002 | 0.009 | -2.270 |
| Prpf4     | 1.046  | 5.971  | 3.547  | 0.002 | 0.009 | -2.271 |
| Eif2c2    | 1.224  | 7.488  | 3.546  | 0.002 | 0.009 | -2.273 |
| Ywhaq     | 1.384  | 10.762 | 3.545  | 0.002 | 0.009 | -2.275 |
| Cbfa2t2   | 1.067  | 6.932  | 3.544  | 0.002 | 0.009 | -2.277 |
| Plrg1     | 1.851  | 7.954  | 3.544  | 0.002 | 0.009 | -2.277 |
| Esml      | 1.845  | 5.054  | 3.544  | 0.002 | 0.009 | -2.278 |
| Cadm4     | 1.272  | 5.225  | 3.544  | 0.002 | 0.009 | -2.279 |
| Zbtb7c    | -1.035 | 3.312  | -3.542 | 0.002 | 0.009 | -2.283 |
| Mtpn      | 1.052  | 6.602  | 3.542  | 0.002 | 0.009 | -2.283 |
| Eif5b     | 1.313  | 7.374  | 3.540  | 0.002 | 0.009 | -2.287 |

|           |        |        |        |       |       |        |
|-----------|--------|--------|--------|-------|-------|--------|
| Mobk11b   | 1.322  | 8.927  | 3.538  | 0.002 | 0.009 | -2.291 |
| 4930428BC | 1.008  | 3.531  | 3.537  | 0.002 | 0.009 | -2.294 |
| Gtpbp4    | 1.254  | 6.385  | 3.537  | 0.002 | 0.009 | -2.295 |
| 6030405A1 | -1.115 | 3.044  | -3.535 | 0.002 | 0.009 | -2.298 |
| LOC100046 | 1.342  | 9.580  | 3.534  | 0.002 | 0.009 | -2.300 |
| Slc39a10  | 1.416  | 8.502  | 3.533  | 0.002 | 0.009 | -2.303 |
| Gkn1      | -5.243 | 9.414  | -3.529 | 0.002 | 0.009 | -2.311 |
| Tjpl      | 1.471  | 9.624  | 3.529  | 0.002 | 0.009 | -2.312 |
| Gchfr     | 1.087  | 4.499  | 3.528  | 0.002 | 0.009 | -2.313 |
| Ube2e3    | 1.334  | 9.415  | 3.528  | 0.002 | 0.009 | -2.313 |
| Galnt12   | -1.968 | 7.679  | -3.527 | 0.002 | 0.009 | -2.316 |
| Plscr2    | 2.453  | 4.489  | 3.526  | 0.002 | 0.009 | -2.317 |
| 2510017J1 | 1.919  | 5.157  | 3.525  | 0.002 | 0.009 | -2.320 |
| Scoc      | 1.329  | 7.017  | 3.525  | 0.002 | 0.009 | -2.321 |
| Gabrp     | 2.826  | 5.668  | 3.525  | 0.002 | 0.009 | -2.321 |
| Rap1b     | 1.810  | 9.220  | 3.525  | 0.002 | 0.009 | -2.321 |
| Igf1      | 1.812  | 5.249  | 3.524  | 0.002 | 0.009 | -2.323 |
| Slc30a4   | 1.659  | 8.520  | 3.523  | 0.002 | 0.009 | -2.325 |
| Tnfrsf1b  | 1.064  | 6.513  | 3.523  | 0.002 | 0.009 | -2.325 |
| Rab32     | 1.678  | 5.322  | 3.522  | 0.002 | 0.009 | -2.327 |
| Zfp383    | 1.095  | 5.175  | 3.521  | 0.002 | 0.009 | -2.330 |
| Sh3bgr1   | 1.579  | 7.961  | 3.519  | 0.002 | 0.009 | -2.332 |
| 3110001I2 | 1.223  | 5.201  | 3.519  | 0.002 | 0.009 | -2.333 |
| Gtf2ird1  | 1.340  | 7.619  | 3.517  | 0.002 | 0.009 | -2.338 |
| Ube2w     | 1.301  | 7.971  | 3.515  | 0.002 | 0.009 | -2.342 |
| Gas1      | 1.341  | 7.264  | 3.514  | 0.002 | 0.009 | -2.344 |
| Clic1     | 1.201  | 10.457 | 3.512  | 0.002 | 0.009 | -2.350 |
| Smad7     | 1.190  | 6.922  | 3.511  | 0.002 | 0.009 | -2.350 |
| Alkbh7    | -1.004 | 6.990  | -3.510 | 0.002 | 0.009 | -2.353 |
| Rpp25     | -1.224 | 4.251  | -3.508 | 0.002 | 0.009 | -2.359 |
| Yeats4    | 1.055  | 7.595  | 3.507  | 0.002 | 0.009 | -2.359 |
| Naa15     | 1.108  | 8.767  | 3.507  | 0.002 | 0.009 | -2.359 |
| Cirh1a    | 1.458  | 7.651  | 3.507  | 0.002 | 0.009 | -2.360 |
| Spc24     | -1.397 | 5.612  | -3.507 | 0.002 | 0.009 | -2.360 |
| Atp8a1    | 1.649  | 6.497  | 3.506  | 0.002 | 0.009 | -2.361 |
| Crat      | -1.018 | 6.417  | -3.505 | 0.002 | 0.009 | -2.363 |
| Cables2   | 1.477  | 6.305  | 3.504  | 0.002 | 0.009 | -2.367 |
| Fubp3     | 1.683  | 7.332  | 3.504  | 0.002 | 0.009 | -2.368 |
| 2210403KC | 1.709  | 8.017  | 3.503  | 0.002 | 0.009 | -2.368 |
| Bmil      | 1.614  | 7.944  | 3.501  | 0.002 | 0.009 | -2.374 |
| Jkamp     | 1.747  | 7.960  | 3.500  | 0.002 | 0.009 | -2.375 |
| Pde5a     | 1.280  | 3.892  | 3.499  | 0.002 | 0.009 | -2.377 |
| Dstyk     | 1.181  | 6.189  | 3.497  | 0.002 | 0.010 | -2.381 |
| Fabp2     | -3.563 | 5.594  | -3.497 | 0.002 | 0.010 | -2.381 |
| Pr13d1    | -1.059 | 2.836  | -3.496 | 0.003 | 0.010 | -2.385 |
| Tulp2     | -1.005 | 3.104  | -3.492 | 0.003 | 0.010 | -2.393 |
| Car12     | -2.242 | 5.021  | -3.490 | 0.003 | 0.010 | -2.397 |
| 3110082I1 | 1.073  | 6.049  | 3.487  | 0.003 | 0.010 | -2.403 |
| Aplar     | 1.130  | 8.357  | 3.486  | 0.003 | 0.010 | -2.407 |
| Nampt     | 1.554  | 6.886  | 3.485  | 0.003 | 0.010 | -2.408 |

|         |        |       |        |       |       |        |
|---------|--------|-------|--------|-------|-------|--------|
| Smagp   | -1.906 | 8.343 | -3.485 | 0.003 | 0.010 | -2.408 |
| Klf2    | 1.090  | 6.975 | 3.484  | 0.003 | 0.010 | -2.411 |
| DlErt62 | 1.382  | 6.823 | 3.483  | 0.003 | 0.010 | -2.412 |
| Fgf13   | 2.093  | 4.643 | 3.483  | 0.003 | 0.010 | -2.414 |
| Zcchc10 | 1.214  | 5.839 | 3.482  | 0.003 | 0.010 | -2.414 |
| Slc7a2  | 1.247  | 3.465 | 3.482  | 0.003 | 0.010 | -2.415 |
| Rarb    | 1.609  | 4.100 | 3.482  | 0.003 | 0.010 | -2.415 |
| Sh3gl2  | -2.529 | 5.364 | -3.481 | 0.003 | 0.010 | -2.417 |
| Sulf2   | 1.669  | 7.597 | 3.477  | 0.003 | 0.010 | -2.426 |
| Tmem213 | -2.497 | 4.906 | -3.476 | 0.003 | 0.010 | -2.429 |
| Trim41  | 1.155  | 7.044 | 3.474  | 0.003 | 0.010 | -2.433 |
| Def6    | 1.056  | 5.419 | 3.473  | 0.003 | 0.010 | -2.435 |
| Sfrs11  | 1.074  | 7.916 | 3.473  | 0.003 | 0.010 | -2.435 |
| Lims1   | 1.782  | 7.373 | 3.471  | 0.003 | 0.010 | -2.438 |
| Bace2   | -2.536 | 8.183 | -3.471 | 0.003 | 0.010 | -2.440 |
| Arf1    | 1.414  | 8.950 | 3.470  | 0.003 | 0.010 | -2.440 |
| Usp33   | 1.053  | 6.976 | 3.470  | 0.003 | 0.010 | -2.441 |
| Coq9    | -1.079 | 8.179 | -3.470 | 0.003 | 0.010 | -2.442 |
| Obfc1   | 1.379  | 6.565 | 3.469  | 0.003 | 0.010 | -2.442 |
| Snx12   | 1.021  | 6.181 | 3.468  | 0.003 | 0.010 | -2.446 |
| Msr2    | -1.082 | 5.358 | -3.467 | 0.003 | 0.010 | -2.448 |



**Table S4. Differential expression of genes in Local dataset2**

| Symbol        | logFC  | AveExpr | t       | P. Value | adj. P. Val | B     |
|---------------|--------|---------|---------|----------|-------------|-------|
| Enpp2         | -1.891 | 9.387   | -12.587 | 0.000    | 0.004       | 6.420 |
| Itgb3         | 0.774  | 9.181   | 9.943   | 0.000    | 0.019       | 4.956 |
| Pilrb1        | 0.732  | 6.780   | 9.111   | 0.000    | 0.027       | 4.368 |
| Vnn1          | 2.580  | 9.355   | 8.119   | 0.000    | 0.057       | 3.568 |
| Sphk1         | 1.050  | 8.125   | 7.789   | 0.000    | 0.059       | 3.276 |
| Pilra         | 0.815  | 7.420   | 7.490   | 0.000    | 0.059       | 2.998 |
| Ptov1         | -0.504 | 9.577   | -7.374  | 0.000    | 0.059       | 2.887 |
| Ptges         | 1.050  | 8.383   | 7.224   | 0.000    | 0.059       | 2.740 |
| Gpr65         | 0.786  | 7.524   | 7.171   | 0.000    | 0.059       | 2.688 |
| Tyrobp        | 1.020  | 8.364   | 7.109   | 0.000    | 0.059       | 2.625 |
| 2210021J22Rik | -0.652 | 8.443   | -7.049  | 0.000    | 0.059       | 2.565 |
| Cd84          | 0.767  | 8.092   | 7.046   | 0.000    | 0.059       | 2.562 |
| Gm6377        | 0.751  | 7.014   | 7.006   | 0.000    | 0.059       | 2.521 |
| Srgn          | 1.292  | 9.092   | 6.957   | 0.000    | 0.059       | 2.471 |
| Cd300a        | 0.595  | 8.048   | 6.918   | 0.000    | 0.059       | 2.431 |
| Stra6         | 0.451  | 6.577   | 6.892   | 0.000    | 0.059       | 2.404 |
| Fgd3          | 1.489  | 8.138   | 6.707   | 0.000    | 0.069       | 2.210 |
| Pik3cd        | 0.676  | 7.765   | 6.607   | 0.000    | 0.070       | 2.102 |
| Jmjd1c        | 0.614  | 11.464  | 6.543   | 0.000    | 0.070       | 2.032 |
| Rhbdf2        | 0.481  | 8.657   | 6.533   | 0.000    | 0.070       | 2.022 |
| Lnx2          | -0.813 | 10.226  | -6.504  | 0.000    | 0.070       | 1.990 |
| Prl2c2        | 0.958  | 6.830   | 6.474   | 0.000    | 0.070       | 1.957 |
| Ptprc         | 1.349  | 9.725   | 6.358   | 0.000    | 0.070       | 1.828 |
| Slc39a11      | -0.733 | 12.320  | -6.357  | 0.000    | 0.070       | 1.827 |
| St8sia4       | 0.839  | 8.243   | 6.350   | 0.000    | 0.070       | 1.819 |
| Cd33          | 0.869  | 7.734   | 6.322   | 0.000    | 0.070       | 1.788 |
| Tubb2b        | 0.812  | 8.315   | 6.274   | 0.000    | 0.070       | 1.734 |
| Gcnt2         | 1.313  | 9.757   | 6.263   | 0.000    | 0.070       | 1.721 |
| Slitrk3       | -0.467 | 6.616   | -6.178  | 0.000    | 0.070       | 1.624 |
| Mpeg1         | 1.369  | 10.491  | 6.177   | 0.000    | 0.070       | 1.623 |
| Itgb2         | 1.327  | 8.403   | 6.156   | 0.000    | 0.070       | 1.599 |
| Tnfsf13       | 0.790  | 8.420   | 6.122   | 0.000    | 0.070       | 1.560 |
| Csf2rb        | 0.958  | 8.221   | 6.117   | 0.000    | 0.070       | 1.553 |
| Otop2         | 1.120  | 7.005   | 6.102   | 0.000    | 0.070       | 1.536 |
| Samsn1        | 0.723  | 7.642   | 6.096   | 0.000    | 0.070       | 1.529 |
| Adamts12      | 0.901  | 7.680   | 6.093   | 0.000    | 0.070       | 1.526 |
| Pla2g7        | 1.171  | 9.501   | 6.075   | 0.000    | 0.070       | 1.504 |
| Clqc          | 0.985  | 9.396   | 6.072   | 0.000    | 0.070       | 1.501 |
| Glipr1        | 0.779  | 7.830   | 6.009   | 0.000    | 0.070       | 1.428 |
| Cybb          | 1.116  | 9.115   | 5.969   | 0.000    | 0.070       | 1.380 |
| Glipr2        | 0.880  | 8.386   | 5.939   | 0.000    | 0.070       | 1.345 |
| Gm11843       | 0.546  | 6.687   | 5.936   | 0.000    | 0.070       | 1.341 |
| Herpud1       | -1.248 | 11.942  | -5.936  | 0.000    | 0.070       | 1.340 |
| P2ry2         | 0.882  | 7.452   | 5.909   | 0.000    | 0.070       | 1.308 |
| Nqo2          | 0.499  | 9.759   | 5.905   | 0.000    | 0.070       | 1.304 |
| Dl11          | 0.910  | 8.260   | 5.877   | 0.000    | 0.070       | 1.270 |
| Cxcl16        | 0.981  | 9.947   | 5.873   | 0.000    | 0.070       | 1.265 |

|               |        |        |        |       |       |       |
|---------------|--------|--------|--------|-------|-------|-------|
| Plin2         | 1.459  | 10.505 | 5.869  | 0.000 | 0.070 | 1.261 |
| Serpib6b      | 0.724  | 7.614  | 5.864  | 0.000 | 0.070 | 1.255 |
| Plek          | 1.051  | 9.244  | 5.844  | 0.000 | 0.070 | 1.230 |
| Fam50a        | -0.432 | 10.302 | -5.842 | 0.000 | 0.070 | 1.228 |
| Gm14680       | 0.607  | 8.410  | 5.811  | 0.000 | 0.070 | 1.192 |
| Has2          | 0.780  | 7.438  | 5.802  | 0.000 | 0.070 | 1.180 |
| Myo1f         | 0.815  | 7.721  | 5.798  | 0.000 | 0.070 | 1.175 |
| Il2rg         | 0.733  | 7.759  | 5.758  | 0.000 | 0.070 | 1.127 |
| Il1rn         | 2.594  | 9.509  | 5.753  | 0.000 | 0.070 | 1.120 |
| Tnfrsf25      | -0.596 | 7.453  | -5.746 | 0.000 | 0.070 | 1.112 |
| Col6a3        | 0.939  | 10.642 | 5.734  | 0.000 | 0.070 | 1.098 |
| Zcchc5        | -0.889 | 7.054  | -5.734 | 0.000 | 0.070 | 1.097 |
| Lair1         | 0.790  | 7.701  | 5.712  | 0.000 | 0.070 | 1.070 |
| Rhobtb1       | -1.794 | 10.067 | -5.709 | 0.000 | 0.070 | 1.066 |
| Cd53          | 1.346  | 8.688  | 5.704  | 0.000 | 0.070 | 1.060 |
| Aldh1a3       | 3.373  | 10.033 | 5.683  | 0.000 | 0.070 | 1.035 |
| Gpx2          | 0.985  | 12.600 | 5.682  | 0.000 | 0.070 | 1.033 |
| 6430548M08Rik | -0.947 | 10.863 | -5.665 | 0.000 | 0.071 | 1.013 |
| Sell          | 1.118  | 7.273  | 5.651  | 0.000 | 0.071 | 0.995 |
| Msr1          | 1.534  | 8.311  | 5.642  | 0.000 | 0.071 | 0.984 |
| Edem1         | -0.391 | 12.071 | -5.623 | 0.000 | 0.071 | 0.961 |
| Cd68          | 0.554  | 8.025  | 5.606  | 0.000 | 0.071 | 0.939 |
| Lphn3         | 1.079  | 8.280  | 5.588  | 0.000 | 0.071 | 0.917 |
| Galnt11       | 0.506  | 10.344 | 5.566  | 0.000 | 0.071 | 0.890 |
| Prss35        | 1.215  | 7.769  | 5.544  | 0.000 | 0.071 | 0.863 |
| Ncf2          | 0.712  | 8.048  | 5.539  | 0.000 | 0.071 | 0.855 |
| Il10ra        | 0.547  | 7.688  | 5.523  | 0.000 | 0.071 | 0.835 |
| Arhgap25      | 0.628  | 7.628  | 5.521  | 0.000 | 0.071 | 0.833 |
| Fcgr1         | 0.650  | 7.519  | 5.506  | 0.000 | 0.071 | 0.814 |
| Npc1          | 0.614  | 9.848  | 5.499  | 0.000 | 0.071 | 0.805 |
| Dok2          | 0.614  | 7.596  | 5.497  | 0.000 | 0.071 | 0.802 |
| Adig          | -0.559 | 6.631  | -5.493 | 0.000 | 0.071 | 0.798 |
| AC090887.6    | 0.577  | 6.640  | 5.491  | 0.000 | 0.071 | 0.795 |
| Lcp2          | 0.730  | 8.019  | 5.488  | 0.000 | 0.071 | 0.791 |
| Aplnr         | 0.824  | 8.160  | 5.485  | 0.000 | 0.071 | 0.787 |
| Lrrc32        | 0.594  | 7.971  | 5.463  | 0.000 | 0.071 | 0.760 |
| Sybu          | -1.232 | 9.156  | -5.461 | 0.000 | 0.071 | 0.757 |
| Tnip3         | 1.468  | 7.700  | 5.461  | 0.000 | 0.071 | 0.757 |
| Csf3r         | 1.115  | 7.887  | 5.460  | 0.000 | 0.071 | 0.756 |
| Zeb2          | 0.600  | 9.899  | 5.436  | 0.000 | 0.073 | 0.725 |
| Timp4         | -0.645 | 6.952  | -5.408 | 0.000 | 0.074 | 0.689 |
| Cd3001d       | 0.868  | 7.570  | 5.406  | 0.000 | 0.074 | 0.687 |
| Fgf18         | -0.386 | 6.545  | -5.361 | 0.000 | 0.078 | 0.629 |
| Foxa3         | -1.192 | 10.874 | -5.352 | 0.000 | 0.078 | 0.618 |
| Cyth4         | 0.847  | 8.136  | 5.302  | 0.000 | 0.082 | 0.553 |
| Ets1          | 1.058  | 9.532  | 5.280  | 0.000 | 0.082 | 0.525 |
| Grhl3         | 0.979  | 7.266  | 5.279  | 0.000 | 0.082 | 0.524 |
| Ccdc142       | 0.444  | 7.723  | 5.275  | 0.000 | 0.082 | 0.518 |
| Sfpil         | 0.739  | 7.546  | 5.273  | 0.000 | 0.082 | 0.516 |
| S100a9        | 2.282  | 7.809  | 5.266  | 0.000 | 0.082 | 0.506 |

|               |        |        |        |       |       |       |
|---------------|--------|--------|--------|-------|-------|-------|
| BC055004      | 0.609  | 7.353  | 5.261  | 0.000 | 0.082 | 0.499 |
| Kcnmb1        | -0.745 | 8.521  | -5.257 | 0.000 | 0.082 | 0.495 |
| AI504432      | 0.505  | 7.190  | 5.237  | 0.000 | 0.083 | 0.469 |
| Ifi30         | -0.588 | 12.560 | -5.233 | 0.000 | 0.083 | 0.464 |
| Klhdc1        | -0.743 | 8.402  | -5.220 | 0.000 | 0.084 | 0.447 |
| Tfec          | 0.770  | 7.043  | 5.207  | 0.000 | 0.084 | 0.429 |
| Sox4          | 1.033  | 10.569 | 5.205  | 0.000 | 0.084 | 0.427 |
| Gstm5         | -0.408 | 9.888  | -5.195 | 0.000 | 0.085 | 0.413 |
| Fli1          | 0.537  | 8.119  | 5.172  | 0.000 | 0.087 | 0.382 |
| Cd93          | 1.157  | 9.364  | 5.162  | 0.000 | 0.087 | 0.370 |
| Trim30c       | 0.504  | 6.722  | 5.158  | 0.000 | 0.087 | 0.365 |
| Ncapd3        | 0.370  | 9.490  | 5.146  | 0.000 | 0.087 | 0.348 |
| Hsd11b2       | 0.667  | 7.419  | 5.136  | 0.000 | 0.087 | 0.336 |
| Hcls1         | 0.902  | 8.498  | 5.133  | 0.000 | 0.087 | 0.331 |
| Duoxa2        | 1.732  | 9.120  | 5.128  | 0.000 | 0.087 | 0.325 |
| Tfe3          | 0.460  | 9.826  | 5.122  | 0.000 | 0.087 | 0.317 |
| H47           | -0.489 | 11.453 | -5.121 | 0.000 | 0.087 | 0.315 |
| Serpina3g     | 0.901  | 7.588  | 5.109  | 0.000 | 0.087 | 0.299 |
| Laptm5        | 0.671  | 8.536  | 5.105  | 0.000 | 0.087 | 0.295 |
| Zdhhc15       | 1.009  | 8.497  | 5.083  | 0.000 | 0.089 | 0.265 |
| Pdelc         | -1.129 | 9.209  | -5.074 | 0.000 | 0.089 | 0.253 |
| Msn           | 0.909  | 10.801 | 5.067  | 0.000 | 0.089 | 0.243 |
| Tnfaip3       | 0.868  | 9.578  | 5.065  | 0.000 | 0.089 | 0.241 |
| Selplg        | 0.706  | 7.781  | 5.050  | 0.001 | 0.089 | 0.221 |
| Atp8b4        | 0.678  | 7.046  | 5.044  | 0.001 | 0.089 | 0.213 |
| Slc16a3       | 1.805  | 8.635  | 5.014  | 0.001 | 0.089 | 0.172 |
| Ltbp2         | 1.616  | 8.141  | 5.003  | 0.001 | 0.089 | 0.158 |
| Ccr1          | 1.042  | 8.161  | 5.002  | 0.001 | 0.089 | 0.157 |
| Pdgfrb        | 0.813  | 9.070  | 5.002  | 0.001 | 0.089 | 0.156 |
| Ccdc14        | 0.440  | 7.959  | 5.000  | 0.001 | 0.089 | 0.154 |
| Ttc38         | -0.780 | 9.872  | -5.000 | 0.001 | 0.089 | 0.153 |
| Gmfg          | -0.577 | 9.468  | -4.987 | 0.001 | 0.089 | 0.136 |
| Tgif1         | 0.600  | 9.450  | 4.985  | 0.001 | 0.089 | 0.133 |
| Corola        | 0.989  | 8.750  | 4.984  | 0.001 | 0.089 | 0.133 |
| Pcdhb16       | 0.729  | 7.684  | 4.984  | 0.001 | 0.089 | 0.132 |
| Bcl2alb       | 0.626  | 7.210  | 4.977  | 0.001 | 0.089 | 0.122 |
| Slc15a3       | 1.140  | 7.865  | 4.972  | 0.001 | 0.089 | 0.116 |
| Gm15325       | -0.641 | 6.829  | -4.967 | 0.001 | 0.089 | 0.109 |
| Gm10093       | 0.546  | 9.898  | 4.957  | 0.001 | 0.089 | 0.096 |
| Sulf2         | 0.990  | 11.175 | 4.955  | 0.001 | 0.089 | 0.093 |
| A330040F15Rik | 0.459  | 6.741  | 4.949  | 0.001 | 0.089 | 0.085 |
| Pip4k2c       | -0.484 | 11.487 | -4.948 | 0.001 | 0.089 | 0.083 |
| Fmn11         | 0.686  | 7.741  | 4.944  | 0.001 | 0.089 | 0.078 |
| Dyrk3         | 0.387  | 6.978  | 4.941  | 0.001 | 0.089 | 0.074 |
| Hebp1         | -1.052 | 8.909  | -4.940 | 0.001 | 0.089 | 0.072 |
| Slfn1         | 0.717  | 7.126  | 4.939  | 0.001 | 0.089 | 0.072 |
| Baspl         | 2.226  | 9.832  | 4.934  | 0.001 | 0.089 | 0.064 |
| Pdcd1         | 0.473  | 6.770  | 4.931  | 0.001 | 0.089 | 0.061 |
| Gm14681       | 0.342  | 10.033 | 4.929  | 0.001 | 0.089 | 0.058 |
| Gm6645        | -0.483 | 6.751  | -4.927 | 0.001 | 0.089 | 0.055 |

|               |        |        |        |       |       |        |
|---------------|--------|--------|--------|-------|-------|--------|
| Gbp9          | 0.423  | 8.278  | 4.920  | 0.001 | 0.089 | 0.045  |
| Efna3         | 0.490  | 7.138  | 4.907  | 0.001 | 0.089 | 0.027  |
| Col3a1        | 0.899  | 13.459 | 4.903  | 0.001 | 0.089 | 0.022  |
| Rab2b         | 0.725  | 8.564  | 4.902  | 0.001 | 0.089 | 0.021  |
| Itga4         | 0.784  | 8.824  | 4.890  | 0.001 | 0.089 | 0.004  |
| Tifab         | 0.815  | 7.819  | 4.888  | 0.001 | 0.089 | 0.001  |
| AC160985.6    | 0.601  | 6.760  | 4.884  | 0.001 | 0.089 | -0.003 |
| Nckap11       | 0.872  | 8.493  | 4.880  | 0.001 | 0.089 | -0.010 |
| RP24-170A20.3 | 0.449  | 7.707  | 4.876  | 0.001 | 0.089 | -0.015 |
| Adam8         | 1.322  | 7.985  | 4.872  | 0.001 | 0.089 | -0.020 |
| Fkbp2         | -0.443 | 11.068 | -4.872 | 0.001 | 0.089 | -0.021 |
| Gm12913       | -2.665 | 10.161 | -4.871 | 0.001 | 0.089 | -0.022 |
| Itgal         | 0.903  | 7.915  | 4.869  | 0.001 | 0.089 | -0.025 |
| Pmm1          | 1.050  | 9.385  | 4.867  | 0.001 | 0.089 | -0.028 |
| Dym           | -0.637 | 9.425  | -4.863 | 0.001 | 0.089 | -0.032 |
| Fut4          | -1.909 | 10.280 | -4.856 | 0.001 | 0.090 | -0.043 |
| Gpc4          | 0.975  | 10.000 | 4.848  | 0.001 | 0.090 | -0.053 |
| Col6a6        | -0.285 | 6.494  | -4.847 | 0.001 | 0.090 | -0.055 |
| Rcan2         | -1.124 | 7.503  | -4.839 | 0.001 | 0.091 | -0.066 |
| Spon2         | 0.805  | 9.124  | 4.832  | 0.001 | 0.091 | -0.075 |
| Zmynd15       | 0.752  | 7.695  | 4.831  | 0.001 | 0.091 | -0.077 |
| Hyal2         | 0.781  | 9.472  | 4.813  | 0.001 | 0.092 | -0.102 |
| Lct1          | -0.391 | 6.605  | -4.812 | 0.001 | 0.092 | -0.102 |
| Stab1         | 0.780  | 9.050  | 4.796  | 0.001 | 0.094 | -0.124 |
| Stard4        | 0.556  | 11.846 | 4.784  | 0.001 | 0.095 | -0.141 |
| Pgc           | -3.177 | 14.270 | -4.781 | 0.001 | 0.095 | -0.145 |
| Gpr176        | 0.684  | 7.227  | 4.776  | 0.001 | 0.095 | -0.152 |
| Gm12840       | 1.325  | 9.950  | 4.768  | 0.001 | 0.095 | -0.163 |
| Ipcef1        | 0.566  | 7.633  | 4.763  | 0.001 | 0.095 | -0.170 |
| Gm14461       | -0.356 | 6.558  | -4.761 | 0.001 | 0.095 | -0.173 |
| Spsb1         | 0.645  | 8.496  | 4.754  | 0.001 | 0.095 | -0.183 |
| Ddit3         | -0.582 | 9.918  | -4.750 | 0.001 | 0.095 | -0.189 |
| Ighv7-2       | 0.924  | 6.813  | 4.748  | 0.001 | 0.095 | -0.191 |
| Golga7        | -0.550 | 11.278 | -4.747 | 0.001 | 0.095 | -0.193 |
| Birc3         | 0.964  | 9.850  | 4.745  | 0.001 | 0.095 | -0.196 |
| Il27ra        | 0.440  | 7.186  | 4.742  | 0.001 | 0.095 | -0.199 |
| 9-Sep         | 0.546  | 10.747 | 4.740  | 0.001 | 0.095 | -0.203 |
| Btk           | 0.648  | 7.414  | 4.733  | 0.001 | 0.095 | -0.212 |
| Tnfrsf8       | 0.394  | 6.683  | 4.723  | 0.001 | 0.095 | -0.226 |
| 4930422G04Rik | 0.543  | 7.991  | 4.719  | 0.001 | 0.095 | -0.232 |
| Gpt2          | -1.478 | 10.639 | -4.718 | 0.001 | 0.095 | -0.234 |
| Hist1h4c      | 0.330  | 6.562  | 4.717  | 0.001 | 0.095 | -0.234 |
| Itgax         | 0.861  | 8.100  | 4.717  | 0.001 | 0.095 | -0.234 |
| Bmpr2         | 0.441  | 9.489  | 4.717  | 0.001 | 0.095 | -0.235 |
| Bex4          | -0.782 | 7.163  | -4.711 | 0.001 | 0.095 | -0.243 |
| Ecel1         | 0.481  | 11.277 | 4.699  | 0.001 | 0.096 | -0.260 |
| Eps8          | 1.256  | 12.157 | 4.693  | 0.001 | 0.096 | -0.268 |
| Gm14446       | 2.078  | 9.174  | 4.692  | 0.001 | 0.096 | -0.270 |
| Pilrb2        | 0.563  | 6.999  | 4.685  | 0.001 | 0.097 | -0.279 |
| Galnt11       | -0.420 | 7.067  | -4.679 | 0.001 | 0.097 | -0.288 |

|            |        |        |        |       |       |        |
|------------|--------|--------|--------|-------|-------|--------|
| Gm10574    | 0.293  | 6.498  | 4.657  | 0.001 | 0.100 | -0.319 |
| Ifitm1     | 1.138  | 8.337  | 4.638  | 0.001 | 0.102 | -0.345 |
| Card9      | 0.618  | 6.912  | 4.638  | 0.001 | 0.102 | -0.346 |
| Dnajb4     | -0.546 | 10.434 | -4.633 | 0.001 | 0.102 | -0.352 |
| Arhgap30   | 0.951  | 8.770  | 4.631  | 0.001 | 0.102 | -0.355 |
| Mlycd      | -0.383 | 9.705  | -4.629 | 0.001 | 0.102 | -0.358 |
| Cd59a      | -0.611 | 9.894  | -4.626 | 0.001 | 0.102 | -0.362 |
| Ptprn2     | -1.213 | 11.902 | -4.623 | 0.001 | 0.102 | -0.367 |
| Acpl2      | -1.386 | 8.995  | -4.616 | 0.001 | 0.102 | -0.376 |
| AI662270   | 0.861  | 7.682  | 4.615  | 0.001 | 0.102 | -0.378 |
| Gramd2     | 0.423  | 8.465  | 4.608  | 0.001 | 0.102 | -0.388 |
| Higd1a     | -0.850 | 9.993  | -4.606 | 0.001 | 0.102 | -0.391 |
| Spn        | 0.615  | 7.756  | 4.601  | 0.001 | 0.102 | -0.397 |
| Fscn2      | 0.370  | 6.536  | 4.599  | 0.001 | 0.102 | -0.400 |
| Thap11     | -0.318 | 9.180  | -4.592 | 0.001 | 0.103 | -0.410 |
| Gm12602    | -0.469 | 6.680  | -4.589 | 0.001 | 0.103 | -0.415 |
| Tmem125    | 0.410  | 8.817  | 4.586  | 0.001 | 0.103 | -0.419 |
| Cxcl5      | 2.603  | 8.343  | 4.576  | 0.001 | 0.104 | -0.433 |
| Sidt1      | -0.875 | 9.700  | -4.571 | 0.001 | 0.104 | -0.440 |
| Apaf1      | 0.770  | 9.723  | 4.567  | 0.001 | 0.104 | -0.446 |
| Gm10767    | -0.563 | 8.184  | -4.566 | 0.001 | 0.104 | -0.447 |
| Specc1     | 1.211  | 9.862  | 4.547  | 0.001 | 0.105 | -0.474 |
| Pld1       | 1.136  | 10.794 | 4.546  | 0.001 | 0.105 | -0.476 |
| H2-Aa      | 0.940  | 10.632 | 4.541  | 0.001 | 0.105 | -0.483 |
| Ptprj      | 0.384  | 10.706 | 4.540  | 0.001 | 0.105 | -0.485 |
| Dolk       | 0.517  | 9.003  | 4.539  | 0.001 | 0.105 | -0.486 |
| Bcl2a1d    | 0.686  | 7.167  | 4.536  | 0.001 | 0.105 | -0.489 |
| Endod1     | 1.588  | 10.008 | 4.534  | 0.001 | 0.105 | -0.492 |
| Tacr2      | -1.487 | 7.539  | -4.534 | 0.001 | 0.105 | -0.493 |
| Stard10    | -0.693 | 13.293 | -4.533 | 0.001 | 0.105 | -0.495 |
| Gif        | -3.943 | 10.506 | -4.529 | 0.001 | 0.105 | -0.500 |
| Ighv1-2    | 0.520  | 6.611  | 4.529  | 0.001 | 0.105 | -0.501 |
| Hspb11     | -0.459 | 8.075  | -4.523 | 0.001 | 0.105 | -0.508 |
| Tmem170b   | 0.376  | 9.798  | 4.521  | 0.001 | 0.105 | -0.511 |
| Xkr5       | 0.393  | 6.801  | 4.519  | 0.001 | 0.105 | -0.515 |
| Arid5b     | 0.572  | 9.021  | 4.508  | 0.001 | 0.106 | -0.530 |
| Syvn1      | -0.749 | 10.184 | -4.506 | 0.001 | 0.106 | -0.533 |
| Skap2      | 0.497  | 11.358 | 4.497  | 0.001 | 0.106 | -0.546 |
| Clec3b     | -0.941 | 7.987  | -4.492 | 0.001 | 0.106 | -0.552 |
| 4-Sep      | 0.688  | 9.013  | 4.492  | 0.001 | 0.106 | -0.553 |
| Sla        | 0.797  | 8.100  | 4.491  | 0.001 | 0.106 | -0.555 |
| Retnla     | -1.747 | 7.441  | -4.488 | 0.001 | 0.106 | -0.558 |
| Plekho2    | 0.505  | 8.374  | 4.487  | 0.001 | 0.106 | -0.560 |
| AC090843.3 | 1.544  | 7.244  | 4.487  | 0.001 | 0.106 | -0.561 |
| Tnfrsf11b  | 1.143  | 8.356  | 4.485  | 0.001 | 0.106 | -0.563 |
| Nid2       | 0.663  | 8.247  | 4.484  | 0.001 | 0.106 | -0.565 |
| Pole       | 0.841  | 8.864  | 4.481  | 0.001 | 0.106 | -0.569 |
| Cyp27a1    | 0.655  | 8.380  | 4.479  | 0.001 | 0.106 | -0.571 |
| Ncf1       | 0.950  | 8.356  | 4.479  | 0.001 | 0.106 | -0.572 |
| Pcdhb19    | 0.614  | 7.480  | 4.474  | 0.001 | 0.106 | -0.578 |

|            |        |        |        |       |       |        |
|------------|--------|--------|--------|-------|-------|--------|
| Cntnap4    | -0.814 | 7.036  | -4.473 | 0.001 | 0.106 | -0.580 |
| Ccr2       | 1.041  | 8.340  | 4.466  | 0.001 | 0.106 | -0.591 |
| Atf7ip     | 0.375  | 9.991  | 4.462  | 0.001 | 0.106 | -0.596 |
| Sbno2      | 0.720  | 10.096 | 4.462  | 0.001 | 0.106 | -0.596 |
| Dab2       | 0.643  | 9.018  | 4.458  | 0.001 | 0.106 | -0.602 |
| AC153855.3 | 1.051  | 6.995  | 4.455  | 0.001 | 0.106 | -0.606 |
| Banp       | -0.771 | 8.800  | -4.452 | 0.001 | 0.106 | -0.610 |
| Me2        | -2.004 | 12.401 | -4.451 | 0.001 | 0.106 | -0.611 |
| Gmds       | -0.429 | 13.712 | -4.442 | 0.001 | 0.108 | -0.625 |
| Fcer1g     | 0.683  | 7.916  | 4.437  | 0.001 | 0.108 | -0.632 |
| Prkg1      | -0.601 | 7.470  | -4.431 | 0.001 | 0.108 | -0.640 |
| Mpst       | -1.389 | 10.290 | -4.429 | 0.001 | 0.108 | -0.643 |
| Acacb      | -1.363 | 9.542  | -4.428 | 0.001 | 0.108 | -0.645 |
| Adss       | 0.519  | 12.427 | 4.428  | 0.001 | 0.108 | -0.645 |
| Mgat2      | -0.399 | 11.141 | -4.413 | 0.001 | 0.110 | -0.667 |
| Fat1       | 1.152  | 12.492 | 4.411  | 0.001 | 0.110 | -0.669 |
| Serpib9    | 0.657  | 8.747  | 4.403  | 0.001 | 0.111 | -0.681 |
| Gapt       | 0.534  | 7.107  | 4.400  | 0.001 | 0.111 | -0.685 |
| Fn1        | 0.977  | 11.900 | 4.393  | 0.001 | 0.111 | -0.695 |
| Pdlim2     | 0.667  | 8.496  | 4.392  | 0.001 | 0.111 | -0.697 |
| Gpr55      | 1.262  | 8.064  | 4.388  | 0.001 | 0.112 | -0.702 |
| AC073939.2 | 0.841  | 6.937  | 4.378  | 0.001 | 0.113 | -0.717 |
| Sele       | 1.049  | 7.126  | 4.374  | 0.001 | 0.113 | -0.724 |
| Slpi       | 1.508  | 8.342  | 4.370  | 0.001 | 0.113 | -0.729 |
| Hrh1       | 0.960  | 7.553  | 4.367  | 0.001 | 0.113 | -0.734 |
| Pcdhb17    | 0.600  | 7.763  | 4.364  | 0.001 | 0.113 | -0.738 |
| Cx3cr1     | 0.844  | 8.442  | 4.361  | 0.001 | 0.113 | -0.742 |
| Dmbt1      | 1.686  | 16.092 | 4.360  | 0.001 | 0.113 | -0.743 |
| Litaf      | 0.658  | 10.972 | 4.360  | 0.001 | 0.113 | -0.744 |
| Nfkbiz     | 1.125  | 11.329 | 4.359  | 0.001 | 0.113 | -0.744 |
| Fam25c     | -1.123 | 7.121  | -4.359 | 0.001 | 0.113 | -0.745 |
| Nhlrc1     | -1.067 | 8.186  | -4.352 | 0.001 | 0.113 | -0.754 |
| Brsk2      | -0.498 | 6.632  | -4.351 | 0.001 | 0.113 | -0.756 |
| Ndr4       | -1.618 | 9.186  | -4.343 | 0.001 | 0.114 | -0.768 |
| Tsg101     | -0.324 | 11.448 | -4.334 | 0.001 | 0.115 | -0.781 |
| Mrps14     | -0.414 | 9.824  | -4.332 | 0.001 | 0.115 | -0.783 |
| Gsg2       | 0.457  | 8.449  | 4.329  | 0.001 | 0.115 | -0.788 |
| Pla2g16    | -0.419 | 11.371 | -4.327 | 0.002 | 0.115 | -0.792 |
| Serpine1   | 1.671  | 8.819  | 4.316  | 0.002 | 0.116 | -0.807 |
| Kdmlb      | -0.952 | 10.545 | -4.315 | 0.002 | 0.116 | -0.808 |
| Klhl6      | 0.545  | 7.552  | 4.314  | 0.002 | 0.116 | -0.811 |
| Asap1      | 0.467  | 9.540  | 4.312  | 0.002 | 0.116 | -0.813 |
| Osm        | 0.815  | 6.862  | 4.310  | 0.002 | 0.116 | -0.816 |
| Mapk6      | 0.476  | 11.616 | 4.308  | 0.002 | 0.116 | -0.819 |
| Otop3      | 2.982  | 9.536  | 4.306  | 0.002 | 0.116 | -0.822 |
| Gm7224     | 0.922  | 7.354  | 4.305  | 0.002 | 0.116 | -0.823 |
| Serpib2    | 0.599  | 6.845  | 4.303  | 0.002 | 0.116 | -0.827 |
| Zfp72      | 0.412  | 7.576  | 4.302  | 0.002 | 0.116 | -0.828 |
| Stk39      | -0.692 | 11.652 | -4.300 | 0.002 | 0.116 | -0.830 |
| Eng        | 0.635  | 8.614  | 4.292  | 0.002 | 0.117 | -0.842 |

|               |        |        |        |       |       |        |
|---------------|--------|--------|--------|-------|-------|--------|
| Ufc1          | -0.355 | 11.267 | -4.292 | 0.002 | 0.117 | -0.842 |
| Tram1         | -0.602 | 12.982 | -4.291 | 0.002 | 0.117 | -0.845 |
| Gtf2ird1      | 0.379  | 10.018 | 4.278  | 0.002 | 0.118 | -0.864 |
| Mir5105       | -2.186 | 11.140 | -4.273 | 0.002 | 0.118 | -0.871 |
| Gm15816       | -0.885 | 9.170  | -4.272 | 0.002 | 0.118 | -0.871 |
| Apbb1ip       | 0.525  | 7.562  | 4.266  | 0.002 | 0.118 | -0.880 |
| Nrp1          | 0.514  | 10.183 | 4.266  | 0.002 | 0.118 | -0.881 |
| Mgst2         | -1.123 | 12.173 | -4.266 | 0.002 | 0.118 | -0.881 |
| Cp            | 1.437  | 9.404  | 4.265  | 0.002 | 0.118 | -0.882 |
| Itgam         | 1.022  | 8.485  | 4.260  | 0.002 | 0.118 | -0.890 |
| Mfsd7a        | -1.816 | 8.804  | -4.256 | 0.002 | 0.118 | -0.895 |
| C5ar1         | 0.609  | 7.609  | 4.255  | 0.002 | 0.118 | -0.897 |
| Clec4e        | 1.268  | 7.228  | 4.252  | 0.002 | 0.118 | -0.901 |
| Hist2h3c2     | -0.474 | 6.751  | -4.251 | 0.002 | 0.118 | -0.903 |
| Gm10074       | 0.353  | 7.077  | 4.248  | 0.002 | 0.118 | -0.908 |
| Ephb4         | 0.488  | 9.865  | 4.244  | 0.002 | 0.118 | -0.914 |
| Il4ra         | 1.046  | 10.984 | 4.240  | 0.002 | 0.118 | -0.918 |
| Fbxo9         | -0.339 | 10.943 | -4.239 | 0.002 | 0.118 | -0.920 |
| Tlr13         | 0.822  | 7.870  | 4.238  | 0.002 | 0.118 | -0.922 |
| Galns         | 0.682  | 8.855  | 4.237  | 0.002 | 0.118 | -0.924 |
| Rhoh          | 0.552  | 7.107  | 4.235  | 0.002 | 0.118 | -0.927 |
| Chi3l3        | 1.780  | 8.084  | 4.234  | 0.002 | 0.118 | -0.928 |
| 9130008F23Rik | 0.433  | 9.508  | 4.229  | 0.002 | 0.118 | -0.936 |
| Dgka          | 0.671  | 11.311 | 4.228  | 0.002 | 0.118 | -0.937 |
| Fcgr3         | 0.840  | 8.614  | 4.228  | 0.002 | 0.118 | -0.937 |
| A530064D06Rik | 0.530  | 6.695  | 4.225  | 0.002 | 0.118 | -0.940 |
| 1-Mar         | 0.507  | 7.813  | 4.225  | 0.002 | 0.118 | -0.941 |
| Ptgis         | -0.713 | 7.329  | -4.220 | 0.002 | 0.118 | -0.948 |
| Lamb1         | 0.600  | 10.695 | 4.219  | 0.002 | 0.118 | -0.949 |
| Mmp10         | 3.288  | 9.713  | 4.219  | 0.002 | 0.118 | -0.950 |
| Clqb          | 0.929  | 9.216  | 4.218  | 0.002 | 0.118 | -0.951 |
| Setx          | 0.334  | 10.821 | 4.216  | 0.002 | 0.118 | -0.954 |
| Emr1          | 0.623  | 8.624  | 4.212  | 0.002 | 0.118 | -0.960 |
| Inpp5d        | 0.460  | 8.345  | 4.212  | 0.002 | 0.118 | -0.960 |
| Ube2g2        | -0.492 | 10.476 | -4.211 | 0.002 | 0.118 | -0.961 |
| Gngt2         | 0.633  | 8.103  | 4.211  | 0.002 | 0.118 | -0.962 |
| Cd72          | 0.515  | 7.650  | 4.211  | 0.002 | 0.118 | -0.962 |
| Slc2a10       | -1.494 | 9.451  | -4.208 | 0.002 | 0.118 | -0.966 |
| Atp6v1e1      | -0.507 | 11.233 | -4.203 | 0.002 | 0.119 | -0.973 |
| Tmem173       | 1.019  | 8.836  | 4.202  | 0.002 | 0.119 | -0.974 |
| Lrrc66        | 0.818  | 9.953  | 4.197  | 0.002 | 0.119 | -0.982 |
| Prss22        | 1.310  | 7.254  | 4.197  | 0.002 | 0.119 | -0.983 |
| Ms4a7         | 0.607  | 8.179  | 4.195  | 0.002 | 0.119 | -0.985 |
| Smarcal1      | -0.599 | 8.057  | -4.194 | 0.002 | 0.119 | -0.986 |
| Rnf19a        | 0.369  | 10.754 | 4.194  | 0.002 | 0.119 | -0.987 |
| Gm3880        | -1.041 | 7.180  | -4.183 | 0.002 | 0.120 | -1.003 |
| Flrt2         | -0.419 | 7.760  | -4.181 | 0.002 | 0.120 | -1.006 |
| Duoxa1        | 0.861  | 7.668  | 4.177  | 0.002 | 0.120 | -1.012 |
| Grhl1         | -1.006 | 8.840  | -4.177 | 0.002 | 0.120 | -1.012 |
| Bfar          | -0.510 | 10.860 | -4.173 | 0.002 | 0.121 | -1.017 |

|               |        |        |        |       |       |        |
|---------------|--------|--------|--------|-------|-------|--------|
| Nfam1         | 0.586  | 7.340  | 4.170  | 0.002 | 0.121 | -1.023 |
| Pikfyve       | 0.416  | 9.552  | 4.170  | 0.002 | 0.121 | -1.023 |
| Dnajc4        | -0.328 | 8.850  | -4.159 | 0.002 | 0.122 | -1.038 |
| Cyp26b1       | 0.879  | 7.600  | 4.150  | 0.002 | 0.124 | -1.052 |
| Commd6        | -0.313 | 10.090 | -4.149 | 0.002 | 0.124 | -1.053 |
| Depdc5        | 0.335  | 9.156  | 4.147  | 0.002 | 0.124 | -1.056 |
| Ifi47         | 0.708  | 7.883  | 4.144  | 0.002 | 0.124 | -1.061 |
| Mefv          | 0.703  | 7.397  | 4.141  | 0.002 | 0.124 | -1.065 |
| 4930438A08Rik | -1.407 | 7.372  | -4.140 | 0.002 | 0.124 | -1.068 |
| Sorcs3        | -0.384 | 6.602  | -4.135 | 0.002 | 0.125 | -1.074 |
| Eif4e3        | 0.620  | 8.731  | 4.132  | 0.002 | 0.125 | -1.079 |
| Sec61b        | -0.287 | 10.467 | -4.127 | 0.002 | 0.125 | -1.087 |
| Ppp2r5e       | -0.409 | 10.430 | -4.126 | 0.002 | 0.125 | -1.088 |
| Ly86          | 0.616  | 7.516  | 4.125  | 0.002 | 0.125 | -1.090 |
| Gimap6        | 0.597  | 8.857  | 4.123  | 0.002 | 0.126 | -1.093 |
| Zc3h12a       | 1.008  | 9.229  | 4.119  | 0.002 | 0.126 | -1.098 |
| Gm10307       | 0.436  | 7.894  | 4.118  | 0.002 | 0.126 | -1.099 |
| Aoah          | 0.540  | 7.244  | 4.117  | 0.002 | 0.126 | -1.101 |
| Igkv4-61      | 0.689  | 6.696  | 4.115  | 0.002 | 0.126 | -1.104 |
| Bhlhe22       | 0.429  | 7.047  | 4.109  | 0.002 | 0.127 | -1.114 |
| Bpgm          | 0.716  | 11.206 | 4.107  | 0.002 | 0.127 | -1.116 |
| Dnajb14       | -0.421 | 10.847 | -4.103 | 0.002 | 0.127 | -1.121 |
| Sema3e        | -1.398 | 9.348  | -4.101 | 0.002 | 0.127 | -1.125 |
| Pcdhb9        | 1.198  | 7.903  | 4.100  | 0.002 | 0.127 | -1.127 |
| Gm8995        | 0.530  | 7.255  | 4.098  | 0.002 | 0.127 | -1.129 |
| Kcnj13        | -0.455 | 6.653  | -4.097 | 0.002 | 0.127 | -1.131 |
| Bmp1          | 0.548  | 8.877  | 4.096  | 0.002 | 0.127 | -1.133 |
| Rreb1         | 0.353  | 10.379 | 4.094  | 0.002 | 0.127 | -1.135 |
| Ccdc160       | 0.395  | 6.652  | 4.086  | 0.002 | 0.128 | -1.148 |
| Rgs3          | 0.491  | 9.185  | 4.085  | 0.002 | 0.128 | -1.149 |
| Brca2         | 0.605  | 8.401  | 4.083  | 0.002 | 0.128 | -1.152 |
| Bail          | -1.290 | 7.682  | -4.077 | 0.002 | 0.129 | -1.161 |
| Slc5a5        | -3.156 | 8.736  | -4.077 | 0.002 | 0.129 | -1.161 |
| Dmap1         | -0.308 | 8.935  | -4.076 | 0.002 | 0.129 | -1.163 |
| Rftnl         | 0.404  | 7.787  | 4.071  | 0.002 | 0.129 | -1.170 |
| Lrrc33        | 0.420  | 7.783  | 4.070  | 0.002 | 0.129 | -1.172 |
| 4921517L17Rik | -1.769 | 10.174 | -4.067 | 0.002 | 0.129 | -1.176 |
| Pick1         | -0.291 | 10.308 | -4.067 | 0.002 | 0.129 | -1.176 |
| Klhdc8b       | -0.656 | 7.927  | -4.063 | 0.002 | 0.129 | -1.182 |
| Pln           | -1.848 | 8.223  | -4.062 | 0.002 | 0.129 | -1.184 |
| Slc25a24      | 0.708  | 11.832 | 4.051  | 0.002 | 0.130 | -1.201 |
| Deptor        | -0.763 | 12.559 | -4.050 | 0.002 | 0.130 | -1.201 |
| Moxd1         | 0.557  | 7.744  | 4.050  | 0.002 | 0.130 | -1.201 |
| Stt3b         | -0.335 | 12.791 | -4.050 | 0.002 | 0.130 | -1.201 |
| Mmp9          | 1.213  | 8.020  | 4.050  | 0.002 | 0.130 | -1.202 |
| Brcal         | 0.502  | 8.981  | 4.048  | 0.002 | 0.130 | -1.204 |
| Gpr114        | 0.653  | 7.348  | 4.047  | 0.002 | 0.130 | -1.206 |
| Casp4         | 1.017  | 8.199  | 4.045  | 0.002 | 0.130 | -1.208 |
| Rps6kc1       | 0.460  | 8.635  | 4.045  | 0.002 | 0.130 | -1.209 |
| Xrn1          | 0.558  | 9.851  | 4.043  | 0.002 | 0.130 | -1.211 |



|               |        |        |        |       |       |        |
|---------------|--------|--------|--------|-------|-------|--------|
| Bcl2a1a       | 0.681  | 7.067  | 4.039  | 0.002 | 0.131 | -1.217 |
| Clec7a        | 1.262  | 8.501  | 4.035  | 0.002 | 0.131 | -1.223 |
| Fbxo34        | 0.383  | 9.844  | 4.035  | 0.002 | 0.131 | -1.224 |
| Nek4          | 0.445  | 9.010  | 4.033  | 0.002 | 0.131 | -1.227 |
| Samd1         | -0.526 | 9.355  | -4.031 | 0.002 | 0.131 | -1.230 |
| Traf1         | 0.621  | 7.359  | 4.030  | 0.002 | 0.131 | -1.231 |
| Mcm7          | 0.551  | 10.736 | 4.021  | 0.002 | 0.132 | -1.245 |
| Akap5         | -0.571 | 7.295  | -4.015 | 0.002 | 0.133 | -1.254 |
| Ddah1         | 0.702  | 7.680  | 4.011  | 0.002 | 0.134 | -1.260 |
| Rs1           | -0.463 | 6.711  | -4.007 | 0.003 | 0.134 | -1.266 |
| Kcna1         | -0.998 | 7.155  | -3.999 | 0.003 | 0.135 | -1.278 |
| Lars2         | -1.872 | 12.367 | -3.999 | 0.003 | 0.135 | -1.278 |
| Mmp14         | 1.160  | 10.268 | 3.998  | 0.003 | 0.135 | -1.279 |
| Gm12183       | 0.402  | 9.662  | 3.998  | 0.003 | 0.135 | -1.280 |
| Arhgap31      | 0.502  | 8.580  | 3.996  | 0.003 | 0.135 | -1.282 |
| Msc           | 0.422  | 6.995  | 3.994  | 0.003 | 0.135 | -1.285 |
| Trem12        | 0.439  | 6.791  | 3.994  | 0.003 | 0.135 | -1.286 |
| Ythdf1        | -0.401 | 10.518 | -3.992 | 0.003 | 0.135 | -1.289 |
| Lcn2          | 1.562  | 7.750  | 3.991  | 0.003 | 0.135 | -1.290 |
| Gstm1         | -1.435 | 11.595 | -3.991 | 0.003 | 0.135 | -1.291 |
| Slc26a10      | -0.949 | 8.011  | -3.990 | 0.003 | 0.135 | -1.291 |
| Zfp623        | -0.516 | 9.805  | -3.984 | 0.003 | 0.136 | -1.301 |
| Tnfsf11       | 0.622  | 7.012  | 3.981  | 0.003 | 0.136 | -1.305 |
| Trim15        | 1.816  | 8.593  | 3.975  | 0.003 | 0.137 | -1.315 |
| Capn9         | -2.494 | 9.982  | -3.971 | 0.003 | 0.137 | -1.320 |
| Gsdma2        | -4.593 | 11.802 | -3.970 | 0.003 | 0.137 | -1.322 |
| Tnfrsf26      | 0.542  | 7.099  | 3.969  | 0.003 | 0.137 | -1.323 |
| Clock         | 0.358  | 11.662 | 3.965  | 0.003 | 0.137 | -1.329 |
| Tpmt          | -1.011 | 9.259  | -3.965 | 0.003 | 0.137 | -1.329 |
| Ptchd1        | -0.622 | 6.832  | -3.964 | 0.003 | 0.137 | -1.331 |
| Ntn4          | -1.019 | 9.841  | -3.957 | 0.003 | 0.139 | -1.342 |
| ApoE          | 0.843  | 12.189 | 3.954  | 0.003 | 0.139 | -1.345 |
| Tmem119       | 0.838  | 8.326  | 3.952  | 0.003 | 0.139 | -1.348 |
| Ccr5          | 0.845  | 7.616  | 3.948  | 0.003 | 0.140 | -1.356 |
| Ifnar1        | 0.360  | 10.166 | 3.944  | 0.003 | 0.140 | -1.361 |
| Sh3glb2       | -0.726 | 10.371 | -3.939 | 0.003 | 0.141 | -1.369 |
| Abca1         | 0.874  | 9.800  | 3.938  | 0.003 | 0.141 | -1.370 |
| Gm12563       | -2.117 | 10.168 | -3.929 | 0.003 | 0.143 | -1.383 |
| Dlgap1        | -1.600 | 8.983  | -3.927 | 0.003 | 0.143 | -1.387 |
| Clec4n        | 1.118  | 8.389  | 3.926  | 0.003 | 0.143 | -1.389 |
| Plac8         | 1.326  | 13.272 | 3.921  | 0.003 | 0.144 | -1.396 |
| Gp49a         | 1.258  | 8.355  | 3.916  | 0.003 | 0.144 | -1.403 |
| Dcaf10        | -0.330 | 10.266 | -3.912 | 0.003 | 0.145 | -1.410 |
| Mgat5         | 0.893  | 9.520  | 3.910  | 0.003 | 0.145 | -1.412 |
| Dlg1          | -0.420 | 12.037 | -3.908 | 0.003 | 0.145 | -1.416 |
| Gm15662       | -2.098 | 10.711 | -3.907 | 0.003 | 0.145 | -1.417 |
| Fbxo16        | -0.416 | 6.940  | -3.904 | 0.003 | 0.145 | -1.421 |
| Cxcl12        | 0.460  | 9.803  | 3.904  | 0.003 | 0.145 | -1.422 |
| Tbce1         | 0.540  | 10.107 | 3.900  | 0.003 | 0.145 | -1.428 |
| 4930524L23Rik | 0.324  | 6.559  | 3.897  | 0.003 | 0.145 | -1.432 |

|               |        |        |        |       |       |        |
|---------------|--------|--------|--------|-------|-------|--------|
| Osbp          | -0.294 | 11.724 | -3.894 | 0.003 | 0.145 | -1.437 |
| Ssh1          | 0.620  | 9.117  | 3.894  | 0.003 | 0.145 | -1.437 |
| B630019K06Rik | -0.517 | 7.749  | -3.894 | 0.003 | 0.145 | -1.437 |
| Slc10a7       | -0.700 | 10.543 | -3.894 | 0.003 | 0.145 | -1.438 |
| Raver2        | -0.719 | 7.560  | -3.893 | 0.003 | 0.145 | -1.439 |
| Sec61g        | -0.490 | 10.230 | -3.892 | 0.003 | 0.145 | -1.440 |
| 4632428N05Rik | 0.782  | 9.235  | 3.891  | 0.003 | 0.145 | -1.441 |
| Gm13663       | 0.359  | 6.593  | 3.891  | 0.003 | 0.145 | -1.441 |
| Kcnd3         | -0.941 | 7.699  | -3.890 | 0.003 | 0.145 | -1.443 |
| Arrb2         | -0.409 | 8.916  | -3.888 | 0.003 | 0.145 | -1.446 |
| AC165433.1    | 0.369  | 6.646  | 3.883  | 0.003 | 0.146 | -1.454 |
| mmu-mir-689-2 | -1.895 | 10.460 | -3.882 | 0.003 | 0.146 | -1.456 |
| Sulf1         | 1.403  | 9.735  | 3.880  | 0.003 | 0.146 | -1.458 |
| Dtl           | 0.615  | 8.905  | 3.877  | 0.003 | 0.146 | -1.463 |
| Fpr1          | 0.573  | 6.638  | 3.876  | 0.003 | 0.146 | -1.464 |
| Fh1           | -0.317 | 11.673 | -3.875 | 0.003 | 0.146 | -1.466 |
| Tcrg-C        | 0.426  | 6.875  | 3.874  | 0.003 | 0.146 | -1.467 |
| Rnf19b        | 0.436  | 10.418 | 3.870  | 0.003 | 0.147 | -1.473 |
| Ubl4          | -0.368 | 10.239 | -3.868 | 0.003 | 0.147 | -1.476 |
| Grik5         | -0.369 | 7.698  | -3.865 | 0.003 | 0.147 | -1.481 |
| Rragb         | -0.461 | 7.234  | -3.863 | 0.003 | 0.148 | -1.484 |
| Rab32         | 0.625  | 9.065  | 3.860  | 0.003 | 0.148 | -1.488 |
| Rnf183        | 0.866  | 7.249  | 3.860  | 0.003 | 0.148 | -1.489 |
| Nr4a2         | -0.526 | 8.983  | -3.855 | 0.003 | 0.149 | -1.497 |
| Myo7a         | 0.648  | 7.323  | 3.852  | 0.003 | 0.149 | -1.501 |
| Gm16096       | 0.488  | 6.894  | 3.852  | 0.003 | 0.149 | -1.501 |
| Pkp1          | 1.083  | 8.368  | 3.850  | 0.003 | 0.149 | -1.504 |
| Mcpt1         | 1.424  | 9.450  | 3.848  | 0.003 | 0.149 | -1.507 |
| Pik3c2g       | -1.723 | 8.913  | -3.848 | 0.003 | 0.149 | -1.508 |
| Gpd1l         | -0.845 | 12.276 | -3.846 | 0.003 | 0.149 | -1.510 |
| Rdh10         | 1.026  | 11.300 | 3.844  | 0.003 | 0.149 | -1.513 |
| Syt11         | -1.414 | 10.130 | -3.842 | 0.003 | 0.149 | -1.517 |
| Lgmn          | 0.514  | 11.097 | 3.836  | 0.003 | 0.150 | -1.525 |
| Rnf149        | -0.627 | 10.947 | -3.836 | 0.003 | 0.150 | -1.526 |
| Tomm7         | -0.424 | 10.826 | -3.834 | 0.003 | 0.150 | -1.528 |
| Gps2          | -0.291 | 9.655  | -3.832 | 0.003 | 0.150 | -1.531 |
| Ldlr          | 0.647  | 11.596 | 3.832  | 0.003 | 0.150 | -1.532 |
| Stx17         | -0.461 | 11.241 | -3.830 | 0.003 | 0.150 | -1.535 |
| Lmcd1         | 0.847  | 8.800  | 3.825  | 0.003 | 0.151 | -1.542 |
| 2900056M20Rik | 0.401  | 6.878  | 3.824  | 0.003 | 0.151 | -1.543 |
| Kmo           | 0.729  | 7.491  | 3.824  | 0.003 | 0.151 | -1.544 |
| Fancd2        | 0.584  | 8.191  | 3.822  | 0.003 | 0.151 | -1.547 |
| Exoc6         | 0.462  | 9.975  | 3.821  | 0.003 | 0.151 | -1.548 |
| Bcl9          | 0.944  | 9.628  | 3.820  | 0.003 | 0.151 | -1.549 |
| Wnt16         | -0.456 | 6.579  | -3.819 | 0.003 | 0.151 | -1.552 |
| Ccr4          | 0.540  | 6.797  | 3.818  | 0.003 | 0.151 | -1.553 |
| 9830001H06Rik | 0.413  | 7.838  | 3.818  | 0.003 | 0.151 | -1.554 |
| Pou2af1       | 0.954  | 8.217  | 3.815  | 0.003 | 0.151 | -1.557 |
| Mllt3         | -1.714 | 12.558 | -3.814 | 0.003 | 0.151 | -1.559 |
| Ttll5         | 0.394  | 8.805  | 3.813  | 0.003 | 0.151 | -1.560 |

|               |        |        |        |       |       |        |
|---------------|--------|--------|--------|-------|-------|--------|
| H2-Eb1        | 0.968  | 10.539 | 3.811  | 0.003 | 0.151 | -1.564 |
| Gpr132        | 0.442  | 7.003  | 3.806  | 0.003 | 0.152 | -1.572 |
| Paox          | 0.610  | 9.038  | 3.802  | 0.003 | 0.152 | -1.577 |
| Plp1          | -0.453 | 7.573  | -3.802 | 0.003 | 0.152 | -1.578 |
| Pcdhb18       | 0.406  | 7.104  | 3.802  | 0.003 | 0.152 | -1.578 |
| Rspol         | -0.584 | 6.759  | -3.800 | 0.003 | 0.152 | -1.581 |
| I11b          | 1.603  | 8.050  | 3.797  | 0.004 | 0.152 | -1.585 |
| 5031414D18Rik | 0.463  | 6.748  | 3.797  | 0.004 | 0.152 | -1.585 |
| Lsmd1         | -0.453 | 9.027  | -3.796 | 0.004 | 0.152 | -1.586 |
| Preb          | -0.328 | 11.507 | -3.795 | 0.004 | 0.152 | -1.589 |
| 1700017B05Rik | 0.781  | 8.328  | 3.793  | 0.004 | 0.153 | -1.592 |
| Pcbd2         | -0.377 | 9.136  | -3.791 | 0.004 | 0.153 | -1.594 |
| Gm10012       | -0.348 | 6.712  | -3.790 | 0.004 | 0.153 | -1.596 |
| Acad8         | -0.574 | 10.564 | -3.788 | 0.004 | 0.153 | -1.598 |
| Pf4           | 0.710  | 7.630  | 3.787  | 0.004 | 0.153 | -1.600 |
| Gas1          | -0.820 | 8.585  | -3.785 | 0.004 | 0.153 | -1.603 |
| Poc1a         | 0.362  | 8.091  | 3.785  | 0.004 | 0.153 | -1.604 |
| Chd9          | -0.292 | 10.979 | -3.783 | 0.004 | 0.153 | -1.606 |
| Ceacam12      | 1.005  | 7.063  | 3.778  | 0.004 | 0.154 | -1.614 |
| Cldn4         | 2.456  | 8.892  | 3.776  | 0.004 | 0.154 | -1.618 |
| Coll1a1       | 1.066  | 11.231 | 3.775  | 0.004 | 0.154 | -1.619 |
| Tnfrsf9       | 0.425  | 6.881  | 3.773  | 0.004 | 0.154 | -1.622 |
| Csflr         | 0.757  | 9.437  | 3.770  | 0.004 | 0.155 | -1.626 |
| Syngn2        | -0.343 | 11.497 | -3.768 | 0.004 | 0.155 | -1.629 |
| Zfp672        | -0.252 | 8.969  | -3.767 | 0.004 | 0.155 | -1.631 |
| Myct1         | 0.422  | 7.558  | 3.765  | 0.004 | 0.155 | -1.634 |
| Rundc1        | -0.571 | 10.147 | -3.763 | 0.004 | 0.155 | -1.637 |
| Tmem30b       | -0.337 | 12.164 | -3.761 | 0.004 | 0.155 | -1.640 |
| Wdr63         | -0.549 | 7.057  | -3.760 | 0.004 | 0.155 | -1.641 |
| Preli2        | -0.976 | 10.050 | -3.760 | 0.004 | 0.155 | -1.642 |
| Fam169b       | 0.481  | 6.819  | 3.759  | 0.004 | 0.155 | -1.644 |
| Mup10         | -1.787 | 8.642  | -3.756 | 0.004 | 0.155 | -1.648 |
| Pask          | 0.358  | 7.958  | 3.755  | 0.004 | 0.155 | -1.649 |
| Ctsc          | 0.645  | 11.925 | 3.755  | 0.004 | 0.155 | -1.650 |
| Gtf3c1        | 0.306  | 10.553 | 3.754  | 0.004 | 0.155 | -1.651 |
| Abcb7         | 0.241  | 11.530 | 3.753  | 0.004 | 0.155 | -1.653 |
| Utp111        | -1.096 | 10.957 | -3.750 | 0.004 | 0.156 | -1.657 |
| Rps24         | -0.337 | 13.025 | -3.749 | 0.004 | 0.156 | -1.660 |
| Arpc51        | -0.464 | 11.018 | -3.744 | 0.004 | 0.156 | -1.667 |
| Sgpp1         | -0.704 | 11.378 | -3.743 | 0.004 | 0.156 | -1.669 |
| Fer           | -0.423 | 10.344 | -3.742 | 0.004 | 0.156 | -1.670 |
| Arhgap9       | 0.594  | 7.652  | 3.741  | 0.004 | 0.156 | -1.672 |
| Lgr5          | -0.975 | 8.266  | -3.740 | 0.004 | 0.156 | -1.672 |
| Mcm2          | 0.467  | 9.749  | 3.740  | 0.004 | 0.156 | -1.672 |
| Net1          | 0.680  | 12.169 | 3.738  | 0.004 | 0.156 | -1.676 |
| Ttc17         | -0.371 | 10.400 | -3.737 | 0.004 | 0.156 | -1.677 |
| Kcnipl        | -0.785 | 7.006  | -3.737 | 0.004 | 0.156 | -1.678 |
| Dcstamp       | 0.500  | 6.819  | 3.736  | 0.004 | 0.156 | -1.679 |
| Cxcl3         | 0.999  | 7.115  | 3.733  | 0.004 | 0.156 | -1.683 |
| Aph1b         | -0.427 | 8.168  | -3.733 | 0.004 | 0.156 | -1.684 |

|               |        |        |        |       |       |        |
|---------------|--------|--------|--------|-------|-------|--------|
| 1190003J15Rik | 0.592  | 8.689  | 3.731  | 0.004 | 0.156 | -1.686 |
| Edem2         | -0.413 | 10.925 | -3.729 | 0.004 | 0.156 | -1.689 |
| Mrpl1         | -0.299 | 9.884  | -3.728 | 0.004 | 0.156 | -1.691 |
| Gm11557       | 0.322  | 6.572  | 3.728  | 0.004 | 0.156 | -1.692 |
| Klrb1b        | 0.566  | 7.030  | 3.727  | 0.004 | 0.156 | -1.693 |
| Gm14738       | -0.955 | 7.182  | -3.726 | 0.004 | 0.156 | -1.694 |
| Ctss          | 1.539  | 10.657 | 3.723  | 0.004 | 0.157 | -1.699 |
| Slcla3        | -0.993 | 9.029  | -3.723 | 0.004 | 0.157 | -1.700 |
| AC090887.2    | 1.282  | 7.372  | 3.721  | 0.004 | 0.157 | -1.702 |
| Klrg1         | 0.515  | 7.028  | 3.721  | 0.004 | 0.157 | -1.703 |
| Gsn           | -1.260 | 13.238 | -3.720 | 0.004 | 0.157 | -1.704 |
| Tons1         | 0.556  | 8.396  | 3.718  | 0.004 | 0.157 | -1.706 |
| 1810033B17Rik | 0.728  | 6.851  | 3.717  | 0.004 | 0.157 | -1.709 |
| Dusp13        | -1.247 | 7.419  | -3.714 | 0.004 | 0.157 | -1.712 |
| Mgll          | -1.153 | 10.179 | -3.714 | 0.004 | 0.157 | -1.712 |
| Hrnpr         | 0.281  | 11.393 | 3.712  | 0.004 | 0.157 | -1.716 |
| Tenc1         | -0.627 | 9.173  | -3.712 | 0.004 | 0.157 | -1.716 |
| Slc35a1       | -0.720 | 12.250 | -3.709 | 0.004 | 0.157 | -1.720 |
| Tnf           | 0.787  | 6.920  | 3.707  | 0.004 | 0.157 | -1.723 |
| S100a8        | 1.607  | 7.494  | 3.707  | 0.004 | 0.157 | -1.723 |
| Tceb2         | -0.373 | 10.093 | -3.707 | 0.004 | 0.157 | -1.724 |
| Gas2l1        | 0.461  | 9.563  | 3.704  | 0.004 | 0.157 | -1.728 |
| Zfp871        | 0.459  | 10.307 | 3.704  | 0.004 | 0.157 | -1.728 |
| AC114917.1    | 0.353  | 6.560  | 3.703  | 0.004 | 0.157 | -1.729 |
| Galnt12       | -0.605 | 7.933  | -3.702 | 0.004 | 0.157 | -1.731 |
| Klhl33        | 0.645  | 6.786  | 3.702  | 0.004 | 0.157 | -1.731 |
| Prrc2c        | 0.448  | 11.726 | 3.699  | 0.004 | 0.157 | -1.736 |
| Btbd3         | -1.282 | 11.567 | -3.697 | 0.004 | 0.157 | -1.739 |
| Slfn2         | 0.731  | 8.390  | 3.696  | 0.004 | 0.157 | -1.741 |
| Scd2          | 0.697  | 13.147 | 3.696  | 0.004 | 0.157 | -1.741 |
| Cytip         | 0.892  | 8.321  | 3.696  | 0.004 | 0.157 | -1.741 |
| Cnot6l        | -0.315 | 11.063 | -3.695 | 0.004 | 0.157 | -1.742 |
| Gtf2i         | -0.238 | 10.988 | -3.695 | 0.004 | 0.157 | -1.742 |
| Pqlc1         | -0.989 | 10.898 | -3.694 | 0.004 | 0.157 | -1.743 |
| Tagln         | -1.420 | 13.087 | -3.692 | 0.004 | 0.157 | -1.747 |
| Epb4.114a     | -0.731 | 8.599  | -3.692 | 0.004 | 0.157 | -1.747 |
| Lzic          | 0.348  | 9.603  | 3.691  | 0.004 | 0.157 | -1.748 |
| Gng5          | -0.473 | 10.070 | -3.691 | 0.004 | 0.157 | -1.749 |
| C230081A13Rik | 0.874  | 10.118 | 3.690  | 0.004 | 0.157 | -1.751 |
| Timeless      | 0.400  | 8.549  | 3.688  | 0.004 | 0.157 | -1.753 |
| Lyz2          | 1.154  | 10.969 | 3.687  | 0.004 | 0.157 | -1.755 |
| Fam110c       | -0.312 | 10.292 | -3.686 | 0.004 | 0.157 | -1.756 |
| Grb14         | -0.734 | 8.269  | -3.682 | 0.004 | 0.158 | -1.763 |
| I11f6         | 0.940  | 6.852  | 3.678  | 0.004 | 0.158 | -1.769 |
| Mmrn2         | 0.669  | 8.911  | 3.677  | 0.004 | 0.158 | -1.769 |
| Gm16154       | 0.405  | 6.639  | 3.673  | 0.004 | 0.159 | -1.776 |
| Mmp3          | 1.793  | 8.695  | 3.673  | 0.004 | 0.159 | -1.776 |
| Cd3001b       | 0.516  | 7.423  | 3.667  | 0.004 | 0.160 | -1.786 |
| Gm12971       | 0.321  | 6.576  | 3.667  | 0.004 | 0.160 | -1.786 |
| Dcp2          | 0.336  | 10.575 | 3.665  | 0.004 | 0.160 | -1.789 |

|               |        |        |        |       |       |        |
|---------------|--------|--------|--------|-------|-------|--------|
| Tmcc3         | 0.801  | 10.919 | 3.664  | 0.004 | 0.160 | -1.789 |
| 2010016I18Rik | 0.407  | 7.941  | 3.663  | 0.004 | 0.160 | -1.791 |
| Lxn           | -0.597 | 9.203  | -3.657 | 0.004 | 0.161 | -1.801 |
| Nfkbie        | 0.395  | 7.555  | 3.657  | 0.004 | 0.161 | -1.801 |
| Hmha1         | 0.552  | 8.499  | 3.657  | 0.004 | 0.161 | -1.802 |
| 5033414D02Rik | -1.004 | 10.242 | -3.653 | 0.004 | 0.161 | -1.806 |
| Prrx1         | 0.758  | 7.750  | 3.653  | 0.004 | 0.161 | -1.808 |
| Ovol2         | -0.580 | 8.593  | -3.652 | 0.004 | 0.161 | -1.809 |
| Csrp1         | -1.107 | 12.872 | -3.651 | 0.004 | 0.161 | -1.811 |
| Flrt3         | 0.695  | 10.143 | 3.648  | 0.004 | 0.162 | -1.815 |
| 5930434B04Rik | -0.340 | 11.797 | -3.648 | 0.004 | 0.162 | -1.815 |
| Cdh5          | 0.638  | 9.101  | 3.647  | 0.005 | 0.162 | -1.817 |
| Polr2a        | 0.469  | 11.261 | 3.643  | 0.005 | 0.162 | -1.822 |
| Ceacam1       | 1.996  | 12.618 | 3.642  | 0.005 | 0.162 | -1.824 |
| Zswim4        | 0.433  | 8.559  | 3.641  | 0.005 | 0.162 | -1.825 |
| Gm15932       | 0.313  | 6.572  | 3.641  | 0.005 | 0.162 | -1.826 |
| Nup107        | 0.385  | 9.783  | 3.640  | 0.005 | 0.162 | -1.828 |
| Igfbp2        | -1.288 | 7.731  | -3.640 | 0.005 | 0.162 | -1.828 |
| Zmat3         | -0.497 | 9.682  | -3.639 | 0.005 | 0.162 | -1.829 |
| Duox1         | 0.465  | 7.116  | 3.637  | 0.005 | 0.162 | -1.832 |
| Gm9733        | 0.355  | 6.529  | 3.636  | 0.005 | 0.162 | -1.834 |
| Plekhn3       | 0.591  | 8.190  | 3.631  | 0.005 | 0.163 | -1.841 |
| Nlrp12        | 0.463  | 6.686  | 3.631  | 0.005 | 0.163 | -1.841 |
| Plcg2         | 0.417  | 9.465  | 3.630  | 0.005 | 0.163 | -1.843 |
| Gm11946       | -1.425 | 7.745  | -3.629 | 0.005 | 0.163 | -1.844 |
| Hells         | 0.798  | 10.092 | 3.625  | 0.005 | 0.164 | -1.851 |
| Fgd6          | 0.687  | 9.928  | 3.623  | 0.005 | 0.164 | -1.853 |
| Yaf2          | -0.383 | 9.188  | -3.621 | 0.005 | 0.165 | -1.858 |
| Displ         | -0.837 | 8.916  | -3.616 | 0.005 | 0.165 | -1.864 |
| Ssh2          | 0.511  | 10.016 | 3.611  | 0.005 | 0.166 | -1.872 |
| Gm16190       | 0.426  | 6.765  | 3.609  | 0.005 | 0.166 | -1.876 |
| AC073563.1    | 0.602  | 6.683  | 3.609  | 0.005 | 0.166 | -1.876 |
| Rplp2         | -0.462 | 10.588 | -3.608 | 0.005 | 0.166 | -1.876 |
| Fscn1         | 0.442  | 7.846  | 3.607  | 0.005 | 0.166 | -1.879 |
| Mccc1         | -0.472 | 10.105 | -3.607 | 0.005 | 0.166 | -1.879 |
| Rgl1          | 0.302  | 8.548  | 3.605  | 0.005 | 0.166 | -1.881 |
| Pld3          | -0.918 | 10.951 | -3.605 | 0.005 | 0.166 | -1.882 |
| Unc93b1       | 0.728  | 9.154  | 3.604  | 0.005 | 0.166 | -1.884 |
| Prkch         | 0.461  | 8.138  | 3.603  | 0.005 | 0.166 | -1.884 |
| Slco2a1       | -1.441 | 11.209 | -3.603 | 0.005 | 0.166 | -1.885 |
| Fxyd1         | -0.835 | 8.086  | -3.602 | 0.005 | 0.166 | -1.886 |
| Gja4          | 0.295  | 7.211  | 3.602  | 0.005 | 0.166 | -1.886 |
| Phc1          | -0.600 | 8.958  | -3.601 | 0.005 | 0.166 | -1.888 |
| Wdfy4         | 0.790  | 7.700  | 3.599  | 0.005 | 0.166 | -1.891 |
| Smarcd3       | -0.629 | 7.692  | -3.597 | 0.005 | 0.166 | -1.894 |
| E2f3          | 0.342  | 8.764  | 3.596  | 0.005 | 0.166 | -1.895 |
| Mfsd6         | -0.545 | 12.210 | -3.591 | 0.005 | 0.168 | -1.903 |
| Zmynd8        | 0.315  | 10.300 | 3.590  | 0.005 | 0.168 | -1.906 |
| Gm3355        | -0.395 | 7.228  | -3.589 | 0.005 | 0.168 | -1.906 |
| Nrip3         | 0.456  | 7.833  | 3.588  | 0.005 | 0.168 | -1.908 |

|               |        |        |        |       |       |        |
|---------------|--------|--------|--------|-------|-------|--------|
| Icos          | 0.376  | 7.357  | 3.586  | 0.005 | 0.168 | -1.911 |
| Plekhm1       | 0.415  | 9.521  | 3.586  | 0.005 | 0.168 | -1.911 |
| Mthfd11       | 0.760  | 9.390  | 3.585  | 0.005 | 0.168 | -1.912 |
| Cckar         | -1.235 | 7.189  | -3.585 | 0.005 | 0.168 | -1.912 |
| Igf2as        | 0.403  | 6.701  | 3.582  | 0.005 | 0.168 | -1.918 |
| Pla2g12a      | -0.635 | 10.027 | -3.580 | 0.005 | 0.168 | -1.920 |
| Peg3          | -0.746 | 9.505  | -3.580 | 0.005 | 0.168 | -1.921 |
| Adam19        | 0.564  | 9.284  | 3.578  | 0.005 | 0.168 | -1.924 |
| Fhl5          | 0.364  | 6.861  | 3.577  | 0.005 | 0.168 | -1.925 |
| Slc15a4       | -0.421 | 8.687  | -3.577 | 0.005 | 0.168 | -1.926 |
| C1galt1c1     | -0.396 | 11.463 | -3.575 | 0.005 | 0.168 | -1.929 |
| Mtmr11        | 0.550  | 8.212  | 3.574  | 0.005 | 0.168 | -1.930 |
| Neb           | 0.566  | 7.227  | 3.574  | 0.005 | 0.168 | -1.930 |
| P2ry6         | 0.561  | 7.596  | 3.572  | 0.005 | 0.168 | -1.933 |
| Kdr           | 0.715  | 9.724  | 3.572  | 0.005 | 0.168 | -1.933 |
| Gm3086        | 0.331  | 6.667  | 3.571  | 0.005 | 0.168 | -1.934 |
| Cdh10         | 0.631  | 7.153  | 3.569  | 0.005 | 0.169 | -1.938 |
| Gtf2a2        | -0.421 | 10.849 | -3.568 | 0.005 | 0.169 | -1.939 |
| Cbr3          | -1.932 | 10.964 | -3.567 | 0.005 | 0.169 | -1.941 |
| F630028010Rik | 0.823  | 7.557  | 3.565  | 0.005 | 0.169 | -1.943 |
| Pcp411        | -1.502 | 9.060  | -3.562 | 0.005 | 0.170 | -1.949 |
| Slamf8        | 0.450  | 7.147  | 3.559  | 0.005 | 0.170 | -1.953 |
| Ptpn12        | 0.477  | 10.479 | 3.558  | 0.005 | 0.170 | -1.955 |
| Tmem90b       | -0.510 | 6.742  | -3.558 | 0.005 | 0.170 | -1.955 |
| Zbtb48        | -0.417 | 8.458  | -3.557 | 0.005 | 0.170 | -1.957 |
| Sema6d        | 0.889  | 8.717  | 3.556  | 0.005 | 0.170 | -1.958 |
| Zfr           | -0.286 | 12.024 | -3.556 | 0.005 | 0.170 | -1.959 |
| Myo1g         | 0.466  | 7.514  | 3.555  | 0.005 | 0.170 | -1.959 |
| Coll2a1       | 1.495  | 10.372 | 3.553  | 0.005 | 0.170 | -1.962 |
| Cxcr6         | 0.683  | 7.276  | 3.551  | 0.005 | 0.170 | -1.966 |
| Arhgap6       | -0.475 | 8.301  | -3.550 | 0.005 | 0.170 | -1.968 |
| Itgb7         | 0.625  | 7.612  | 3.550  | 0.005 | 0.170 | -1.968 |
| Clqa          | 0.677  | 9.581  | 3.549  | 0.005 | 0.170 | -1.968 |
| 2900041M22Rik | -0.311 | 6.607  | -3.549 | 0.005 | 0.170 | -1.969 |
| Ccr3          | 0.738  | 7.509  | 3.548  | 0.005 | 0.170 | -1.970 |
| Ripk3         | 0.907  | 10.149 | 3.547  | 0.005 | 0.170 | -1.971 |
| Lilrb4        | 0.830  | 7.809  | 3.547  | 0.005 | 0.170 | -1.972 |
| Cd48          | 0.460  | 7.589  | 3.546  | 0.005 | 0.170 | -1.973 |
| Serp1         | -0.392 | 13.388 | -3.546 | 0.005 | 0.170 | -1.974 |
| Mup20         | 0.331  | 6.517  | 3.546  | 0.005 | 0.170 | -1.974 |
| Pdcd4         | -0.958 | 13.655 | -3.542 | 0.005 | 0.170 | -1.980 |
| Kifc3         | 0.606  | 9.105  | 3.542  | 0.005 | 0.170 | -1.980 |
| Nhs11         | 1.150  | 10.089 | 3.541  | 0.005 | 0.170 | -1.981 |
| Illa          | 1.679  | 7.832  | 3.541  | 0.005 | 0.170 | -1.981 |
| Dopey2        | -0.670 | 10.977 | -3.539 | 0.005 | 0.170 | -1.985 |
| Fcrla         | 0.492  | 6.685  | 3.539  | 0.005 | 0.170 | -1.985 |
| Asb13         | -0.904 | 9.895  | -3.538 | 0.005 | 0.170 | -1.986 |
| Astn1         | -0.822 | 7.133  | -3.538 | 0.005 | 0.170 | -1.986 |
| Igfbp11       | 0.316  | 6.509  | 3.537  | 0.005 | 0.170 | -1.987 |
| Pyhin1        | 0.497  | 7.323  | 3.535  | 0.005 | 0.170 | -1.991 |

|                |        |        |        |       |       |        |
|----------------|--------|--------|--------|-------|-------|--------|
| Crhr2          | 0.322  | 6.512  | 3.534  | 0.005 | 0.170 | -1.992 |
| Trabd          | -0.373 | 11.199 | -3.534 | 0.005 | 0.170 | -1.993 |
| Zfp69          | 0.345  | 7.302  | 3.531  | 0.005 | 0.170 | -1.996 |
| Mrps28         | -0.295 | 8.906  | -3.528 | 0.005 | 0.171 | -2.002 |
| Rpl36          | -0.340 | 10.536 | -3.527 | 0.005 | 0.171 | -2.004 |
| Hapl1          | -0.432 | 6.730  | -3.526 | 0.005 | 0.171 | -2.005 |
| Gcnt3          | -0.972 | 14.612 | -3.524 | 0.006 | 0.171 | -2.008 |
| Hp             | 1.734  | 8.139  | 3.520  | 0.006 | 0.171 | -2.014 |
| Gm8818         | 0.504  | 6.604  | 3.520  | 0.006 | 0.171 | -2.015 |
| Ciita          | 0.566  | 7.600  | 3.520  | 0.006 | 0.171 | -2.015 |
| Rab44          | 0.450  | 7.268  | 3.520  | 0.006 | 0.171 | -2.015 |
| SNORD91        | -0.316 | 6.600  | -3.519 | 0.006 | 0.171 | -2.015 |
| Nlr1           | 0.379  | 7.954  | 3.518  | 0.006 | 0.171 | -2.017 |
| Aadac          | 1.217  | 10.537 | 3.518  | 0.006 | 0.171 | -2.018 |
| Rps28          | -0.449 | 10.966 | -3.517 | 0.006 | 0.171 | -2.020 |
| Pp1r3e         | -0.747 | 7.416  | -3.516 | 0.006 | 0.171 | -2.020 |
| Kdm5a          | 0.321  | 11.265 | 3.515  | 0.006 | 0.171 | -2.022 |
| Tpd52          | -0.234 | 13.633 | -3.514 | 0.006 | 0.171 | -2.024 |
| Scubel         | 0.789  | 9.164  | 3.513  | 0.006 | 0.171 | -2.025 |
| mmu-mir-2134-4 | -1.377 | 8.737  | -3.513 | 0.006 | 0.171 | -2.026 |
| BC024582       | 0.453  | 6.661  | 3.512  | 0.006 | 0.171 | -2.026 |
| 4930471I20Rik  | -0.294 | 6.498  | -3.510 | 0.006 | 0.171 | -2.030 |
| Rgs7           | -0.411 | 7.337  | -3.508 | 0.006 | 0.171 | -2.033 |
| Rpl36a1        | -0.525 | 11.721 | -3.506 | 0.006 | 0.171 | -2.036 |
| Lpxn           | 0.372  | 7.377  | 3.506  | 0.006 | 0.171 | -2.037 |
| BC013712       | 0.552  | 7.537  | 3.505  | 0.006 | 0.171 | -2.037 |
| Zfp692         | -0.360 | 9.037  | -3.505 | 0.006 | 0.171 | -2.038 |
| Ifitm6         | 0.592  | 6.707  | 3.505  | 0.006 | 0.171 | -2.038 |
| Ctla4          | 0.375  | 7.033  | 3.504  | 0.006 | 0.171 | -2.039 |
| Ogn            | -1.362 | 10.422 | -3.504 | 0.006 | 0.171 | -2.040 |
| Dhh            | 0.748  | 7.044  | 3.503  | 0.006 | 0.171 | -2.041 |
| AC214054.2     | -0.680 | 6.842  | -3.503 | 0.006 | 0.171 | -2.042 |
| Reep2          | -0.442 | 6.875  | -3.502 | 0.006 | 0.171 | -2.043 |
| Nkd1           | -0.760 | 8.449  | -3.501 | 0.006 | 0.171 | -2.044 |
| Foxn3          | 0.481  | 9.037  | 3.500  | 0.006 | 0.171 | -2.045 |
| Atp2a3         | -0.814 | 14.019 | -3.500 | 0.006 | 0.171 | -2.046 |
| Anxa9          | 0.382  | 7.320  | 3.498  | 0.006 | 0.172 | -2.049 |
| Slc25a38       | -0.377 | 9.000  | -3.496 | 0.006 | 0.172 | -2.051 |
| Cd101          | 0.418  | 7.143  | 3.496  | 0.006 | 0.172 | -2.051 |
| 1810027010Rik  | -0.368 | 8.954  | -3.495 | 0.006 | 0.172 | -2.053 |
| Skint3         | -0.366 | 6.534  | -3.494 | 0.006 | 0.172 | -2.055 |
| Get4           | -0.270 | 9.805  | -3.493 | 0.006 | 0.172 | -2.057 |
| Prom2          | -1.170 | 7.629  | -3.492 | 0.006 | 0.172 | -2.057 |
| Ccdc90a        | 0.617  | 10.552 | 3.491  | 0.006 | 0.172 | -2.059 |
| 2900010M23Rik  | -0.365 | 9.690  | -3.491 | 0.006 | 0.172 | -2.060 |
| Dusp6          | 0.915  | 10.298 | 3.491  | 0.006 | 0.172 | -2.060 |
| Mitd1          | -0.259 | 9.358  | -3.490 | 0.006 | 0.172 | -2.062 |
| Srp3           | -0.516 | 6.874  | -3.488 | 0.006 | 0.172 | -2.065 |
| Col4a2         | 0.795  | 11.293 | 3.486  | 0.006 | 0.172 | -2.067 |
| Rnf125         | 0.619  | 7.985  | 3.486  | 0.006 | 0.172 | -2.068 |

|                |        |        |        |       |       |        |
|----------------|--------|--------|--------|-------|-------|--------|
| AC079181.4     | 0.770  | 6.786  | 3.481  | 0.006 | 0.173 | -2.075 |
| Rps27          | -0.401 | 10.608 | -3.478 | 0.006 | 0.174 | -2.080 |
| I110032F04Rik  | 0.380  | 6.542  | 3.477  | 0.006 | 0.174 | -2.081 |
| Hs3st3b1       | -2.093 | 10.768 | -3.476 | 0.006 | 0.174 | -2.084 |
| Rab31          | 0.576  | 9.745  | 3.476  | 0.006 | 0.174 | -2.084 |
| Spr            | -0.396 | 9.738  | -3.475 | 0.006 | 0.174 | -2.085 |
| Txlnb          | 0.289  | 6.962  | 3.473  | 0.006 | 0.174 | -2.087 |
| Osbp12         | -0.851 | 12.108 | -3.473 | 0.006 | 0.174 | -2.089 |
| Gm5453         | 0.242  | 6.513  | 3.471  | 0.006 | 0.174 | -2.092 |
| Grid2ip        | 0.449  | 6.608  | 3.470  | 0.006 | 0.174 | -2.092 |
| Pbx4           | -0.393 | 6.548  | -3.470 | 0.006 | 0.174 | -2.093 |
| Aldh1a1        | -1.253 | 12.319 | -3.470 | 0.006 | 0.174 | -2.093 |
| Atad2b         | 0.435  | 9.742  | 3.469  | 0.006 | 0.174 | -2.095 |
| Phldb1         | -0.358 | 11.090 | -3.466 | 0.006 | 0.175 | -2.099 |
| Runx2          | 0.753  | 7.953  | 3.465  | 0.006 | 0.175 | -2.101 |
| AC239678.1     | -0.273 | 6.517  | -3.463 | 0.006 | 0.175 | -2.103 |
| Med27          | 0.319  | 8.480  | 3.460  | 0.006 | 0.176 | -2.108 |
| 2210013021Rik  | -0.377 | 8.447  | -3.458 | 0.006 | 0.176 | -2.111 |
| 1810035L17Rik  | -0.282 | 9.280  | -3.458 | 0.006 | 0.176 | -2.111 |
| Gsdmd          | 0.893  | 11.466 | 3.457  | 0.006 | 0.176 | -2.113 |
| Ang            | -0.824 | 9.101  | -3.457 | 0.006 | 0.176 | -2.114 |
| B3galt4        | -0.622 | 8.263  | -3.454 | 0.006 | 0.176 | -2.117 |
| Mogat1         | -2.489 | 9.879  | -3.454 | 0.006 | 0.176 | -2.118 |
| Cd74           | 0.948  | 10.877 | 3.452  | 0.006 | 0.177 | -2.121 |
| Rps25-ps1      | -0.359 | 9.258  | -3.447 | 0.006 | 0.178 | -2.129 |
| Slc20a1        | 0.855  | 10.116 | 3.443  | 0.006 | 0.179 | -2.135 |
| Col4a1         | 0.925  | 11.881 | 3.442  | 0.006 | 0.179 | -2.136 |
| Cyp1b1         | 1.049  | 8.995  | 3.442  | 0.006 | 0.179 | -2.137 |
| Klf9           | -0.524 | 10.559 | -3.441 | 0.006 | 0.179 | -2.138 |
| Pi16           | -0.799 | 8.087  | -3.441 | 0.006 | 0.179 | -2.138 |
| 9930111J21Rik1 | 0.536  | 6.863  | 3.440  | 0.006 | 0.179 | -2.140 |
| Tgif2          | 0.463  | 7.325  | 3.439  | 0.006 | 0.179 | -2.141 |
| Nt5dc3         | -0.569 | 9.352  | -3.438 | 0.006 | 0.179 | -2.143 |
| Pigy           | 0.311  | 9.377  | 3.435  | 0.006 | 0.179 | -2.147 |
| Erp44          | -0.479 | 12.436 | -3.433 | 0.006 | 0.179 | -2.150 |
| Nin            | 0.553  | 9.736  | 3.433  | 0.006 | 0.179 | -2.151 |
| Fry            | -0.624 | 9.605  | -3.432 | 0.006 | 0.179 | -2.151 |
| Elk3           | 0.660  | 9.158  | 3.431  | 0.006 | 0.179 | -2.153 |
| Rab3d          | -0.909 | 12.449 | -3.431 | 0.006 | 0.179 | -2.154 |
| Ctnnb1         | 0.298  | 14.828 | 3.431  | 0.006 | 0.179 | -2.154 |
| Ttc30b         | -0.337 | 8.808  | -3.429 | 0.006 | 0.179 | -2.157 |
| Cyp21a1        | 0.545  | 6.686  | 3.429  | 0.006 | 0.179 | -2.157 |
| Dom3z          | -0.202 | 8.604  | -3.429 | 0.006 | 0.179 | -2.157 |
| Gm9746         | -0.948 | 8.392  | -3.429 | 0.006 | 0.179 | -2.158 |
| Hhex           | 0.486  | 7.716  | 3.428  | 0.006 | 0.179 | -2.158 |
| H2-Ab1         | 0.847  | 10.042 | 3.426  | 0.007 | 0.179 | -2.162 |
| 2610507B11Rik  | 0.256  | 13.476 | 3.425  | 0.007 | 0.179 | -2.163 |
| 2700049A03Rik  | 0.404  | 8.603  | 3.423  | 0.007 | 0.179 | -2.167 |
| AC151712.4     | 0.752  | 8.169  | 3.423  | 0.007 | 0.179 | -2.167 |
| Mall           | 1.493  | 10.502 | 3.422  | 0.007 | 0.179 | -2.167 |



|               |        |        |        |       |       |        |
|---------------|--------|--------|--------|-------|-------|--------|
| Ccdc130       | -0.237 | 8.587  | -3.422 | 0.007 | 0.179 | -2.169 |
| D19Erttd737e  | 0.383  | 10.101 | 3.419  | 0.007 | 0.179 | -2.172 |
| Kcnq1         | 0.793  | 10.419 | 3.419  | 0.007 | 0.179 | -2.173 |
| Atp6v1b2      | 0.340  | 11.583 | 3.418  | 0.007 | 0.179 | -2.175 |
| Irf4          | 0.908  | 7.542  | 3.416  | 0.007 | 0.179 | -2.178 |
| Podn11        | 0.477  | 6.990  | 3.416  | 0.007 | 0.179 | -2.178 |
| Ras111a       | 0.489  | 7.278  | 3.415  | 0.007 | 0.179 | -2.178 |
| D18Erttd653e  | 0.658  | 8.589  | 3.414  | 0.007 | 0.179 | -2.180 |
| Timp1         | 1.114  | 8.117  | 3.414  | 0.007 | 0.179 | -2.181 |
| Zfhx4         | -0.715 | 7.399  | -3.413 | 0.007 | 0.179 | -2.182 |
| Inpp5a        | -0.958 | 10.753 | -3.413 | 0.007 | 0.179 | -2.182 |
| Ptprcap       | 0.507  | 7.239  | 3.413  | 0.007 | 0.179 | -2.183 |
| Arhgap4       | 0.458  | 7.741  | 3.412  | 0.007 | 0.179 | -2.184 |
| Cenpk         | 0.471  | 8.306  | 3.411  | 0.007 | 0.179 | -2.185 |
| Slco5a1       | 0.522  | 6.950  | 3.411  | 0.007 | 0.179 | -2.185 |
| Erg           | 0.472  | 8.144  | 3.411  | 0.007 | 0.179 | -2.186 |
| Neto2         | 0.488  | 8.101  | 3.410  | 0.007 | 0.179 | -2.187 |
| Poldip3       | 0.452  | 11.052 | 3.408  | 0.007 | 0.179 | -2.190 |
| E430018J23Rik | 0.473  | 8.061  | 3.408  | 0.007 | 0.179 | -2.190 |
| Pax7          | -0.311 | 6.564  | -3.408 | 0.007 | 0.179 | -2.191 |
| Serp2         | -0.363 | 6.648  | -3.407 | 0.007 | 0.179 | -2.192 |
| Ms4a6b        | 0.645  | 8.162  | 3.407  | 0.007 | 0.179 | -2.192 |
| Coq2          | -0.308 | 10.230 | -3.406 | 0.007 | 0.179 | -2.193 |
| Gm16246       | -0.370 | 6.536  | -3.406 | 0.007 | 0.179 | -2.194 |
| Ppib          | -0.443 | 12.730 | -3.404 | 0.007 | 0.180 | -2.196 |
| Tmprss4       | 0.480  | 11.784 | 3.403  | 0.007 | 0.180 | -2.198 |
| Skil          | 0.293  | 11.927 | 3.401  | 0.007 | 0.180 | -2.201 |
| Ccl28         | 1.249  | 9.873  | 3.399  | 0.007 | 0.180 | -2.204 |
| Tceal5        | -0.453 | 6.762  | -3.396 | 0.007 | 0.181 | -2.209 |
| Gm10053       | 0.467  | 7.869  | 3.395  | 0.007 | 0.181 | -2.210 |
| Mab2113       | 0.475  | 6.879  | 3.394  | 0.007 | 0.181 | -2.212 |
| Ly6k          | -0.348 | 7.315  | -3.392 | 0.007 | 0.181 | -2.215 |
| Rab23         | -0.556 | 8.962  | -3.391 | 0.007 | 0.181 | -2.216 |
| Snx3          | -0.361 | 11.209 | -3.391 | 0.007 | 0.181 | -2.216 |
| Lrrc25        | 0.340  | 7.094  | 3.391  | 0.007 | 0.181 | -2.217 |
| Tlr3          | 0.552  | 9.829  | 3.391  | 0.007 | 0.181 | -2.217 |
| Ces2b         | -1.065 | 10.167 | -3.390 | 0.007 | 0.181 | -2.218 |
| Slamf7        | 0.593  | 7.130  | 3.390  | 0.007 | 0.181 | -2.219 |
| Wdr11         | 0.277  | 10.706 | 3.389  | 0.007 | 0.181 | -2.219 |
| Klrg2         | -1.178 | 7.710  | -3.389 | 0.007 | 0.181 | -2.220 |
| Mir5102       | -1.608 | 8.577  | -3.388 | 0.007 | 0.181 | -2.222 |
| Ly6g6c        | -1.166 | 7.938  | -3.386 | 0.007 | 0.181 | -2.224 |
| B4galt6       | 0.522  | 11.727 | 3.385  | 0.007 | 0.181 | -2.226 |
| Meg3          | -1.172 | 8.475  | -3.383 | 0.007 | 0.181 | -2.230 |
| Arl5a         | 0.568  | 11.489 | 3.382  | 0.007 | 0.181 | -2.231 |
| A830010M20Rik | 0.337  | 9.323  | 3.382  | 0.007 | 0.181 | -2.231 |
| Tnfaip2       | 0.601  | 8.304  | 3.381  | 0.007 | 0.181 | -2.232 |
| Fxyd5         | 0.723  | 8.840  | 3.381  | 0.007 | 0.181 | -2.233 |
| Gm14136       | -0.272 | 6.564  | -3.381 | 0.007 | 0.181 | -2.233 |
| Krt78         | -1.704 | 8.845  | -3.381 | 0.007 | 0.181 | -2.233 |

|               |        |        |        |       |       |        |
|---------------|--------|--------|--------|-------|-------|--------|
| 9330182L06Rik | -0.627 | 8.116  | -3.381 | 0.007 | 0.181 | -2.233 |
| Susd4         | -0.440 | 6.852  | -3.380 | 0.007 | 0.181 | -2.234 |
| Adar          | -0.594 | 10.446 | -3.379 | 0.007 | 0.181 | -2.235 |
| Selp          | 1.340  | 8.020  | 3.379  | 0.007 | 0.181 | -2.236 |
| Dpt           | -0.773 | 11.391 | -3.378 | 0.007 | 0.181 | -2.236 |
| Fxyd3         | -0.909 | 11.781 | -3.378 | 0.007 | 0.181 | -2.237 |
| Gbx2          | 0.368  | 6.764  | 3.378  | 0.007 | 0.181 | -2.238 |
| Gm7609        | 0.498  | 7.607  | 3.377  | 0.007 | 0.181 | -2.239 |
| Pon2          | -0.765 | 13.793 | -3.375 | 0.007 | 0.181 | -2.242 |
| Lif           | 0.511  | 7.694  | 3.374  | 0.007 | 0.181 | -2.243 |
| Rabgap11      | 0.401  | 11.339 | 3.374  | 0.007 | 0.181 | -2.243 |
| Gm16054       | 1.732  | 8.062  | 3.370  | 0.007 | 0.182 | -2.249 |
| Cxcl14        | 1.113  | 9.351  | 3.370  | 0.007 | 0.182 | -2.250 |
| Tpsb2         | -0.953 | 7.208  | -3.369 | 0.007 | 0.182 | -2.251 |
| Slc33a1       | -0.423 | 11.269 | -3.367 | 0.007 | 0.182 | -2.255 |
| Ms4a6d        | 0.773  | 7.693  | 3.366  | 0.007 | 0.182 | -2.256 |
| Oxsm          | 0.480  | 9.106  | 3.365  | 0.007 | 0.182 | -2.258 |
| Pik3ap1       | 0.590  | 7.653  | 3.364  | 0.007 | 0.182 | -2.260 |
| Rpn1          | -0.371 | 13.406 | -3.362 | 0.007 | 0.182 | -2.262 |
| 1700019L03Rik | 0.498  | 7.356  | 3.362  | 0.007 | 0.182 | -2.262 |
| Zfp703        | 0.660  | 10.935 | 3.362  | 0.007 | 0.182 | -2.263 |
| Ndufa7        | -0.261 | 10.146 | -3.361 | 0.007 | 0.182 | -2.264 |
| Tnfaip1       | 0.424  | 11.469 | 3.361  | 0.007 | 0.182 | -2.265 |
| Scpep1        | 0.713  | 10.098 | 3.360  | 0.007 | 0.182 | -2.265 |
| Pzp           | 0.906  | 7.379  | 3.357  | 0.007 | 0.183 | -2.270 |
| Sytl4         | -1.067 | 10.098 | -3.357 | 0.007 | 0.183 | -2.270 |
| H2-Oa         | 0.410  | 6.728  | 3.357  | 0.007 | 0.183 | -2.271 |
| 2810474019Rik | 0.539  | 10.446 | 3.356  | 0.007 | 0.183 | -2.271 |
| AC073561.3    | 1.121  | 7.202  | 3.356  | 0.007 | 0.183 | -2.271 |
| Celf5         | 0.545  | 7.092  | 3.355  | 0.007 | 0.183 | -2.274 |
| Gm11362       | -0.257 | 6.897  | -3.354 | 0.007 | 0.183 | -2.275 |
| Trmt2b        | -0.280 | 9.897  | -3.353 | 0.007 | 0.183 | -2.277 |
| Tns4          | 1.406  | 9.550  | 3.353  | 0.007 | 0.183 | -2.277 |
| Wscd1         | 0.228  | 7.059  | 3.349  | 0.007 | 0.184 | -2.283 |
| 1110003E01Rik | -0.629 | 12.677 | -3.348 | 0.007 | 0.184 | -2.285 |
| AC090489.2    | 0.301  | 6.502  | 3.347  | 0.007 | 0.184 | -2.286 |
| Gpr82         | 0.374  | 6.538  | 3.346  | 0.007 | 0.184 | -2.288 |
| Scn8a         | 0.775  | 7.353  | 3.345  | 0.007 | 0.184 | -2.289 |
| Dapk3         | -0.418 | 9.469  | -3.344 | 0.007 | 0.184 | -2.291 |
| Dscc1         | 0.335  | 7.566  | 3.344  | 0.007 | 0.184 | -2.291 |
| Runx3         | 0.500  | 7.258  | 3.339  | 0.008 | 0.186 | -2.299 |
| Lpgat1        | 1.253  | 11.657 | 3.338  | 0.008 | 0.186 | -2.300 |
| Rab27b        | -1.187 | 13.482 | -3.336 | 0.008 | 0.186 | -2.303 |
| Rchy1         | -0.277 | 10.313 | -3.336 | 0.008 | 0.186 | -2.303 |
| Rnaset2a      | -0.587 | 7.884  | -3.334 | 0.008 | 0.186 | -2.306 |
| Gtdc2         | -0.529 | 7.731  | -3.330 | 0.008 | 0.186 | -2.312 |
| Gm9115        | -0.357 | 7.825  | -3.330 | 0.008 | 0.186 | -2.312 |
| Klra2         | 0.639  | 7.567  | 3.330  | 0.008 | 0.186 | -2.313 |
| Cdca7         | 0.753  | 9.571  | 3.330  | 0.008 | 0.186 | -2.313 |
| Colec11       | -0.387 | 6.545  | -3.330 | 0.008 | 0.186 | -2.313 |

|               |        |        |        |       |       |        |
|---------------|--------|--------|--------|-------|-------|--------|
| Parvb         | 0.359  | 7.523  | 3.329  | 0.008 | 0.186 | -2.314 |
| Gm5549        | 0.831  | 7.218  | 3.329  | 0.008 | 0.186 | -2.314 |
| Elf1          | 0.207  | 11.474 | 3.328  | 0.008 | 0.186 | -2.317 |
| Amz1          | 0.434  | 7.360  | 3.326  | 0.008 | 0.186 | -2.319 |
| Ptpn2         | 0.362  | 10.824 | 3.326  | 0.008 | 0.186 | -2.319 |
| Cd274         | 0.443  | 7.820  | 3.326  | 0.008 | 0.186 | -2.320 |
| Cd16311       | 0.630  | 7.056  | 3.325  | 0.008 | 0.186 | -2.320 |
| 1700019B03Rik | -0.380 | 6.602  | -3.325 | 0.008 | 0.186 | -2.322 |
| Nostrin       | -0.573 | 10.989 | -3.324 | 0.008 | 0.186 | -2.322 |
| Psd4          | 0.342  | 10.539 | 3.323  | 0.008 | 0.186 | -2.324 |
| Frat1         | -0.467 | 7.224  | -3.319 | 0.008 | 0.187 | -2.330 |
| 1500031L02Rik | 0.493  | 9.509  | 3.319  | 0.008 | 0.187 | -2.331 |
| Ubash3b       | 0.546  | 8.289  | 3.319  | 0.008 | 0.187 | -2.331 |
| Tagap1        | 0.415  | 8.111  | 3.317  | 0.008 | 0.187 | -2.333 |
| Rps26         | -0.390 | 12.475 | -3.317 | 0.008 | 0.187 | -2.333 |
| 2010111I01Rik | 0.272  | 9.504  | 3.317  | 0.008 | 0.187 | -2.333 |
| Ddhd1         | 0.582  | 9.667  | 3.316  | 0.008 | 0.187 | -2.335 |
| Gm12860       | 0.485  | 7.312  | 3.315  | 0.008 | 0.187 | -2.337 |
| Cebpe         | 0.466  | 6.852  | 3.315  | 0.008 | 0.187 | -2.337 |
| Igdcc4        | -0.771 | 8.656  | -3.314 | 0.008 | 0.187 | -2.338 |
| 4930452B06Rik | -0.496 | 8.227  | -3.314 | 0.008 | 0.187 | -2.338 |
| Cntrob        | 0.359  | 8.236  | 3.314  | 0.008 | 0.187 | -2.338 |
| A930002H24Rik | 0.264  | 6.483  | 3.313  | 0.008 | 0.187 | -2.340 |
| Aim2          | 0.970  | 8.192  | 3.311  | 0.008 | 0.187 | -2.343 |
| Adrbk1        | -0.295 | 11.082 | -3.309 | 0.008 | 0.188 | -2.346 |
| Chd2          | 0.318  | 11.393 | 3.309  | 0.008 | 0.188 | -2.346 |
| Pura          | -0.364 | 12.176 | -3.308 | 0.008 | 0.188 | -2.348 |
| Zdhhc17       | 0.537  | 9.454  | 3.306  | 0.008 | 0.188 | -2.350 |
| Elmod1        | -0.340 | 6.521  | -3.306 | 0.008 | 0.188 | -2.351 |
| Ampd3         | -0.356 | 9.724  | -3.305 | 0.008 | 0.188 | -2.352 |
| Ormd12        | -0.583 | 10.323 | -3.305 | 0.008 | 0.188 | -2.353 |
| Dlg2          | -0.845 | 7.293  | -3.305 | 0.008 | 0.188 | -2.353 |
| Sntg2         | -0.841 | 7.649  | -3.304 | 0.008 | 0.188 | -2.354 |
| Mir17hg       | 0.330  | 8.574  | 3.302  | 0.008 | 0.188 | -2.357 |
| Esyt2         | -0.316 | 11.763 | -3.301 | 0.008 | 0.188 | -2.359 |
| Slc1a1        | 1.029  | 7.728  | 3.299  | 0.008 | 0.188 | -2.361 |
| 2510002D24Rik | -0.307 | 9.025  | -3.299 | 0.008 | 0.188 | -2.362 |
| B4galnt1      | -0.771 | 11.506 | -3.299 | 0.008 | 0.188 | -2.362 |
| Cd52          | 0.630  | 7.692  | 3.298  | 0.008 | 0.188 | -2.363 |
| Rps13         | -0.276 | 11.097 | -3.298 | 0.008 | 0.188 | -2.364 |
| Srcap         | 0.446  | 10.004 | 3.297  | 0.008 | 0.188 | -2.365 |
| Fam26e        | -0.464 | 7.358  | -3.297 | 0.008 | 0.188 | -2.366 |
| Pfkl          | 0.416  | 11.074 | 3.296  | 0.008 | 0.188 | -2.367 |
| Camsap3       | -0.765 | 10.581 | -3.295 | 0.008 | 0.188 | -2.368 |
| Rpl21-ps3     | -0.212 | 6.732  | -3.294 | 0.008 | 0.188 | -2.369 |
| Lypd1         | -0.288 | 7.022  | -3.291 | 0.008 | 0.189 | -2.375 |
| Zmat5         | -0.319 | 8.980  | -3.291 | 0.008 | 0.189 | -2.375 |
| 1110067D22Rik | -0.644 | 10.649 | -3.289 | 0.008 | 0.189 | -2.377 |
| Irf7          | 0.732  | 8.550  | 3.289  | 0.008 | 0.189 | -2.379 |
| Snrnp25       | -0.642 | 9.302  | -3.288 | 0.008 | 0.189 | -2.380 |

|               |        |        |        |       |       |        |
|---------------|--------|--------|--------|-------|-------|--------|
| 5430407P10Rik | -0.712 | 9.528  | -3.287 | 0.008 | 0.189 | -2.380 |
| Gm15344       | -0.653 | 7.959  | -3.287 | 0.008 | 0.189 | -2.381 |
| Snx4          | 0.284  | 11.539 | 3.287  | 0.008 | 0.189 | -2.381 |
| Emp1          | 2.085  | 13.662 | 3.286  | 0.008 | 0.189 | -2.383 |
| Tulp3         | 0.284  | 7.901  | 3.284  | 0.008 | 0.189 | -2.385 |
| Magt1         | -0.416 | 12.712 | -3.284 | 0.008 | 0.189 | -2.386 |
| Fcgbp         | 2.804  | 14.385 | 3.282  | 0.008 | 0.189 | -2.388 |
| Tcf7          | 0.268  | 7.749  | 3.282  | 0.008 | 0.189 | -2.389 |
| Cdk5rap3      | -0.365 | 11.489 | -3.282 | 0.008 | 0.189 | -2.389 |
| Dpysl4        | -0.355 | 6.688  | -3.281 | 0.008 | 0.189 | -2.391 |
| Ngb           | -1.257 | 7.338  | -3.281 | 0.008 | 0.189 | -2.391 |
| Tcergl1       | 0.314  | 6.544  | 3.281  | 0.008 | 0.189 | -2.391 |
| Csf2rb2       | 0.499  | 8.030  | 3.281  | 0.008 | 0.189 | -2.391 |
| Sult1c2       | -1.409 | 13.899 | -3.279 | 0.008 | 0.189 | -2.393 |
| Lrfn1         | -0.381 | 6.685  | -3.278 | 0.008 | 0.190 | -2.394 |
| A930016022Rik | -0.360 | 6.531  | -3.277 | 0.008 | 0.190 | -2.397 |
| Cd79a         | 1.318  | 7.448  | 3.277  | 0.008 | 0.190 | -2.397 |
| Wscd2         | -0.831 | 7.470  | -3.274 | 0.008 | 0.190 | -2.402 |
| Tmem189       | -1.342 | 11.413 | -3.273 | 0.008 | 0.190 | -2.404 |
| Apobr         | 0.729  | 7.737  | 3.273  | 0.008 | 0.190 | -2.404 |
| Gm11223       | 0.663  | 8.646  | 3.272  | 0.008 | 0.190 | -2.404 |
| Xlr           | 0.482  | 6.891  | 3.272  | 0.008 | 0.190 | -2.404 |
| Cldn7         | 2.507  | 10.589 | 3.272  | 0.008 | 0.190 | -2.405 |
| Dirc2         | 0.373  | 10.072 | 3.272  | 0.008 | 0.190 | -2.405 |
| Tcea3         | -0.693 | 9.442  | -3.272 | 0.008 | 0.190 | -2.405 |
| Fam103a1      | -0.296 | 11.154 | -3.271 | 0.008 | 0.190 | -2.406 |
| Tmem51        | -0.906 | 11.393 | -3.269 | 0.008 | 0.190 | -2.409 |
| Siglece       | 0.528  | 7.190  | 3.269  | 0.008 | 0.190 | -2.409 |
| I830077J02Rik | 0.461  | 6.984  | 3.268  | 0.008 | 0.190 | -2.411 |
| Grem2         | -0.732 | 9.306  | -3.267 | 0.008 | 0.190 | -2.412 |
| Trim30a       | 0.492  | 8.244  | 3.267  | 0.008 | 0.190 | -2.412 |
| Col5a3        | 0.738  | 8.732  | 3.264  | 0.009 | 0.191 | -2.418 |
| Bcl3          | 0.815  | 9.245  | 3.264  | 0.009 | 0.191 | -2.418 |
| Pfkm          | -0.462 | 9.522  | -3.263 | 0.009 | 0.191 | -2.419 |
| Arg1          | 1.202  | 8.097  | 3.263  | 0.009 | 0.191 | -2.419 |
| Akrlc14       | -1.770 | 12.602 | -3.260 | 0.009 | 0.191 | -2.423 |
| Ppip5k2       | 0.352  | 11.971 | 3.259  | 0.009 | 0.191 | -2.424 |
| Fam100a       | -0.413 | 9.129  | -3.259 | 0.009 | 0.191 | -2.425 |
| Cntn5         | -0.641 | 6.978  | -3.258 | 0.009 | 0.191 | -2.427 |
| Otud3         | 0.486  | 9.182  | 3.256  | 0.009 | 0.191 | -2.430 |
| Npb           | -0.543 | 6.754  | -3.256 | 0.009 | 0.191 | -2.430 |
| Pcdhb12       | 0.725  | 7.604  | 3.256  | 0.009 | 0.191 | -2.430 |
| Setd6         | -0.844 | 9.577  | -3.256 | 0.009 | 0.191 | -2.431 |
| Mmp2          | 0.865  | 9.931  | 3.251  | 0.009 | 0.193 | -2.438 |
| Mcm5          | 0.553  | 10.034 | 3.251  | 0.009 | 0.193 | -2.438 |
| Helq          | -0.258 | 8.510  | -3.250 | 0.009 | 0.193 | -2.440 |
| Ikzf1         | 0.548  | 7.861  | 3.249  | 0.009 | 0.193 | -2.442 |
| Plxna3        | -0.577 | 8.430  | -3.248 | 0.009 | 0.193 | -2.442 |
| Slc26a7       | -0.692 | 7.849  | -3.248 | 0.009 | 0.193 | -2.442 |
| Gm15694       | 0.335  | 6.613  | 3.248  | 0.009 | 0.193 | -2.443 |

|               |        |        |        |       |       |        |
|---------------|--------|--------|--------|-------|-------|--------|
| Igf1          | 0.790  | 10.083 | 3.247  | 0.009 | 0.193 | -2.445 |
| Psap11        | -3.306 | 12.260 | -3.246 | 0.009 | 0.193 | -2.445 |
| Clec4d        | 1.107  | 7.233  | 3.245  | 0.009 | 0.193 | -2.447 |
| 4933424M12Rik | 0.296  | 6.563  | 3.245  | 0.009 | 0.193 | -2.447 |
| Sestd1        | 0.375  | 10.624 | 3.245  | 0.009 | 0.193 | -2.447 |
| Bhlha15       | -0.910 | 8.388  | -3.245 | 0.009 | 0.193 | -2.448 |
| Gm10382       | 0.360  | 7.117  | 3.244  | 0.009 | 0.193 | -2.450 |
| Gjb4          | 0.419  | 6.606  | 3.243  | 0.009 | 0.193 | -2.451 |
| Ptpn7         | 0.586  | 7.359  | 3.242  | 0.009 | 0.193 | -2.451 |
| Gm14138       | -0.286 | 6.758  | -3.242 | 0.009 | 0.193 | -2.452 |
| Gm15935       | -0.541 | 6.815  | -3.241 | 0.009 | 0.193 | -2.454 |
| Tmem159       | 0.331  | 8.765  | 3.238  | 0.009 | 0.193 | -2.459 |
| I12rb         | 0.636  | 7.196  | 3.236  | 0.009 | 0.193 | -2.461 |
| Galnt1        | 0.506  | 12.737 | 3.235  | 0.009 | 0.193 | -2.463 |
| Srpx          | -0.496 | 7.840  | -3.235 | 0.009 | 0.193 | -2.464 |
| Gdpd3         | 0.930  | 8.712  | 3.234  | 0.009 | 0.193 | -2.465 |
| Taspl         | -0.457 | 9.098  | -3.234 | 0.009 | 0.193 | -2.466 |
| 2200002K05Rik | -0.832 | 10.540 | -3.233 | 0.009 | 0.193 | -2.466 |
| Gm13429       | -0.509 | 6.937  | -3.233 | 0.009 | 0.193 | -2.466 |
| Slc5a9        | 1.560  | 8.226  | 3.233  | 0.009 | 0.193 | -2.467 |
| Parp3         | 0.431  | 9.816  | 3.233  | 0.009 | 0.193 | -2.467 |
| Rapgef6       | 0.214  | 10.501 | 3.232  | 0.009 | 0.193 | -2.468 |
| Tnxb          | -0.810 | 9.229  | -3.232 | 0.009 | 0.193 | -2.468 |
| Clec5a        | 0.510  | 7.578  | 3.231  | 0.009 | 0.194 | -2.470 |
| 1300014I06Rik | 0.975  | 8.779  | 3.229  | 0.009 | 0.194 | -2.473 |
| AC027184.1    | -0.965 | 6.930  | -3.229 | 0.009 | 0.194 | -2.473 |
| Prdm9         | -1.047 | 9.704  | -3.224 | 0.009 | 0.195 | -2.480 |
| Mmp25         | 0.501  | 6.955  | 3.221  | 0.009 | 0.196 | -2.486 |
| 1700066M21Rik | -0.588 | 9.017  | -3.220 | 0.009 | 0.196 | -2.487 |
| Kcnk6         | -0.666 | 11.161 | -3.220 | 0.009 | 0.196 | -2.487 |
| Supt16h       | 0.238  | 11.861 | 3.220  | 0.009 | 0.196 | -2.488 |
| Sypl          | -0.383 | 13.153 | -3.219 | 0.009 | 0.196 | -2.488 |
| Eps811        | -0.995 | 9.430  | -3.216 | 0.009 | 0.197 | -2.493 |
| Elov15        | 0.841  | 10.159 | 3.216  | 0.009 | 0.197 | -2.494 |
| Trim40        | 2.240  | 8.420  | 3.214  | 0.009 | 0.197 | -2.496 |
| Arhgef25      | -0.734 | 8.600  | -3.213 | 0.009 | 0.197 | -2.498 |
| Rasef         | -1.060 | 12.467 | -3.213 | 0.009 | 0.197 | -2.498 |
| Vapa          | -0.262 | 12.382 | -3.212 | 0.009 | 0.197 | -2.500 |
| Atp10b        | 1.542  | 11.054 | 3.212  | 0.009 | 0.197 | -2.500 |
| Nkx6-3        | -0.594 | 12.115 | -3.212 | 0.009 | 0.197 | -2.500 |
| Gm14125       | 0.263  | 6.483  | 3.210  | 0.009 | 0.197 | -2.502 |
| 6330403A02Rik | -0.890 | 8.285  | -3.210 | 0.009 | 0.197 | -2.503 |
| Reep3         | 0.740  | 12.105 | 3.210  | 0.009 | 0.197 | -2.503 |
| Reep5         | -0.615 | 11.974 | -3.210 | 0.009 | 0.197 | -2.503 |
| Cxcr2         | 0.504  | 7.844  | 3.208  | 0.009 | 0.197 | -2.505 |
| Rgmb          | -0.632 | 9.678  | -3.208 | 0.009 | 0.197 | -2.506 |
| Wsb1          | 0.588  | 10.684 | 3.207  | 0.009 | 0.197 | -2.508 |
| Ical          | -0.618 | 10.810 | -3.206 | 0.009 | 0.197 | -2.509 |
| Slmo1         | -0.504 | 6.766  | -3.206 | 0.009 | 0.197 | -2.510 |
| Dnajb1        | -0.462 | 10.780 | -3.204 | 0.009 | 0.197 | -2.512 |

|               |        |        |        |       |       |        |
|---------------|--------|--------|--------|-------|-------|--------|
| Slain2        | -0.238 | 11.464 | -3.204 | 0.009 | 0.197 | -2.512 |
| Slitrk1       | -0.350 | 6.678  | -3.203 | 0.009 | 0.197 | -2.514 |
| Rrbp1         | -0.240 | 14.207 | -3.201 | 0.009 | 0.198 | -2.517 |
| El12          | -0.334 | 11.518 | -3.198 | 0.010 | 0.199 | -2.522 |
| Gas6          | -0.746 | 11.304 | -3.198 | 0.010 | 0.199 | -2.522 |
| 2010001K21Rik | -0.714 | 7.519  | -3.197 | 0.010 | 0.199 | -2.524 |
| Pcgf6         | 0.469  | 8.842  | 3.196  | 0.010 | 0.199 | -2.525 |
| Lsm6          | -0.528 | 10.597 | -3.193 | 0.010 | 0.199 | -2.530 |
| Rps9          | -0.363 | 13.815 | -3.192 | 0.010 | 0.199 | -2.531 |
| Slc22a17      | -0.529 | 7.763  | -3.191 | 0.010 | 0.199 | -2.533 |
| Abcc5         | -0.708 | 10.600 | -3.191 | 0.010 | 0.199 | -2.533 |
| Fzd4          | -0.550 | 9.962  | -3.190 | 0.010 | 0.199 | -2.534 |
| Socs4         | 0.470  | 11.554 | 3.190  | 0.010 | 0.199 | -2.534 |
| 9030619P08Rik | 0.615  | 6.883  | 3.190  | 0.010 | 0.199 | -2.535 |
| Nudt4         | 0.892  | 11.187 | 3.190  | 0.010 | 0.199 | -2.535 |
| Kcnj15        | -2.858 | 8.907  | -3.190 | 0.010 | 0.199 | -2.535 |
| Eral1         | -0.265 | 8.820  | -3.187 | 0.010 | 0.200 | -2.540 |
| Trem14        | 0.502  | 6.769  | 3.187  | 0.010 | 0.200 | -2.540 |
| Heg1          | 0.622  | 9.858  | 3.186  | 0.010 | 0.200 | -2.541 |
| Gm10052       | 0.376  | 8.633  | 3.186  | 0.010 | 0.200 | -2.541 |
| Ubl3          | -0.352 | 11.391 | -3.185 | 0.010 | 0.200 | -2.542 |
| Usol          | -0.308 | 12.524 | -3.185 | 0.010 | 0.200 | -2.543 |
| Kcnd1         | 0.344  | 7.103  | 3.185  | 0.010 | 0.200 | -2.543 |
| AC122807.1    | -0.308 | 10.414 | -3.185 | 0.010 | 0.200 | -2.543 |
| Wnt4          | 0.516  | 7.640  | 3.182  | 0.010 | 0.200 | -2.547 |
| Bloc1s1       | -0.296 | 8.877  | -3.182 | 0.010 | 0.200 | -2.548 |
| Eif1b         | -0.243 | 9.229  | -3.181 | 0.010 | 0.200 | -2.548 |
| Hcfc1         | 0.250  | 10.724 | 3.180  | 0.010 | 0.200 | -2.551 |
| Ppplr37       | -0.281 | 10.404 | -3.179 | 0.010 | 0.200 | -2.552 |
| Naa10         | -0.313 | 9.585  | -3.179 | 0.010 | 0.200 | -2.552 |
| Foxa2         | -1.029 | 9.406  | -3.179 | 0.010 | 0.200 | -2.552 |
| Vmp1          | 0.562  | 12.838 | 3.178  | 0.010 | 0.200 | -2.554 |
| Itm2a         | -0.425 | 8.269  | -3.177 | 0.010 | 0.200 | -2.555 |
| Rab8b         | 0.454  | 9.750  | 3.176  | 0.010 | 0.200 | -2.557 |
| I111ral       | -0.603 | 8.778  | -3.176 | 0.010 | 0.200 | -2.557 |
| Vcp-rs        | -0.777 | 11.091 | -3.175 | 0.010 | 0.200 | -2.558 |
| Pnmall        | -0.526 | 6.735  | -3.174 | 0.010 | 0.200 | -2.559 |
| Wac           | -0.277 | 11.652 | -3.174 | 0.010 | 0.200 | -2.560 |
| Lmo4          | -1.325 | 11.225 | -3.172 | 0.010 | 0.200 | -2.563 |
| Rccd1         | 0.460  | 8.102  | 3.172  | 0.010 | 0.200 | -2.563 |
| Snord70       | 0.238  | 6.470  | 3.172  | 0.010 | 0.200 | -2.563 |
| Nphs2         | -0.567 | 6.680  | -3.171 | 0.010 | 0.200 | -2.564 |
| Ndn           | -0.673 | 7.519  | -3.171 | 0.010 | 0.200 | -2.564 |
| Tmx4          | -0.481 | 10.505 | -3.170 | 0.010 | 0.200 | -2.566 |
| Mcmbp         | -0.470 | 10.827 | -3.170 | 0.010 | 0.200 | -2.566 |
| Ppplr15a      | 0.701  | 8.822  | 3.170  | 0.010 | 0.200 | -2.567 |
| Slc11a1       | 0.491  | 7.676  | 3.170  | 0.010 | 0.200 | -2.567 |
| C130074G19Rik | 1.508  | 10.797 | 3.170  | 0.010 | 0.200 | -2.567 |
| Ly9           | 0.570  | 7.313  | 3.168  | 0.010 | 0.200 | -2.569 |
| Hmgb3         | 0.535  | 9.419  | 3.168  | 0.010 | 0.200 | -2.570 |

|               |        |        |        |       |       |        |
|---------------|--------|--------|--------|-------|-------|--------|
| Piwil4        | -0.930 | 7.241  | -3.167 | 0.010 | 0.200 | -2.572 |
| Gngl1         | 0.355  | 8.358  | 3.166  | 0.010 | 0.200 | -2.573 |
| Lamtor2       | -0.438 | 10.685 | -3.165 | 0.010 | 0.200 | -2.574 |
| Rp2h          | 0.272  | 11.288 | 3.165  | 0.010 | 0.200 | -2.574 |
| Gm6286        | -0.328 | 7.493  | -3.165 | 0.010 | 0.200 | -2.574 |
| Cd209f        | -0.591 | 7.073  | -3.165 | 0.010 | 0.200 | -2.574 |
| Camk2b        | -0.789 | 7.927  | -3.164 | 0.010 | 0.200 | -2.577 |
| Ceacam2       | 0.556  | 7.321  | 3.164  | 0.010 | 0.200 | -2.577 |
| Bckdhh        | -0.647 | 8.656  | -3.163 | 0.010 | 0.200 | -2.577 |
| Ptpn21        | -0.586 | 9.572  | -3.163 | 0.010 | 0.200 | -2.578 |
| Bcat2         | -1.230 | 11.537 | -3.163 | 0.010 | 0.200 | -2.578 |
| Pank1         | -0.790 | 10.207 | -3.163 | 0.010 | 0.200 | -2.578 |
| Acta2         | -1.260 | 13.184 | -3.162 | 0.010 | 0.200 | -2.580 |
| Tmed2         | -0.387 | 14.135 | -3.161 | 0.010 | 0.200 | -2.580 |
| 4932418E24Rik | -0.405 | 6.554  | -3.161 | 0.010 | 0.200 | -2.580 |
| Dnajb9        | -0.502 | 11.565 | -3.160 | 0.010 | 0.200 | -2.583 |
| Dpy30         | -0.282 | 10.120 | -3.160 | 0.010 | 0.200 | -2.583 |
| Prpf4         | 0.463  | 9.476  | 3.159  | 0.010 | 0.200 | -2.583 |
| Numa1         | 0.257  | 11.681 | 3.159  | 0.010 | 0.200 | -2.584 |
| Rgs16         | 0.699  | 7.482  | 3.157  | 0.010 | 0.200 | -2.587 |
| Cnn1          | -1.944 | 11.499 | -3.156 | 0.010 | 0.201 | -2.589 |
| Lgals3bp      | 0.651  | 12.026 | 3.155  | 0.010 | 0.201 | -2.590 |
| Gmfb          | 0.579  | 11.802 | 3.154  | 0.010 | 0.201 | -2.592 |
| Efcab4a       | -0.600 | 10.161 | -3.153 | 0.010 | 0.201 | -2.593 |
| Eif1          | -0.337 | 11.752 | -3.153 | 0.010 | 0.201 | -2.593 |
| Myl9          | -1.558 | 12.083 | -3.150 | 0.010 | 0.202 | -2.598 |
| Hspb7         | -0.849 | 7.647  | -3.150 | 0.010 | 0.202 | -2.598 |
| Hcfclr1       | -0.437 | 9.880  | -3.149 | 0.010 | 0.202 | -2.599 |
| 2210011C24Rik | -1.025 | 8.103  | -3.148 | 0.010 | 0.202 | -2.602 |
| Fez2          | 0.529  | 9.570  | 3.146  | 0.010 | 0.202 | -2.604 |
| Ppif          | -1.300 | 10.785 | -3.145 | 0.010 | 0.203 | -2.605 |
| Dpm3          | -0.280 | 7.983  | -3.144 | 0.010 | 0.203 | -2.607 |
| Chaf1b        | 0.307  | 8.534  | 3.142  | 0.010 | 0.203 | -2.610 |
| Cerk          | 0.689  | 9.180  | 3.142  | 0.010 | 0.203 | -2.611 |
| Cep350        | -0.546 | 11.863 | -3.142 | 0.011 | 0.203 | -2.611 |
| Myold         | 0.326  | 11.827 | 3.141  | 0.011 | 0.203 | -2.612 |
| Fam70a        | -0.391 | 6.805  | -3.141 | 0.011 | 0.203 | -2.612 |
| Eml1          | -1.214 | 11.690 | -3.140 | 0.011 | 0.203 | -2.613 |
| Ttyh3         | 0.556  | 8.656  | 3.140  | 0.011 | 0.203 | -2.614 |
| Rab5b         | -0.425 | 12.334 | -3.140 | 0.011 | 0.203 | -2.614 |
| Prss27        | 0.746  | 7.072  | 3.138  | 0.011 | 0.203 | -2.618 |
| Gm14226       | 0.367  | 6.881  | 3.137  | 0.011 | 0.203 | -2.619 |
| Cyr61         | 0.588  | 8.578  | 3.135  | 0.011 | 0.204 | -2.621 |
| Zap70         | 0.527  | 6.910  | 3.133  | 0.011 | 0.204 | -2.624 |
| Epb4.1        | -0.350 | 12.251 | -3.133 | 0.011 | 0.204 | -2.625 |
| Sin3b         | -0.250 | 10.386 | -3.133 | 0.011 | 0.204 | -2.625 |
| Fam19a2       | -0.527 | 6.862  | -3.133 | 0.011 | 0.204 | -2.626 |
| Ltk           | -0.582 | 7.926  | -3.132 | 0.011 | 0.204 | -2.626 |
| Epas1         | 0.413  | 11.502 | 3.132  | 0.011 | 0.204 | -2.626 |
| Tex14         | 0.336  | 7.067  | 3.131  | 0.011 | 0.204 | -2.628 |

|               |        |        |        |       |       |        |
|---------------|--------|--------|--------|-------|-------|--------|
| S100a10       | 1.143  | 11.968 | 3.131  | 0.011 | 0.204 | -2.628 |
| Gstm2         | -1.093 | 11.716 | -3.130 | 0.011 | 0.204 | -2.631 |
| Dl14          | 0.350  | 8.026  | 3.129  | 0.011 | 0.204 | -2.632 |
| Acat3         | 0.520  | 7.082  | 3.128  | 0.011 | 0.204 | -2.632 |
| Egln3         | 1.005  | 10.934 | 3.128  | 0.011 | 0.204 | -2.634 |
| Scand1        | -0.324 | 8.966  | -3.127 | 0.011 | 0.204 | -2.634 |
| Slc25a30      | 0.354  | 8.180  | 3.127  | 0.011 | 0.204 | -2.635 |
| Abcg3         | 0.536  | 7.819  | 3.126  | 0.011 | 0.204 | -2.636 |
| Arhgef101     | 0.544  | 8.999  | 3.126  | 0.011 | 0.204 | -2.636 |
| Rpl27a        | -0.253 | 12.344 | -3.126 | 0.011 | 0.204 | -2.637 |
| Lyn           | 0.380  | 10.700 | 3.126  | 0.011 | 0.204 | -2.637 |
| Gimap4        | 0.690  | 8.708  | 3.126  | 0.011 | 0.204 | -2.637 |
| Slc25a21      | -0.347 | 6.854  | -3.125 | 0.011 | 0.204 | -2.637 |
| Rnd1          | 0.245  | 7.333  | 3.124  | 0.011 | 0.204 | -2.639 |
| Gadd45g       | -0.372 | 8.458  | -3.122 | 0.011 | 0.204 | -2.642 |
| Onecut2       | 3.153  | 11.274 | 3.122  | 0.011 | 0.204 | -2.642 |
| Tmem106b      | -0.489 | 11.734 | -3.122 | 0.011 | 0.204 | -2.643 |
| Gm14137       | 0.455  | 7.506  | 3.120  | 0.011 | 0.204 | -2.645 |
| Rbm41         | 0.282  | 8.694  | 3.120  | 0.011 | 0.204 | -2.645 |
| Slc25a14      | -0.401 | 8.831  | -3.120 | 0.011 | 0.204 | -2.646 |
| I134          | 0.492  | 7.922  | 3.118  | 0.011 | 0.205 | -2.649 |
| Sec22a        | -0.311 | 9.543  | -3.117 | 0.011 | 0.205 | -2.650 |
| 2810403A07Rik | -0.219 | 10.938 | -3.117 | 0.011 | 0.205 | -2.651 |
| Abca8b        | -0.652 | 7.963  | -3.117 | 0.011 | 0.205 | -2.651 |
| Adam12        | 0.618  | 7.391  | 3.116  | 0.011 | 0.205 | -2.653 |
| Spns3         | 0.463  | 6.873  | 3.115  | 0.011 | 0.205 | -2.653 |
| Gm12158       | 0.354  | 7.287  | 3.113  | 0.011 | 0.205 | -2.657 |
| Tnks          | 0.234  | 10.333 | 3.113  | 0.011 | 0.205 | -2.657 |
| Traf3ip3      | 0.483  | 7.273  | 3.113  | 0.011 | 0.205 | -2.657 |
| Npr12         | -0.337 | 8.629  | -3.112 | 0.011 | 0.205 | -2.658 |
| Rnf146        | -0.204 | 10.400 | -3.111 | 0.011 | 0.205 | -2.660 |
| Samd8         | -0.729 | 12.188 | -3.110 | 0.011 | 0.205 | -2.662 |
| Cops8         | 0.224  | 10.212 | 3.110  | 0.011 | 0.205 | -2.663 |
| Gopc          | -0.318 | 10.345 | -3.109 | 0.011 | 0.205 | -2.663 |
| A630001G21Rik | 0.413  | 7.231  | 3.109  | 0.011 | 0.205 | -2.663 |
| Arhgef6       | 0.314  | 8.686  | 3.109  | 0.011 | 0.205 | -2.663 |
| Frrs1         | 0.417  | 9.315  | 3.108  | 0.011 | 0.205 | -2.665 |
| Txndc5        | -0.475 | 13.561 | -3.108 | 0.011 | 0.205 | -2.665 |
| Syt13         | 0.355  | 7.124  | 3.108  | 0.011 | 0.205 | -2.665 |
| I123a         | 0.300  | 6.501  | 3.107  | 0.011 | 0.205 | -2.666 |
| Reg3g         | 3.155  | 9.969  | 3.107  | 0.011 | 0.205 | -2.666 |
| Duox2         | 1.513  | 11.185 | 3.106  | 0.011 | 0.205 | -2.669 |
| Igkv13-84     | 0.772  | 7.060  | 3.105  | 0.011 | 0.205 | -2.669 |
| Ighv1-73      | 0.481  | 6.592  | 3.105  | 0.011 | 0.205 | -2.670 |
| Vill          | -2.012 | 11.942 | -3.102 | 0.011 | 0.206 | -2.674 |
| Bhlhe40       | 0.792  | 10.851 | 3.102  | 0.011 | 0.206 | -2.674 |
| Sirpblc       | 0.379  | 6.706  | 3.101  | 0.011 | 0.206 | -2.676 |
| Kif15         | 0.509  | 9.101  | 3.101  | 0.011 | 0.206 | -2.676 |
| Slfn4         | 1.022  | 8.384  | 3.100  | 0.011 | 0.206 | -2.678 |
| Tlr7          | 0.345  | 7.573  | 3.100  | 0.011 | 0.206 | -2.678 |



|               |        |        |        |       |       |        |
|---------------|--------|--------|--------|-------|-------|--------|
| Slc9a3r2      | -0.818 | 9.834  | -3.100 | 0.011 | 0.206 | -2.678 |
| Ptgir         | 0.422  | 7.503  | 3.099  | 0.011 | 0.206 | -2.679 |
| Ccdc3         | -0.646 | 8.476  | -3.098 | 0.011 | 0.206 | -2.680 |
| Elovl6        | 1.393  | 11.964 | 3.096  | 0.011 | 0.207 | -2.683 |
| Gpr116        | 0.517  | 9.826  | 3.094  | 0.011 | 0.208 | -2.688 |
| Ppp1cb        | -0.309 | 13.938 | -3.093 | 0.011 | 0.208 | -2.689 |
| Neur11b       | 0.412  | 8.367  | 3.092  | 0.011 | 0.208 | -2.690 |
| Mygl          | -0.268 | 9.773  | -3.091 | 0.011 | 0.208 | -2.693 |
| Ralb          | -0.474 | 11.675 | -3.090 | 0.011 | 0.208 | -2.694 |
| Pax9          | 1.043  | 7.398  | 3.088  | 0.012 | 0.208 | -2.697 |
| Gm12977       | 0.274  | 6.616  | 3.088  | 0.012 | 0.208 | -2.697 |
| Tmem181a      | -0.250 | 9.636  | -3.088 | 0.012 | 0.208 | -2.697 |
| Swi5          | -0.250 | 11.051 | -3.086 | 0.012 | 0.208 | -2.700 |
| Mir5109       | -0.798 | 6.981  | -3.085 | 0.012 | 0.208 | -2.701 |
| 1110008J03Rik | -0.701 | 8.482  | -3.085 | 0.012 | 0.208 | -2.702 |
| E130308A19Rik | -0.216 | 8.166  | -3.084 | 0.012 | 0.208 | -2.703 |
| Klh19         | -0.348 | 11.497 | -3.083 | 0.012 | 0.208 | -2.704 |
| Osbp2         | 0.590  | 7.124  | 3.082  | 0.012 | 0.208 | -2.706 |
| Rnft1         | -0.363 | 11.270 | -3.082 | 0.012 | 0.208 | -2.706 |
| Car3          | -2.227 | 7.788  | -3.082 | 0.012 | 0.208 | -2.707 |
| Arf1          | -0.218 | 13.946 | -3.081 | 0.012 | 0.208 | -2.708 |
| E130012A19Rik | -0.964 | 8.925  | -3.081 | 0.012 | 0.208 | -2.708 |
| Nfxl1         | -0.229 | 9.947  | -3.081 | 0.012 | 0.208 | -2.709 |
| Zfp831        | 0.357  | 6.642  | 3.080  | 0.012 | 0.208 | -2.709 |
| Prrg3         | -0.552 | 7.209  | -3.080 | 0.012 | 0.208 | -2.710 |
| Adora3        | 0.369  | 6.749  | 3.079  | 0.012 | 0.208 | -2.711 |
| Ehd4          | -0.547 | 11.211 | -3.079 | 0.012 | 0.208 | -2.711 |
| Prdm15        | -0.288 | 8.779  | -3.079 | 0.012 | 0.208 | -2.711 |
| Gpr30         | -0.459 | 6.667  | -3.079 | 0.012 | 0.208 | -2.712 |
| Stxbp6        | -0.729 | 10.056 | -3.078 | 0.012 | 0.208 | -2.712 |
| Gm867         | 0.263  | 6.483  | 3.078  | 0.012 | 0.208 | -2.712 |
| Fam49b        | 0.309  | 9.855  | 3.078  | 0.012 | 0.208 | -2.713 |
| Ppp2r2b       | -0.745 | 7.096  | -3.076 | 0.012 | 0.209 | -2.715 |
| A830036E02Rik | 0.512  | 7.008  | 3.076  | 0.012 | 0.209 | -2.716 |
| Slc6a17       | -0.925 | 7.615  | -3.075 | 0.012 | 0.209 | -2.718 |
| Nlrp10        | 0.428  | 7.498  | 3.074  | 0.012 | 0.209 | -2.719 |
| Tipin         | 0.309  | 8.927  | 3.074  | 0.012 | 0.209 | -2.720 |
| 5430427019Rik | 0.283  | 6.945  | 3.073  | 0.012 | 0.209 | -2.720 |
| Dhrs9         | -1.104 | 8.845  | -3.072 | 0.012 | 0.209 | -2.722 |
| Stom          | 0.942  | 10.409 | 3.071  | 0.012 | 0.210 | -2.724 |
| Inad1         | 0.357  | 11.442 | 3.071  | 0.012 | 0.210 | -2.724 |
| Itm2b         | -0.387 | 14.035 | -3.070 | 0.012 | 0.210 | -2.725 |
| Pcsk2         | -0.958 | 7.970  | -3.068 | 0.012 | 0.210 | -2.728 |
| Prr16         | 0.366  | 7.350  | 3.068  | 0.012 | 0.210 | -2.729 |
| A930039A15Rik | -0.331 | 6.856  | -3.067 | 0.012 | 0.210 | -2.730 |
| Masp1         | 0.803  | 7.465  | 3.067  | 0.012 | 0.210 | -2.730 |
| Tulp4         | 0.198  | 11.645 | 3.067  | 0.012 | 0.210 | -2.731 |
| 1810022K09Rik | -0.360 | 9.343  | -3.067 | 0.012 | 0.210 | -2.731 |
| Fgr           | 0.902  | 7.498  | 3.066  | 0.012 | 0.210 | -2.732 |
| Per1          | -0.799 | 9.065  | -3.066 | 0.012 | 0.210 | -2.733 |

|               |        |        |        |       |       |        |
|---------------|--------|--------|--------|-------|-------|--------|
| Itpr2         | 0.885  | 10.549 | 3.065  | 0.012 | 0.210 | -2.734 |
| Tubb2a        | 0.806  | 10.239 | 3.064  | 0.012 | 0.210 | -2.735 |
| Ppp1r18       | 0.377  | 8.633  | 3.064  | 0.012 | 0.210 | -2.735 |
| Slc39a4       | 0.970  | 11.152 | 3.062  | 0.012 | 0.210 | -2.738 |
| Ccdc122       | 0.422  | 7.920  | 3.062  | 0.012 | 0.210 | -2.738 |
| AC158673.1    | 0.888  | 7.089  | 3.061  | 0.012 | 0.210 | -2.740 |
| Il17rb        | 0.392  | 7.676  | 3.061  | 0.012 | 0.210 | -2.740 |
| Vamp2         | -0.404 | 10.690 | -3.060 | 0.012 | 0.210 | -2.741 |
| Gpsm3         | 0.350  | 7.690  | 3.059  | 0.012 | 0.210 | -2.743 |
| Zfp523        | -0.264 | 8.509  | -3.059 | 0.012 | 0.210 | -2.743 |
| Abcg1         | 0.537  | 8.016  | 3.058  | 0.012 | 0.210 | -2.744 |
| Frzb          | 0.545  | 7.418  | 3.058  | 0.012 | 0.210 | -2.745 |
| Rassf5        | 0.426  | 7.764  | 3.057  | 0.012 | 0.210 | -2.746 |
| Pla2g2e       | 0.491  | 6.700  | 3.057  | 0.012 | 0.210 | -2.746 |
| Gla           | 0.284  | 9.291  | 3.056  | 0.012 | 0.210 | -2.748 |
| Myom1         | -1.047 | 8.994  | -3.056 | 0.012 | 0.210 | -2.748 |
| Gm14454       | 0.244  | 6.473  | 3.055  | 0.012 | 0.210 | -2.749 |
| Ly6c2         | 1.080  | 7.572  | 3.055  | 0.012 | 0.210 | -2.749 |
| Gstpl         | -0.755 | 11.292 | -3.055 | 0.012 | 0.210 | -2.750 |
| 7-Mar         | 0.348  | 11.514 | 3.054  | 0.012 | 0.210 | -2.751 |
| Ism1          | -0.421 | 6.949  | -3.053 | 0.012 | 0.210 | -2.752 |
| 2410004A20Rik | -0.571 | 7.214  | -3.053 | 0.012 | 0.210 | -2.752 |
| Tmem131       | 0.470  | 11.282 | 3.053  | 0.012 | 0.210 | -2.753 |
| Cd82          | -0.363 | 12.384 | -3.053 | 0.012 | 0.210 | -2.753 |
| Klra5         | 0.587  | 6.645  | 3.052  | 0.012 | 0.210 | -2.754 |
| Scnn1g        | -1.356 | 8.172  | -3.048 | 0.012 | 0.212 | -2.760 |
| Kctd15        | -0.705 | 8.294  | -3.047 | 0.012 | 0.212 | -2.762 |
| Gm1574        | -0.539 | 6.778  | -3.045 | 0.012 | 0.212 | -2.765 |
| Fnip2         | -0.547 | 9.759  | -3.045 | 0.012 | 0.212 | -2.766 |
| Plagl1        | -0.727 | 9.458  | -3.044 | 0.012 | 0.212 | -2.766 |
| Emp3          | 0.304  | 7.907  | 3.042  | 0.012 | 0.213 | -2.770 |
| Dad1          | -0.312 | 10.628 | -3.042 | 0.012 | 0.213 | -2.770 |
| Cyp2s1        | -1.460 | 12.364 | -3.042 | 0.012 | 0.213 | -2.771 |
| H2-Q10        | 0.833  | 7.965  | 3.042  | 0.012 | 0.213 | -2.771 |
| Gm2016        | -0.407 | 6.751  | -3.041 | 0.012 | 0.213 | -2.771 |
| Exoc5         | -0.426 | 11.471 | -3.040 | 0.012 | 0.213 | -2.773 |
| Ppp2r1b       | -0.450 | 10.432 | -3.040 | 0.013 | 0.213 | -2.774 |
| Tnn           | -1.476 | 8.376  | -3.039 | 0.013 | 0.213 | -2.775 |
| Xrn2          | 0.272  | 11.343 | 3.039  | 0.013 | 0.213 | -2.775 |
| Tgfb1         | 0.663  | 8.245  | 3.039  | 0.013 | 0.213 | -2.775 |
| Fam190a       | -0.519 | 8.970  | -3.038 | 0.013 | 0.213 | -2.776 |
| Gm15609       | 0.400  | 6.552  | 3.037  | 0.013 | 0.213 | -2.777 |
| Zcchc14       | 0.262  | 9.791  | 3.037  | 0.013 | 0.213 | -2.778 |
| Fam82a1       | -0.475 | 9.055  | -3.037 | 0.013 | 0.213 | -2.778 |
| Gm6316        | 0.485  | 8.773  | 3.035  | 0.013 | 0.213 | -2.782 |
| Gm12867       | -0.387 | 6.647  | -3.034 | 0.013 | 0.213 | -2.782 |
| Gast          | -2.195 | 8.225  | -3.033 | 0.013 | 0.214 | -2.784 |
| Reg3b         | 3.669  | 10.540 | 3.033  | 0.013 | 0.214 | -2.785 |
| Ptafr         | 0.555  | 7.884  | 3.032  | 0.013 | 0.214 | -2.786 |
| Reep6         | 1.196  | 8.885  | 3.031  | 0.013 | 0.214 | -2.787 |

|               |        |        |        |       |       |        |
|---------------|--------|--------|--------|-------|-------|--------|
| Gm11019       | 0.365  | 6.589  | 3.030  | 0.013 | 0.214 | -2.790 |
| Scnn1b        | -1.259 | 8.111  | -3.027 | 0.013 | 0.215 | -2.794 |
| Ctsk          | 0.577  | 8.614  | 3.026  | 0.013 | 0.215 | -2.796 |
| Cask          | -0.226 | 11.509 | -3.025 | 0.013 | 0.215 | -2.797 |
| Kazald1       | -0.706 | 7.977  | -3.025 | 0.013 | 0.215 | -2.797 |
| Rilpl2        | 0.523  | 8.819  | 3.025  | 0.013 | 0.215 | -2.798 |
| Stim2         | -0.365 | 11.157 | -3.025 | 0.013 | 0.215 | -2.798 |
| Ccl6          | 1.728  | 9.804  | 3.023  | 0.013 | 0.216 | -2.801 |
| Cep192        | 0.356  | 9.905  | 3.021  | 0.013 | 0.216 | -2.803 |
| Ext1          | 0.505  | 10.121 | 3.021  | 0.013 | 0.216 | -2.804 |
| Pllp          | -1.211 | 11.265 | -3.020 | 0.013 | 0.216 | -2.805 |
| Tfpi2         | 0.509  | 6.972  | 3.020  | 0.013 | 0.216 | -2.805 |
| Pdxk          | 0.808  | 10.095 | 3.018  | 0.013 | 0.217 | -2.808 |
| Ptpre         | 0.434  | 8.963  | 3.018  | 0.013 | 0.217 | -2.809 |
| Surf1         | -0.317 | 10.197 | -3.017 | 0.013 | 0.217 | -2.810 |
| BC029722      | -0.283 | 8.570  | -3.015 | 0.013 | 0.217 | -2.813 |
| Gm11201       | 0.449  | 6.576  | 3.015  | 0.013 | 0.217 | -2.813 |
| Ephb2         | 0.915  | 10.147 | 3.014  | 0.013 | 0.217 | -2.815 |
| Doc2g         | -0.254 | 7.115  | -3.014 | 0.013 | 0.217 | -2.815 |
| Plagl2        | 0.268  | 9.829  | 3.014  | 0.013 | 0.217 | -2.815 |
| Capn13        | -1.392 | 10.741 | -3.013 | 0.013 | 0.217 | -2.817 |
| Gcnt4         | 1.301  | 9.079  | 3.012  | 0.013 | 0.217 | -2.818 |
| Pcdhb21       | 0.278  | 7.102  | 3.011  | 0.013 | 0.217 | -2.819 |
| Rps6-ps1      | -0.291 | 6.710  | -3.010 | 0.013 | 0.218 | -2.821 |
| Syt12         | 0.558  | 8.257  | 3.010  | 0.013 | 0.218 | -2.822 |
| Arrdc1        | -0.731 | 10.550 | -3.008 | 0.013 | 0.218 | -2.824 |
| Cyrr1         | 0.514  | 8.560  | 3.008  | 0.013 | 0.218 | -2.824 |
| D930015E06Rik | -0.579 | 9.545  | -3.007 | 0.013 | 0.218 | -2.825 |
| Aif1          | 0.506  | 8.094  | 3.007  | 0.013 | 0.218 | -2.826 |
| Selk          | -0.491 | 12.076 | -3.006 | 0.013 | 0.218 | -2.827 |
| Creb3         | -0.416 | 11.610 | -3.005 | 0.013 | 0.218 | -2.829 |
| 5930403N24Rik | -0.413 | 7.108  | -3.005 | 0.013 | 0.218 | -2.829 |
| Esyt3         | -0.588 | 7.798  | -3.004 | 0.013 | 0.219 | -2.831 |
| Prpf31        | 0.341  | 10.518 | 3.003  | 0.013 | 0.219 | -2.832 |
| Golga4        | -0.270 | 13.643 | -3.003 | 0.013 | 0.219 | -2.833 |
| Adam33        | -1.020 | 7.290  | -3.003 | 0.013 | 0.219 | -2.833 |
| Zfp324        | -0.372 | 8.527  | -3.001 | 0.013 | 0.219 | -2.835 |
| Tnfrsf1a      | 0.272  | 10.968 | 3.001  | 0.013 | 0.219 | -2.835 |
| Oca2          | -0.306 | 6.536  | -3.001 | 0.013 | 0.219 | -2.836 |
| Sparc         | 0.777  | 12.746 | 3.000  | 0.013 | 0.219 | -2.837 |
| Nfkb1         | 0.300  | 10.472 | 2.999  | 0.013 | 0.219 | -2.839 |
| Cntd1         | 0.313  | 6.835  | 2.999  | 0.013 | 0.219 | -2.839 |
| Ms4a1         | 0.414  | 6.558  | 2.998  | 0.013 | 0.219 | -2.840 |
| Rasgrp4       | 0.393  | 7.333  | 2.997  | 0.013 | 0.219 | -2.842 |
| Ivd           | -0.530 | 10.220 | -2.997 | 0.013 | 0.219 | -2.842 |
| 2700060E02Rik | -0.409 | 10.079 | -2.997 | 0.013 | 0.219 | -2.842 |
| Slc14a1       | 0.542  | 7.121  | 2.997  | 0.013 | 0.219 | -2.842 |
| Sh3rf2        | -0.970 | 9.580  | -2.996 | 0.013 | 0.219 | -2.843 |
| Ctxn3         | -0.739 | 7.652  | -2.996 | 0.013 | 0.219 | -2.844 |
| Ube2q1        | -0.214 | 10.778 | -2.994 | 0.013 | 0.219 | -2.846 |

|               |        |        |        |       |       |        |
|---------------|--------|--------|--------|-------|-------|--------|
| Psca          | -4.401 | 13.629 | -2.994 | 0.013 | 0.219 | -2.846 |
| Mob1b         | -0.208 | 11.921 | -2.994 | 0.014 | 0.219 | -2.846 |
| Gmppa         | -0.262 | 10.264 | -2.994 | 0.014 | 0.219 | -2.846 |
| Bap1          | 0.243  | 10.088 | 2.994  | 0.014 | 0.219 | -2.846 |
| Huwe1         | 0.268  | 12.639 | 2.993  | 0.014 | 0.219 | -2.848 |
| Sema6b        | 0.436  | 7.821  | 2.993  | 0.014 | 0.219 | -2.848 |
| Zfp202        | 0.312  | 7.458  | 2.992  | 0.014 | 0.219 | -2.849 |
| Mrc2          | 0.436  | 8.215  | 2.992  | 0.014 | 0.219 | -2.850 |
| Fgfbp1        | -1.697 | 9.709  | -2.990 | 0.014 | 0.219 | -2.853 |
| Cot11         | -1.236 | 11.790 | -2.989 | 0.014 | 0.219 | -2.855 |
| Uba52         | -0.280 | 10.113 | -2.989 | 0.014 | 0.219 | -2.855 |
| Epcam         | 1.103  | 14.523 | 2.988  | 0.014 | 0.219 | -2.855 |
| Ankrd28       | 0.459  | 10.602 | 2.988  | 0.014 | 0.219 | -2.856 |
| Maml2         | 0.555  | 8.010  | 2.988  | 0.014 | 0.219 | -2.856 |
| Tmem41b       | -0.316 | 10.773 | -2.987 | 0.014 | 0.219 | -2.857 |
| Mcm9          | 0.385  | 8.730  | 2.987  | 0.014 | 0.219 | -2.857 |
| 1700071M16Rik | 0.416  | 6.875  | 2.987  | 0.014 | 0.219 | -2.858 |
| Grip2         | 0.278  | 6.777  | 2.986  | 0.014 | 0.220 | -2.860 |
| Atp8b1        | -0.429 | 13.705 | -2.985 | 0.014 | 0.220 | -2.860 |
| 1810007I06Rik | -0.945 | 8.004  | -2.985 | 0.014 | 0.220 | -2.861 |
| AI462493      | -0.464 | 9.455  | -2.985 | 0.014 | 0.220 | -2.861 |
| Socs2         | 0.502  | 10.304 | 2.984  | 0.014 | 0.220 | -2.863 |
| 2410015M20Rik | -0.266 | 10.723 | -2.983 | 0.014 | 0.220 | -2.864 |
| Prune         | 0.350  | 9.510  | 2.983  | 0.014 | 0.220 | -2.864 |
| Plscr4        | -0.282 | 8.085  | -2.982 | 0.014 | 0.220 | -2.865 |
| Dynlrb1       | -0.400 | 11.822 | -2.982 | 0.014 | 0.220 | -2.866 |
| Znrclas       | -0.361 | 8.561  | -2.981 | 0.014 | 0.220 | -2.867 |
| Pcdh12        | 0.454  | 7.679  | 2.979  | 0.014 | 0.221 | -2.871 |
| Atxn11        | 0.253  | 10.470 | 2.979  | 0.014 | 0.221 | -2.871 |
| Mk11          | -0.466 | 9.324  | -2.977 | 0.014 | 0.221 | -2.873 |
| Mup14         | -0.434 | 6.812  | -2.976 | 0.014 | 0.221 | -2.876 |
| Gpc3          | -1.110 | 7.972  | -2.975 | 0.014 | 0.221 | -2.877 |
| Chm           | 0.203  | 10.297 | 2.974  | 0.014 | 0.221 | -2.878 |
| Them5         | -0.436 | 6.760  | -2.974 | 0.014 | 0.221 | -2.878 |
| Tmem71        | 0.559  | 7.780  | 2.974  | 0.014 | 0.221 | -2.879 |
| Tmem246       | -0.885 | 9.735  | -2.973 | 0.014 | 0.221 | -2.880 |
| Arhgef16      | -0.360 | 10.864 | -2.973 | 0.014 | 0.221 | -2.881 |
| Mccc2         | -0.398 | 9.802  | -2.973 | 0.014 | 0.221 | -2.881 |
| Cdk8          | -0.244 | 10.930 | -2.972 | 0.014 | 0.221 | -2.881 |
| Pcdh10        | 0.563  | 6.633  | 2.972  | 0.014 | 0.221 | -2.882 |
| Gm15727       | 0.302  | 6.711  | 2.971  | 0.014 | 0.221 | -2.883 |
| Fam102a       | -0.313 | 11.520 | -2.971 | 0.014 | 0.221 | -2.883 |
| Ctsz          | 0.530  | 11.888 | 2.970  | 0.014 | 0.221 | -2.884 |
| Gata4         | -0.691 | 12.215 | -2.970 | 0.014 | 0.221 | -2.884 |
| Gm17384       | -0.950 | 7.414  | -2.970 | 0.014 | 0.221 | -2.885 |
| Dolpp1        | -0.341 | 9.669  | -2.970 | 0.014 | 0.221 | -2.885 |
| Slx1b         | -0.298 | 8.409  | -2.969 | 0.014 | 0.221 | -2.887 |
| Lilra6        | 0.279  | 6.950  | 2.968  | 0.014 | 0.222 | -2.888 |
| Hist2h2be     | -0.427 | 8.925  | -2.966 | 0.014 | 0.222 | -2.891 |
| Tmem26        | 0.461  | 7.089  | 2.965  | 0.014 | 0.222 | -2.892 |

|               |        |        |        |       |       |        |
|---------------|--------|--------|--------|-------|-------|--------|
| Mcpt2         | 1.377  | 10.876 | 2.964  | 0.014 | 0.222 | -2.894 |
| 1110059E24Rik | 0.226  | 9.949  | 2.963  | 0.014 | 0.223 | -2.896 |
| Gpr20         | -0.488 | 7.394  | -2.963 | 0.014 | 0.223 | -2.896 |
| St3gal4       | 2.129  | 11.476 | 2.962  | 0.014 | 0.223 | -2.897 |
| Glul          | -0.965 | 13.531 | -2.961 | 0.014 | 0.223 | -2.899 |
| Irak2         | 0.547  | 9.696  | 2.960  | 0.014 | 0.223 | -2.901 |
| Gm9000        | -2.149 | 9.247  | -2.960 | 0.014 | 0.223 | -2.902 |
| Dysf          | 0.362  | 8.837  | 2.959  | 0.014 | 0.223 | -2.902 |
| Gm14403       | 0.248  | 7.468  | 2.959  | 0.014 | 0.223 | -2.903 |
| Agfg2         | 0.343  | 9.053  | 2.959  | 0.014 | 0.223 | -2.903 |
| Tnnt2         | 0.533  | 7.399  | 2.958  | 0.014 | 0.223 | -2.904 |
| Fut7          | 0.237  | 6.515  | 2.957  | 0.014 | 0.223 | -2.906 |
| 5330430P22Rik | 0.305  | 6.802  | 2.956  | 0.014 | 0.223 | -2.907 |
| Tnfrsf13b     | 0.624  | 7.569  | 2.956  | 0.014 | 0.223 | -2.907 |
| Gbp4          | 0.396  | 7.955  | 2.956  | 0.014 | 0.223 | -2.908 |
| Tesc          | -1.214 | 10.263 | -2.956 | 0.014 | 0.223 | -2.908 |
| Sowahc        | -0.570 | 10.387 | -2.955 | 0.014 | 0.223 | -2.908 |
| Fam3b         | -0.740 | 12.782 | -2.954 | 0.014 | 0.223 | -2.910 |
| 9030625A04Rik | 0.551  | 7.915  | 2.953  | 0.014 | 0.223 | -2.912 |
| Havcr2        | 0.494  | 7.676  | 2.952  | 0.015 | 0.223 | -2.913 |
| Wnt11         | -0.999 | 8.679  | -2.952 | 0.015 | 0.223 | -2.913 |
| Hcrtr1        | -0.387 | 6.577  | -2.952 | 0.015 | 0.223 | -2.913 |
| Plce1         | -0.734 | 10.939 | -2.952 | 0.015 | 0.223 | -2.914 |
| Cyplal        | 1.784  | 7.450  | 2.952  | 0.015 | 0.223 | -2.914 |
| Plekhb1       | -0.495 | 8.677  | -2.951 | 0.015 | 0.223 | -2.914 |
| Trp53         | 0.362  | 9.326  | 2.951  | 0.015 | 0.223 | -2.916 |
| Bnip1         | -1.231 | 9.187  | -2.951 | 0.015 | 0.223 | -2.916 |
| Ankrd37       | 1.474  | 8.197  | 2.950  | 0.015 | 0.223 | -2.917 |
| Oas1b         | -0.352 | 7.402  | -2.950 | 0.015 | 0.223 | -2.917 |
| Tmem184a      | -0.645 | 10.454 | -2.949 | 0.015 | 0.223 | -2.918 |
| Jmjd8         | -0.361 | 10.084 | -2.949 | 0.015 | 0.223 | -2.918 |
| Col13a1       | 0.340  | 8.129  | 2.949  | 0.015 | 0.223 | -2.919 |
| Pou4f1        | 0.429  | 6.793  | 2.948  | 0.015 | 0.223 | -2.919 |
| Cep170        | 0.384  | 8.803  | 2.947  | 0.015 | 0.224 | -2.921 |
| Renbp         | 0.340  | 7.835  | 2.947  | 0.015 | 0.224 | -2.921 |
| Col5a2        | 0.910  | 11.388 | 2.947  | 0.015 | 0.224 | -2.922 |
| Dhx35         | 0.436  | 8.236  | 2.946  | 0.015 | 0.224 | -2.923 |
| Lgals12       | -1.081 | 10.998 | -2.945 | 0.015 | 0.224 | -2.925 |
| Myo5c         | -0.955 | 12.703 | -2.945 | 0.015 | 0.224 | -2.925 |
| Grap          | 0.323  | 7.439  | 2.944  | 0.015 | 0.224 | -2.927 |
| Mtmr6         | -0.575 | 12.049 | -2.943 | 0.015 | 0.224 | -2.927 |
| Tlr12         | 0.508  | 7.188  | 2.942  | 0.015 | 0.224 | -2.929 |
| Cpxm2         | -0.732 | 8.249  | -2.941 | 0.015 | 0.224 | -2.931 |
| Zfp811        | -0.324 | 6.649  | -2.941 | 0.015 | 0.224 | -2.931 |
| Gpr171        | 0.524  | 7.256  | 2.941  | 0.015 | 0.224 | -2.931 |
| Wipfl         | 0.632  | 8.945  | 2.941  | 0.015 | 0.224 | -2.932 |
| Cd19          | 0.497  | 6.690  | 2.940  | 0.015 | 0.225 | -2.933 |
| Nr2c2         | 0.296  | 9.686  | 2.939  | 0.015 | 0.225 | -2.934 |
| Gm10451       | 0.397  | 8.454  | 2.938  | 0.015 | 0.225 | -2.935 |
| Kif21b        | 0.805  | 9.693  | 2.937  | 0.015 | 0.225 | -2.937 |

|               |        |        |        |       |       |        |
|---------------|--------|--------|--------|-------|-------|--------|
| Slc2a4        | -1.135 | 7.966  | -2.937 | 0.015 | 0.225 | -2.938 |
| Palb2         | 0.415  | 7.760  | 2.935  | 0.015 | 0.226 | -2.941 |
| Mmp8          | 0.815  | 6.975  | 2.935  | 0.015 | 0.226 | -2.941 |
| AC079273.4    | 0.965  | 7.120  | 2.934  | 0.015 | 0.226 | -2.942 |
| Sema5a        | 0.641  | 9.007  | 2.933  | 0.015 | 0.226 | -2.944 |
| Ces1d         | -0.728 | 8.931  | -2.932 | 0.015 | 0.226 | -2.945 |
| Arl6          | -0.468 | 8.547  | -2.931 | 0.015 | 0.226 | -2.947 |
| Gm10231       | -0.235 | 8.742  | -2.931 | 0.015 | 0.226 | -2.948 |
| Tmem63a       | -0.802 | 11.877 | -2.930 | 0.015 | 0.226 | -2.949 |
| Dstyk         | -0.430 | 9.724  | -2.930 | 0.015 | 0.226 | -2.949 |
| Olr1          | 0.504  | 6.959  | 2.929  | 0.015 | 0.226 | -2.950 |
| Rxb           | -0.229 | 9.850  | -2.929 | 0.015 | 0.226 | -2.950 |
| Cdk2ap2       | -0.362 | 9.850  | -2.929 | 0.015 | 0.226 | -2.950 |
| Olfml1        | -0.235 | 7.453  | -2.928 | 0.015 | 0.226 | -2.952 |
| Topbp1        | 0.313  | 10.542 | 2.927  | 0.015 | 0.226 | -2.953 |
| Fam175a       | -0.274 | 8.676  | -2.927 | 0.015 | 0.226 | -2.953 |
| Syt12         | -1.578 | 12.884 | -2.927 | 0.015 | 0.226 | -2.954 |
| Sh3bgrl2      | -0.549 | 13.162 | -2.926 | 0.015 | 0.226 | -2.954 |
| 0610037P05Rik | -0.385 | 10.456 | -2.926 | 0.015 | 0.226 | -2.955 |
| Bri3          | -0.590 | 9.632  | -2.926 | 0.015 | 0.226 | -2.955 |
| Rhot1         | -0.495 | 10.616 | -2.926 | 0.015 | 0.226 | -2.956 |
| Lypd6b        | -2.185 | 10.221 | -2.926 | 0.015 | 0.226 | -2.956 |
| Trim16        | -0.492 | 10.569 | -2.926 | 0.015 | 0.226 | -2.956 |
| Rffl          | -0.532 | 10.444 | -2.922 | 0.015 | 0.227 | -2.961 |
| Lin7c         | 0.244  | 12.860 | 2.922  | 0.015 | 0.227 | -2.961 |
| Paqr7         | -0.961 | 9.670  | -2.922 | 0.015 | 0.227 | -2.961 |
| Pcp4          | -1.274 | 7.370  | -2.922 | 0.015 | 0.227 | -2.961 |
| Agpat4        | -1.713 | 10.677 | -2.922 | 0.015 | 0.227 | -2.962 |
| Fads2         | 0.967  | 10.073 | 2.921  | 0.015 | 0.227 | -2.963 |
| Naip1         | 2.249  | 10.695 | 2.919  | 0.015 | 0.227 | -2.965 |
| Fam132b       | 0.256  | 7.498  | 2.919  | 0.015 | 0.227 | -2.966 |
| Krt84         | 0.357  | 6.530  | 2.918  | 0.015 | 0.227 | -2.967 |
| Pygm          | -0.531 | 7.613  | -2.918 | 0.015 | 0.227 | -2.967 |
| RP24-69M8.3   | 0.256  | 6.575  | 2.918  | 0.015 | 0.227 | -2.968 |
| Uprt          | 0.264  | 9.020  | 2.918  | 0.015 | 0.227 | -2.968 |
| Slc35f5       | -0.431 | 12.084 | -2.917 | 0.015 | 0.227 | -2.969 |
| Cox8b         | -0.555 | 6.629  | -2.917 | 0.015 | 0.227 | -2.970 |
| Ier5          | 0.475  | 9.299  | 2.916  | 0.015 | 0.228 | -2.971 |
| Gm15848       | 0.395  | 7.164  | 2.915  | 0.015 | 0.228 | -2.972 |
| I17r          | 0.485  | 7.873  | 2.913  | 0.016 | 0.228 | -2.975 |
| Lamp2         | 0.345  | 13.115 | 2.913  | 0.016 | 0.228 | -2.976 |
| Cyt11         | -0.500 | 7.111  | -2.910 | 0.016 | 0.229 | -2.980 |
| Nr4a1         | 0.471  | 8.340  | 2.909  | 0.016 | 0.229 | -2.982 |
| Sash3         | 0.466  | 7.306  | 2.908  | 0.016 | 0.230 | -2.984 |
| Mapk1         | -0.239 | 12.015 | -2.907 | 0.016 | 0.230 | -2.986 |
| Rfc4          | 0.351  | 8.634  | 2.906  | 0.016 | 0.230 | -2.987 |
| Gfra1         | -0.764 | 7.375  | -2.905 | 0.016 | 0.230 | -2.988 |
| Pfkfb4        | 1.359  | 8.942  | 2.905  | 0.016 | 0.230 | -2.989 |
| Stx19         | -0.990 | 9.630  | -2.905 | 0.016 | 0.230 | -2.989 |
| N4bp1         | -0.501 | 10.909 | -2.904 | 0.016 | 0.230 | -2.989 |

|               |        |        |        |       |       |        |
|---------------|--------|--------|--------|-------|-------|--------|
| Ndrg2         | -0.915 | 10.121 | -2.904 | 0.016 | 0.230 | -2.990 |
| Pstk          | -0.322 | 8.764  | -2.903 | 0.016 | 0.230 | -2.991 |
| Klh122        | -0.514 | 10.265 | -2.903 | 0.016 | 0.230 | -2.992 |
| Rap1a         | -0.549 | 11.836 | -2.903 | 0.016 | 0.230 | -2.992 |
| Zbtb3         | -0.243 | 7.169  | -2.900 | 0.016 | 0.231 | -2.996 |
| Gm13024       | 0.227  | 6.465  | 2.900  | 0.016 | 0.231 | -2.996 |
| Tmed9         | -0.434 | 12.384 | -2.899 | 0.016 | 0.231 | -2.998 |
| Sft2d2        | 0.273  | 12.920 | 2.899  | 0.016 | 0.231 | -2.998 |
| Igsf6         | 0.481  | 7.696  | 2.899  | 0.016 | 0.231 | -2.998 |
| Psd           | -1.043 | 8.822  | -2.899 | 0.016 | 0.231 | -2.999 |
| Rbp4          | -0.496 | 7.902  | -2.898 | 0.016 | 0.231 | -3.000 |
| Anxa7         | -0.514 | 12.576 | -2.898 | 0.016 | 0.231 | -3.000 |
| AC159715.1    | 1.248  | 7.447  | 2.897  | 0.016 | 0.231 | -3.001 |
| Retnlg        | 0.816  | 7.788  | 2.896  | 0.016 | 0.231 | -3.002 |
| D930015M05Rik | -0.330 | 6.849  | -2.895 | 0.016 | 0.231 | -3.004 |
| Ms4a6c        | 0.615  | 8.257  | 2.895  | 0.016 | 0.231 | -3.005 |
| Sec63         | -0.212 | 12.350 | -2.895 | 0.016 | 0.231 | -3.005 |
| Gm17004       | 0.372  | 7.091  | 2.894  | 0.016 | 0.231 | -3.006 |
| Cdk14         | 0.394  | 6.713  | 2.893  | 0.016 | 0.231 | -3.007 |
| Synpo21       | -0.302 | 6.531  | -2.893 | 0.016 | 0.231 | -3.008 |
| Traf3         | 0.306  | 9.645  | 2.893  | 0.016 | 0.231 | -3.008 |
| 1500009L16Rik | 0.325  | 7.495  | 2.892  | 0.016 | 0.231 | -3.008 |
| Tbc1d1        | 0.393  | 10.324 | 2.892  | 0.016 | 0.231 | -3.009 |
| Tgfbr2        | 0.433  | 11.093 | 2.892  | 0.016 | 0.231 | -3.009 |
| Dnajc3        | -0.588 | 14.037 | -2.891 | 0.016 | 0.232 | -3.011 |
| Ip6k3         | -0.251 | 6.477  | -2.890 | 0.016 | 0.232 | -3.012 |
| Mypn          | -0.380 | 6.605  | -2.890 | 0.016 | 0.232 | -3.012 |
| Iscu          | -0.300 | 10.039 | -2.890 | 0.016 | 0.232 | -3.012 |
| Arhgap21      | 0.181  | 11.334 | 2.889  | 0.016 | 0.232 | -3.014 |
| Bdkrb1        | 0.408  | 7.304  | 2.889  | 0.016 | 0.232 | -3.014 |
| Znfx1         | 0.543  | 9.592  | 2.888  | 0.016 | 0.232 | -3.015 |
| Ksr1          | 0.949  | 9.114  | 2.888  | 0.016 | 0.232 | -3.015 |
| Barx1         | -1.614 | 8.354  | -2.887 | 0.016 | 0.232 | -3.017 |
| mt-Rnr1       | -0.608 | 13.750 | -2.886 | 0.016 | 0.232 | -3.019 |
| 2210020M01Rik | -0.466 | 7.473  | -2.886 | 0.016 | 0.232 | -3.019 |
| Dcbld2        | -0.867 | 9.701  | -2.885 | 0.016 | 0.232 | -3.020 |
| Map4k4        | 0.395  | 11.591 | 2.885  | 0.016 | 0.232 | -3.020 |
| 2-Mar         | -0.428 | 9.737  | -2.885 | 0.016 | 0.232 | -3.021 |
| Rgs14         | 0.364  | 7.032  | 2.884  | 0.016 | 0.232 | -3.021 |
| Gm12845       | -0.484 | 6.706  | -2.883 | 0.016 | 0.232 | -3.023 |
| Tmem220       | -0.498 | 9.331  | -2.883 | 0.016 | 0.232 | -3.023 |
| Muc5ac        | -4.206 | 14.459 | -2.883 | 0.016 | 0.232 | -3.024 |
| Gm3940        | -0.296 | 6.674  | -2.883 | 0.016 | 0.232 | -3.024 |
| Gm20541       | -0.208 | 6.648  | -2.882 | 0.016 | 0.232 | -3.025 |
| Tmprss3       | -0.485 | 7.579  | -2.882 | 0.016 | 0.232 | -3.025 |
| Klh121        | -0.426 | 10.054 | -2.882 | 0.016 | 0.232 | -3.026 |
| Eno1          | 0.285  | 12.396 | 2.881  | 0.016 | 0.232 | -3.027 |
| 2010012P19Rik | 0.767  | 7.979  | 2.881  | 0.016 | 0.232 | -3.027 |
| Nudt6         | -0.256 | 7.724  | -2.881 | 0.016 | 0.232 | -3.027 |
| Trim14        | 0.406  | 8.014  | 2.881  | 0.016 | 0.232 | -3.027 |

|               |        |        |        |       |       |        |
|---------------|--------|--------|--------|-------|-------|--------|
| Clip1         | -0.755 | 11.670 | -2.879 | 0.016 | 0.232 | -3.029 |
| Arsi          | 0.497  | 7.218  | 2.879  | 0.016 | 0.232 | -3.030 |
| Gm8420        | 0.234  | 7.573  | 2.878  | 0.016 | 0.233 | -3.032 |
| Gm15560       | 0.259  | 6.481  | 2.877  | 0.016 | 0.233 | -3.032 |
| Helz          | 0.252  | 10.190 | 2.877  | 0.016 | 0.233 | -3.032 |
| Gm15915       | -1.145 | 7.224  | -2.876 | 0.017 | 0.233 | -3.034 |
| Tle3          | -0.608 | 11.018 | -2.876 | 0.017 | 0.233 | -3.034 |
| AC122511.1    | -0.666 | 8.209  | -2.875 | 0.017 | 0.233 | -3.036 |
| Cyth3         | -0.587 | 10.116 | -2.874 | 0.017 | 0.233 | -3.039 |
| Dusp8         | 0.575  | 8.086  | 2.873  | 0.017 | 0.233 | -3.039 |
| Pcdhb5        | 0.773  | 7.455  | 2.873  | 0.017 | 0.233 | -3.040 |
| Emp2          | -1.090 | 9.554  | -2.872 | 0.017 | 0.233 | -3.040 |
| Calb2         | 0.411  | 7.204  | 2.872  | 0.017 | 0.233 | -3.041 |
| Obfc2a        | 0.459  | 9.772  | 2.872  | 0.017 | 0.233 | -3.041 |
| Jag1          | -0.493 | 10.047 | -2.871 | 0.017 | 0.233 | -3.042 |
| Gm9978        | -0.213 | 7.329  | -2.871 | 0.017 | 0.233 | -3.042 |
| Sostdc1       | -0.403 | 6.732  | -2.870 | 0.017 | 0.234 | -3.045 |
| Mustn1        | -0.671 | 9.273  | -2.870 | 0.017 | 0.234 | -3.045 |
| Ttc39c        | 0.722  | 7.749  | 2.870  | 0.017 | 0.234 | -3.045 |
| Zfp51         | -0.230 | 9.246  | -2.869 | 0.017 | 0.234 | -3.046 |
| I113          | 0.374  | 6.539  | 2.868  | 0.017 | 0.234 | -3.047 |
| Art3          | -0.910 | 8.004  | -2.868 | 0.017 | 0.234 | -3.048 |
| Htr7          | 0.482  | 6.820  | 2.867  | 0.017 | 0.234 | -3.049 |
| Gda           | 2.108  | 11.619 | 2.867  | 0.017 | 0.234 | -3.049 |
| Dnajc13       | 0.365  | 11.324 | 2.866  | 0.017 | 0.234 | -3.050 |
| Atxn1         | 0.321  | 9.812  | 2.866  | 0.017 | 0.234 | -3.050 |
| Ccdc154       | -0.564 | 7.288  | -2.866 | 0.017 | 0.234 | -3.051 |
| Pla2g10       | -1.593 | 10.093 | -2.865 | 0.017 | 0.234 | -3.052 |
| Lbh           | -0.834 | 11.698 | -2.864 | 0.017 | 0.234 | -3.054 |
| Rhpn1         | -0.323 | 6.513  | -2.863 | 0.017 | 0.234 | -3.055 |
| Smtn          | -0.899 | 10.103 | -2.863 | 0.017 | 0.234 | -3.055 |
| 5730508B09Rik | -0.801 | 9.862  | -2.863 | 0.017 | 0.234 | -3.056 |
| Gm8292        | -0.467 | 7.151  | -2.863 | 0.017 | 0.234 | -3.056 |
| Hapln3        | 0.342  | 6.796  | 2.862  | 0.017 | 0.234 | -3.056 |
| Nacad         | -0.416 | 7.179  | -2.862 | 0.017 | 0.234 | -3.057 |
| Bst1          | 1.087  | 7.460  | 2.861  | 0.017 | 0.234 | -3.058 |
| Cyp17a1       | -0.281 | 6.492  | -2.861 | 0.017 | 0.234 | -3.058 |
| Smox          | 0.805  | 9.332  | 2.861  | 0.017 | 0.234 | -3.059 |
| Dnalc4        | -0.253 | 8.551  | -2.861 | 0.017 | 0.234 | -3.059 |
| Tbx20         | 0.254  | 6.638  | 2.861  | 0.017 | 0.234 | -3.059 |
| Slc4a11       | 0.770  | 7.217  | 2.860  | 0.017 | 0.234 | -3.060 |
| Gm14303       | -0.397 | 10.742 | -2.860 | 0.017 | 0.234 | -3.060 |
| Dck           | 0.320  | 9.469  | 2.860  | 0.017 | 0.234 | -3.060 |
| Pcsk9         | 0.497  | 7.113  | 2.859  | 0.017 | 0.234 | -3.061 |
| Aldh6a1       | -0.762 | 10.923 | -2.856 | 0.017 | 0.235 | -3.066 |
| Gna15         | 0.256  | 6.955  | 2.856  | 0.017 | 0.235 | -3.067 |
| Rasgrf1       | 0.431  | 7.004  | 2.855  | 0.017 | 0.235 | -3.067 |
| 1700020I14Rik | 0.213  | 12.629 | 2.855  | 0.017 | 0.235 | -3.068 |
| Tsta3         | -0.291 | 11.556 | -2.855 | 0.017 | 0.235 | -3.068 |
| Gls           | 0.761  | 11.680 | 2.855  | 0.017 | 0.235 | -3.068 |



|               |        |        |        |       |       |        |
|---------------|--------|--------|--------|-------|-------|--------|
| Tst           | -1.750 | 10.582 | -2.854 | 0.017 | 0.235 | -3.069 |
| Pgf           | 0.495  | 7.263  | 2.852  | 0.017 | 0.235 | -3.072 |
| Mapk8ip1      | -0.345 | 7.724  | -2.852 | 0.017 | 0.235 | -3.072 |
| Bahd1         | -0.305 | 9.335  | -2.852 | 0.017 | 0.235 | -3.073 |
| Cbr1          | -1.047 | 12.166 | -2.851 | 0.017 | 0.235 | -3.075 |
| Slurp1        | -1.359 | 8.079  | -2.851 | 0.017 | 0.235 | -3.075 |
| AC214054.1    | -0.331 | 6.574  | -2.850 | 0.017 | 0.235 | -3.076 |
| Cebpb         | 0.342  | 8.838  | 2.849  | 0.017 | 0.235 | -3.077 |
| Ppp1r35       | -0.253 | 8.226  | -2.849 | 0.017 | 0.235 | -3.078 |
| Aldh3b2       | -1.008 | 7.910  | -2.848 | 0.017 | 0.235 | -3.079 |
| Ccdc18        | 0.329  | 7.834  | 2.848  | 0.017 | 0.235 | -3.079 |
| Zfyve26       | 0.289  | 8.784  | 2.848  | 0.017 | 0.235 | -3.079 |
| Coro2b        | -0.694 | 8.287  | -2.847 | 0.017 | 0.235 | -3.081 |
| Krt79         | -1.225 | 8.633  | -2.847 | 0.017 | 0.235 | -3.081 |
| Snx7          | 0.742  | 11.333 | 2.847  | 0.017 | 0.235 | -3.081 |
| Lgals3        | 1.312  | 13.052 | 2.846  | 0.017 | 0.235 | -3.083 |
| Adamts4       | 0.817  | 8.193  | 2.845  | 0.017 | 0.235 | -3.083 |
| Meis1         | -0.497 | 9.650  | -2.845 | 0.017 | 0.235 | -3.083 |
| Mier3         | -0.418 | 10.557 | -2.845 | 0.017 | 0.235 | -3.084 |
| Mettl7a1      | -1.237 | 11.287 | -2.844 | 0.017 | 0.235 | -3.085 |
| Hmgxb4        | 0.334  | 9.696  | 2.844  | 0.017 | 0.235 | -3.086 |
| Ppbp          | 0.536  | 6.740  | 2.844  | 0.017 | 0.235 | -3.086 |
| AC153928.1    | 1.142  | 7.150  | 2.844  | 0.017 | 0.235 | -3.086 |
| Srsf5         | 0.320  | 13.978 | 2.843  | 0.017 | 0.235 | -3.087 |
| Sntb1         | -0.627 | 8.190  | -2.843 | 0.018 | 0.235 | -3.088 |
| Gm6531        | -0.217 | 6.460  | -2.842 | 0.018 | 0.235 | -3.089 |
| Evi2a         | 0.453  | 7.560  | 2.842  | 0.018 | 0.235 | -3.089 |
| Ssr2          | -0.272 | 12.086 | -2.842 | 0.018 | 0.235 | -3.090 |
| Rpl38         | -0.320 | 11.678 | -2.842 | 0.018 | 0.235 | -3.090 |
| Rps21         | -0.324 | 11.780 | -2.841 | 0.018 | 0.235 | -3.090 |
| Apoc1         | -0.325 | 6.638  | -2.841 | 0.018 | 0.235 | -3.090 |
| Ift57         | -0.415 | 8.147  | -2.841 | 0.018 | 0.235 | -3.091 |
| 6330503K22Rik | 0.232  | 8.805  | 2.841  | 0.018 | 0.235 | -3.091 |
| Tsc22d2       | -0.322 | 9.988  | -2.840 | 0.018 | 0.235 | -3.091 |
| Pepd          | 0.606  | 10.961 | 2.840  | 0.018 | 0.235 | -3.092 |
| Rasa2         | 0.224  | 10.986 | 2.840  | 0.018 | 0.235 | -3.092 |
| Voppl         | -0.983 | 11.510 | -2.840 | 0.018 | 0.235 | -3.092 |
| Kit1          | -0.388 | 11.659 | -2.840 | 0.018 | 0.235 | -3.093 |
| AA413626      | 0.296  | 6.641  | 2.837  | 0.018 | 0.236 | -3.096 |
| BC051070      | -0.220 | 6.461  | -2.837 | 0.018 | 0.236 | -3.097 |
| H2-DMb2       | 0.487  | 7.117  | 2.837  | 0.018 | 0.236 | -3.097 |
| Jun           | 0.510  | 10.775 | 2.837  | 0.018 | 0.236 | -3.097 |
| Sox8          | -0.289 | 6.496  | -2.837 | 0.018 | 0.236 | -3.097 |
| Ccl8          | 0.356  | 7.426  | 2.836  | 0.018 | 0.236 | -3.098 |
| Stat3         | 0.225  | 11.946 | 2.836  | 0.018 | 0.236 | -3.099 |
| Ciapin1       | 0.415  | 9.886  | 2.835  | 0.018 | 0.236 | -3.100 |
| Mpv1712       | -0.378 | 9.104  | -2.835 | 0.018 | 0.236 | -3.100 |
| Gm15676       | 0.318  | 6.746  | 2.834  | 0.018 | 0.236 | -3.101 |
| Fhl1          | -1.463 | 12.938 | -2.834 | 0.018 | 0.236 | -3.101 |
| Hsbp1         | -0.253 | 11.439 | -2.834 | 0.018 | 0.236 | -3.102 |

|            |        |        |        |       |       |        |
|------------|--------|--------|--------|-------|-------|--------|
| Dip2b      | -0.227 | 10.510 | -2.833 | 0.018 | 0.236 | -3.103 |
| Pex7       | -0.248 | 9.793  | -2.833 | 0.018 | 0.236 | -3.104 |
| Aifm3      | -0.357 | 7.223  | -2.832 | 0.018 | 0.236 | -3.104 |
| Rpl26      | -0.335 | 12.291 | -2.831 | 0.018 | 0.236 | -3.106 |
| A2m        | 2.126  | 8.067  | 2.831  | 0.018 | 0.236 | -3.106 |
| Inpp11     | -0.393 | 11.086 | -2.831 | 0.018 | 0.236 | -3.106 |
| Mrgprb1    | -0.326 | 6.657  | -2.831 | 0.018 | 0.236 | -3.106 |
| Tmem202    | -0.371 | 7.144  | -2.831 | 0.018 | 0.236 | -3.107 |
| Pygb       | -0.805 | 12.152 | -2.830 | 0.018 | 0.236 | -3.107 |
| Lrrk2      | 0.667  | 8.645  | 2.830  | 0.018 | 0.236 | -3.108 |
| Fancc      | 0.369  | 8.381  | 2.828  | 0.018 | 0.237 | -3.111 |
| AC159308.1 | 1.126  | 8.203  | 2.828  | 0.018 | 0.237 | -3.112 |
| Cd3d       | 0.400  | 7.080  | 2.827  | 0.018 | 0.237 | -3.113 |
| Col6a5     | 0.643  | 9.820  | 2.826  | 0.018 | 0.237 | -3.115 |
| Rps29      | -0.439 | 11.452 | -2.825 | 0.018 | 0.237 | -3.116 |
| Gm12928    | 0.312  | 6.656  | 2.823  | 0.018 | 0.238 | -3.119 |
| Gm9938     | 0.299  | 8.356  | 2.823  | 0.018 | 0.238 | -3.119 |
| Mrpl14     | -0.550 | 9.287  | -2.823 | 0.018 | 0.238 | -3.120 |
| Tnfrsf21   | -1.079 | 12.438 | -2.822 | 0.018 | 0.238 | -3.120 |
| Etnk1      | -0.285 | 13.315 | -2.822 | 0.018 | 0.238 | -3.121 |
| Tmc7       | -0.451 | 10.234 | -2.822 | 0.018 | 0.238 | -3.121 |
| Lmbr11     | 0.380  | 8.687  | 2.820  | 0.018 | 0.238 | -3.123 |
| Fkbp1      | -0.212 | 8.371  | -2.820 | 0.018 | 0.238 | -3.124 |
| Meox1      | 0.792  | 8.149  | 2.819  | 0.018 | 0.238 | -3.125 |
| Rpl37a     | -0.353 | 11.900 | -2.819 | 0.018 | 0.238 | -3.126 |
| Sh3yl1     | -0.403 | 10.822 | -2.819 | 0.018 | 0.238 | -3.126 |
| I14i1      | 0.426  | 7.316  | 2.818  | 0.018 | 0.238 | -3.127 |
| Ppapdc3    | -0.285 | 6.990  | -2.818 | 0.018 | 0.238 | -3.127 |
| Pecam1     | 0.711  | 10.356 | 2.817  | 0.018 | 0.238 | -3.128 |
| Htr2a      | 0.424  | 6.772  | 2.817  | 0.018 | 0.238 | -3.128 |
| Fam45a     | -0.367 | 10.216 | -2.817 | 0.018 | 0.238 | -3.129 |
| Gprasp2    | -0.488 | 7.139  | -2.817 | 0.018 | 0.238 | -3.129 |
| Afm        | -0.625 | 7.134  | -2.817 | 0.018 | 0.238 | -3.129 |
| Gm13388    | 0.225  | 6.464  | 2.816  | 0.018 | 0.238 | -3.130 |
| Bad        | -0.246 | 10.089 | -2.815 | 0.018 | 0.239 | -3.132 |
| Rhobtb2    | 0.860  | 9.491  | 2.813  | 0.018 | 0.239 | -3.135 |
| Gin1       | 0.264  | 8.572  | 2.812  | 0.018 | 0.240 | -3.137 |
| Gm16344    | 0.368  | 7.376  | 2.812  | 0.018 | 0.240 | -3.137 |
| Pdpf       | -0.394 | 9.976  | -2.811 | 0.018 | 0.240 | -3.138 |
| Neur13     | 1.014  | 11.372 | 2.811  | 0.018 | 0.240 | -3.138 |
| Dok3       | 0.328  | 7.205  | 2.810  | 0.019 | 0.240 | -3.139 |
| Casp8      | 0.603  | 11.415 | 2.809  | 0.019 | 0.240 | -3.141 |
| Zdbf2      | -0.243 | 6.473  | -2.809 | 0.019 | 0.240 | -3.142 |
| Akap13     | 0.267  | 11.556 | 2.809  | 0.019 | 0.240 | -3.142 |
| Bmpr1a     | -0.324 | 12.350 | -2.808 | 0.019 | 0.240 | -3.143 |
| Gabarap    | -0.316 | 12.839 | -2.808 | 0.019 | 0.240 | -3.143 |
| Sftpd      | 1.341  | 8.937  | 2.807  | 0.019 | 0.240 | -3.144 |
| Rin3       | 0.293  | 7.505  | 2.807  | 0.019 | 0.240 | -3.145 |
| Pygo2      | -0.294 | 9.995  | -2.807 | 0.019 | 0.240 | -3.145 |
| Lass2      | 0.247  | 11.718 | 2.806  | 0.019 | 0.240 | -3.146 |

|               |        |        |        |       |       |        |
|---------------|--------|--------|--------|-------|-------|--------|
| Tspan12       | 1.297  | 11.178 | 2.806  | 0.019 | 0.240 | -3.146 |
| Ero11b        | -0.758 | 10.388 | -2.806 | 0.019 | 0.240 | -3.146 |
| Clec11a       | 0.354  | 7.507  | 2.805  | 0.019 | 0.240 | -3.148 |
| Sepx1         | -0.434 | 10.643 | -2.805 | 0.019 | 0.240 | -3.148 |
| St8sia5       | -0.191 | 6.447  | -2.805 | 0.019 | 0.240 | -3.148 |
| Pcdhb2        | 0.302  | 6.806  | 2.804  | 0.019 | 0.240 | -3.149 |
| Uqcrb         | -0.515 | 12.534 | -2.804 | 0.019 | 0.240 | -3.149 |
| Bnip3         | -0.546 | 9.625  | -2.803 | 0.019 | 0.240 | -3.151 |
| Acot13        | -0.435 | 9.826  | -2.803 | 0.019 | 0.240 | -3.151 |
| F10           | 0.521  | 7.195  | 2.803  | 0.019 | 0.240 | -3.151 |
| 2810030E01Rik | -0.550 | 7.907  | -2.803 | 0.019 | 0.240 | -3.151 |
| Clip2         | 0.225  | 10.526 | 2.802  | 0.019 | 0.240 | -3.152 |
| Lrrc4c        | -0.526 | 7.231  | -2.802 | 0.019 | 0.240 | -3.153 |
| Mmd2          | -0.308 | 6.539  | -2.802 | 0.019 | 0.240 | -3.153 |
| Mtch1         | -0.564 | 12.172 | -2.801 | 0.019 | 0.240 | -3.153 |
| 4931406C07Rik | 0.957  | 12.171 | 2.801  | 0.019 | 0.240 | -3.154 |
| Tpcn1         | -0.489 | 10.236 | -2.801 | 0.019 | 0.240 | -3.154 |
| Prss8         | -0.487 | 10.753 | -2.800 | 0.019 | 0.240 | -3.155 |
| Iglv1         | 2.306  | 8.814  | 2.800  | 0.019 | 0.240 | -3.155 |
| Sema4c        | 0.310  | 8.401  | 2.800  | 0.019 | 0.240 | -3.156 |
| Sass6         | 0.290  | 8.481  | 2.799  | 0.019 | 0.240 | -3.157 |
| Gm13370       | -0.310 | 6.626  | -2.799 | 0.019 | 0.240 | -3.157 |
| Ak3           | -0.482 | 13.338 | -2.798 | 0.019 | 0.240 | -3.158 |
| Amical        | 1.199  | 8.733  | 2.797  | 0.019 | 0.241 | -3.161 |
| Irf2bp2       | -0.306 | 11.464 | -2.797 | 0.019 | 0.241 | -3.161 |
| Tmem116       | 0.412  | 8.056  | 2.796  | 0.019 | 0.241 | -3.162 |
| Ccdc68        | -0.331 | 10.172 | -2.795 | 0.019 | 0.241 | -3.164 |
| 5730590G19Rik | 0.413  | 7.832  | 2.793  | 0.019 | 0.241 | -3.166 |
| Tpt1          | -0.239 | 15.362 | -2.793 | 0.019 | 0.241 | -3.167 |
| Lin28a        | 0.355  | 6.583  | 2.793  | 0.019 | 0.241 | -3.167 |
| Gm15283       | 0.596  | 6.966  | 2.793  | 0.019 | 0.241 | -3.167 |
| Gm11826       | 0.210  | 6.517  | 2.793  | 0.019 | 0.241 | -3.167 |
| Dna2          | 0.496  | 8.317  | 2.793  | 0.019 | 0.241 | -3.167 |
| Slc30a1       | 0.538  | 9.841  | 2.793  | 0.019 | 0.241 | -3.168 |
| AC103359.1    | 0.295  | 6.652  | 2.791  | 0.019 | 0.241 | -3.169 |
| Myl6          | -0.556 | 13.815 | -2.791 | 0.019 | 0.241 | -3.170 |
| Hsd17b7       | 0.557  | 10.300 | 2.791  | 0.019 | 0.241 | -3.170 |
| Pdzd9         | -0.299 | 6.922  | -2.790 | 0.019 | 0.241 | -3.171 |
| Gm14292       | 0.321  | 8.466  | 2.790  | 0.019 | 0.241 | -3.172 |
| N28178        | -0.366 | 7.117  | -2.789 | 0.019 | 0.241 | -3.172 |
| Ear11         | -0.559 | 6.739  | -2.789 | 0.019 | 0.241 | -3.173 |
| Mrps30        | -0.239 | 9.315  | -2.788 | 0.019 | 0.242 | -3.174 |
| Ncl           | 0.365  | 14.626 | 2.788  | 0.019 | 0.242 | -3.175 |
| Dpp6          | -0.545 | 6.924  | -2.787 | 0.019 | 0.242 | -3.176 |
| Ldhb          | -0.930 | 9.831  | -2.787 | 0.019 | 0.242 | -3.177 |
| Lrrc48        | 0.367  | 7.250  | 2.787  | 0.019 | 0.242 | -3.177 |
| Prex1         | 0.633  | 9.680  | 2.786  | 0.019 | 0.242 | -3.177 |
| 1810019J16Rik | -0.247 | 8.029  | -2.785 | 0.019 | 0.242 | -3.179 |
| Mpp2          | -0.410 | 7.549  | -2.785 | 0.019 | 0.242 | -3.179 |
| B4galt1       | 0.221  | 12.116 | 2.785  | 0.019 | 0.242 | -3.180 |

|               |        |        |        |       |       |        |
|---------------|--------|--------|--------|-------|-------|--------|
| Sash1         | 0.595  | 10.398 | 2.785  | 0.019 | 0.242 | -3.180 |
| Tmem132a      | 0.313  | 7.639  | 2.784  | 0.019 | 0.242 | -3.182 |
| Ces1c         | 0.601  | 6.852  | 2.784  | 0.019 | 0.242 | -3.182 |
| Rfc1          | 0.225  | 10.740 | 2.783  | 0.019 | 0.242 | -3.182 |
| Klrk1         | 0.393  | 7.025  | 2.783  | 0.019 | 0.242 | -3.183 |
| Gm20539       | -0.366 | 6.890  | -2.783 | 0.019 | 0.242 | -3.183 |
| Rab27a        | -1.270 | 12.945 | -2.783 | 0.019 | 0.242 | -3.183 |
| Rasgrp1       | -0.676 | 9.354  | -2.782 | 0.019 | 0.242 | -3.185 |
| Gm15232       | 0.292  | 6.590  | 2.781  | 0.019 | 0.242 | -3.185 |
| Abhd1         | 0.644  | 7.164  | 2.780  | 0.019 | 0.243 | -3.187 |
| Raplgap2      | -0.435 | 10.776 | -2.778 | 0.020 | 0.243 | -3.190 |
| Cyp39a1       | -0.248 | 9.521  | -2.778 | 0.020 | 0.243 | -3.191 |
| Gm15657       | 0.538  | 6.708  | 2.777  | 0.020 | 0.243 | -3.192 |
| Zfp187        | -0.323 | 10.503 | -2.777 | 0.020 | 0.244 | -3.193 |
| Relt          | 0.532  | 6.869  | 2.776  | 0.020 | 0.244 | -3.194 |
| D17H6S53E     | -0.388 | 10.071 | -2.776 | 0.020 | 0.244 | -3.194 |
| Tgfbr3        | -0.606 | 9.422  | -2.775 | 0.020 | 0.244 | -3.195 |
| Bik           | -0.276 | 7.267  | -2.775 | 0.020 | 0.244 | -3.196 |
| Kcna5         | -0.438 | 6.819  | -2.774 | 0.020 | 0.244 | -3.197 |
| Fbxo10        | -0.304 | 7.786  | -2.774 | 0.020 | 0.244 | -3.197 |
| Tt117         | -1.034 | 10.592 | -2.774 | 0.020 | 0.244 | -3.198 |
| Gm12141       | 0.442  | 10.201 | 2.773  | 0.020 | 0.244 | -3.199 |
| At12          | 0.552  | 11.758 | 2.772  | 0.020 | 0.244 | -3.201 |
| Galnt2        | -0.263 | 7.401  | -2.771 | 0.020 | 0.244 | -3.201 |
| Cybrd1        | 2.062  | 13.648 | 2.771  | 0.020 | 0.244 | -3.202 |
| Heph          | 2.891  | 10.464 | 2.771  | 0.020 | 0.244 | -3.202 |
| Uhrf1         | 0.565  | 9.474  | 2.770  | 0.020 | 0.244 | -3.203 |
| Tigit         | 0.399  | 7.387  | 2.770  | 0.020 | 0.244 | -3.203 |
| Elov14        | -0.478 | 7.132  | -2.770 | 0.020 | 0.244 | -3.204 |
| Mgst3         | -1.098 | 12.637 | -2.770 | 0.020 | 0.244 | -3.204 |
| Tpm2          | -1.665 | 12.173 | -2.769 | 0.020 | 0.244 | -3.206 |
| Acap1         | 0.593  | 7.506  | 2.769  | 0.020 | 0.244 | -3.206 |
| Ccn12         | -0.232 | 11.958 | -2.768 | 0.020 | 0.244 | -3.206 |
| Cxcl2         | 1.321  | 7.399  | 2.768  | 0.020 | 0.244 | -3.207 |
| Gm18367       | -0.231 | 6.508  | -2.767 | 0.020 | 0.244 | -3.208 |
| Fam174b       | -0.945 | 11.241 | -2.767 | 0.020 | 0.245 | -3.208 |
| Gm10639       | -1.820 | 11.218 | -2.766 | 0.020 | 0.245 | -3.210 |
| Sorbs3        | -0.729 | 9.632  | -2.766 | 0.020 | 0.245 | -3.210 |
| Gm14391       | 0.281  | 8.640  | 2.765  | 0.020 | 0.245 | -3.211 |
| Zc3h12b       | 0.242  | 7.308  | 2.764  | 0.020 | 0.245 | -3.213 |
| Tle2          | -0.425 | 8.145  | -2.764 | 0.020 | 0.245 | -3.213 |
| Mogat2        | 1.713  | 9.298  | 2.763  | 0.020 | 0.245 | -3.214 |
| Vcam1         | 0.682  | 9.195  | 2.763  | 0.020 | 0.245 | -3.214 |
| Sp140         | 0.437  | 7.719  | 2.763  | 0.020 | 0.245 | -3.214 |
| Aldh3a1       | -2.796 | 10.064 | -2.763 | 0.020 | 0.245 | -3.215 |
| Dok1          | -0.328 | 8.292  | -2.763 | 0.020 | 0.245 | -3.215 |
| Gm11545       | 1.393  | 8.837  | 2.762  | 0.020 | 0.245 | -3.215 |
| 2310030G06Rik | -0.290 | 9.616  | -2.762 | 0.020 | 0.245 | -3.216 |
| Prr24         | -0.444 | 9.747  | -2.762 | 0.020 | 0.245 | -3.216 |
| Sdr42e1       | -0.558 | 9.469  | -2.761 | 0.020 | 0.245 | -3.218 |

|               |        |        |        |       |       |        |
|---------------|--------|--------|--------|-------|-------|--------|
| Itga2         | 0.935  | 9.870  | 2.760  | 0.020 | 0.245 | -3.219 |
| Ssbp3         | -0.450 | 10.403 | -2.760 | 0.020 | 0.245 | -3.219 |
| Cd244         | 0.748  | 7.472  | 2.760  | 0.020 | 0.245 | -3.220 |
| Tmbim4        | -0.309 | 10.743 | -2.760 | 0.020 | 0.245 | -3.220 |
| Agtr1b        | -0.446 | 7.078  | -2.759 | 0.020 | 0.245 | -3.221 |
| Klh18         | -0.455 | 7.873  | -2.759 | 0.020 | 0.245 | -3.221 |
| Gfap          | -0.640 | 7.019  | -2.758 | 0.020 | 0.245 | -3.222 |
| Adamdec1      | 1.090  | 11.095 | 2.758  | 0.020 | 0.245 | -3.223 |
| Xlr3a         | -0.904 | 8.138  | -2.758 | 0.020 | 0.245 | -3.223 |
| BC039771      | 0.282  | 6.961  | 2.757  | 0.020 | 0.245 | -3.225 |
| Smagp         | -0.429 | 10.803 | -2.757 | 0.020 | 0.245 | -3.225 |
| Nuak2         | 1.060  | 8.428  | 2.756  | 0.020 | 0.245 | -3.225 |
| RNase         | -0.596 | 6.716  | -2.756 | 0.020 | 0.245 | -3.225 |
| Daam1         | -0.353 | 11.311 | -2.756 | 0.020 | 0.245 | -3.225 |
| Dnajb2        | -0.387 | 9.347  | -2.756 | 0.020 | 0.245 | -3.226 |
| Sctr          | -1.353 | 8.192  | -2.756 | 0.020 | 0.245 | -3.226 |
| Chrnbl        | 0.279  | 7.949  | 2.755  | 0.020 | 0.245 | -3.227 |
| Arid5a        | 0.716  | 8.088  | 2.755  | 0.020 | 0.245 | -3.227 |
| Zfp945        | 0.290  | 8.914  | 2.755  | 0.020 | 0.245 | -3.228 |
| Ccdc149       | -0.500 | 9.501  | -2.755 | 0.020 | 0.245 | -3.228 |
| Cept1         | -0.341 | 11.711 | -2.754 | 0.020 | 0.245 | -3.229 |
| Irg1          | 0.681  | 6.847  | 2.754  | 0.020 | 0.245 | -3.229 |
| Gm6768        | 1.601  | 10.673 | 2.753  | 0.020 | 0.245 | -3.230 |
| 4632434I11Rik | 0.280  | 8.091  | 2.752  | 0.020 | 0.245 | -3.231 |
| Srcin1        | -0.409 | 6.760  | -2.752 | 0.020 | 0.245 | -3.232 |
| Rab11a        | -0.434 | 12.078 | -2.751 | 0.020 | 0.246 | -3.234 |
| Atg13         | -0.321 | 10.326 | -2.751 | 0.020 | 0.246 | -3.234 |
| Gm6088        | 0.205  | 6.500  | 2.751  | 0.020 | 0.246 | -3.234 |
| Rassf3        | -0.424 | 11.814 | -2.750 | 0.021 | 0.246 | -3.235 |
| Rltpr         | 0.376  | 6.918  | 2.750  | 0.021 | 0.246 | -3.236 |
| Ly6g6e        | -1.094 | 9.715  | -2.750 | 0.021 | 0.246 | -3.236 |
| Cdkn1c        | -0.933 | 8.694  | -2.749 | 0.021 | 0.246 | -3.236 |
| Atp5e         | -0.396 | 11.026 | -2.749 | 0.021 | 0.246 | -3.236 |
| Ywhab         | -0.460 | 12.897 | -2.749 | 0.021 | 0.246 | -3.238 |
| Grb7          | 0.307  | 10.502 | 2.749  | 0.021 | 0.246 | -3.238 |
| Car2          | -0.923 | 15.016 | -2.748 | 0.021 | 0.246 | -3.238 |
| Zbtb5         | 0.292  | 8.478  | 2.748  | 0.021 | 0.246 | -3.238 |
| Abhd12        | -0.629 | 10.509 | -2.748 | 0.021 | 0.246 | -3.239 |
| Nomol         | 0.393  | 10.997 | 2.747  | 0.021 | 0.246 | -3.240 |
| Crip1         | 1.027  | 11.693 | 2.747  | 0.021 | 0.246 | -3.240 |
| Ndst1         | 0.297  | 11.022 | 2.746  | 0.021 | 0.246 | -3.241 |
| Tprgl         | -0.521 | 10.945 | -2.746 | 0.021 | 0.246 | -3.242 |
| C3ar1         | 0.396  | 8.072  | 2.742  | 0.021 | 0.247 | -3.248 |
| Cyp2t4        | 0.292  | 6.651  | 2.742  | 0.021 | 0.247 | -3.248 |
| Ugp2          | -0.464 | 12.521 | -2.741 | 0.021 | 0.247 | -3.249 |
| Ndufv3        | -0.394 | 10.647 | -2.741 | 0.021 | 0.247 | -3.249 |
| Ddx6          | -0.340 | 13.611 | -2.741 | 0.021 | 0.247 | -3.250 |
| Mfsd5         | -0.387 | 9.302  | -2.740 | 0.021 | 0.247 | -3.251 |
| Echdc3        | -0.302 | 7.929  | -2.738 | 0.021 | 0.248 | -3.254 |
| I113ra2       | 0.847  | 7.325  | 2.738  | 0.021 | 0.248 | -3.254 |

|               |        |        |        |       |       |        |
|---------------|--------|--------|--------|-------|-------|--------|
| Hkdc1         | 2.609  | 9.748  | 2.738  | 0.021 | 0.248 | -3.255 |
| Fhod3         | -0.306 | 7.094  | -2.737 | 0.021 | 0.248 | -3.256 |
| Sstr2         | -0.665 | 7.469  | -2.737 | 0.021 | 0.248 | -3.256 |
| Akrlb3        | -0.764 | 10.228 | -2.737 | 0.021 | 0.248 | -3.257 |
| Vstm2b        | -2.332 | 10.102 | -2.737 | 0.021 | 0.248 | -3.257 |
| Scml2         | -0.395 | 7.403  | -2.736 | 0.021 | 0.248 | -3.257 |
| Brpf1         | 0.204  | 9.922  | 2.735  | 0.021 | 0.248 | -3.259 |
| CAA01083517.2 | -0.263 | 8.917  | -2.734 | 0.021 | 0.249 | -3.261 |
| Adcy2         | -0.823 | 9.235  | -2.734 | 0.021 | 0.249 | -3.261 |
| Ankrd35       | -1.269 | 9.476  | -2.733 | 0.021 | 0.249 | -3.262 |
| AI427809      | 0.843  | 7.115  | 2.733  | 0.021 | 0.249 | -3.263 |
| Tubd1         | -0.345 | 8.612  | -2.732 | 0.021 | 0.249 | -3.264 |
| Card14        | 0.517  | 7.584  | 2.732  | 0.021 | 0.249 | -3.265 |
| Krtdap        | -0.238 | 6.470  | -2.731 | 0.021 | 0.249 | -3.266 |
| Rad52         | -0.210 | 8.302  | -2.731 | 0.021 | 0.249 | -3.266 |
| Sell1         | -0.554 | 12.839 | -2.730 | 0.021 | 0.249 | -3.266 |
| Ptrh1         | 0.473  | 8.404  | 2.730  | 0.021 | 0.249 | -3.267 |
| Cfh           | 1.082  | 10.984 | 2.730  | 0.021 | 0.249 | -3.267 |
| Hpgd          | -0.822 | 12.431 | -2.729 | 0.021 | 0.249 | -3.269 |
| Clic3         | -0.748 | 7.926  | -2.729 | 0.021 | 0.249 | -3.269 |
| Nucb2         | -0.807 | 11.856 | -2.729 | 0.021 | 0.249 | -3.269 |
| 1810074P20Rik | -0.320 | 11.029 | -2.729 | 0.021 | 0.249 | -3.269 |
| Ythdf2        | -0.297 | 11.007 | -2.728 | 0.021 | 0.249 | -3.270 |
| Ppplca        | -0.369 | 12.132 | -2.728 | 0.021 | 0.249 | -3.270 |
| 2310002J15Rik | -0.973 | 7.581  | -2.728 | 0.021 | 0.249 | -3.270 |
| Ncf4          | 0.507  | 7.431  | 2.727  | 0.021 | 0.249 | -3.271 |
| Acyp2         | -0.380 | 7.680  | -2.727 | 0.021 | 0.249 | -3.272 |
| Mrgpre        | 0.286  | 7.626  | 2.726  | 0.021 | 0.249 | -3.273 |
| Ccdc91        | 0.404  | 10.357 | 2.726  | 0.021 | 0.249 | -3.274 |
| Saa3          | 2.020  | 8.357  | 2.726  | 0.021 | 0.249 | -3.274 |
| Ddx50         | -0.327 | 11.700 | -2.726 | 0.021 | 0.249 | -3.274 |
| Pbx1          | -0.308 | 10.739 | -2.725 | 0.021 | 0.249 | -3.275 |
| Lrrc10b       | -0.405 | 7.507  | -2.725 | 0.021 | 0.249 | -3.276 |
| Bicc1         | 0.591  | 8.884  | 2.724  | 0.021 | 0.249 | -3.276 |
| Chchd6        | -0.227 | 7.880  | -2.723 | 0.022 | 0.250 | -3.279 |
| Nt5cla        | 0.609  | 6.838  | 2.722  | 0.022 | 0.250 | -3.279 |
| Npepl1        | -0.259 | 9.659  | -2.722 | 0.022 | 0.250 | -3.280 |
| I11f9         | 0.788  | 7.095  | 2.722  | 0.022 | 0.250 | -3.280 |
| 1810012K08Rik | -0.286 | 6.889  | -2.721 | 0.022 | 0.250 | -3.282 |
| Rbm20         | -0.746 | 8.452  | -2.720 | 0.022 | 0.250 | -3.282 |
| Stxbp51       | 0.377  | 7.320  | 2.720  | 0.022 | 0.250 | -3.283 |
| AI838599      | -0.426 | 7.251  | -2.720 | 0.022 | 0.250 | -3.284 |
| Ier51         | 0.373  | 7.087  | 2.720  | 0.022 | 0.250 | -3.284 |
| 9430015G10Rik | 0.341  | 8.397  | 2.719  | 0.022 | 0.250 | -3.284 |
| AI606181      | -0.357 | 7.946  | -2.718 | 0.022 | 0.250 | -3.286 |
| Pdia3         | -0.565 | 15.678 | -2.717 | 0.022 | 0.250 | -3.287 |
| BB557941      | -0.313 | 6.650  | -2.717 | 0.022 | 0.250 | -3.287 |
| Myo6          | 0.281  | 12.883 | 2.717  | 0.022 | 0.250 | -3.287 |
| Avpr1a        | -0.668 | 7.292  | -2.717 | 0.022 | 0.250 | -3.287 |
| Dock4         | 0.724  | 9.510  | 2.717  | 0.022 | 0.250 | -3.288 |

|          |        |        |        |       |       |        |
|----------|--------|--------|--------|-------|-------|--------|
| Slbp     | 0.268  | 10.665 | 2.716  | 0.022 | 0.250 | -3.289 |
| Gm10699  | -0.173 | 6.807  | -2.716 | 0.022 | 0.250 | -3.289 |
| Commd3   | -0.240 | 10.773 | -2.716 | 0.022 | 0.250 | -3.289 |
| Slc11a2  | 3.283  | 11.725 | 2.716  | 0.022 | 0.250 | -3.289 |
| Il21r    | 0.478  | 6.988  | 2.716  | 0.022 | 0.250 | -3.290 |
| Itga10   | -0.407 | 7.204  | -2.716 | 0.022 | 0.250 | -3.290 |
| Rusc2    | -0.528 | 8.354  | -2.715 | 0.022 | 0.250 | -3.291 |
| Tbc1d10c | 0.376  | 7.136  | 2.715  | 0.022 | 0.250 | -3.291 |
| Fbx15    | 0.372  | 11.785 | 2.715  | 0.022 | 0.250 | -3.291 |
| Blzf1    | -0.236 | 10.309 | -2.715 | 0.022 | 0.250 | -3.291 |
| Dstn     | -0.369 | 14.914 | -2.713 | 0.022 | 0.251 | -3.294 |
| Nudt18   | 0.383  | 9.211  | 2.713  | 0.022 | 0.251 | -3.294 |
| Ccdc136  | -0.525 | 7.293  | -2.712 | 0.022 | 0.251 | -3.296 |
| Trpc1    | 0.299  | 7.381  | 2.711  | 0.022 | 0.251 | -3.297 |
| Cob111   | -0.484 | 10.073 | -2.711 | 0.022 | 0.251 | -3.297 |
| Eif2ak2  | 0.187  | 10.976 | 2.710  | 0.022 | 0.251 | -3.300 |
| Emb      | 0.526  | 8.265  | 2.709  | 0.022 | 0.251 | -3.300 |
| Aass     | -1.007 | 8.744  | -2.709 | 0.022 | 0.252 | -3.301 |
| Zfp825   | 0.282  | 8.473  | 2.708  | 0.022 | 0.252 | -3.302 |
| Gm11457  | -0.314 | 6.749  | -2.708 | 0.022 | 0.252 | -3.302 |
| Abca2    | -0.341 | 9.242  | -2.706 | 0.022 | 0.252 | -3.305 |
| Ubiad1   | 0.309  | 8.847  | 2.706  | 0.022 | 0.252 | -3.305 |
| Mtf2     | 0.384  | 9.773  | 2.706  | 0.022 | 0.252 | -3.306 |
| Anp32a   | -0.373 | 12.808 | -2.705 | 0.022 | 0.252 | -3.307 |
| Rassf1   | 0.329  | 9.883  | 2.705  | 0.022 | 0.252 | -3.307 |
| Pdss1    | 0.688  | 9.140  | 2.704  | 0.022 | 0.253 | -3.309 |
| Atp8a2   | -0.312 | 9.756  | -2.703 | 0.022 | 0.253 | -3.309 |
| Ighv4-1  | 1.292  | 7.461  | 2.703  | 0.022 | 0.253 | -3.309 |
| Zbp1     | 0.740  | 7.418  | 2.703  | 0.022 | 0.253 | -3.310 |
| Klf5     | 0.627  | 10.844 | 2.703  | 0.022 | 0.253 | -3.311 |
| Ccdc117  | -0.321 | 10.277 | -2.700 | 0.022 | 0.254 | -3.315 |
| Aldh3a2  | -0.604 | 12.794 | -2.697 | 0.022 | 0.255 | -3.319 |
| Pstpip1  | -1.258 | 8.841  | -2.697 | 0.022 | 0.255 | -3.319 |
| Gal3st1  | -1.224 | 10.047 | -2.696 | 0.022 | 0.255 | -3.321 |
| Dhfr     | 0.651  | 9.639  | 2.696  | 0.022 | 0.255 | -3.321 |
| Bmper    | 0.683  | 7.651  | 2.695  | 0.023 | 0.255 | -3.322 |
| Tmem200a | -0.558 | 7.168  | -2.695 | 0.023 | 0.255 | -3.323 |
| Lrrc4    | -0.846 | 7.530  | -2.695 | 0.023 | 0.255 | -3.323 |
| Gm15950  | -0.249 | 7.271  | -2.693 | 0.023 | 0.256 | -3.326 |
| Pigr     | 2.655  | 15.359 | 2.693  | 0.023 | 0.256 | -3.326 |
| Sox21    | -1.801 | 10.370 | -2.693 | 0.023 | 0.256 | -3.326 |
| Gm18284  | -0.381 | 7.347  | -2.692 | 0.023 | 0.256 | -3.328 |
| Afp      | 0.540  | 7.697  | 2.691  | 0.023 | 0.256 | -3.329 |
| Adcy8    | 0.773  | 7.166  | 2.691  | 0.023 | 0.256 | -3.330 |
| Ns11     | 0.430  | 7.935  | 2.690  | 0.023 | 0.256 | -3.330 |
| Zfp775   | 0.342  | 7.692  | 2.690  | 0.023 | 0.256 | -3.330 |
| Socs6    | 0.374  | 10.514 | 2.690  | 0.023 | 0.256 | -3.331 |
| Ppp1r16b | 0.661  | 7.840  | 2.690  | 0.023 | 0.256 | -3.331 |
| Gm15374  | -0.247 | 6.475  | -2.690 | 0.023 | 0.256 | -3.331 |
| Gstal    | -1.349 | 14.687 | -2.689 | 0.023 | 0.256 | -3.332 |

|               |        |        |        |       |       |        |
|---------------|--------|--------|--------|-------|-------|--------|
| 6330512M04Rik | -0.577 | 6.778  | -2.688 | 0.023 | 0.256 | -3.333 |
| Sphkap        | -0.617 | 7.060  | -2.688 | 0.023 | 0.256 | -3.334 |
| Fut8          | -0.392 | 12.109 | -2.687 | 0.023 | 0.256 | -3.335 |
| Mavs          | -0.275 | 9.807  | -2.687 | 0.023 | 0.256 | -3.335 |
| Cd3001f       | 0.498  | 8.294  | 2.687  | 0.023 | 0.256 | -3.336 |
| Rnpepl1       | -0.329 | 10.332 | -2.687 | 0.023 | 0.256 | -3.336 |
| Papss1        | -0.491 | 11.695 | -2.686 | 0.023 | 0.256 | -3.336 |
| Cass4         | 0.332  | 6.806  | 2.686  | 0.023 | 0.256 | -3.338 |
| Unc79         | -0.281 | 6.868  | -2.685 | 0.023 | 0.256 | -3.338 |
| Lims2         | -0.686 | 8.060  | -2.685 | 0.023 | 0.256 | -3.339 |
| Trim26        | 0.286  | 10.698 | 2.685  | 0.023 | 0.256 | -3.339 |
| Pnck          | -0.415 | 7.650  | -2.684 | 0.023 | 0.256 | -3.340 |
| Plala         | 0.678  | 7.612  | 2.684  | 0.023 | 0.256 | -3.340 |
| Tmem110       | -0.349 | 8.889  | -2.684 | 0.023 | 0.256 | -3.340 |
| Lrrc17        | -0.531 | 7.506  | -2.683 | 0.023 | 0.257 | -3.342 |
| Bag1          | -0.488 | 12.891 | -2.682 | 0.023 | 0.257 | -3.343 |
| Iws1          | 0.216  | 10.862 | 2.682  | 0.023 | 0.257 | -3.343 |
| Pop5          | -0.206 | 9.002  | -2.682 | 0.023 | 0.257 | -3.344 |
| Tmem63b       | -0.596 | 10.847 | -2.681 | 0.023 | 0.257 | -3.344 |
| Fstl5         | -0.528 | 6.699  | -2.681 | 0.023 | 0.257 | -3.345 |
| Tm4sf19       | 0.407  | 6.601  | 2.680  | 0.023 | 0.257 | -3.346 |
| Spats2l       | -0.521 | 11.239 | -2.680 | 0.023 | 0.257 | -3.346 |
| Rpl38-ps2     | -0.355 | 8.978  | -2.680 | 0.023 | 0.257 | -3.347 |
| Spag5         | 0.585  | 9.178  | 2.679  | 0.023 | 0.257 | -3.348 |
| Bcdin3d       | -0.286 | 7.969  | -2.679 | 0.023 | 0.257 | -3.349 |
| Gm11400       | -0.251 | 6.738  | -2.679 | 0.023 | 0.257 | -3.349 |
| Cyp2e1        | -0.485 | 6.835  | -2.678 | 0.023 | 0.257 | -3.350 |
| Polr3d        | -0.259 | 9.831  | -2.677 | 0.023 | 0.257 | -3.352 |
| AC158672.1    | 0.802  | 7.132  | 2.677  | 0.023 | 0.257 | -3.352 |
| Anapc1        | 0.206  | 11.250 | 2.676  | 0.023 | 0.257 | -3.352 |
| Ppp1r12b      | -0.962 | 10.410 | -2.676 | 0.023 | 0.257 | -3.353 |
| Coll5a1       | 0.677  | 10.023 | 2.676  | 0.023 | 0.257 | -3.353 |
| Crispld1      | -0.281 | 7.051  | -2.675 | 0.023 | 0.257 | -3.355 |
| Gm16247       | -0.530 | 7.467  | -2.674 | 0.023 | 0.257 | -3.355 |
| Gpr19         | 0.354  | 7.628  | 2.674  | 0.023 | 0.257 | -3.356 |
| Tigd4         | 0.278  | 7.145  | 2.674  | 0.023 | 0.257 | -3.356 |
| Rpusd1        | -0.264 | 7.618  | -2.674 | 0.023 | 0.257 | -3.356 |
| B230312C02Rik | -0.407 | 6.740  | -2.674 | 0.023 | 0.257 | -3.357 |
| Fam198b       | 0.567  | 8.710  | 2.674  | 0.023 | 0.257 | -3.357 |
| Mafb          | 0.803  | 8.695  | 2.673  | 0.023 | 0.257 | -3.357 |
| Snx22         | -0.541 | 7.509  | -2.673 | 0.023 | 0.257 | -3.357 |
| Gm6335        | -0.164 | 6.807  | -2.673 | 0.023 | 0.257 | -3.357 |
| Rin2          | 0.379  | 10.970 | 2.673  | 0.023 | 0.257 | -3.358 |
| Ubl5          | -0.349 | 11.129 | -2.673 | 0.023 | 0.257 | -3.358 |
| 4930506C21Rik | 0.403  | 7.010  | 2.673  | 0.023 | 0.257 | -3.358 |
| Slc20a2       | 0.504  | 9.412  | 2.673  | 0.023 | 0.257 | -3.358 |
| Peg10         | -0.453 | 7.055  | -2.672 | 0.023 | 0.257 | -3.359 |
| Col7a1        | 0.491  | 7.608  | 2.672  | 0.023 | 0.257 | -3.359 |
| Gdf15         | 0.284  | 6.689  | 2.671  | 0.023 | 0.257 | -3.360 |
| Gm15887       | -0.203 | 6.453  | -2.671 | 0.023 | 0.257 | -3.361 |



|               |        |        |        |       |       |        |
|---------------|--------|--------|--------|-------|-------|--------|
| Tm9sf1        | 0.266  | 11.019 | 2.671  | 0.023 | 0.257 | -3.361 |
| Hand2         | -1.152 | 8.328  | -2.671 | 0.024 | 0.257 | -3.361 |
| Clec4a2       | 0.478  | 7.373  | 2.670  | 0.024 | 0.258 | -3.363 |
| Acat2         | 0.389  | 10.199 | 2.668  | 0.024 | 0.258 | -3.365 |
| Pcgf3         | -0.849 | 11.948 | -2.668 | 0.024 | 0.258 | -3.365 |
| Dnmt31        | 0.423  | 6.817  | 2.668  | 0.024 | 0.258 | -3.366 |
| AC103368.1    | -0.197 | 6.450  | -2.668 | 0.024 | 0.258 | -3.366 |
| Myh13         | -0.454 | 6.739  | -2.667 | 0.024 | 0.258 | -3.367 |
| Dnajb11       | -0.552 | 12.861 | -2.667 | 0.024 | 0.258 | -3.368 |
| Atrn          | 0.460  | 11.297 | 2.666  | 0.024 | 0.258 | -3.369 |
| Col6a4        | 0.675  | 9.923  | 2.665  | 0.024 | 0.259 | -3.370 |
| Shf           | 1.689  | 9.858  | 2.665  | 0.024 | 0.259 | -3.370 |
| Nkx3-2        | -0.351 | 6.765  | -2.664 | 0.024 | 0.259 | -3.372 |
| Hiplr         | -0.407 | 11.449 | -2.664 | 0.024 | 0.259 | -3.372 |
| Gnaq          | -0.511 | 11.728 | -2.662 | 0.024 | 0.260 | -3.375 |
| Kctd18        | 0.325  | 8.743  | 2.661  | 0.024 | 0.260 | -3.376 |
| Ddx5          | 0.226  | 14.686 | 2.661  | 0.024 | 0.260 | -3.377 |
| Gm15731       | 0.218  | 6.757  | 2.660  | 0.024 | 0.260 | -3.378 |
| Kif19a        | 0.289  | 7.027  | 2.660  | 0.024 | 0.260 | -3.378 |
| Atg5          | -0.188 | 10.827 | -2.660 | 0.024 | 0.260 | -3.379 |
| Cstad         | 0.335  | 6.624  | 2.659  | 0.024 | 0.260 | -3.379 |
| Rpl28         | -0.269 | 12.488 | -2.659 | 0.024 | 0.260 | -3.379 |
| Manf          | -0.837 | 13.478 | -2.659 | 0.024 | 0.260 | -3.380 |
| Smad1         | -0.259 | 10.239 | -2.658 | 0.024 | 0.260 | -3.381 |
| C6            | 0.939  | 7.327  | 2.658  | 0.024 | 0.260 | -3.381 |
| Syp           | -0.638 | 7.796  | -2.658 | 0.024 | 0.260 | -3.381 |
| Tsen34        | -0.298 | 10.294 | -2.658 | 0.024 | 0.260 | -3.382 |
| Mir1199       | -0.419 | 6.786  | -2.658 | 0.024 | 0.260 | -3.382 |
| Slc22a23      | -0.566 | 11.351 | -2.657 | 0.024 | 0.260 | -3.383 |
| 9630013K17Rik | 0.337  | 6.792  | 2.657  | 0.024 | 0.260 | -3.383 |
| Kcnbl         | -0.400 | 7.065  | -2.657 | 0.024 | 0.260 | -3.383 |
| Npnt          | 0.574  | 10.524 | 2.656  | 0.024 | 0.260 | -3.384 |
| Ryr3          | -0.758 | 7.426  | -2.655 | 0.024 | 0.260 | -3.386 |
| Phyhip        | 0.610  | 7.195  | 2.655  | 0.024 | 0.260 | -3.386 |
| Gabra1        | -0.679 | 7.290  | -2.653 | 0.024 | 0.260 | -3.389 |
| Rnf180        | 0.310  | 6.994  | 2.653  | 0.024 | 0.260 | -3.389 |
| Mfsd7b        | 0.663  | 8.951  | 2.653  | 0.024 | 0.260 | -3.389 |
| Fbxo33        | -0.262 | 9.777  | -2.653 | 0.024 | 0.261 | -3.390 |
| Naf1          | 0.337  | 8.127  | 2.652  | 0.024 | 0.261 | -3.390 |
| Aplp2         | -0.358 | 13.629 | -2.652 | 0.024 | 0.261 | -3.391 |
| Adcy6         | -0.265 | 12.432 | -2.652 | 0.024 | 0.261 | -3.391 |
| Tmed6         | -0.742 | 8.686  | -2.652 | 0.024 | 0.261 | -3.392 |
| Gm9790        | -0.409 | 7.826  | -2.651 | 0.024 | 0.261 | -3.393 |
| Cib1          | -0.235 | 11.149 | -2.651 | 0.024 | 0.261 | -3.393 |
| Shd           | -0.307 | 6.665  | -2.650 | 0.024 | 0.261 | -3.394 |
| Ocstamp       | 0.380  | 7.007  | 2.650  | 0.024 | 0.261 | -3.394 |
| Med26         | 0.282  | 8.147  | 2.649  | 0.024 | 0.261 | -3.395 |
| Gm10157       | -0.271 | 7.994  | -2.649 | 0.024 | 0.261 | -3.396 |
| Gm16216       | -0.214 | 6.499  | -2.648 | 0.024 | 0.261 | -3.397 |
| Rin1          | 0.617  | 7.526  | 2.648  | 0.024 | 0.261 | -3.397 |

|               |        |        |        |       |       |        |
|---------------|--------|--------|--------|-------|-------|--------|
| Gm15910       | -0.531 | 7.214  | -2.648 | 0.024 | 0.261 | -3.398 |
| Prnp          | -0.530 | 9.930  | -2.647 | 0.024 | 0.261 | -3.399 |
| Fcgr4         | 0.453  | 7.399  | 2.647  | 0.024 | 0.261 | -3.399 |
| 3110056003Rik | -0.292 | 8.803  | -2.647 | 0.024 | 0.261 | -3.399 |
| Nedd9         | 0.514  | 11.482 | 2.647  | 0.024 | 0.261 | -3.399 |
| Pdcd11g2      | 0.428  | 6.648  | 2.646  | 0.025 | 0.261 | -3.400 |
| Synpr         | -0.363 | 6.683  | -2.646 | 0.025 | 0.261 | -3.400 |
| Cald1         | -0.839 | 12.629 | -2.646 | 0.025 | 0.261 | -3.400 |
| Foxp3         | 0.490  | 6.796  | 2.646  | 0.025 | 0.261 | -3.400 |
| Rcsd1         | 0.316  | 8.290  | 2.646  | 0.025 | 0.261 | -3.401 |
| 1110017F19Rik | -1.099 | 12.109 | -2.645 | 0.025 | 0.261 | -3.402 |
| Mcm4          | 0.488  | 10.088 | 2.645  | 0.025 | 0.261 | -3.402 |
| Ptdss1        | -0.384 | 11.939 | -2.644 | 0.025 | 0.261 | -3.403 |
| D15Ert621e    | -0.418 | 12.926 | -2.644 | 0.025 | 0.261 | -3.403 |
| Tspyl1        | -0.245 | 10.554 | -2.643 | 0.025 | 0.261 | -3.404 |
| Slc13a2       | 0.681  | 6.904  | 2.643  | 0.025 | 0.261 | -3.405 |
| Cst7          | 0.347  | 6.865  | 2.643  | 0.025 | 0.261 | -3.405 |
| Fam160b2      | -0.366 | 9.971  | -2.643 | 0.025 | 0.261 | -3.406 |
| Hic1          | 0.385  | 7.823  | 2.642  | 0.025 | 0.261 | -3.406 |
| E430025E21Rik | 0.245  | 10.591 | 2.642  | 0.025 | 0.261 | -3.406 |
| 2310050B05Rik | -0.605 | 6.949  | -2.641 | 0.025 | 0.261 | -3.408 |
| Gm9833        | 0.454  | 7.631  | 2.641  | 0.025 | 0.261 | -3.408 |
| Kcne4         | 0.507  | 7.653  | 2.641  | 0.025 | 0.262 | -3.409 |
| Anapc13       | -0.329 | 10.504 | -2.640 | 0.025 | 0.262 | -3.409 |
| Scn1a         | -0.911 | 10.505 | -2.640 | 0.025 | 0.262 | -3.410 |
| Gm13772       | 0.300  | 6.611  | 2.640  | 0.025 | 0.262 | -3.410 |
| Fxr1          | 0.365  | 11.028 | 2.639  | 0.025 | 0.262 | -3.411 |
| Amy1          | -0.627 | 7.507  | -2.639 | 0.025 | 0.262 | -3.411 |
| Gm12506       | -0.639 | 7.414  | -2.639 | 0.025 | 0.262 | -3.412 |
| St6gal1       | 0.588  | 8.618  | 2.639  | 0.025 | 0.262 | -3.412 |
| Tubgcp6       | 0.279  | 9.078  | 2.638  | 0.025 | 0.262 | -3.413 |
| Ccl2          | 0.860  | 7.333  | 2.638  | 0.025 | 0.262 | -3.414 |
| Bcap29        | 0.256  | 9.277  | 2.637  | 0.025 | 0.262 | -3.415 |
| P2ry13        | 0.444  | 7.495  | 2.637  | 0.025 | 0.262 | -3.415 |
| Ppargc1a      | 0.770  | 9.593  | 2.636  | 0.025 | 0.262 | -3.416 |
| Nampt         | 0.367  | 11.355 | 2.636  | 0.025 | 0.262 | -3.416 |
| Faah          | 0.886  | 9.548  | 2.636  | 0.025 | 0.262 | -3.416 |
| Vwf           | 0.486  | 9.542  | 2.636  | 0.025 | 0.262 | -3.416 |
| Sipa111       | 0.765  | 10.073 | 2.636  | 0.025 | 0.262 | -3.416 |
| Nrn1          | -0.946 | 7.421  | -2.636 | 0.025 | 0.262 | -3.416 |
| Gm12966       | 0.427  | 9.647  | 2.635  | 0.025 | 0.262 | -3.418 |
| Itfgl         | -0.234 | 11.917 | -2.635 | 0.025 | 0.262 | -3.418 |
| Rdh13         | -0.507 | 10.591 | -2.635 | 0.025 | 0.262 | -3.418 |
| Gm12284       | -0.300 | 6.626  | -2.635 | 0.025 | 0.262 | -3.419 |
| Gm5778        | -0.294 | 6.622  | -2.634 | 0.025 | 0.262 | -3.419 |
| Morc3         | 0.408  | 10.735 | 2.633  | 0.025 | 0.262 | -3.421 |
| Gm13517       | -0.213 | 6.563  | -2.631 | 0.025 | 0.263 | -3.423 |
| Ap1m1         | 0.403  | 9.201  | 2.631  | 0.025 | 0.263 | -3.424 |
| Calhm2        | 0.260  | 7.382  | 2.629  | 0.025 | 0.264 | -3.427 |
| Yipf1         | -0.383 | 10.854 | -2.628 | 0.025 | 0.264 | -3.429 |

|               |        |        |        |       |       |        |
|---------------|--------|--------|--------|-------|-------|--------|
| Dusp10        | 0.446  | 8.106  | 2.628  | 0.025 | 0.264 | -3.429 |
| 9630033F20Rik | -0.809 | 9.955  | -2.627 | 0.025 | 0.264 | -3.430 |
| Zwilch        | 0.361  | 8.595  | 2.627  | 0.025 | 0.264 | -3.430 |
| Alb           | -0.933 | 7.784  | -2.627 | 0.025 | 0.264 | -3.430 |
| Serpinc1      | -0.245 | 6.869  | -2.627 | 0.025 | 0.264 | -3.430 |
| Dnajb6        | -0.319 | 11.313 | -2.626 | 0.025 | 0.264 | -3.431 |
| Fam5b         | -0.969 | 7.042  | -2.625 | 0.025 | 0.264 | -3.433 |
| Hmgcr         | 0.451  | 12.245 | 2.625  | 0.025 | 0.264 | -3.434 |
| Entpd1        | 0.470  | 9.526  | 2.624  | 0.025 | 0.265 | -3.436 |
| Ccb11         | -0.277 | 8.869  | -2.623 | 0.026 | 0.265 | -3.437 |
| Pvr12         | 0.262  | 11.395 | 2.623  | 0.026 | 0.265 | -3.437 |
| Lphn1         | -0.428 | 8.352  | -2.621 | 0.026 | 0.265 | -3.440 |
| 5031439G07Rik | 0.335  | 9.911  | 2.621  | 0.026 | 0.265 | -3.440 |
| Cbr2          | -0.374 | 7.404  | -2.621 | 0.026 | 0.265 | -3.440 |
| Rgs6          | -0.323 | 7.028  | -2.620 | 0.026 | 0.265 | -3.442 |
| P4hb          | -0.489 | 15.706 | -2.620 | 0.026 | 0.265 | -3.442 |
| Ecml          | 0.396  | 9.404  | 2.620  | 0.026 | 0.265 | -3.442 |
| Scn7a         | -0.606 | 8.846  | -2.619 | 0.026 | 0.265 | -3.443 |
| Trpa1         | 0.784  | 8.382  | 2.619  | 0.026 | 0.265 | -3.443 |
| Sirt7         | -0.285 | 10.362 | -2.619 | 0.026 | 0.265 | -3.444 |
| I11r12        | 0.699  | 7.654  | 2.619  | 0.026 | 0.265 | -3.444 |
| Zfp791        | -0.470 | 8.797  | -2.618 | 0.026 | 0.265 | -3.444 |
| Chrn4         | -0.321 | 6.970  | -2.618 | 0.026 | 0.265 | -3.444 |
| 1810026J23Rik | -0.218 | 10.447 | -2.618 | 0.026 | 0.265 | -3.445 |
| Mgam          | 3.760  | 11.389 | 2.618  | 0.026 | 0.265 | -3.445 |
| Irf1          | 1.115  | 10.290 | 2.618  | 0.026 | 0.265 | -3.445 |
| Aifm1         | 0.283  | 11.552 | 2.617  | 0.026 | 0.266 | -3.447 |
| Krt1          | -0.379 | 6.764  | -2.616 | 0.026 | 0.266 | -3.447 |
| Exo1          | 0.344  | 7.999  | 2.616  | 0.026 | 0.266 | -3.448 |
| Rapgef11      | -0.495 | 9.593  | -2.616 | 0.026 | 0.266 | -3.448 |
| E2f6          | 0.202  | 9.286  | 2.615  | 0.026 | 0.266 | -3.449 |
| Cisd1         | -0.282 | 10.263 | -2.615 | 0.026 | 0.266 | -3.450 |
| Tmem50a       | -0.312 | 11.380 | -2.615 | 0.026 | 0.266 | -3.450 |
| Zfp706        | -0.316 | 12.170 | -2.615 | 0.026 | 0.266 | -3.450 |
| Tor3a         | -0.683 | 10.592 | -2.614 | 0.026 | 0.266 | -3.450 |
| Gm14850       | 0.789  | 6.746  | 2.614  | 0.026 | 0.266 | -3.452 |
| 4933439K11Rik | -0.338 | 7.662  | -2.613 | 0.026 | 0.266 | -3.452 |
| Os9           | -0.290 | 13.155 | -2.613 | 0.026 | 0.266 | -3.453 |
| Lama4         | 0.437  | 9.717  | 2.611  | 0.026 | 0.266 | -3.455 |
| Map11c3a      | -0.569 | 9.466  | -2.611 | 0.026 | 0.266 | -3.455 |
| 3110040N11Rik | -0.299 | 9.289  | -2.611 | 0.026 | 0.266 | -3.456 |
| Jak3          | 0.317  | 8.279  | 2.611  | 0.026 | 0.266 | -3.456 |
| Nup98         | 0.178  | 9.903  | 2.610  | 0.026 | 0.266 | -3.457 |
| Cnot7         | -0.208 | 10.797 | -2.610 | 0.026 | 0.267 | -3.457 |
| Apol7c        | 0.981  | 8.560  | 2.609  | 0.026 | 0.267 | -3.460 |
| Bcas1         | -1.725 | 12.658 | -2.608 | 0.026 | 0.267 | -3.460 |
| Ccdc164       | -0.488 | 7.459  | -2.606 | 0.026 | 0.268 | -3.463 |
| Tmed8         | -0.434 | 9.261  | -2.606 | 0.026 | 0.268 | -3.464 |
| Vash1         | 0.294  | 7.190  | 2.606  | 0.026 | 0.268 | -3.464 |
| Aldoc         | 0.938  | 9.232  | 2.606  | 0.026 | 0.268 | -3.464 |

|               |        |        |        |       |       |        |
|---------------|--------|--------|--------|-------|-------|--------|
| 2310042E22Rik | -1.693 | 11.239 | -2.605 | 0.026 | 0.268 | -3.465 |
| Plekha1       | 0.327  | 11.575 | 2.605  | 0.026 | 0.268 | -3.465 |
| Scg3          | -0.608 | 7.565  | -2.605 | 0.026 | 0.268 | -3.466 |
| Pdzd4         | -0.363 | 7.633  | -2.604 | 0.026 | 0.268 | -3.467 |
| Cadm2         | -0.225 | 6.819  | -2.603 | 0.026 | 0.268 | -3.468 |
| Gbp7          | 0.429  | 9.292  | 2.603  | 0.026 | 0.268 | -3.469 |
| Exoc6b        | 0.287  | 10.392 | 2.602  | 0.026 | 0.269 | -3.470 |
| Fcgr2b        | 0.488  | 8.236  | 2.602  | 0.026 | 0.269 | -3.471 |
| Ino80c        | 0.226  | 10.282 | 2.602  | 0.026 | 0.269 | -3.471 |
| Osmr          | 0.926  | 9.495  | 2.601  | 0.026 | 0.269 | -3.471 |
| Sprr2f        | 0.441  | 6.572  | 2.601  | 0.026 | 0.269 | -3.472 |
| 6720463M24Rik | 0.294  | 8.988  | 2.601  | 0.027 | 0.269 | -3.472 |
| Noval         | -0.386 | 7.152  | -2.600 | 0.027 | 0.269 | -3.473 |
| Slc6a8        | 1.184  | 11.277 | 2.600  | 0.027 | 0.269 | -3.473 |
| Lrp2bp        | 0.564  | 6.758  | 2.599  | 0.027 | 0.269 | -3.475 |
| Zfp553        | 0.219  | 8.754  | 2.598  | 0.027 | 0.269 | -3.476 |
| Islr          | -0.480 | 8.287  | -2.597 | 0.027 | 0.270 | -3.478 |
| Gm10819       | -0.349 | 7.475  | -2.596 | 0.027 | 0.270 | -3.479 |
| Rpl36-ps3     | -0.193 | 7.462  | -2.596 | 0.027 | 0.270 | -3.479 |
| Pfdn5         | -0.274 | 10.836 | -2.595 | 0.027 | 0.270 | -3.480 |
| 1110032A04Rik | -2.247 | 13.974 | -2.595 | 0.027 | 0.270 | -3.481 |
| Wwp1          | -0.388 | 11.930 | -2.594 | 0.027 | 0.270 | -3.483 |
| Slc4a3        | -0.307 | 7.910  | -2.594 | 0.027 | 0.270 | -3.483 |
| Gm22          | 0.335  | 6.733  | 2.593  | 0.027 | 0.270 | -3.483 |
| Fam195a       | -0.426 | 8.700  | -2.593 | 0.027 | 0.270 | -3.483 |
| Inf2          | 0.716  | 8.794  | 2.593  | 0.027 | 0.270 | -3.485 |
| Isl2          | -0.504 | 6.668  | -2.593 | 0.027 | 0.270 | -3.485 |
| Taf1d         | 0.262  | 9.846  | 2.592  | 0.027 | 0.270 | -3.485 |
| Chaf1a        | 0.534  | 8.917  | 2.592  | 0.027 | 0.270 | -3.485 |
| Zbed6         | 0.397  | 10.768 | 2.592  | 0.027 | 0.270 | -3.486 |
| Ifnar2        | 0.455  | 8.971  | 2.592  | 0.027 | 0.270 | -3.486 |
| Klrd1         | 0.592  | 7.035  | 2.592  | 0.027 | 0.270 | -3.486 |
| Brd3          | -0.259 | 10.429 | -2.591 | 0.027 | 0.270 | -3.487 |
| Mn1           | -0.392 | 7.279  | -2.591 | 0.027 | 0.270 | -3.487 |
| Fbn1          | 0.358  | 10.270 | 2.591  | 0.027 | 0.270 | -3.488 |
| Acot9         | 0.382  | 10.368 | 2.591  | 0.027 | 0.270 | -3.488 |
| Cd86          | 0.601  | 7.600  | 2.590  | 0.027 | 0.270 | -3.489 |
| Rcan3         | -0.428 | 10.682 | -2.589 | 0.027 | 0.270 | -3.490 |
| Arhgef2       | 0.340  | 10.633 | 2.589  | 0.027 | 0.270 | -3.491 |
| Pld4          | 0.506  | 7.774  | 2.589  | 0.027 | 0.270 | -3.491 |
| Isoc1         | -0.462 | 11.074 | -2.589 | 0.027 | 0.270 | -3.491 |
| Cd302         | 0.787  | 8.974  | 2.588  | 0.027 | 0.270 | -3.492 |
| Mmadhc        | -0.341 | 10.909 | -2.588 | 0.027 | 0.270 | -3.492 |
| A930018M24Rik | 0.454  | 6.972  | 2.588  | 0.027 | 0.270 | -3.492 |
| Cyp8b1        | 0.267  | 6.530  | 2.588  | 0.027 | 0.270 | -3.492 |
| Cym           | 1.133  | 7.186  | 2.588  | 0.027 | 0.270 | -3.493 |
| Klri2         | 0.382  | 6.650  | 2.588  | 0.027 | 0.270 | -3.493 |
| Cacna2d2      | -0.415 | 7.216  | -2.587 | 0.027 | 0.270 | -3.493 |
| B3galt1       | -0.693 | 7.563  | -2.587 | 0.027 | 0.270 | -3.493 |
| Hspb1         | -0.522 | 7.741  | -2.587 | 0.027 | 0.270 | -3.494 |

|               |        |        |        |       |       |        |
|---------------|--------|--------|--------|-------|-------|--------|
| Gm12576       | 0.406  | 7.149  | 2.587  | 0.027 | 0.270 | -3.494 |
| Rbl1          | 0.331  | 9.396  | 2.587  | 0.027 | 0.270 | -3.494 |
| Gm221         | 0.296  | 7.021  | 2.586  | 0.027 | 0.270 | -3.495 |
| Tceal3        | -0.634 | 7.493  | -2.586 | 0.027 | 0.270 | -3.495 |
| Gpa33         | 0.957  | 12.699 | 2.586  | 0.027 | 0.270 | -3.495 |
| Phgdh         | -0.283 | 8.850  | -2.586 | 0.027 | 0.270 | -3.496 |
| Atxn10        | -0.527 | 10.392 | -2.585 | 0.027 | 0.270 | -3.496 |
| Camk4         | 0.451  | 8.386  | 2.585  | 0.027 | 0.270 | -3.497 |
| Fgf10         | -0.578 | 8.163  | -2.584 | 0.027 | 0.270 | -3.498 |
| 0910001L09Rik | -0.385 | 9.855  | -2.583 | 0.027 | 0.270 | -3.499 |
| Ttc9          | 0.942  | 8.566  | 2.583  | 0.027 | 0.270 | -3.500 |
| Cd200         | 0.442  | 9.238  | 2.583  | 0.027 | 0.270 | -3.500 |
| Zfp748        | -0.202 | 7.435  | -2.583 | 0.027 | 0.270 | -3.500 |
| Sh3bgr13      | -0.678 | 10.395 | -2.582 | 0.027 | 0.271 | -3.501 |
| Ppfia4        | 0.488  | 7.850  | 2.582  | 0.027 | 0.271 | -3.501 |
| Nefl          | -0.935 | 7.224  | -2.582 | 0.027 | 0.271 | -3.502 |
| Ulbpl         | 0.584  | 7.406  | 2.581  | 0.027 | 0.271 | -3.502 |
| Cdon          | -0.453 | 9.146  | -2.581 | 0.027 | 0.271 | -3.503 |
| 4932438A13Rik | 0.367  | 11.682 | 2.581  | 0.027 | 0.271 | -3.504 |
| Rab11fip5     | 0.339  | 7.980  | 2.580  | 0.027 | 0.271 | -3.504 |
| Carhsp1       | -0.308 | 11.090 | -2.580 | 0.027 | 0.271 | -3.505 |
| Cd79b         | 0.607  | 7.136  | 2.580  | 0.027 | 0.271 | -3.505 |
| Wdr67         | 0.536  | 8.749  | 2.580  | 0.027 | 0.271 | -3.505 |
| Gm6288        | 0.321  | 6.616  | 2.579  | 0.028 | 0.271 | -3.507 |
| Sh2d4a        | -0.910 | 12.308 | -2.578 | 0.028 | 0.271 | -3.508 |
| Defa22        | 0.458  | 6.580  | 2.578  | 0.028 | 0.271 | -3.508 |
| Osbpl5        | -0.647 | 9.473  | -2.578 | 0.028 | 0.271 | -3.509 |
| B3gnt5        | 0.619  | 7.357  | 2.577  | 0.028 | 0.271 | -3.509 |
| Ankrd61       | 0.182  | 7.011  | 2.576  | 0.028 | 0.272 | -3.511 |
| Grasp         | 0.558  | 8.240  | 2.575  | 0.028 | 0.272 | -3.513 |
| Akap10        | -0.225 | 9.687  | -2.575 | 0.028 | 0.272 | -3.513 |
| Arhgap15      | 0.457  | 7.482  | 2.574  | 0.028 | 0.272 | -3.514 |
| Tpm1          | -0.703 | 14.432 | -2.574 | 0.028 | 0.272 | -3.514 |
| Gsta4         | -1.518 | 15.748 | -2.574 | 0.028 | 0.272 | -3.514 |
| Oosp1         | 0.449  | 6.677  | 2.574  | 0.028 | 0.272 | -3.515 |
| Sprr2a3       | 1.094  | 12.334 | 2.573  | 0.028 | 0.272 | -3.516 |
| Nipal2        | -0.811 | 11.118 | -2.573 | 0.028 | 0.272 | -3.516 |
| Rad51ap1      | 0.358  | 8.474  | 2.573  | 0.028 | 0.272 | -3.517 |
| Barx2         | 1.049  | 8.052  | 2.573  | 0.028 | 0.272 | -3.517 |
| Prss30        | 0.611  | 7.011  | 2.571  | 0.028 | 0.272 | -3.518 |
| 9830107B12Rik | 0.270  | 6.618  | 2.571  | 0.028 | 0.272 | -3.519 |
| 1700003D09Rik | 0.472  | 7.522  | 2.571  | 0.028 | 0.272 | -3.519 |
| Slc7a11       | -1.634 | 10.164 | -2.571 | 0.028 | 0.272 | -3.519 |
| AC153855.2    | 1.353  | 8.174  | 2.571  | 0.028 | 0.272 | -3.520 |
| Gm10044       | -0.399 | 6.663  | -2.570 | 0.028 | 0.272 | -3.520 |
| 4930505A04Rik | 0.289  | 6.642  | 2.570  | 0.028 | 0.272 | -3.520 |
| Ep300         | 0.289  | 11.026 | 2.570  | 0.028 | 0.272 | -3.520 |
| Ly96          | -0.478 | 8.606  | -2.570 | 0.028 | 0.272 | -3.521 |
| Lmod1         | -1.256 | 9.866  | -2.568 | 0.028 | 0.273 | -3.524 |
| Camta1        | -0.223 | 8.635  | -2.567 | 0.028 | 0.273 | -3.525 |

|               |        |        |        |       |       |        |
|---------------|--------|--------|--------|-------|-------|--------|
| Coro2a        | 0.467  | 12.496 | 2.567  | 0.028 | 0.273 | -3.525 |
| Tmsb10        | -0.803 | 12.756 | -2.566 | 0.028 | 0.274 | -3.527 |
| Etv3          | 0.385  | 11.331 | 2.565  | 0.028 | 0.274 | -3.529 |
| Shoc2         | -0.336 | 12.392 | -2.564 | 0.028 | 0.274 | -3.530 |
| Amd1          | -0.502 | 10.579 | -2.564 | 0.028 | 0.274 | -3.530 |
| Rhoa          | -0.341 | 13.648 | -2.564 | 0.028 | 0.274 | -3.530 |
| Senp6         | -0.363 | 12.505 | -2.563 | 0.028 | 0.274 | -3.531 |
| Zfp536        | -0.330 | 6.947  | -2.562 | 0.028 | 0.275 | -3.533 |
| Slc31a2       | -0.326 | 9.368  | -2.562 | 0.028 | 0.275 | -3.533 |
| Pdlim5        | -0.469 | 12.296 | -2.562 | 0.028 | 0.275 | -3.534 |
| Ogfod2        | -0.284 | 8.973  | -2.561 | 0.028 | 0.275 | -3.534 |
| Abcb1a        | 1.418  | 9.578  | 2.560  | 0.028 | 0.275 | -3.536 |
| Tbxas1        | 0.340  | 7.745  | 2.560  | 0.028 | 0.275 | -3.537 |
| Ighg1         | 2.813  | 8.971  | 2.558  | 0.029 | 0.276 | -3.540 |
| Coll6a1       | 0.954  | 10.169 | 2.557  | 0.029 | 0.276 | -3.540 |
| Igkv12-46     | 0.930  | 7.184  | 2.557  | 0.029 | 0.276 | -3.541 |
| Fgf9          | 0.347  | 7.460  | 2.556  | 0.029 | 0.276 | -3.542 |
| Igkv6-32      | 1.407  | 7.415  | 2.555  | 0.029 | 0.277 | -3.544 |
| Kdelc2        | -0.288 | 9.574  | -2.554 | 0.029 | 0.277 | -3.546 |
| 6330549D23Rik | 0.260  | 7.057  | 2.554  | 0.029 | 0.277 | -3.546 |
| Spsb4         | 0.354  | 6.630  | 2.553  | 0.029 | 0.277 | -3.547 |
| Apol6         | -0.794 | 7.329  | -2.552 | 0.029 | 0.278 | -3.549 |
| Shc3          | -0.258 | 6.509  | -2.552 | 0.029 | 0.278 | -3.550 |
| Pigp          | -0.268 | 9.076  | -2.551 | 0.029 | 0.278 | -3.550 |
| Gsg1          | 0.257  | 6.601  | 2.551  | 0.029 | 0.278 | -3.550 |
| Dnajc22       | 0.255  | 10.378 | 2.550  | 0.029 | 0.278 | -3.552 |
| Gm10039       | -0.364 | 8.472  | -2.550 | 0.029 | 0.278 | -3.552 |
| Srl           | 0.376  | 7.731  | 2.549  | 0.029 | 0.278 | -3.553 |
| Apoalbp       | -0.401 | 10.157 | -2.549 | 0.029 | 0.278 | -3.553 |
| 6030429G01Rik | 0.444  | 6.944  | 2.548  | 0.029 | 0.278 | -3.555 |
| Hsd11         | -0.490 | 9.538  | -2.548 | 0.029 | 0.278 | -3.556 |
| Lancl2        | 0.295  | 9.035  | 2.547  | 0.029 | 0.278 | -3.556 |
| Sat1          | 0.208  | 12.133 | 2.547  | 0.029 | 0.278 | -3.557 |
| Pycr2         | -0.395 | 9.138  | -2.547 | 0.029 | 0.278 | -3.557 |
| Rad17         | -0.264 | 9.757  | -2.547 | 0.029 | 0.278 | -3.557 |
| Supt6h        | 0.374  | 12.247 | 2.547  | 0.029 | 0.278 | -3.558 |
| Gja1          | 0.682  | 10.612 | 2.546  | 0.029 | 0.278 | -3.558 |
| Mcf21         | -0.611 | 10.824 | -2.546 | 0.029 | 0.278 | -3.559 |
| Ttll11        | -0.280 | 6.853  | -2.546 | 0.029 | 0.278 | -3.559 |
| Suclg1        | -0.278 | 12.306 | -2.545 | 0.029 | 0.278 | -3.560 |
| Gm5483        | 0.389  | 6.546  | 2.545  | 0.029 | 0.278 | -3.560 |
| Blnk          | 0.699  | 8.971  | 2.545  | 0.029 | 0.278 | -3.560 |
| Myef2         | 0.336  | 9.528  | 2.544  | 0.029 | 0.278 | -3.561 |
| Rabepk        | -0.376 | 9.350  | -2.544 | 0.029 | 0.278 | -3.561 |
| Laptm4b       | -0.302 | 11.115 | -2.544 | 0.029 | 0.278 | -3.562 |
| Fxyd6         | -0.990 | 8.764  | -2.544 | 0.029 | 0.278 | -3.562 |
| Tagln3        | -0.428 | 6.822  | -2.544 | 0.029 | 0.278 | -3.562 |
| Dfna5         | 0.353  | 8.300  | 2.544  | 0.029 | 0.278 | -3.562 |
| 1110038B12Rik | 0.313  | 9.214  | 2.544  | 0.029 | 0.278 | -3.562 |
| Sun1          | -0.287 | 10.672 | -2.543 | 0.029 | 0.279 | -3.564 |

|               |        |        |        |       |       |        |
|---------------|--------|--------|--------|-------|-------|--------|
| Gm13778       | 0.250  | 6.562  | 2.543  | 0.029 | 0.279 | -3.564 |
| Slc16a11      | 0.414  | 8.116  | 2.541  | 0.029 | 0.279 | -3.567 |
| Rel           | 0.521  | 8.410  | 2.540  | 0.029 | 0.280 | -3.569 |
| Mrpl54        | -0.289 | 9.401  | -2.539 | 0.029 | 0.280 | -3.569 |
| Zfp651        | -0.493 | 8.102  | -2.539 | 0.029 | 0.280 | -3.569 |
| Gm6142        | -0.286 | 6.585  | -2.539 | 0.029 | 0.280 | -3.570 |
| Eml6          | 0.250  | 8.473  | 2.539  | 0.029 | 0.280 | -3.570 |
| Et14          | 0.330  | 11.264 | 2.539  | 0.029 | 0.280 | -3.570 |
| Gm9575        | 0.240  | 7.268  | 2.539  | 0.029 | 0.280 | -3.570 |
| Zfp239        | 0.844  | 9.109  | 2.538  | 0.029 | 0.280 | -3.571 |
| Rnf213        | 0.335  | 10.759 | 2.538  | 0.030 | 0.280 | -3.571 |
| Pafah1b3      | -0.548 | 10.193 | -2.538 | 0.030 | 0.280 | -3.571 |
| Man1a2        | 0.190  | 11.963 | 2.538  | 0.030 | 0.280 | -3.571 |
| Eif5a2        | 0.395  | 7.742  | 2.538  | 0.030 | 0.280 | -3.571 |
| Ankrd24       | -0.402 | 8.360  | -2.537 | 0.030 | 0.280 | -3.572 |
| Gzmb          | 1.273  | 7.636  | 2.537  | 0.030 | 0.280 | -3.573 |
| Gimap5        | 0.401  | 7.527  | 2.536  | 0.030 | 0.280 | -3.574 |
| Gm12824       | -0.321 | 7.261  | -2.536 | 0.030 | 0.280 | -3.574 |
| Vps28         | -0.336 | 10.955 | -2.535 | 0.030 | 0.280 | -3.575 |
| Acs14         | 0.613  | 10.423 | 2.535  | 0.030 | 0.280 | -3.575 |
| Myh11         | -1.720 | 13.599 | -2.535 | 0.030 | 0.280 | -3.576 |
| Spag4         | -0.322 | 6.888  | -2.535 | 0.030 | 0.280 | -3.576 |
| Nme2          | -0.234 | 8.891  | -2.535 | 0.030 | 0.280 | -3.576 |
| Tff1          | -2.206 | 15.437 | -2.534 | 0.030 | 0.280 | -3.577 |
| 1810063B07Rik | -0.342 | 8.631  | -2.533 | 0.030 | 0.280 | -3.579 |
| Sec1411       | -0.461 | 11.250 | -2.533 | 0.030 | 0.280 | -3.579 |
| Msl1          | -0.251 | 11.306 | -2.533 | 0.030 | 0.280 | -3.579 |
| Apod          | -0.484 | 7.382  | -2.532 | 0.030 | 0.281 | -3.580 |
| Ctps          | 0.481  | 9.948  | 2.532  | 0.030 | 0.281 | -3.581 |
| Cnm2          | 0.383  | 8.427  | 2.531  | 0.030 | 0.281 | -3.582 |
| Krtcap2       | -0.409 | 9.876  | -2.530 | 0.030 | 0.281 | -3.583 |
| Axin2         | 0.948  | 8.933  | 2.530  | 0.030 | 0.281 | -3.584 |
| Erap1         | 0.646  | 10.830 | 2.530  | 0.030 | 0.281 | -3.584 |
| Gm10287       | -0.392 | 6.875  | -2.530 | 0.030 | 0.281 | -3.584 |
| Setdb2        | 0.433  | 8.517  | 2.529  | 0.030 | 0.281 | -3.585 |
| Scarb2        | 0.542  | 11.543 | 2.529  | 0.030 | 0.281 | -3.586 |
| Snx13         | -0.249 | 12.017 | -2.529 | 0.030 | 0.281 | -3.586 |
| S1fn5         | 0.369  | 8.953  | 2.528  | 0.030 | 0.281 | -3.586 |
| Ube2d2        | -0.216 | 11.497 | -2.528 | 0.030 | 0.281 | -3.587 |
| 1810058N05Rik | -0.292 | 7.469  | -2.528 | 0.030 | 0.281 | -3.587 |
| Gm14217       | -0.242 | 7.520  | -2.527 | 0.030 | 0.281 | -3.588 |
| Des           | -1.921 | 11.735 | -2.527 | 0.030 | 0.281 | -3.588 |
| AC090887.3    | 0.746  | 7.073  | 2.527  | 0.030 | 0.281 | -3.589 |
| Gm12312       | -0.384 | 6.620  | -2.526 | 0.030 | 0.281 | -3.589 |
| Bend5         | -0.363 | 8.064  | -2.526 | 0.030 | 0.281 | -3.590 |
| Gpatch2       | 0.223  | 9.858  | 2.526  | 0.030 | 0.282 | -3.591 |
| Rpl35a        | -0.275 | 11.458 | -2.525 | 0.030 | 0.282 | -3.591 |
| Uap1          | -0.480 | 12.766 | -2.525 | 0.030 | 0.282 | -3.592 |
| Cd69          | 0.415  | 6.868  | 2.525  | 0.030 | 0.282 | -3.592 |
| Irs1          | -0.704 | 8.151  | -2.523 | 0.030 | 0.282 | -3.594 |

|               |        |        |        |       |       |        |
|---------------|--------|--------|--------|-------|-------|--------|
| Tmco3         | -0.340 | 11.154 | -2.523 | 0.030 | 0.282 | -3.594 |
| 0610010012Rik | -0.568 | 13.619 | -2.523 | 0.030 | 0.282 | -3.595 |
| Fsd11         | 1.177  | 8.964  | 2.523  | 0.030 | 0.282 | -3.595 |
| Cdca2         | 0.402  | 8.646  | 2.522  | 0.030 | 0.282 | -3.596 |
| Tert          | 0.415  | 6.629  | 2.522  | 0.030 | 0.282 | -3.596 |
| Pgm5          | -1.285 | 9.647  | -2.522 | 0.030 | 0.282 | -3.597 |
| Gm15835       | 0.309  | 6.653  | 2.522  | 0.030 | 0.282 | -3.597 |
| Ak1           | -0.563 | 8.453  | -2.521 | 0.030 | 0.282 | -3.597 |
| Sdpr          | -0.653 | 9.974  | -2.521 | 0.030 | 0.282 | -3.597 |
| Chn2          | -0.289 | 10.733 | -2.521 | 0.030 | 0.282 | -3.597 |
| Mtus2         | -0.438 | 7.713  | -2.521 | 0.030 | 0.282 | -3.598 |
| Gkn1          | -2.889 | 17.501 | -2.521 | 0.030 | 0.282 | -3.598 |
| Mfn1          | -0.248 | 10.764 | -2.521 | 0.030 | 0.282 | -3.598 |
| Tmem87a       | -0.420 | 11.727 | -2.520 | 0.030 | 0.282 | -3.599 |
| Lama3         | 1.369  | 11.002 | 2.520  | 0.030 | 0.282 | -3.599 |
| Prim2         | -0.637 | 9.584  | -2.520 | 0.030 | 0.282 | -3.600 |
| R3hcc1        | 0.413  | 9.687  | 2.519  | 0.031 | 0.282 | -3.602 |
| Dmkn          | 1.560  | 9.028  | 2.518  | 0.031 | 0.282 | -3.603 |
| Prkag1        | -0.177 | 10.616 | -2.518 | 0.031 | 0.282 | -3.603 |
| Ncoa1         | 0.208  | 9.775  | 2.517  | 0.031 | 0.282 | -3.603 |
| Cpd           | -0.522 | 14.670 | -2.517 | 0.031 | 0.282 | -3.604 |
| Mtmr7         | -0.436 | 8.372  | -2.517 | 0.031 | 0.282 | -3.604 |
| Zfp445        | 0.260  | 10.693 | 2.517  | 0.031 | 0.282 | -3.604 |
| Gm14639       | -0.218 | 6.460  | -2.517 | 0.031 | 0.282 | -3.604 |
| Jrkl          | 0.153  | 9.702  | 2.517  | 0.031 | 0.282 | -3.605 |
| Pxmp3         | -0.234 | 10.662 | -2.516 | 0.031 | 0.282 | -3.605 |
| A130066N16Rik | 0.230  | 6.969  | 2.516  | 0.031 | 0.282 | -3.606 |
| A030009H04Rik | -0.301 | 7.261  | -2.515 | 0.031 | 0.283 | -3.607 |
| Gps1          | -0.280 | 9.885  | -2.515 | 0.031 | 0.283 | -3.608 |
| Hint1         | -0.499 | 11.978 | -2.515 | 0.031 | 0.283 | -3.608 |
| Wfikkn1       | -0.226 | 6.968  | -2.514 | 0.031 | 0.283 | -3.608 |
| Vamp5         | 0.300  | 8.179  | 2.513  | 0.031 | 0.283 | -3.611 |
| Pex3          | 0.295  | 9.731  | 2.512  | 0.031 | 0.283 | -3.611 |
| Dhx38         | 0.320  | 10.213 | 2.512  | 0.031 | 0.283 | -3.611 |
| Frmd4a        | 0.311  | 8.370  | 2.512  | 0.031 | 0.283 | -3.612 |
| Clqtnf2       | -0.220 | 7.503  | -2.512 | 0.031 | 0.283 | -3.612 |
| Brip1         | 0.372  | 8.437  | 2.511  | 0.031 | 0.284 | -3.613 |
| Id1           | -0.846 | 11.060 | -2.510 | 0.031 | 0.284 | -3.615 |
| Il18          | -0.980 | 11.226 | -2.510 | 0.031 | 0.284 | -3.616 |
| Scarb1        | 0.950  | 9.994  | 2.509  | 0.031 | 0.284 | -3.617 |
| Mecom         | -0.545 | 12.700 | -2.509 | 0.031 | 0.284 | -3.617 |
| Ces2g         | -0.809 | 12.919 | -2.508 | 0.031 | 0.284 | -3.618 |
| Trem1         | 0.694  | 7.030  | 2.508  | 0.031 | 0.284 | -3.619 |
| Foxp4         | -0.465 | 10.631 | -2.507 | 0.031 | 0.285 | -3.620 |
| Vipr2         | -0.384 | 7.924  | -2.507 | 0.031 | 0.285 | -3.620 |
| Ubxn8         | 0.255  | 10.061 | 2.506  | 0.031 | 0.285 | -3.621 |
| Naa30         | -0.206 | 10.271 | -2.506 | 0.031 | 0.285 | -3.622 |
| 1700016K19Rik | -0.497 | 8.068  | -2.506 | 0.031 | 0.285 | -3.622 |
| Gm9923        | 0.231  | 7.611  | 2.506  | 0.031 | 0.285 | -3.622 |
| Chpt1         | -0.679 | 12.283 | -2.506 | 0.031 | 0.285 | -3.622 |



|               |        |        |        |       |       |        |
|---------------|--------|--------|--------|-------|-------|--------|
| Ppp4r2        | -0.250 | 11.650 | -2.505 | 0.031 | 0.285 | -3.622 |
| Cdca5         | 0.358  | 8.219  | 2.505  | 0.031 | 0.285 | -3.623 |
| Phlpp2        | 1.065  | 9.039  | 2.505  | 0.031 | 0.285 | -3.623 |
| Gpn3          | -0.258 | 9.569  | -2.505 | 0.031 | 0.285 | -3.623 |
| Bloc1s2       | -0.211 | 8.768  | -2.504 | 0.031 | 0.285 | -3.625 |
| Mrps17        | -0.277 | 9.870  | -2.504 | 0.031 | 0.285 | -3.625 |
| Arhgap10      | -0.657 | 9.076  | -2.503 | 0.031 | 0.285 | -3.626 |
| D16Ert472e    | 0.388  | 7.612  | 2.503  | 0.031 | 0.285 | -3.626 |
| Actg2         | -1.506 | 11.658 | -2.503 | 0.031 | 0.285 | -3.627 |
| Tyro3         | -0.746 | 9.815  | -2.502 | 0.031 | 0.285 | -3.628 |
| Gpr34         | 0.405  | 7.483  | 2.502  | 0.031 | 0.285 | -3.628 |
| Slc35b1       | -0.547 | 11.758 | -2.501 | 0.031 | 0.285 | -3.629 |
| Stk24         | 0.212  | 11.524 | 2.501  | 0.031 | 0.285 | -3.629 |
| Fam3c         | -0.540 | 12.798 | -2.501 | 0.031 | 0.285 | -3.630 |
| 7530422B04Rik | 0.289  | 6.582  | 2.500  | 0.031 | 0.285 | -3.630 |
| Txnrd1        | 0.622  | 12.605 | 2.500  | 0.031 | 0.285 | -3.630 |
| Il1r2         | 0.543  | 7.464  | 2.500  | 0.032 | 0.285 | -3.631 |
| Ethel         | -0.859 | 10.550 | -2.500 | 0.032 | 0.285 | -3.631 |
| Zfp641        | -0.339 | 7.269  | -2.500 | 0.032 | 0.285 | -3.632 |
| Bag3          | -0.438 | 10.192 | -2.499 | 0.032 | 0.285 | -3.633 |
| Vegfa         | 0.438  | 11.449 | 2.499  | 0.032 | 0.285 | -3.633 |
| Arhgdig       | -0.777 | 7.396  | -2.499 | 0.032 | 0.285 | -3.633 |
| Recq1         | 0.459  | 8.971  | 2.498  | 0.032 | 0.285 | -3.633 |
| Alox15        | 0.551  | 8.057  | 2.498  | 0.032 | 0.285 | -3.634 |
| Ikzf3         | 0.671  | 7.519  | 2.498  | 0.032 | 0.285 | -3.634 |
| Rpa2          | 0.327  | 9.088  | 2.498  | 0.032 | 0.285 | -3.635 |
| Thrsp         | -0.868 | 7.138  | -2.498 | 0.032 | 0.285 | -3.635 |
| 6030422M02Rik | -0.646 | 8.785  | -2.498 | 0.032 | 0.285 | -3.635 |
| 1110014N23Rik | -0.229 | 9.363  | -2.497 | 0.032 | 0.285 | -3.635 |
| Capn8         | -1.921 | 11.199 | -2.497 | 0.032 | 0.285 | -3.635 |
| Evp1          | -0.526 | 10.553 | -2.497 | 0.032 | 0.285 | -3.636 |
| Ttbk1         | -0.420 | 6.695  | -2.496 | 0.032 | 0.285 | -3.636 |
| Pigs          | 0.252  | 9.823  | 2.496  | 0.032 | 0.285 | -3.637 |
| Mmp13         | 2.292  | 9.370  | 2.496  | 0.032 | 0.285 | -3.637 |
| D030047H15Rik | 0.241  | 6.521  | 2.496  | 0.032 | 0.285 | -3.637 |
| Gm20419       | 0.949  | 8.806  | 2.496  | 0.032 | 0.285 | -3.637 |
| AC152451.1    | 0.453  | 7.230  | 2.496  | 0.032 | 0.285 | -3.638 |
| Wee1          | -0.356 | 8.957  | -2.496 | 0.032 | 0.285 | -3.638 |
| Pigf          | -0.437 | 8.683  | -2.496 | 0.032 | 0.285 | -3.638 |
| Gm12316       | -0.345 | 6.770  | -2.495 | 0.032 | 0.285 | -3.638 |
| Egr2          | 0.415  | 7.073  | 2.495  | 0.032 | 0.285 | -3.638 |
| Mtm1          | 0.437  | 10.168 | 2.495  | 0.032 | 0.285 | -3.638 |
| Gm9846        | -0.344 | 11.489 | -2.494 | 0.032 | 0.285 | -3.640 |
| Gm10501       | 0.248  | 6.812  | 2.494  | 0.032 | 0.285 | -3.640 |
| Cltb          | -0.308 | 12.268 | -2.494 | 0.032 | 0.285 | -3.640 |
| Sh3bgr1       | 0.247  | 12.223 | 2.493  | 0.032 | 0.285 | -3.642 |
| Pxdn          | 0.607  | 9.181  | 2.492  | 0.032 | 0.286 | -3.643 |
| Gm15318       | -1.891 | 11.704 | -2.492 | 0.032 | 0.286 | -3.644 |
| Jrk           | -0.413 | 7.822  | -2.491 | 0.032 | 0.286 | -3.645 |
| AL844174.1    | 0.288  | 6.649  | 2.491  | 0.032 | 0.286 | -3.645 |

|               |        |        |        |       |       |        |
|---------------|--------|--------|--------|-------|-------|--------|
| Kcnip4        | -0.483 | 7.194  | -2.490 | 0.032 | 0.286 | -3.646 |
| Rasal2        | 0.270  | 9.413  | 2.490  | 0.032 | 0.286 | -3.646 |
| Ptpn22        | 0.662  | 7.381  | 2.490  | 0.032 | 0.286 | -3.647 |
| Cfd           | -1.413 | 7.058  | -2.489 | 0.032 | 0.286 | -3.648 |
| Gm13619       | -0.256 | 6.511  | -2.489 | 0.032 | 0.286 | -3.648 |
| Gm5403        | 0.291  | 6.841  | 2.489  | 0.032 | 0.286 | -3.648 |
| Bcor11        | 0.363  | 8.889  | 2.489  | 0.032 | 0.286 | -3.648 |
| Slc23a2       | 1.350  | 10.599 | 2.488  | 0.032 | 0.286 | -3.650 |
| Atp8b5        | -0.370 | 6.786  | -2.488 | 0.032 | 0.286 | -3.650 |
| Denr          | -0.397 | 11.904 | -2.488 | 0.032 | 0.287 | -3.650 |
| Cd97          | 0.675  | 10.202 | 2.487  | 0.032 | 0.287 | -3.652 |
| Dars2         | 0.284  | 9.941  | 2.486  | 0.032 | 0.287 | -3.652 |
| Rbm14         | -0.182 | 9.621  | -2.486 | 0.032 | 0.287 | -3.652 |
| Galr2         | -0.378 | 6.928  | -2.486 | 0.032 | 0.287 | -3.653 |
| Ifi2711       | -0.374 | 9.221  | -2.486 | 0.032 | 0.287 | -3.653 |
| Zbtb16        | -1.217 | 7.828  | -2.486 | 0.032 | 0.287 | -3.653 |
| Drap1         | -0.318 | 11.109 | -2.485 | 0.032 | 0.287 | -3.654 |
| 4930570G19Rik | -0.338 | 6.573  | -2.485 | 0.032 | 0.287 | -3.654 |
| Cd3g          | 0.598  | 7.192  | 2.484  | 0.032 | 0.287 | -3.656 |
| Kctd11        | -0.364 | 8.981  | -2.483 | 0.032 | 0.288 | -3.658 |
| Lamtor3       | -0.424 | 10.619 | -2.482 | 0.032 | 0.288 | -3.659 |
| Fabp5         | -0.892 | 12.520 | -2.482 | 0.032 | 0.288 | -3.660 |
| Brp441        | -0.331 | 9.384  | -2.481 | 0.033 | 0.288 | -3.661 |
| Acox1         | -0.301 | 6.816  | -2.481 | 0.033 | 0.288 | -3.661 |
| BC049352      | 0.324  | 6.590  | 2.480  | 0.033 | 0.288 | -3.662 |
| AI987944      | 0.309  | 8.427  | 2.480  | 0.033 | 0.288 | -3.662 |
| Gm13881       | -1.503 | 8.594  | -2.480 | 0.033 | 0.288 | -3.662 |
| Leprotil1     | -0.335 | 10.219 | -2.480 | 0.033 | 0.288 | -3.663 |
| Lrrc14        | -0.248 | 8.491  | -2.479 | 0.033 | 0.288 | -3.664 |
| Zfp821        | -0.332 | 8.646  | -2.479 | 0.033 | 0.288 | -3.664 |
| Adamts15      | -0.567 | 10.446 | -2.479 | 0.033 | 0.288 | -3.664 |
| Pdlim3        | -1.095 | 9.758  | -2.479 | 0.033 | 0.288 | -3.664 |
| Ccdc73        | 0.330  | 7.386  | 2.479  | 0.033 | 0.288 | -3.664 |
| Gm13068       | -0.358 | 7.007  | -2.478 | 0.033 | 0.288 | -3.665 |
| Rab25         | -0.483 | 11.845 | -2.478 | 0.033 | 0.288 | -3.665 |
| Adamts11      | -0.715 | 7.384  | -2.478 | 0.033 | 0.288 | -3.666 |
| Camk1g        | -0.304 | 6.682  | -2.478 | 0.033 | 0.288 | -3.666 |
| Loxl2         | 0.530  | 9.468  | 2.477  | 0.033 | 0.288 | -3.667 |
| Trim46        | -0.384 | 8.354  | -2.477 | 0.033 | 0.288 | -3.667 |
| Foxq1         | -0.552 | 12.284 | -2.476 | 0.033 | 0.289 | -3.668 |
| Stap1         | 0.472  | 7.025  | 2.475  | 0.033 | 0.289 | -3.671 |
| Btla          | 0.638  | 7.196  | 2.474  | 0.033 | 0.289 | -3.672 |
| Gipc2         | -0.747 | 11.978 | -2.474 | 0.033 | 0.289 | -3.672 |
| Gm7204        | 0.354  | 9.639  | 2.474  | 0.033 | 0.289 | -3.672 |
| Tnrc6a        | 0.257  | 11.539 | 2.474  | 0.033 | 0.289 | -3.672 |
| Hps3          | 0.337  | 9.377  | 2.474  | 0.033 | 0.289 | -3.672 |
| Trub2         | 0.347  | 8.714  | 2.474  | 0.033 | 0.289 | -3.672 |
| Slc35f1       | -0.522 | 7.091  | -2.473 | 0.033 | 0.289 | -3.673 |
| Sox10         | -0.478 | 6.994  | -2.472 | 0.033 | 0.289 | -3.674 |
| Utp20         | 0.425  | 9.743  | 2.472  | 0.033 | 0.290 | -3.675 |

|           |        |        |        |       |       |        |
|-----------|--------|--------|--------|-------|-------|--------|
| Gjb3      | 0.705  | 6.957  | 2.472  | 0.033 | 0.290 | -3.676 |
| Gm15506   | 0.343  | 6.714  | 2.471  | 0.033 | 0.290 | -3.677 |
| Fermt3    | 0.377  | 7.860  | 2.470  | 0.033 | 0.290 | -3.677 |
| Anxa2     | 0.684  | 15.061 | 2.470  | 0.033 | 0.290 | -3.677 |
| Spon1     | 0.797  | 9.779  | 2.470  | 0.033 | 0.290 | -3.678 |
| BC065397  | 0.325  | 6.699  | 2.470  | 0.033 | 0.290 | -3.678 |
| Gm13864   | 0.289  | 7.047  | 2.468  | 0.033 | 0.291 | -3.681 |
| Psmb8     | 0.956  | 8.786  | 2.468  | 0.033 | 0.291 | -3.682 |
| Serpina3m | 0.373  | 6.875  | 2.467  | 0.033 | 0.291 | -3.683 |
| Egf17     | 0.339  | 8.669  | 2.466  | 0.033 | 0.291 | -3.684 |
| Slc48a1   | -0.367 | 10.196 | -2.466 | 0.033 | 0.291 | -3.684 |
| Cst3      | -0.512 | 12.880 | -2.466 | 0.033 | 0.291 | -3.684 |
| Gm15564   | -0.627 | 7.243  | -2.464 | 0.034 | 0.292 | -3.688 |
| Acnat1    | 0.585  | 9.787  | 2.464  | 0.034 | 0.292 | -3.688 |
| Cmtm8     | -0.651 | 9.507  | -2.463 | 0.034 | 0.292 | -3.690 |
| Gkn2      | -2.907 | 17.663 | -2.462 | 0.034 | 0.293 | -3.690 |
| Ppm1j     | 1.091  | 7.876  | 2.462  | 0.034 | 0.293 | -3.691 |
| Thg11     | 0.256  | 9.100  | 2.461  | 0.034 | 0.293 | -3.692 |
| Klf15     | -0.593 | 8.512  | -2.460 | 0.034 | 0.293 | -3.693 |
| Mettl13   | -0.222 | 8.785  | -2.460 | 0.034 | 0.293 | -3.694 |
| Gramd1b   | 0.333  | 10.867 | 2.459  | 0.034 | 0.293 | -3.695 |
| Mrpl23    | -0.246 | 8.482  | -2.459 | 0.034 | 0.293 | -3.695 |
| Rcbtb2    | 0.252  | 9.547  | 2.459  | 0.034 | 0.293 | -3.695 |
| Kdm3a     | 0.277  | 10.577 | 2.459  | 0.034 | 0.293 | -3.695 |
| Cfp       | 0.402  | 8.102  | 2.459  | 0.034 | 0.293 | -3.695 |
| Satb2     | 0.382  | 7.230  | 2.458  | 0.034 | 0.293 | -3.696 |
| Myo19     | 0.439  | 8.891  | 2.458  | 0.034 | 0.293 | -3.697 |
| Tbrg1     | -0.228 | 11.708 | -2.457 | 0.034 | 0.294 | -3.698 |
| Lbr       | 0.240  | 10.960 | 2.457  | 0.034 | 0.294 | -3.699 |
| Defa26    | 0.584  | 6.643  | 2.457  | 0.034 | 0.294 | -3.699 |
| Acd       | -0.302 | 8.068  | -2.456 | 0.034 | 0.294 | -3.700 |
| Itpripl2  | -1.234 | 12.015 | -2.456 | 0.034 | 0.294 | -3.701 |
| Ly6g6d    | 0.265  | 7.960  | 2.455  | 0.034 | 0.294 | -3.701 |
| Mgat4a    | 0.512  | 13.090 | 2.455  | 0.034 | 0.294 | -3.702 |
| Plin4     | -1.115 | 7.806  | -2.455 | 0.034 | 0.294 | -3.702 |
| Zfat      | 0.243  | 7.829  | 2.454  | 0.034 | 0.294 | -3.702 |
| Rhoc      | 0.681  | 11.436 | 2.454  | 0.034 | 0.294 | -3.703 |
| Plod3     | 0.286  | 10.135 | 2.454  | 0.034 | 0.294 | -3.703 |
| Hif1a     | 0.355  | 11.678 | 2.453  | 0.034 | 0.294 | -3.704 |
| Tnfsf8    | 0.415  | 6.934  | 2.453  | 0.034 | 0.294 | -3.704 |
| Sh2d5     | 0.531  | 7.030  | 2.453  | 0.034 | 0.294 | -3.705 |
| Rab10     | -0.212 | 12.266 | -2.452 | 0.034 | 0.294 | -3.706 |
| Abca8a    | -0.816 | 8.424  | -2.452 | 0.034 | 0.294 | -3.706 |
| Prkar2a   | 0.418  | 11.405 | 2.452  | 0.034 | 0.295 | -3.707 |
| Gm17131   | 0.341  | 11.411 | 2.451  | 0.034 | 0.295 | -3.707 |
| Rnf150    | 0.862  | 8.431  | 2.450  | 0.034 | 0.295 | -3.709 |
| Tlk1      | -0.212 | 11.507 | -2.450 | 0.034 | 0.295 | -3.709 |
| Cckbr     | -0.642 | 6.962  | -2.450 | 0.034 | 0.295 | -3.710 |
| Slc9a1    | -0.878 | 10.841 | -2.450 | 0.034 | 0.295 | -3.710 |
| Kcnc2     | -0.463 | 7.360  | -2.450 | 0.034 | 0.295 | -3.710 |

|               |        |        |        |       |       |        |
|---------------|--------|--------|--------|-------|-------|--------|
| Fv1           | 0.338  | 8.114  | 2.449  | 0.034 | 0.295 | -3.711 |
| Vcan          | 0.863  | 9.549  | 2.448  | 0.034 | 0.295 | -3.712 |
| Cops6         | -0.246 | 11.178 | -2.448 | 0.034 | 0.295 | -3.713 |
| Atf5          | -0.308 | 9.337  | -2.448 | 0.034 | 0.295 | -3.713 |
| Yipf3         | -0.283 | 10.929 | -2.447 | 0.034 | 0.296 | -3.714 |
| Dock10        | 0.494  | 8.513  | 2.446  | 0.035 | 0.296 | -3.715 |
| Fnta          | -0.319 | 11.211 | -2.446 | 0.035 | 0.296 | -3.715 |
| C130021I20Rik | -0.398 | 6.550  | -2.446 | 0.035 | 0.296 | -3.716 |
| Hoxb6         | -0.281 | 6.947  | -2.445 | 0.035 | 0.296 | -3.716 |
| Hyou1         | -0.658 | 13.020 | -2.445 | 0.035 | 0.296 | -3.717 |
| Gm13387       | 0.245  | 6.946  | 2.445  | 0.035 | 0.296 | -3.717 |
| Prg2          | 0.696  | 7.302  | 2.445  | 0.035 | 0.296 | -3.718 |
| Chmp5         | -0.410 | 12.654 | -2.444 | 0.035 | 0.296 | -3.719 |
| Lrrn4c1       | -0.309 | 7.157  | -2.443 | 0.035 | 0.296 | -3.720 |
| AC114588.1    | 0.226  | 9.595  | 2.443  | 0.035 | 0.296 | -3.720 |
| Slc35a5       | 0.372  | 10.112 | 2.443  | 0.035 | 0.296 | -3.720 |
| Gm15174       | 0.322  | 6.584  | 2.443  | 0.035 | 0.296 | -3.721 |
| Sgsm2         | -0.567 | 9.606  | -2.443 | 0.035 | 0.296 | -3.721 |
| Gm11647       | 0.399  | 7.046  | 2.442  | 0.035 | 0.296 | -3.722 |
| Chchd10       | -0.438 | 9.786  | -2.441 | 0.035 | 0.297 | -3.723 |
| Olf56         | 0.232  | 6.596  | 2.441  | 0.035 | 0.297 | -3.723 |
| Mrpl15        | 0.286  | 10.504 | 2.441  | 0.035 | 0.297 | -3.723 |
| Skint8        | 0.307  | 7.286  | 2.441  | 0.035 | 0.297 | -3.724 |
| 4930455G09Rik | -0.275 | 7.104  | -2.441 | 0.035 | 0.297 | -3.724 |
| Ezh2          | 0.324  | 10.364 | 2.440  | 0.035 | 0.297 | -3.725 |
| Pgap2         | -0.757 | 10.122 | -2.440 | 0.035 | 0.297 | -3.725 |
| Hey2          | -0.318 | 7.174  | -2.439 | 0.035 | 0.297 | -3.726 |
| Cdkn2b        | 0.899  | 8.847  | 2.439  | 0.035 | 0.297 | -3.726 |
| Fam105a       | 0.449  | 8.496  | 2.439  | 0.035 | 0.297 | -3.727 |
| Slc44a2       | -0.803 | 11.283 | -2.439 | 0.035 | 0.297 | -3.727 |
| Toplmt        | 0.343  | 8.628  | 2.439  | 0.035 | 0.297 | -3.727 |
| Gapdh         | 0.493  | 10.587 | 2.438  | 0.035 | 0.297 | -3.728 |
| Fbxw5         | -0.262 | 9.816  | -2.437 | 0.035 | 0.297 | -3.729 |
| Cd2           | 0.395  | 7.092  | 2.435  | 0.035 | 0.298 | -3.732 |
| Gm3500        | 0.146  | 6.456  | 2.435  | 0.035 | 0.298 | -3.733 |
| Dio2          | 1.361  | 8.372  | 2.435  | 0.035 | 0.298 | -3.733 |
| Golph31       | -0.271 | 12.084 | -2.434 | 0.035 | 0.298 | -3.734 |
| P4htm         | -0.281 | 7.126  | -2.434 | 0.035 | 0.299 | -3.735 |
| Zfyve19       | -0.323 | 9.151  | -2.433 | 0.035 | 0.299 | -3.736 |
| Gm1966        | 0.324  | 6.700  | 2.433  | 0.035 | 0.299 | -3.736 |
| Prodh         | 0.450  | 8.433  | 2.433  | 0.035 | 0.299 | -3.737 |
| Gm14851       | 0.793  | 6.779  | 2.432  | 0.035 | 0.299 | -3.737 |
| Defa23        | 0.368  | 6.585  | 2.432  | 0.035 | 0.299 | -3.738 |
| Rabgef1       | -0.510 | 10.603 | -2.431 | 0.035 | 0.299 | -3.739 |
| Rps15a        | -0.266 | 12.052 | -2.431 | 0.035 | 0.299 | -3.740 |
| Zfp599        | 0.227  | 8.121  | 2.431  | 0.035 | 0.299 | -3.740 |
| Ssr4          | -0.344 | 12.005 | -2.430 | 0.036 | 0.300 | -3.741 |
| Gprasp1       | -0.386 | 9.410  | -2.430 | 0.036 | 0.300 | -3.741 |
| Abi3          | 0.445  | 7.071  | 2.429  | 0.036 | 0.300 | -3.742 |
| Ush1g         | 0.928  | 7.106  | 2.429  | 0.036 | 0.300 | -3.743 |

|               |        |        |        |       |       |        |
|---------------|--------|--------|--------|-------|-------|--------|
| 2210407C18Rik | -0.807 | 14.711 | -2.427 | 0.036 | 0.301 | -3.746 |
| Malt1         | 0.432  | 9.775  | 2.426  | 0.036 | 0.301 | -3.746 |
| Pan3          | -0.252 | 11.072 | -2.425 | 0.036 | 0.301 | -3.748 |
| Ppm1l         | -0.432 | 9.666  | -2.425 | 0.036 | 0.301 | -3.748 |
| Ino80         | 0.159  | 10.129 | 2.425  | 0.036 | 0.301 | -3.748 |
| Vamp8         | -0.403 | 12.982 | -2.425 | 0.036 | 0.301 | -3.749 |
| Zc3h4         | 0.320  | 10.444 | 2.424  | 0.036 | 0.301 | -3.750 |
| Dab2ip        | 0.266  | 11.174 | 2.424  | 0.036 | 0.301 | -3.750 |
| Zfp764        | 0.335  | 8.452  | 2.424  | 0.036 | 0.301 | -3.751 |
| Mrpl40        | -0.249 | 9.896  | -2.423 | 0.036 | 0.301 | -3.751 |
| Bmf           | 0.511  | 8.650  | 2.423  | 0.036 | 0.301 | -3.751 |
| AC122322.1    | 0.801  | 7.133  | 2.423  | 0.036 | 0.301 | -3.752 |
| Prpf19        | 0.219  | 10.890 | 2.423  | 0.036 | 0.301 | -3.752 |
| Igkv8-24      | 0.969  | 7.352  | 2.422  | 0.036 | 0.302 | -3.753 |
| Lama1         | 0.893  | 8.219  | 2.422  | 0.036 | 0.302 | -3.754 |
| Pdia6         | -0.744 | 14.971 | -2.422 | 0.036 | 0.302 | -3.754 |
| Fbxl22        | -0.462 | 7.826  | -2.421 | 0.036 | 0.302 | -3.754 |
| Slc9a3        | 1.050  | 9.945  | 2.421  | 0.036 | 0.302 | -3.755 |
| Gm6030        | -0.239 | 6.505  | -2.421 | 0.036 | 0.302 | -3.755 |
| Map3k13       | 0.956  | 9.029  | 2.420  | 0.036 | 0.302 | -3.756 |
| Ngly1         | -0.232 | 11.298 | -2.420 | 0.036 | 0.302 | -3.756 |
| Ddx60         | -0.483 | 9.033  | -2.419 | 0.036 | 0.302 | -3.758 |
| Gvin1         | 0.430  | 6.739  | 2.418  | 0.036 | 0.303 | -3.759 |
| 4921506M07Rik | -0.588 | 8.601  | -2.418 | 0.036 | 0.303 | -3.760 |
| Hjurp         | -0.379 | 10.457 | -2.416 | 0.036 | 0.303 | -3.762 |
| Appl2         | -0.645 | 12.425 | -2.416 | 0.036 | 0.303 | -3.763 |
| Gm13480       | -0.292 | 6.497  | -2.416 | 0.036 | 0.303 | -3.763 |
| Kif3a         | 0.321  | 9.515  | 2.416  | 0.036 | 0.303 | -3.763 |
| Gm6166        | -0.803 | 10.172 | -2.415 | 0.036 | 0.303 | -3.764 |
| Aplf          | -0.313 | 9.387  | -2.415 | 0.036 | 0.303 | -3.764 |
| Tmem8         | -0.542 | 10.918 | -2.415 | 0.036 | 0.303 | -3.765 |
| Ttc16         | 0.492  | 6.785  | 2.414  | 0.036 | 0.303 | -3.765 |
| Pde3b         | -0.675 | 10.471 | -2.414 | 0.036 | 0.304 | -3.766 |
| Flt3          | 0.428  | 7.242  | 2.414  | 0.036 | 0.304 | -3.766 |
| Katna1        | -0.253 | 9.937  | -2.413 | 0.037 | 0.304 | -3.767 |
| Atf4          | -0.273 | 11.925 | -2.413 | 0.037 | 0.304 | -3.767 |
| Prrc1         | -0.256 | 11.178 | -2.413 | 0.037 | 0.304 | -3.767 |
| Stk32a        | -0.481 | 7.103  | -2.412 | 0.037 | 0.304 | -3.768 |
| Niacr1        | 0.571  | 6.838  | 2.412  | 0.037 | 0.304 | -3.769 |
| Sfpq          | -0.269 | 12.344 | -2.412 | 0.037 | 0.304 | -3.769 |
| Kctd5         | 0.566  | 10.351 | 2.412  | 0.037 | 0.304 | -3.769 |
| Tmem169       | 0.310  | 6.693  | 2.412  | 0.037 | 0.304 | -3.769 |
| Lrrn3         | -0.331 | 7.126  | -2.411 | 0.037 | 0.304 | -3.770 |
| Ophn1         | -0.268 | 9.488  | -2.410 | 0.037 | 0.304 | -3.772 |
| Akna          | 0.317  | 8.078  | 2.409  | 0.037 | 0.304 | -3.773 |
| Rpl17         | -0.324 | 13.326 | -2.409 | 0.037 | 0.304 | -3.773 |
| F830045P16Rik | 0.290  | 6.496  | 2.409  | 0.037 | 0.304 | -3.773 |
| Pcdhb22       | 0.287  | 7.357  | 2.409  | 0.037 | 0.305 | -3.774 |
| Snx16         | -0.265 | 8.893  | -2.408 | 0.037 | 0.305 | -3.775 |
| Aqp3          | -1.720 | 11.248 | -2.408 | 0.037 | 0.305 | -3.776 |

|               |        |        |        |       |       |        |
|---------------|--------|--------|--------|-------|-------|--------|
| Dsg3          | 0.415  | 6.628  | 2.407  | 0.037 | 0.305 | -3.776 |
| Gm13502       | 0.395  | 8.191  | 2.407  | 0.037 | 0.305 | -3.776 |
| Inmt          | -0.758 | 6.783  | -2.407 | 0.037 | 0.305 | -3.777 |
| Muc4          | 1.224  | 12.257 | 2.406  | 0.037 | 0.305 | -3.777 |
| Eef2k         | -0.427 | 11.320 | -2.406 | 0.037 | 0.305 | -3.778 |
| Tcf23         | -1.753 | 11.315 | -2.406 | 0.037 | 0.305 | -3.779 |
| Spef1         | -0.514 | 9.031  | -2.405 | 0.037 | 0.305 | -3.779 |
| Nasp          | 0.283  | 11.135 | 2.405  | 0.037 | 0.305 | -3.780 |
| 4930427A07Rik | 0.434  | 8.506  | 2.405  | 0.037 | 0.305 | -3.780 |
| Rom1          | -0.330 | 7.972  | -2.405 | 0.037 | 0.305 | -3.780 |
| Trpv3         | 0.306  | 6.865  | 2.404  | 0.037 | 0.306 | -3.782 |
| Rpl13a-ps1    | 0.237  | 6.853  | 2.404  | 0.037 | 0.306 | -3.782 |
| 2400009B08Rik | -0.303 | 6.654  | -2.403 | 0.037 | 0.306 | -3.782 |
| Mmp19         | 0.753  | 8.604  | 2.403  | 0.037 | 0.306 | -3.783 |
| Apln          | 0.827  | 7.892  | 2.402  | 0.037 | 0.306 | -3.785 |
| Chek1         | 0.263  | 8.533  | 2.400  | 0.037 | 0.307 | -3.787 |
| Gm13509       | 0.229  | 9.831  | 2.400  | 0.037 | 0.307 | -3.787 |
| Galk2         | -0.209 | 10.307 | -2.400 | 0.037 | 0.307 | -3.787 |
| Gm9153        | -0.365 | 6.736  | -2.399 | 0.037 | 0.307 | -3.788 |
| A530072M11Rik | -0.313 | 6.949  | -2.399 | 0.037 | 0.307 | -3.788 |
| Nr2f2         | -0.941 | 10.088 | -2.399 | 0.037 | 0.307 | -3.789 |
| Rpl37         | -0.327 | 11.745 | -2.399 | 0.037 | 0.307 | -3.789 |
| Zfp503        | -0.526 | 9.701  | -2.399 | 0.037 | 0.307 | -3.789 |
| Npr1          | -0.449 | 7.757  | -2.399 | 0.037 | 0.307 | -3.789 |
| Tlr11         | 0.244  | 6.675  | 2.398  | 0.037 | 0.307 | -3.790 |
| Cf12          | -0.399 | 10.628 | -2.398 | 0.038 | 0.307 | -3.791 |
| Invs          | 0.294  | 8.438  | 2.397  | 0.038 | 0.307 | -3.792 |
| Khdcla        | 0.477  | 7.007  | 2.397  | 0.038 | 0.307 | -3.792 |
| Hspbap1       | 0.292  | 8.387  | 2.397  | 0.038 | 0.307 | -3.793 |
| Gm12901       | 0.410  | 6.846  | 2.397  | 0.038 | 0.307 | -3.793 |
| Mrv1l         | -0.695 | 9.253  | -2.396 | 0.038 | 0.307 | -3.793 |
| Gbp8          | 0.514  | 7.413  | 2.396  | 0.038 | 0.307 | -3.793 |
| AL596258.1    | 0.157  | 6.430  | 2.396  | 0.038 | 0.307 | -3.794 |
| Gdf3          | 0.296  | 6.894  | 2.395  | 0.038 | 0.307 | -3.795 |
| 1100001G20Rik | 0.304  | 6.503  | 2.395  | 0.038 | 0.307 | -3.795 |
| Tpt1-ps6      | -0.296 | 7.414  | -2.395 | 0.038 | 0.307 | -3.796 |
| Evc           | -0.269 | 7.918  | -2.394 | 0.038 | 0.307 | -3.796 |
| Trim12        | 0.486  | 6.623  | 2.394  | 0.038 | 0.307 | -3.796 |
| Krcc1         | -0.291 | 12.552 | -2.393 | 0.038 | 0.308 | -3.798 |
| Gm13479       | -0.234 | 6.565  | -2.392 | 0.038 | 0.309 | -3.800 |
| 2310014L17Rik | -0.416 | 7.151  | -2.391 | 0.038 | 0.309 | -3.801 |
| Gimap7        | 0.601  | 7.128  | 2.391  | 0.038 | 0.309 | -3.801 |
| Trip11        | -0.214 | 11.662 | -2.391 | 0.038 | 0.309 | -3.802 |
| Atp2b1        | 0.909  | 14.013 | 2.391  | 0.038 | 0.309 | -3.802 |
| Psmbl         | -0.216 | 11.741 | -2.390 | 0.038 | 0.309 | -3.803 |
| Rnf122        | 0.287  | 7.776  | 2.390  | 0.038 | 0.309 | -3.803 |
| Fryl          | 0.219  | 11.333 | 2.390  | 0.038 | 0.309 | -3.803 |
| Hmgal         | 0.390  | 8.789  | 2.390  | 0.038 | 0.309 | -3.803 |
| Dcaf15        | 0.261  | 9.147  | 2.389  | 0.038 | 0.309 | -3.804 |
| Rpl13         | -0.295 | 11.921 | -2.389 | 0.038 | 0.309 | -3.805 |

|               |        |        |        |       |       |        |
|---------------|--------|--------|--------|-------|-------|--------|
| Mafk          | -0.363 | 10.936 | -2.388 | 0.038 | 0.309 | -3.805 |
| Stk11         | -0.221 | 11.304 | -2.388 | 0.038 | 0.309 | -3.807 |
| Nqo1          | -1.933 | 13.247 | -2.386 | 0.038 | 0.310 | -3.810 |
| Cdh19         | -0.641 | 7.167  | -2.385 | 0.038 | 0.310 | -3.811 |
| Ptprk         | -0.264 | 11.889 | -2.385 | 0.038 | 0.310 | -3.811 |
| Stx7          | -0.208 | 11.980 | -2.385 | 0.038 | 0.310 | -3.811 |
| Colec10       | -1.347 | 8.962  | -2.385 | 0.038 | 0.310 | -3.812 |
| Atad5         | 0.327  | 8.891  | 2.385  | 0.038 | 0.310 | -3.812 |
| Icam5         | 0.264  | 6.537  | 2.384  | 0.038 | 0.310 | -3.812 |
| Csnk1e        | 0.271  | 9.394  | 2.383  | 0.038 | 0.311 | -3.813 |
| Tfcp2l1       | -0.841 | 12.846 | -2.383 | 0.038 | 0.311 | -3.813 |
| Clcn5         | 0.341  | 10.956 | 2.383  | 0.038 | 0.311 | -3.814 |
| Gars          | -0.231 | 11.733 | -2.383 | 0.038 | 0.311 | -3.814 |
| Setd4         | -0.467 | 8.398  | -2.383 | 0.038 | 0.311 | -3.815 |
| Nt5c1b        | 0.257  | 6.480  | 2.382  | 0.039 | 0.311 | -3.815 |
| E330016A19Rik | 0.376  | 7.835  | 2.382  | 0.039 | 0.311 | -3.816 |
| Adamts20      | -0.242 | 6.472  | -2.382 | 0.039 | 0.311 | -3.816 |
| Lrtm1         | 0.264  | 6.483  | 2.382  | 0.039 | 0.311 | -3.816 |
| Asb6          | -0.192 | 8.816  | -2.381 | 0.039 | 0.311 | -3.817 |
| Unc5c1        | 1.016  | 8.958  | 2.381  | 0.039 | 0.311 | -3.817 |
| Igfbp6        | -0.515 | 7.786  | -2.381 | 0.039 | 0.311 | -3.817 |
| Mfap1a        | -0.182 | 9.461  | -2.380 | 0.039 | 0.311 | -3.818 |
| Tsc22d3       | -0.763 | 10.673 | -2.380 | 0.039 | 0.311 | -3.819 |
| Cd80          | 0.365  | 6.867  | 2.380  | 0.039 | 0.311 | -3.819 |
| Foxp2         | -0.603 | 8.807  | -2.379 | 0.039 | 0.311 | -3.821 |
| Chmp2a        | -0.347 | 12.344 | -2.378 | 0.039 | 0.312 | -3.822 |
| Inhba         | 1.232  | 8.522  | 2.378  | 0.039 | 0.312 | -3.822 |
| Gm11428       | 0.360  | 7.304  | 2.377  | 0.039 | 0.312 | -3.823 |
| 0610007P22Rik | -0.210 | 8.862  | -2.377 | 0.039 | 0.312 | -3.824 |
| A330021E22Rik | -1.158 | 9.157  | -2.376 | 0.039 | 0.312 | -3.824 |
| Ccl27a        | -0.296 | 7.301  | -2.376 | 0.039 | 0.312 | -3.826 |
| Arl4d         | -0.961 | 7.939  | -2.375 | 0.039 | 0.312 | -3.826 |
| Asf1b         | 0.364  | 8.706  | 2.375  | 0.039 | 0.312 | -3.826 |
| Duxbl1        | -0.259 | 6.481  | -2.375 | 0.039 | 0.313 | -3.827 |
| Rims2         | 0.420  | 7.175  | 2.373  | 0.039 | 0.313 | -3.829 |
| Emr4          | 0.377  | 7.161  | 2.373  | 0.039 | 0.313 | -3.829 |
| Sdf2l1        | -0.975 | 12.013 | -2.373 | 0.039 | 0.313 | -3.830 |
| Asz1          | 1.646  | 8.601  | 2.373  | 0.039 | 0.313 | -3.830 |
| Golph3        | -0.333 | 13.111 | -2.373 | 0.039 | 0.313 | -3.830 |
| Vsig2         | -1.108 | 12.665 | -2.372 | 0.039 | 0.313 | -3.831 |
| Mmp16         | -0.351 | 6.957  | -2.372 | 0.039 | 0.313 | -3.831 |
| Scarna17      | 0.266  | 6.571  | 2.372  | 0.039 | 0.313 | -3.831 |
| Scarna2       | -0.418 | 7.520  | -2.372 | 0.039 | 0.313 | -3.831 |
| AC160985.3    | 0.560  | 6.880  | 2.372  | 0.039 | 0.313 | -3.831 |
| Fam117a       | -0.662 | 7.648  | -2.371 | 0.039 | 0.313 | -3.832 |
| Gm16602       | 0.251  | 6.477  | 2.371  | 0.039 | 0.313 | -3.832 |
| Gab2          | 0.357  | 9.049  | 2.371  | 0.039 | 0.313 | -3.832 |
| 4933403F05Rik | 0.281  | 11.280 | 2.370  | 0.039 | 0.313 | -3.833 |
| Tlr1          | 0.520  | 8.093  | 2.370  | 0.039 | 0.313 | -3.834 |
| Pja2          | -0.315 | 12.243 | -2.370 | 0.039 | 0.313 | -3.835 |

|               |        |        |        |       |       |        |
|---------------|--------|--------|--------|-------|-------|--------|
| Csf2ra        | 0.443  | 8.108  | 2.370  | 0.039 | 0.313 | -3.835 |
| Slitrk2       | -0.319 | 6.612  | -2.370 | 0.039 | 0.313 | -3.835 |
| Peli2         | -0.383 | 8.318  | -2.369 | 0.039 | 0.313 | -3.835 |
| Mtf1          | 0.219  | 9.551  | 2.369  | 0.039 | 0.313 | -3.836 |
| Gpr112        | 0.820  | 7.007  | 2.368  | 0.039 | 0.313 | -3.837 |
| CK137956      | 0.179  | 6.472  | 2.368  | 0.039 | 0.313 | -3.837 |
| Gm14206       | 0.240  | 6.542  | 2.368  | 0.039 | 0.313 | -3.837 |
| Rap1gap       | -0.647 | 11.685 | -2.368 | 0.039 | 0.313 | -3.837 |
| Arhgef9       | -0.488 | 8.197  | -2.368 | 0.039 | 0.313 | -3.838 |
| Tnfrsf11a     | 0.827  | 9.691  | 2.367  | 0.040 | 0.313 | -3.838 |
| Nfix          | -0.617 | 10.586 | -2.367 | 0.040 | 0.313 | -3.838 |
| Cope          | -0.240 | 11.663 | -2.367 | 0.040 | 0.313 | -3.839 |
| Adam11        | -0.428 | 7.337  | -2.367 | 0.040 | 0.313 | -3.839 |
| Cd63          | -0.291 | 12.722 | -2.367 | 0.040 | 0.313 | -3.839 |
| Tctex1d2      | -0.463 | 8.385  | -2.367 | 0.040 | 0.313 | -3.839 |
| Gusb          | 0.386  | 10.313 | 2.366  | 0.040 | 0.314 | -3.841 |
| Xiap          | 0.336  | 11.997 | 2.366  | 0.040 | 0.314 | -3.841 |
| Taf1c         | -0.195 | 8.221  | -2.366 | 0.040 | 0.314 | -3.841 |
| 2810428I15Rik | -0.312 | 9.549  | -2.365 | 0.040 | 0.314 | -3.841 |
| Atp6v0a2      | 0.736  | 10.894 | 2.365  | 0.040 | 0.314 | -3.842 |
| Gbas          | -0.371 | 10.972 | -2.364 | 0.040 | 0.314 | -3.843 |
| Dppa5a        | -0.561 | 7.038  | -2.364 | 0.040 | 0.314 | -3.843 |
| Gm10775       | -0.261 | 6.649  | -2.364 | 0.040 | 0.314 | -3.844 |
| Ryr2          | -0.805 | 8.001  | -2.363 | 0.040 | 0.314 | -3.846 |
| Nos2          | 0.445  | 6.790  | 2.362  | 0.040 | 0.314 | -3.846 |
| Cox7a2        | -0.340 | 11.715 | -2.362 | 0.040 | 0.315 | -3.847 |
| Josd1         | -0.243 | 9.754  | -2.362 | 0.040 | 0.315 | -3.847 |
| 1700088E04Rik | -0.298 | 6.902  | -2.361 | 0.040 | 0.315 | -3.848 |
| Cops4         | -0.239 | 10.710 | -2.361 | 0.040 | 0.315 | -3.848 |
| St3gall       | 0.288  | 8.647  | 2.360  | 0.040 | 0.315 | -3.849 |
| Stfa211       | 0.305  | 6.580  | 2.359  | 0.040 | 0.316 | -3.852 |
| 2210009G21Rik | 0.282  | 8.984  | 2.358  | 0.040 | 0.316 | -3.852 |
| Gm5535        | 0.258  | 6.543  | 2.358  | 0.040 | 0.316 | -3.853 |
| Dpcr1         | -1.842 | 16.522 | -2.358 | 0.040 | 0.316 | -3.853 |
| Gm5940        | -0.224 | 6.744  | -2.358 | 0.040 | 0.316 | -3.853 |
| 1500015010Rik | 0.240  | 6.471  | 2.357  | 0.040 | 0.316 | -3.854 |
| Ap3s1         | -0.265 | 11.296 | -2.357 | 0.040 | 0.316 | -3.854 |
| Gchfr         | 0.480  | 6.772  | 2.357  | 0.040 | 0.316 | -3.855 |
| Rpl7a-ps5     | -0.386 | 7.664  | -2.356 | 0.040 | 0.316 | -3.855 |
| Atp5g1        | -0.486 | 11.059 | -2.356 | 0.040 | 0.316 | -3.855 |
| Trappc6a      | -0.427 | 9.293  | -2.355 | 0.040 | 0.316 | -3.857 |
| Aldh3b1       | 0.893  | 8.077  | 2.355  | 0.040 | 0.316 | -3.857 |
| Rpl31-ps4     | -0.268 | 6.519  | -2.355 | 0.040 | 0.316 | -3.858 |
| 9030224M15Rik | -0.398 | 7.044  | -2.354 | 0.040 | 0.316 | -3.859 |
| Slc27a6       | -0.757 | 8.010  | -2.354 | 0.040 | 0.316 | -3.859 |
| Hvcn1         | 0.357  | 7.917  | 2.354  | 0.040 | 0.316 | -3.859 |
| Trnp1         | -0.567 | 7.132  | -2.354 | 0.040 | 0.316 | -3.859 |
| Ppm1f         | 0.270  | 9.020  | 2.354  | 0.040 | 0.317 | -3.859 |
| Fcrls         | 0.462  | 8.031  | 2.353  | 0.040 | 0.317 | -3.861 |
| Luc71         | -0.179 | 10.685 | -2.353 | 0.041 | 0.317 | -3.861 |



|               |        |        |        |       |       |        |
|---------------|--------|--------|--------|-------|-------|--------|
| Lsp1          | 0.290  | 9.662  | 2.352  | 0.041 | 0.317 | -3.863 |
| Mycn          | 0.555  | 7.635  | 2.351  | 0.041 | 0.318 | -3.864 |
| Lsm14b        | -0.363 | 9.934  | -2.350 | 0.041 | 0.318 | -3.865 |
| Ccdc64        | -0.797 | 9.458  | -2.350 | 0.041 | 0.318 | -3.865 |
| Pfkfb3        | 0.691  | 9.172  | 2.350  | 0.041 | 0.318 | -3.865 |
| 8430436N08Rik | -0.239 | 6.471  | -2.349 | 0.041 | 0.318 | -3.866 |
| Gm11979       | -0.169 | 6.436  | -2.349 | 0.041 | 0.318 | -3.866 |
| Adh7          | -2.540 | 10.179 | -2.349 | 0.041 | 0.318 | -3.867 |
| Pde8a         | -0.656 | 9.833  | -2.348 | 0.041 | 0.318 | -3.869 |
| Aagab         | -0.239 | 10.524 | -2.348 | 0.041 | 0.318 | -3.869 |
| AB124611      | -0.485 | 8.052  | -2.347 | 0.041 | 0.318 | -3.869 |
| Lmtk2         | 0.285  | 10.938 | 2.347  | 0.041 | 0.318 | -3.869 |
| Cap2          | -0.991 | 8.077  | -2.347 | 0.041 | 0.319 | -3.870 |
| Dnm11         | 0.232  | 11.781 | 2.346  | 0.041 | 0.319 | -3.871 |
| Gm7964        | 0.211  | 10.738 | 2.346  | 0.041 | 0.319 | -3.872 |
| Ireb2         | 0.567  | 11.806 | 2.346  | 0.041 | 0.319 | -3.872 |
| Plat          | 0.690  | 9.059  | 2.345  | 0.041 | 0.319 | -3.872 |
| Nfe212        | -0.349 | 13.035 | -2.345 | 0.041 | 0.319 | -3.873 |
| Trmt12        | -0.279 | 8.869  | -2.345 | 0.041 | 0.319 | -3.873 |
| Akt2          | -0.217 | 10.671 | -2.345 | 0.041 | 0.319 | -3.873 |
| Gm3571        | -0.349 | 8.209  | -2.345 | 0.041 | 0.319 | -3.873 |
| Sgcd          | -0.284 | 7.570  | -2.345 | 0.041 | 0.319 | -3.873 |
| Gm12146       | 0.287  | 6.567  | 2.345  | 0.041 | 0.319 | -3.873 |
| Fam124a       | 0.719  | 8.463  | 2.344  | 0.041 | 0.319 | -3.874 |
| Gm4070        | 0.239  | 7.108  | 2.344  | 0.041 | 0.319 | -3.874 |
| Rep15         | -1.602 | 11.696 | -2.344 | 0.041 | 0.319 | -3.875 |
| Naglu         | -0.391 | 8.971  | -2.343 | 0.041 | 0.319 | -3.876 |
| Ring1         | -0.269 | 8.657  | -2.343 | 0.041 | 0.319 | -3.876 |
| Fam64a        | 0.304  | 7.456  | 2.343  | 0.041 | 0.319 | -3.877 |
| Bcl2l15       | 0.826  | 7.161  | 2.341  | 0.041 | 0.320 | -3.879 |
| Rims1         | -1.140 | 8.427  | -2.341 | 0.041 | 0.320 | -3.879 |
| Rnase4        | -0.629 | 12.476 | -2.341 | 0.041 | 0.320 | -3.880 |
| Kank2         | -0.522 | 9.167  | -2.340 | 0.041 | 0.320 | -3.880 |
| Uqcr10        | -0.473 | 11.942 | -2.340 | 0.041 | 0.320 | -3.880 |
| Mast2         | 0.352  | 10.645 | 2.339  | 0.041 | 0.320 | -3.882 |
| Pip4k2a       | 0.404  | 9.258  | 2.339  | 0.041 | 0.320 | -3.882 |
| Sh3kbp1       | 0.746  | 11.231 | 2.339  | 0.041 | 0.320 | -3.882 |
| Ighj1         | 0.313  | 6.593  | 2.339  | 0.041 | 0.320 | -3.883 |
| Tcp1l11       | -0.221 | 7.214  | -2.339 | 0.041 | 0.320 | -3.883 |
| Sowahb        | 0.486  | 9.594  | 2.338  | 0.041 | 0.320 | -3.883 |
| Gm6264        | -0.232 | 7.360  | -2.338 | 0.042 | 0.320 | -3.884 |
| Polr3k        | -0.322 | 11.113 | -2.337 | 0.042 | 0.320 | -3.885 |
| Fam83b        | 0.516  | 10.517 | 2.337  | 0.042 | 0.320 | -3.885 |
| B930094E09Rik | 0.270  | 6.634  | 2.337  | 0.042 | 0.320 | -3.885 |
| Dis3l2        | 0.242  | 9.304  | 2.337  | 0.042 | 0.320 | -3.885 |
| Oaz1          | -0.270 | 12.239 | -2.337 | 0.042 | 0.320 | -3.886 |
| Kynu          | 0.297  | 7.120  | 2.336  | 0.042 | 0.320 | -3.886 |
| Oasl2         | 0.433  | 8.720  | 2.335  | 0.042 | 0.321 | -3.888 |
| Zfhx3         | -0.291 | 9.369  | -2.334 | 0.042 | 0.321 | -3.889 |
| Zfp668        | 0.245  | 8.107  | 2.334  | 0.042 | 0.321 | -3.890 |

|               |        |        |        |       |       |        |
|---------------|--------|--------|--------|-------|-------|--------|
| Dynl11        | -0.586 | 11.862 | -2.334 | 0.042 | 0.321 | -3.891 |
| 1810032008Rik | 0.259  | 7.813  | 2.333  | 0.042 | 0.321 | -3.891 |
| Zfp92         | 0.325  | 7.084  | 2.332  | 0.042 | 0.322 | -3.893 |
| Gm8129        | -0.246 | 8.606  | -2.332 | 0.042 | 0.322 | -3.894 |
| Usp24         | -0.391 | 11.876 | -2.331 | 0.042 | 0.322 | -3.894 |
| Ssbp2         | -0.346 | 8.550  | -2.331 | 0.042 | 0.322 | -3.894 |
| Mia2          | 0.788  | 10.401 | 2.331  | 0.042 | 0.322 | -3.895 |
| Serpina3f     | 0.579  | 7.081  | 2.330  | 0.042 | 0.322 | -3.896 |
| 9930104L06Rik | -0.296 | 8.644  | -2.330 | 0.042 | 0.322 | -3.896 |
| Mad211bp      | -0.297 | 9.181  | -2.330 | 0.042 | 0.322 | -3.896 |
| C630004H02Rik | -0.616 | 11.407 | -2.330 | 0.042 | 0.322 | -3.897 |
| Idh2          | -0.545 | 11.043 | -2.329 | 0.042 | 0.322 | -3.897 |
| Pcdhb14       | 0.359  | 7.529  | 2.329  | 0.042 | 0.322 | -3.897 |
| Tnpo2         | -0.212 | 10.605 | -2.329 | 0.042 | 0.322 | -3.898 |
| Mtcp1         | 0.234  | 8.872  | 2.329  | 0.042 | 0.322 | -3.898 |
| Gm11605       | -0.261 | 7.097  | -2.329 | 0.042 | 0.323 | -3.898 |
| Zfp319        | 0.292  | 8.282  | 2.328  | 0.042 | 0.323 | -3.899 |
| Ppl           | 0.481  | 9.713  | 2.328  | 0.042 | 0.323 | -3.899 |
| Gabbr2        | 0.282  | 6.636  | 2.328  | 0.042 | 0.323 | -3.900 |
| Cblc          | 0.243  | 9.659  | 2.327  | 0.042 | 0.323 | -3.901 |
| Eno2          | -0.496 | 7.713  | -2.326 | 0.042 | 0.323 | -3.902 |
| Hs2st1        | 0.415  | 10.159 | 2.326  | 0.042 | 0.323 | -3.902 |
| Mrps24        | -0.474 | 9.900  | -2.326 | 0.042 | 0.323 | -3.902 |
| Lgals4        | 0.802  | 15.129 | 2.326  | 0.042 | 0.323 | -3.902 |
| Trim31        | 1.911  | 9.265  | 2.326  | 0.042 | 0.323 | -3.903 |
| Grpel1        | -0.427 | 11.066 | -2.326 | 0.042 | 0.323 | -3.903 |
| Cnksr1        | -0.292 | 9.667  | -2.326 | 0.042 | 0.323 | -3.903 |
| Rasa3         | 0.500  | 8.970  | 2.326  | 0.042 | 0.323 | -3.903 |
| Nr2e3         | 0.438  | 6.571  | 2.325  | 0.042 | 0.323 | -3.903 |
| Trim56        | 0.286  | 10.801 | 2.325  | 0.042 | 0.323 | -3.904 |
| Bet1          | -0.317 | 10.574 | -2.325 | 0.042 | 0.323 | -3.904 |
| Ptgr1         | -1.427 | 14.274 | -2.325 | 0.042 | 0.323 | -3.905 |
| Pvr           | 0.425  | 9.205  | 2.324  | 0.042 | 0.323 | -3.905 |
| Slc18a2       | -0.373 | 7.953  | -2.324 | 0.042 | 0.323 | -3.905 |
| Spacal        | 0.231  | 6.467  | 2.324  | 0.043 | 0.323 | -3.906 |
| Pik3cg        | 0.320  | 8.678  | 2.323  | 0.043 | 0.323 | -3.907 |
| Gm10080       | -0.427 | 8.493  | -2.323 | 0.043 | 0.323 | -3.907 |
| Pirt          | -1.031 | 9.018  | -2.323 | 0.043 | 0.323 | -3.907 |
| Pcdh17        | 0.284  | 7.945  | 2.323  | 0.043 | 0.323 | -3.907 |
| Rnf144a       | 0.342  | 7.561  | 2.323  | 0.043 | 0.323 | -3.908 |
| Rpl10         | -0.285 | 13.279 | -2.322 | 0.043 | 0.323 | -3.908 |
| Ppp2r5a       | -0.298 | 11.184 | -2.322 | 0.043 | 0.323 | -3.909 |
| Gm12138       | -0.281 | 7.075  | -2.322 | 0.043 | 0.323 | -3.909 |
| Lrig2         | 0.251  | 9.428  | 2.321  | 0.043 | 0.323 | -3.910 |
| 2310007B03Rik | 0.633  | 6.893  | 2.321  | 0.043 | 0.323 | -3.910 |
| Vsig1         | -1.958 | 13.402 | -2.321 | 0.043 | 0.323 | -3.910 |
| Tmem37        | 0.746  | 7.382  | 2.321  | 0.043 | 0.323 | -3.910 |
| Scn3b         | -0.285 | 6.787  | -2.321 | 0.043 | 0.323 | -3.910 |
| Baz2b         | 0.314  | 10.900 | 2.321  | 0.043 | 0.323 | -3.910 |
| Gm9493        | -0.314 | 7.549  | -2.321 | 0.043 | 0.323 | -3.911 |

|               |        |        |        |       |       |        |
|---------------|--------|--------|--------|-------|-------|--------|
| Sqrd1         | -0.807 | 12.665 | -2.320 | 0.043 | 0.323 | -3.912 |
| Ndufb4        | -0.342 | 9.569  | -2.320 | 0.043 | 0.323 | -3.912 |
| Gdi1          | -0.316 | 11.531 | -2.320 | 0.043 | 0.323 | -3.912 |
| Me1           | -0.677 | 13.619 | -2.319 | 0.043 | 0.323 | -3.913 |
| 1700040I03Rik | -0.249 | 8.311  | -2.319 | 0.043 | 0.323 | -3.913 |
| 4930528F23Rik | 0.254  | 6.478  | 2.319  | 0.043 | 0.323 | -3.914 |
| Parp14        | 0.851  | 10.309 | 2.319  | 0.043 | 0.323 | -3.914 |
| Trib1         | 0.506  | 10.371 | 2.317  | 0.043 | 0.324 | -3.916 |
| Sult6b1       | 0.246  | 6.684  | 2.317  | 0.043 | 0.324 | -3.917 |
| Gm10177       | -0.209 | 8.765  | -2.317 | 0.043 | 0.324 | -3.917 |
| Pcdhb4        | 0.476  | 7.309  | 2.316  | 0.043 | 0.324 | -3.917 |
| Tlr8          | 0.337  | 7.374  | 2.316  | 0.043 | 0.324 | -3.918 |
| Gm13034       | 0.329  | 7.255  | 2.316  | 0.043 | 0.324 | -3.918 |
| Gm17023       | -0.268 | 6.640  | -2.316 | 0.043 | 0.324 | -3.918 |
| Gad2          | 0.582  | 7.544  | 2.316  | 0.043 | 0.324 | -3.918 |
| Ltf           | 2.563  | 10.102 | 2.315  | 0.043 | 0.324 | -3.919 |
| Nrtn          | -0.266 | 7.220  | -2.315 | 0.043 | 0.324 | -3.919 |
| Tpbg          | 0.301  | 7.249  | 2.315  | 0.043 | 0.324 | -3.919 |
| Fam187b       | 0.276  | 7.587  | 2.315  | 0.043 | 0.324 | -3.920 |
| Cep72         | 0.580  | 8.270  | 2.315  | 0.043 | 0.324 | -3.920 |
| Tymp          | 1.353  | 7.746  | 2.315  | 0.043 | 0.324 | -3.920 |
| Cacna1c       | -0.582 | 7.927  | -2.315 | 0.043 | 0.324 | -3.920 |
| Gpr88         | -0.301 | 6.734  | -2.315 | 0.043 | 0.324 | -3.920 |
| Dpy1914       | 0.216  | 10.269 | 2.313  | 0.043 | 0.324 | -3.922 |
| Six5          | -0.432 | 8.030  | -2.313 | 0.043 | 0.324 | -3.922 |
| Dnahc2        | 0.345  | 6.962  | 2.313  | 0.043 | 0.324 | -3.923 |
| Nfatc4        | -0.392 | 8.050  | -2.313 | 0.043 | 0.324 | -3.923 |
| Gm20708       | -0.238 | 6.549  | -2.312 | 0.043 | 0.324 | -3.923 |
| Scn1a         | -0.290 | 6.496  | -2.312 | 0.043 | 0.324 | -3.923 |
| Ldlrad3       | -0.404 | 8.637  | -2.312 | 0.043 | 0.324 | -3.923 |
| Rps11         | -0.203 | 12.595 | -2.312 | 0.043 | 0.324 | -3.924 |
| Rundc3b       | 0.565  | 7.671  | 2.311  | 0.043 | 0.325 | -3.925 |
| Speg          | -0.642 | 8.098  | -2.311 | 0.043 | 0.325 | -3.926 |
| Gm6682        | 0.233  | 6.811  | 2.311  | 0.043 | 0.325 | -3.926 |
| Isl1          | -0.628 | 8.262  | -2.310 | 0.044 | 0.325 | -3.926 |
| Brcc3         | -0.214 | 10.517 | -2.310 | 0.044 | 0.325 | -3.927 |
| Eltf1         | 0.526  | 8.804  | 2.310  | 0.044 | 0.325 | -3.927 |
| Lhfp15        | -0.239 | 6.471  | -2.310 | 0.044 | 0.325 | -3.927 |
| Ptpn4         | 0.334  | 8.856  | 2.310  | 0.044 | 0.325 | -3.927 |
| AC073565.3    | 0.288  | 6.629  | 2.309  | 0.044 | 0.325 | -3.929 |
| Cdkn3         | -0.301 | 8.254  | -2.309 | 0.044 | 0.325 | -3.929 |
| Prpf18        | 0.176  | 10.870 | 2.308  | 0.044 | 0.325 | -3.930 |
| Ptch1         | 0.424  | 9.144  | 2.308  | 0.044 | 0.325 | -3.930 |
| Gmpr          | -0.452 | 7.428  | -2.308 | 0.044 | 0.325 | -3.930 |
| Bex1          | -0.450 | 6.847  | -2.308 | 0.044 | 0.325 | -3.931 |
| Foxj2         | -0.440 | 9.480  | -2.308 | 0.044 | 0.325 | -3.931 |
| Gm15774       | -0.293 | 7.053  | -2.307 | 0.044 | 0.325 | -3.932 |
| Lama5         | 0.535  | 9.635  | 2.307  | 0.044 | 0.325 | -3.932 |
| Gabrb2        | -0.514 | 6.609  | -2.307 | 0.044 | 0.325 | -3.932 |
| Tmem57        | -0.434 | 10.980 | -2.307 | 0.044 | 0.325 | -3.932 |

|               |        |        |        |       |       |        |
|---------------|--------|--------|--------|-------|-------|--------|
| Insig1        | 0.581  | 13.083 | 2.307  | 0.044 | 0.325 | -3.932 |
| Coll18a1      | 1.027  | 11.849 | 2.306  | 0.044 | 0.325 | -3.933 |
| Trim65        | -0.360 | 9.006  | -2.306 | 0.044 | 0.325 | -3.933 |
| Tube4         | 0.227  | 9.517  | 2.306  | 0.044 | 0.325 | -3.933 |
| Cyp2c44       | -1.250 | 9.159  | -2.306 | 0.044 | 0.325 | -3.934 |
| Ttf2          | 0.342  | 8.769  | 2.305  | 0.044 | 0.325 | -3.934 |
| Scrn1         | -0.465 | 7.706  | -2.305 | 0.044 | 0.325 | -3.935 |
| Escr          | 0.673  | 8.629  | 2.305  | 0.044 | 0.325 | -3.935 |
| Mxl           | -0.464 | 8.535  | -2.305 | 0.044 | 0.325 | -3.936 |
| Poc5          | -0.325 | 9.475  | -2.303 | 0.044 | 0.326 | -3.937 |
| Tnfrsf10      | 0.560  | 8.582  | 2.303  | 0.044 | 0.326 | -3.938 |
| Tnfr1         | -0.933 | 11.352 | -2.303 | 0.044 | 0.326 | -3.938 |
| Amdhd2        | 0.539  | 8.588  | 2.302  | 0.044 | 0.326 | -3.940 |
| Zfp111        | -0.318 | 9.071  | -2.302 | 0.044 | 0.326 | -3.940 |
| Uaca          | 0.430  | 11.237 | 2.302  | 0.044 | 0.326 | -3.940 |
| AL670114.1    | 0.766  | 7.499  | 2.301  | 0.044 | 0.327 | -3.941 |
| Plekha2       | 0.323  | 11.066 | 2.301  | 0.044 | 0.327 | -3.942 |
| Erf           | 0.224  | 9.727  | 2.300  | 0.044 | 0.327 | -3.942 |
| AC147162.1    | 0.270  | 6.486  | 2.300  | 0.044 | 0.327 | -3.943 |
| Foxn2         | -0.244 | 10.334 | -2.299 | 0.044 | 0.327 | -3.944 |
| Cttnb11       | 0.188  | 10.005 | 2.299  | 0.044 | 0.327 | -3.945 |
| AC120404.3    | 0.862  | 7.368  | 2.298  | 0.044 | 0.327 | -3.945 |
| Eme1          | 0.208  | 7.559  | 2.298  | 0.044 | 0.327 | -3.945 |
| Ccdc66        | 0.198  | 9.166  | 2.298  | 0.044 | 0.327 | -3.946 |
| Trim58        | -0.397 | 7.043  | -2.298 | 0.044 | 0.327 | -3.946 |
| Gripap1       | -0.213 | 10.212 | -2.298 | 0.044 | 0.327 | -3.946 |
| Gm12482       | 0.246  | 7.242  | 2.298  | 0.044 | 0.327 | -3.946 |
| 2700078E11Rik | 0.230  | 11.024 | 2.298  | 0.044 | 0.327 | -3.946 |
| Il20rb        | 0.276  | 7.512  | 2.297  | 0.045 | 0.327 | -3.947 |
| Cd38          | 1.282  | 9.901  | 2.297  | 0.045 | 0.327 | -3.947 |
| Gm13420       | -0.363 | 6.857  | -2.297 | 0.045 | 0.327 | -3.947 |
| Cyp4f40       | 1.317  | 8.180  | 2.297  | 0.045 | 0.327 | -3.947 |
| Oas3          | 0.448  | 7.146  | 2.297  | 0.045 | 0.327 | -3.948 |
| Klra4         | -0.696 | 6.758  | -2.296 | 0.045 | 0.327 | -3.948 |
| A21d1         | 0.241  | 10.422 | 2.296  | 0.045 | 0.327 | -3.948 |
| Kcna6         | -0.613 | 6.879  | -2.295 | 0.045 | 0.328 | -3.950 |
| Tapt1         | -0.226 | 10.502 | -2.295 | 0.045 | 0.328 | -3.950 |
| 3110043021Rik | -0.430 | 9.719  | -2.295 | 0.045 | 0.328 | -3.950 |
| Tmem52        | -0.226 | 6.464  | -2.293 | 0.045 | 0.328 | -3.953 |
| Aebp2         | 0.205  | 10.739 | 2.293  | 0.045 | 0.328 | -3.953 |
| Picalm        | 0.282  | 12.756 | 2.293  | 0.045 | 0.328 | -3.953 |
| Zfp579        | -0.495 | 8.494  | -2.293 | 0.045 | 0.328 | -3.953 |
| Lias          | 0.246  | 10.320 | 2.292  | 0.045 | 0.329 | -3.955 |
| Csf3          | 0.277  | 6.490  | 2.292  | 0.045 | 0.329 | -3.956 |
| Sec1414       | -0.654 | 7.093  | -2.291 | 0.045 | 0.329 | -3.956 |
| Fstl1         | 0.654  | 11.242 | 2.291  | 0.045 | 0.329 | -3.957 |
| Pttglip       | -0.564 | 12.727 | -2.291 | 0.045 | 0.329 | -3.957 |
| Megf9         | -0.222 | 8.728  | -2.290 | 0.045 | 0.329 | -3.958 |
| Rsf1          | 0.208  | 10.954 | 2.290  | 0.045 | 0.329 | -3.958 |
| Nmnat2        | -0.315 | 7.015  | -2.290 | 0.045 | 0.329 | -3.958 |

|               |        |        |        |       |       |        |
|---------------|--------|--------|--------|-------|-------|--------|
| Cd83          | 0.407  | 7.545  | 2.290  | 0.045 | 0.329 | -3.959 |
| Gm10562       | 0.254  | 6.478  | 2.289  | 0.045 | 0.329 | -3.959 |
| Lipa          | 0.829  | 11.060 | 2.289  | 0.045 | 0.329 | -3.959 |
| Pou2f2        | 0.413  | 6.845  | 2.289  | 0.045 | 0.329 | -3.959 |
| Dtx3l         | 0.727  | 9.951  | 2.289  | 0.045 | 0.329 | -3.959 |
| Dhrs3         | -0.463 | 10.968 | -2.289 | 0.045 | 0.329 | -3.959 |
| Hpcal1        | -0.329 | 10.150 | -2.289 | 0.045 | 0.329 | -3.960 |
| Klrb1f        | 0.262  | 6.482  | 2.289  | 0.045 | 0.329 | -3.960 |
| Dap           | -0.514 | 11.066 | -2.289 | 0.045 | 0.329 | -3.960 |
| Zfyve9        | 0.387  | 9.818  | 2.289  | 0.045 | 0.329 | -3.960 |
| Ktn1          | 0.250  | 11.137 | 2.289  | 0.045 | 0.329 | -3.960 |
| Sipal         | 0.285  | 8.113  | 2.288  | 0.045 | 0.329 | -3.961 |
| Pck2          | -0.411 | 9.184  | -2.288 | 0.045 | 0.329 | -3.961 |
| Gpr97         | 0.293  | 7.008  | 2.288  | 0.045 | 0.329 | -3.962 |
| Gm4963        | -0.285 | 8.940  | -2.288 | 0.045 | 0.329 | -3.962 |
| Rims3         | -0.315 | 6.909  | -2.287 | 0.045 | 0.329 | -3.962 |
| Fer116        | -1.040 | 11.813 | -2.287 | 0.045 | 0.329 | -3.963 |
| 2210408F21Rik | -0.288 | 7.337  | -2.286 | 0.045 | 0.329 | -3.964 |
| Sidt2         | 0.378  | 10.381 | 2.286  | 0.045 | 0.329 | -3.964 |
| Snord72       | 0.380  | 7.066  | 2.286  | 0.045 | 0.329 | -3.965 |
| Klh17         | -0.243 | 10.215 | -2.286 | 0.045 | 0.329 | -3.965 |
| Elov17        | -0.850 | 12.236 | -2.286 | 0.045 | 0.329 | -3.965 |
| Rhbd12        | -0.906 | 9.871  | -2.285 | 0.045 | 0.329 | -3.965 |
| D17Wsu104e    | -0.283 | 11.862 | -2.285 | 0.045 | 0.329 | -3.966 |
| Cd22          | 0.367  | 7.161  | 2.285  | 0.045 | 0.329 | -3.966 |
| Klh130        | -0.361 | 6.850  | -2.284 | 0.046 | 0.329 | -3.967 |
| Gm10288       | -0.301 | 10.355 | -2.284 | 0.046 | 0.329 | -3.968 |
| Ttc21a        | 0.215  | 6.459  | 2.284  | 0.046 | 0.329 | -3.968 |
| Nup214        | 0.211  | 9.218  | 2.284  | 0.046 | 0.329 | -3.968 |
| AL683847.1    | 0.224  | 6.495  | 2.283  | 0.046 | 0.329 | -3.968 |
| Ccr8          | 0.239  | 6.471  | 2.283  | 0.046 | 0.329 | -3.968 |
| Slc8a2        | -0.577 | 7.011  | -2.283 | 0.046 | 0.330 | -3.969 |
| Ccdc28b       | -0.436 | 8.404  | -2.283 | 0.046 | 0.330 | -3.969 |
| Slc9a6        | -0.476 | 10.528 | -2.282 | 0.046 | 0.330 | -3.970 |
| Fam171b       | -0.386 | 7.820  | -2.282 | 0.046 | 0.330 | -3.971 |
| Lrrc16a       | 0.308  | 10.515 | 2.281  | 0.046 | 0.330 | -3.972 |
| Dgcr2         | -0.205 | 10.670 | -2.281 | 0.046 | 0.330 | -3.972 |
| A530017D24Rik | -0.389 | 8.695  | -2.281 | 0.046 | 0.330 | -3.972 |
| Gm17179       | 0.313  | 6.632  | 2.281  | 0.046 | 0.330 | -3.972 |
| Gm11611       | -0.218 | 6.460  | -2.280 | 0.046 | 0.330 | -3.973 |
| Suv39h1       | 0.359  | 8.684  | 2.280  | 0.046 | 0.330 | -3.974 |
| Tspan17       | 0.433  | 8.202  | 2.280  | 0.046 | 0.330 | -3.974 |
| AC165356.1    | 0.629  | 6.839  | 2.279  | 0.046 | 0.330 | -3.975 |
| Dusp1         | 0.613  | 9.292  | 2.279  | 0.046 | 0.330 | -3.975 |
| A630023P12Rik | 0.248  | 6.476  | 2.279  | 0.046 | 0.330 | -3.975 |
| Socs7         | -0.214 | 10.018 | -2.278 | 0.046 | 0.330 | -3.976 |
| Thyn1         | -0.207 | 8.803  | -2.278 | 0.046 | 0.330 | -3.976 |
| Fzd5          | -0.731 | 11.882 | -2.278 | 0.046 | 0.331 | -3.977 |
| Ralbp1        | -0.250 | 11.729 | -2.277 | 0.046 | 0.331 | -3.977 |
| Bclaf1        | 0.216  | 12.306 | 2.277  | 0.046 | 0.331 | -3.978 |

|               |        |        |        |       |       |        |
|---------------|--------|--------|--------|-------|-------|--------|
| Lrrc58        | -0.293 | 11.130 | -2.277 | 0.046 | 0.331 | -3.978 |
| Snap23        | -0.159 | 11.603 | -2.277 | 0.046 | 0.331 | -3.978 |
| Adcy1         | -0.540 | 7.612  | -2.276 | 0.046 | 0.331 | -3.979 |
| Bbs1          | 0.246  | 7.590  | 2.276  | 0.046 | 0.331 | -3.980 |
| Ftl1          | -0.522 | 13.235 | -2.275 | 0.046 | 0.331 | -3.980 |
| A530016L24Rik | -0.257 | 6.480  | -2.275 | 0.046 | 0.331 | -3.981 |
| Trerf1        | -0.681 | 8.492  | -2.275 | 0.046 | 0.331 | -3.982 |
| Upkla         | -0.420 | 7.150  | -2.274 | 0.046 | 0.331 | -3.982 |
| Lrrc26        | -0.513 | 10.082 | -2.274 | 0.046 | 0.331 | -3.982 |
| Rictor        | 0.230  | 10.205 | 2.274  | 0.046 | 0.331 | -3.982 |
| Fyn           | 0.304  | 8.323  | 2.274  | 0.046 | 0.331 | -3.982 |
| Ipol3         | -0.401 | 9.142  | -2.274 | 0.046 | 0.331 | -3.983 |
| Gm12492       | -0.221 | 6.641  | -2.274 | 0.046 | 0.331 | -3.983 |
| Strn3         | -0.256 | 11.454 | -2.274 | 0.046 | 0.331 | -3.983 |
| Tagln2        | -0.806 | 13.896 | -2.273 | 0.046 | 0.331 | -3.983 |
| Grial         | -0.688 | 6.934  | -2.273 | 0.046 | 0.331 | -3.984 |
| Tesk1         | 0.183  | 9.217  | 2.273  | 0.046 | 0.331 | -3.984 |
| Pcyox1        | -0.239 | 11.977 | -2.273 | 0.046 | 0.331 | -3.985 |
| Card11        | 0.617  | 7.487  | 2.272  | 0.046 | 0.331 | -3.985 |
| Zfp61         | -0.324 | 8.253  | -2.272 | 0.046 | 0.331 | -3.985 |
| Ensa          | 0.254  | 11.418 | 2.272  | 0.046 | 0.331 | -3.986 |
| Gpr183        | 0.298  | 7.154  | 2.272  | 0.047 | 0.331 | -3.986 |
| Efcab5        | 0.566  | 7.273  | 2.272  | 0.047 | 0.331 | -3.986 |
| Cldn5         | -0.463 | 7.201  | -2.271 | 0.047 | 0.331 | -3.987 |
| Plac9         | -0.551 | 7.271  | -2.271 | 0.047 | 0.331 | -3.987 |
| Tmco4         | 0.380  | 9.273  | 2.271  | 0.047 | 0.331 | -3.988 |
| Psg25         | 0.398  | 6.628  | 2.271  | 0.047 | 0.331 | -3.988 |
| Mcpt9         | 0.241  | 6.526  | 2.271  | 0.047 | 0.331 | -3.988 |
| Rs11          | -0.305 | 8.056  | -2.271 | 0.047 | 0.331 | -3.988 |
| Gm12974       | -0.217 | 6.460  | -2.270 | 0.047 | 0.331 | -3.989 |
| Nkain1        | 0.963  | 9.013  | 2.270  | 0.047 | 0.331 | -3.989 |
| Parp8         | 0.244  | 8.045  | 2.269  | 0.047 | 0.332 | -3.990 |
| Lrrc8e        | -0.787 | 9.481  | -2.269 | 0.047 | 0.332 | -3.990 |
| Rars          | 0.304  | 11.460 | 2.269  | 0.047 | 0.332 | -3.991 |
| Cab39         | -0.383 | 13.180 | -2.268 | 0.047 | 0.332 | -3.991 |
| Tgm2          | 0.839  | 11.120 | 2.268  | 0.047 | 0.332 | -3.991 |
| 2410066E13Rik | -0.357 | 7.803  | -2.268 | 0.047 | 0.332 | -3.992 |
| Adprh12       | -0.252 | 9.134  | -2.268 | 0.047 | 0.332 | -3.992 |
| Pde4c         | -0.466 | 8.272  | -2.268 | 0.047 | 0.332 | -3.993 |
| Gm10025       | 0.267  | 7.429  | 2.268  | 0.047 | 0.332 | -3.993 |
| Srd5a1        | 0.741  | 8.776  | 2.267  | 0.047 | 0.332 | -3.993 |
| Nlrplc        | 0.392  | 6.796  | 2.267  | 0.047 | 0.332 | -3.993 |
| Gm15898       | 0.345  | 6.612  | 2.267  | 0.047 | 0.332 | -3.994 |
| Cpped1        | 0.303  | 10.870 | 2.267  | 0.047 | 0.332 | -3.994 |
| Zfpm2         | -0.393 | 6.779  | -2.267 | 0.047 | 0.332 | -3.994 |
| Arhgef11      | 0.307  | 10.163 | 2.267  | 0.047 | 0.332 | -3.994 |
| Cnm3          | -0.205 | 8.866  | -2.266 | 0.047 | 0.332 | -3.994 |
| Asphd1        | -0.256 | 6.634  | -2.266 | 0.047 | 0.332 | -3.995 |
| B3galt1       | 0.379  | 9.069  | 2.266  | 0.047 | 0.332 | -3.995 |
| 6330409D20Rik | 0.220  | 6.461  | 2.265  | 0.047 | 0.332 | -3.996 |

|               |        |        |        |       |       |        |
|---------------|--------|--------|--------|-------|-------|--------|
| Gm16135       | 0.233  | 6.468  | 2.264  | 0.047 | 0.332 | -3.997 |
| Slc40a1       | 2.813  | 11.391 | 2.264  | 0.047 | 0.332 | -3.998 |
| Arsb          | -0.318 | 9.879  | -2.264 | 0.047 | 0.332 | -3.998 |
| 4933404M02Rik | 0.358  | 7.386  | 2.264  | 0.047 | 0.332 | -3.998 |
| Cadps         | -0.551 | 7.252  | -2.264 | 0.047 | 0.332 | -3.999 |
| Oraov1        | -0.270 | 9.815  | -2.263 | 0.047 | 0.332 | -3.999 |
| A330041J22Rik | -0.237 | 6.533  | -2.263 | 0.047 | 0.332 | -4.000 |
| Lman2         | -0.180 | 12.370 | -2.263 | 0.047 | 0.332 | -4.000 |
| Reck          | -0.344 | 7.729  | -2.263 | 0.047 | 0.332 | -4.000 |
| Rnf208        | -0.562 | 7.508  | -2.263 | 0.047 | 0.332 | -4.000 |
| Rdh11         | 0.365  | 10.161 | 2.262  | 0.047 | 0.333 | -4.001 |
| Gm9920        | -0.292 | 7.549  | -2.262 | 0.047 | 0.333 | -4.001 |
| Slc25a22      | 0.604  | 8.868  | 2.261  | 0.047 | 0.333 | -4.002 |
| Colec12       | 0.701  | 9.382  | 2.261  | 0.047 | 0.333 | -4.002 |
| AC122379.1    | 0.219  | 6.461  | 2.261  | 0.047 | 0.333 | -4.002 |
| 4933440N22Rik | 0.309  | 6.680  | 2.261  | 0.047 | 0.333 | -4.002 |
| Galnt13       | -0.239 | 6.912  | -2.261 | 0.047 | 0.333 | -4.003 |
| Rasgef1b      | -0.734 | 11.272 | -2.261 | 0.047 | 0.333 | -4.003 |
| Lrp12         | 0.261  | 8.602  | 2.261  | 0.047 | 0.333 | -4.003 |
| Prr5          | 0.371  | 8.690  | 2.261  | 0.047 | 0.333 | -4.003 |
| Atp6ap1       | -0.205 | 12.111 | -2.260 | 0.047 | 0.333 | -4.004 |
| Bag2          | -0.499 | 8.492  | -2.260 | 0.047 | 0.333 | -4.005 |
| Gm12750       | 0.872  | 8.817  | 2.259  | 0.047 | 0.333 | -4.006 |
| AC125010.1    | 0.137  | 6.420  | 2.259  | 0.048 | 0.333 | -4.006 |
| Serinc2       | -0.461 | 12.064 | -2.259 | 0.048 | 0.333 | -4.006 |
| Fbxo41        | -0.241 | 6.532  | -2.259 | 0.048 | 0.333 | -4.006 |
| Gm10086       | -0.222 | 6.496  | -2.258 | 0.048 | 0.333 | -4.007 |
| Numb1         | -0.359 | 7.934  | -2.258 | 0.048 | 0.333 | -4.007 |
| AL589670.1    | -0.185 | 6.573  | -2.258 | 0.048 | 0.333 | -4.007 |
| Cenpl         | 0.266  | 8.462  | 2.258  | 0.048 | 0.333 | -4.008 |
| Calr          | -0.540 | 16.113 | -2.258 | 0.048 | 0.333 | -4.008 |
| Wisp2         | 0.678  | 7.163  | 2.257  | 0.048 | 0.333 | -4.009 |
| Far1          | -1.466 | 13.897 | -2.257 | 0.048 | 0.333 | -4.009 |
| Idh3a         | 0.266  | 11.769 | 2.256  | 0.048 | 0.334 | -4.010 |
| Cend1         | -0.400 | 7.163  | -2.256 | 0.048 | 0.334 | -4.010 |
| Top2a         | 0.558  | 12.252 | 2.255  | 0.048 | 0.334 | -4.011 |
| Adam15        | -0.481 | 9.783  | -2.255 | 0.048 | 0.334 | -4.012 |
| Sult1a1       | -0.518 | 7.973  | -2.255 | 0.048 | 0.334 | -4.012 |
| Mamdc2        | -0.777 | 7.860  | -2.254 | 0.048 | 0.334 | -4.013 |
| Igkv5-39      | 0.846  | 7.079  | 2.254  | 0.048 | 0.334 | -4.014 |
| Mtap          | -0.457 | 9.467  | -2.253 | 0.048 | 0.334 | -4.015 |
| D730003I15Rik | -0.210 | 7.404  | -2.253 | 0.048 | 0.334 | -4.015 |
| Plk4          | 0.390  | 9.314  | 2.253  | 0.048 | 0.334 | -4.016 |
| Gm7292        | 0.324  | 10.120 | 2.253  | 0.048 | 0.334 | -4.016 |
| Ras112        | -0.406 | 7.310  | -2.252 | 0.048 | 0.334 | -4.016 |
| Nfs1          | -0.193 | 9.940  | -2.252 | 0.048 | 0.334 | -4.016 |
| Gm17509       | -0.325 | 6.638  | -2.252 | 0.048 | 0.335 | -4.017 |
| Lrrc42        | -0.337 | 9.262  | -2.252 | 0.048 | 0.335 | -4.017 |
| Rpl17-ps5     | -0.535 | 7.862  | -2.251 | 0.048 | 0.335 | -4.017 |
| Isoc2a        | -0.560 | 9.424  | -2.251 | 0.048 | 0.335 | -4.018 |

|               |        |        |        |       |       |        |
|---------------|--------|--------|--------|-------|-------|--------|
| Cda           | 1.474  | 8.588  | 2.251  | 0.048 | 0.335 | -4.018 |
| D6Wsu116e     | 0.255  | 10.919 | 2.250  | 0.048 | 0.335 | -4.019 |
| Gm10244       | -0.246 | 6.527  | -2.250 | 0.048 | 0.335 | -4.019 |
| Cdc23         | -0.205 | 9.790  | -2.250 | 0.048 | 0.335 | -4.019 |
| Mrgprx2       | -0.304 | 6.503  | -2.250 | 0.048 | 0.335 | -4.020 |
| Morn4         | -0.273 | 7.034  | -2.250 | 0.048 | 0.335 | -4.020 |
| Sgsm3         | -0.400 | 10.479 | -2.249 | 0.048 | 0.335 | -4.021 |
| Gm5506        | 0.301  | 9.413  | 2.249  | 0.048 | 0.335 | -4.022 |
| Gm5546        | -0.210 | 6.456  | -2.249 | 0.048 | 0.335 | -4.022 |
| Aurkaip1      | -0.289 | 10.443 | -2.248 | 0.048 | 0.335 | -4.022 |
| AU041133      | 0.282  | 7.560  | 2.248  | 0.048 | 0.335 | -4.022 |
| Ccl3          | 0.374  | 6.701  | 2.248  | 0.048 | 0.335 | -4.023 |
| Nudt2         | -0.318 | 8.784  | -2.247 | 0.048 | 0.336 | -4.024 |
| Aatk          | -0.551 | 7.185  | -2.247 | 0.048 | 0.336 | -4.024 |
| Acox2         | -0.677 | 7.833  | -2.247 | 0.048 | 0.336 | -4.024 |
| Cacna2d3      | -0.329 | 6.908  | -2.247 | 0.049 | 0.336 | -4.025 |
| Cd55          | 0.397  | 11.883 | 2.246  | 0.049 | 0.336 | -4.025 |
| Exoc8         | -0.206 | 9.723  | -2.246 | 0.049 | 0.336 | -4.025 |
| Bcl11b        | 0.666  | 8.689  | 2.246  | 0.049 | 0.336 | -4.026 |
| Sgcg          | -0.238 | 6.470  | -2.246 | 0.049 | 0.336 | -4.026 |
| Stxbp2        | -0.296 | 12.116 | -2.246 | 0.049 | 0.336 | -4.026 |
| Ints9         | 0.265  | 8.723  | 2.246  | 0.049 | 0.336 | -4.026 |
| Eci3          | 0.665  | 7.712  | 2.245  | 0.049 | 0.336 | -4.027 |
| Amph          | -0.347 | 6.904  | -2.245 | 0.049 | 0.336 | -4.027 |
| Cacnals       | 0.325  | 6.672  | 2.245  | 0.049 | 0.336 | -4.028 |
| Cblb          | -0.367 | 9.621  | -2.244 | 0.049 | 0.336 | -4.028 |
| Smad5         | 0.221  | 10.617 | 2.244  | 0.049 | 0.336 | -4.029 |
| Sec14l2       | 1.172  | 8.615  | 2.243  | 0.049 | 0.336 | -4.030 |
| Ighv3-8       | 1.267  | 7.568  | 2.243  | 0.049 | 0.336 | -4.031 |
| Fam150a       | -0.357 | 6.668  | -2.242 | 0.049 | 0.336 | -4.031 |
| Rheb          | -0.192 | 11.062 | -2.242 | 0.049 | 0.337 | -4.032 |
| Adhfe1        | -0.616 | 8.012  | -2.242 | 0.049 | 0.337 | -4.032 |
| Cysltr2       | 0.338  | 6.877  | 2.242  | 0.049 | 0.337 | -4.032 |
| Fgfr1op2      | -0.195 | 11.624 | -2.241 | 0.049 | 0.337 | -4.033 |
| Lpar4         | -0.350 | 7.228  | -2.241 | 0.049 | 0.337 | -4.033 |
| Fcgrt         | 0.937  | 10.317 | 2.241  | 0.049 | 0.337 | -4.034 |
| Gm8121        | -0.333 | 7.567  | -2.241 | 0.049 | 0.337 | -4.034 |
| Pik3c2b       | 0.268  | 10.709 | 2.240  | 0.049 | 0.337 | -4.035 |
| BC017643      | -0.247 | 9.773  | -2.240 | 0.049 | 0.337 | -4.035 |
| Rpl13-ps1     | -0.148 | 6.487  | -2.239 | 0.049 | 0.337 | -4.036 |
| Ccdc159       | -0.337 | 7.025  | -2.239 | 0.049 | 0.337 | -4.036 |
| Chrna3        | -0.579 | 6.870  | -2.239 | 0.049 | 0.337 | -4.037 |
| Tmem164       | -0.713 | 12.272 | -2.239 | 0.049 | 0.337 | -4.037 |
| Zkscan4       | -0.239 | 7.145  | -2.238 | 0.049 | 0.337 | -4.037 |
| Ccnel         | 0.392  | 8.136  | 2.238  | 0.049 | 0.337 | -4.037 |
| Nagk          | -0.224 | 10.031 | -2.238 | 0.049 | 0.337 | -4.038 |
| 1700021J08Rik | 0.333  | 6.875  | 2.238  | 0.049 | 0.337 | -4.038 |
| F630043A04Rik | 0.295  | 8.229  | 2.238  | 0.049 | 0.337 | -4.038 |
| Ubxn1         | -0.541 | 12.067 | -2.238 | 0.049 | 0.337 | -4.038 |
| Kif2c         | 0.424  | 9.059  | 2.238  | 0.049 | 0.337 | -4.039 |



|               |        |        |        |       |       |        |
|---------------|--------|--------|--------|-------|-------|--------|
| Radil         | -0.291 | 6.610  | -2.237 | 0.049 | 0.337 | -4.039 |
| Ddt           | -0.269 | 8.747  | -2.237 | 0.049 | 0.337 | -4.039 |
| Txnip         | -0.367 | 13.802 | -2.237 | 0.049 | 0.337 | -4.039 |
| Jph4          | -0.386 | 7.079  | -2.237 | 0.049 | 0.337 | -4.040 |
| Pclo          | -0.183 | 7.451  | -2.237 | 0.049 | 0.337 | -4.040 |
| Arpc3         | -0.280 | 12.180 | -2.237 | 0.049 | 0.337 | -4.040 |
| Tmem175       | 0.278  | 8.612  | 2.237  | 0.049 | 0.337 | -4.040 |
| Rnf138        | -0.266 | 9.759  | -2.236 | 0.049 | 0.337 | -4.040 |
| Prr151        | -0.234 | 11.624 | -2.236 | 0.049 | 0.337 | -4.040 |
| Hspd1         | 0.384  | 13.185 | 2.236  | 0.049 | 0.337 | -4.041 |
| I118rap       | 1.295  | 8.236  | 2.236  | 0.049 | 0.337 | -4.041 |
| Ccdc11        | -0.203 | 6.453  | -2.236 | 0.049 | 0.337 | -4.041 |
| Stam          | -0.208 | 10.458 | -2.236 | 0.049 | 0.337 | -4.042 |
| Tank          | 0.239  | 10.217 | 2.235  | 0.049 | 0.337 | -4.042 |
| BC029214      | -0.352 | 8.683  | -2.234 | 0.050 | 0.337 | -4.043 |
| Gm14537       | -0.262 | 6.546  | -2.234 | 0.050 | 0.338 | -4.045 |
| BC024978      | -0.176 | 8.144  | -2.234 | 0.050 | 0.338 | -4.045 |
| Ficd          | -0.357 | 8.488  | -2.233 | 0.050 | 0.338 | -4.045 |
| Clec4a3       | 0.397  | 7.521  | 2.233  | 0.050 | 0.338 | -4.046 |
| Mospd1        | 0.446  | 9.592  | 2.231  | 0.050 | 0.339 | -4.048 |
| Cxcl1         | 1.585  | 7.941  | 2.231  | 0.050 | 0.339 | -4.049 |
| Aes           | -0.310 | 12.261 | -2.231 | 0.050 | 0.339 | -4.049 |
| Gm4978        | -0.137 | 6.420  | -2.231 | 0.050 | 0.339 | -4.049 |
| 5730409E04Rik | -0.324 | 8.362  | -2.230 | 0.050 | 0.339 | -4.050 |
| Greb11        | 0.654  | 8.721  | 2.230  | 0.050 | 0.339 | -4.050 |
| Ranbp3        | -0.279 | 10.098 | -2.230 | 0.050 | 0.339 | -4.050 |
| Dnase1        | 0.386  | 6.934  | 2.230  | 0.050 | 0.339 | -4.051 |
| 1700034H14Rik | 0.185  | 9.417  | 2.229  | 0.050 | 0.339 | -4.051 |

**Table S5. Differential expression of genes in GSE13873**

| Symbol        | logFC  | AveExpr | t      | P. Value | adj. P. Val | B      |
|---------------|--------|---------|--------|----------|-------------|--------|
| Pigr          | 6.005  | 11.384  | 24.271 | 0.000    | 0.000       | 19.465 |
| Nfkbiz        | 2.558  | 10.078  | 16.166 | 0.000    | 0.000       | 15.492 |
| Tnfsf12       | 3.024  | 8.239   | 13.964 | 0.000    | 0.000       | 13.797 |
| Sftpd         | 4.716  | 10.096  | 12.686 | 0.000    | 0.000       | 12.631 |
| Trp53bp1      | 1.413  | 7.350   | 11.870 | 0.000    | 0.000       | 11.807 |
| Clca2         | 5.404  | 7.998   | 11.549 | 0.000    | 0.000       | 11.463 |
| Clca1         | 5.172  | 7.599   | 10.957 | 0.000    | 0.000       | 10.799 |
| Dock11        | 2.614  | 9.463   | 10.515 | 0.000    | 0.000       | 10.278 |
| Dmbt1         | 3.527  | 12.935  | 10.307 | 0.000    | 0.000       | 10.024 |
| Cd177         | 5.345  | 10.003  | 9.077  | 0.000    | 0.000       | 8.406  |
| Tomm201       | -1.145 | 4.356   | -8.859 | 0.000    | 0.000       | 8.098  |
| Zc3h12a       | 2.005  | 7.113   | 8.635  | 0.000    | 0.000       | 7.774  |
| Tnfsf13os     | 2.318  | 7.080   | 8.270  | 0.000    | 0.000       | 7.230  |
| Ptprc         | 2.696  | 8.039   | 8.258  | 0.000    | 0.000       | 7.212  |
| Prl3d1        | -1.075 | 5.125   | -8.211 | 0.000    | 0.000       | 7.142  |
| Duoxa2        | 1.895  | 7.245   | 7.984  | 0.000    | 0.000       | 6.791  |
| Gimap8        | 2.078  | 5.935   | 7.403  | 0.000    | 0.001       | 5.859  |
| Fyb           | 1.548  | 7.093   | 7.104  | 0.000    | 0.002       | 5.357  |
| Taf2          | 0.733  | 6.936   | 7.078  | 0.000    | 0.002       | 5.314  |
| Ranbp31       | -1.591 | 4.968   | -7.009 | 0.000    | 0.002       | 5.195  |
| Gzmc          | -0.715 | 2.775   | -6.960 | 0.000    | 0.002       | 5.112  |
| Birc3         | 1.470  | 8.557   | 6.906  | 0.000    | 0.002       | 5.019  |
| Rc3h1         | 0.933  | 8.647   | 6.904  | 0.000    | 0.002       | 5.016  |
| A930002I21Rik | -0.907 | 3.253   | -6.886 | 0.000    | 0.002       | 4.984  |
| Gm15455       | 1.357  | 8.475   | 6.873  | 0.000    | 0.002       | 4.962  |
| Clstn2        | -1.071 | 5.000   | -6.831 | 0.000    | 0.002       | 4.888  |
| Gdf9          | -1.917 | 5.503   | -6.801 | 0.000    | 0.002       | 4.836  |
| Angpt1        | -0.833 | 3.885   | -6.719 | 0.000    | 0.003       | 4.693  |
| Vill          | 2.303  | 9.664   | 6.687  | 0.000    | 0.003       | 4.636  |
| Cyba          | 2.025  | 9.667   | 6.681  | 0.000    | 0.003       | 4.625  |
| LOC102635622  | -0.797 | 4.446   | -6.629 | 0.000    | 0.003       | 4.533  |
| Dtna          | -1.430 | 4.661   | -6.608 | 0.000    | 0.003       | 4.496  |
| Cebpa         | 1.319  | 7.759   | 6.518  | 0.000    | 0.003       | 4.337  |
| Prdx6         | 1.246  | 11.010  | 6.507  | 0.000    | 0.003       | 4.316  |
| Tspan14       | 0.992  | 8.823   | 6.488  | 0.000    | 0.003       | 4.282  |
| Kcng2         | -0.735 | 5.188   | -6.476 | 0.000    | 0.003       | 4.261  |
| Plscr1        | 1.592  | 8.180   | 6.452  | 0.000    | 0.003       | 4.218  |
| Yeats2        | 1.275  | 6.170   | 6.403  | 0.000    | 0.003       | 4.129  |
| Ikbke         | 1.119  | 6.547   | 6.386  | 0.000    | 0.003       | 4.099  |
| Apobec3       | 1.760  | 8.603   | 6.331  | 0.000    | 0.004       | 3.998  |
| Unc5c1        | 1.467  | 6.795   | 6.329  | 0.000    | 0.004       | 3.995  |
| Rgs2          | 1.129  | 7.139   | 6.322  | 0.000    | 0.004       | 3.982  |
| Sh3bp2        | 1.096  | 5.787   | 6.314  | 0.000    | 0.004       | 3.968  |
| Slc26a7       | -1.648 | 4.808   | -6.314 | 0.000    | 0.004       | 3.968  |
| Igh-VJ558     | 4.851  | 12.229  | 6.301  | 0.000    | 0.004       | 3.944  |
| Btf3          | 0.818  | 9.880   | 6.265  | 0.000    | 0.004       | 3.878  |
| Gas5          | 1.056  | 10.027  | 6.263  | 0.000    | 0.004       | 3.874  |

|               |        |        |        |       |       |       |
|---------------|--------|--------|--------|-------|-------|-------|
| Prdm2         | 0.899  | 6.996  | 6.254  | 0.000 | 0.004 | 3.859 |
| Gper1         | -2.591 | 5.581  | -6.251 | 0.000 | 0.004 | 3.852 |
| Scrn1         | -0.758 | 5.218  | -6.220 | 0.000 | 0.004 | 3.796 |
| Naip5         | 3.921  | 7.050  | 6.216  | 0.000 | 0.004 | 3.788 |
| Casp4         | 2.930  | 6.611  | 6.211  | 0.000 | 0.004 | 3.779 |
| Pop1          | 1.269  | 5.101  | 6.209  | 0.000 | 0.004 | 3.776 |
| 2210416015Rik | -0.811 | 5.764  | -6.201 | 0.000 | 0.004 | 3.762 |
| Ero11b        | -1.941 | 6.012  | -6.160 | 0.000 | 0.004 | 3.685 |
| 2810474C18Rik | -0.736 | 3.159  | -6.157 | 0.000 | 0.004 | 3.679 |
| Stk32b        | -1.995 | 4.408  | -6.141 | 0.000 | 0.004 | 3.651 |
| Plekha2       | 1.039  | 9.761  | 6.047  | 0.000 | 0.004 | 3.477 |
| Fam13b        | 0.656  | 8.296  | 6.042  | 0.000 | 0.004 | 3.466 |
| Tgfb1         | 1.330  | 6.159  | 6.039  | 0.000 | 0.004 | 3.461 |
| Sostdc1       | -3.020 | 3.920  | -6.036 | 0.000 | 0.004 | 3.455 |
| Wdr43         | 0.965  | 7.430  | 6.004  | 0.000 | 0.005 | 3.396 |
| Pglyrp1       | 3.033  | 9.380  | 5.969  | 0.000 | 0.005 | 3.331 |
| Fkbp6         | -1.148 | 5.993  | -5.968 | 0.000 | 0.005 | 3.328 |
| Igbp1         | -1.544 | 6.602  | -5.937 | 0.000 | 0.005 | 3.271 |
| Rnf149        | -0.874 | 10.102 | -5.917 | 0.000 | 0.005 | 3.232 |
| Cnpy4         | 0.804  | 7.119  | 5.908  | 0.000 | 0.005 | 3.215 |
| Zcchc12       | -0.873 | 5.966  | -5.905 | 0.000 | 0.005 | 3.210 |
| 4933407I05Rik | -0.761 | 3.377  | -5.895 | 0.000 | 0.005 | 3.191 |
| Hdac11        | -1.092 | 6.666  | -5.889 | 0.000 | 0.005 | 3.181 |
| Alg8          | 0.794  | 7.782  | 5.888  | 0.000 | 0.005 | 3.179 |
| Rnf167        | -0.865 | 7.983  | -5.878 | 0.000 | 0.005 | 3.159 |
| A930017M01Rik | -0.834 | 3.219  | -5.877 | 0.000 | 0.005 | 3.158 |
| Tjp3          | 0.782  | 9.697  | 5.862  | 0.000 | 0.005 | 3.130 |
| Pabpn1        | 1.040  | 6.517  | 5.857  | 0.000 | 0.005 | 3.120 |
| Pccb          | -0.918 | 8.513  | -5.827 | 0.000 | 0.005 | 3.063 |
| Tlr1          | 1.669  | 5.549  | 5.821  | 0.000 | 0.005 | 3.052 |
| 4932702P03Rik | -0.677 | 2.905  | -5.821 | 0.000 | 0.005 | 3.052 |
| Steap1        | 1.666  | 7.403  | 5.800  | 0.000 | 0.006 | 3.011 |
| Lifr          | -1.748 | 6.216  | -5.789 | 0.000 | 0.006 | 2.991 |
| Calr3         | -1.187 | 3.611  | -5.786 | 0.000 | 0.006 | 2.986 |
| Coro6         | -0.716 | 3.159  | -5.768 | 0.000 | 0.006 | 2.951 |
| Kcnf1         | -0.969 | 5.194  | -5.764 | 0.000 | 0.006 | 2.944 |
| Blm           | -1.526 | 5.916  | -5.759 | 0.000 | 0.006 | 2.933 |
| Nucks1        | 0.553  | 10.447 | 5.754  | 0.000 | 0.006 | 2.924 |
| 1810007D17Rik | -0.971 | 3.015  | -5.736 | 0.000 | 0.006 | 2.890 |
| Dok1          | 1.146  | 6.390  | 5.725  | 0.000 | 0.006 | 2.869 |
| Igj           | 5.601  | 9.714  | 5.725  | 0.000 | 0.006 | 2.869 |
| Dusp14        | -0.902 | 6.191  | -5.711 | 0.000 | 0.006 | 2.843 |
| Armc9         | -0.598 | 3.226  | -5.708 | 0.000 | 0.006 | 2.837 |
| Slc9b2        | -1.242 | 5.243  | -5.703 | 0.000 | 0.006 | 2.827 |
| LOC102634389  | -0.844 | 5.025  | -5.696 | 0.000 | 0.006 | 2.814 |
| Esx1          | -0.607 | 3.232  | -5.666 | 0.000 | 0.006 | 2.757 |
| Hykk          | -1.312 | 5.443  | -5.627 | 0.000 | 0.007 | 2.681 |
| Gm7173        | -0.490 | 2.524  | -5.621 | 0.000 | 0.007 | 2.669 |
| 4930527J03Rik | -0.686 | 4.753  | -5.617 | 0.000 | 0.007 | 2.663 |
| Gar1          | 1.077  | 8.442  | 5.615  | 0.000 | 0.007 | 2.658 |

|               |        |        |        |       |       |       |
|---------------|--------|--------|--------|-------|-------|-------|
| Nono          | 0.688  | 9.649  | 5.603  | 0.000 | 0.007 | 2.635 |
| Slc29a4       | -0.696 | 3.229  | -5.603 | 0.000 | 0.007 | 2.635 |
| Mthfr         | -0.871 | 3.522  | -5.586 | 0.000 | 0.007 | 2.602 |
| Wnt11         | 1.156  | 7.353  | 5.565  | 0.000 | 0.007 | 2.562 |
| 1110038B12Rik | 1.213  | 8.372  | 5.560  | 0.000 | 0.007 | 2.552 |
| F2r           | 1.493  | 7.242  | 5.559  | 0.000 | 0.007 | 2.550 |
| Zdhhc18       | 1.134  | 7.348  | 5.552  | 0.000 | 0.007 | 2.537 |
| Nap111        | 1.468  | 7.998  | 5.538  | 0.000 | 0.007 | 2.509 |
| Sstr2         | -1.931 | 6.000  | -5.533 | 0.000 | 0.007 | 2.501 |
| Ftmt          | -0.675 | 3.363  | -5.522 | 0.000 | 0.007 | 2.479 |
| Ydjc          | 0.877  | 6.818  | 5.511  | 0.000 | 0.007 | 2.457 |
| Rab6b         | -1.187 | 4.202  | -5.499 | 0.000 | 0.007 | 2.434 |
| Tmem158       | 1.336  | 6.675  | 5.485  | 0.000 | 0.007 | 2.408 |
| Lrch1         | 0.583  | 7.483  | 5.482  | 0.000 | 0.007 | 2.402 |
| Snhg1         | 1.496  | 7.701  | 5.467  | 0.000 | 0.008 | 2.372 |
| Gss           | 0.679  | 9.009  | 5.461  | 0.000 | 0.008 | 2.360 |
| Nudt10        | -0.876 | 3.598  | -5.456 | 0.000 | 0.008 | 2.351 |
| Bak1          | 1.253  | 7.911  | 5.453  | 0.000 | 0.008 | 2.344 |
| Amot12        | -1.215 | 6.884  | -5.444 | 0.000 | 0.008 | 2.327 |
| Tmc5          | 1.700  | 8.059  | 5.442  | 0.000 | 0.008 | 2.323 |
| 1810013A23Rik | -0.605 | 4.867  | -5.426 | 0.000 | 0.008 | 2.291 |
| Hdac1         | 0.685  | 9.667  | 5.425  | 0.000 | 0.008 | 2.291 |
| Arhgef33      | -0.636 | 3.091  | -5.410 | 0.000 | 0.008 | 2.262 |
| Pxylp1        | -1.071 | 7.867  | -5.404 | 0.000 | 0.008 | 2.250 |
| BC049762      | -0.936 | 4.119  | -5.400 | 0.000 | 0.008 | 2.242 |
| Syt17         | -0.802 | 4.207  | -5.398 | 0.000 | 0.008 | 2.238 |
| Ttc9          | 1.970  | 5.096  | 5.388  | 0.000 | 0.008 | 2.218 |
| Adamts11      | -0.706 | 3.173  | -5.387 | 0.000 | 0.008 | 2.215 |
| D3Ert751e     | -0.644 | 3.489  | -5.356 | 0.000 | 0.008 | 2.155 |
| Lnx1          | -0.881 | 6.874  | -5.354 | 0.000 | 0.008 | 2.152 |
| Neurog2       | -0.797 | 3.471  | -5.354 | 0.000 | 0.008 | 2.151 |
| Bend7         | -0.818 | 3.409  | -5.351 | 0.000 | 0.008 | 2.145 |
| Lefty1        | -0.840 | 6.028  | -5.343 | 0.000 | 0.009 | 2.129 |
| Slc36a1os     | -0.880 | 4.120  | -5.335 | 0.000 | 0.009 | 2.115 |
| 4930500G05Rik | -0.625 | 4.298  | -5.334 | 0.000 | 0.009 | 2.113 |
| Isg2012       | 0.742  | 7.760  | 5.307  | 0.000 | 0.009 | 2.060 |
| Egf           | -2.620 | 4.887  | -5.295 | 0.000 | 0.009 | 2.035 |
| 2210409E12Rik | -1.126 | 3.544  | -5.294 | 0.000 | 0.009 | 2.033 |
| Pum2          | 0.728  | 9.167  | 5.291  | 0.000 | 0.009 | 2.027 |
| Igk-V28       | 4.637  | 11.792 | 5.290  | 0.000 | 0.009 | 2.026 |
| Atoh8         | -0.668 | 5.323  | -5.286 | 0.000 | 0.009 | 2.019 |
| Nr2f1         | 0.683  | 2.966  | 5.283  | 0.000 | 0.009 | 2.012 |
| Mgat4a        | 0.656  | 8.938  | 5.274  | 0.000 | 0.009 | 1.994 |
| Gatm          | 1.032  | 5.506  | 5.256  | 0.000 | 0.009 | 1.959 |
| Prss44        | -0.848 | 5.914  | -5.255 | 0.000 | 0.009 | 1.956 |
| Med20         | 0.774  | 7.671  | 5.239  | 0.000 | 0.010 | 1.927 |
| Utp6          | 1.052  | 6.704  | 5.226  | 0.000 | 0.010 | 1.900 |
| Gm12888       | -2.976 | 4.262  | -5.224 | 0.000 | 0.010 | 1.895 |
| Fam124a       | 1.168  | 6.340  | 5.211  | 0.000 | 0.010 | 1.871 |
| Tjp2          | 0.581  | 9.551  | 5.209  | 0.000 | 0.010 | 1.865 |

|               |        |        |        |       |       |       |
|---------------|--------|--------|--------|-------|-------|-------|
| Fam174b       | -0.561 | 8.853  | -5.207 | 0.000 | 0.010 | 1.862 |
| Ceacam13      | -0.609 | 2.480  | -5.198 | 0.000 | 0.010 | 1.844 |
| Gm10362       | 0.568  | 12.400 | 5.190  | 0.000 | 0.010 | 1.829 |
| 2410006H16Rik | 1.224  | 8.450  | 5.178  | 0.000 | 0.010 | 1.806 |
| Paqr8         | 0.609  | 8.263  | 5.170  | 0.000 | 0.010 | 1.790 |
| Tcl1b4        | -0.646 | 5.868  | -5.161 | 0.000 | 0.011 | 1.771 |
| Rac2          | 1.270  | 7.026  | 5.153  | 0.000 | 0.011 | 1.756 |
| Ccdc68        | -1.132 | 7.213  | -5.150 | 0.000 | 0.011 | 1.749 |
| Csnk1g3       | 0.627  | 7.710  | 5.140  | 0.000 | 0.011 | 1.730 |
| Tenc1         | -0.746 | 6.887  | -5.110 | 0.000 | 0.011 | 1.670 |
| Wnt5a         | 0.819  | 4.729  | 5.107  | 0.000 | 0.011 | 1.665 |
| Gm26745       | -0.718 | 3.596  | -5.098 | 0.000 | 0.012 | 1.646 |
| Sh3pxd2b      | 0.923  | 7.843  | 5.095  | 0.000 | 0.012 | 1.640 |
| Mnx1          | -0.720 | 2.973  | -5.090 | 0.000 | 0.012 | 1.630 |
| Gng11         | -0.676 | 6.163  | -5.083 | 0.000 | 0.012 | 1.616 |
| Cdcp1         | 0.782  | 9.533  | 5.077  | 0.000 | 0.012 | 1.605 |
| Plek2         | 1.185  | 8.358  | 5.072  | 0.000 | 0.012 | 1.594 |
| 2300009A05Rik | -0.797 | 6.682  | -5.063 | 0.000 | 0.012 | 1.576 |
| AU022255      | -0.618 | 4.682  | -5.063 | 0.000 | 0.012 | 1.576 |
| Der13         | -1.601 | 7.118  | -5.060 | 0.000 | 0.012 | 1.570 |
| Slc6a9        | 0.848  | 9.134  | 5.057  | 0.000 | 0.012 | 1.565 |
| Clnkos        | -0.659 | 3.265  | -5.055 | 0.000 | 0.012 | 1.561 |
| Ctf1          | -0.896 | 7.177  | -5.054 | 0.000 | 0.012 | 1.559 |
| Kdelr1        | 0.900  | 10.376 | 5.053  | 0.000 | 0.012 | 1.557 |
| Nfkbia        | 0.887  | 11.560 | 5.053  | 0.000 | 0.012 | 1.556 |
| Gimap1        | 0.944  | 4.447  | 5.051  | 0.000 | 0.012 | 1.554 |
| Mpz11         | 1.435  | 7.310  | 5.049  | 0.000 | 0.012 | 1.549 |
| Helz          | 1.035  | 6.153  | 5.027  | 0.000 | 0.012 | 1.504 |
| Ythdc1        | 0.824  | 7.920  | 5.025  | 0.000 | 0.012 | 1.500 |
| Tt114         | 0.595  | 6.782  | 5.021  | 0.000 | 0.012 | 1.493 |
| Cdk14         | -1.373 | 6.667  | -5.020 | 0.000 | 0.012 | 1.491 |
| Bcar1         | 0.464  | 8.868  | 5.018  | 0.000 | 0.012 | 1.488 |
| Smpd13b       | 2.828  | 7.869  | 5.016  | 0.000 | 0.012 | 1.484 |
| Kcnip3        | -0.863 | 5.323  | -5.014 | 0.000 | 0.012 | 1.480 |
| Aldh112       | -2.226 | 5.539  | -5.014 | 0.000 | 0.012 | 1.479 |
| Cd82          | 0.680  | 10.835 | 5.011  | 0.000 | 0.012 | 1.472 |
| Lrg1          | 4.570  | 9.169  | 5.009  | 0.000 | 0.012 | 1.468 |
| Osmr          | 3.018  | 7.185  | 5.008  | 0.000 | 0.012 | 1.467 |
| Brd2          | 0.844  | 8.101  | 5.005  | 0.000 | 0.012 | 1.461 |
| Hist3h2a      | -0.517 | 8.046  | -5.001 | 0.000 | 0.012 | 1.453 |
| AI854703      | -0.731 | 4.465  | -4.992 | 0.000 | 0.012 | 1.435 |
| Six4          | -1.132 | 3.921  | -4.990 | 0.000 | 0.012 | 1.432 |
| Glt25d1       | 0.819  | 8.486  | 4.987  | 0.000 | 0.012 | 1.425 |
| Gabbr1        | -0.587 | 4.241  | -4.986 | 0.000 | 0.012 | 1.422 |
| Kremen1       | -0.538 | 3.233  | -4.982 | 0.000 | 0.012 | 1.414 |
| Ivd           | -0.912 | 8.405  | -4.981 | 0.000 | 0.012 | 1.412 |
| Cdk5rap2      | -0.702 | 4.225  | -4.978 | 0.000 | 0.012 | 1.407 |
| AK007819      | -0.773 | 3.344  | -4.973 | 0.000 | 0.012 | 1.396 |
| Prmt1         | 2.521  | 7.264  | 4.966  | 0.000 | 0.012 | 1.383 |
| Hnrnpa2b1     | 0.542  | 10.985 | 4.964  | 0.000 | 0.012 | 1.378 |

|               |        |        |        |       |       |       |
|---------------|--------|--------|--------|-------|-------|-------|
| 4930415020Rik | 1.392  | 7.075  | 4.964  | 0.000 | 0.012 | 1.378 |
| 4833413G10Rik | -0.817 | 4.918  | -4.962 | 0.000 | 0.012 | 1.375 |
| AA467197      | 1.459  | 11.882 | 4.962  | 0.000 | 0.012 | 1.374 |
| Rab6a         | 1.213  | 8.138  | 4.962  | 0.000 | 0.012 | 1.374 |
| Ssh2          | 1.010  | 7.391  | 4.958  | 0.000 | 0.012 | 1.367 |
| Gm15498       | -0.694 | 3.003  | -4.952 | 0.000 | 0.012 | 1.354 |
| Upf3b         | 0.699  | 7.480  | 4.950  | 0.000 | 0.012 | 1.351 |
| Esrrg         | -0.729 | 4.658  | -4.946 | 0.000 | 0.012 | 1.343 |
| Sntb1         | -0.708 | 4.725  | -4.939 | 0.000 | 0.013 | 1.328 |
| Luc713        | 0.777  | 9.590  | 4.937  | 0.000 | 0.013 | 1.325 |
| Pcdhb14       | -0.798 | 2.898  | -4.928 | 0.000 | 0.013 | 1.306 |
| Tspan3        | 0.828  | 9.958  | 4.927  | 0.000 | 0.013 | 1.304 |
| Klk1b16       | -0.463 | 2.547  | -4.912 | 0.000 | 0.013 | 1.275 |
| Cldn8         | -2.666 | 5.027  | -4.911 | 0.000 | 0.013 | 1.272 |
| Cd14          | 2.538  | 8.635  | 4.903  | 0.000 | 0.013 | 1.256 |
| Slc25a29      | -0.679 | 4.777  | -4.898 | 0.000 | 0.013 | 1.245 |
| Ier5          | 0.886  | 7.477  | 4.897  | 0.000 | 0.013 | 1.244 |
| Snrpb2        | 0.609  | 8.841  | 4.891  | 0.000 | 0.013 | 1.232 |
| A530083I20Rik | -0.683 | 3.405  | -4.890 | 0.000 | 0.013 | 1.231 |
| Snhg5         | 1.346  | 6.893  | 4.888  | 0.000 | 0.013 | 1.226 |
| P4htm         | -0.682 | 3.672  | -4.887 | 0.000 | 0.013 | 1.225 |
| Reg3g         | 5.434  | 9.501  | 4.887  | 0.000 | 0.013 | 1.224 |
| Wtip          | 1.206  | 8.943  | 4.886  | 0.000 | 0.013 | 1.221 |
| Snhg6         | 0.684  | 8.327  | 4.885  | 0.000 | 0.013 | 1.219 |
| Prom1         | 1.029  | 12.518 | 4.882  | 0.000 | 0.013 | 1.214 |
| Cyp2s1        | -0.821 | 11.660 | -4.879 | 0.000 | 0.013 | 1.208 |
| Mical1        | 1.447  | 5.027  | 4.877  | 0.000 | 0.013 | 1.205 |
| Atpl3a4       | -0.950 | 3.342  | -4.874 | 0.000 | 0.013 | 1.198 |
| Timp2         | -1.015 | 4.285  | -4.872 | 0.000 | 0.013 | 1.194 |
| Ncl           | 0.884  | 10.952 | 4.867  | 0.000 | 0.013 | 1.184 |
| 2210019G11Rik | -0.565 | 4.670  | -4.865 | 0.000 | 0.013 | 1.179 |
| Igsf11        | -0.533 | 3.191  | -4.863 | 0.000 | 0.013 | 1.176 |
| Spo11         | -0.523 | 3.812  | -4.859 | 0.000 | 0.013 | 1.168 |
| Klh14         | -0.636 | 2.796  | -4.858 | 0.000 | 0.013 | 1.167 |
| C3            | 4.035  | 8.450  | 4.855  | 0.000 | 0.013 | 1.160 |
| Emc1          | 0.620  | 8.405  | 4.855  | 0.000 | 0.013 | 1.160 |
| Mtmr7         | -0.616 | 5.488  | -4.851 | 0.000 | 0.013 | 1.151 |
| Trim8         | 0.559  | 8.457  | 4.850  | 0.000 | 0.013 | 1.149 |
| Adhfe1        | -1.717 | 5.827  | -4.849 | 0.000 | 0.013 | 1.147 |
| Cckbr         | -1.036 | 6.278  | -4.847 | 0.000 | 0.013 | 1.144 |
| Adrala        | -0.792 | 3.734  | -4.847 | 0.000 | 0.013 | 1.143 |
| Ints2         | 0.917  | 7.945  | 4.845  | 0.000 | 0.013 | 1.139 |
| Zan           | -0.824 | 4.248  | -4.842 | 0.000 | 0.013 | 1.132 |
| Snrpe         | 0.571  | 11.113 | 4.836  | 0.000 | 0.013 | 1.121 |
| Midn          | 0.842  | 7.408  | 4.836  | 0.000 | 0.013 | 1.121 |
| Pld3          | -0.632 | 10.227 | -4.827 | 0.000 | 0.013 | 1.103 |
| Rnf169        | 0.716  | 6.569  | 4.822  | 0.000 | 0.013 | 1.092 |
| LOC101243624  | -0.708 | 2.866  | -4.821 | 0.000 | 0.013 | 1.090 |
| Mpc1          | -0.880 | 10.232 | -4.820 | 0.000 | 0.013 | 1.089 |
| Oprm1         | -0.712 | 4.356  | -4.816 | 0.000 | 0.013 | 1.081 |

|               |        |        |        |       |       |       |
|---------------|--------|--------|--------|-------|-------|-------|
| 9030404E10Rik | -0.908 | 3.951  | -4.814 | 0.000 | 0.013 | 1.077 |
| C79206        | -0.682 | 3.856  | -4.814 | 0.000 | 0.013 | 1.076 |
| Csgalnact1    | -0.614 | 2.801  | -4.811 | 0.000 | 0.013 | 1.071 |
| Eef1b2        | 0.550  | 11.970 | 4.809  | 0.000 | 0.013 | 1.067 |
| Hif1a         | 1.310  | 8.063  | 4.809  | 0.000 | 0.013 | 1.067 |
| Setd1b        | 0.900  | 7.669  | 4.808  | 0.000 | 0.013 | 1.065 |
| 2010007H06Rik | 2.038  | 7.682  | 4.807  | 0.000 | 0.013 | 1.063 |
| 4930554H23Rik | -0.742 | 3.557  | -4.806 | 0.000 | 0.013 | 1.061 |
| Rdh10         | 1.503  | 10.174 | 4.804  | 0.000 | 0.013 | 1.057 |
| Uqcrfs1       | -0.645 | 11.122 | -4.804 | 0.000 | 0.013 | 1.056 |
| Adrbk2        | 1.533  | 7.372  | 4.795  | 0.000 | 0.014 | 1.038 |
| Aak1          | -0.889 | 4.670  | -4.792 | 0.000 | 0.014 | 1.032 |
| Ceacam1       | 1.587  | 8.294  | 4.790  | 0.000 | 0.014 | 1.029 |
| Tmem130       | -0.573 | 3.060  | -4.789 | 0.000 | 0.014 | 1.027 |
| Bpifb9b       | -0.554 | 2.538  | -4.789 | 0.000 | 0.014 | 1.025 |
| 2010300F17Rik | -0.619 | 3.023  | -4.783 | 0.000 | 0.014 | 1.015 |
| Sowahb        | 0.884  | 7.993  | 4.774  | 0.000 | 0.014 | 0.996 |
| Pex26         | 0.699  | 7.711  | 4.772  | 0.000 | 0.014 | 0.991 |
| Ceacam1       | 1.287  | 7.962  | 4.769  | 0.000 | 0.014 | 0.986 |
| 4930556A12Rik | -0.738 | 6.144  | -4.765 | 0.000 | 0.014 | 0.977 |
| 1110017D15Rik | -0.804 | 4.451  | -4.764 | 0.000 | 0.014 | 0.975 |
| Cbln3         | -0.761 | 4.468  | -4.761 | 0.000 | 0.014 | 0.970 |
| Perml         | -1.376 | 4.556  | -4.759 | 0.000 | 0.014 | 0.965 |
| LOC102640703  | -0.613 | 3.414  | -4.756 | 0.000 | 0.014 | 0.959 |
| Clec14a       | -0.736 | 4.588  | -4.753 | 0.000 | 0.014 | 0.954 |
| 9430013L17Rik | -0.680 | 3.155  | -4.750 | 0.000 | 0.014 | 0.947 |
| C79744        | -0.588 | 3.023  | -4.749 | 0.000 | 0.014 | 0.945 |
| Laptm4b       | -0.677 | 9.388  | -4.749 | 0.000 | 0.014 | 0.945 |
| 4930544F09Rik | -0.603 | 3.940  | -4.744 | 0.000 | 0.014 | 0.934 |
| Rhot1         | -0.653 | 8.270  | -4.735 | 0.000 | 0.014 | 0.917 |
| C1cn1         | -0.735 | 4.994  | -4.734 | 0.000 | 0.014 | 0.916 |
| Acs11         | -1.627 | 6.553  | -4.734 | 0.000 | 0.014 | 0.915 |
| Necab1        | -2.431 | 3.534  | -4.728 | 0.000 | 0.014 | 0.902 |
| Tmed6         | -2.634 | 9.060  | -4.722 | 0.000 | 0.015 | 0.891 |
| Apobec1       | 1.151  | 8.154  | 4.722  | 0.000 | 0.015 | 0.891 |
| Grk4          | -0.548 | 3.271  | -4.721 | 0.000 | 0.015 | 0.888 |
| Tnfaip3       | 1.431  | 8.156  | 4.715  | 0.000 | 0.015 | 0.877 |
| Dnajc7        | 1.524  | 8.846  | 4.713  | 0.000 | 0.015 | 0.871 |
| Smim5         | -1.804 | 5.444  | -4.708 | 0.000 | 0.015 | 0.863 |
| Dnali1        | -0.647 | 3.826  | -4.708 | 0.000 | 0.015 | 0.862 |
| Ly6d          | 2.542  | 10.970 | 4.707  | 0.000 | 0.015 | 0.861 |
| Cebpb         | 1.415  | 8.232  | 4.707  | 0.000 | 0.015 | 0.861 |
| Gabra4        | -0.855 | 3.791  | -4.704 | 0.000 | 0.015 | 0.854 |
| Ncam2         | -0.925 | 3.131  | -4.703 | 0.000 | 0.015 | 0.853 |
| Tsc2          | -0.617 | 7.347  | -4.699 | 0.000 | 0.015 | 0.844 |
| Edem2         | -0.706 | 8.926  | -4.697 | 0.000 | 0.015 | 0.839 |
| Bhlha9        | -0.662 | 4.192  | -4.695 | 0.000 | 0.015 | 0.836 |
| Efnb2         | 1.535  | 7.457  | 4.691  | 0.000 | 0.015 | 0.829 |
| Ssx2ip        | -1.029 | 6.302  | -4.691 | 0.000 | 0.015 | 0.828 |
| Snhg8         | 0.731  | 8.669  | 4.686  | 0.000 | 0.015 | 0.817 |

|               |        |        |        |       |       |       |
|---------------|--------|--------|--------|-------|-------|-------|
| Rhbd11        | -1.007 | 6.591  | -4.681 | 0.000 | 0.015 | 0.808 |
| Wnt5b         | -0.690 | 3.753  | -4.678 | 0.000 | 0.015 | 0.802 |
| Allc          | -0.648 | 5.107  | -4.677 | 0.000 | 0.015 | 0.798 |
| 4930506C21Rik | -0.509 | 3.843  | -4.672 | 0.000 | 0.015 | 0.789 |
| Nfx11         | 0.579  | 6.740  | 4.671  | 0.000 | 0.015 | 0.787 |
| Capza1        | 0.512  | 10.565 | 4.668  | 0.000 | 0.015 | 0.782 |
| Hrk           | -0.543 | 5.213  | -4.668 | 0.000 | 0.015 | 0.780 |
| Snx17         | 0.610  | 10.910 | 4.665  | 0.000 | 0.015 | 0.775 |
| Cxcl5         | 4.075  | 7.313  | 4.660  | 0.000 | 0.015 | 0.765 |
| Fus           | 2.622  | 7.610  | 4.660  | 0.000 | 0.015 | 0.764 |
| Cd44          | 3.159  | 8.982  | 4.651  | 0.000 | 0.016 | 0.747 |
| Igkv8-30      | 4.284  | 9.644  | 4.650  | 0.000 | 0.016 | 0.744 |
| BC004004      | 1.219  | 8.316  | 4.648  | 0.000 | 0.016 | 0.741 |
| Crebrf        | -1.087 | 5.553  | -4.644 | 0.000 | 0.016 | 0.733 |
| Noc2l         | 0.876  | 6.970  | 4.643  | 0.000 | 0.016 | 0.729 |
| Lrrc56        | -0.584 | 5.426  | -4.640 | 0.000 | 0.016 | 0.723 |
| Hoxc9         | -0.804 | 6.246  | -4.638 | 0.000 | 0.016 | 0.720 |
| Redrum        | -0.437 | 2.728  | -4.628 | 0.000 | 0.016 | 0.700 |
| Sirt2         | -0.890 | 8.528  | -4.626 | 0.000 | 0.016 | 0.696 |
| Cxxc4         | -1.145 | 5.516  | -4.624 | 0.000 | 0.016 | 0.691 |
| Krtap19-4     | -0.502 | 3.710  | -4.621 | 0.000 | 0.016 | 0.686 |
| Flt4          | -0.495 | 5.114  | -4.621 | 0.000 | 0.016 | 0.686 |
| Ehf           | 1.221  | 6.688  | 4.620  | 0.000 | 0.016 | 0.684 |
| 1700016D06Rik | -0.380 | 2.569  | -4.616 | 0.000 | 0.016 | 0.676 |
| Ybx2          | -0.854 | 5.841  | -4.616 | 0.000 | 0.016 | 0.676 |
| 5430416N02Rik | 0.800  | 4.931  | 4.616  | 0.000 | 0.016 | 0.675 |
| 1500012F01Rik | 1.208  | 8.067  | 4.614  | 0.000 | 0.016 | 0.672 |
| Pkdcc         | 1.064  | 6.558  | 4.613  | 0.000 | 0.016 | 0.669 |
| Spn-ps        | -0.746 | 3.498  | -4.610 | 0.000 | 0.016 | 0.663 |
| Rcan2         | -1.200 | 4.297  | -4.603 | 0.000 | 0.016 | 0.649 |
| Lpar6         | 0.511  | 8.026  | 4.601  | 0.000 | 0.016 | 0.644 |
| Zfp235        | -0.736 | 3.734  | -4.600 | 0.000 | 0.016 | 0.642 |
| Zmynd10       | -0.786 | 3.762  | -4.598 | 0.000 | 0.016 | 0.639 |
| Lrrn3         | -1.229 | 3.901  | -4.597 | 0.000 | 0.016 | 0.637 |
| Tmed9         | 0.698  | 10.034 | 4.595  | 0.000 | 0.016 | 0.632 |
| Slc39a4       | 1.110  | 10.044 | 4.593  | 0.000 | 0.016 | 0.628 |
| Il1f10        | -0.552 | 5.500  | -4.590 | 0.000 | 0.016 | 0.622 |
| Hk2           | 1.919  | 9.231  | 4.590  | 0.000 | 0.016 | 0.621 |
| Plekhg6       | -0.776 | 6.718  | -4.588 | 0.000 | 0.016 | 0.618 |
| Gm6682        | -1.202 | 4.908  | -4.587 | 0.000 | 0.016 | 0.616 |
| Cpne7         | -0.705 | 4.386  | -4.579 | 0.000 | 0.016 | 0.601 |
| Sf3b3         | 0.605  | 9.388  | 4.578  | 0.000 | 0.016 | 0.598 |
| Cux1          | -0.877 | 7.131  | -4.575 | 0.000 | 0.016 | 0.592 |
| At12          | 0.836  | 9.817  | 4.575  | 0.000 | 0.016 | 0.592 |
| Gm11545       | 2.371  | 7.282  | 4.573  | 0.000 | 0.016 | 0.588 |
| Colec11       | -0.623 | 4.318  | -4.571 | 0.000 | 0.016 | 0.584 |
| Gm17753       | -0.620 | 4.256  | -4.571 | 0.000 | 0.016 | 0.584 |
| Lrrc10b       | -0.739 | 5.252  | -4.571 | 0.000 | 0.016 | 0.583 |
| Piezol        | 0.972  | 7.518  | 4.569  | 0.000 | 0.017 | 0.579 |
| Klk1b11       | -0.614 | 3.494  | -4.567 | 0.000 | 0.017 | 0.576 |



|               |        |        |        |       |       |       |
|---------------|--------|--------|--------|-------|-------|-------|
| Krr1          | 0.495  | 8.245  | 4.565  | 0.000 | 0.017 | 0.571 |
| Prps2         | -0.971 | 6.758  | -4.561 | 0.000 | 0.017 | 0.563 |
| 4933427J07Rik | -0.609 | 4.215  | -4.555 | 0.000 | 0.017 | 0.551 |
| Glipr1        | 1.439  | 6.362  | 4.554  | 0.000 | 0.017 | 0.548 |
| Hsd17b14      | -0.895 | 4.422  | -4.552 | 0.000 | 0.017 | 0.545 |
| Slc3a2        | -0.695 | 9.896  | -4.550 | 0.000 | 0.017 | 0.540 |
| Ap4e1         | 0.788  | 7.018  | 4.549  | 0.000 | 0.017 | 0.539 |
| Slx1b         | -0.555 | 4.760  | -4.548 | 0.000 | 0.017 | 0.536 |
| A230102021Rik | -0.812 | 3.502  | -4.544 | 0.000 | 0.017 | 0.529 |
| Pbx2          | 0.589  | 7.368  | 4.544  | 0.000 | 0.017 | 0.528 |
| Arpc3         | 1.630  | 10.196 | 4.541  | 0.000 | 0.017 | 0.523 |
| Rusc2         | -0.529 | 6.147  | -4.541 | 0.000 | 0.017 | 0.522 |
| Ccdc109b      | 1.840  | 6.438  | 4.541  | 0.000 | 0.017 | 0.522 |
| Polr3         | 1.009  | 8.166  | 4.539  | 0.000 | 0.017 | 0.518 |
| Kcnd3         | -0.643 | 3.790  | -4.532 | 0.000 | 0.017 | 0.505 |
| Dlgap3        | -0.651 | 5.192  | -4.530 | 0.000 | 0.017 | 0.500 |
| Bcl3          | 1.331  | 8.042  | 4.530  | 0.000 | 0.017 | 0.499 |
| Pkm           | -0.467 | 11.543 | -4.529 | 0.000 | 0.017 | 0.497 |
| Gm2762        | -0.545 | 3.233  | -4.525 | 0.000 | 0.017 | 0.490 |
| Tnpo3         | 0.976  | 8.342  | 4.525  | 0.000 | 0.017 | 0.490 |
| Blmh          | 0.950  | 9.115  | 4.524  | 0.000 | 0.017 | 0.487 |
| Galnt2        | -1.333 | 8.061  | -4.523 | 0.000 | 0.017 | 0.485 |
| Prpf38b       | 1.291  | 8.271  | 4.519  | 0.000 | 0.017 | 0.478 |
| Tmem27        | -0.626 | 2.619  | -4.503 | 0.000 | 0.018 | 0.444 |
| 1700034F02Rik | -0.577 | 2.494  | -4.501 | 0.000 | 0.018 | 0.440 |
| Mesp2         | -0.740 | 5.047  | -4.495 | 0.000 | 0.018 | 0.428 |
| Neu2          | -0.844 | 4.190  | -4.495 | 0.000 | 0.018 | 0.428 |
| Mfsd7b        | -0.672 | 4.315  | -4.494 | 0.000 | 0.018 | 0.427 |
| Serpinalf     | -0.415 | 2.699  | -4.493 | 0.000 | 0.018 | 0.424 |
| Ippk          | 0.768  | 8.910  | 4.493  | 0.000 | 0.018 | 0.423 |
| Haus3         | 0.634  | 6.583  | 4.489  | 0.000 | 0.018 | 0.416 |
| Myh10         | -0.733 | 3.668  | -4.486 | 0.000 | 0.018 | 0.410 |
| Fubp3         | 0.706  | 7.220  | 4.476  | 0.000 | 0.018 | 0.388 |
| Nbeal2        | 0.752  | 8.278  | 4.474  | 0.000 | 0.018 | 0.385 |
| Klf10         | 1.503  | 7.821  | 4.474  | 0.000 | 0.018 | 0.385 |
| Atg13         | -0.513 | 7.195  | -4.470 | 0.000 | 0.018 | 0.378 |
| Zfp90         | -0.865 | 4.689  | -4.470 | 0.000 | 0.018 | 0.377 |
| Cib1          | 0.643  | 5.219  | 4.469  | 0.000 | 0.018 | 0.374 |
| LOC102641923  | 0.740  | 10.158 | 4.459  | 0.000 | 0.019 | 0.355 |
| Nrn1          | -2.389 | 6.750  | -4.454 | 0.000 | 0.019 | 0.345 |
| Tmem89        | -0.639 | 5.765  | -4.451 | 0.000 | 0.019 | 0.338 |
| Cited4        | -0.857 | 7.423  | -4.449 | 0.000 | 0.019 | 0.334 |
| Scn4b         | -1.232 | 4.184  | -4.448 | 0.000 | 0.019 | 0.332 |
| Prickle1      | -0.441 | 3.069  | -4.443 | 0.000 | 0.019 | 0.322 |
| Ingl          | 0.471  | 7.850  | 4.443  | 0.000 | 0.019 | 0.321 |
| Gpx2          | 1.782  | 11.272 | 4.442  | 0.000 | 0.019 | 0.319 |
| Tpcn2         | 0.976  | 5.833  | 4.441  | 0.000 | 0.019 | 0.317 |
| Lgals4        | 1.019  | 11.665 | 4.441  | 0.000 | 0.019 | 0.317 |
| AU015849      | -0.583 | 2.416  | -4.439 | 0.000 | 0.019 | 0.313 |
| Pomgnt2       | -0.566 | 6.732  | -4.438 | 0.000 | 0.019 | 0.311 |

|               |        |        |        |       |       |       |
|---------------|--------|--------|--------|-------|-------|-------|
| Myo19         | -1.022 | 6.710  | -4.434 | 0.000 | 0.019 | 0.303 |
| Bcl6b         | -0.552 | 3.707  | -4.430 | 0.000 | 0.019 | 0.296 |
| I700013D24Rik | -0.688 | 3.003  | -4.429 | 0.000 | 0.019 | 0.294 |
| As3mt         | 1.136  | 6.709  | 4.428  | 0.000 | 0.019 | 0.290 |
| Epha4         | 0.865  | 5.066  | 4.424  | 0.000 | 0.019 | 0.283 |
| Csf1          | -0.563 | 5.989  | -4.421 | 0.000 | 0.019 | 0.277 |
| Ppp2r1b       | -0.983 | 8.910  | -4.421 | 0.000 | 0.019 | 0.276 |
| Rlim          | 0.544  | 8.499  | 4.420  | 0.000 | 0.019 | 0.275 |
| Rnf145        | 1.121  | 7.428  | 4.419  | 0.000 | 0.019 | 0.273 |
| Cd53          | 1.942  | 6.688  | 4.419  | 0.000 | 0.019 | 0.272 |
| Spib          | 1.686  | 6.840  | 4.414  | 0.000 | 0.020 | 0.262 |
| Dmpk          | -0.600 | 3.400  | -4.413 | 0.000 | 0.020 | 0.261 |
| Ccdc71        | 0.913  | 7.536  | 4.409  | 0.000 | 0.020 | 0.253 |
| Gm12854       | 0.744  | 12.472 | 4.406  | 0.000 | 0.020 | 0.247 |
| Kcnq5         | -0.586 | 2.418  | -4.405 | 0.000 | 0.020 | 0.245 |
| Liph          | 1.168  | 6.573  | 4.404  | 0.000 | 0.020 | 0.241 |
| D2Ertd105e    | -0.580 | 3.384  | -4.403 | 0.000 | 0.020 | 0.240 |
| Phgdh         | -0.746 | 8.250  | -4.403 | 0.000 | 0.020 | 0.240 |
| Myof          | 0.915  | 8.161  | 4.403  | 0.000 | 0.020 | 0.240 |
| Sst           | -2.267 | 8.821  | -4.402 | 0.000 | 0.020 | 0.238 |
| Gm15471       | -0.519 | 2.913  | -4.401 | 0.000 | 0.020 | 0.236 |
| Slc6a6        | -0.645 | 5.252  | -4.401 | 0.000 | 0.020 | 0.235 |
| Cldn6         | -0.493 | 4.039  | -4.400 | 0.000 | 0.020 | 0.233 |
| Tmem100       | -0.701 | 3.015  | -4.393 | 0.000 | 0.020 | 0.220 |
| Slc16a4       | -0.690 | 3.570  | -4.391 | 0.000 | 0.020 | 0.214 |
| Eif4h         | 0.544  | 10.758 | 4.388  | 0.000 | 0.020 | 0.209 |
| Cyp4v3        | -1.447 | 5.898  | -4.384 | 0.000 | 0.020 | 0.200 |
| Pygo2         | 0.512  | 8.223  | 4.383  | 0.000 | 0.020 | 0.199 |
| E330013P04Rik | -0.925 | 3.416  | -4.383 | 0.000 | 0.020 | 0.198 |
| 4930404K06Rik | -0.453 | 3.353  | -4.377 | 0.000 | 0.020 | 0.185 |
| Arhgef4       | -2.110 | 6.604  | -4.374 | 0.000 | 0.020 | 0.181 |
| Eprs          | 0.564  | 9.124  | 4.374  | 0.000 | 0.020 | 0.180 |
| Cdc42ep1      | -0.753 | 8.515  | -4.374 | 0.000 | 0.020 | 0.180 |
| 4833418N02Rik | -0.698 | 4.723  | -4.373 | 0.000 | 0.020 | 0.179 |
| Pnpla8        | -0.594 | 8.660  | -4.372 | 0.000 | 0.020 | 0.176 |
| Adk           | -1.075 | 7.708  | -4.370 | 0.000 | 0.020 | 0.172 |
| H60c          | -0.776 | 3.741  | -4.369 | 0.000 | 0.020 | 0.169 |
| Diol          | -1.870 | 5.944  | -4.368 | 0.000 | 0.020 | 0.168 |
| Ceslg         | 2.459  | 6.268  | 4.366  | 0.000 | 0.020 | 0.164 |
| Pick1         | 0.687  | 7.681  | 4.366  | 0.000 | 0.020 | 0.164 |
| Ccdc19        | -1.505 | 5.756  | -4.366 | 0.000 | 0.020 | 0.163 |
| Ankrd9        | -0.595 | 6.549  | -4.362 | 0.000 | 0.020 | 0.156 |
| Tubala        | 0.863  | 8.897  | 4.360  | 0.000 | 0.020 | 0.152 |
| D17H6S56E-5   | 1.613  | 9.156  | 4.360  | 0.000 | 0.020 | 0.151 |
| Fnbp1         | 1.412  | 5.544  | 4.356  | 0.000 | 0.020 | 0.144 |
| Pla2g4a       | 0.726  | 9.362  | 4.356  | 0.000 | 0.020 | 0.144 |
| Akt1s1        | 0.784  | 8.141  | 4.354  | 0.000 | 0.020 | 0.139 |
| Gsdmc         | 1.677  | 7.816  | 4.350  | 0.000 | 0.021 | 0.131 |
| Atp13a2       | -0.467 | 6.801  | -4.349 | 0.000 | 0.021 | 0.130 |
| 5830454E08Rik | -0.520 | 5.318  | -4.349 | 0.000 | 0.021 | 0.128 |

|               |        |        |        |       |       |        |
|---------------|--------|--------|--------|-------|-------|--------|
| Fbxl16        | -0.779 | 5.790  | -4.348 | 0.000 | 0.021 | 0.126  |
| Ssmem1        | -0.654 | 4.329  | -4.347 | 0.000 | 0.021 | 0.124  |
| Flnb          | 1.268  | 10.329 | 4.344  | 0.000 | 0.021 | 0.118  |
| Def8          | -0.677 | 7.046  | -4.341 | 0.000 | 0.021 | 0.112  |
| 5330417H12Rik | -0.592 | 5.269  | -4.340 | 0.000 | 0.021 | 0.110  |
| Atxn713       | 0.565  | 8.167  | 4.339  | 0.000 | 0.021 | 0.109  |
| U2af1         | 0.869  | 8.790  | 4.339  | 0.000 | 0.021 | 0.108  |
| Zfp119b       | -0.660 | 3.829  | -4.332 | 0.000 | 0.021 | 0.095  |
| Plaur         | 2.275  | 8.297  | 4.332  | 0.000 | 0.021 | 0.093  |
| Msx1          | -0.580 | 5.661  | -4.331 | 0.000 | 0.021 | 0.093  |
| Mtcl1         | 0.718  | 7.814  | 4.326  | 0.000 | 0.021 | 0.082  |
| Cdk9          | 0.525  | 9.051  | 4.326  | 0.000 | 0.021 | 0.081  |
| Pate4         | 1.524  | 5.960  | 4.324  | 0.000 | 0.021 | 0.077  |
| Ripply3       | 0.987  | 8.326  | 4.323  | 0.000 | 0.021 | 0.076  |
| Rangap1       | 0.597  | 7.588  | 4.321  | 0.000 | 0.021 | 0.072  |
| Cst11         | -0.524 | 2.582  | -4.320 | 0.000 | 0.021 | 0.068  |
| Litaf         | 0.944  | 9.708  | 4.317  | 0.000 | 0.021 | 0.064  |
| Gm5512        | -0.864 | 6.172  | -4.316 | 0.000 | 0.021 | 0.061  |
| 5430419D17Rik | -0.520 | 3.975  | -4.316 | 0.000 | 0.021 | 0.060  |
| Taslr3        | -0.545 | 5.094  | -4.315 | 0.000 | 0.021 | 0.059  |
| Olfr65        | -0.531 | 3.092  | -4.310 | 0.000 | 0.021 | 0.050  |
| Chd5          | -0.623 | 3.919  | -4.310 | 0.000 | 0.021 | 0.049  |
| Tulp1         | -0.637 | 3.490  | -4.310 | 0.000 | 0.021 | 0.048  |
| 1810010K12Rik | -0.583 | 3.400  | -4.309 | 0.000 | 0.021 | 0.046  |
| Anp32e        | 0.628  | 8.197  | 4.308  | 0.000 | 0.021 | 0.045  |
| Tango6        | -0.664 | 5.877  | -4.307 | 0.000 | 0.021 | 0.042  |
| Rgs7          | -1.794 | 4.686  | -4.305 | 0.000 | 0.021 | 0.038  |
| Runx1t1       | -1.713 | 4.761  | -4.305 | 0.000 | 0.021 | 0.038  |
| Msra          | -0.962 | 8.423  | -4.304 | 0.000 | 0.021 | 0.037  |
| Bnip2         | 1.006  | 7.788  | 4.304  | 0.000 | 0.021 | 0.035  |
| Wisp2         | -0.695 | 4.629  | -4.302 | 0.000 | 0.021 | 0.033  |
| Naip6         | 0.818  | 7.450  | 4.301  | 0.000 | 0.021 | 0.030  |
| Slc13a5       | -0.750 | 5.975  | -4.301 | 0.000 | 0.021 | 0.029  |
| Trrap         | 0.692  | 8.649  | 4.299  | 0.000 | 0.021 | 0.027  |
| Klf15         | -1.382 | 6.727  | -4.299 | 0.000 | 0.021 | 0.027  |
| 4930455J16Rik | -0.701 | 2.684  | -4.298 | 0.000 | 0.021 | 0.023  |
| Il1rap        | -0.642 | 4.249  | -4.296 | 0.000 | 0.021 | 0.020  |
| AK035085      | -0.920 | 3.483  | -4.295 | 0.000 | 0.021 | 0.018  |
| Sema4a        | 0.613  | 8.743  | 4.294  | 0.000 | 0.021 | 0.015  |
| Capn6         | -1.345 | 4.875  | -4.294 | 0.000 | 0.021 | 0.015  |
| Gcn111        | 0.650  | 7.455  | 4.293  | 0.000 | 0.021 | 0.013  |
| Gstm5         | -0.719 | 8.989  | -4.292 | 0.000 | 0.021 | 0.011  |
| 4930483C01Rik | -0.606 | 3.244  | -4.291 | 0.000 | 0.021 | 0.010  |
| Rims3         | -0.536 | 4.164  | -4.291 | 0.000 | 0.021 | 0.009  |
| Cd59a         | -1.147 | 6.992  | -4.285 | 0.000 | 0.021 | -0.004 |
| Dmtn          | -0.634 | 2.558  | -4.283 | 0.000 | 0.021 | -0.007 |
| Emb           | 1.468  | 6.606  | 4.283  | 0.000 | 0.021 | -0.007 |
| P2rx3         | -0.654 | 4.444  | -4.281 | 0.000 | 0.021 | -0.011 |
| Man2b1        | -0.463 | 9.783  | -4.281 | 0.000 | 0.021 | -0.011 |
| Tor1a         | 0.621  | 6.949  | 4.280  | 0.000 | 0.021 | -0.013 |

|               |        |        |        |       |       |        |
|---------------|--------|--------|--------|-------|-------|--------|
| Cks1b         | 1.384  | 9.988  | 4.279  | 0.000 | 0.021 | -0.014 |
| Phyh          | -1.290 | 10.738 | -4.277 | 0.000 | 0.021 | -0.019 |
| Vnn1          | 4.943  | 7.913  | 4.277  | 0.000 | 0.021 | -0.019 |
| Pik3r5        | 1.760  | 5.668  | 4.276  | 0.000 | 0.021 | -0.021 |
| Tmem45b       | 0.857  | 11.303 | 4.276  | 0.000 | 0.021 | -0.021 |
| Khdrbs3       | -0.913 | 5.043  | -4.275 | 0.000 | 0.021 | -0.023 |
| Setd7         | -0.693 | 3.245  | -4.274 | 0.000 | 0.021 | -0.025 |
| Dnajc22       | 0.572  | 7.548  | 4.274  | 0.000 | 0.021 | -0.025 |
| Hpcal1        | -0.518 | 10.125 | -4.274 | 0.000 | 0.021 | -0.026 |
| Txndc2        | -0.567 | 3.926  | -4.273 | 0.000 | 0.021 | -0.028 |
| Phldb2        | 0.885  | 8.618  | 4.272  | 0.000 | 0.021 | -0.029 |
| Rdh14         | -0.770 | 8.290  | -4.272 | 0.000 | 0.021 | -0.030 |
| I122ra1       | 1.685  | 5.341  | 4.271  | 0.000 | 0.021 | -0.031 |
| Fbxo33        | 0.624  | 8.087  | 4.268  | 0.001 | 0.021 | -0.037 |
| Mall          | 1.344  | 6.078  | 4.267  | 0.001 | 0.021 | -0.040 |
| Bclaf1        | 0.771  | 7.116  | 4.264  | 0.001 | 0.021 | -0.045 |
| 1600022D10Rik | -0.583 | 3.235  | -4.263 | 0.001 | 0.021 | -0.048 |
| Muc1          | 0.452  | 11.991 | 4.262  | 0.001 | 0.021 | -0.050 |
| A430091L06Rik | -0.470 | 2.915  | -4.262 | 0.001 | 0.021 | -0.051 |
| Mag           | -0.579 | 4.805  | -4.261 | 0.001 | 0.021 | -0.051 |
| Sh3kbp1       | 1.515  | 6.627  | 4.261  | 0.001 | 0.021 | -0.052 |
| Mip           | -0.681 | 3.825  | -4.259 | 0.001 | 0.021 | -0.056 |
| Ttc7b         | -1.638 | 4.268  | -4.257 | 0.001 | 0.022 | -0.060 |
| Bcl9          | 0.690  | 6.973  | 4.253  | 0.001 | 0.022 | -0.069 |
| Ccser2        | -0.555 | 6.369  | -4.251 | 0.001 | 0.022 | -0.073 |
| Mllt4         | -0.544 | 4.199  | -4.251 | 0.001 | 0.022 | -0.074 |
| Gjal          | 1.387  | 6.723  | 4.247  | 0.001 | 0.022 | -0.082 |
| Hdac3         | 0.602  | 8.555  | 4.245  | 0.001 | 0.022 | -0.084 |
| Man1a         | -1.045 | 9.028  | -4.245 | 0.001 | 0.022 | -0.086 |
| Bccip         | 0.530  | 9.343  | 4.243  | 0.001 | 0.022 | -0.088 |
| Slc4a1        | -0.736 | 3.005  | -4.243 | 0.001 | 0.022 | -0.089 |
| Tnk2          | 0.775  | 10.226 | 4.243  | 0.001 | 0.022 | -0.090 |
| Dhx32         | -0.460 | 8.709  | -4.238 | 0.001 | 0.022 | -0.100 |
| Fzd8          | -0.801 | 5.771  | -4.236 | 0.001 | 0.022 | -0.103 |
| Cfb           | 2.514  | 7.015  | 4.235  | 0.001 | 0.022 | -0.106 |
| Ccng1         | -0.611 | 9.233  | -4.233 | 0.001 | 0.022 | -0.109 |
| AK048274      | -0.617 | 4.202  | -4.232 | 0.001 | 0.022 | -0.112 |
| Neur11a       | -0.641 | 5.496  | -4.231 | 0.001 | 0.022 | -0.115 |
| AU022706      | -0.579 | 2.507  | -4.230 | 0.001 | 0.022 | -0.117 |
| Ctif          | -0.368 | 6.099  | -4.229 | 0.001 | 0.022 | -0.117 |
| 1700086006Rik | -0.929 | 3.555  | -4.229 | 0.001 | 0.022 | -0.119 |
| Ppan          | 0.822  | 6.984  | 4.228  | 0.001 | 0.022 | -0.119 |
| Ptchd3        | -0.486 | 2.931  | -4.225 | 0.001 | 0.022 | -0.126 |
| I118          | -0.717 | 10.787 | -4.225 | 0.001 | 0.022 | -0.126 |
| Uggt1         | -0.468 | 4.073  | -4.225 | 0.001 | 0.022 | -0.127 |
| Dtd1          | -0.499 | 3.311  | -4.224 | 0.001 | 0.022 | -0.128 |
| Trim16        | -0.584 | 7.647  | -4.224 | 0.001 | 0.022 | -0.128 |
| Ptpn2         | 1.730  | 9.489  | 4.224  | 0.001 | 0.022 | -0.129 |
| Hmgn3         | 0.623  | 7.384  | 4.224  | 0.001 | 0.022 | -0.129 |
| Acadm         | -0.870 | 9.613  | -4.223 | 0.001 | 0.022 | -0.131 |

|               |        |        |        |       |       |        |
|---------------|--------|--------|--------|-------|-------|--------|
| Cxcl12        | -1.320 | 5.280  | -4.220 | 0.001 | 0.022 | -0.136 |
| Aspa          | 1.367  | 6.709  | 4.220  | 0.001 | 0.022 | -0.137 |
| Zkscan4       | -0.592 | 4.267  | -4.220 | 0.001 | 0.022 | -0.137 |
| Tcf15         | -0.714 | 5.238  | -4.220 | 0.001 | 0.022 | -0.137 |
| Qsox2         | -0.854 | 6.025  | -4.219 | 0.001 | 0.022 | -0.139 |
| Arf6          | 0.498  | 11.408 | 4.219  | 0.001 | 0.022 | -0.139 |
| 5730422E09Rik | -0.520 | 3.897  | -4.218 | 0.001 | 0.022 | -0.142 |
| Hnrnpul2      | 0.943  | 7.718  | 4.215  | 0.001 | 0.022 | -0.147 |
| Rai2          | -0.814 | 2.496  | -4.212 | 0.001 | 0.022 | -0.152 |
| Esyt3         | -0.942 | 5.732  | -4.212 | 0.001 | 0.022 | -0.154 |
| Casr          | -0.712 | 5.183  | -4.211 | 0.001 | 0.022 | -0.155 |
| Synpo         | -0.461 | 4.297  | -4.211 | 0.001 | 0.022 | -0.155 |
| Adamts8       | -0.616 | 5.882  | -4.206 | 0.001 | 0.022 | -0.165 |
| D130052B06Rik | -0.643 | 2.951  | -4.206 | 0.001 | 0.022 | -0.166 |
| Scnn1g        | 1.244  | 6.612  | 4.203  | 0.001 | 0.022 | -0.172 |
| Maats1        | -0.654 | 3.251  | -4.201 | 0.001 | 0.022 | -0.175 |
| Prss3         | -0.690 | 2.810  | -4.200 | 0.001 | 0.022 | -0.178 |
| Cxcr4         | 1.387  | 4.602  | 4.199  | 0.001 | 0.022 | -0.179 |
| Ercc8         | 0.603  | 5.675  | 4.198  | 0.001 | 0.022 | -0.182 |
| 4933412A08Rik | -0.631 | 2.812  | -4.198 | 0.001 | 0.022 | -0.182 |
| Gm12816       | 1.773  | 6.376  | 4.197  | 0.001 | 0.022 | -0.184 |
| Chd8          | 0.915  | 8.545  | 4.194  | 0.001 | 0.023 | -0.190 |
| Wnt7a         | -0.510 | 4.099  | -4.193 | 0.001 | 0.023 | -0.192 |
| Ak2           | 0.662  | 9.640  | 4.193  | 0.001 | 0.023 | -0.193 |
| Ap5s1         | -0.549 | 6.983  | -4.193 | 0.001 | 0.023 | -0.193 |
| Trnaulap      | 0.543  | 6.343  | 4.191  | 0.001 | 0.023 | -0.196 |
| Bag5          | -0.495 | 4.554  | -4.189 | 0.001 | 0.023 | -0.201 |
| Jazf1         | -0.572 | 3.348  | -4.189 | 0.001 | 0.023 | -0.201 |
| Srebf2        | 0.688  | 8.666  | 4.188  | 0.001 | 0.023 | -0.202 |
| Sema3g        | -0.704 | 3.777  | -4.185 | 0.001 | 0.023 | -0.210 |
| 1700011M02Rik | -0.624 | 3.160  | -4.184 | 0.001 | 0.023 | -0.211 |
| 4930512H18Rik | -0.700 | 3.141  | -4.180 | 0.001 | 0.023 | -0.219 |
| Pi15          | -0.619 | 3.731  | -4.180 | 0.001 | 0.023 | -0.219 |
| Weel1         | -0.826 | 8.217  | -4.179 | 0.001 | 0.023 | -0.222 |
| 2610007B07Rik | -0.594 | 2.900  | -4.178 | 0.001 | 0.023 | -0.222 |
| Slc7a6os      | 0.808  | 5.753  | 4.178  | 0.001 | 0.023 | -0.224 |
| Retsat        | -1.326 | 8.226  | -4.175 | 0.001 | 0.023 | -0.230 |
| Ung           | 0.831  | 6.305  | 4.174  | 0.001 | 0.023 | -0.231 |
| Adamts6       | -0.457 | 3.125  | -4.174 | 0.001 | 0.023 | -0.232 |
| Hoxb13        | -0.555 | 3.939  | -4.172 | 0.001 | 0.023 | -0.235 |
| Reg1          | 5.096  | 7.999  | 4.172  | 0.001 | 0.023 | -0.236 |
| Cldn7         | 3.801  | 8.074  | 4.169  | 0.001 | 0.023 | -0.242 |
| Brpf1         | 0.922  | 8.165  | 4.162  | 0.001 | 0.023 | -0.256 |
| Tinag         | -1.287 | 6.146  | -4.162 | 0.001 | 0.023 | -0.256 |
| Dhx9          | 1.356  | 5.792  | 4.161  | 0.001 | 0.023 | -0.258 |
| Kctd5         | 0.750  | 7.947  | 4.161  | 0.001 | 0.023 | -0.259 |
| Hoxc13        | -0.560 | 3.889  | -4.160 | 0.001 | 0.023 | -0.260 |
| Mfge8         | 0.795  | 10.105 | 4.160  | 0.001 | 0.023 | -0.260 |
| Slco6c1       | -0.699 | 4.098  | -4.158 | 0.001 | 0.023 | -0.264 |
| Syngn2        | 0.379  | 11.029 | 4.154  | 0.001 | 0.023 | -0.272 |

|               |        |        |        |       |       |        |
|---------------|--------|--------|--------|-------|-------|--------|
| Rplp2         | 0.507  | 13.196 | 4.154  | 0.001 | 0.023 | -0.273 |
| 4930544G11Rik | -0.560 | 2.980  | -4.153 | 0.001 | 0.023 | -0.274 |
| B4galnt2      | -1.709 | 5.027  | -4.153 | 0.001 | 0.023 | -0.274 |
| Ppp3cc        | -0.940 | 4.045  | -4.153 | 0.001 | 0.023 | -0.276 |
| Esyt2         | 0.631  | 7.676  | 4.152  | 0.001 | 0.023 | -0.276 |
| Raplgap2      | -1.297 | 9.000  | -4.152 | 0.001 | 0.023 | -0.277 |
| Pfkm          | -0.740 | 7.474  | -4.150 | 0.001 | 0.023 | -0.281 |
| Brms11        | -0.875 | 6.602  | -4.149 | 0.001 | 0.023 | -0.282 |
| Gucyla3       | -0.649 | 3.805  | -4.149 | 0.001 | 0.023 | -0.282 |
| Cyp2u1        | -0.868 | 3.491  | -4.149 | 0.001 | 0.023 | -0.283 |
| Ppargc1a      | -1.954 | 5.302  | -4.149 | 0.001 | 0.023 | -0.283 |
| Bckdhb        | -1.389 | 8.340  | -4.149 | 0.001 | 0.023 | -0.284 |
| Armcx5        | -0.502 | 2.806  | -4.147 | 0.001 | 0.023 | -0.286 |
| Usp46         | -0.732 | 7.204  | -4.147 | 0.001 | 0.023 | -0.287 |
| Copz1         | -0.738 | 6.967  | -4.146 | 0.001 | 0.023 | -0.290 |
| Camk2b        | -0.718 | 4.348  | -4.141 | 0.001 | 0.024 | -0.299 |
| Zfp354b       | -0.592 | 3.135  | -4.140 | 0.001 | 0.024 | -0.301 |
| Plcx3         | -0.461 | 2.523  | -4.140 | 0.001 | 0.024 | -0.302 |
| 9130015G15Rik | -0.645 | 3.010  | -4.136 | 0.001 | 0.024 | -0.310 |
| Zfp735        | -0.464 | 2.394  | -4.135 | 0.001 | 0.024 | -0.312 |
| Slc38a5       | -1.958 | 5.842  | -4.133 | 0.001 | 0.024 | -0.315 |
| 2610018G03Rik | -0.869 | 4.350  | -4.132 | 0.001 | 0.024 | -0.318 |
| Mapkapk5      | 0.431  | 7.806  | 4.130  | 0.001 | 0.024 | -0.322 |
| C230035I16Rik | -0.489 | 4.031  | -4.129 | 0.001 | 0.024 | -0.323 |
| Act17a        | -0.661 | 4.749  | -4.129 | 0.001 | 0.024 | -0.324 |
| Fam43a        | -0.982 | 7.111  | -4.129 | 0.001 | 0.024 | -0.324 |
| 1200014J11Rik | 0.527  | 7.108  | 4.127  | 0.001 | 0.024 | -0.329 |
| Dct           | -0.652 | 3.429  | -4.127 | 0.001 | 0.024 | -0.329 |
| Ntm           | -0.479 | 2.578  | -4.126 | 0.001 | 0.024 | -0.330 |
| 1700034G24Rik | -0.570 | 3.779  | -4.125 | 0.001 | 0.024 | -0.332 |
| Fam19a5       | -0.634 | 4.475  | -4.125 | 0.001 | 0.024 | -0.333 |
| Ndufc2        | -0.743 | 3.980  | -4.125 | 0.001 | 0.024 | -0.333 |
| 9430063H18Rik | -0.472 | 3.280  | -4.124 | 0.001 | 0.024 | -0.334 |
| Bmpr2         | -0.751 | 4.801  | -4.124 | 0.001 | 0.024 | -0.334 |
| Map9          | -0.536 | 4.160  | -4.124 | 0.001 | 0.024 | -0.335 |
| Kctd12        | 1.449  | 6.968  | 4.123  | 0.001 | 0.024 | -0.336 |
| Plcb3         | 0.420  | 7.440  | 4.123  | 0.001 | 0.024 | -0.337 |
| Banf2         | -0.656 | 4.590  | -4.123 | 0.001 | 0.024 | -0.337 |
| Epha8         | -0.703 | 4.437  | -4.122 | 0.001 | 0.024 | -0.340 |
| Lrfn3         | 0.664  | 5.611  | 4.120  | 0.001 | 0.024 | -0.342 |
| Ier3          | 1.027  | 8.720  | 4.118  | 0.001 | 0.024 | -0.346 |
| Cenpe         | 1.019  | 7.392  | 4.117  | 0.001 | 0.024 | -0.350 |
| Gsdmd         | 1.774  | 9.191  | 4.108  | 0.001 | 0.024 | -0.367 |
| Tcta          | -0.838 | 8.302  | -4.106 | 0.001 | 0.024 | -0.371 |
| D12Ert216e    | -0.717 | 5.095  | -4.105 | 0.001 | 0.024 | -0.373 |
| Mkln1         | -0.421 | 8.449  | -4.105 | 0.001 | 0.024 | -0.373 |
| Ppp1r8        | 0.678  | 8.185  | 4.104  | 0.001 | 0.024 | -0.375 |
| Gtf3c4        | 0.577  | 7.197  | 4.102  | 0.001 | 0.024 | -0.381 |
| Clca1         | 2.167  | 6.106  | 4.098  | 0.001 | 0.025 | -0.389 |
| Acot7         | 0.780  | 8.346  | 4.096  | 0.001 | 0.025 | -0.392 |

|               |        |        |        |       |       |        |
|---------------|--------|--------|--------|-------|-------|--------|
| 4833439L19Rik | -1.218 | 6.000  | -4.095 | 0.001 | 0.025 | -0.394 |
| Ttc30b        | -1.546 | 6.668  | -4.095 | 0.001 | 0.025 | -0.395 |
| Gm14019       | -0.581 | 3.234  | -4.094 | 0.001 | 0.025 | -0.396 |
| Olfm4         | 2.153  | 7.212  | 4.094  | 0.001 | 0.025 | -0.397 |
| Blnk          | 0.842  | 7.730  | 4.092  | 0.001 | 0.025 | -0.400 |
| 1110008E08Rik | -0.506 | 4.566  | -4.091 | 0.001 | 0.025 | -0.402 |
| Tmprss13      | -1.047 | 4.556  | -4.088 | 0.001 | 0.025 | -0.409 |
| Mthfd2        | 0.548  | 8.040  | 4.084  | 0.001 | 0.025 | -0.417 |
| Gpx6          | -0.547 | 4.478  | -4.082 | 0.001 | 0.025 | -0.421 |
| 2210018M11Rik | 1.262  | 5.795  | 4.080  | 0.001 | 0.025 | -0.425 |
| Degs1         | -0.956 | 9.305  | -4.080 | 0.001 | 0.025 | -0.426 |
| Elk3          | -0.516 | 3.630  | -4.080 | 0.001 | 0.025 | -0.426 |
| Cml1          | -1.275 | 5.344  | -4.079 | 0.001 | 0.025 | -0.427 |
| 5730521K06Rik | -0.614 | 3.762  | -4.079 | 0.001 | 0.025 | -0.427 |
| Vps36         | -0.769 | 5.278  | -4.078 | 0.001 | 0.025 | -0.430 |
| A930009L07Rik | -0.605 | 2.796  | -4.077 | 0.001 | 0.025 | -0.432 |
| Fbxo10        | -0.559 | 6.487  | -4.077 | 0.001 | 0.025 | -0.432 |
| Amh           | -0.781 | 5.809  | -4.075 | 0.001 | 0.025 | -0.436 |
| Hmha1         | 0.687  | 5.285  | 4.074  | 0.001 | 0.025 | -0.437 |
| Coro2a        | 0.659  | 8.567  | 4.069  | 0.001 | 0.025 | -0.448 |
| Prkci         | 0.365  | 9.512  | 4.069  | 0.001 | 0.025 | -0.449 |
| Dscam         | -0.547 | 4.553  | -4.068 | 0.001 | 0.025 | -0.450 |
| Tbc1d9        | -0.930 | 4.793  | -4.067 | 0.001 | 0.025 | -0.452 |
| Hepacam2      | 0.980  | 5.712  | 4.067  | 0.001 | 0.025 | -0.453 |
| Pdap1         | 0.484  | 9.371  | 4.060  | 0.001 | 0.026 | -0.467 |
| Tomm20        | 0.520  | 11.088 | 4.058  | 0.001 | 0.026 | -0.471 |
| Rnf13         | -1.013 | 7.014  | -4.057 | 0.001 | 0.026 | -0.472 |
| Slc15a4       | -0.582 | 2.841  | -4.056 | 0.001 | 0.026 | -0.474 |
| Fat1          | 0.611  | 10.487 | 4.056  | 0.001 | 0.026 | -0.476 |
| Ldlrad3       | -1.040 | 6.297  | -4.055 | 0.001 | 0.026 | -0.477 |
| Slc25a34      | -1.198 | 6.050  | -4.054 | 0.001 | 0.026 | -0.478 |
| Coro1a        | 2.384  | 7.054  | 4.053  | 0.001 | 0.026 | -0.482 |
| Dnm11         | -0.441 | 2.232  | -4.053 | 0.001 | 0.026 | -0.482 |
| Rbm38         | 0.490  | 6.684  | 4.052  | 0.001 | 0.026 | -0.483 |
| Trim59        | 1.035  | 6.335  | 4.051  | 0.001 | 0.026 | -0.485 |
| Kbtbd4        | -0.602 | 6.225  | -4.051 | 0.001 | 0.026 | -0.485 |
| Adck2         | -0.608 | 5.831  | -4.050 | 0.001 | 0.026 | -0.487 |
| Kcnj3         | -0.470 | 4.942  | -4.050 | 0.001 | 0.026 | -0.488 |
| Gm5126        | -0.528 | 3.845  | -4.048 | 0.001 | 0.026 | -0.492 |
| Klhdc1        | -1.114 | 5.728  | -4.047 | 0.001 | 0.026 | -0.494 |
| Zfp652os      | -0.719 | 3.689  | -4.047 | 0.001 | 0.026 | -0.494 |
| Gm9905        | -0.522 | 4.851  | -4.041 | 0.001 | 0.026 | -0.506 |
| Syt11         | -0.739 | 7.888  | -4.040 | 0.001 | 0.026 | -0.508 |
| Morc3         | 1.063  | 7.233  | 4.039  | 0.001 | 0.026 | -0.511 |
| Slpr5         | -1.473 | 3.618  | -4.036 | 0.001 | 0.026 | -0.516 |
| Grid1         | -0.515 | 3.832  | -4.032 | 0.001 | 0.026 | -0.524 |
| Cabin1        | 0.476  | 7.210  | 4.031  | 0.001 | 0.026 | -0.526 |
| Grhl1         | -0.491 | 6.945  | -4.030 | 0.001 | 0.026 | -0.528 |
| Tom1          | -0.824 | 7.501  | -4.030 | 0.001 | 0.026 | -0.529 |
| Gm10505       | -0.577 | 4.434  | -4.030 | 0.001 | 0.026 | -0.530 |

|               |        |        |        |       |       |        |
|---------------|--------|--------|--------|-------|-------|--------|
| Fth1          | -0.631 | 12.376 | -4.029 | 0.001 | 0.026 | -0.531 |
| Unc5d         | -0.628 | 2.735  | -4.028 | 0.001 | 0.026 | -0.532 |
| Enho          | -0.636 | 5.368  | -4.028 | 0.001 | 0.026 | -0.533 |
| Vegfc         | -0.446 | 2.721  | -4.028 | 0.001 | 0.026 | -0.533 |
| Rfp14b        | -0.583 | 4.052  | -4.025 | 0.001 | 0.026 | -0.540 |
| Nop58         | 0.879  | 7.676  | 4.024  | 0.001 | 0.027 | -0.542 |
| Nrsn2         | -0.650 | 4.616  | -4.021 | 0.001 | 0.027 | -0.547 |
| Foxp2         | -0.874 | 4.192  | -4.021 | 0.001 | 0.027 | -0.547 |
| Ptms          | -0.614 | 9.863  | -4.020 | 0.001 | 0.027 | -0.550 |
| Myb           | 1.322  | 6.613  | 4.018  | 0.001 | 0.027 | -0.553 |
| 1200007C13Rik | -0.754 | 4.253  | -4.017 | 0.001 | 0.027 | -0.555 |
| Osgin2        | -0.776 | 5.167  | -4.015 | 0.001 | 0.027 | -0.560 |
| Prm2          | -0.636 | 5.062  | -4.013 | 0.001 | 0.027 | -0.565 |
| Auh           | -1.207 | 7.976  | -4.011 | 0.001 | 0.027 | -0.568 |
| Mogs          | 0.615  | 9.268  | 4.007  | 0.001 | 0.027 | -0.576 |
| Rpl2211       | 0.405  | 11.383 | 4.007  | 0.001 | 0.027 | -0.576 |
| Zfp449        | -0.466 | 3.612  | -4.005 | 0.001 | 0.027 | -0.581 |
| Lmbrd1        | -0.645 | 6.593  | -4.004 | 0.001 | 0.027 | -0.583 |
| 1600012H06Rik | -0.604 | 7.265  | -4.001 | 0.001 | 0.027 | -0.590 |
| 1700012015Rik | -0.525 | 3.650  | -3.996 | 0.001 | 0.028 | -0.599 |
| Pkd112        | -0.521 | 3.353  | -3.996 | 0.001 | 0.028 | -0.600 |
| LOC102639714  | -0.660 | 2.944  | -3.992 | 0.001 | 0.028 | -0.606 |
| 1110025L11Rik | -0.566 | 2.902  | -3.992 | 0.001 | 0.028 | -0.607 |
| Abca2         | -0.596 | 5.786  | -3.991 | 0.001 | 0.028 | -0.609 |
| Cd74          | 3.993  | 11.547 | 3.990  | 0.001 | 0.028 | -0.611 |
| Klklb8        | -0.540 | 3.438  | -3.990 | 0.001 | 0.028 | -0.612 |
| Akr1b8        | 1.112  | 11.409 | 3.989  | 0.001 | 0.028 | -0.614 |
| Ptpn18        | 0.754  | 8.710  | 3.987  | 0.001 | 0.028 | -0.617 |
| Bzw2          | 0.858  | 8.494  | 3.987  | 0.001 | 0.028 | -0.618 |
| Dnah12        | -0.474 | 3.139  | -3.986 | 0.001 | 0.028 | -0.619 |
| Atf4          | 0.906  | 8.397  | 3.982  | 0.001 | 0.028 | -0.628 |
| 9530046B11Rik | -0.514 | 2.916  | -3.982 | 0.001 | 0.028 | -0.628 |
| 2010308F09Rik | -0.534 | 3.378  | -3.981 | 0.001 | 0.028 | -0.631 |
| Otoa          | -0.404 | 3.581  | -3.980 | 0.001 | 0.028 | -0.633 |
| Hadhb         | -0.479 | 10.749 | -3.979 | 0.001 | 0.028 | -0.633 |
| 4933411K20Rik | -0.577 | 2.709  | -3.979 | 0.001 | 0.028 | -0.634 |
| Sugct         | -0.455 | 2.714  | -3.978 | 0.001 | 0.028 | -0.636 |
| Gm5802        | -0.786 | 5.149  | -3.977 | 0.001 | 0.028 | -0.637 |
| Ulk1          | -0.791 | 5.539  | -3.976 | 0.001 | 0.028 | -0.640 |
| Ech1          | -0.682 | 10.404 | -3.976 | 0.001 | 0.028 | -0.640 |
| Rhobtb1       | -0.837 | 6.507  | -3.975 | 0.001 | 0.028 | -0.643 |
| Ntf3          | -1.002 | 3.396  | -3.974 | 0.001 | 0.028 | -0.644 |
| Fbxo24        | -0.489 | 4.903  | -3.971 | 0.001 | 0.028 | -0.651 |
| Ucp2          | -0.498 | 12.089 | -3.970 | 0.001 | 0.028 | -0.653 |
| Thtpa         | -0.618 | 5.345  | -3.969 | 0.001 | 0.028 | -0.655 |
| Dusp26        | -0.588 | 3.842  | -3.965 | 0.001 | 0.029 | -0.664 |
| Cyp4f15       | -0.644 | 4.700  | -3.964 | 0.001 | 0.029 | -0.665 |
| Pdela         | -0.525 | 2.686  | -3.963 | 0.001 | 0.029 | -0.666 |
| Foxa1         | 0.488  | 11.696 | 3.962  | 0.001 | 0.029 | -0.670 |
| Krt34         | -0.530 | 3.219  | -3.961 | 0.001 | 0.029 | -0.670 |



|               |        |        |        |       |       |        |
|---------------|--------|--------|--------|-------|-------|--------|
| Fam169a       | -0.602 | 3.031  | -3.961 | 0.001 | 0.029 | -0.671 |
| Sox2          | 0.810  | 8.072  | 3.959  | 0.001 | 0.029 | -0.674 |
| Elov16        | 1.049  | 7.536  | 3.959  | 0.001 | 0.029 | -0.676 |
| Cpne2         | 0.712  | 6.420  | 3.958  | 0.001 | 0.029 | -0.677 |
| Ppp1r2-ps9    | -0.642 | 4.323  | -3.958 | 0.001 | 0.029 | -0.677 |
| Ccdc96        | -0.589 | 3.003  | -3.958 | 0.001 | 0.029 | -0.678 |
| Psd3          | -0.982 | 7.220  | -3.957 | 0.001 | 0.029 | -0.680 |
| 4933404012Rik | -0.695 | 4.390  | -3.956 | 0.001 | 0.029 | -0.681 |
| Hdgf          | 0.935  | 8.471  | 3.956  | 0.001 | 0.029 | -0.681 |
| 4930557J02Rik | -0.495 | 3.211  | -3.956 | 0.001 | 0.029 | -0.681 |
| Akt2          | -1.071 | 6.131  | -3.953 | 0.001 | 0.029 | -0.687 |
| Ccp110        | 0.533  | 5.020  | 3.952  | 0.001 | 0.029 | -0.690 |
| Kdm8          | -0.476 | 5.240  | -3.951 | 0.001 | 0.029 | -0.693 |
| Plekhh1       | -1.434 | 7.034  | -3.949 | 0.001 | 0.029 | -0.696 |
| Dgkb          | -0.627 | 4.344  | -3.947 | 0.001 | 0.029 | -0.701 |
| Sgk1          | -2.046 | 8.874  | -3.945 | 0.001 | 0.029 | -0.705 |
| Arhgap33      | -0.618 | 3.455  | -3.942 | 0.001 | 0.029 | -0.710 |
| 1110020A21Rik | -0.696 | 4.750  | -3.942 | 0.001 | 0.029 | -0.711 |
| Vav1          | 0.879  | 4.107  | 3.941  | 0.001 | 0.029 | -0.712 |
| Rgs13         | 1.869  | 7.424  | 3.940  | 0.001 | 0.029 | -0.715 |
| Grn           | 0.678  | 10.536 | 3.937  | 0.001 | 0.029 | -0.721 |
| Tuba4a        | 0.458  | 12.352 | 3.937  | 0.001 | 0.029 | -0.722 |
| Slc48a1       | -0.585 | 7.488  | -3.935 | 0.001 | 0.029 | -0.725 |
| Prss30        | -0.597 | 3.626  | -3.934 | 0.001 | 0.029 | -0.728 |
| Epcam         | 1.131  | 10.642 | 3.933  | 0.001 | 0.029 | -0.730 |
| Atpl3a1       | 0.430  | 8.911  | 3.932  | 0.001 | 0.029 | -0.730 |
| Stac2         | -0.706 | 3.408  | -3.932 | 0.001 | 0.029 | -0.731 |
| Ptcra         | -0.634 | 4.219  | -3.931 | 0.001 | 0.029 | -0.733 |
| Sfxn4         | -0.540 | 4.085  | -3.930 | 0.001 | 0.029 | -0.735 |
| Grifin        | -0.454 | 3.973  | -3.929 | 0.001 | 0.029 | -0.737 |
| 1700123K08Rik | -0.590 | 3.098  | -3.929 | 0.001 | 0.029 | -0.738 |
| Syne1         | -0.516 | 4.929  | -3.928 | 0.001 | 0.029 | -0.740 |
| Papola        | -0.712 | 7.909  | -3.927 | 0.001 | 0.029 | -0.741 |
| Srgn          | 1.596  | 8.656  | 3.924  | 0.001 | 0.030 | -0.747 |
| Gm21596       | 0.420  | 10.143 | 3.924  | 0.001 | 0.030 | -0.748 |
| A930035D04Rik | -0.689 | 3.706  | -3.923 | 0.001 | 0.030 | -0.749 |
| Pabpc1        | 0.476  | 12.389 | 3.923  | 0.001 | 0.030 | -0.750 |
| Spata511      | 1.136  | 3.580  | 3.921  | 0.001 | 0.030 | -0.754 |
| C030046M01Rik | -0.451 | 2.289  | -3.920 | 0.001 | 0.030 | -0.755 |
| Tmem231       | -0.378 | 5.289  | -3.920 | 0.001 | 0.030 | -0.756 |
| Tmem64        | -1.995 | 6.877  | -3.920 | 0.001 | 0.030 | -0.757 |
| Gif           | -1.654 | 11.801 | -3.920 | 0.001 | 0.030 | -0.757 |
| 6720468P15Rik | -1.243 | 5.081  | -3.918 | 0.001 | 0.030 | -0.760 |
| Msrb2         | -1.158 | 5.504  | -3.916 | 0.001 | 0.030 | -0.765 |
| F2r11         | 0.605  | 9.268  | 3.912  | 0.001 | 0.030 | -0.772 |
| Sfxn3         | -1.041 | 7.457  | -3.912 | 0.001 | 0.030 | -0.773 |
| Dtnbp1        | -1.043 | 7.403  | -3.911 | 0.001 | 0.030 | -0.775 |
| Arhgap22      | -0.912 | 6.107  | -3.910 | 0.001 | 0.030 | -0.776 |
| Prnp          | -1.532 | 7.459  | -3.910 | 0.001 | 0.030 | -0.778 |
| Zfp853        | -0.467 | 3.972  | -3.907 | 0.001 | 0.030 | -0.783 |

|               |        |        |        |       |       |        |
|---------------|--------|--------|--------|-------|-------|--------|
| 1810018F18Rik | -0.456 | 2.864  | -3.907 | 0.001 | 0.030 | -0.783 |
| Ikbkb         | 0.853  | 9.034  | 3.906  | 0.001 | 0.030 | -0.784 |
| Rtbdn         | -0.486 | 6.064  | -3.904 | 0.001 | 0.030 | -0.789 |
| Srsf11        | 0.833  | 7.353  | 3.903  | 0.001 | 0.030 | -0.792 |
| 6720418B01Rik | -0.439 | 3.101  | -3.902 | 0.001 | 0.030 | -0.794 |
| Psmb4         | 0.586  | 10.801 | 3.901  | 0.001 | 0.030 | -0.794 |
| Cbln4         | -0.571 | 2.900  | -3.901 | 0.001 | 0.030 | -0.794 |
| Slc25a23      | -1.200 | 6.128  | -3.900 | 0.001 | 0.030 | -0.797 |
| Dpy1911       | 0.988  | 5.151  | 3.900  | 0.001 | 0.030 | -0.798 |
| Prom2         | -1.983 | 5.611  | -3.897 | 0.001 | 0.030 | -0.803 |
| Spats2        | 0.492  | 6.938  | 3.896  | 0.001 | 0.030 | -0.806 |
| Zmat4         | -0.529 | 3.381  | -3.896 | 0.001 | 0.030 | -0.806 |
| Bmp1          | -0.407 | 6.171  | -3.895 | 0.001 | 0.030 | -0.808 |
| Heatr1        | 0.775  | 8.004  | 3.895  | 0.001 | 0.030 | -0.809 |
| 1700060J05Rik | -0.451 | 2.556  | -3.893 | 0.001 | 0.031 | -0.812 |
| Trappc3       | 0.671  | 8.789  | 3.891  | 0.001 | 0.031 | -0.816 |
| Cox8c         | -0.702 | 5.438  | -3.890 | 0.001 | 0.031 | -0.818 |
| Pfkp          | 0.788  | 9.378  | 3.890  | 0.001 | 0.031 | -0.819 |
| Scamp2        | 0.501  | 9.685  | 3.888  | 0.001 | 0.031 | -0.822 |
| Ndor1         | 0.547  | 4.805  | 3.886  | 0.001 | 0.031 | -0.826 |
| Nr4a3         | -0.578 | 4.055  | -3.885 | 0.001 | 0.031 | -0.829 |
| Marveld3      | -0.645 | 3.521  | -3.884 | 0.001 | 0.031 | -0.830 |
| Art1          | -0.483 | 5.352  | -3.883 | 0.001 | 0.031 | -0.832 |
| Sdr9c7        | -1.681 | 5.320  | -3.883 | 0.001 | 0.031 | -0.833 |
| Sf3b1         | 0.635  | 5.920  | 3.881  | 0.001 | 0.031 | -0.836 |
| Mitf          | -1.215 | 3.834  | -3.881 | 0.001 | 0.031 | -0.837 |
| 2210011C24Rik | -0.736 | 5.639  | -3.881 | 0.001 | 0.031 | -0.837 |
| E230008N13Rik | -0.860 | 4.993  | -3.880 | 0.001 | 0.031 | -0.838 |
| Nron          | -0.639 | 3.840  | -3.878 | 0.001 | 0.031 | -0.842 |
| Slc12a5       | -0.462 | 3.905  | -3.878 | 0.001 | 0.031 | -0.844 |
| Jmy           | -0.823 | 4.735  | -3.877 | 0.001 | 0.031 | -0.844 |
| Birc2         | 0.692  | 7.439  | 3.877  | 0.001 | 0.031 | -0.845 |
| Ppip5k1       | 1.034  | 5.897  | 3.875  | 0.001 | 0.031 | -0.848 |
| 1810034E14Rik | -0.478 | 4.274  | -3.875 | 0.001 | 0.031 | -0.848 |
| 6030419C18Rik | -0.410 | 4.252  | -3.875 | 0.001 | 0.031 | -0.848 |
| AW549877      | -0.735 | 7.979  | -3.875 | 0.001 | 0.031 | -0.850 |
| Gm19924       | -0.502 | 3.689  | -3.874 | 0.001 | 0.031 | -0.850 |
| Etfdh         | -0.803 | 8.686  | -3.874 | 0.001 | 0.031 | -0.852 |
| Cftr          | 3.801  | 7.052  | 3.873  | 0.001 | 0.031 | -0.853 |
| 1700084J12Rik | -0.479 | 2.884  | -3.873 | 0.001 | 0.031 | -0.853 |
| Axdnd1        | -0.410 | 2.241  | -3.873 | 0.001 | 0.031 | -0.854 |
| Pde8a         | -0.480 | 8.567  | -3.872 | 0.001 | 0.031 | -0.856 |
| Emilin2       | -1.009 | 5.333  | -3.871 | 0.001 | 0.031 | -0.856 |
| Gm8430        | 0.439  | 12.650 | 3.870  | 0.001 | 0.031 | -0.859 |
| Lrmp          | 1.352  | 7.100  | 3.869  | 0.001 | 0.031 | -0.861 |
| 4933403L11Rik | -0.569 | 2.861  | -3.869 | 0.001 | 0.031 | -0.861 |
| Prcl          | 0.869  | 6.941  | 3.868  | 0.001 | 0.031 | -0.863 |
| Sod2          | -0.885 | 10.192 | -3.867 | 0.001 | 0.031 | -0.865 |
| D730001G18Rik | -0.729 | 3.767  | -3.867 | 0.001 | 0.031 | -0.866 |
| Sgsh          | -0.498 | 4.855  | -3.866 | 0.001 | 0.031 | -0.867 |

|               |        |        |        |       |       |        |
|---------------|--------|--------|--------|-------|-------|--------|
| Cs1           | -0.491 | 2.791  | -3.862 | 0.001 | 0.031 | -0.876 |
| Mgst1         | 1.631  | 10.887 | 3.859  | 0.001 | 0.031 | -0.881 |
| Atp6v0a2      | 0.503  | 5.571  | 3.859  | 0.001 | 0.031 | -0.881 |
| Tmed5         | 0.981  | 8.309  | 3.858  | 0.001 | 0.031 | -0.883 |
| Gm26831       | -0.573 | 3.030  | -3.857 | 0.001 | 0.031 | -0.886 |
| Wscd2         | -0.731 | 3.601  | -3.857 | 0.001 | 0.031 | -0.886 |
| Echs1         | -0.682 | 9.544  | -3.857 | 0.001 | 0.031 | -0.886 |
| Bpifa5        | -0.521 | 5.375  | -3.855 | 0.001 | 0.031 | -0.889 |
| 5730455P16Rik | -0.596 | 5.136  | -3.854 | 0.001 | 0.032 | -0.892 |
| Gm1965        | -0.481 | 3.612  | -3.853 | 0.001 | 0.032 | -0.894 |
| Gm20556       | -0.398 | 2.454  | -3.852 | 0.001 | 0.032 | -0.896 |
| Cnn3          | -1.377 | 9.399  | -3.851 | 0.001 | 0.032 | -0.899 |
| Efr3a         | 0.774  | 8.519  | 3.851  | 0.001 | 0.032 | -0.899 |
| Noxol         | 2.662  | 7.799  | 3.845  | 0.001 | 0.032 | -0.911 |
| Gpa33         | 2.314  | 7.477  | 3.845  | 0.001 | 0.032 | -0.911 |
| Ccdc57        | -0.656 | 4.310  | -3.844 | 0.001 | 0.032 | -0.912 |
| BC005764      | -0.541 | 5.743  | -3.844 | 0.001 | 0.032 | -0.913 |
| Mterfd3       | -0.943 | 5.259  | -3.844 | 0.001 | 0.032 | -0.913 |
| AW011738      | -0.532 | 4.335  | -3.844 | 0.001 | 0.032 | -0.914 |
| Hrnnpm        | 0.527  | 8.695  | 3.842  | 0.001 | 0.032 | -0.918 |
| Ghitm         | -0.643 | 9.707  | -3.840 | 0.001 | 0.032 | -0.921 |
| 1500002F19Rik | -0.633 | 3.821  | -3.838 | 0.001 | 0.032 | -0.926 |
| 9230104L09Rik | -0.482 | 4.671  | -3.838 | 0.001 | 0.032 | -0.926 |
| Escol         | 0.405  | 8.886  | 3.837  | 0.001 | 0.032 | -0.926 |
| Dpysl2        | 0.701  | 8.541  | 3.837  | 0.001 | 0.032 | -0.927 |
| Eif4enif1     | 0.335  | 7.775  | 3.837  | 0.001 | 0.032 | -0.927 |
| Mob3a         | 0.649  | 6.570  | 3.837  | 0.001 | 0.032 | -0.927 |
| Serpina3g     | 3.159  | 7.036  | 3.836  | 0.001 | 0.032 | -0.930 |
| Sord          | 1.490  | 8.378  | 3.835  | 0.001 | 0.032 | -0.931 |
| BC051212      | -0.571 | 3.523  | -3.835 | 0.001 | 0.032 | -0.932 |
| Cbl           | 0.526  | 7.894  | 3.835  | 0.001 | 0.032 | -0.932 |
| Tmem176b      | 1.049  | 10.164 | 3.834  | 0.001 | 0.032 | -0.934 |
| 3110037L02Rik | -0.494 | 3.141  | -3.833 | 0.001 | 0.032 | -0.935 |
| Tarsl2        | -0.924 | 5.609  | -3.833 | 0.001 | 0.032 | -0.936 |
| Clec16a       | -0.502 | 5.056  | -3.833 | 0.001 | 0.032 | -0.936 |
| 2610005L07Rik | 1.252  | 5.834  | 3.832  | 0.001 | 0.032 | -0.938 |
| Slfn9         | 1.210  | 6.823  | 3.831  | 0.001 | 0.032 | -0.939 |
| Immt          | -0.991 | 7.311  | -3.830 | 0.001 | 0.032 | -0.941 |
| Dnajb12       | -0.585 | 5.168  | -3.830 | 0.001 | 0.032 | -0.942 |
| 2310040G24Rik | -0.467 | 3.518  | -3.829 | 0.001 | 0.032 | -0.943 |
| Stil          | 0.905  | 5.068  | 3.829  | 0.001 | 0.032 | -0.944 |
| Olf976        | -0.476 | 3.634  | -3.828 | 0.001 | 0.032 | -0.946 |
| Fezf1         | -0.615 | 3.265  | -3.826 | 0.001 | 0.032 | -0.951 |
| Prrt3         | -0.410 | 3.057  | -3.825 | 0.001 | 0.032 | -0.952 |
| 1810028F09Rik | -0.776 | 3.209  | -3.822 | 0.001 | 0.032 | -0.957 |
| Rhcg          | -0.562 | 4.282  | -3.822 | 0.001 | 0.032 | -0.959 |
| Fbxo25        | -0.890 | 7.415  | -3.821 | 0.001 | 0.032 | -0.960 |
| Mespl         | -0.541 | 5.405  | -3.821 | 0.001 | 0.032 | -0.961 |
| Drp2          | -0.822 | 5.209  | -3.820 | 0.001 | 0.032 | -0.963 |
| Amy2a1        | -3.929 | 5.576  | -3.819 | 0.001 | 0.032 | -0.964 |

|               |        |        |        |       |       |        |
|---------------|--------|--------|--------|-------|-------|--------|
| Slc16a6       | 1.007  | 5.822  | 3.818  | 0.001 | 0.033 | -0.967 |
| Placl         | -0.474 | 3.941  | -3.818 | 0.001 | 0.033 | -0.968 |
| Pcdh19        | -0.885 | 4.036  | -3.817 | 0.001 | 0.033 | -0.969 |
| Sirt3         | -0.538 | 6.545  | -3.814 | 0.001 | 0.033 | -0.974 |
| 4930550L24Rik | -0.442 | 3.751  | -3.814 | 0.001 | 0.033 | -0.974 |
| Mroh1         | -0.537 | 7.847  | -3.814 | 0.001 | 0.033 | -0.975 |
| Spal7         | -0.899 | 4.265  | -3.814 | 0.001 | 0.033 | -0.976 |
| Tnfaip8       | 1.017  | 7.279  | 3.813  | 0.001 | 0.033 | -0.976 |
| Cd247         | -0.457 | 3.360  | -3.812 | 0.001 | 0.033 | -0.979 |
| 2510046G10Rik | -0.528 | 4.193  | -3.811 | 0.001 | 0.033 | -0.981 |
| Ift88         | -0.549 | 6.191  | -3.810 | 0.001 | 0.033 | -0.984 |
| E130006N16Rik | -0.576 | 4.558  | -3.809 | 0.001 | 0.033 | -0.985 |
| Zfp85os       | -0.500 | 3.042  | -3.809 | 0.001 | 0.033 | -0.986 |
| Kcnj13        | -1.255 | 6.113  | -3.808 | 0.001 | 0.033 | -0.987 |
| Smg1          | 0.775  | 7.774  | 3.808  | 0.001 | 0.033 | -0.988 |
| Slc5a6        | -0.603 | 4.541  | -3.807 | 0.001 | 0.033 | -0.990 |
| S100a6        | 0.527  | 12.835 | 3.806  | 0.001 | 0.033 | -0.991 |
| Sfn           | 1.183  | 8.530  | 3.806  | 0.001 | 0.033 | -0.992 |
| Pepd          | -0.376 | 8.100  | -3.805 | 0.001 | 0.033 | -0.993 |
| Cst13         | -0.425 | 3.304  | -3.805 | 0.001 | 0.033 | -0.993 |
| Lancl3        | -0.903 | 2.942  | -3.805 | 0.001 | 0.033 | -0.994 |
| Map6          | -0.476 | 4.473  | -3.804 | 0.001 | 0.033 | -0.995 |
| Ptpre         | 1.353  | 6.204  | 3.803  | 0.001 | 0.033 | -0.999 |
| Stamos        | -0.839 | 4.823  | -3.801 | 0.001 | 0.033 | -1.001 |
| Afap111       | -0.568 | 5.067  | -3.800 | 0.001 | 0.033 | -1.004 |
| Gml2191       | 0.482  | 12.111 | 3.800  | 0.001 | 0.033 | -1.004 |
| Zfp712        | -0.552 | 3.400  | -3.799 | 0.001 | 0.033 | -1.005 |
| Ina           | -0.461 | 4.952  | -3.797 | 0.001 | 0.033 | -1.009 |
| Gzmd          | -0.374 | 2.207  | -3.797 | 0.001 | 0.033 | -1.011 |
| Cdk11         | -1.031 | 3.976  | -3.796 | 0.001 | 0.033 | -1.011 |
| Speer3        | -0.629 | 4.639  | -3.796 | 0.001 | 0.033 | -1.012 |
| Tmed4         | -0.437 | 10.723 | -3.795 | 0.001 | 0.033 | -1.014 |
| Ccar1         | 0.583  | 8.201  | 3.795  | 0.001 | 0.033 | -1.014 |
| Bdkrb2        | -0.493 | 3.545  | -3.794 | 0.001 | 0.033 | -1.016 |
| Rab19         | 0.890  | 6.880  | 3.794  | 0.001 | 0.033 | -1.016 |
| Csnk1a1       | 0.391  | 10.840 | 3.793  | 0.001 | 0.033 | -1.018 |
| 5830485P09Rik | -0.532 | 4.097  | -3.790 | 0.001 | 0.033 | -1.024 |
| Tmem139       | -0.834 | 8.126  | -3.790 | 0.001 | 0.033 | -1.025 |
| Serpina1a     | 0.883  | 10.401 | 3.789  | 0.001 | 0.033 | -1.026 |
| Oog3          | -0.402 | 2.296  | -3.789 | 0.001 | 0.033 | -1.026 |
| Fbxo17        | -0.632 | 4.914  | -3.788 | 0.001 | 0.033 | -1.028 |
| Car14         | -0.453 | 4.612  | -3.786 | 0.001 | 0.033 | -1.032 |
| Ttll6         | -0.611 | 4.515  | -3.786 | 0.001 | 0.033 | -1.033 |
| Tacr1         | -0.478 | 4.087  | -3.786 | 0.001 | 0.033 | -1.034 |
| Slc7a8        | -1.553 | 6.835  | -3.785 | 0.001 | 0.033 | -1.035 |
| Trpt1         | -0.605 | 5.436  | -3.785 | 0.001 | 0.033 | -1.035 |
| Cxxc5         | -0.991 | 6.762  | -3.784 | 0.001 | 0.033 | -1.038 |
| Jag2          | -0.642 | 6.854  | -3.783 | 0.001 | 0.033 | -1.040 |
| Copz2         | -1.506 | 6.435  | -3.782 | 0.001 | 0.033 | -1.042 |
| Stk19         | 0.720  | 7.014  | 3.782  | 0.001 | 0.033 | -1.042 |

|               |        |        |        |       |       |        |
|---------------|--------|--------|--------|-------|-------|--------|
| Urah          | 1.837  | 7.917  | 3.779  | 0.001 | 0.034 | -1.048 |
| Ndufs1        | -0.513 | 9.791  | -3.779 | 0.001 | 0.034 | -1.048 |
| Gm4876        | -0.536 | 3.468  | -3.779 | 0.001 | 0.034 | -1.048 |
| Dazl          | -0.437 | 2.666  | -3.778 | 0.001 | 0.034 | -1.050 |
| Slc25a37      | 0.942  | 7.173  | 3.777  | 0.001 | 0.034 | -1.051 |
| Chrna7        | -0.467 | 2.614  | -3.776 | 0.001 | 0.034 | -1.053 |
| Kctd12b       | 1.081  | 6.027  | 3.776  | 0.001 | 0.034 | -1.053 |
| Tcn2          | -0.614 | 7.741  | -3.776 | 0.001 | 0.034 | -1.054 |
| Slc5a7        | -0.517 | 3.371  | -3.776 | 0.001 | 0.034 | -1.054 |
| Mpdul         | 0.662  | 8.511  | 3.775  | 0.001 | 0.034 | -1.055 |
| Lingo3        | -0.504 | 4.551  | -3.774 | 0.001 | 0.034 | -1.058 |
| Inhbc         | -0.581 | 4.078  | -3.774 | 0.001 | 0.034 | -1.058 |
| Art4          | -0.522 | 3.250  | -3.774 | 0.001 | 0.034 | -1.058 |
| Bub3          | 0.400  | 9.710  | 3.773  | 0.001 | 0.034 | -1.059 |
| Mrpl45        | 0.629  | 8.534  | 3.773  | 0.001 | 0.034 | -1.060 |
| Fign          | -0.569 | 2.842  | -3.772 | 0.001 | 0.034 | -1.062 |
| Elane         | -0.572 | 4.580  | -3.767 | 0.001 | 0.034 | -1.072 |
| H60a          | -0.384 | 2.140  | -3.766 | 0.002 | 0.034 | -1.074 |
| B230208B08Rik | -0.499 | 3.216  | -3.766 | 0.002 | 0.034 | -1.074 |
| Gp6           | -0.389 | 3.678  | -3.766 | 0.002 | 0.034 | -1.074 |
| Gm2115        | -0.773 | 3.706  | -3.766 | 0.002 | 0.034 | -1.075 |
| Max           | 0.780  | 6.573  | 3.764  | 0.002 | 0.034 | -1.079 |
| Fhad1         | -0.546 | 4.120  | -3.763 | 0.002 | 0.034 | -1.079 |
| Rab31         | -1.496 | 6.671  | -3.763 | 0.002 | 0.034 | -1.081 |
| Fam20c        | -0.486 | 5.624  | -3.762 | 0.002 | 0.034 | -1.082 |
| Psm13         | 0.817  | 8.509  | 3.760  | 0.002 | 0.034 | -1.085 |
| Furin         | -1.396 | 9.257  | -3.760 | 0.002 | 0.034 | -1.086 |
| Nme1          | 0.807  | 10.005 | 3.760  | 0.002 | 0.034 | -1.087 |
| AF529169      | -0.563 | 3.302  | -3.759 | 0.002 | 0.034 | -1.089 |
| Gsdmcl-ps     | -0.414 | 3.777  | -3.757 | 0.002 | 0.034 | -1.094 |
| Mettl4-ps1    | -0.399 | 2.203  | -3.756 | 0.002 | 0.034 | -1.094 |
| Hsd17b2       | -0.975 | 8.066  | -3.756 | 0.002 | 0.034 | -1.095 |
| Voppl         | 0.455  | 8.039  | 3.756  | 0.002 | 0.034 | -1.095 |
| Bbs4          | -0.856 | 3.720  | -3.755 | 0.002 | 0.034 | -1.096 |
| Ccb11         | -0.531 | 6.238  | -3.755 | 0.002 | 0.034 | -1.097 |
| 9630028H03Rik | -0.453 | 3.889  | -3.754 | 0.002 | 0.034 | -1.098 |
| Gnpdal        | -0.617 | 7.058  | -3.754 | 0.002 | 0.034 | -1.098 |
| Asic5         | -1.094 | 4.117  | -3.753 | 0.002 | 0.034 | -1.100 |
| Iscu          | -0.666 | 9.099  | -3.753 | 0.002 | 0.034 | -1.101 |
| D13Ertd205e   | -0.727 | 2.731  | -3.753 | 0.002 | 0.034 | -1.101 |
| Krt82         | -0.537 | 3.078  | -3.752 | 0.002 | 0.034 | -1.102 |
| Gnas          | -0.578 | 3.232  | -3.752 | 0.002 | 0.034 | -1.104 |
| 4933431E20Rik | -0.608 | 4.563  | -3.748 | 0.002 | 0.034 | -1.110 |
| Celf3         | -0.644 | 5.997  | -3.748 | 0.002 | 0.034 | -1.111 |
| Hck           | 1.345  | 7.732  | 3.747  | 0.002 | 0.034 | -1.113 |
| Ss18          | 0.389  | 9.410  | 3.747  | 0.002 | 0.034 | -1.114 |
| Sema4g        | 0.944  | 6.942  | 3.745  | 0.002 | 0.034 | -1.117 |
| Adss11        | -1.693 | 5.482  | -3.744 | 0.002 | 0.035 | -1.119 |
| Uba2          | 0.505  | 9.773  | 3.742  | 0.002 | 0.035 | -1.124 |
| 9130024F11Rik | -0.467 | 2.287  | -3.742 | 0.002 | 0.035 | -1.124 |

|               |        |        |        |       |       |        |
|---------------|--------|--------|--------|-------|-------|--------|
| Arhgef28      | -0.738 | 8.161  | -3.741 | 0.002 | 0.035 | -1.126 |
| Fam57b        | -0.542 | 3.480  | -3.740 | 0.002 | 0.035 | -1.129 |
| Irx6          | -0.496 | 4.460  | -3.739 | 0.002 | 0.035 | -1.129 |
| Rab39b        | -0.549 | 2.683  | -3.739 | 0.002 | 0.035 | -1.129 |
| 4930417022Rik | -0.552 | 3.038  | -3.739 | 0.002 | 0.035 | -1.130 |
| Os9           | -0.482 | 9.562  | -3.739 | 0.002 | 0.035 | -1.130 |
| Ctsb          | -0.347 | 12.241 | -3.738 | 0.002 | 0.035 | -1.131 |
| Gm13102       | -0.370 | 2.524  | -3.738 | 0.002 | 0.035 | -1.131 |
| Irs3          | -0.521 | 2.780  | -3.738 | 0.002 | 0.035 | -1.132 |
| Gpr75         | -0.541 | 3.333  | -3.738 | 0.002 | 0.035 | -1.132 |
| Ube2s         | 0.812  | 10.004 | 3.737  | 0.002 | 0.035 | -1.133 |
| Hexb          | 1.411  | 7.305  | 3.737  | 0.002 | 0.035 | -1.133 |
| 5830458C19Rik | -0.504 | 2.973  | -3.736 | 0.002 | 0.035 | -1.135 |
| Fn3k          | -0.809 | 3.618  | -3.736 | 0.002 | 0.035 | -1.136 |
| Defa-rs2      | -0.551 | 7.324  | -3.733 | 0.002 | 0.035 | -1.143 |
| Csmd2         | -0.636 | 4.012  | -3.733 | 0.002 | 0.035 | -1.143 |
| Hmgcr         | 0.643  | 7.679  | 3.732  | 0.002 | 0.035 | -1.144 |
| Dbf4          | 0.820  | 7.592  | 3.731  | 0.002 | 0.035 | -1.146 |
| Mak           | -0.562 | 3.166  | -3.730 | 0.002 | 0.035 | -1.148 |
| Cbs           | -1.192 | 4.931  | -3.730 | 0.002 | 0.035 | -1.149 |
| AK160502      | -0.479 | 2.621  | -3.730 | 0.002 | 0.035 | -1.149 |
| Cd3001g       | -0.565 | 3.784  | -3.728 | 0.002 | 0.035 | -1.153 |
| Trim2         | -0.719 | 8.537  | -3.727 | 0.002 | 0.035 | -1.154 |
| 1700084K02Rik | -0.485 | 4.231  | -3.727 | 0.002 | 0.035 | -1.154 |
| Umps          | -0.430 | 2.352  | -3.727 | 0.002 | 0.035 | -1.155 |
| Agtr1a        | -0.612 | 4.548  | -3.722 | 0.002 | 0.035 | -1.164 |
| 4931406H21Rik | -0.562 | 3.511  | -3.722 | 0.002 | 0.035 | -1.165 |
| 1700063K16Rik | -0.582 | 4.362  | -3.719 | 0.002 | 0.035 | -1.172 |
| Rps15a        | 0.432  | 12.297 | 3.714  | 0.002 | 0.036 | -1.181 |
| Pitx1         | 1.238  | 7.197  | 3.713  | 0.002 | 0.036 | -1.183 |
| Prph          | -0.630 | 4.156  | -3.713 | 0.002 | 0.036 | -1.184 |
| Ndst1         | -0.698 | 4.033  | -3.712 | 0.002 | 0.036 | -1.186 |
| Gm11508       | -0.441 | 4.031  | -3.711 | 0.002 | 0.036 | -1.187 |
| Mthfd21       | 0.841  | 6.270  | 3.711  | 0.002 | 0.036 | -1.188 |
| Ralgapa2      | -0.702 | 8.113  | -3.711 | 0.002 | 0.036 | -1.189 |
| Dok7          | -0.554 | 6.021  | -3.708 | 0.002 | 0.036 | -1.193 |
| Steap2        | 0.617  | 7.742  | 3.708  | 0.002 | 0.036 | -1.194 |
| Ube3a         | 0.670  | 9.527  | 3.707  | 0.002 | 0.036 | -1.195 |
| Gm10029       | 0.359  | 12.427 | 3.707  | 0.002 | 0.036 | -1.197 |
| Park2         | -0.732 | 4.170  | -3.706 | 0.002 | 0.036 | -1.197 |
| K1            | -0.510 | 3.357  | -3.706 | 0.002 | 0.036 | -1.198 |
| AK052226      | -0.626 | 4.997  | -3.702 | 0.002 | 0.036 | -1.205 |
| Smim19        | -0.586 | 7.174  | -3.701 | 0.002 | 0.036 | -1.208 |
| Tmsb15a       | -0.575 | 3.104  | -3.701 | 0.002 | 0.036 | -1.208 |
| Asphd2        | -0.548 | 4.347  | -3.700 | 0.002 | 0.036 | -1.210 |
| Rbmx12        | -0.405 | 3.302  | -3.699 | 0.002 | 0.036 | -1.212 |
| St18          | -0.624 | 3.760  | -3.699 | 0.002 | 0.036 | -1.213 |
| Mapk8ip2      | -0.404 | 5.674  | -3.697 | 0.002 | 0.036 | -1.216 |
| Zfp708        | -0.472 | 2.859  | -3.697 | 0.002 | 0.036 | -1.217 |
| Cby3          | -0.519 | 3.187  | -3.697 | 0.002 | 0.036 | -1.217 |

|               |        |        |        |       |       |        |
|---------------|--------|--------|--------|-------|-------|--------|
| Snhg8         | 0.814  | 10.993 | 3.696  | 0.002 | 0.036 | -1.218 |
| Nab1          | 0.707  | 9.859  | 3.695  | 0.002 | 0.036 | -1.221 |
| Gm11744       | -0.552 | 4.988  | -3.694 | 0.002 | 0.037 | -1.224 |
| E130112B07Rik | -0.577 | 3.753  | -3.693 | 0.002 | 0.037 | -1.224 |
| R1f           | 0.720  | 6.340  | 3.692  | 0.002 | 0.037 | -1.226 |
| Arl4d         | -0.651 | 5.459  | -3.692 | 0.002 | 0.037 | -1.227 |
| Pdzrn3        | 1.928  | 6.545  | 3.691  | 0.002 | 0.037 | -1.230 |
| Plekha7       | 0.641  | 8.424  | 3.690  | 0.002 | 0.037 | -1.231 |
| Slco5a1       | -0.549 | 4.552  | -3.688 | 0.002 | 0.037 | -1.234 |
| Nkx2-2        | -0.678 | 3.416  | -3.686 | 0.002 | 0.037 | -1.239 |
| Lrrc40        | 0.633  | 6.983  | 3.686  | 0.002 | 0.037 | -1.239 |
| Sox14         | -0.516 | 5.855  | -3.686 | 0.002 | 0.037 | -1.239 |
| Hs3st4        | -0.424 | 3.718  | -3.686 | 0.002 | 0.037 | -1.240 |
| BC023202      | -0.650 | 5.048  | -3.685 | 0.002 | 0.037 | -1.240 |
| Ssu2          | -0.507 | 4.527  | -3.685 | 0.002 | 0.037 | -1.241 |
| 1700007K13Rik | -0.681 | 3.441  | -3.685 | 0.002 | 0.037 | -1.242 |
| Gdf15         | -0.468 | 5.845  | -3.685 | 0.002 | 0.037 | -1.242 |
| Tbc1d16       | -0.974 | 6.004  | -3.684 | 0.002 | 0.037 | -1.244 |
| Fbxo7         | -0.373 | 7.734  | -3.683 | 0.002 | 0.037 | -1.245 |
| Tial          | 1.385  | 7.212  | 3.683  | 0.002 | 0.037 | -1.246 |
| Trip12        | 0.445  | 10.419 | 3.682  | 0.002 | 0.037 | -1.248 |
| Dzip3         | -0.457 | 5.923  | -3.681 | 0.002 | 0.037 | -1.250 |
| Mcg1038069    | 0.503  | 9.616  | 3.680  | 0.002 | 0.037 | -1.252 |
| Itfgl         | -0.451 | 9.085  | -3.680 | 0.002 | 0.037 | -1.252 |
| 2900052L18Rik | -0.718 | 4.870  | -3.679 | 0.002 | 0.037 | -1.254 |
| Gapvdl        | 0.447  | 9.868  | 3.679  | 0.002 | 0.037 | -1.254 |
| Flcn          | -0.566 | 6.875  | -3.679 | 0.002 | 0.037 | -1.255 |
| Ecell         | -0.741 | 3.844  | -3.677 | 0.002 | 0.037 | -1.257 |
| Nefm          | -0.659 | 3.118  | -3.675 | 0.002 | 0.037 | -1.261 |
| 4930449E01Rik | -0.520 | 5.007  | -3.675 | 0.002 | 0.037 | -1.263 |
| Tnfrsf25      | -0.483 | 4.532  | -3.674 | 0.002 | 0.037 | -1.263 |
| Dnaja4        | -0.932 | 5.885  | -3.670 | 0.002 | 0.037 | -1.271 |
| AU020206      | 1.607  | 7.419  | 3.670  | 0.002 | 0.037 | -1.273 |
| Gpr123        | -0.496 | 3.702  | -3.669 | 0.002 | 0.037 | -1.275 |
| Elov15        | 1.795  | 8.096  | 3.668  | 0.002 | 0.037 | -1.275 |
| Emc3          | 0.377  | 9.811  | 3.668  | 0.002 | 0.037 | -1.277 |
| Ccl9          | 1.409  | 5.728  | 3.667  | 0.002 | 0.037 | -1.277 |
| Nup98         | 0.485  | 8.597  | 3.666  | 0.002 | 0.038 | -1.281 |
| Zfp804a       | -0.380 | 2.485  | -3.665 | 0.002 | 0.038 | -1.283 |
| Opalin        | -0.541 | 4.267  | -3.665 | 0.002 | 0.038 | -1.283 |
| Golga7b       | -0.606 | 6.203  | -3.664 | 0.002 | 0.038 | -1.284 |
| Atp10b        | -0.469 | 3.690  | -3.663 | 0.002 | 0.038 | -1.286 |
| Gramd1c       | -0.665 | 6.295  | -3.663 | 0.002 | 0.038 | -1.286 |
| Csnk2a2       | 0.811  | 5.355  | 3.663  | 0.002 | 0.038 | -1.286 |
| 1700001G17Rik | -0.544 | 4.795  | -3.663 | 0.002 | 0.038 | -1.287 |
| Cyp2j6        | -0.783 | 8.512  | -3.661 | 0.002 | 0.038 | -1.291 |
| 2500004C02Rik | -0.531 | 2.678  | -3.659 | 0.002 | 0.038 | -1.295 |
| Rabac1        | -0.671 | 10.021 | -3.658 | 0.002 | 0.038 | -1.296 |
| Fam19a2       | -0.421 | 3.277  | -3.657 | 0.002 | 0.038 | -1.298 |
| A830005F24Rik | -0.556 | 5.129  | -3.657 | 0.002 | 0.038 | -1.299 |

|               |        |        |        |       |       |        |
|---------------|--------|--------|--------|-------|-------|--------|
| Got111        | -0.501 | 3.620  | -3.656 | 0.002 | 0.038 | -1.301 |
| Dpagt1        | 0.445  | 8.498  | 3.655  | 0.002 | 0.038 | -1.302 |
| 4930473022Rik | -0.600 | 3.765  | -3.655 | 0.002 | 0.038 | -1.303 |
| Clic3         | -1.041 | 5.965  | -3.654 | 0.002 | 0.038 | -1.304 |
| Alox12        | -0.543 | 4.256  | -3.654 | 0.002 | 0.038 | -1.304 |
| P11p          | -0.439 | 10.842 | -3.654 | 0.002 | 0.038 | -1.305 |
| 2810433D01Rik | -0.500 | 2.492  | -3.654 | 0.002 | 0.038 | -1.306 |
| Slc39a11      | -0.783 | 10.229 | -3.654 | 0.002 | 0.038 | -1.306 |
| Vegfb         | -1.403 | 7.696  | -3.652 | 0.002 | 0.038 | -1.310 |
| Sdad1         | 0.544  | 6.994  | 3.651  | 0.002 | 0.038 | -1.311 |
| Tubb4a        | -0.509 | 5.903  | -3.650 | 0.002 | 0.038 | -1.313 |
| 2610507I01Rik | -0.712 | 5.219  | -3.649 | 0.002 | 0.038 | -1.315 |
| Ly75          | 1.665  | 5.007  | 3.648  | 0.002 | 0.038 | -1.317 |
| Lgi3          | -0.545 | 2.747  | -3.648 | 0.002 | 0.038 | -1.318 |
| Tmc8          | -0.514 | 7.243  | -3.647 | 0.002 | 0.038 | -1.320 |
| Olfr112       | -0.434 | 2.912  | -3.647 | 0.002 | 0.038 | -1.320 |
| Gm7056        | -0.443 | 2.563  | -3.647 | 0.002 | 0.038 | -1.320 |
| Chml          | -0.712 | 3.598  | -3.645 | 0.002 | 0.038 | -1.325 |
| LOC102637400  | -0.450 | 2.938  | -3.644 | 0.002 | 0.038 | -1.326 |
| Hcn2          | -0.497 | 4.564  | -3.644 | 0.002 | 0.038 | -1.326 |
| Arhgap17      | 0.628  | 7.287  | 3.641  | 0.002 | 0.039 | -1.333 |
| Traf6         | -0.568 | 4.953  | -3.638 | 0.002 | 0.039 | -1.337 |
| Sox15         | -0.560 | 3.856  | -3.638 | 0.002 | 0.039 | -1.338 |
| Alg9          | 0.439  | 8.394  | 3.638  | 0.002 | 0.039 | -1.339 |
| Cgrrf1        | -0.556 | 6.404  | -3.637 | 0.002 | 0.039 | -1.339 |
| Grik1         | -0.501 | 2.487  | -3.637 | 0.002 | 0.039 | -1.341 |
| App           | -0.853 | 10.744 | -3.637 | 0.002 | 0.039 | -1.341 |
| Gm17244       | -0.455 | 3.187  | -3.637 | 0.002 | 0.039 | -1.341 |
| Rnps1         | 0.586  | 9.601  | 3.636  | 0.002 | 0.039 | -1.341 |
| Srrt          | 0.644  | 8.127  | 3.636  | 0.002 | 0.039 | -1.342 |
| Mug1          | -3.304 | 5.082  | -3.635 | 0.002 | 0.039 | -1.344 |
| Ctss          | 2.448  | 9.230  | 3.635  | 0.002 | 0.039 | -1.344 |
| Otud7a        | -0.499 | 2.959  | -3.635 | 0.002 | 0.039 | -1.344 |
| Eif3e         | -0.504 | 3.644  | -3.635 | 0.002 | 0.039 | -1.344 |
| Dgat2         | 0.949  | 9.112  | 3.634  | 0.002 | 0.039 | -1.347 |
| Yod1          | 1.015  | 5.742  | 3.631  | 0.002 | 0.039 | -1.352 |
| Obox6         | -0.486 | 3.951  | -3.631 | 0.002 | 0.039 | -1.352 |
| C80889        | -0.550 | 3.201  | -3.631 | 0.002 | 0.039 | -1.353 |
| Cnn2          | 1.436  | 7.379  | 3.630  | 0.002 | 0.039 | -1.354 |
| Zscan20       | -0.480 | 4.455  | -3.630 | 0.002 | 0.039 | -1.355 |
| H2-Aa         | 3.326  | 11.260 | 3.629  | 0.002 | 0.039 | -1.356 |
| 4930402F06Rik | -0.514 | 3.171  | -3.629 | 0.002 | 0.039 | -1.357 |
| Taf9b         | -1.034 | 5.320  | -3.628 | 0.002 | 0.039 | -1.359 |
| 9330169B04Rik | -0.408 | 2.332  | -3.628 | 0.002 | 0.039 | -1.360 |
| Alkbh1        | 0.847  | 6.618  | 3.627  | 0.002 | 0.039 | -1.361 |
| Pvr13         | 0.934  | 5.227  | 3.625  | 0.002 | 0.039 | -1.365 |
| Cebpd         | 1.774  | 8.373  | 3.624  | 0.002 | 0.039 | -1.367 |
| Fam19a4       | -0.458 | 3.956  | -3.624 | 0.002 | 0.039 | -1.367 |
| Rel11         | 0.647  | 8.498  | 3.624  | 0.002 | 0.039 | -1.368 |
| Mylk          | -0.417 | 4.309  | -3.624 | 0.002 | 0.039 | -1.368 |



|               |        |        |        |       |       |        |
|---------------|--------|--------|--------|-------|-------|--------|
| Gm11651       | -0.586 | 3.233  | -3.624 | 0.002 | 0.039 | -1.368 |
| Klh110        | -0.622 | 3.315  | -3.624 | 0.002 | 0.039 | -1.368 |
| Strm          | -0.520 | 4.914  | -3.623 | 0.002 | 0.039 | -1.369 |
| Gpr3711       | -0.524 | 4.025  | -3.622 | 0.002 | 0.039 | -1.371 |
| Eda           | -0.475 | 5.131  | -3.621 | 0.002 | 0.039 | -1.372 |
| Ubqln1        | -0.550 | 4.281  | -3.621 | 0.002 | 0.039 | -1.373 |
| Gsdmc2        | 2.431  | 8.840  | 3.621  | 0.002 | 0.039 | -1.373 |
| Baz1a         | 1.049  | 8.002  | 3.621  | 0.002 | 0.039 | -1.374 |
| Trim25        | 0.485  | 10.677 | 3.620  | 0.002 | 0.039 | -1.375 |
| Wdsub1        | -1.222 | 7.334  | -3.620 | 0.002 | 0.039 | -1.375 |
| Zdhhc24       | -0.587 | 5.352  | -3.620 | 0.002 | 0.039 | -1.376 |
| Grhpr         | -1.007 | 8.336  | -3.619 | 0.002 | 0.039 | -1.377 |
| Stampb        | -0.502 | 6.418  | -3.619 | 0.002 | 0.039 | -1.378 |
| Naip2         | 0.719  | 7.383  | 3.618  | 0.002 | 0.039 | -1.379 |
| Icel          | 0.500  | 6.678  | 3.618  | 0.002 | 0.039 | -1.379 |
| Abhd16b       | -0.469 | 3.156  | -3.616 | 0.002 | 0.039 | -1.383 |
| Pnlip         | -0.483 | 3.554  | -3.616 | 0.002 | 0.039 | -1.383 |
| 2310001K24Rik | -0.583 | 5.434  | -3.616 | 0.002 | 0.039 | -1.383 |
| Zfp710        | 0.393  | 7.718  | 3.615  | 0.002 | 0.039 | -1.385 |
| Nxf2          | -0.467 | 3.231  | -3.615 | 0.002 | 0.039 | -1.385 |
| Plcg2         | 0.539  | 8.203  | 3.615  | 0.002 | 0.039 | -1.386 |
| Kcnmb2        | -0.794 | 4.943  | -3.614 | 0.002 | 0.039 | -1.387 |
| Tmem175       | -0.548 | 5.196  | -3.614 | 0.002 | 0.039 | -1.387 |
| Fam57a        | 0.488  | 8.363  | 3.614  | 0.002 | 0.039 | -1.387 |
| 5033430I15Rik | 0.711  | 3.929  | 3.614  | 0.002 | 0.039 | -1.388 |
| Syt1          | -0.405 | 3.181  | -3.613 | 0.002 | 0.039 | -1.390 |
| Zbed3         | -0.598 | 3.407  | -3.612 | 0.002 | 0.039 | -1.391 |
| Dazap1        | 0.488  | 8.667  | 3.612  | 0.002 | 0.039 | -1.392 |
| 9130410C08Rik | -0.488 | 3.233  | -3.610 | 0.002 | 0.039 | -1.395 |
| Fgf4          | -0.601 | 2.868  | -3.610 | 0.002 | 0.039 | -1.396 |
| Mc3r          | -0.359 | 4.274  | -3.609 | 0.002 | 0.039 | -1.397 |
| Dlk2          | -0.557 | 5.750  | -3.607 | 0.002 | 0.039 | -1.401 |
| Cript         | -0.543 | 9.027  | -3.607 | 0.002 | 0.039 | -1.402 |
| Pnliprpl      | -2.065 | 7.836  | -3.606 | 0.002 | 0.039 | -1.403 |
| 2900060N12Rik | -0.717 | 3.323  | -3.606 | 0.002 | 0.039 | -1.403 |
| Spaml         | -0.389 | 2.584  | -3.605 | 0.002 | 0.039 | -1.406 |
| Hira          | -0.785 | 6.579  | -3.605 | 0.002 | 0.039 | -1.406 |
| Cbx6          | 0.665  | 7.390  | 3.604  | 0.002 | 0.039 | -1.408 |
| 4930473H19Rik | -0.582 | 4.023  | -3.604 | 0.002 | 0.039 | -1.408 |
| C77905        | -0.569 | 4.332  | -3.603 | 0.002 | 0.039 | -1.410 |
| 4930592C13Rik | -0.587 | 3.852  | -3.602 | 0.002 | 0.039 | -1.412 |
| Isca1         | -0.610 | 9.714  | -3.602 | 0.002 | 0.039 | -1.412 |
| Ubox5         | -0.671 | 5.719  | -3.602 | 0.002 | 0.039 | -1.413 |
| Steap3        | -0.561 | 5.888  | -3.601 | 0.002 | 0.039 | -1.414 |
| Tstd1         | -0.962 | 7.899  | -3.601 | 0.002 | 0.039 | -1.414 |
| Gas213        | 0.975  | 6.395  | 3.600  | 0.002 | 0.039 | -1.416 |
| Lhfp15        | -0.575 | 4.928  | -3.600 | 0.002 | 0.039 | -1.416 |
| 4930488B22Rik | -0.552 | 4.102  | -3.600 | 0.002 | 0.039 | -1.417 |
| Set           | 0.630  | 10.149 | 3.599  | 0.002 | 0.039 | -1.418 |
| Rgs12         | -0.634 | 3.818  | -3.599 | 0.002 | 0.039 | -1.419 |

|               |        |        |        |       |       |        |
|---------------|--------|--------|--------|-------|-------|--------|
| H2afy         | 0.748  | 10.046 | 3.598  | 0.002 | 0.039 | -1.420 |
| Lkaaearl      | -0.460 | 2.631  | -3.598 | 0.002 | 0.039 | -1.421 |
| E2f2          | 0.692  | 6.642  | 3.597  | 0.002 | 0.040 | -1.423 |
| AI662270      | 1.997  | 4.490  | 3.596  | 0.002 | 0.040 | -1.425 |
| Gstt4         | -0.436 | 3.159  | -3.594 | 0.002 | 0.040 | -1.429 |
| Cntnap5a      | -0.550 | 2.425  | -3.593 | 0.002 | 0.040 | -1.431 |
| 2900022M07Rik | -0.490 | 2.625  | -3.593 | 0.002 | 0.040 | -1.432 |
| Itga3         | 0.574  | 8.412  | 3.592  | 0.002 | 0.040 | -1.433 |
| Gm9769        | 0.431  | 10.551 | 3.592  | 0.002 | 0.040 | -1.433 |
| BB557941      | -0.540 | 3.534  | -3.591 | 0.002 | 0.040 | -1.434 |
| Pspcl         | 0.604  | 6.698  | 3.590  | 0.002 | 0.040 | -1.436 |
| Gpr110        | -0.483 | 2.524  | -3.590 | 0.002 | 0.040 | -1.437 |
| Crat          | -0.984 | 6.983  | -3.589 | 0.002 | 0.040 | -1.438 |
| 4930524007Rik | -0.479 | 5.807  | -3.589 | 0.002 | 0.040 | -1.439 |
| Aplp1         | -1.007 | 6.721  | -3.589 | 0.002 | 0.040 | -1.439 |
| Pamr1         | -0.987 | 4.173  | -3.587 | 0.002 | 0.040 | -1.442 |
| Mta2          | 0.496  | 8.217  | 3.587  | 0.002 | 0.040 | -1.443 |
| Pcdhb19       | -0.524 | 3.432  | -3.587 | 0.002 | 0.040 | -1.443 |
| Bckdha        | -1.053 | 8.166  | -3.587 | 0.002 | 0.040 | -1.443 |
| Rpl18         | 0.540  | 11.774 | 3.587  | 0.002 | 0.040 | -1.443 |
| Pex5l         | -0.490 | 3.905  | -3.587 | 0.002 | 0.040 | -1.443 |
| Shb           | 0.496  | 8.622  | 3.587  | 0.002 | 0.040 | -1.444 |
| Fam120aos     | -0.639 | 7.383  | -3.586 | 0.002 | 0.040 | -1.445 |
| Pbld1         | -1.197 | 4.243  | -3.585 | 0.002 | 0.040 | -1.448 |
| Pgbd1         | -0.560 | 4.145  | -3.584 | 0.002 | 0.040 | -1.448 |
| A630039003Rik | -0.396 | 3.367  | -3.583 | 0.002 | 0.040 | -1.451 |
| Lmo4          | 1.019  | 9.685  | 3.583  | 0.002 | 0.040 | -1.451 |
| Tgfb3         | -0.768 | 4.047  | -3.582 | 0.002 | 0.040 | -1.453 |
| Emc9          | -0.547 | 6.209  | -3.582 | 0.002 | 0.040 | -1.453 |
| Cdan1         | -0.765 | 4.659  | -3.582 | 0.002 | 0.040 | -1.453 |
| Ccdc42os      | -0.627 | 4.938  | -3.581 | 0.002 | 0.040 | -1.455 |
| Acta1         | -0.515 | 4.968  | -3.581 | 0.002 | 0.040 | -1.455 |
| Cacng8        | -0.627 | 4.432  | -3.579 | 0.002 | 0.040 | -1.459 |
| Vmn2r103      | -0.683 | 2.847  | -3.579 | 0.002 | 0.040 | -1.460 |
| DQ699523      | -0.608 | 4.070  | -3.579 | 0.002 | 0.040 | -1.460 |
| Tmcc2         | -0.602 | 4.858  | -3.578 | 0.002 | 0.040 | -1.462 |
| Hrnnpu        | 0.373  | 10.131 | 3.577  | 0.002 | 0.040 | -1.463 |
| Lyrn9         | -0.712 | 5.232  | -3.577 | 0.002 | 0.040 | -1.464 |
| Lrrfip1       | 0.683  | 10.098 | 3.576  | 0.002 | 0.040 | -1.465 |
| Epor          | -0.521 | 5.865  | -3.576 | 0.002 | 0.040 | -1.465 |
| Rtn4          | 1.924  | 8.037  | 3.575  | 0.002 | 0.040 | -1.468 |
| Tle3          | 0.630  | 6.157  | 3.574  | 0.002 | 0.040 | -1.469 |
| Ran           | 0.621  | 11.485 | 3.574  | 0.002 | 0.040 | -1.469 |
| Sdha          | -0.388 | 10.726 | -3.574 | 0.002 | 0.040 | -1.469 |
| Hsd11         | -0.664 | 7.530  | -3.573 | 0.002 | 0.040 | -1.471 |
| Tbx15         | -0.409 | 2.815  | -3.573 | 0.002 | 0.040 | -1.472 |
| Fam73b        | -0.484 | 5.094  | -3.572 | 0.002 | 0.040 | -1.473 |
| Slc41a2       | -0.549 | 8.469  | -3.571 | 0.002 | 0.040 | -1.475 |
| Bex2          | -1.157 | 6.473  | -3.571 | 0.002 | 0.040 | -1.477 |
| Tgm2          | 2.981  | 8.689  | 3.570  | 0.002 | 0.040 | -1.477 |

|               |        |       |        |       |       |        |
|---------------|--------|-------|--------|-------|-------|--------|
| Gm10308       | -0.458 | 2.688 | -3.570 | 0.002 | 0.040 | -1.479 |
| Hist2h2aa2    | -1.381 | 6.911 | -3.569 | 0.002 | 0.040 | -1.481 |
| Tmem151a      | -1.458 | 8.447 | -3.569 | 0.002 | 0.040 | -1.481 |
| Krt77         | -0.475 | 4.215 | -3.566 | 0.002 | 0.041 | -1.485 |
| Rorc          | -0.825 | 5.571 | -3.566 | 0.002 | 0.041 | -1.487 |
| Pmfbp1        | -0.514 | 5.378 | -3.565 | 0.002 | 0.041 | -1.489 |
| 2410131K14Rik | -0.666 | 4.231 | -3.564 | 0.002 | 0.041 | -1.490 |
| Wipf1         | 0.771  | 5.670 | 3.564  | 0.002 | 0.041 | -1.491 |
| Ncoa5         | 0.572  | 6.664 | 3.563  | 0.002 | 0.041 | -1.492 |
| Spns2         | 1.260  | 8.317 | 3.563  | 0.002 | 0.041 | -1.492 |
| Speer6-ps1    | -0.463 | 2.233 | -3.563 | 0.002 | 0.041 | -1.493 |
| Cacnale       | -0.607 | 4.271 | -3.562 | 0.002 | 0.041 | -1.494 |
| Dcbld2        | -0.834 | 5.864 | -3.562 | 0.002 | 0.041 | -1.494 |
| Prss23        | -2.003 | 7.708 | -3.562 | 0.002 | 0.041 | -1.495 |
| Mccc1         | -1.434 | 8.950 | -3.560 | 0.002 | 0.041 | -1.499 |
| Eps8          | 1.005  | 9.239 | 3.560  | 0.002 | 0.041 | -1.499 |
| Cobl          | -2.026 | 6.927 | -3.560 | 0.002 | 0.041 | -1.499 |
| Fam228a       | -0.504 | 4.126 | -3.559 | 0.002 | 0.041 | -1.500 |
| Coq9          | -0.785 | 9.150 | -3.558 | 0.002 | 0.041 | -1.502 |
| Fgf18         | -0.991 | 3.832 | -3.558 | 0.002 | 0.041 | -1.502 |
| Tex43         | -0.467 | 4.300 | -3.555 | 0.002 | 0.041 | -1.508 |
| I19           | -0.540 | 5.268 | -3.554 | 0.002 | 0.041 | -1.510 |
| Tshz1         | 0.486  | 7.733 | 3.554  | 0.002 | 0.041 | -1.511 |
| Mblac1        | -0.557 | 4.556 | -3.553 | 0.002 | 0.041 | -1.513 |
| Ephx2         | -1.157 | 8.710 | -3.553 | 0.002 | 0.041 | -1.514 |
| 5730415C11Rik | -0.489 | 3.368 | -3.552 | 0.002 | 0.041 | -1.514 |
| Ypel4         | -0.414 | 3.452 | -3.552 | 0.002 | 0.041 | -1.516 |
| Hdgf11        | -0.505 | 3.093 | -3.551 | 0.002 | 0.041 | -1.516 |
| Atp6v1c1      | -0.506 | 8.619 | -3.551 | 0.002 | 0.041 | -1.518 |
| Exoc312       | -0.593 | 3.569 | -3.551 | 0.002 | 0.041 | -1.518 |
| Rexo4         | 0.690  | 7.773 | 3.550  | 0.002 | 0.041 | -1.520 |
| Prr3          | 0.501  | 4.763 | 3.549  | 0.002 | 0.041 | -1.521 |
| Zfp454        | -0.479 | 3.765 | -3.549 | 0.002 | 0.041 | -1.522 |
| Nop56         | 0.644  | 7.536 | 3.549  | 0.002 | 0.041 | -1.522 |
| 4933428G20Rik | -0.480 | 2.758 | -3.547 | 0.002 | 0.041 | -1.525 |
| Gm10750       | -0.551 | 4.873 | -3.547 | 0.002 | 0.041 | -1.526 |
| Prss32        | 2.012  | 6.887 | 3.546  | 0.002 | 0.041 | -1.526 |
| Gm10052       | 1.132  | 7.351 | 3.545  | 0.002 | 0.041 | -1.528 |
| Tex101        | -0.501 | 3.188 | -3.545 | 0.002 | 0.041 | -1.529 |
| Muc4          | 2.712  | 7.314 | 3.541  | 0.002 | 0.042 | -1.538 |
| 4930402H05Rik | -0.452 | 2.891 | -3.540 | 0.002 | 0.042 | -1.539 |
| Fam98b        | 0.497  | 8.324 | 3.540  | 0.002 | 0.042 | -1.539 |
| Rbm26         | 0.960  | 6.616 | 3.540  | 0.002 | 0.042 | -1.539 |
| Alox5ap       | 1.313  | 8.370 | 3.540  | 0.002 | 0.042 | -1.539 |
| Dnajc4        | -0.419 | 7.530 | -3.540 | 0.002 | 0.042 | -1.540 |
| Gm10590       | -0.602 | 5.225 | -3.539 | 0.002 | 0.042 | -1.541 |
| 4933425M03Rik | -0.482 | 2.848 | -3.537 | 0.002 | 0.042 | -1.545 |
| 4933440J02Rik | -0.543 | 2.688 | -3.537 | 0.002 | 0.042 | -1.546 |
| Fam163b       | -0.550 | 4.251 | -3.537 | 0.002 | 0.042 | -1.546 |
| Frrs1         | 0.686  | 7.791 | 3.534  | 0.002 | 0.042 | -1.551 |

|               |        |        |        |       |       |        |
|---------------|--------|--------|--------|-------|-------|--------|
| Eef1g         | 0.432  | 11.919 | 3.532  | 0.003 | 0.042 | -1.555 |
| 9430027B09Rik | -0.448 | 3.274  | -3.531 | 0.003 | 0.042 | -1.557 |
| Dennd2c       | -0.568 | 4.286  | -3.530 | 0.003 | 0.042 | -1.560 |
| Hsbp111       | -1.662 | 4.168  | -3.530 | 0.003 | 0.042 | -1.561 |
| Kcne1         | -1.225 | 4.832  | -3.529 | 0.003 | 0.042 | -1.561 |
| Ppp1r1c       | -0.684 | 3.860  | -3.529 | 0.003 | 0.042 | -1.563 |
| 1700008003Rik | -0.449 | 3.188  | -3.529 | 0.003 | 0.042 | -1.563 |
| Gn13          | 0.808  | 8.439  | 3.527  | 0.003 | 0.042 | -1.565 |
| A230070E04Rik | -0.396 | 4.703  | -3.527 | 0.003 | 0.042 | -1.565 |
| Reep4         | 0.452  | 7.819  | 3.527  | 0.003 | 0.042 | -1.566 |
| LOC102641779  | -0.562 | 4.969  | -3.527 | 0.003 | 0.042 | -1.567 |
| Fos           | 1.501  | 10.673 | 3.526  | 0.003 | 0.042 | -1.568 |
| Acap1         | 0.759  | 5.845  | 3.526  | 0.003 | 0.042 | -1.569 |
| Ttc25         | -0.383 | 2.999  | -3.526 | 0.003 | 0.042 | -1.569 |
| Vars2         | -0.818 | 6.663  | -3.526 | 0.003 | 0.042 | -1.569 |
| 4930571K23Rik | -0.553 | 3.933  | -3.524 | 0.003 | 0.042 | -1.573 |
| Upk1a         | -0.488 | 5.147  | -3.523 | 0.003 | 0.042 | -1.575 |
| Sgms2         | -0.743 | 8.907  | -3.523 | 0.003 | 0.042 | -1.575 |
| Rsph3a        | -0.647 | 9.160  | -3.523 | 0.003 | 0.042 | -1.575 |
| Prm3          | -0.467 | 4.543  | -3.522 | 0.003 | 0.042 | -1.577 |
| Lhb           | -0.502 | 4.444  | -3.521 | 0.003 | 0.042 | -1.578 |
| Gtpbp4        | 0.987  | 6.773  | 3.521  | 0.003 | 0.042 | -1.579 |
| LOC102643254  | 0.548  | 9.216  | 3.520  | 0.003 | 0.042 | -1.580 |
| Tbc1d8        | -0.829 | 6.093  | -3.520 | 0.003 | 0.042 | -1.581 |
| Cblc          | 0.629  | 8.313  | 3.519  | 0.003 | 0.042 | -1.582 |
| Adil          | -0.929 | 8.599  | -3.519 | 0.003 | 0.042 | -1.582 |
| Kazald1       | -1.040 | 5.861  | -3.516 | 0.003 | 0.043 | -1.589 |
| Dnttip1       | 0.464  | 8.356  | 3.515  | 0.003 | 0.043 | -1.590 |
| AA516738      | -0.496 | 2.908  | -3.515 | 0.003 | 0.043 | -1.591 |
| Kcnab1        | -0.561 | 3.171  | -3.514 | 0.003 | 0.043 | -1.592 |
| Trank1        | -0.566 | 4.027  | -3.513 | 0.003 | 0.043 | -1.594 |
| Rhbdf1        | 0.927  | 7.392  | 3.513  | 0.003 | 0.043 | -1.596 |
| Sptb          | -0.496 | 4.722  | -3.512 | 0.003 | 0.043 | -1.598 |
| Mfsd2a        | 1.386  | 7.040  | 3.511  | 0.003 | 0.043 | -1.599 |
| BC037039      | -0.399 | 3.064  | -3.511 | 0.003 | 0.043 | -1.599 |
| Slc4a7        | 0.696  | 9.078  | 3.511  | 0.003 | 0.043 | -1.600 |
| 4933415A04Rik | -0.659 | 3.874  | -3.509 | 0.003 | 0.043 | -1.603 |
| Muc5ac        | -0.830 | 12.519 | -3.509 | 0.003 | 0.043 | -1.604 |
| Hist3h2ba     | -0.645 | 4.074  | -3.508 | 0.003 | 0.043 | -1.605 |
| Raly1         | -0.419 | 4.191  | -3.506 | 0.003 | 0.043 | -1.609 |
| Pde7a         | 0.952  | 5.931  | 3.506  | 0.003 | 0.043 | -1.610 |
| Acat1         | -0.852 | 7.509  | -3.505 | 0.003 | 0.043 | -1.612 |
| Chchd10       | -0.639 | 11.013 | -3.505 | 0.003 | 0.043 | -1.612 |
| A230046K03Rik | -0.849 | 7.093  | -3.505 | 0.003 | 0.043 | -1.612 |
| Fgd4          | -0.895 | 4.868  | -3.505 | 0.003 | 0.043 | -1.612 |
| Pdk2          | -0.866 | 7.267  | -3.504 | 0.003 | 0.043 | -1.613 |
| Lrat          | -0.468 | 2.650  | -3.504 | 0.003 | 0.043 | -1.613 |
| Acadsb        | -1.390 | 8.526  | -3.502 | 0.003 | 0.043 | -1.617 |
| Mogat2        | 1.618  | 8.143  | 3.502  | 0.003 | 0.043 | -1.617 |
| Sh2b1         | -0.460 | 3.208  | -3.502 | 0.003 | 0.043 | -1.618 |

|               |        |        |        |       |       |        |
|---------------|--------|--------|--------|-------|-------|--------|
| Mkl1          | -0.431 | 7.396  | -3.501 | 0.003 | 0.043 | -1.619 |
| C230073G13Rik | -0.455 | 3.299  | -3.500 | 0.003 | 0.043 | -1.621 |
| Ttyh3         | 0.638  | 6.588  | 3.500  | 0.003 | 0.043 | -1.621 |
| Bloc1s2       | 0.504  | 8.152  | 3.499  | 0.003 | 0.043 | -1.624 |
| Hagh          | -0.857 | 7.883  | -3.499 | 0.003 | 0.043 | -1.624 |
| Armc10        | 0.501  | 7.881  | 3.499  | 0.003 | 0.043 | -1.624 |
| Gml3826       | 0.414  | 12.072 | 3.498  | 0.003 | 0.043 | -1.625 |
| Lrrn4c1       | -0.502 | 4.322  | -3.497 | 0.003 | 0.043 | -1.627 |
| Mt3           | -0.430 | 5.178  | -3.497 | 0.003 | 0.043 | -1.628 |
| C2cd21        | -0.312 | 7.160  | -3.496 | 0.003 | 0.044 | -1.629 |
| LOC102633368  | -0.479 | 2.469  | -3.496 | 0.003 | 0.044 | -1.630 |
| Cdc42se2      | 0.433  | 7.709  | 3.496  | 0.003 | 0.044 | -1.631 |
| Aplg2         | 0.576  | 7.586  | 3.495  | 0.003 | 0.044 | -1.632 |
| 4930509E16Rik | -0.818 | 3.015  | -3.494 | 0.003 | 0.044 | -1.633 |
| 4930503B20Rik | -0.384 | 2.653  | -3.494 | 0.003 | 0.044 | -1.635 |
| Gstk1         | -1.233 | 9.583  | -3.493 | 0.003 | 0.044 | -1.635 |
| AW125324      | -0.585 | 3.316  | -3.493 | 0.003 | 0.044 | -1.637 |
| Elf1          | 0.528  | 7.909  | 3.492  | 0.003 | 0.044 | -1.637 |
| Vmnlr44       | -0.761 | 6.759  | -3.492 | 0.003 | 0.044 | -1.639 |
| Myzap         | -0.907 | 6.320  | -3.492 | 0.003 | 0.044 | -1.639 |
| Mettl1        | 1.203  | 7.197  | 3.492  | 0.003 | 0.044 | -1.639 |
| Aigl          | -0.767 | 8.135  | -3.491 | 0.003 | 0.044 | -1.640 |
| Hs3st6        | -0.513 | 4.779  | -3.491 | 0.003 | 0.044 | -1.641 |
| 2610307P16Rik | -0.401 | 2.669  | -3.490 | 0.003 | 0.044 | -1.643 |
| Erv3          | -0.462 | 3.071  | -3.489 | 0.003 | 0.044 | -1.644 |
| Tmem62        | -0.500 | 8.128  | -3.487 | 0.003 | 0.044 | -1.648 |
| Pgrmc1        | -0.519 | 10.296 | -3.487 | 0.003 | 0.044 | -1.649 |
| Fbxl15        | -0.522 | 5.705  | -3.487 | 0.003 | 0.044 | -1.649 |
| Ccl27a        | -0.747 | 4.431  | -3.485 | 0.003 | 0.044 | -1.652 |
| Car11         | -0.541 | 5.012  | -3.485 | 0.003 | 0.044 | -1.653 |
| Rcc2          | 0.524  | 7.937  | 3.483  | 0.003 | 0.044 | -1.657 |
| Stradb        | -1.053 | 7.567  | -3.483 | 0.003 | 0.044 | -1.657 |
| Eogt          | 0.401  | 6.472  | 3.482  | 0.003 | 0.044 | -1.659 |
| Wipf3         | -0.922 | 5.417  | -3.482 | 0.003 | 0.044 | -1.659 |
| Hmgb3         | 0.747  | 7.285  | 3.481  | 0.003 | 0.044 | -1.660 |
| BC022687      | -1.180 | 5.956  | -3.481 | 0.003 | 0.044 | -1.661 |
| BC018473      | -0.468 | 2.581  | -3.481 | 0.003 | 0.044 | -1.661 |
| Mfsd11        | -0.514 | 4.666  | -3.481 | 0.003 | 0.044 | -1.661 |
| B230118H07Rik | -1.096 | 7.723  | -3.480 | 0.003 | 0.044 | -1.662 |
| Snap47        | -0.482 | 7.384  | -3.480 | 0.003 | 0.044 | -1.662 |
| D630032N06Rik | -0.652 | 5.137  | -3.480 | 0.003 | 0.044 | -1.663 |
| Gpatch4       | 0.918  | 5.538  | 3.479  | 0.003 | 0.044 | -1.665 |
| Fam46c        | -1.926 | 5.741  | -3.479 | 0.003 | 0.044 | -1.665 |
| Sp8           | -0.370 | 2.695  | -3.477 | 0.003 | 0.044 | -1.669 |
| Zfp60         | -0.510 | 3.187  | -3.477 | 0.003 | 0.044 | -1.670 |
| D2hgdh        | -0.441 | 5.241  | -3.475 | 0.003 | 0.044 | -1.673 |
| Galt          | -0.470 | 8.234  | -3.473 | 0.003 | 0.045 | -1.677 |
| Tmem161b      | -0.664 | 8.176  | -3.472 | 0.003 | 0.045 | -1.678 |
| Arpclb        | 1.039  | 9.959  | 3.472  | 0.003 | 0.045 | -1.680 |
| C1ra          | 2.408  | 7.136  | 3.471  | 0.003 | 0.045 | -1.680 |

|               |        |        |        |       |       |        |
|---------------|--------|--------|--------|-------|-------|--------|
| Olfir70       | -0.536 | 3.622  | -3.470 | 0.003 | 0.045 | -1.682 |
| Pld6          | -1.544 | 4.695  | -3.468 | 0.003 | 0.045 | -1.687 |
| LOC100043315  | -0.366 | 2.494  | -3.467 | 0.003 | 0.045 | -1.689 |
| Osbp11a       | -1.338 | 6.676  | -3.467 | 0.003 | 0.045 | -1.690 |
| Slc25a1       | 0.467  | 10.315 | 3.467  | 0.003 | 0.045 | -1.690 |
| Rassf5        | 0.947  | 4.570  | 3.467  | 0.003 | 0.045 | -1.690 |
| Ell3          | -0.978 | 4.858  | -3.466 | 0.003 | 0.045 | -1.692 |
| Cd52          | 2.364  | 7.654  | 3.466  | 0.003 | 0.045 | -1.692 |
| Leng9         | -0.364 | 4.834  | -3.466 | 0.003 | 0.045 | -1.692 |
| Asb11         | -1.210 | 5.621  | -3.466 | 0.003 | 0.045 | -1.692 |
| Gga2          | -1.792 | 9.010  | -3.465 | 0.003 | 0.045 | -1.693 |
| 2410089E03Rik | -0.601 | 5.062  | -3.463 | 0.003 | 0.045 | -1.697 |
| Cds1          | -0.912 | 8.004  | -3.463 | 0.003 | 0.045 | -1.698 |
| Rilp12        | 0.997  | 8.226  | 3.461  | 0.003 | 0.045 | -1.702 |
| Cflar         | 0.510  | 7.072  | 3.461  | 0.003 | 0.045 | -1.702 |
| St3gal3       | -0.628 | 4.076  | -3.461 | 0.003 | 0.045 | -1.702 |
| Dnajc12       | -0.977 | 7.908  | -3.460 | 0.003 | 0.045 | -1.704 |
| Proser2       | 0.700  | 6.724  | 3.459  | 0.003 | 0.045 | -1.705 |
| Grin1         | -0.572 | 6.111  | -3.459 | 0.003 | 0.045 | -1.705 |
| Nfkbid        | 0.545  | 5.710  | 3.459  | 0.003 | 0.045 | -1.707 |
| Carhsp1       | -0.625 | 7.928  | -3.458 | 0.003 | 0.045 | -1.707 |
| Gipc3         | -0.543 | 3.876  | -3.458 | 0.003 | 0.045 | -1.708 |
| LOC102640476  | -0.551 | 4.211  | -3.457 | 0.003 | 0.045 | -1.709 |
| Wdr96         | -0.524 | 2.727  | -3.457 | 0.003 | 0.045 | -1.709 |
| Il18r1        | 1.350  | 7.005  | 3.454  | 0.003 | 0.046 | -1.716 |
| Cabs1         | -0.499 | 3.029  | -3.453 | 0.003 | 0.046 | -1.719 |
| Eif3c         | -0.575 | 10.667 | -3.452 | 0.003 | 0.046 | -1.719 |
| Nr2c2ap       | 0.438  | 7.353  | 3.452  | 0.003 | 0.046 | -1.721 |
| Cox8a         | -0.387 | 11.406 | -3.451 | 0.003 | 0.046 | -1.721 |
| Edc4          | 0.495  | 7.455  | 3.451  | 0.003 | 0.046 | -1.722 |
| Krt20         | 1.201  | 11.064 | 3.450  | 0.003 | 0.046 | -1.723 |
| Tnn           | -1.613 | 7.060  | -3.450 | 0.003 | 0.046 | -1.724 |
| Adipor2       | -0.482 | 10.621 | -3.450 | 0.003 | 0.046 | -1.725 |
| Rdh16         | -0.623 | 6.085  | -3.450 | 0.003 | 0.046 | -1.725 |
| Dcaf13        | 0.557  | 9.595  | 3.449  | 0.003 | 0.046 | -1.727 |
| Cntln         | -0.595 | 4.719  | -3.449 | 0.003 | 0.046 | -1.727 |
| Mef2a         | -0.644 | 5.612  | -3.449 | 0.003 | 0.046 | -1.727 |
| Cpm           | -1.412 | 7.670  | -3.449 | 0.003 | 0.046 | -1.727 |
| Slco1c1       | -0.479 | 2.873  | -3.448 | 0.003 | 0.046 | -1.727 |
| Syp           | -1.106 | 4.714  | -3.448 | 0.003 | 0.046 | -1.728 |
| Mug-ps1       | -2.595 | 4.687  | -3.448 | 0.003 | 0.046 | -1.728 |
| Rab15         | 1.053  | 7.868  | 3.447  | 0.003 | 0.046 | -1.731 |
| Casq2         | -0.569 | 4.357  | -3.447 | 0.003 | 0.046 | -1.731 |
| AW124847      | -0.520 | 5.885  | -3.447 | 0.003 | 0.046 | -1.731 |
| Gale          | 0.667  | 10.099 | 3.446  | 0.003 | 0.046 | -1.733 |
| Ube2b         | -0.582 | 8.343  | -3.446 | 0.003 | 0.046 | -1.733 |
| 1700104B16Rik | -0.590 | 3.120  | -3.445 | 0.003 | 0.046 | -1.734 |
| G1ra2         | -0.328 | 2.409  | -3.444 | 0.003 | 0.046 | -1.736 |
| Zbtb8b        | -0.585 | 3.319  | -3.443 | 0.003 | 0.046 | -1.738 |
| Ub15          | -0.401 | 8.069  | -3.442 | 0.003 | 0.046 | -1.741 |

|               |        |        |        |       |       |        |
|---------------|--------|--------|--------|-------|-------|--------|
| 3110035E14Rik | -0.492 | 3.258  | -3.440 | 0.003 | 0.046 | -1.745 |
| Pcdh8         | -0.469 | 2.545  | -3.439 | 0.003 | 0.046 | -1.746 |
| Ap3m2         | -0.513 | 5.055  | -3.439 | 0.003 | 0.046 | -1.747 |
| Farsa         | 0.640  | 7.561  | 3.438  | 0.003 | 0.046 | -1.749 |
| Rnf165        | -0.593 | 3.734  | -3.437 | 0.003 | 0.046 | -1.751 |
| Prrg1         | -0.601 | 5.063  | -3.437 | 0.003 | 0.046 | -1.752 |
| Bail          | -0.604 | 5.214  | -3.436 | 0.003 | 0.046 | -1.752 |
| Snapc1        | 0.658  | 7.021  | 3.436  | 0.003 | 0.046 | -1.752 |
| Vamp5         | 0.883  | 7.125  | 3.435  | 0.003 | 0.046 | -1.755 |
| Hpvc-ps       | -0.578 | 3.095  | -3.434 | 0.003 | 0.046 | -1.756 |
| Unc93b1       | 1.028  | 7.068  | 3.434  | 0.003 | 0.046 | -1.757 |
| 4930568A13Rik | -0.441 | 2.298  | -3.433 | 0.003 | 0.046 | -1.758 |
| Peg3          | -0.793 | 6.635  | -3.432 | 0.003 | 0.047 | -1.761 |
| Slc25a30      | -0.641 | 5.919  | -3.432 | 0.003 | 0.047 | -1.761 |
| 1700029P11Rik | -0.505 | 4.383  | -3.432 | 0.003 | 0.047 | -1.762 |
| Aqp4          | -2.451 | 5.492  | -3.431 | 0.003 | 0.047 | -1.763 |
| Tbcd4         | -0.722 | 5.255  | -3.430 | 0.003 | 0.047 | -1.765 |
| Map7d1        | 1.080  | 6.862  | 3.430  | 0.003 | 0.047 | -1.765 |
| Gm2102        | -0.451 | 2.690  | -3.429 | 0.003 | 0.047 | -1.766 |
| El12          | -0.757 | 9.434  | -3.429 | 0.003 | 0.047 | -1.767 |
| Bax           | 0.619  | 8.011  | 3.429  | 0.003 | 0.047 | -1.767 |
| 1110032A03Rik | -1.079 | 7.466  | -3.428 | 0.003 | 0.047 | -1.768 |
| Gm10125       | -0.465 | 6.445  | -3.428 | 0.003 | 0.047 | -1.768 |
| Pdia5         | 0.741  | 8.640  | 3.428  | 0.003 | 0.047 | -1.770 |
| 1700010B08Rik | -0.444 | 4.163  | -3.427 | 0.003 | 0.047 | -1.771 |
| Grk1          | -0.519 | 3.159  | -3.426 | 0.003 | 0.047 | -1.773 |
| E130304I02Rik | -0.448 | 3.712  | -3.426 | 0.003 | 0.047 | -1.773 |
| Ctsc          | 1.020  | 10.363 | 3.426  | 0.003 | 0.047 | -1.773 |
| Rbm14         | 0.826  | 8.657  | 3.425  | 0.003 | 0.047 | -1.774 |
| 2210011C24Rik | -1.637 | 5.829  | -3.425 | 0.003 | 0.047 | -1.776 |
| Fhdcl         | -0.488 | 8.522  | -3.424 | 0.003 | 0.047 | -1.777 |
| Il2rg         | 2.191  | 6.406  | 3.424  | 0.003 | 0.047 | -1.777 |
| Pgam2         | -0.426 | 4.033  | -3.424 | 0.003 | 0.047 | -1.777 |
| Rnft2         | -0.452 | 3.379  | -3.424 | 0.003 | 0.047 | -1.778 |
| Ostm1         | -0.439 | 7.516  | -3.423 | 0.003 | 0.047 | -1.779 |
| AK077405      | -0.414 | 3.329  | -3.421 | 0.003 | 0.047 | -1.784 |
| Morn5         | -0.514 | 3.658  | -3.421 | 0.003 | 0.047 | -1.784 |
| Emilin3       | -0.452 | 6.012  | -3.420 | 0.003 | 0.047 | -1.786 |
| Ccdc150       | -0.454 | 5.289  | -3.417 | 0.003 | 0.047 | -1.791 |
| Tcf24         | -0.841 | 3.678  | -3.416 | 0.003 | 0.047 | -1.793 |
| Evi5l         | -0.584 | 4.908  | -3.416 | 0.003 | 0.047 | -1.793 |
| 1700122011Rik | -0.528 | 4.489  | -3.416 | 0.003 | 0.047 | -1.793 |
| Lphn2         | 0.546  | 8.051  | 3.416  | 0.003 | 0.047 | -1.794 |
| Gstt2         | 0.658  | 8.070  | 3.415  | 0.003 | 0.047 | -1.796 |
| Spsb1         | 0.979  | 5.949  | 3.414  | 0.003 | 0.047 | -1.797 |
| Adamdec1      | 0.791  | 8.889  | 3.414  | 0.003 | 0.047 | -1.798 |
| Ptgds         | -0.664 | 6.639  | -3.413 | 0.003 | 0.047 | -1.799 |
| Atp5h         | -0.523 | 11.872 | -3.413 | 0.003 | 0.047 | -1.800 |
| Fbxw24        | -0.573 | 2.935  | -3.413 | 0.003 | 0.047 | -1.801 |
| Papss1        | 0.420  | 9.915  | 3.412  | 0.003 | 0.047 | -1.802 |

|               |        |        |        |       |       |        |
|---------------|--------|--------|--------|-------|-------|--------|
| Hoxd3         | -0.676 | 3.765  | -3.411 | 0.003 | 0.047 | -1.803 |
| AK079912      | -0.904 | 4.244  | -3.411 | 0.003 | 0.047 | -1.804 |
| Slitrk5       | -0.476 | 3.215  | -3.411 | 0.003 | 0.047 | -1.805 |
| Npb           | -1.155 | 6.225  | -3.410 | 0.003 | 0.047 | -1.807 |
| Clip1         | -1.525 | 2.941  | -3.410 | 0.003 | 0.047 | -1.807 |
| Slc2a4        | -1.437 | 7.163  | -3.409 | 0.003 | 0.047 | -1.807 |
| 1700065I16Rik | -0.522 | 3.825  | -3.409 | 0.003 | 0.047 | -1.808 |
| Selplg        | 1.227  | 5.518  | 3.409  | 0.003 | 0.047 | -1.808 |
| Cpz           | -0.536 | 3.600  | -3.409 | 0.003 | 0.047 | -1.809 |
| Ncapg2        | 0.710  | 7.675  | 3.408  | 0.003 | 0.047 | -1.809 |
| Mki67         | 0.789  | 9.752  | 3.408  | 0.003 | 0.048 | -1.811 |
| Cln3          | -0.809 | 6.350  | -3.407 | 0.003 | 0.048 | -1.811 |
| Plin4         | -0.884 | 5.028  | -3.407 | 0.003 | 0.048 | -1.812 |
| Chmpla        | 0.507  | 9.136  | 3.407  | 0.003 | 0.048 | -1.812 |
| Tmprss4       | 0.859  | 8.817  | 3.405  | 0.003 | 0.048 | -1.817 |
| Urb2          | 0.475  | 6.724  | 3.403  | 0.003 | 0.048 | -1.820 |
| Eml2          | 1.116  | 6.528  | 3.403  | 0.003 | 0.048 | -1.821 |
| Sspo          | -0.670 | 5.544  | -3.402 | 0.003 | 0.048 | -1.821 |
| Srcrb4d       | -0.498 | 6.231  | -3.402 | 0.003 | 0.048 | -1.823 |
| Hist1h2bp     | -0.454 | 4.702  | -3.401 | 0.003 | 0.048 | -1.825 |
| Fam183b       | -0.438 | 4.416  | -3.400 | 0.003 | 0.048 | -1.825 |
| Csdc2         | -0.541 | 3.818  | -3.399 | 0.003 | 0.048 | -1.829 |
| Afp           | 1.778  | 4.696  | 3.397  | 0.003 | 0.048 | -1.832 |
| Ptger3        | -0.552 | 2.933  | -3.396 | 0.003 | 0.048 | -1.835 |
| Smarcad1      | -0.518 | 6.657  | -3.396 | 0.003 | 0.048 | -1.835 |
| Tacr2         | -0.537 | 5.465  | -3.395 | 0.003 | 0.048 | -1.837 |
| Elmo2         | -0.547 | 4.874  | -3.394 | 0.003 | 0.048 | -1.839 |
| Bpifb1        | 1.928  | 11.389 | 3.394  | 0.003 | 0.048 | -1.839 |
| Kcnj15        | -1.707 | 9.169  | -3.394 | 0.003 | 0.048 | -1.839 |
| Gstm7         | -0.575 | 6.733  | -3.393 | 0.003 | 0.048 | -1.840 |
| B3galt5       | -0.918 | 6.043  | -3.393 | 0.003 | 0.048 | -1.840 |
| Fbxl21        | -0.594 | 3.817  | -3.393 | 0.003 | 0.048 | -1.840 |
| Tmem5         | -0.501 | 8.586  | -3.393 | 0.003 | 0.048 | -1.840 |
| Man1c1        | -0.643 | 5.861  | -3.392 | 0.003 | 0.048 | -1.842 |
| Farsb         | 0.471  | 8.794  | 3.392  | 0.003 | 0.048 | -1.843 |
| B230308N11Rik | 0.494  | 7.888  | 3.391  | 0.003 | 0.048 | -1.844 |
| L2hgdh        | -0.643 | 7.368  | -3.391 | 0.003 | 0.048 | -1.846 |
| Aldh5a1       | -0.740 | 6.471  | -3.390 | 0.003 | 0.049 | -1.847 |
| Nrtn          | -1.233 | 6.679  | -3.390 | 0.003 | 0.049 | -1.847 |
| Fbln2         | -1.068 | 5.057  | -3.389 | 0.003 | 0.049 | -1.848 |
| Tsix          | -0.429 | 2.730  | -3.389 | 0.003 | 0.049 | -1.849 |
| Dnajc28       | -0.811 | 4.160  | -3.389 | 0.003 | 0.049 | -1.849 |
| Pcbd1         | -0.660 | 9.574  | -3.389 | 0.003 | 0.049 | -1.850 |
| AI132709      | -0.419 | 2.766  | -3.388 | 0.003 | 0.049 | -1.850 |
| Apol7c        | 2.238  | 5.026  | 3.388  | 0.003 | 0.049 | -1.851 |
| Pgd           | 0.488  | 10.867 | 3.387  | 0.003 | 0.049 | -1.853 |
| Rbbp5         | 0.413  | 7.398  | 3.387  | 0.003 | 0.049 | -1.853 |
| 1700007F19Rik | -0.470 | 2.901  | -3.387 | 0.003 | 0.049 | -1.854 |
| 9530056K15Rik | -0.535 | 3.185  | -3.385 | 0.003 | 0.049 | -1.856 |
| Lix1          | -0.655 | 5.802  | -3.384 | 0.003 | 0.049 | -1.859 |



|               |        |        |        |       |       |        |
|---------------|--------|--------|--------|-------|-------|--------|
| 5330423I11Rik | -0.462 | 2.687  | -3.383 | 0.003 | 0.049 | -1.861 |
| D8Ert572e     | -0.382 | 2.285  | -3.383 | 0.003 | 0.049 | -1.862 |
| Plk5          | -0.388 | 5.297  | -3.382 | 0.003 | 0.049 | -1.862 |
| Gm5817        | -0.657 | 5.408  | -3.382 | 0.003 | 0.049 | -1.862 |
| Slc5a8        | -0.600 | 3.042  | -3.382 | 0.003 | 0.049 | -1.864 |
| Slc39a2       | -0.640 | 3.581  | -3.382 | 0.003 | 0.049 | -1.864 |
| Ntan1         | -0.721 | 7.898  | -3.381 | 0.003 | 0.049 | -1.864 |
| Arhgap35      | -0.669 | 7.047  | -3.381 | 0.003 | 0.049 | -1.865 |
| Capn9         | -1.376 | 9.286  | -3.381 | 0.003 | 0.049 | -1.865 |
| St8sia4       | 1.137  | 5.590  | 3.381  | 0.003 | 0.049 | -1.866 |
| Tmem176a      | 1.156  | 9.024  | 3.381  | 0.003 | 0.049 | -1.866 |
| Hdac8         | 0.617  | 3.924  | 3.380  | 0.003 | 0.049 | -1.866 |
| Gnat2         | -0.580 | 4.196  | -3.379 | 0.003 | 0.049 | -1.868 |
| Prmt8         | -0.545 | 2.760  | -3.379 | 0.004 | 0.049 | -1.870 |
| Calcoc1       | -0.632 | 5.238  | -3.378 | 0.004 | 0.049 | -1.870 |
| Sdhb          | -0.560 | 11.157 | -3.377 | 0.004 | 0.049 | -1.873 |
| AU045717      | -0.445 | 3.561  | -3.377 | 0.004 | 0.049 | -1.873 |
| Slc25a4       | -1.099 | 9.442  | -3.377 | 0.004 | 0.049 | -1.874 |
| Hba-a1        | -0.417 | 2.915  | -3.377 | 0.004 | 0.049 | -1.874 |
| Bet11         | 0.641  | 7.102  | 3.377  | 0.004 | 0.049 | -1.874 |
| Lrrc24        | -0.727 | 3.285  | -3.377 | 0.004 | 0.049 | -1.874 |
| Htr2c         | -0.509 | 2.670  | -3.376 | 0.004 | 0.049 | -1.875 |
| Gm10700       | -0.575 | 2.975  | -3.376 | 0.004 | 0.049 | -1.875 |
| Wfdc2         | 1.804  | 9.446  | 3.376  | 0.004 | 0.049 | -1.876 |
| Ifrd2         | 0.514  | 7.735  | 3.375  | 0.004 | 0.049 | -1.877 |
| Adcy1         | -0.427 | 2.950  | -3.374 | 0.004 | 0.049 | -1.879 |
| Hbegf         | 1.479  | 7.460  | 3.374  | 0.004 | 0.049 | -1.880 |
| 1700014B07Rik | -0.546 | 3.951  | -3.374 | 0.004 | 0.049 | -1.880 |
| Nxph4         | -0.687 | 6.823  | -3.373 | 0.004 | 0.049 | -1.881 |
| 2500002B13Rik | -0.702 | 5.721  | -3.372 | 0.004 | 0.049 | -1.883 |
| Nlrc3         | -0.358 | 3.499  | -3.372 | 0.004 | 0.049 | -1.883 |
| Pcid2         | 0.589  | 6.817  | 3.372  | 0.004 | 0.049 | -1.884 |
| Snrpn         | -0.734 | 11.584 | -3.371 | 0.004 | 0.049 | -1.886 |
| Bmpr1b        | -0.600 | 2.937  | -3.371 | 0.004 | 0.049 | -1.886 |
| Magix         | -0.866 | 4.837  | -3.370 | 0.004 | 0.049 | -1.888 |
| Tssk2         | -0.432 | 3.074  | -3.369 | 0.004 | 0.049 | -1.890 |
| Bcl2l14       | 0.519  | 8.465  | 3.368  | 0.004 | 0.049 | -1.892 |
| Cntf          | -0.462 | 5.271  | -3.367 | 0.004 | 0.049 | -1.893 |
| Lmb1          | 0.759  | 4.879  | 3.367  | 0.004 | 0.049 | -1.893 |
| Usp54         | -0.537 | 6.581  | -3.366 | 0.004 | 0.049 | -1.895 |
| Rom1          | -0.462 | 4.615  | -3.366 | 0.004 | 0.049 | -1.895 |
| Garnl3        | -0.402 | 3.715  | -3.366 | 0.004 | 0.049 | -1.897 |
| Faah          | -0.506 | 6.611  | -3.365 | 0.004 | 0.049 | -1.898 |
| Slitrk3       | -0.361 | 3.013  | -3.364 | 0.004 | 0.050 | -1.899 |
| Gm4024        | -0.389 | 10.962 | -3.364 | 0.004 | 0.050 | -1.901 |
| Ndufa7        | -0.426 | 10.261 | -3.363 | 0.004 | 0.050 | -1.902 |
| Peak1         | 0.437  | 6.432  | 3.363  | 0.004 | 0.050 | -1.902 |
| Anapc1        | 0.370  | 7.893  | 3.362  | 0.004 | 0.050 | -1.903 |
| Cdk10         | 0.537  | 6.555  | 3.362  | 0.004 | 0.050 | -1.903 |
| Hivep1        | 0.514  | 5.765  | 3.362  | 0.004 | 0.050 | -1.903 |

|               |        |       |        |       |       |        |
|---------------|--------|-------|--------|-------|-------|--------|
| Foxj1         | -0.419 | 4.017 | -3.362 | 0.004 | 0.050 | -1.904 |
| Car1          | -0.359 | 3.560 | -3.361 | 0.004 | 0.050 | -1.906 |
| Rab3a         | -0.490 | 7.297 | -3.361 | 0.004 | 0.050 | -1.906 |
| Atad2b        | 0.441  | 8.128 | 3.361  | 0.004 | 0.050 | -1.906 |
| Foxn3         | -0.611 | 7.305 | -3.361 | 0.004 | 0.050 | -1.907 |
| Irf1          | 2.006  | 9.890 | 3.359  | 0.004 | 0.050 | -1.910 |
| 4921525D07Rik | -0.471 | 4.139 | -3.359 | 0.004 | 0.050 | -1.910 |
| C530025M09Rik | -0.401 | 3.387 | -3.359 | 0.004 | 0.050 | -1.911 |
| 4930432K21Rik | -0.439 | 3.520 | -3.359 | 0.004 | 0.050 | -1.911 |
| 6330407A03Rik | 1.596  | 5.728 | 3.357  | 0.004 | 0.050 | -1.914 |
| Ptprd         | -0.957 | 7.299 | -3.357 | 0.004 | 0.050 | -1.914 |
| 4930432B10Rik | -0.447 | 3.536 | -3.357 | 0.004 | 0.050 | -1.915 |
| D1Ertd185e    | -0.484 | 3.440 | -3.356 | 0.004 | 0.050 | -1.916 |
| Ube2r2        | 0.579  | 8.358 | 3.354  | 0.004 | 0.050 | -1.920 |
| 2010309G21Rik | 3.419  | 6.874 | 3.354  | 0.004 | 0.050 | -1.921 |
| Nupr1         | -1.479 | 9.705 | -3.353 | 0.004 | 0.050 | -1.923 |
| Tex9          | -0.462 | 2.964 | -3.352 | 0.004 | 0.050 | -1.924 |
| Cd320         | -0.964 | 7.905 | -3.352 | 0.004 | 0.050 | -1.924 |
| Ispd          | -0.785 | 4.201 | -3.351 | 0.004 | 0.050 | -1.926 |
| Tmem86a       | -1.371 | 7.530 | -3.351 | 0.004 | 0.050 | -1.926 |
| Slc25a11      | -0.415 | 8.855 | -3.350 | 0.004 | 0.050 | -1.928 |
| Cadps2        | 0.501  | 8.055 | 3.350  | 0.004 | 0.050 | -1.928 |
| Prss51        | -0.492 | 4.983 | -3.349 | 0.004 | 0.050 | -1.930 |
| Ecm2          | -0.576 | 3.223 | -3.349 | 0.004 | 0.050 | -1.930 |
| Ifi30         | -0.363 | 5.143 | -3.348 | 0.004 | 0.050 | -1.932 |
| S100a14       | 1.411  | 8.929 | 3.348  | 0.004 | 0.050 | -1.933 |
| Ptpn12        | 0.868  | 8.724 | 3.346  | 0.004 | 0.050 | -1.937 |
| Acot13        | -0.876 | 9.109 | -3.346 | 0.004 | 0.050 | -1.937 |
| Lrriq3        | -0.381 | 2.305 | -3.345 | 0.004 | 0.050 | -1.938 |
| Slc44a2       | -0.459 | 8.282 | -3.345 | 0.004 | 0.050 | -1.938 |
| Ak5           | -0.357 | 5.068 | -3.344 | 0.004 | 0.051 | -1.940 |
| Glb112        | -0.723 | 5.812 | -3.344 | 0.004 | 0.051 | -1.941 |
| Il4ra         | 0.708  | 7.236 | 3.344  | 0.004 | 0.051 | -1.941 |
| AI464131      | -1.007 | 5.211 | -3.342 | 0.004 | 0.051 | -1.944 |
| Scfd1         | -0.571 | 3.464 | -3.342 | 0.004 | 0.051 | -1.945 |
| Dicer1        | 0.502  | 6.974 | 3.341  | 0.004 | 0.051 | -1.946 |
| Fah           | -1.060 | 6.786 | -3.341 | 0.004 | 0.051 | -1.947 |
| Dpp4          | 1.136  | 5.370 | 3.341  | 0.004 | 0.051 | -1.947 |
| Egfem1        | -0.489 | 2.699 | -3.338 | 0.004 | 0.051 | -1.954 |
| Krtap7-1      | -0.624 | 2.958 | -3.338 | 0.004 | 0.051 | -1.954 |
| Spred2        | -0.355 | 5.920 | -3.337 | 0.004 | 0.051 | -1.954 |
| Paqr7         | -1.024 | 5.617 | -3.337 | 0.004 | 0.051 | -1.955 |
| Ppplr16b      | -0.531 | 3.922 | -3.337 | 0.004 | 0.051 | -1.955 |
| Fam187a       | -0.559 | 3.273 | -3.337 | 0.004 | 0.051 | -1.955 |
| Syt4          | -0.456 | 2.437 | -3.336 | 0.004 | 0.051 | -1.957 |
| Spata25       | -0.487 | 4.063 | -3.336 | 0.004 | 0.051 | -1.957 |
| Tmem106a      | 0.803  | 6.598 | 3.336  | 0.004 | 0.051 | -1.958 |
| Tnfaip1       | 0.408  | 9.616 | 3.335  | 0.004 | 0.051 | -1.959 |
| Lrrc3b        | -1.070 | 4.275 | -3.333 | 0.004 | 0.051 | -1.962 |
| C2cd5         | 0.573  | 5.947 | 3.333  | 0.004 | 0.051 | -1.962 |

|               |        |       |        |       |       |        |
|---------------|--------|-------|--------|-------|-------|--------|
| Gab1          | -0.629 | 7.673 | -3.332 | 0.004 | 0.051 | -1.965 |
| Cldn12        | 0.451  | 9.137 | 3.331  | 0.004 | 0.051 | -1.966 |
| Avpr1a        | -0.459 | 3.441 | -3.331 | 0.004 | 0.051 | -1.966 |
| Tmed8         | -0.456 | 3.822 | -3.331 | 0.004 | 0.051 | -1.967 |
| Sbk1          | -0.724 | 5.173 | -3.331 | 0.004 | 0.051 | -1.967 |
| 2010007E15Rik | -0.484 | 3.038 | -3.331 | 0.004 | 0.051 | -1.968 |
| Krt42         | -0.479 | 3.393 | -3.330 | 0.004 | 0.051 | -1.970 |
| Piezo2        | -0.449 | 5.296 | -3.329 | 0.004 | 0.051 | -1.970 |
| Zfhx2os       | -0.745 | 3.680 | -3.329 | 0.004 | 0.051 | -1.970 |
| Gm11532       | -0.392 | 3.709 | -3.329 | 0.004 | 0.051 | -1.971 |
| Hibadh        | -1.199 | 9.824 | -3.329 | 0.004 | 0.051 | -1.971 |
| Zbtb3         | -0.615 | 4.248 | -3.329 | 0.004 | 0.051 | -1.971 |
| 2610020H08Rik | -0.423 | 2.423 | -3.329 | 0.004 | 0.051 | -1.971 |
| Hmgal         | 1.020  | 9.064 | 3.329  | 0.004 | 0.051 | -1.972 |
| D4Ertd117e    | -0.482 | 7.094 | -3.329 | 0.004 | 0.051 | -1.972 |
| Kcne3         | 3.173  | 8.061 | 3.329  | 0.004 | 0.051 | -1.972 |
| AU022746      | -0.589 | 3.774 | -3.327 | 0.004 | 0.051 | -1.974 |
| Selenbp1      | -0.587 | 8.691 | -3.326 | 0.004 | 0.051 | -1.977 |
| 9630013D21Rik | -0.472 | 2.461 | -3.325 | 0.004 | 0.051 | -1.980 |
| Tdrkh         | -0.733 | 4.148 | -3.325 | 0.004 | 0.051 | -1.980 |
| C030014009Rik | -0.495 | 3.185 | -3.324 | 0.004 | 0.051 | -1.980 |
| Hrc           | -0.367 | 4.220 | -3.324 | 0.004 | 0.051 | -1.981 |
| Zfp580        | -0.469 | 5.772 | -3.324 | 0.004 | 0.051 | -1.981 |
| Ict1          | -0.587 | 3.791 | -3.323 | 0.004 | 0.052 | -1.983 |
| Mafg          | 0.856  | 7.098 | 3.323  | 0.004 | 0.052 | -1.983 |
| Wdr25         | -0.511 | 4.481 | -3.323 | 0.004 | 0.052 | -1.983 |
| Rnf133        | -0.406 | 2.513 | -3.321 | 0.004 | 0.052 | -1.986 |
| Neat1         | -0.588 | 6.079 | -3.321 | 0.004 | 0.052 | -1.987 |
| Ap1s1         | 0.404  | 9.642 | 3.321  | 0.004 | 0.052 | -1.988 |
| Drd3          | -0.469 | 3.132 | -3.319 | 0.004 | 0.052 | -1.991 |
| C80678        | -0.425 | 2.732 | -3.319 | 0.004 | 0.052 | -1.991 |
| Lamp3         | 0.684  | 8.234 | 3.319  | 0.004 | 0.052 | -1.992 |
| Cd38          | 2.395  | 7.122 | 3.319  | 0.004 | 0.052 | -1.992 |
| A530016L24Rik | -0.547 | 3.013 | -3.318 | 0.004 | 0.052 | -1.994 |
| Accs1         | -0.447 | 2.820 | -3.317 | 0.004 | 0.052 | -1.995 |
| Fam189a2      | -0.856 | 6.412 | -3.317 | 0.004 | 0.052 | -1.995 |
| Rab11fip5     | -0.963 | 4.159 | -3.317 | 0.004 | 0.052 | -1.996 |
| Gm10334       | -0.904 | 3.287 | -3.317 | 0.004 | 0.052 | -1.996 |
| Efna5         | -0.578 | 4.617 | -3.317 | 0.004 | 0.052 | -1.997 |
| Zfp330        | 0.525  | 8.461 | 3.316  | 0.004 | 0.052 | -1.998 |
| AW061147      | -0.520 | 4.487 | -3.315 | 0.004 | 0.052 | -1.999 |
| Ankub1        | -0.535 | 4.623 | -3.315 | 0.004 | 0.052 | -2.001 |
| Pdelc         | -0.614 | 3.782 | -3.314 | 0.004 | 0.052 | -2.003 |
| Col7a1        | -0.692 | 5.322 | -3.313 | 0.004 | 0.052 | -2.003 |
| 4933428M09Rik | -0.567 | 4.260 | -3.313 | 0.004 | 0.052 | -2.004 |
| Aars          | 0.772  | 7.672 | 3.312  | 0.004 | 0.052 | -2.005 |
| 2200002J24Rik | -1.818 | 6.618 | -3.312 | 0.004 | 0.052 | -2.006 |
| Slc36a1       | -0.421 | 6.575 | -3.312 | 0.004 | 0.052 | -2.006 |
| Hand1         | -0.414 | 5.223 | -3.312 | 0.004 | 0.052 | -2.007 |
| Pdcd1         | -0.310 | 2.850 | -3.312 | 0.004 | 0.052 | -2.007 |

|               |        |        |        |       |       |        |
|---------------|--------|--------|--------|-------|-------|--------|
| Cacng2        | -0.760 | 4.733  | -3.311 | 0.004 | 0.052 | -2.007 |
| Arhgef19      | -0.618 | 5.360  | -3.311 | 0.004 | 0.052 | -2.008 |
| Kril          | 0.416  | 6.872  | 3.310  | 0.004 | 0.052 | -2.010 |
| Try4          | -4.356 | 6.285  | -3.309 | 0.004 | 0.052 | -2.012 |
| Rps28         | 0.276  | 13.307 | 3.308  | 0.004 | 0.052 | -2.013 |
| Lpo           | -0.587 | 3.899  | -3.308 | 0.004 | 0.052 | -2.014 |
| 2810457G06Rik | -0.457 | 4.934  | -3.308 | 0.004 | 0.052 | -2.014 |
| 9630050P21Rik | 0.654  | 5.017  | 3.308  | 0.004 | 0.052 | -2.014 |
| Ttc39d        | -0.408 | 2.967  | -3.307 | 0.004 | 0.052 | -2.015 |
| Naa25         | 0.659  | 7.775  | 3.307  | 0.004 | 0.052 | -2.015 |
| Rbbp9         | -0.951 | 7.102  | -3.307 | 0.004 | 0.052 | -2.016 |
| Gm17344       | 0.489  | 4.338  | 3.307  | 0.004 | 0.052 | -2.016 |
| Fut1          | -0.618 | 3.787  | -3.306 | 0.004 | 0.052 | -2.019 |
| Fam78b        | -0.731 | 5.093  | -3.305 | 0.004 | 0.052 | -2.020 |
| Ptprg         | 1.079  | 5.360  | 3.305  | 0.004 | 0.052 | -2.020 |
| Cdk5r1        | -0.558 | 3.719  | -3.305 | 0.004 | 0.052 | -2.021 |
| Rpp21         | -0.415 | 8.698  | -3.305 | 0.004 | 0.052 | -2.021 |
| Kdelc1        | 0.592  | 7.879  | 3.304  | 0.004 | 0.052 | -2.022 |
| Wdr59         | -0.424 | 6.187  | -3.304 | 0.004 | 0.052 | -2.022 |
| Cryab         | -1.431 | 4.407  | -3.302 | 0.004 | 0.053 | -2.026 |
| Ppil6         | -0.451 | 2.885  | -3.302 | 0.004 | 0.053 | -2.026 |
| Svepl         | -0.652 | 5.408  | -3.302 | 0.004 | 0.053 | -2.027 |
| Fndc9         | -0.433 | 2.921  | -3.301 | 0.004 | 0.053 | -2.028 |
| Cox6a1        | -0.487 | 11.984 | -3.301 | 0.004 | 0.053 | -2.028 |
| Plekha6       | 0.649  | 8.613  | 3.301  | 0.004 | 0.053 | -2.029 |
| Fam89b        | -0.389 | 7.315  | -3.300 | 0.004 | 0.053 | -2.029 |
| BC051628      | -0.418 | 3.590  | -3.300 | 0.004 | 0.053 | -2.030 |
| 1810053B23Rik | -0.372 | 3.382  | -3.300 | 0.004 | 0.053 | -2.031 |
| Nhs12         | -0.438 | 2.217  | -3.299 | 0.004 | 0.053 | -2.031 |
| Pi4k2a        | -1.599 | 6.664  | -3.299 | 0.004 | 0.053 | -2.032 |
| Psm3          | 0.619  | 8.992  | 3.298  | 0.004 | 0.053 | -2.034 |
| Nup210        | 0.848  | 7.596  | 3.298  | 0.004 | 0.053 | -2.035 |
| Adam8         | 1.395  | 5.085  | 3.297  | 0.004 | 0.053 | -2.037 |
| Prss40        | -0.362 | 4.821  | -3.296 | 0.004 | 0.053 | -2.037 |
| Trim33        | -0.404 | 8.034  | -3.296 | 0.004 | 0.053 | -2.038 |
| Irs4          | -0.466 | 4.127  | -3.295 | 0.004 | 0.053 | -2.040 |
| Spn           | 0.834  | 6.754  | 3.294  | 0.004 | 0.053 | -2.042 |
| Pde6g         | -0.611 | 4.382  | -3.294 | 0.004 | 0.053 | -2.042 |
| Efh2          | 0.573  | 11.008 | 3.293  | 0.004 | 0.053 | -2.044 |
| Slc35f2       | 1.188  | 4.910  | 3.293  | 0.004 | 0.053 | -2.045 |
| Yeats4        | 0.362  | 8.881  | 3.291  | 0.004 | 0.053 | -2.048 |
| Plekhf1       | -0.813 | 6.066  | -3.290 | 0.004 | 0.053 | -2.051 |
| Snord104      | 0.926  | 7.835  | 3.290  | 0.004 | 0.053 | -2.051 |
| Polr2h        | 0.642  | 7.986  | 3.289  | 0.004 | 0.053 | -2.052 |
| Mtmr11        | -0.691 | 2.870  | -3.289 | 0.004 | 0.053 | -2.052 |
| Mknk1         | -0.548 | 6.643  | -3.289 | 0.004 | 0.053 | -2.052 |
| Necab2        | -0.499 | 5.750  | -3.289 | 0.004 | 0.053 | -2.052 |
| Hdac10        | -0.389 | 2.387  | -3.289 | 0.004 | 0.053 | -2.053 |
| Slpi          | 1.191  | 7.247  | 3.288  | 0.004 | 0.053 | -2.054 |
| Odf3          | -0.437 | 4.024  | -3.288 | 0.004 | 0.053 | -2.055 |

|               |        |        |        |       |       |        |
|---------------|--------|--------|--------|-------|-------|--------|
| Phf14         | -0.390 | 2.191  | -3.288 | 0.004 | 0.053 | -2.055 |
| D530031A16Rik | -0.641 | 4.435  | -3.287 | 0.004 | 0.053 | -2.056 |
| Zfp61         | -0.524 | 4.448  | -3.286 | 0.004 | 0.053 | -2.059 |
| Misl8a        | 0.784  | 6.504  | 3.285  | 0.004 | 0.053 | -2.060 |
| Cabp5         | -0.587 | 3.742  | -3.284 | 0.004 | 0.053 | -2.062 |
| 1700013F07Rik | -0.520 | 3.953  | -3.284 | 0.004 | 0.053 | -2.062 |
| Cdk5          | -0.469 | 5.384  | -3.284 | 0.004 | 0.054 | -2.064 |
| B3gnt11       | -0.439 | 5.683  | -3.283 | 0.004 | 0.054 | -2.064 |
| Pdcd11        | 0.610  | 7.022  | 3.282  | 0.004 | 0.054 | -2.067 |
| Zc4h2         | -0.540 | 3.852  | -3.282 | 0.004 | 0.054 | -2.067 |
| Vgf           | -0.622 | 5.602  | -3.281 | 0.004 | 0.054 | -2.068 |
| Id2           | -0.670 | 9.204  | -3.280 | 0.004 | 0.054 | -2.071 |
| Eif1a         | 0.731  | 8.652  | 3.279  | 0.004 | 0.054 | -2.072 |
| Rilp          | -0.361 | 6.527  | -3.279 | 0.004 | 0.054 | -2.073 |
| Hnrnp1        | 1.079  | 9.694  | 3.279  | 0.004 | 0.054 | -2.073 |
| Trim71        | -0.474 | 2.933  | -3.279 | 0.004 | 0.054 | -2.073 |
| Zfand6        | -0.468 | 8.258  | -3.277 | 0.004 | 0.054 | -2.076 |
| BC027231      | 0.652  | 5.788  | 3.276  | 0.004 | 0.054 | -2.080 |
| Nlrc5         | 3.369  | 6.589  | 3.275  | 0.004 | 0.054 | -2.081 |
| Gm27032       | -0.603 | 3.960  | -3.275 | 0.004 | 0.054 | -2.081 |
| Rcc1          | 0.582  | 7.057  | 3.273  | 0.004 | 0.054 | -2.084 |
| 5033415L01Rik | -0.724 | 4.777  | -3.273 | 0.004 | 0.054 | -2.084 |
| Hnf1b         | -0.630 | 5.569  | -3.272 | 0.004 | 0.054 | -2.086 |
| Fam50b        | -0.386 | 4.531  | -3.272 | 0.004 | 0.054 | -2.087 |
| Ccna2         | 0.763  | 8.774  | 3.272  | 0.004 | 0.054 | -2.087 |
| Mndal         | 1.688  | 5.047  | 3.270  | 0.004 | 0.055 | -2.092 |
| Tmem60        | -0.604 | 7.857  | -3.269 | 0.004 | 0.055 | -2.094 |
| Sox30         | -0.335 | 2.366  | -3.268 | 0.004 | 0.055 | -2.094 |
| Pex11b        | -0.546 | 6.146  | -3.266 | 0.004 | 0.055 | -2.100 |
| Peli2         | -1.213 | 4.533  | -3.265 | 0.004 | 0.055 | -2.100 |
| Camkv         | -0.530 | 4.354  | -3.265 | 0.004 | 0.055 | -2.101 |
| Atrn          | -0.624 | 4.660  | -3.265 | 0.004 | 0.055 | -2.101 |
| E130116L18Rik | -0.644 | 4.811  | -3.265 | 0.004 | 0.055 | -2.102 |
| Pard3bos1     | -0.500 | 2.772  | -3.263 | 0.005 | 0.055 | -2.105 |
| Gm438         | -0.537 | 2.870  | -3.263 | 0.005 | 0.055 | -2.106 |
| Rtcb          | 0.546  | 10.032 | 3.263  | 0.005 | 0.055 | -2.106 |
| Mina          | 0.447  | 5.575  | 3.262  | 0.005 | 0.055 | -2.107 |
| Tap2          | 2.010  | 7.821  | 3.262  | 0.005 | 0.055 | -2.107 |
| Wsb1          | 1.065  | 6.043  | 3.262  | 0.005 | 0.055 | -2.108 |
| Zfp219        | 0.405  | 6.432  | 3.259  | 0.005 | 0.055 | -2.114 |
| Grem2         | -1.362 | 6.173  | -3.259 | 0.005 | 0.055 | -2.114 |
| Med20         | -0.399 | 6.116  | -3.258 | 0.005 | 0.055 | -2.116 |
| Wnt8b         | -0.395 | 2.997  | -3.258 | 0.005 | 0.055 | -2.116 |
| Sult2b1       | -0.684 | 6.684  | -3.257 | 0.005 | 0.055 | -2.117 |
| Ppp2r2c       | -0.319 | 2.390  | -3.257 | 0.005 | 0.056 | -2.118 |
| Gripap1       | 0.486  | 8.024  | 3.256  | 0.005 | 0.056 | -2.119 |
| C78148        | -0.641 | 4.630  | -3.255 | 0.005 | 0.056 | -2.121 |
| 2810459M11Rik | 0.577  | 7.375  | 3.254  | 0.005 | 0.056 | -2.123 |
| Dact1         | -0.785 | 5.225  | -3.253 | 0.005 | 0.056 | -2.126 |
| Trmt61b       | 0.530  | 6.077  | 3.253  | 0.005 | 0.056 | -2.126 |

|               |        |        |        |       |       |        |
|---------------|--------|--------|--------|-------|-------|--------|
| Ldhb          | -1.768 | 9.811  | -3.252 | 0.005 | 0.056 | -2.127 |
| Tep1          | 0.628  | 8.198  | 3.252  | 0.005 | 0.056 | -2.127 |
| Zdhhc22       | -0.506 | 5.146  | -3.252 | 0.005 | 0.056 | -2.128 |
| Zfp286it      | -0.584 | 3.687  | -3.251 | 0.005 | 0.056 | -2.129 |
| Tbccd1        | -0.464 | 4.298  | -3.251 | 0.005 | 0.056 | -2.129 |
| Cabp7         | -0.439 | 2.718  | -3.251 | 0.005 | 0.056 | -2.130 |
| Tmem254a      | -0.600 | 5.566  | -3.250 | 0.005 | 0.056 | -2.131 |
| AU015253      | -0.543 | 3.658  | -3.250 | 0.005 | 0.056 | -2.131 |
| 2310016G11Rik | -0.501 | 3.171  | -3.250 | 0.005 | 0.056 | -2.132 |
| Rpia          | 0.719  | 9.055  | 3.249  | 0.005 | 0.056 | -2.133 |
| Dock10        | 1.500  | 4.786  | 3.249  | 0.005 | 0.056 | -2.135 |
| Fez2          | -0.603 | 6.225  | -3.246 | 0.005 | 0.056 | -2.141 |
| Rimkla        | -0.562 | 3.011  | -3.246 | 0.005 | 0.056 | -2.141 |
| Zfat          | -0.654 | 5.308  | -3.244 | 0.005 | 0.056 | -2.143 |
| Sfxn2         | -0.751 | 6.680  | -3.244 | 0.005 | 0.056 | -2.143 |
| Elk4          | -0.527 | 6.171  | -3.244 | 0.005 | 0.056 | -2.144 |
| Vax1          | -0.487 | 4.327  | -3.244 | 0.005 | 0.056 | -2.144 |
| Ncmap         | 0.663  | 8.807  | 3.244  | 0.005 | 0.056 | -2.144 |
| AU045094      | -0.382 | 2.215  | -3.242 | 0.005 | 0.057 | -2.147 |
| Prkrip1       | 0.441  | 7.315  | 3.242  | 0.005 | 0.057 | -2.147 |
| 4930551I15Rik | -0.455 | 3.256  | -3.242 | 0.005 | 0.057 | -2.148 |
| Axin2         | -0.460 | 3.154  | -3.242 | 0.005 | 0.057 | -2.149 |
| 2700089I24Rik | -0.569 | 5.418  | -3.241 | 0.005 | 0.057 | -2.150 |
| Pus71         | 0.710  | 5.350  | 3.241  | 0.005 | 0.057 | -2.150 |
| Tfdp2         | -1.175 | 8.289  | -3.241 | 0.005 | 0.057 | -2.151 |
| Mpz12         | 0.465  | 8.325  | 3.239  | 0.005 | 0.057 | -2.154 |
| Sgms1         | -0.562 | 6.366  | -3.239 | 0.005 | 0.057 | -2.154 |
| Rep15         | -0.966 | 10.434 | -3.239 | 0.005 | 0.057 | -2.155 |
| Neol          | -0.662 | 7.640  | -3.238 | 0.005 | 0.057 | -2.155 |
| 2310034005Rik | -0.454 | 3.109  | -3.238 | 0.005 | 0.057 | -2.155 |
| Kbtbd13       | -0.517 | 4.474  | -3.238 | 0.005 | 0.057 | -2.156 |
| Prpf19        | 0.395  | 9.360  | 3.237  | 0.005 | 0.057 | -2.157 |
| Krtap4-16     | -0.488 | 4.337  | -3.237 | 0.005 | 0.057 | -2.157 |
| Msh3          | -0.361 | 3.150  | -3.236 | 0.005 | 0.057 | -2.159 |
| B930059L03Rik | -0.415 | 5.193  | -3.236 | 0.005 | 0.057 | -2.160 |
| Itga6         | 0.410  | 11.071 | 3.235  | 0.005 | 0.057 | -2.161 |
| Slc16a10      | -0.618 | 5.855  | -3.235 | 0.005 | 0.057 | -2.162 |
| Sec61a1       | 0.617  | 11.069 | 3.234  | 0.005 | 0.057 | -2.164 |
| Scnn1b        | 0.709  | 5.276  | 3.233  | 0.005 | 0.057 | -2.167 |
| Zfp759        | -0.472 | 4.596  | -3.232 | 0.005 | 0.057 | -2.168 |
| Tceanc        | 0.392  | 5.666  | 3.231  | 0.005 | 0.057 | -2.170 |
| Vwa5b2        | -0.482 | 3.259  | -3.231 | 0.005 | 0.057 | -2.170 |
| C820005J03Rik | -0.411 | 2.906  | -3.231 | 0.005 | 0.057 | -2.170 |
| Tnfrsf19      | -0.450 | 3.431  | -3.231 | 0.005 | 0.057 | -2.171 |
| Slc2a12       | -0.790 | 4.138  | -3.229 | 0.005 | 0.057 | -2.173 |
| Phrf1         | 0.386  | 7.962  | 3.229  | 0.005 | 0.057 | -2.174 |
| Islr2         | -0.579 | 3.560  | -3.229 | 0.005 | 0.057 | -2.175 |
| Arsa          | -0.383 | 7.001  | -3.228 | 0.005 | 0.057 | -2.176 |
| Hist1h1t      | -0.564 | 4.182  | -3.228 | 0.005 | 0.057 | -2.176 |
| Trpc7         | -0.596 | 5.022  | -3.227 | 0.005 | 0.057 | -2.178 |

|               |        |        |        |       |       |        |
|---------------|--------|--------|--------|-------|-------|--------|
| AI662175      | -0.478 | 2.846  | -3.227 | 0.005 | 0.057 | -2.178 |
| Smarcel       | 0.386  | 8.209  | 3.226  | 0.005 | 0.057 | -2.179 |
| Fut9          | -1.368 | 7.309  | -3.226 | 0.005 | 0.057 | -2.179 |
| AK040357      | -0.515 | 3.588  | -3.224 | 0.005 | 0.058 | -2.184 |
| Klk1b24       | -0.546 | 3.667  | -3.224 | 0.005 | 0.058 | -2.184 |
| Rgs10         | 0.847  | 7.046  | 3.224  | 0.005 | 0.058 | -2.184 |
| Smg7          | 0.430  | 7.284  | 3.222  | 0.005 | 0.058 | -2.189 |
| Krt7          | 1.792  | 10.168 | 3.222  | 0.005 | 0.058 | -2.189 |
| Zfp286        | -0.444 | 2.591  | -3.221 | 0.005 | 0.058 | -2.191 |
| Pou2af1       | 1.863  | 4.534  | 3.220  | 0.005 | 0.058 | -2.192 |
| Stxbp51       | -0.376 | 3.196  | -3.219 | 0.005 | 0.058 | -2.194 |
| Gabra6        | -0.453 | 3.116  | -3.218 | 0.005 | 0.058 | -2.196 |
| Trappc12      | -0.376 | 7.060  | -3.218 | 0.005 | 0.058 | -2.197 |
| Gpam          | -1.164 | 8.703  | -3.217 | 0.005 | 0.058 | -2.198 |
| St6gal2       | -1.473 | 5.148  | -3.217 | 0.005 | 0.058 | -2.199 |
| Gjb4          | -0.453 | 3.229  | -3.217 | 0.005 | 0.058 | -2.199 |
| Adck3         | -1.435 | 6.751  | -3.216 | 0.005 | 0.058 | -2.199 |
| Mtmr6         | -0.588 | 7.651  | -3.216 | 0.005 | 0.058 | -2.200 |
| Mtag2         | -0.290 | 3.599  | -3.216 | 0.005 | 0.058 | -2.201 |
| Nrros         | 0.955  | 4.958  | 3.215  | 0.005 | 0.058 | -2.202 |
| Kdmlb         | -0.518 | 6.987  | -3.215 | 0.005 | 0.058 | -2.202 |
| Gm16794       | -0.515 | 2.508  | -3.215 | 0.005 | 0.058 | -2.203 |
| Nkx6-1        | -0.525 | 3.882  | -3.214 | 0.005 | 0.058 | -2.204 |
| Cib4          | -0.389 | 4.800  | -3.214 | 0.005 | 0.058 | -2.204 |
| AI844869      | -0.367 | 4.656  | -3.214 | 0.005 | 0.058 | -2.205 |
| Vcan          | -0.552 | 3.312  | -3.213 | 0.005 | 0.058 | -2.206 |
| BC065403      | -0.401 | 2.463  | -3.213 | 0.005 | 0.058 | -2.206 |
| Prop1         | -0.386 | 3.574  | -3.213 | 0.005 | 0.058 | -2.206 |
| Hltf          | -0.865 | 3.973  | -3.213 | 0.005 | 0.058 | -2.207 |
| 9130414P19Rik | -0.379 | 2.458  | -3.213 | 0.005 | 0.058 | -2.207 |
| Efhd1         | -0.539 | 3.385  | -3.212 | 0.005 | 0.058 | -2.209 |
| Ndrg2         | -1.030 | 7.266  | -3.211 | 0.005 | 0.058 | -2.210 |
| Zfp329        | 0.903  | 4.520  | 3.211  | 0.005 | 0.058 | -2.210 |
| Ft11          | -0.433 | 7.643  | -3.210 | 0.005 | 0.058 | -2.212 |
| Bmp7          | -0.673 | 5.121  | -3.210 | 0.005 | 0.058 | -2.212 |
| Colq          | -0.329 | 3.863  | -3.210 | 0.005 | 0.058 | -2.213 |
| Slc35d3       | -0.437 | 2.562  | -3.210 | 0.005 | 0.058 | -2.213 |
| Cib2          | -0.730 | 3.801  | -3.210 | 0.005 | 0.058 | -2.213 |
| Zfp326        | 0.615  | 5.889  | 3.209  | 0.005 | 0.058 | -2.214 |
| Usp42         | 0.396  | 7.618  | 3.208  | 0.005 | 0.059 | -2.216 |
| 1110008P14Rik | -0.546 | 8.660  | -3.208 | 0.005 | 0.059 | -2.217 |
| Lcor          | 0.392  | 9.499  | 3.208  | 0.005 | 0.059 | -2.217 |
| Mrps2         | -0.521 | 6.246  | -3.207 | 0.005 | 0.059 | -2.218 |
| Psca          | -0.762 | 13.400 | -3.207 | 0.005 | 0.059 | -2.218 |
| Nat10         | 0.481  | 6.633  | 3.206  | 0.005 | 0.059 | -2.220 |
| Sltm          | 0.519  | 8.499  | 3.206  | 0.005 | 0.059 | -2.221 |
| Cel           | -1.471 | 6.124  | -3.205 | 0.005 | 0.059 | -2.222 |
| 4921504P20Rik | -0.487 | 4.590  | -3.204 | 0.005 | 0.059 | -2.224 |
| Pcdhb5        | -0.489 | 3.632  | -3.203 | 0.005 | 0.059 | -2.226 |
| Kis2          | -0.474 | 4.153  | -3.203 | 0.005 | 0.059 | -2.226 |

|               |        |        |        |       |       |        |
|---------------|--------|--------|--------|-------|-------|--------|
| Zbtb2         | 0.381  | 7.291  | 3.203  | 0.005 | 0.059 | -2.227 |
| 9030613N10Rik | -0.497 | 2.923  | -3.203 | 0.005 | 0.059 | -2.227 |
| Eif4g1        | 0.436  | 11.490 | 3.203  | 0.005 | 0.059 | -2.228 |
| Aldh4a1       | -0.590 | 6.455  | -3.201 | 0.005 | 0.059 | -2.231 |
| Gm8579        | -0.342 | 2.856  | -3.201 | 0.005 | 0.059 | -2.231 |
| 9430076C15Rik | -0.484 | 3.322  | -3.201 | 0.005 | 0.059 | -2.231 |
| Unc13b        | -0.532 | 8.142  | -3.200 | 0.005 | 0.059 | -2.232 |
| 6430573F11Rik | -0.370 | 2.772  | -3.200 | 0.005 | 0.059 | -2.233 |
| Tmtc1         | -0.697 | 4.810  | -3.199 | 0.005 | 0.059 | -2.235 |
| Uqcrq         | -0.589 | 4.510  | -3.199 | 0.005 | 0.059 | -2.235 |
| Magi3         | -0.679 | 4.974  | -3.199 | 0.005 | 0.059 | -2.235 |
| Sorbs3        | -0.731 | 7.340  | -3.199 | 0.005 | 0.059 | -2.235 |
| Pde3a         | -0.634 | 3.979  | -3.198 | 0.005 | 0.059 | -2.236 |
| Nmb           | -0.533 | 4.739  | -3.197 | 0.005 | 0.059 | -2.238 |
| Slc22a29      | -0.566 | 3.477  | -3.197 | 0.005 | 0.059 | -2.239 |
| Ntn4          | -1.076 | 7.712  | -3.196 | 0.005 | 0.059 | -2.241 |
| Zfp263        | 1.095  | 6.786  | 3.195  | 0.005 | 0.059 | -2.242 |
| Unc45b        | -0.831 | 3.537  | -3.195 | 0.005 | 0.059 | -2.243 |
| Gli3          | -0.571 | 3.748  | -3.195 | 0.005 | 0.059 | -2.243 |
| 4930500M09Rik | -0.431 | 4.078  | -3.194 | 0.005 | 0.060 | -2.245 |
| Stx1a         | -0.441 | 5.715  | -3.194 | 0.005 | 0.060 | -2.246 |
| Etv3          | 0.749  | 8.668  | 3.193  | 0.005 | 0.060 | -2.247 |
| Setd4         | -0.705 | 6.876  | -3.192 | 0.005 | 0.060 | -2.248 |
| Fycol         | -0.482 | 8.044  | -3.192 | 0.005 | 0.060 | -2.248 |
| Gm11267       | -0.452 | 4.444  | -3.191 | 0.005 | 0.060 | -2.250 |
| AI503301      | 1.174  | 4.581  | 3.190  | 0.005 | 0.060 | -2.253 |
| Zfp14         | -0.575 | 3.492  | -3.190 | 0.005 | 0.060 | -2.254 |
| Cacnalg       | -0.392 | 4.167  | -3.189 | 0.005 | 0.060 | -2.255 |
| Limal         | 0.858  | 9.620  | 3.188  | 0.005 | 0.060 | -2.258 |
| LOC102636681  | -0.317 | 2.147  | -3.187 | 0.005 | 0.060 | -2.259 |
| Lyrn5         | -0.949 | 8.093  | -3.187 | 0.005 | 0.060 | -2.260 |
| A130040M12Rik | 1.508  | 8.068  | 3.186  | 0.005 | 0.060 | -2.260 |
| Pnma1         | -0.495 | 3.192  | -3.186 | 0.005 | 0.060 | -2.260 |
| Cutal         | -0.671 | 4.848  | -3.184 | 0.005 | 0.060 | -2.265 |
| Thg11         | -0.591 | 4.834  | -3.183 | 0.005 | 0.060 | -2.267 |
| Pdcd6ip       | 0.404  | 7.091  | 3.183  | 0.005 | 0.060 | -2.268 |
| Kat6a         | 0.304  | 9.012  | 3.182  | 0.005 | 0.060 | -2.268 |
| Satb1         | 1.299  | 4.116  | 3.182  | 0.005 | 0.060 | -2.268 |
| Cdip1         | -0.410 | 6.369  | -3.182 | 0.005 | 0.060 | -2.269 |
| Hivep2        | 0.727  | 6.380  | 3.181  | 0.005 | 0.060 | -2.270 |
| Srsf3         | 0.516  | 10.400 | 3.181  | 0.005 | 0.060 | -2.270 |
| Kcnq1         | -0.789 | 9.360  | -3.181 | 0.005 | 0.060 | -2.271 |
| Nuak2         | 0.495  | 5.660  | 3.181  | 0.005 | 0.060 | -2.271 |
| Capn2         | 0.672  | 9.139  | 3.181  | 0.005 | 0.060 | -2.271 |
| Brd1          | 0.355  | 7.902  | 3.181  | 0.005 | 0.060 | -2.272 |
| AU015558      | -0.495 | 3.029  | -3.181 | 0.005 | 0.060 | -2.272 |
| Adamts16      | -0.511 | 5.157  | -3.180 | 0.005 | 0.060 | -2.273 |
| Gsta2         | -1.022 | 9.451  | -3.179 | 0.005 | 0.061 | -2.275 |
| Isca2         | -0.480 | 7.909  | -3.179 | 0.005 | 0.061 | -2.275 |
| Thsd7b        | -0.492 | 5.527  | -3.177 | 0.005 | 0.061 | -2.279 |



|               |        |        |        |       |       |        |
|---------------|--------|--------|--------|-------|-------|--------|
| Rbbp4         | 0.369  | 10.408 | 3.177  | 0.005 | 0.061 | -2.280 |
| Ankrd54       | 0.332  | 6.937  | 3.176  | 0.005 | 0.061 | -2.281 |
| Smad9         | -0.605 | 3.364  | -3.176 | 0.005 | 0.061 | -2.282 |
| Svop          | -0.318 | 4.333  | -3.175 | 0.005 | 0.061 | -2.284 |
| abParts       | 1.823  | 5.435  | 3.175  | 0.005 | 0.061 | -2.284 |
| Six5          | -0.558 | 5.461  | -3.174 | 0.005 | 0.061 | -2.285 |
| Yipf7         | -0.433 | 5.102  | -3.173 | 0.005 | 0.061 | -2.287 |
| LOC102635387  | -0.506 | 4.483  | -3.173 | 0.005 | 0.061 | -2.287 |
| Gm13872       | -0.480 | 5.565  | -3.172 | 0.005 | 0.061 | -2.289 |
| Nucb2         | -0.800 | 7.722  | -3.172 | 0.005 | 0.061 | -2.289 |
| Gm9777        | -0.454 | 4.999  | -3.172 | 0.005 | 0.061 | -2.290 |
| Zfp867        | -0.447 | 3.013  | -3.172 | 0.005 | 0.061 | -2.290 |
| St8sial       | -0.485 | 4.079  | -3.171 | 0.005 | 0.061 | -2.292 |
| 9430069I07Rik | -0.544 | 3.781  | -3.170 | 0.006 | 0.061 | -2.292 |
| Abcc4         | 0.786  | 8.142  | 3.170  | 0.006 | 0.061 | -2.293 |
| Lats2         | -0.549 | 4.825  | -3.170 | 0.006 | 0.061 | -2.293 |
| Rbm34         | 0.540  | 6.503  | 3.170  | 0.006 | 0.061 | -2.293 |
| Cmtm5         | -0.517 | 5.272  | -3.169 | 0.006 | 0.061 | -2.295 |
| AK076947      | -0.561 | 5.239  | -3.168 | 0.006 | 0.061 | -2.298 |
| Prkcz         | -0.914 | 7.327  | -3.168 | 0.006 | 0.061 | -2.298 |
| Slc25a3       | -0.356 | 12.458 | -3.168 | 0.006 | 0.061 | -2.298 |
| 4930430A15Rik | -0.406 | 2.802  | -3.167 | 0.006 | 0.061 | -2.299 |
| Vgl13         | -0.422 | 2.930  | -3.167 | 0.006 | 0.061 | -2.299 |
| Krt79         | 0.785  | 7.427  | 3.167  | 0.006 | 0.061 | -2.300 |
| 2810430I11Rik | -0.528 | 3.029  | -3.166 | 0.006 | 0.061 | -2.301 |
| Slc41a3       | -0.326 | 6.739  | -3.166 | 0.006 | 0.061 | -2.302 |
| Efcab3        | -0.415 | 3.703  | -3.165 | 0.006 | 0.062 | -2.304 |
| Phf5a         | 0.500  | 9.381  | 3.165  | 0.006 | 0.062 | -2.304 |
| Tmcc3         | 0.939  | 7.947  | 3.164  | 0.006 | 0.062 | -2.305 |
| C80283        | -0.541 | 4.126  | -3.164 | 0.006 | 0.062 | -2.305 |
| C1s1          | 2.072  | 6.281  | 3.164  | 0.006 | 0.062 | -2.306 |
| Mst1r         | 0.473  | 7.915  | 3.163  | 0.006 | 0.062 | -2.307 |
| 4930459I23Rik | -0.414 | 2.720  | -3.163 | 0.006 | 0.062 | -2.307 |
| Rbpms         | -0.582 | 4.532  | -3.162 | 0.006 | 0.062 | -2.309 |
| Pcp411        | -1.504 | 5.308  | -3.162 | 0.006 | 0.062 | -2.310 |
| Cysrt1        | -0.889 | 9.234  | -3.162 | 0.006 | 0.062 | -2.310 |
| Tdpoz1        | -0.457 | 2.985  | -3.162 | 0.006 | 0.062 | -2.310 |
| Afmid         | -0.701 | 5.587  | -3.161 | 0.006 | 0.062 | -2.311 |
| 2510039018Rik | 0.515  | 9.040  | 3.161  | 0.006 | 0.062 | -2.311 |
| Cc16          | 1.164  | 4.945  | 3.161  | 0.006 | 0.062 | -2.311 |
| 6030400A10Rik | -0.407 | 3.325  | -3.161 | 0.006 | 0.062 | -2.312 |
| A430035B10Rik | -0.513 | 3.982  | -3.160 | 0.006 | 0.062 | -2.313 |
| Rnf5          | -0.392 | 8.803  | -3.160 | 0.006 | 0.062 | -2.314 |
| Gpt           | -1.087 | 8.677  | -3.159 | 0.006 | 0.062 | -2.314 |
| Hcrt          | -0.398 | 5.488  | -3.159 | 0.006 | 0.062 | -2.315 |
| Cbx3          | 0.541  | 10.103 | 3.159  | 0.006 | 0.062 | -2.315 |
| 1700034E13Rik | -0.344 | 3.454  | -3.159 | 0.006 | 0.062 | -2.316 |
| Pla2g2a       | -0.522 | 4.207  | -3.158 | 0.006 | 0.062 | -2.318 |
| Smpd2         | -0.414 | 8.138  | -3.157 | 0.006 | 0.062 | -2.320 |
| Obp2a         | -0.563 | 4.013  | -3.157 | 0.006 | 0.062 | -2.320 |

|               |        |        |        |       |       |        |
|---------------|--------|--------|--------|-------|-------|--------|
| 1700019G17Rik | -0.349 | 5.070  | -3.156 | 0.006 | 0.062 | -2.321 |
| Ctag2         | -0.453 | 3.920  | -3.156 | 0.006 | 0.062 | -2.321 |
| Hs3st1        | 1.707  | 8.401  | 3.156  | 0.006 | 0.062 | -2.321 |
| 4930438A08Rik | -0.558 | 4.313  | -3.156 | 0.006 | 0.062 | -2.322 |
| Exoc3l        | -0.514 | 3.388  | -3.155 | 0.006 | 0.062 | -2.323 |
| Gm6297        | -0.610 | 2.866  | -3.155 | 0.006 | 0.062 | -2.323 |
| Glul          | -0.729 | 9.817  | -3.154 | 0.006 | 0.062 | -2.325 |
| Fuca2         | -0.548 | 8.587  | -3.154 | 0.006 | 0.062 | -2.325 |
| Cp            | 2.035  | 6.751  | 3.151  | 0.006 | 0.062 | -2.331 |
| Nol3          | -0.457 | 2.908  | -3.151 | 0.006 | 0.062 | -2.332 |
| Abhd14b       | -0.460 | 9.390  | -3.150 | 0.006 | 0.062 | -2.333 |
| Lingol        | -0.503 | 3.427  | -3.150 | 0.006 | 0.062 | -2.334 |
| Vars          | 0.645  | 8.810  | 3.150  | 0.006 | 0.062 | -2.334 |
| Psmc4         | 0.796  | 9.742  | 3.149  | 0.006 | 0.062 | -2.335 |
| 2610028H24Rik | -0.530 | 3.931  | -3.149 | 0.006 | 0.062 | -2.335 |
| Pycr1         | -1.501 | 6.949  | -3.149 | 0.006 | 0.062 | -2.336 |
| Camk2n2       | -0.631 | 5.474  | -3.148 | 0.006 | 0.062 | -2.337 |
| Cox4i1        | -0.358 | 12.734 | -3.148 | 0.006 | 0.063 | -2.338 |
| Pfkfb4        | 0.766  | 6.668  | 3.147  | 0.006 | 0.063 | -2.339 |
| 8030476L19Rik | -0.444 | 3.125  | -3.147 | 0.006 | 0.063 | -2.340 |
| Gm19924       | -0.498 | 3.611  | -3.146 | 0.006 | 0.063 | -2.341 |
| Tmx4          | -0.718 | 4.558  | -3.146 | 0.006 | 0.063 | -2.341 |
| Cenpf         | 0.820  | 6.984  | 3.146  | 0.006 | 0.063 | -2.342 |
| 4933427D14Rik | 0.575  | 5.500  | 3.146  | 0.006 | 0.063 | -2.342 |
| Rbm20         | -0.837 | 5.568  | -3.146 | 0.006 | 0.063 | -2.342 |
| 4930402D18Rik | -0.408 | 2.792  | -3.146 | 0.006 | 0.063 | -2.342 |
| Rbbp6         | -0.712 | 4.497  | -3.145 | 0.006 | 0.063 | -2.344 |
| Kit           | -0.796 | 5.283  | -3.144 | 0.006 | 0.063 | -2.345 |
| Cdx2          | -0.405 | 4.115  | -3.144 | 0.006 | 0.063 | -2.345 |
| Trpc2         | -0.419 | 6.657  | -3.144 | 0.006 | 0.063 | -2.346 |
| 4632419I22Rik | -0.500 | 3.150  | -3.143 | 0.006 | 0.063 | -2.348 |
| Mei1          | -0.363 | 3.092  | -3.143 | 0.006 | 0.063 | -2.348 |
| Gm7846        | 0.938  | 7.997  | 3.143  | 0.006 | 0.063 | -2.348 |
| Prcp          | -0.352 | 2.597  | -3.143 | 0.006 | 0.063 | -2.348 |
| Rfp14         | -0.323 | 2.558  | -3.143 | 0.006 | 0.063 | -2.348 |
| Fgf22         | -0.408 | 4.302  | -3.143 | 0.006 | 0.063 | -2.348 |
| 5330403D14Rik | -0.410 | 2.814  | -3.142 | 0.006 | 0.063 | -2.350 |
| Mgat4b        | 0.530  | 9.674  | 3.141  | 0.006 | 0.063 | -2.351 |
| Rtn4r11       | -0.541 | 5.411  | -3.141 | 0.006 | 0.063 | -2.351 |
| Pik3c2g       | -0.770 | 5.352  | -3.141 | 0.006 | 0.063 | -2.352 |
| Fam160a1      | -0.690 | 6.613  | -3.141 | 0.006 | 0.063 | -2.352 |
| Zfp189        | -0.499 | 3.339  | -3.139 | 0.006 | 0.063 | -2.355 |
| Mrap2         | -0.353 | 3.702  | -3.139 | 0.006 | 0.063 | -2.355 |
| Folr2         | -0.484 | 4.389  | -3.139 | 0.006 | 0.063 | -2.356 |
| Gm4285        | -0.466 | 4.812  | -3.139 | 0.006 | 0.063 | -2.356 |
| 4930406D18Rik | -0.432 | 3.918  | -3.139 | 0.006 | 0.063 | -2.357 |
| 4933436E23Rik | -0.629 | 4.940  | -3.138 | 0.006 | 0.063 | -2.358 |
| Akap6         | -0.534 | 4.612  | -3.138 | 0.006 | 0.063 | -2.358 |
| Atxn712       | -0.470 | 5.741  | -3.138 | 0.006 | 0.063 | -2.359 |
| 1810008I18Rik | -0.585 | 4.363  | -3.137 | 0.006 | 0.063 | -2.359 |

|               |        |        |        |       |       |        |
|---------------|--------|--------|--------|-------|-------|--------|
| Wdr95         | -0.525 | 3.275  | -3.136 | 0.006 | 0.063 | -2.362 |
| Ccdc711       | 0.846  | 8.748  | 3.136  | 0.006 | 0.063 | -2.363 |
| Ypel5         | -0.438 | 7.201  | -3.135 | 0.006 | 0.063 | -2.364 |
| Gcdh          | -0.935 | 6.089  | -3.135 | 0.006 | 0.063 | -2.364 |
| Hyal4         | -0.458 | 4.163  | -3.135 | 0.006 | 0.063 | -2.365 |
| LOC102635048  | 0.320  | 11.964 | 3.134  | 0.006 | 0.063 | -2.365 |
| Naaa          | -0.471 | 4.939  | -3.134 | 0.006 | 0.063 | -2.366 |
| Zfp566        | 0.338  | 4.241  | 3.133  | 0.006 | 0.063 | -2.368 |
| Rnf141        | -0.402 | 2.544  | -3.133 | 0.006 | 0.063 | -2.368 |
| Shroom4       | -0.455 | 4.261  | -3.133 | 0.006 | 0.063 | -2.368 |
| Btf3l4        | -0.691 | 5.259  | -3.133 | 0.006 | 0.063 | -2.368 |
| Plxna4        | -0.441 | 5.739  | -3.132 | 0.006 | 0.063 | -2.370 |
| Ttbk1         | -0.476 | 4.995  | -3.131 | 0.006 | 0.063 | -2.371 |
| Chst11        | 0.678  | 5.595  | 3.131  | 0.006 | 0.063 | -2.371 |
| Mllt3         | -0.509 | 8.065  | -3.131 | 0.006 | 0.063 | -2.371 |
| Hrh2          | -1.514 | 5.917  | -3.131 | 0.006 | 0.063 | -2.372 |
| Zfp319        | -0.456 | 3.802  | -3.130 | 0.006 | 0.063 | -2.374 |
| 5430402E10Rik | -0.327 | 2.759  | -3.130 | 0.006 | 0.063 | -2.374 |
| Gtf3c6        | -0.428 | 4.126  | -3.130 | 0.006 | 0.063 | -2.374 |
| Pcbp3         | -0.634 | 5.140  | -3.130 | 0.006 | 0.063 | -2.374 |
| Slc19a1       | 0.547  | 7.298  | 3.129  | 0.006 | 0.063 | -2.377 |
| Syncrip       | 0.705  | 6.882  | 3.128  | 0.006 | 0.063 | -2.377 |
| D130084N16Rik | 1.725  | 4.992  | 3.128  | 0.006 | 0.063 | -2.378 |
| Tex37         | -0.541 | 4.364  | -3.128 | 0.006 | 0.063 | -2.378 |
| Tbcd20        | 0.356  | 8.717  | 3.128  | 0.006 | 0.063 | -2.378 |
| Ptgs1         | 0.632  | 6.481  | 3.127  | 0.006 | 0.063 | -2.380 |
| Ptgfr         | -0.758 | 3.104  | -3.127 | 0.006 | 0.063 | -2.380 |
| Sstr5         | -0.598 | 4.440  | -3.127 | 0.006 | 0.063 | -2.380 |
| 4933412E24Rik | -0.354 | 3.948  | -3.127 | 0.006 | 0.063 | -2.380 |
| Gpsm3         | 0.909  | 5.673  | 3.127  | 0.006 | 0.063 | -2.381 |
| Acad11        | -0.757 | 8.300  | -3.126 | 0.006 | 0.063 | -2.381 |
| 4932702M13Rik | -0.368 | 2.422  | -3.126 | 0.006 | 0.063 | -2.382 |
| Ddb1          | 0.421  | 9.332  | 3.126  | 0.006 | 0.063 | -2.382 |
| Rprd1b        | 0.461  | 7.457  | 3.126  | 0.006 | 0.063 | -2.382 |
| Usp28         | -0.439 | 6.358  | -3.126 | 0.006 | 0.063 | -2.383 |
| Kcnj4         | -0.464 | 4.176  | -3.126 | 0.006 | 0.063 | -2.383 |
| Dfna5         | 0.376  | 3.290  | 3.126  | 0.006 | 0.063 | -2.383 |
| Limk1         | 0.388  | 3.461  | 3.125  | 0.006 | 0.063 | -2.384 |
| Extl3         | -0.529 | 3.579  | -3.124 | 0.006 | 0.064 | -2.387 |
| Kcng1         | -0.397 | 3.572  | -3.124 | 0.006 | 0.064 | -2.387 |
| Mrap          | -0.542 | 4.126  | -3.123 | 0.006 | 0.064 | -2.387 |
| C920021L13Rik | -0.591 | 5.438  | -3.122 | 0.006 | 0.064 | -2.389 |
| Exoc5         | 0.546  | 9.166  | 3.122  | 0.006 | 0.064 | -2.390 |
| Lpxn          | 1.180  | 5.136  | 3.121  | 0.006 | 0.064 | -2.392 |
| Galnt15       | -0.534 | 4.655  | -3.121 | 0.006 | 0.064 | -2.392 |
| Ank3          | -0.780 | 5.949  | -3.120 | 0.006 | 0.064 | -2.394 |
| C230091D08Rik | -0.862 | 5.864  | -3.120 | 0.006 | 0.064 | -2.395 |
| Chrn3         | -0.426 | 3.989  | -3.119 | 0.006 | 0.064 | -2.396 |
| Cd16311       | -0.520 | 3.619  | -3.118 | 0.006 | 0.064 | -2.397 |
| Vps4b         | 0.345  | 10.838 | 3.118  | 0.006 | 0.064 | -2.398 |

|               |        |        |        |       |       |        |
|---------------|--------|--------|--------|-------|-------|--------|
| Mrgpra3       | -0.589 | 4.220  | -3.118 | 0.006 | 0.064 | -2.398 |
| 4930558J22Rik | -0.484 | 2.545  | -3.118 | 0.006 | 0.064 | -2.398 |
| 4930566F21Rik | -0.391 | 2.635  | -3.118 | 0.006 | 0.064 | -2.399 |
| Cln6          | -0.493 | 7.251  | -3.117 | 0.006 | 0.064 | -2.400 |
| Slc39a8       | 1.413  | 5.281  | 3.117  | 0.006 | 0.064 | -2.401 |
| Tbce1         | -0.462 | 6.936  | -3.115 | 0.006 | 0.064 | -2.404 |
| Rnf182        | -0.358 | 2.472  | -3.115 | 0.006 | 0.064 | -2.404 |
| TCRB          | -0.370 | 4.680  | -3.115 | 0.006 | 0.064 | -2.405 |
| Krtap12-1     | -0.512 | 7.538  | -3.114 | 0.006 | 0.064 | -2.405 |
| C79452        | -0.345 | 3.244  | -3.114 | 0.006 | 0.064 | -2.406 |
| Nudcd2        | 0.505  | 9.479  | 3.114  | 0.006 | 0.064 | -2.407 |
| Pcmt1         | -0.598 | 7.329  | -3.113 | 0.006 | 0.064 | -2.408 |
| Lemd2         | 0.454  | 7.426  | 3.112  | 0.006 | 0.064 | -2.410 |
| Palm2         | -0.563 | 4.457  | -3.112 | 0.006 | 0.064 | -2.410 |
| Rnf208        | -1.004 | 7.099  | -3.112 | 0.006 | 0.064 | -2.410 |
| Crtcl         | -0.385 | 6.370  | -3.112 | 0.006 | 0.064 | -2.411 |
| Clca3         | 2.245  | 12.029 | 3.112  | 0.006 | 0.064 | -2.411 |
| 1110028F11Rik | -0.395 | 4.142  | -3.111 | 0.006 | 0.064 | -2.411 |
| Dot11         | 0.411  | 6.962  | 3.111  | 0.006 | 0.064 | -2.411 |
| Eps813        | 0.447  | 8.431  | 3.110  | 0.006 | 0.065 | -2.414 |
| Map4k3        | -0.451 | 8.660  | -3.110 | 0.006 | 0.065 | -2.415 |
| 5830407F19Rik | -0.660 | 3.890  | -3.109 | 0.006 | 0.065 | -2.415 |
| 1700034J05Rik | -0.333 | 2.272  | -3.109 | 0.006 | 0.065 | -2.416 |
| Kpnb1         | 0.551  | 8.178  | 3.108  | 0.006 | 0.065 | -2.417 |
| E430016F16Rik | -0.482 | 4.338  | -3.108 | 0.006 | 0.065 | -2.418 |
| Cnm3          | -0.490 | 5.338  | -3.108 | 0.006 | 0.065 | -2.419 |
| Dync1h1       | 0.393  | 10.380 | 3.107  | 0.006 | 0.065 | -2.419 |
| Phex          | -0.318 | 2.269  | -3.107 | 0.006 | 0.065 | -2.420 |
| C130026L21Rik | -0.514 | 4.941  | -3.107 | 0.006 | 0.065 | -2.421 |
| 4933433C11Rik | -0.430 | 4.362  | -3.106 | 0.006 | 0.065 | -2.422 |
| Did1          | -0.329 | 4.049  | -3.106 | 0.006 | 0.065 | -2.423 |
| Stox1         | -0.443 | 2.804  | -3.106 | 0.006 | 0.065 | -2.423 |
| Rhob          | 0.572  | 9.566  | 3.105  | 0.006 | 0.065 | -2.424 |
| Mccc2         | -0.774 | 4.897  | -3.105 | 0.006 | 0.065 | -2.425 |
| Gm14204       | -0.575 | 3.683  | -3.104 | 0.006 | 0.065 | -2.425 |
| Npm1          | 0.484  | 10.694 | 3.103  | 0.006 | 0.065 | -2.428 |
| Me3           | -1.399 | 5.637  | -3.102 | 0.006 | 0.065 | -2.429 |
| Prrg2         | -0.382 | 7.679  | -3.101 | 0.006 | 0.065 | -2.433 |
| Dbn1          | -0.483 | 4.330  | -3.101 | 0.006 | 0.065 | -2.433 |
| Dgkeos        | -0.411 | 3.228  | -3.100 | 0.006 | 0.065 | -2.433 |
| Clcn6         | -0.393 | 4.973  | -3.100 | 0.006 | 0.065 | -2.433 |
| Clic6         | -1.655 | 10.065 | -3.100 | 0.006 | 0.065 | -2.433 |
| Mnt           | 0.472  | 7.700  | 3.100  | 0.006 | 0.065 | -2.434 |
| Lpcat1        | -0.721 | 4.098  | -3.098 | 0.006 | 0.065 | -2.437 |
| Rex2          | -0.485 | 3.212  | -3.098 | 0.006 | 0.065 | -2.438 |
| Wdr35         | -0.566 | 3.466  | -3.098 | 0.006 | 0.065 | -2.438 |
| 1700007L15Rik | -0.537 | 4.040  | -3.098 | 0.006 | 0.065 | -2.438 |
| Rnase2a       | -0.539 | 3.708  | -3.098 | 0.006 | 0.065 | -2.438 |
| Scrn3         | -0.568 | 7.637  | -3.097 | 0.006 | 0.065 | -2.439 |
| Hey1          | -0.499 | 5.298  | -3.097 | 0.006 | 0.065 | -2.439 |

|               |        |        |        |       |       |        |
|---------------|--------|--------|--------|-------|-------|--------|
| Sarnp         | 0.339  | 8.735  | 3.097  | 0.006 | 0.065 | -2.440 |
| Cobl11        | -0.811 | 8.524  | -3.097 | 0.006 | 0.065 | -2.440 |
| Tmem171       | -1.154 | 7.867  | -3.097 | 0.006 | 0.065 | -2.440 |
| Cpped1        | 0.379  | 7.287  | 3.097  | 0.006 | 0.065 | -2.440 |
| 1700092E16Rik | -0.353 | 3.905  | -3.097 | 0.006 | 0.065 | -2.440 |
| 4930488N15Rik | -0.540 | 3.702  | -3.096 | 0.006 | 0.065 | -2.441 |
| AU017263      | -0.388 | 3.761  | -3.096 | 0.006 | 0.065 | -2.441 |
| 4930428021Rik | -0.450 | 3.801  | -3.096 | 0.006 | 0.065 | -2.442 |
| 9530003J23Rik | -0.357 | 2.686  | -3.096 | 0.006 | 0.065 | -2.442 |
| Tada2b        | -0.555 | 7.225  | -3.096 | 0.006 | 0.065 | -2.442 |
| Skap2         | 0.495  | 8.523  | 3.096  | 0.006 | 0.065 | -2.443 |
| Hoxd3         | -0.429 | 4.367  | -3.096 | 0.006 | 0.065 | -2.443 |
| Cckar         | -2.714 | 7.350  | -3.095 | 0.006 | 0.065 | -2.443 |
| Stk31         | -0.382 | 2.262  | -3.094 | 0.006 | 0.065 | -2.446 |
| Atp5b         | -0.414 | 12.783 | -3.092 | 0.007 | 0.066 | -2.449 |
| Grk6          | 0.491  | 8.936  | 3.092  | 0.007 | 0.066 | -2.450 |
| Izumo2        | -0.402 | 3.010  | -3.092 | 0.007 | 0.066 | -2.450 |
| Fhod1         | 0.710  | 5.801  | 3.092  | 0.007 | 0.066 | -2.451 |
| 4933427I22Rik | -0.369 | 4.072  | -3.092 | 0.007 | 0.066 | -2.451 |
| 2700038G22Rik | 1.096  | 7.315  | 3.092  | 0.007 | 0.066 | -2.451 |
| AA408396      | -0.364 | 2.557  | -3.091 | 0.007 | 0.066 | -2.451 |
| 2310079F09Rik | -0.490 | 3.140  | -3.091 | 0.007 | 0.066 | -2.452 |
| 6030468B19Rik | -0.531 | 4.426  | -3.091 | 0.007 | 0.066 | -2.452 |
| Moxd1         | -0.475 | 3.387  | -3.090 | 0.007 | 0.066 | -2.454 |
| Limd2         | 0.466  | 7.615  | 3.090  | 0.007 | 0.066 | -2.454 |
| Primal        | -1.493 | 5.971  | -3.090 | 0.007 | 0.066 | -2.455 |
| Arid4a        | 0.715  | 5.732  | 3.089  | 0.007 | 0.066 | -2.457 |
| Ppat          | -0.973 | 5.857  | -3.088 | 0.007 | 0.066 | -2.457 |
| Zcwpw2        | -0.405 | 3.718  | -3.088 | 0.007 | 0.066 | -2.457 |
| C130021I20Rik | -0.474 | 3.974  | -3.088 | 0.007 | 0.066 | -2.459 |
| Hagh1         | -0.744 | 8.111  | -3.087 | 0.007 | 0.066 | -2.461 |
| C76938        | -0.480 | 3.152  | -3.085 | 0.007 | 0.066 | -2.465 |
| Atic          | 0.574  | 9.170  | 3.084  | 0.007 | 0.066 | -2.465 |
| Kcnb1         | -0.514 | 11.044 | -3.084 | 0.007 | 0.066 | -2.466 |
| Gcnt7         | -0.348 | 3.845  | -3.084 | 0.007 | 0.066 | -2.466 |
| Mtor          | -0.732 | 7.938  | -3.084 | 0.007 | 0.066 | -2.466 |
| 4930529I22Rik | -0.549 | 2.838  | -3.083 | 0.007 | 0.066 | -2.468 |
| Fam214b       | 0.410  | 7.213  | 3.083  | 0.007 | 0.066 | -2.468 |
| Dio3os        | -0.425 | 5.981  | -3.083 | 0.007 | 0.066 | -2.468 |
| Myt1          | -0.378 | 3.565  | -3.083 | 0.007 | 0.066 | -2.468 |
| Inpp5d        | 0.599  | 7.021  | 3.082  | 0.007 | 0.066 | -2.469 |
| Wdr82         | 0.537  | 7.885  | 3.082  | 0.007 | 0.066 | -2.470 |
| Fsip1         | -0.462 | 3.926  | -3.081 | 0.007 | 0.066 | -2.473 |
| Efhc2         | -0.596 | 3.113  | -3.081 | 0.007 | 0.066 | -2.473 |
| AI463170      | -0.543 | 5.273  | -3.080 | 0.007 | 0.067 | -2.474 |
| Gm5620        | 0.661  | 12.412 | 3.079  | 0.007 | 0.067 | -2.476 |
| Mex3a         | -0.706 | 6.425  | -3.079 | 0.007 | 0.067 | -2.477 |
| Hlcs          | -0.663 | 6.843  | -3.078 | 0.007 | 0.067 | -2.479 |
| Myo3b         | -0.489 | 2.855  | -3.078 | 0.007 | 0.067 | -2.479 |
| Slc46a3       | -0.514 | 4.669  | -3.076 | 0.007 | 0.067 | -2.482 |

|               |        |        |        |       |       |        |
|---------------|--------|--------|--------|-------|-------|--------|
| A930004D18Rik | -0.322 | 2.859  | -3.075 | 0.007 | 0.067 | -2.484 |
| Gm11787       | 0.973  | 7.345  | 3.074  | 0.007 | 0.067 | -2.485 |
| E130311K13Rik | -0.648 | 5.697  | -3.073 | 0.007 | 0.067 | -2.488 |
| Glce          | -0.407 | 4.513  | -3.072 | 0.007 | 0.067 | -2.489 |
| Rpl10a        | 0.298  | 12.704 | 3.072  | 0.007 | 0.067 | -2.490 |
| Acaa2         | -0.545 | 9.399  | -3.072 | 0.007 | 0.067 | -2.491 |
| Frmpd1        | -0.426 | 4.388  | -3.071 | 0.007 | 0.068 | -2.493 |
| C80360        | -0.417 | 4.240  | -3.070 | 0.007 | 0.068 | -2.493 |
| Traf7         | 0.460  | 7.384  | 3.070  | 0.007 | 0.068 | -2.493 |
| Syne4         | -0.533 | 4.428  | -3.070 | 0.007 | 0.068 | -2.494 |
| Zfp608        | 0.551  | 6.664  | 3.070  | 0.007 | 0.068 | -2.494 |
| Lrrc66        | 0.466  | 6.681  | 3.070  | 0.007 | 0.068 | -2.495 |
| Phf21a        | 0.784  | 7.165  | 3.069  | 0.007 | 0.068 | -2.495 |
| Nkiras1       | -0.473 | 6.660  | -3.069 | 0.007 | 0.068 | -2.496 |
| 9430081I23Rik | -0.427 | 4.118  | -3.069 | 0.007 | 0.068 | -2.496 |
| D17Erttd763e  | -0.386 | 3.586  | -3.069 | 0.007 | 0.068 | -2.497 |
| Hnrnp2        | 0.393  | 8.934  | 3.068  | 0.007 | 0.068 | -2.498 |
| Gna15         | -0.548 | 3.856  | -3.068 | 0.007 | 0.068 | -2.498 |
| Plcd1         | -0.764 | 6.706  | -3.068 | 0.007 | 0.068 | -2.499 |
| Rbp3          | -0.513 | 4.965  | -3.067 | 0.007 | 0.068 | -2.500 |
| Ep400         | 0.342  | 8.154  | 3.067  | 0.007 | 0.068 | -2.501 |
| 9430064I24Rik | -0.386 | 3.462  | -3.066 | 0.007 | 0.068 | -2.502 |
| Foxd1         | -0.391 | 2.686  | -3.066 | 0.007 | 0.068 | -2.502 |
| Rab42         | 0.446  | 3.159  | 3.065  | 0.007 | 0.068 | -2.503 |
| Zfp358        | -0.427 | 5.924  | -3.065 | 0.007 | 0.068 | -2.503 |
| Slmo1         | -0.373 | 6.113  | -3.065 | 0.007 | 0.068 | -2.504 |
| Epha1         | 1.105  | 5.859  | 3.065  | 0.007 | 0.068 | -2.504 |
| Ltc4s         | 0.548  | 7.083  | 3.065  | 0.007 | 0.068 | -2.504 |
| BC048609      | -0.321 | 3.045  | -3.064 | 0.007 | 0.068 | -2.506 |
| Bmyc          | -0.747 | 7.093  | -3.064 | 0.007 | 0.068 | -2.507 |
| Bbx           | -1.001 | 3.665  | -3.064 | 0.007 | 0.068 | -2.507 |
| Aif11         | -0.949 | 7.870  | -3.064 | 0.007 | 0.068 | -2.507 |
| Pdzd4         | -0.412 | 3.940  | -3.064 | 0.007 | 0.068 | -2.507 |
| Zfp78         | -0.600 | 3.064  | -3.063 | 0.007 | 0.068 | -2.507 |
| Vps37c        | 0.727  | 8.021  | 3.063  | 0.007 | 0.068 | -2.508 |
| Tmem44        | -0.398 | 2.479  | -3.063 | 0.007 | 0.068 | -2.509 |
| LOC100503594  | -0.467 | 4.136  | -3.062 | 0.007 | 0.068 | -2.510 |
| D15Erttd621e  | -0.712 | 8.507  | -3.062 | 0.007 | 0.068 | -2.510 |
| LOC102637500  | -0.358 | 2.859  | -3.061 | 0.007 | 0.068 | -2.511 |
| Gnaq          | 0.462  | 7.698  | 3.061  | 0.007 | 0.068 | -2.511 |
| Hist1h3f      | -0.420 | 4.236  | -3.061 | 0.007 | 0.068 | -2.512 |
| LOC102636737  | -0.535 | 5.122  | -3.060 | 0.007 | 0.068 | -2.513 |
| AU015230      | -0.361 | 3.000  | -3.060 | 0.007 | 0.068 | -2.514 |
| Rnf222        | -0.544 | 5.581  | -3.059 | 0.007 | 0.068 | -2.515 |
| Tmem88b       | -0.419 | 3.949  | -3.059 | 0.007 | 0.068 | -2.516 |
| Gm20324       | -0.422 | 4.556  | -3.059 | 0.007 | 0.068 | -2.516 |
| 4930573G07Rik | -0.559 | 3.323  | -3.058 | 0.007 | 0.068 | -2.517 |
| LOC102642250  | 0.593  | 8.728  | 3.057  | 0.007 | 0.068 | -2.520 |
| C030007D22Rik | -0.393 | 2.254  | -3.057 | 0.007 | 0.068 | -2.521 |
| Rapgef4       | -0.571 | 4.104  | -3.056 | 0.007 | 0.068 | -2.522 |

|               |        |        |        |       |       |        |
|---------------|--------|--------|--------|-------|-------|--------|
| Stard7        | -0.378 | 4.401  | -3.056 | 0.007 | 0.068 | -2.522 |
| 9530020I12Rik | -0.552 | 3.297  | -3.056 | 0.007 | 0.068 | -2.523 |
| Grm5          | -0.360 | 2.305  | -3.055 | 0.007 | 0.068 | -2.524 |
| Ptgs2         | 1.306  | 4.396  | 3.055  | 0.007 | 0.068 | -2.525 |
| Cml3          | -0.433 | 2.952  | -3.055 | 0.007 | 0.068 | -2.525 |
| Knstrn        | 0.731  | 6.947  | 3.054  | 0.007 | 0.068 | -2.525 |
| Pr1           | -0.489 | 3.376  | -3.054 | 0.007 | 0.068 | -2.526 |
| Rab5c         | 0.566  | 8.204  | 3.053  | 0.007 | 0.068 | -2.527 |
| Eltd1         | -0.836 | 4.926  | -3.053 | 0.007 | 0.068 | -2.528 |
| Gpihbp1       | -0.471 | 5.473  | -3.053 | 0.007 | 0.068 | -2.528 |
| LOC102643125  | -0.355 | 2.314  | -3.053 | 0.007 | 0.068 | -2.528 |
| Tspan9        | -0.648 | 7.266  | -3.053 | 0.007 | 0.068 | -2.529 |
| Ttc13         | 0.469  | 7.932  | 3.053  | 0.007 | 0.068 | -2.529 |
| Anxa13        | -2.042 | 5.937  | -3.052 | 0.007 | 0.068 | -2.529 |
| Apoo          | -0.884 | 8.988  | -3.052 | 0.007 | 0.068 | -2.530 |
| Slc44a4       | 0.412  | 10.985 | 3.052  | 0.007 | 0.068 | -2.530 |
| Zfp40         | -0.489 | 2.724  | -3.052 | 0.007 | 0.068 | -2.530 |
| Zfp626        | -0.333 | 2.950  | -3.050 | 0.007 | 0.069 | -2.533 |
| Efna2         | -0.543 | 4.653  | -3.050 | 0.007 | 0.069 | -2.534 |
| Ctnnal1       | -0.548 | 4.530  | -3.050 | 0.007 | 0.069 | -2.534 |
| Spem1         | -0.583 | 5.917  | -3.050 | 0.007 | 0.069 | -2.535 |
| G3bp1         | 0.641  | 9.630  | 3.049  | 0.007 | 0.069 | -2.535 |
| AI844685      | -1.565 | 5.892  | -3.049 | 0.007 | 0.069 | -2.536 |
| Gm17399       | -0.404 | 3.303  | -3.049 | 0.007 | 0.069 | -2.536 |
| Arap1         | 0.437  | 7.337  | 3.049  | 0.007 | 0.069 | -2.536 |
| 1700026D08Rik | -0.415 | 2.664  | -3.048 | 0.007 | 0.069 | -2.537 |
| Gpr162        | -0.592 | 6.526  | -3.048 | 0.007 | 0.069 | -2.539 |
| Nid2          | -0.675 | 3.426  | -3.048 | 0.007 | 0.069 | -2.539 |
| Rhox9         | -0.508 | 4.608  | -3.048 | 0.007 | 0.069 | -2.539 |
| Crybb3        | -0.409 | 5.086  | -3.048 | 0.007 | 0.069 | -2.539 |
| Vtcn1         | 0.681  | 4.029  | 3.047  | 0.007 | 0.069 | -2.540 |
| Slc25a39      | -0.463 | 12.344 | -3.047 | 0.007 | 0.069 | -2.541 |
| 4930447K03Rik | -0.495 | 4.204  | -3.046 | 0.007 | 0.069 | -2.541 |
| Plagl1        | -0.931 | 9.185  | -3.046 | 0.007 | 0.069 | -2.542 |
| Fat3          | -0.581 | 4.025  | -3.046 | 0.007 | 0.069 | -2.543 |
| Ndufa1        | -0.515 | 11.828 | -3.045 | 0.007 | 0.069 | -2.543 |
| Fgfr1op       | 0.364  | 7.591  | 3.045  | 0.007 | 0.069 | -2.544 |
| Adad2         | -0.431 | 4.797  | -3.045 | 0.007 | 0.069 | -2.544 |
| 9530001P21Rik | -0.530 | 4.074  | -3.045 | 0.007 | 0.069 | -2.544 |
| B9d1os        | -0.393 | 3.657  | -3.044 | 0.007 | 0.069 | -2.547 |
| Pax4          | -0.471 | 4.145  | -3.042 | 0.007 | 0.069 | -2.549 |
| Barhl1        | -0.402 | 2.865  | -3.042 | 0.007 | 0.069 | -2.549 |
| Doc2b         | -0.575 | 3.951  | -3.042 | 0.007 | 0.069 | -2.551 |
| Smco3         | -0.387 | 2.327  | -3.042 | 0.007 | 0.069 | -2.551 |
| Ltf           | 3.056  | 9.549  | 3.042  | 0.007 | 0.069 | -2.551 |
| Foxa2         | -1.264 | 8.737  | -3.041 | 0.007 | 0.069 | -2.551 |
| Rgs9          | -0.407 | 6.284  | -3.041 | 0.007 | 0.069 | -2.552 |
| Map2          | -0.391 | 3.026  | -3.041 | 0.007 | 0.069 | -2.552 |
| Ndufs3        | -0.522 | 10.301 | -3.041 | 0.007 | 0.069 | -2.552 |
| Fam83e        | 0.822  | 9.372  | 3.041  | 0.007 | 0.069 | -2.552 |

|               |        |        |        |       |       |        |
|---------------|--------|--------|--------|-------|-------|--------|
| Llgl2         | -0.409 | 9.241  | -3.041 | 0.007 | 0.069 | -2.552 |
| C4a           | 1.822  | 8.397  | 3.041  | 0.007 | 0.069 | -2.553 |
| Adam6a        | -0.462 | 3.614  | -3.040 | 0.007 | 0.069 | -2.553 |
| 2900092N22Rik | -0.416 | 3.067  | -3.040 | 0.007 | 0.069 | -2.553 |
| AA408251      | -0.550 | 3.089  | -3.039 | 0.007 | 0.069 | -2.555 |
| Cdca7         | 0.909  | 6.414  | 3.039  | 0.007 | 0.069 | -2.556 |
| Neto1         | -0.580 | 4.944  | -3.039 | 0.007 | 0.069 | -2.556 |
| Fbxl17        | -0.409 | 5.641  | -3.038 | 0.007 | 0.069 | -2.557 |
| Atp6v0e       | -0.511 | 10.266 | -3.038 | 0.007 | 0.069 | -2.557 |
| Dock1         | -0.527 | 3.580  | -3.038 | 0.007 | 0.069 | -2.558 |
| 2010001E11Rik | -0.491 | 5.481  | -3.038 | 0.007 | 0.069 | -2.558 |
| Clql2         | -0.440 | 4.129  | -3.038 | 0.007 | 0.069 | -2.558 |
| Osr2          | -0.409 | 2.633  | -3.036 | 0.007 | 0.069 | -2.561 |
| Fam212b       | -0.403 | 3.570  | -3.036 | 0.007 | 0.069 | -2.562 |
| Myh6          | -0.520 | 3.865  | -3.036 | 0.007 | 0.069 | -2.563 |
| Cst10         | -0.444 | 2.941  | -3.035 | 0.007 | 0.069 | -2.565 |
| Mmd2          | -0.470 | 3.910  | -3.035 | 0.007 | 0.069 | -2.565 |
| Rps24         | 0.313  | 11.950 | 3.034  | 0.007 | 0.070 | -2.566 |
| Fbxo27        | -0.501 | 5.546  | -3.034 | 0.007 | 0.070 | -2.566 |
| AU015581      | -0.542 | 3.188  | -3.033 | 0.007 | 0.070 | -2.567 |
| Ube2q11       | -0.402 | 4.313  | -3.033 | 0.007 | 0.070 | -2.567 |
| Papss2        | -0.755 | 8.461  | -3.033 | 0.007 | 0.070 | -2.568 |
| Slc45a4       | -0.339 | 7.879  | -3.033 | 0.007 | 0.070 | -2.568 |
| Pnpla2        | -0.419 | 8.762  | -3.033 | 0.007 | 0.070 | -2.568 |
| Slc25a46      | -0.315 | 9.367  | -3.032 | 0.007 | 0.070 | -2.569 |
| Mboat4        | -0.591 | 4.637  | -3.032 | 0.007 | 0.070 | -2.569 |
| Gm10436       | -0.341 | 2.332  | -3.032 | 0.007 | 0.070 | -2.570 |
| 4930453H23Rik | -0.335 | 2.751  | -3.032 | 0.007 | 0.070 | -2.571 |
| Actl10        | -0.586 | 4.949  | -3.030 | 0.007 | 0.070 | -2.574 |
| Ppm1l         | -0.712 | 5.557  | -3.030 | 0.007 | 0.070 | -2.574 |
| Ncapg         | 1.110  | 5.160  | 3.029  | 0.007 | 0.070 | -2.575 |
| 4931429L15Rik | -0.427 | 6.467  | -3.029 | 0.007 | 0.070 | -2.575 |
| 9430052A13Rik | -0.461 | 4.081  | -3.029 | 0.007 | 0.070 | -2.577 |
| St14          | 0.431  | 10.452 | 3.028  | 0.007 | 0.070 | -2.579 |
| Gm27040       | -0.452 | 4.135  | -3.027 | 0.007 | 0.070 | -2.579 |
| AV039307      | -0.575 | 3.658  | -3.027 | 0.008 | 0.070 | -2.581 |
| Cd209f        | -0.582 | 5.547  | -3.026 | 0.008 | 0.070 | -2.581 |
| Ptpro         | -0.543 | 5.718  | -3.026 | 0.008 | 0.070 | -2.582 |
| Eif4e         | 0.442  | 8.042  | 3.025  | 0.008 | 0.070 | -2.584 |
| Plcb4         | -0.825 | 3.641  | -3.025 | 0.008 | 0.070 | -2.585 |
| Slc2a5        | -1.009 | 6.452  | -3.024 | 0.008 | 0.070 | -2.585 |
| Fabp12        | -1.681 | 5.708  | -3.024 | 0.008 | 0.070 | -2.587 |
| LOC102639781  | -0.480 | 3.588  | -3.023 | 0.008 | 0.070 | -2.587 |
| Dync1i1       | -0.410 | 2.709  | -3.023 | 0.008 | 0.070 | -2.588 |
| Fntb          | 0.382  | 7.171  | 3.023  | 0.008 | 0.070 | -2.588 |
| Adamts12      | -0.499 | 6.322  | -3.022 | 0.008 | 0.071 | -2.590 |
| Defb10        | -0.458 | 3.096  | -3.022 | 0.008 | 0.071 | -2.590 |
| H2-DMb1       | 3.806  | 8.506  | 3.021  | 0.008 | 0.071 | -2.591 |
| Tnfrsf1b      | 0.737  | 8.006  | 3.021  | 0.008 | 0.071 | -2.591 |
| 2310079G19Rik | -0.436 | 4.251  | -3.021 | 0.008 | 0.071 | -2.592 |



|               |        |        |        |       |       |        |
|---------------|--------|--------|--------|-------|-------|--------|
| Hpgd          | -0.817 | 9.585  | -3.020 | 0.008 | 0.071 | -2.594 |
| Casp8ap2      | 0.564  | 7.397  | 3.020  | 0.008 | 0.071 | -2.594 |
| B930036G03Rik | -0.506 | 6.732  | -3.020 | 0.008 | 0.071 | -2.595 |
| Pitpnm1       | 0.556  | 6.840  | 3.019  | 0.008 | 0.071 | -2.595 |
| Prpsap2       | -0.438 | 7.464  | -3.019 | 0.008 | 0.071 | -2.595 |
| C230096K16Rik | -0.535 | 4.204  | -3.019 | 0.008 | 0.071 | -2.595 |
| Hddc3         | -0.496 | 4.085  | -3.018 | 0.008 | 0.071 | -2.598 |
| D11Ertd4e     | -0.440 | 3.977  | -3.017 | 0.008 | 0.071 | -2.599 |
| D7Ertd481e    | -0.447 | 3.955  | -3.017 | 0.008 | 0.071 | -2.600 |
| Znrf2         | -0.459 | 3.864  | -3.017 | 0.008 | 0.071 | -2.600 |
| C130073F10Rik | -0.537 | 3.004  | -3.017 | 0.008 | 0.071 | -2.600 |
| Anp32b        | 0.438  | 10.199 | 3.016  | 0.008 | 0.071 | -2.601 |
| Slc4a2        | -0.680 | 10.432 | -3.016 | 0.008 | 0.071 | -2.601 |
| Gm11149       | -0.388 | 3.464  | -3.016 | 0.008 | 0.071 | -2.602 |
| Aimp1         | 0.569  | 9.082  | 3.016  | 0.008 | 0.071 | -2.602 |
| 1700030K09Rik | -0.320 | 5.721  | -3.016 | 0.008 | 0.071 | -2.602 |
| 4930556N09Rik | -0.390 | 2.830  | -3.015 | 0.008 | 0.071 | -2.603 |
| Lhx5          | -0.757 | 3.876  | -3.015 | 0.008 | 0.071 | -2.604 |
| 3830417A13Rik | -0.524 | 3.930  | -3.014 | 0.008 | 0.071 | -2.606 |
| Fkbp9         | -0.586 | 8.785  | -3.013 | 0.008 | 0.071 | -2.608 |
| Armcx4        | -1.233 | 4.358  | -3.013 | 0.008 | 0.071 | -2.608 |
| Tram2         | -0.553 | 4.176  | -3.012 | 0.008 | 0.071 | -2.610 |
| 4933411E08Rik | -0.477 | 3.009  | -3.011 | 0.008 | 0.071 | -2.612 |
| Zfp563        | -0.537 | 5.406  | -3.010 | 0.008 | 0.072 | -2.614 |
| Paox          | 0.985  | 7.430  | 3.010  | 0.008 | 0.072 | -2.614 |
| Tnni3         | -2.514 | 8.049  | -3.009 | 0.008 | 0.072 | -2.615 |
| 4930578I07Rik | -0.373 | 4.714  | -3.009 | 0.008 | 0.072 | -2.616 |
| Myef2         | 0.616  | 3.277  | 3.009  | 0.008 | 0.072 | -2.616 |
| D11Ertd506e   | -0.403 | 3.848  | -3.008 | 0.008 | 0.072 | -2.617 |
| Pigv          | -0.313 | 5.388  | -3.008 | 0.008 | 0.072 | -2.618 |
| Srd5a3        | -0.433 | 6.822  | -3.008 | 0.008 | 0.072 | -2.618 |
| Rad54l2       | -0.444 | 5.382  | -3.006 | 0.008 | 0.072 | -2.621 |
| Padi6         | -0.409 | 3.507  | -3.006 | 0.008 | 0.072 | -2.621 |
| Gja3          | -0.443 | 4.274  | -3.006 | 0.008 | 0.072 | -2.622 |
| Bean1         | -0.355 | 3.040  | -3.006 | 0.008 | 0.072 | -2.622 |
| Csrp2         | -0.404 | 10.121 | -3.005 | 0.008 | 0.072 | -2.623 |
| 2610306M01Rik | -0.639 | 5.654  | -3.005 | 0.008 | 0.072 | -2.624 |
| Trio          | 0.652  | 7.779  | 3.004  | 0.008 | 0.072 | -2.625 |
| Nbr1          | -0.427 | 9.587  | -3.004 | 0.008 | 0.072 | -2.626 |
| Usp7          | 0.436  | 9.384  | 3.004  | 0.008 | 0.072 | -2.626 |
| Cyp2b10       | -1.238 | 4.750  | -3.003 | 0.008 | 0.072 | -2.627 |
| Adrbk1        | 0.483  | 8.396  | 3.002  | 0.008 | 0.072 | -2.630 |
| Stom          | 1.290  | 6.587  | 3.001  | 0.008 | 0.072 | -2.631 |
| Col4a3        | -0.750 | 4.766  | -3.001 | 0.008 | 0.072 | -2.631 |
| Tmem246       | -0.872 | 10.199 | -3.001 | 0.008 | 0.072 | -2.632 |
| Srsf4         | 0.291  | 8.832  | 3.001  | 0.008 | 0.072 | -2.632 |
| Bri3          | -0.602 | 9.988  | -3.000 | 0.008 | 0.072 | -2.633 |
| Elmsan1       | -0.465 | 3.838  | -3.000 | 0.008 | 0.072 | -2.634 |
| Zcchc7        | 0.853  | 8.281  | 2.998  | 0.008 | 0.073 | -2.638 |
| Smndc1        | 0.583  | 6.815  | 2.998  | 0.008 | 0.073 | -2.638 |

|               |        |        |        |       |       |        |
|---------------|--------|--------|--------|-------|-------|--------|
| Tmem52b       | -0.489 | 3.393  | -2.997 | 0.008 | 0.073 | -2.639 |
| Opn4          | -0.469 | 5.356  | -2.997 | 0.008 | 0.073 | -2.640 |
| 1700024P04Rik | -0.397 | 3.419  | -2.996 | 0.008 | 0.073 | -2.641 |
| Braf          | -0.460 | 4.561  | -2.996 | 0.008 | 0.073 | -2.642 |
| Taf1d         | 0.816  | 3.760  | 2.996  | 0.008 | 0.073 | -2.642 |
| Wnk4          | -0.732 | 5.525  | -2.996 | 0.008 | 0.073 | -2.642 |
| Impact        | 0.663  | 5.626  | 2.996  | 0.008 | 0.073 | -2.642 |
| Gstcd         | 0.504  | 6.541  | 2.996  | 0.008 | 0.073 | -2.642 |
| 4933417G07Rik | -0.382 | 3.326  | -2.995 | 0.008 | 0.073 | -2.643 |
| Zcchc2        | 0.578  | 7.184  | 2.995  | 0.008 | 0.073 | -2.644 |
| B230354K17Rik | 0.727  | 5.972  | 2.994  | 0.008 | 0.073 | -2.645 |
| Gm19589       | -0.331 | 2.989  | -2.994 | 0.008 | 0.073 | -2.645 |
| Ankrd40       | -0.425 | 8.281  | -2.994 | 0.008 | 0.073 | -2.646 |
| 3830408C21Rik | -0.402 | 2.932  | -2.994 | 0.008 | 0.073 | -2.646 |
| Trim31        | 1.692  | 5.919  | 2.993  | 0.008 | 0.073 | -2.647 |
| Dusp18        | -0.372 | 6.331  | -2.993 | 0.008 | 0.073 | -2.648 |
| D030055H07Rik | -0.566 | 3.504  | -2.993 | 0.008 | 0.073 | -2.648 |
| Sema4f        | -0.387 | 4.835  | -2.993 | 0.008 | 0.073 | -2.648 |
| 3110018I06Rik | -0.425 | 3.186  | -2.992 | 0.008 | 0.073 | -2.650 |
| Sirt6         | -0.328 | 5.875  | -2.991 | 0.008 | 0.073 | -2.651 |
| Rab43         | -0.475 | 8.661  | -2.991 | 0.008 | 0.073 | -2.651 |
| 4933437F24Rik | -0.375 | 3.015  | -2.991 | 0.008 | 0.073 | -2.652 |
| H2-Eb1        | 3.150  | 10.248 | 2.990  | 0.008 | 0.073 | -2.653 |
| Lcn9          | -0.396 | 3.027  | -2.990 | 0.008 | 0.073 | -2.653 |
| Klh129        | -0.374 | 2.630  | -2.990 | 0.008 | 0.073 | -2.654 |
| Hyal3         | -0.429 | 4.662  | -2.989 | 0.008 | 0.073 | -2.655 |
| Cyb5r3        | -0.306 | 9.300  | -2.989 | 0.008 | 0.073 | -2.655 |
| A130071D04Rik | 0.921  | 3.926  | 2.989  | 0.008 | 0.073 | -2.656 |
| Nabp1         | -0.612 | 6.634  | -2.988 | 0.008 | 0.073 | -2.657 |
| 2210010C04Rik | -1.682 | 3.471  | -2.987 | 0.008 | 0.073 | -2.659 |
| 1810009N02Rik | -0.384 | 6.657  | -2.987 | 0.008 | 0.073 | -2.659 |
| Pard6a        | -0.872 | 5.784  | -2.986 | 0.008 | 0.073 | -2.661 |
| Tmem50b       | -1.068 | 9.327  | -2.986 | 0.008 | 0.073 | -2.662 |
| Scly          | 0.494  | 7.237  | 2.986  | 0.008 | 0.073 | -2.662 |
| Irak2         | 0.784  | 7.234  | 2.986  | 0.008 | 0.073 | -2.662 |
| Zbtb39        | 0.444  | 6.877  | 2.985  | 0.008 | 0.073 | -2.662 |
| Nrd1          | -0.380 | 9.185  | -2.985 | 0.008 | 0.073 | -2.663 |
| AA408456      | -0.542 | 4.293  | -2.985 | 0.008 | 0.073 | -2.663 |
| Zbtb6         | 0.441  | 7.627  | 2.985  | 0.008 | 0.073 | -2.663 |
| Hist1h2bc     | -0.615 | 9.796  | -2.985 | 0.008 | 0.073 | -2.664 |
| Usp39         | 0.583  | 8.900  | 2.985  | 0.008 | 0.073 | -2.664 |
| 4930408017Rik | -0.308 | 5.507  | -2.984 | 0.008 | 0.073 | -2.665 |
| Tnfrsf21      | -0.635 | 8.536  | -2.984 | 0.008 | 0.073 | -2.665 |
| Gpsm2         | 0.811  | 7.300  | 2.984  | 0.008 | 0.073 | -2.666 |
| Gsdmc2        | 1.532  | 9.701  | 2.983  | 0.008 | 0.074 | -2.668 |
| Dnal1         | -0.482 | 4.135  | -2.981 | 0.008 | 0.074 | -2.670 |
| Syt14         | -0.574 | 8.209  | -2.981 | 0.008 | 0.074 | -2.671 |
| Slc4a1ap      | 0.424  | 6.315  | 2.981  | 0.008 | 0.074 | -2.672 |
| Plcx2         | 0.895  | 6.622  | 2.980  | 0.008 | 0.074 | -2.672 |
| Gm12538       | -0.431 | 7.188  | -2.980 | 0.008 | 0.074 | -2.674 |

|               |        |        |        |       |       |        |
|---------------|--------|--------|--------|-------|-------|--------|
| Spats1        | -0.535 | 3.764  | -2.979 | 0.008 | 0.074 | -2.674 |
| Msrbl         | -0.449 | 8.897  | -2.979 | 0.008 | 0.074 | -2.675 |
| 4930556J24Rik | -0.386 | 3.020  | -2.979 | 0.008 | 0.074 | -2.676 |
| Nup85         | 0.513  | 7.621  | 2.979  | 0.008 | 0.074 | -2.676 |
| Fancm         | -0.372 | 3.709  | -2.978 | 0.008 | 0.074 | -2.676 |
| Clqa          | 1.830  | 7.380  | 2.978  | 0.008 | 0.074 | -2.677 |
| C2            | 0.654  | 4.943  | 2.978  | 0.008 | 0.074 | -2.677 |
| Sox1          | -0.432 | 3.363  | -2.977 | 0.008 | 0.074 | -2.679 |
| Txnrd1        | 0.487  | 10.305 | 2.977  | 0.008 | 0.074 | -2.679 |
| 4930551A22Rik | -0.536 | 4.988  | -2.977 | 0.008 | 0.074 | -2.679 |
| Ccdc134       | -0.505 | 4.034  | -2.977 | 0.008 | 0.074 | -2.680 |
| Dbn1          | -1.230 | 6.313  | -2.977 | 0.008 | 0.074 | -2.680 |
| Pdgfr1        | -0.525 | 3.213  | -2.975 | 0.008 | 0.074 | -2.682 |
| Endod1        | -0.551 | 5.684  | -2.974 | 0.008 | 0.074 | -2.684 |
| Hoxd3os1      | -0.415 | 3.346  | -2.974 | 0.008 | 0.074 | -2.685 |
| D17Ertd191e   | -0.424 | 2.883  | -2.974 | 0.008 | 0.074 | -2.686 |
| C81608        | -0.505 | 3.754  | -2.974 | 0.008 | 0.074 | -2.686 |
| Myola         | 0.545  | 9.487  | 2.973  | 0.008 | 0.074 | -2.687 |
| Thap6         | -0.339 | 3.706  | -2.973 | 0.008 | 0.074 | -2.688 |
| Uxs1          | 0.506  | 6.639  | 2.972  | 0.008 | 0.075 | -2.689 |
| Pola2         | -0.402 | 3.281  | -2.972 | 0.008 | 0.075 | -2.690 |
| Clvs1         | -0.388 | 3.681  | -2.971 | 0.008 | 0.075 | -2.690 |
| Txndc8        | -0.362 | 3.092  | -2.971 | 0.008 | 0.075 | -2.691 |
| Brd4          | 0.546  | 8.400  | 2.970  | 0.008 | 0.075 | -2.693 |
| Ube2v2        | 0.666  | 7.495  | 2.970  | 0.008 | 0.075 | -2.694 |
| Akt1          | 0.496  | 9.969  | 2.968  | 0.008 | 0.075 | -2.696 |
| BC018242      | -0.483 | 4.769  | -2.968 | 0.009 | 0.075 | -2.697 |
| Smarcc2       | -0.386 | 7.790  | -2.967 | 0.009 | 0.075 | -2.698 |
| Ttc18         | -0.392 | 2.988  | -2.967 | 0.009 | 0.075 | -2.698 |
| 4933413C19Rik | -0.382 | 3.852  | -2.967 | 0.009 | 0.075 | -2.699 |
| Atp5s         | -0.680 | 6.388  | -2.967 | 0.009 | 0.075 | -2.699 |
| Fktn          | -0.612 | 4.640  | -2.965 | 0.009 | 0.075 | -2.702 |
| Prss37        | -0.285 | 2.062  | -2.965 | 0.009 | 0.075 | -2.703 |
| Sh3d21        | -0.400 | 5.922  | -2.964 | 0.009 | 0.075 | -2.706 |
| 5730405N03Rik | -0.362 | 4.366  | -2.963 | 0.009 | 0.075 | -2.706 |
| D7Ertd523e    | -0.440 | 3.464  | -2.963 | 0.009 | 0.076 | -2.707 |
| Mzb1          | 1.607  | 5.350  | 2.963  | 0.009 | 0.076 | -2.708 |
| Dscam11       | -0.475 | 3.543  | -2.962 | 0.009 | 0.076 | -2.709 |
| Maoa          | 1.116  | 7.434  | 2.962  | 0.009 | 0.076 | -2.709 |
| Ctsh          | 0.795  | 9.813  | 2.962  | 0.009 | 0.076 | -2.709 |
| Cep55         | 0.946  | 7.808  | 2.962  | 0.009 | 0.076 | -2.710 |
| Krt76         | -0.403 | 4.742  | -2.961 | 0.009 | 0.076 | -2.710 |
| Fam122c       | -0.462 | 3.057  | -2.960 | 0.009 | 0.076 | -2.713 |
| AI118078      | -0.463 | 5.380  | -2.960 | 0.009 | 0.076 | -2.713 |
| Gnaz          | -0.773 | 4.598  | -2.960 | 0.009 | 0.076 | -2.714 |
| Gpaal         | -0.545 | 6.527  | -2.960 | 0.009 | 0.076 | -2.714 |
| 2300002M23Rik | -0.528 | 3.851  | -2.959 | 0.009 | 0.076 | -2.714 |
| Igfals        | -0.443 | 5.149  | -2.958 | 0.009 | 0.076 | -2.716 |
| Slc9a3r2      | -0.522 | 6.834  | -2.958 | 0.009 | 0.076 | -2.716 |
| 3300002P13Rik | -0.423 | 4.058  | -2.958 | 0.009 | 0.076 | -2.718 |

|               |        |        |        |       |       |        |
|---------------|--------|--------|--------|-------|-------|--------|
| I11f9         | -0.451 | 4.756  | -2.958 | 0.009 | 0.076 | -2.718 |
| Pik3ca        | 0.405  | 6.586  | 2.957  | 0.009 | 0.076 | -2.718 |
| Klra21        | -0.423 | 2.422  | -2.957 | 0.009 | 0.076 | -2.718 |
| 4933438A12Rik | -0.557 | 5.753  | -2.957 | 0.009 | 0.076 | -2.720 |
| Mgea5         | 0.501  | 8.666  | 2.956  | 0.009 | 0.076 | -2.720 |
| Dgke          | -0.464 | 4.611  | -2.956 | 0.009 | 0.076 | -2.721 |
| Kcnk1         | 1.034  | 9.619  | 2.956  | 0.009 | 0.076 | -2.721 |
| I14i1         | -0.700 | 4.965  | -2.956 | 0.009 | 0.076 | -2.722 |
| Etfa          | -0.487 | 10.567 | -2.955 | 0.009 | 0.076 | -2.722 |
| Zrsr2         | -0.309 | 2.682  | -2.955 | 0.009 | 0.076 | -2.723 |
| C030047K22Rik | -0.407 | 2.645  | -2.955 | 0.009 | 0.076 | -2.723 |
| Plp1          | -0.522 | 7.065  | -2.954 | 0.009 | 0.076 | -2.724 |
| Akap3         | -0.417 | 3.135  | -2.954 | 0.009 | 0.076 | -2.725 |
| Tas1r2        | -0.485 | 4.443  | -2.954 | 0.009 | 0.076 | -2.725 |
| Popdc2        | -0.681 | 5.332  | -2.954 | 0.009 | 0.076 | -2.726 |
| 2900011F02Rik | -0.535 | 3.319  | -2.953 | 0.009 | 0.076 | -2.727 |
| Eif3b         | 0.407  | 9.730  | 2.952  | 0.009 | 0.076 | -2.728 |
| 5430427N15Rik | -0.450 | 2.468  | -2.951 | 0.009 | 0.076 | -2.730 |
| Klh16         | 0.687  | 5.030  | 2.950  | 0.009 | 0.077 | -2.732 |
| Cpa5          | -0.489 | 2.786  | -2.950 | 0.009 | 0.077 | -2.732 |
| Myod1         | -0.413 | 4.746  | -2.950 | 0.009 | 0.077 | -2.733 |
| 1700008K24Rik | -0.443 | 3.814  | -2.950 | 0.009 | 0.077 | -2.733 |
| Clec4b1       | -0.313 | 2.432  | -2.949 | 0.009 | 0.077 | -2.734 |
| I12           | -0.583 | 8.710  | -2.949 | 0.009 | 0.077 | -2.736 |
| Pramel6       | -0.317 | 2.904  | -2.948 | 0.009 | 0.077 | -2.736 |
| Ppp1r3fos     | -0.356 | 3.487  | -2.948 | 0.009 | 0.077 | -2.736 |
| Got2          | -0.565 | 10.289 | -2.948 | 0.009 | 0.077 | -2.736 |
| 4930435F18Rik | -0.365 | 2.521  | -2.948 | 0.009 | 0.077 | -2.737 |
| C79557        | -0.433 | 4.197  | -2.948 | 0.009 | 0.077 | -2.737 |
| LOC102635744  | -0.383 | 3.287  | -2.947 | 0.009 | 0.077 | -2.738 |
| Ube2j2        | 0.435  | 9.170  | 2.947  | 0.009 | 0.077 | -2.739 |
| Depdcla       | 0.893  | 4.003  | 2.947  | 0.009 | 0.077 | -2.739 |
| Klf1          | -0.511 | 4.587  | -2.946 | 0.009 | 0.077 | -2.740 |
| Fam126b       | -0.634 | 6.443  | -2.946 | 0.009 | 0.077 | -2.740 |
| Cfhr3         | -0.262 | 2.422  | -2.946 | 0.009 | 0.077 | -2.741 |
| Btbd3         | -0.885 | 7.889  | -2.945 | 0.009 | 0.077 | -2.743 |
| Tulp2         | -0.497 | 2.871  | -2.945 | 0.009 | 0.077 | -2.743 |
| Gm6682        | 0.620  | 6.125  | 2.944  | 0.009 | 0.077 | -2.745 |
| Mettl6        | 0.427  | 6.181  | 2.943  | 0.009 | 0.077 | -2.747 |
| Cr1f1         | -0.970 | 6.274  | -2.942 | 0.009 | 0.077 | -2.748 |
| Kdm4a         | 0.796  | 6.828  | 2.942  | 0.009 | 0.077 | -2.749 |
| Sft2d2        | 0.354  | 7.951  | 2.941  | 0.009 | 0.077 | -2.751 |
| Brap          | -0.377 | 8.332  | -2.941 | 0.009 | 0.077 | -2.751 |
| 1700071K01Rik | -0.388 | 5.073  | -2.940 | 0.009 | 0.077 | -2.751 |
| Grin2b        | -0.532 | 3.841  | -2.940 | 0.009 | 0.077 | -2.752 |
| Psm1          | 0.507  | 9.543  | 2.940  | 0.009 | 0.077 | -2.752 |
| Col18a1       | 1.059  | 6.504  | 2.940  | 0.009 | 0.077 | -2.753 |
| Adcy4         | -0.408 | 4.976  | -2.940 | 0.009 | 0.077 | -2.753 |
| Aasdh         | 0.631  | 6.339  | 2.939  | 0.009 | 0.077 | -2.755 |
| 5430435K18Rik | -0.515 | 2.845  | -2.939 | 0.009 | 0.077 | -2.755 |

|               |        |       |        |       |       |        |
|---------------|--------|-------|--------|-------|-------|--------|
| Ube2d2b       | -0.436 | 2.341 | -2.939 | 0.009 | 0.077 | -2.755 |
| Sacs          | -0.501 | 3.640 | -2.939 | 0.009 | 0.077 | -2.755 |
| Gm6150        | -0.392 | 2.625 | -2.938 | 0.009 | 0.077 | -2.756 |
| Plcl1         | -0.435 | 2.776 | -2.938 | 0.009 | 0.077 | -2.756 |
| Mturn         | -0.474 | 3.609 | -2.938 | 0.009 | 0.077 | -2.756 |
| Gtpbp8        | -0.358 | 4.208 | -2.938 | 0.009 | 0.077 | -2.757 |
| Gm6936        | -0.331 | 3.286 | -2.938 | 0.009 | 0.077 | -2.757 |
| Slc34a2       | -0.438 | 5.694 | -2.937 | 0.009 | 0.077 | -2.757 |
| Tex24         | -0.436 | 2.584 | -2.937 | 0.009 | 0.077 | -2.757 |
| Gsr           | 0.557  | 8.812 | 2.937  | 0.009 | 0.077 | -2.758 |
| Sncb          | -0.476 | 6.052 | -2.936 | 0.009 | 0.078 | -2.760 |
| Ghdc          | 0.559  | 5.670 | 2.936  | 0.009 | 0.078 | -2.760 |
| Dpfl          | -0.420 | 3.724 | -2.936 | 0.009 | 0.078 | -2.761 |
| Pom121        | 0.415  | 7.640 | 2.935  | 0.009 | 0.078 | -2.762 |
| 2900064F13Rik | -0.324 | 2.357 | -2.934 | 0.009 | 0.078 | -2.764 |
| Krtap10-4     | -0.374 | 4.486 | -2.934 | 0.009 | 0.078 | -2.764 |
| Pyhin1        | 1.127  | 5.007 | 2.933  | 0.009 | 0.078 | -2.765 |
| 5430414B12Rik | -0.378 | 2.851 | -2.933 | 0.009 | 0.078 | -2.765 |
| 4930563E18Rik | -0.502 | 4.431 | -2.933 | 0.009 | 0.078 | -2.767 |
| Atxn1         | 0.442  | 8.041 | 2.933  | 0.009 | 0.078 | -2.767 |
| 4930529M08Rik | -0.456 | 4.792 | -2.932 | 0.009 | 0.078 | -2.768 |
| Socs3         | 1.500  | 7.563 | 2.932  | 0.009 | 0.078 | -2.768 |
| 1190002N15Rik | -0.746 | 5.585 | -2.932 | 0.009 | 0.078 | -2.769 |
| AW413774      | -0.446 | 5.500 | -2.930 | 0.009 | 0.078 | -2.771 |
| 1810064F22Rik | -0.493 | 6.933 | -2.929 | 0.009 | 0.078 | -2.773 |
| Gm166         | -0.588 | 4.380 | -2.929 | 0.009 | 0.078 | -2.773 |
| 1110002L01Rik | -0.477 | 4.904 | -2.929 | 0.009 | 0.078 | -2.774 |
| Lyz1          | 2.574  | 9.763 | 2.929  | 0.009 | 0.078 | -2.775 |
| LOC102641068  | -0.378 | 2.935 | -2.928 | 0.009 | 0.078 | -2.776 |
| AU022297      | -0.526 | 3.382 | -2.928 | 0.009 | 0.078 | -2.777 |
| Gpr22         | -0.389 | 2.746 | -2.927 | 0.009 | 0.078 | -2.777 |
| 2900079G21Rik | -0.473 | 3.732 | -2.927 | 0.009 | 0.078 | -2.777 |
| Gm15417       | -0.410 | 6.488 | -2.927 | 0.009 | 0.079 | -2.779 |
| Nat3          | -0.550 | 2.770 | -2.926 | 0.009 | 0.079 | -2.780 |
| 2310030G06Rik | -0.594 | 8.118 | -2.926 | 0.009 | 0.079 | -2.780 |
| Fam86         | -0.508 | 7.280 | -2.926 | 0.009 | 0.079 | -2.781 |
| Strip1        | 0.418  | 7.648 | 2.925  | 0.009 | 0.079 | -2.781 |
| Gpt2          | -0.846 | 6.970 | -2.925 | 0.009 | 0.079 | -2.782 |
| Tiel          | -0.543 | 3.737 | -2.925 | 0.009 | 0.079 | -2.782 |
| Cldnd2        | -0.413 | 3.293 | -2.925 | 0.009 | 0.079 | -2.782 |
| Gm9558        | -0.486 | 3.387 | -2.925 | 0.009 | 0.079 | -2.782 |
| Entpd7        | 0.687  | 6.976 | 2.925  | 0.009 | 0.079 | -2.783 |
| Ppmle         | -1.079 | 3.626 | -2.924 | 0.009 | 0.079 | -2.783 |
| Sfpq          | 0.720  | 8.281 | 2.924  | 0.009 | 0.079 | -2.784 |
| Slc30a8       | -0.479 | 3.200 | -2.923 | 0.009 | 0.079 | -2.787 |
| Nav3          | -0.543 | 3.450 | -2.922 | 0.009 | 0.079 | -2.787 |
| Mios          | -0.391 | 6.459 | -2.922 | 0.009 | 0.079 | -2.787 |
| Sema3c        | -0.652 | 6.189 | -2.922 | 0.009 | 0.079 | -2.788 |
| Rbm8a         | 0.571  | 9.297 | 2.922  | 0.009 | 0.079 | -2.788 |
| 2310057B04Rik | -0.444 | 3.855 | -2.922 | 0.009 | 0.079 | -2.788 |

|               |        |        |        |       |       |        |
|---------------|--------|--------|--------|-------|-------|--------|
| Sox10         | -0.396 | 6.002  | -2.921 | 0.009 | 0.079 | -2.789 |
| Fbx15         | 0.523  | 8.505  | 2.921  | 0.009 | 0.079 | -2.790 |
| 2610528A11Rik | -0.419 | 3.233  | -2.921 | 0.009 | 0.079 | -2.791 |
| Igh-VJ558     | -0.397 | 3.983  | -2.920 | 0.009 | 0.079 | -2.792 |
| Gm5089        | -0.444 | 3.188  | -2.920 | 0.009 | 0.079 | -2.793 |
| C79329        | -0.423 | 2.461  | -2.919 | 0.009 | 0.079 | -2.793 |
| AA589418      | -0.336 | 2.879  | -2.919 | 0.009 | 0.079 | -2.794 |
| 9130221J17Rik | 1.381  | 5.181  | 2.918  | 0.009 | 0.079 | -2.796 |
| Zfp318        | -0.588 | 5.049  | -2.917 | 0.009 | 0.079 | -2.797 |
| Gpr174        | -0.461 | 3.233  | -2.916 | 0.010 | 0.080 | -2.800 |
| 1700012A03Rik | -0.324 | 2.415  | -2.916 | 0.010 | 0.080 | -2.801 |
| P2ry10        | 1.425  | 3.785  | 2.916  | 0.010 | 0.080 | -2.801 |
| Fryl          | 0.707  | 8.726  | 2.915  | 0.010 | 0.080 | -2.801 |
| 1810046K07Rik | 0.639  | 5.547  | 2.915  | 0.010 | 0.080 | -2.801 |
| Mtss11        | -0.391 | 3.916  | -2.915 | 0.010 | 0.080 | -2.802 |
| 5430425E15Rik | -0.433 | 3.124  | -2.915 | 0.010 | 0.080 | -2.802 |
| Siae          | -0.588 | 5.200  | -2.914 | 0.010 | 0.080 | -2.803 |
| Phip          | 0.679  | 7.394  | 2.914  | 0.010 | 0.080 | -2.803 |
| 4930522H14Rik | -0.455 | 3.569  | -2.914 | 0.010 | 0.080 | -2.804 |
| Bsnd          | -0.464 | 3.912  | -2.914 | 0.010 | 0.080 | -2.804 |
| Cul2          | 0.539  | 5.256  | 2.914  | 0.010 | 0.080 | -2.804 |
| LOC102633199  | -0.499 | 4.566  | -2.913 | 0.010 | 0.080 | -2.805 |
| 4933429K18Rik | -0.481 | 4.450  | -2.913 | 0.010 | 0.080 | -2.806 |
| Ep300         | 0.360  | 8.294  | 2.913  | 0.010 | 0.080 | -2.806 |
| Rbm43         | 0.645  | 7.478  | 2.912  | 0.010 | 0.080 | -2.807 |
| Dpy1912       | -0.310 | 2.362  | -2.912 | 0.010 | 0.080 | -2.807 |
| Xbp1          | -0.430 | 10.216 | -2.912 | 0.010 | 0.080 | -2.807 |
| Pnkd          | -1.192 | 7.335  | -2.912 | 0.010 | 0.080 | -2.808 |
| Morc2a        | 0.443  | 6.973  | 2.912  | 0.010 | 0.080 | -2.808 |
| D830044I16Rik | -0.519 | 4.858  | -2.911 | 0.010 | 0.080 | -2.809 |
| Gbgt1         | -0.569 | 3.614  | -2.911 | 0.010 | 0.080 | -2.809 |
| Ndufa3        | -0.514 | 12.055 | -2.911 | 0.010 | 0.080 | -2.810 |
| Capn5         | 0.807  | 9.792  | 2.911  | 0.010 | 0.080 | -2.810 |
| Rab27a        | 0.940  | 5.414  | 2.908  | 0.010 | 0.080 | -2.815 |
| Tpm3          | 0.296  | 12.138 | 2.908  | 0.010 | 0.080 | -2.815 |
| Npy5r         | -0.516 | 3.604  | -2.908 | 0.010 | 0.080 | -2.815 |
| Tcrb-J        | -0.351 | 2.741  | -2.908 | 0.010 | 0.080 | -2.815 |
| Snapc5        | -0.381 | 2.489  | -2.908 | 0.010 | 0.080 | -2.816 |
| Sprn          | -0.437 | 2.952  | -2.907 | 0.010 | 0.080 | -2.818 |
| Cabp1         | -0.457 | 2.915  | -2.907 | 0.010 | 0.080 | -2.818 |
| Slc4a8        | -0.365 | 2.626  | -2.907 | 0.010 | 0.080 | -2.818 |
| Olfir16       | -0.446 | 4.110  | -2.907 | 0.010 | 0.080 | -2.818 |
| Emp2          | -0.850 | 6.624  | -2.906 | 0.010 | 0.080 | -2.819 |
| Gm10501       | -0.382 | 3.085  | -2.906 | 0.010 | 0.080 | -2.819 |
| D630023F18Rik | -0.566 | 2.870  | -2.906 | 0.010 | 0.080 | -2.820 |
| Anxa2         | 1.036  | 11.943 | 2.905  | 0.010 | 0.080 | -2.821 |
| Brsk2         | -0.345 | 2.867  | -2.905 | 0.010 | 0.080 | -2.821 |
| Casp1         | 2.967  | 7.326  | 2.905  | 0.010 | 0.080 | -2.821 |
| BC002288      | 2.770  | 5.768  | 2.905  | 0.010 | 0.080 | -2.822 |
| N28178        | -0.519 | 4.828  | -2.904 | 0.010 | 0.080 | -2.824 |

|               |        |        |        |       |       |        |
|---------------|--------|--------|--------|-------|-------|--------|
| Chrd          | -0.439 | 5.468  | -2.904 | 0.010 | 0.080 | -2.824 |
| Tmem135       | -0.470 | 8.893  | -2.904 | 0.010 | 0.080 | -2.824 |
| Fut7          | -0.380 | 5.169  | -2.903 | 0.010 | 0.080 | -2.825 |
| Ghr           | -0.981 | 8.980  | -2.903 | 0.010 | 0.080 | -2.826 |
| Fbn1          | -0.570 | 4.057  | -2.903 | 0.010 | 0.080 | -2.826 |
| Marveld2      | 0.605  | 7.439  | 2.903  | 0.010 | 0.080 | -2.826 |
| Nostrin       | -0.321 | 8.152  | -2.902 | 0.010 | 0.080 | -2.826 |
| Psd2          | -0.376 | 2.496  | -2.902 | 0.010 | 0.080 | -2.828 |
| Atp5o         | -0.420 | 11.749 | -2.901 | 0.010 | 0.080 | -2.828 |
| Nkx2-4        | -0.537 | 4.936  | -2.901 | 0.010 | 0.080 | -2.829 |
| Mphosph6      | 0.430  | 8.158  | 2.901  | 0.010 | 0.080 | -2.829 |
| U2af2         | 0.387  | 9.584  | 2.901  | 0.010 | 0.080 | -2.829 |
| 7630402I04Rik | -0.844 | 3.593  | -2.901 | 0.010 | 0.081 | -2.830 |
| 6720460K10Rik | -0.383 | 2.874  | -2.900 | 0.010 | 0.081 | -2.831 |
| Art2b         | -0.380 | 2.808  | -2.900 | 0.010 | 0.081 | -2.831 |
| Opcml         | -0.322 | 2.390  | -2.900 | 0.010 | 0.081 | -2.831 |
| LOC102632066  | -0.315 | 4.492  | -2.900 | 0.010 | 0.081 | -2.831 |
| Stag2         | -0.394 | 8.818  | -2.900 | 0.010 | 0.081 | -2.832 |
| Atp2c2        | 1.043  | 6.049  | 2.900  | 0.010 | 0.081 | -2.832 |
| Birc5         | 0.864  | 8.610  | 2.899  | 0.010 | 0.081 | -2.833 |
| Hsd3b1        | -0.367 | 3.494  | -2.899 | 0.010 | 0.081 | -2.834 |
| Hist1h3a      | -0.459 | 3.427  | -2.899 | 0.010 | 0.081 | -2.834 |
| Gm10362       | 0.910  | 7.895  | 2.898  | 0.010 | 0.081 | -2.834 |
| Bcas3         | -0.609 | 4.314  | -2.898 | 0.010 | 0.081 | -2.835 |
| Adamts14      | -0.536 | 5.750  | -2.898 | 0.010 | 0.081 | -2.835 |
| Mxra8         | -0.610 | 6.587  | -2.898 | 0.010 | 0.081 | -2.835 |
| Cd163         | -0.393 | 2.827  | -2.898 | 0.010 | 0.081 | -2.835 |
| Gria2         | -0.446 | 4.179  | -2.898 | 0.010 | 0.081 | -2.835 |
| Synj1         | 0.767  | 6.328  | 2.897  | 0.010 | 0.081 | -2.836 |
| Ripk3         | 1.466  | 6.710  | 2.897  | 0.010 | 0.081 | -2.837 |
| Eif2s2        | 0.556  | 10.849 | 2.897  | 0.010 | 0.081 | -2.837 |
| Fads2         | 1.579  | 6.414  | 2.897  | 0.010 | 0.081 | -2.838 |
| Slc22a29      | -0.381 | 3.115  | -2.897 | 0.010 | 0.081 | -2.838 |
| Mapk3         | 0.331  | 10.941 | 2.895  | 0.010 | 0.081 | -2.841 |
| 4933416I08Rik | -0.490 | 3.668  | -2.895 | 0.010 | 0.081 | -2.841 |
| Mthfd11       | 0.798  | 6.292  | 2.895  | 0.010 | 0.081 | -2.841 |
| Iah1          | -0.711 | 8.886  | -2.895 | 0.010 | 0.081 | -2.841 |
| Mdn1          | 0.713  | 6.403  | 2.895  | 0.010 | 0.081 | -2.842 |
| Scd2          | 0.650  | 10.037 | 2.894  | 0.010 | 0.081 | -2.842 |
| Aes           | -0.378 | 9.570  | -2.893 | 0.010 | 0.081 | -2.845 |
| AU015263      | 1.258  | 5.365  | 2.893  | 0.010 | 0.081 | -2.845 |
| Rogdi         | -0.514 | 7.591  | -2.893 | 0.010 | 0.081 | -2.845 |
| Fbxl19        | 0.771  | 5.754  | 2.893  | 0.010 | 0.081 | -2.846 |
| Pkd211        | -0.474 | 3.293  | -2.892 | 0.010 | 0.081 | -2.848 |
| A330068G13Rik | -0.459 | 2.624  | -2.891 | 0.010 | 0.081 | -2.848 |
| 6230424C14Rik | 0.578  | 6.391  | 2.891  | 0.010 | 0.081 | -2.848 |
| Mob3c         | 0.417  | 5.581  | 2.891  | 0.010 | 0.081 | -2.849 |
| BC030336      | -0.713 | 5.841  | -2.891 | 0.010 | 0.081 | -2.850 |
| Pls3          | -0.733 | 7.742  | -2.891 | 0.010 | 0.081 | -2.850 |
| Rc3h2         | -0.908 | 6.240  | -2.890 | 0.010 | 0.081 | -2.850 |

|               |        |        |        |       |       |        |
|---------------|--------|--------|--------|-------|-------|--------|
| Rdh12         | -0.499 | 3.529  | -2.890 | 0.010 | 0.081 | -2.851 |
| H2-D1         | 1.679  | 10.511 | 2.890  | 0.010 | 0.081 | -2.851 |
| 2310024H09Rik | -0.420 | 2.386  | -2.890 | 0.010 | 0.081 | -2.852 |
| G630016G05Rik | -0.415 | 2.650  | -2.890 | 0.010 | 0.081 | -2.852 |
| Wars2         | 0.445  | 5.061  | 2.890  | 0.010 | 0.081 | -2.852 |
| Dym           | -0.397 | 7.614  | -2.889 | 0.010 | 0.081 | -2.854 |
| Fam45a        | -0.481 | 7.659  | -2.888 | 0.010 | 0.081 | -2.854 |
| Plekha3       | -0.482 | 5.373  | -2.888 | 0.010 | 0.081 | -2.855 |
| Rps7          | 0.286  | 12.687 | 2.888  | 0.010 | 0.081 | -2.856 |
| 1700096K18Rik | -0.510 | 4.499  | -2.887 | 0.010 | 0.081 | -2.856 |
| Cdc7          | 1.045  | 5.191  | 2.887  | 0.010 | 0.081 | -2.856 |
| Vps13b        | -0.711 | 3.644  | -2.886 | 0.010 | 0.082 | -2.858 |
| Abhd14a       | -0.460 | 6.887  | -2.886 | 0.010 | 0.082 | -2.859 |
| 9430020K01Rik | -1.030 | 5.984  | -2.885 | 0.010 | 0.082 | -2.860 |
| Clybl         | -1.081 | 7.377  | -2.885 | 0.010 | 0.082 | -2.861 |
| Shfm1         | 0.490  | 9.403  | 2.885  | 0.010 | 0.082 | -2.861 |
| Parp16        | -0.612 | 5.219  | -2.884 | 0.010 | 0.082 | -2.863 |
| Mcm4          | 0.851  | 7.886  | 2.884  | 0.010 | 0.082 | -2.863 |
| Slc32a1       | -0.527 | 4.361  | -2.884 | 0.010 | 0.082 | -2.864 |
| Dmrt2         | -0.480 | 2.519  | -2.884 | 0.010 | 0.082 | -2.864 |
| Ror2          | 0.703  | 5.353  | 2.883  | 0.010 | 0.082 | -2.865 |
| Nacad         | -0.438 | 5.981  | -2.883 | 0.010 | 0.082 | -2.865 |
| LOC433197     | -0.393 | 2.923  | -2.883 | 0.010 | 0.082 | -2.865 |
| Thns12        | -1.037 | 6.426  | -2.883 | 0.010 | 0.082 | -2.865 |
| Ggnbp1        | -0.715 | 4.175  | -2.882 | 0.010 | 0.082 | -2.866 |
| Prrt1         | -0.434 | 6.736  | -2.882 | 0.010 | 0.082 | -2.866 |
| Crip3         | -0.357 | 3.235  | -2.881 | 0.010 | 0.082 | -2.868 |
| 2610027K06Rik | -0.470 | 3.016  | -2.881 | 0.010 | 0.082 | -2.868 |
| Impdh1        | -0.455 | 7.752  | -2.881 | 0.010 | 0.082 | -2.869 |
| 1700071A11Rik | -0.466 | 4.260  | -2.881 | 0.010 | 0.082 | -2.869 |
| Gpm6a         | -2.046 | 5.375  | -2.880 | 0.010 | 0.082 | -2.871 |
| Tmem161a      | -0.348 | 5.954  | -2.880 | 0.010 | 0.082 | -2.871 |
| Ngp           | -0.520 | 3.841  | -2.879 | 0.010 | 0.082 | -2.872 |
| Zfp704        | 0.580  | 6.290  | 2.879  | 0.010 | 0.082 | -2.872 |
| Trip11        | 0.771  | 6.422  | 2.879  | 0.010 | 0.082 | -2.873 |
| Gemin2        | 0.602  | 5.550  | 2.879  | 0.010 | 0.082 | -2.873 |
| Vmn1r15       | -0.403 | 2.471  | -2.878 | 0.010 | 0.082 | -2.874 |
| Myold         | 0.423  | 10.142 | 2.878  | 0.010 | 0.082 | -2.874 |
| Plat          | 2.001  | 7.175  | 2.878  | 0.010 | 0.082 | -2.875 |
| D6Ertd47e     | -0.652 | 4.059  | -2.878 | 0.010 | 0.082 | -2.875 |
| Fermt2        | -1.130 | 5.980  | -2.877 | 0.010 | 0.082 | -2.876 |
| Ns11          | -0.373 | 6.064  | -2.877 | 0.010 | 0.082 | -2.877 |
| 1810010H24Rik | -0.489 | 3.536  | -2.876 | 0.010 | 0.082 | -2.878 |
| 4930402K13Rik | -0.268 | 2.224  | -2.876 | 0.010 | 0.082 | -2.878 |
| Cldn22        | -0.530 | 5.217  | -2.876 | 0.010 | 0.082 | -2.878 |
| Dusp4         | 0.872  | 6.524  | 2.876  | 0.010 | 0.082 | -2.879 |
| Tbc1d19       | -0.769 | 6.306  | -2.876 | 0.010 | 0.082 | -2.879 |
| D4Ertd669e    | -0.409 | 3.438  | -2.875 | 0.010 | 0.082 | -2.880 |
| Eif2ak1       | -0.348 | 7.725  | -2.875 | 0.010 | 0.082 | -2.880 |
| Zfp593        | 0.652  | 7.191  | 2.875  | 0.010 | 0.082 | -2.880 |



|               |        |        |        |       |       |        |
|---------------|--------|--------|--------|-------|-------|--------|
| 2610034E01Rik | -0.444 | 3.929  | -2.875 | 0.010 | 0.082 | -2.881 |
| Nudt15        | -0.466 | 4.495  | -2.875 | 0.010 | 0.082 | -2.881 |
| Stim1         | -0.432 | 6.272  | -2.875 | 0.010 | 0.082 | -2.881 |
| Nipal         | -0.811 | 6.046  | -2.874 | 0.010 | 0.082 | -2.882 |
| Itgb3bp       | -0.391 | 2.907  | -2.874 | 0.010 | 0.082 | -2.882 |
| Fxyd6         | -1.698 | 5.643  | -2.874 | 0.010 | 0.082 | -2.882 |
| 6030442K20Rik | -0.486 | 2.738  | -2.874 | 0.010 | 0.082 | -2.882 |
| Gm16340       | -0.453 | 2.945  | -2.874 | 0.010 | 0.082 | -2.883 |
| I117re        | -0.692 | 8.917  | -2.873 | 0.010 | 0.082 | -2.884 |
| Psmas8        | -0.354 | 2.935  | -2.872 | 0.010 | 0.083 | -2.887 |
| Kcnk16        | -0.615 | 5.167  | -2.872 | 0.010 | 0.083 | -2.887 |
| 6030440G07Rik | -0.435 | 2.604  | -2.872 | 0.010 | 0.083 | -2.887 |
| Coq10b        | 0.557  | 7.983  | 2.872  | 0.010 | 0.083 | -2.887 |
| 2410087M07Rik | -0.350 | 3.743  | -2.871 | 0.010 | 0.083 | -2.887 |
| Rtel1         | -0.332 | 4.340  | -2.871 | 0.010 | 0.083 | -2.887 |
| Gtf2b         | -0.383 | 8.677  | -2.871 | 0.010 | 0.083 | -2.888 |
| Ass1          | -0.494 | 2.825  | -2.871 | 0.010 | 0.083 | -2.889 |
| Fbxw5         | -0.521 | 6.809  | -2.871 | 0.010 | 0.083 | -2.889 |
| Oxct1         | -1.273 | 10.332 | -2.869 | 0.011 | 0.083 | -2.893 |
| Ptk2b         | 0.373  | 7.565  | 2.868  | 0.011 | 0.083 | -2.893 |
| Gpank1        | -0.303 | 7.401  | -2.868 | 0.011 | 0.083 | -2.894 |
| Jmjd8         | -0.586 | 7.184  | -2.868 | 0.011 | 0.083 | -2.895 |
| Slc6a14       | 1.045  | 4.267  | 2.868  | 0.011 | 0.083 | -2.895 |
| Aldh6a1       | -1.462 | 9.058  | -2.868 | 0.011 | 0.083 | -2.895 |
| Cryz11        | -0.354 | 5.191  | -2.867 | 0.011 | 0.083 | -2.896 |
| Dkk2          | -0.444 | 2.485  | -2.867 | 0.011 | 0.083 | -2.897 |
| 4430402I18Rik | -0.540 | 3.309  | -2.866 | 0.011 | 0.083 | -2.897 |
| Srrm3         | -0.422 | 3.266  | -2.866 | 0.011 | 0.083 | -2.897 |
| Ndufa6        | -0.425 | 10.709 | -2.866 | 0.011 | 0.083 | -2.898 |
| Ly86          | 1.699  | 6.925  | 2.865  | 0.011 | 0.083 | -2.900 |
| St5           | -0.743 | 8.473  | -2.864 | 0.011 | 0.083 | -2.901 |
| Clstn1        | -0.531 | 7.150  | -2.864 | 0.011 | 0.083 | -2.902 |
| Eml6          | -0.512 | 3.772  | -2.864 | 0.011 | 0.083 | -2.902 |
| Nckap51       | -0.477 | 4.313  | -2.863 | 0.011 | 0.084 | -2.905 |
| Tmx3          | 0.508  | 7.565  | 2.862  | 0.011 | 0.084 | -2.905 |
| 1700003D09Rik | -0.331 | 3.580  | -2.862 | 0.011 | 0.084 | -2.906 |
| Smim8         | -0.523 | 7.699  | -2.862 | 0.011 | 0.084 | -2.906 |
| Larpl         | 0.357  | 9.968  | 2.862  | 0.011 | 0.084 | -2.906 |
| Tm9sf2        | 0.503  | 7.120  | 2.862  | 0.011 | 0.084 | -2.907 |
| Entpd4        | -0.467 | 3.586  | -2.861 | 0.011 | 0.084 | -2.908 |
| Glt28d2       | -0.863 | 5.839  | -2.860 | 0.011 | 0.084 | -2.909 |
| Ift122        | -0.945 | 5.215  | -2.860 | 0.011 | 0.084 | -2.911 |
| Fxyd5         | 1.077  | 6.647  | 2.859  | 0.011 | 0.084 | -2.911 |
| Mocs1         | 0.486  | 6.113  | 2.859  | 0.011 | 0.084 | -2.911 |
| 9030407C09Rik | -0.375 | 2.292  | -2.859 | 0.011 | 0.084 | -2.911 |
| Hoxb7         | -0.499 | 2.857  | -2.859 | 0.011 | 0.084 | -2.912 |
| C78339        | 0.344  | 9.437  | 2.858  | 0.011 | 0.084 | -2.913 |
| Cers1         | -0.473 | 3.935  | -2.858 | 0.011 | 0.084 | -2.913 |
| Rmdn1         | -0.521 | 7.225  | -2.858 | 0.011 | 0.084 | -2.913 |
| Tnfaip811     | 0.492  | 6.742  | 2.858  | 0.011 | 0.084 | -2.914 |

|               |        |        |        |       |       |        |
|---------------|--------|--------|--------|-------|-------|--------|
| Smim13        | -0.441 | 7.542  | -2.858 | 0.011 | 0.084 | -2.914 |
| Ifitm1        | 1.776  | 7.709  | 2.858  | 0.011 | 0.084 | -2.915 |
| Fgf15         | -0.386 | 3.357  | -2.857 | 0.011 | 0.084 | -2.915 |
| LOC102633691  | -0.413 | 3.844  | -2.857 | 0.011 | 0.084 | -2.915 |
| 4930456K20Rik | -0.517 | 4.591  | -2.857 | 0.011 | 0.084 | -2.916 |
| Slc25a5       | -0.302 | 12.719 | -2.857 | 0.011 | 0.084 | -2.916 |
| Psmbl0        | 2.151  | 9.909  | 2.856  | 0.011 | 0.084 | -2.917 |
| Bcl9l         | 0.568  | 7.234  | 2.856  | 0.011 | 0.084 | -2.917 |
| Pde3b         | -0.646 | 8.935  | -2.856 | 0.011 | 0.084 | -2.918 |
| Plk4          | 1.098  | 6.430  | 2.856  | 0.011 | 0.084 | -2.918 |
| Zrsr1         | -0.541 | 6.399  | -2.856 | 0.011 | 0.084 | -2.918 |
| Hspa5         | 0.697  | 12.209 | 2.855  | 0.011 | 0.084 | -2.919 |
| Fut2          | 0.656  | 8.501  | 2.855  | 0.011 | 0.084 | -2.919 |
| Zfp865        | -0.403 | 6.198  | -2.855 | 0.011 | 0.084 | -2.920 |
| D130037M23Rik | -0.429 | 4.558  | -2.854 | 0.011 | 0.084 | -2.921 |
| Serac1        | -0.519 | 3.584  | -2.853 | 0.011 | 0.084 | -2.923 |
| Fkbp4         | 0.644  | 5.289  | 2.853  | 0.011 | 0.084 | -2.924 |
| Prpsap1       | 0.466  | 9.707  | 2.852  | 0.011 | 0.084 | -2.925 |
| Zfp157        | -0.331 | 2.392  | -2.852 | 0.011 | 0.084 | -2.925 |
| Mif           | 0.432  | 10.475 | 2.852  | 0.011 | 0.084 | -2.925 |
| Ankrd13a      | -0.388 | 9.710  | -2.852 | 0.011 | 0.084 | -2.925 |
| Grm2          | -0.624 | 5.318  | -2.852 | 0.011 | 0.084 | -2.926 |
| Smek2         | 0.354  | 8.120  | 2.852  | 0.011 | 0.084 | -2.926 |
| Drd2          | -0.438 | 4.149  | -2.851 | 0.011 | 0.084 | -2.927 |
| Ccl20         | 0.753  | 6.216  | 2.851  | 0.011 | 0.084 | -2.927 |
| Pmvk          | 0.948  | 6.947  | 2.850  | 0.011 | 0.084 | -2.928 |
| Kank2         | -1.276 | 6.013  | -2.850 | 0.011 | 0.084 | -2.929 |
| Tmem591       | -0.443 | 5.152  | -2.850 | 0.011 | 0.085 | -2.930 |
| Rps25         | -0.588 | 7.195  | -2.850 | 0.011 | 0.085 | -2.930 |
| Tgm6          | -0.368 | 2.569  | -2.849 | 0.011 | 0.085 | -2.931 |
| BE949265      | -0.508 | 4.687  | -2.849 | 0.011 | 0.085 | -2.932 |
| Cecr6         | -0.466 | 5.398  | -2.848 | 0.011 | 0.085 | -2.933 |
| Clec12b       | -0.358 | 3.234  | -2.848 | 0.011 | 0.085 | -2.933 |
| Gn11          | 0.377  | 7.445  | 2.848  | 0.011 | 0.085 | -2.933 |
| Efcab10       | -0.390 | 2.567  | -2.848 | 0.011 | 0.085 | -2.933 |
| Ptpn21        | -0.363 | 7.550  | -2.848 | 0.011 | 0.085 | -2.934 |
| Jsrp1         | -0.454 | 5.531  | -2.847 | 0.011 | 0.085 | -2.935 |
| Slc7a12       | -0.327 | 2.941  | -2.847 | 0.011 | 0.085 | -2.936 |
| Robo3         | 0.396  | 3.574  | 2.846  | 0.011 | 0.085 | -2.937 |
| Mt1           | -0.800 | 11.975 | -2.846 | 0.011 | 0.085 | -2.937 |
| Wap           | -0.357 | 4.630  | -2.846 | 0.011 | 0.085 | -2.937 |
| Plscr3        | 0.455  | 6.022  | 2.846  | 0.011 | 0.085 | -2.937 |
| S100a9        | 1.974  | 5.225  | 2.846  | 0.011 | 0.085 | -2.938 |
| Snhg12        | 0.531  | 7.073  | 2.845  | 0.011 | 0.085 | -2.938 |
| Cggbp1        | 0.278  | 10.586 | 2.845  | 0.011 | 0.085 | -2.939 |
| Gm10710       | -0.446 | 3.170  | -2.845 | 0.011 | 0.085 | -2.940 |
| Rabgap1l      | -0.479 | 3.574  | -2.844 | 0.011 | 0.085 | -2.940 |
| Zfp868        | -0.556 | 5.438  | -2.844 | 0.011 | 0.085 | -2.940 |
| Mpp5          | -0.723 | 7.272  | -2.844 | 0.011 | 0.085 | -2.940 |
| 9030617003Rik | -0.700 | 7.117  | -2.844 | 0.011 | 0.085 | -2.940 |

|               |        |        |        |       |       |        |
|---------------|--------|--------|--------|-------|-------|--------|
| Lgmn          | 0.874  | 7.555  | 2.844  | 0.011 | 0.085 | -2.941 |
| Bre           | -0.461 | 8.295  | -2.844 | 0.011 | 0.085 | -2.941 |
| Vmnlr54       | -0.467 | 3.132  | -2.843 | 0.011 | 0.085 | -2.942 |
| 1700058M13Rik | -0.394 | 2.669  | -2.843 | 0.011 | 0.085 | -2.943 |
| Trib2         | -1.024 | 6.375  | -2.843 | 0.011 | 0.085 | -2.944 |
| Mrgprf        | -0.437 | 4.958  | -2.842 | 0.011 | 0.085 | -2.944 |
| Cela2a        | -0.830 | 4.409  | -2.842 | 0.011 | 0.085 | -2.945 |
| Rbm7          | 0.391  | 9.497  | 2.842  | 0.011 | 0.085 | -2.945 |
| Neto2         | -0.500 | 4.252  | -2.842 | 0.011 | 0.085 | -2.946 |
| Fam174a       | -0.563 | 8.607  | -2.842 | 0.011 | 0.085 | -2.946 |
| Clint1        | 0.419  | 10.881 | 2.841  | 0.011 | 0.085 | -2.948 |
| B3gnt1        | -0.374 | 7.049  | -2.841 | 0.011 | 0.085 | -2.948 |
| Sox12         | -0.400 | 4.169  | -2.840 | 0.011 | 0.085 | -2.948 |
| Rps19         | 0.524  | 12.125 | 2.840  | 0.011 | 0.085 | -2.949 |
| 4933427E11Rik | -0.316 | 2.572  | -2.840 | 0.011 | 0.085 | -2.950 |
| Clcn3         | -0.584 | 9.244  | -2.839 | 0.011 | 0.085 | -2.951 |
| Epn2          | 0.557  | 6.871  | 2.838  | 0.011 | 0.085 | -2.952 |
| Car5b         | -0.917 | 5.009  | -2.838 | 0.011 | 0.085 | -2.953 |
| 4933411013Rik | -0.276 | 2.266  | -2.838 | 0.011 | 0.085 | -2.953 |
| Lyar          | 0.819  | 7.640  | 2.837  | 0.011 | 0.085 | -2.954 |
| Mlx           | 0.443  | 8.374  | 2.837  | 0.011 | 0.086 | -2.955 |
| Wdr45         | -0.438 | 7.597  | -2.837 | 0.011 | 0.086 | -2.956 |
| Klrc2         | -0.318 | 2.474  | -2.835 | 0.011 | 0.086 | -2.959 |
| Heatr5a       | 0.335  | 9.188  | 2.834  | 0.011 | 0.086 | -2.960 |
| Insr          | -0.488 | 3.055  | -2.834 | 0.011 | 0.086 | -2.961 |
| Iqsec1        | -0.499 | 6.409  | -2.833 | 0.011 | 0.086 | -2.962 |
| 5330425B07Rik | -0.400 | 3.784  | -2.832 | 0.011 | 0.086 | -2.964 |
| Il17ra        | 0.531  | 5.431  | 2.831  | 0.011 | 0.086 | -2.967 |
| Edn1          | -0.881 | 5.829  | -2.831 | 0.011 | 0.086 | -2.967 |
| Btgl          | 0.517  | 10.991 | 2.830  | 0.011 | 0.086 | -2.968 |
| Ergic2        | 0.539  | 7.352  | 2.830  | 0.011 | 0.086 | -2.969 |
| Fam118a       | -0.803 | 6.024  | -2.830 | 0.011 | 0.086 | -2.969 |
| Fkrp          | -0.486 | 7.341  | -2.830 | 0.011 | 0.086 | -2.969 |
| Gm3362        | 0.310  | 12.775 | 2.829  | 0.011 | 0.087 | -2.970 |
| Gm4736        | -0.557 | 3.719  | -2.829 | 0.011 | 0.087 | -2.971 |
| Ddx60         | -1.351 | 4.756  | -2.829 | 0.011 | 0.087 | -2.971 |
| Galnt12       | 0.592  | 9.941  | 2.828  | 0.011 | 0.087 | -2.972 |
| Fam134b       | -1.703 | 9.611  | -2.827 | 0.011 | 0.087 | -2.974 |
| Tgfbr1        | -0.571 | 3.404  | -2.827 | 0.011 | 0.087 | -2.975 |
| Camk2a        | -0.461 | 4.283  | -2.827 | 0.011 | 0.087 | -2.975 |
| Tctex1d1      | -0.294 | 2.506  | -2.826 | 0.012 | 0.087 | -2.976 |
| Fgf16         | -0.394 | 2.849  | -2.825 | 0.012 | 0.087 | -2.977 |
| Chsyl         | 0.423  | 6.659  | 2.825  | 0.012 | 0.087 | -2.978 |
| Cox6c         | -0.303 | 12.177 | -2.825 | 0.012 | 0.087 | -2.978 |
| Tmem109       | 0.642  | 6.938  | 2.825  | 0.012 | 0.087 | -2.979 |
| Ficd          | -0.685 | 5.760  | -2.824 | 0.012 | 0.087 | -2.979 |
| Map4          | 0.341  | 7.097  | 2.823  | 0.012 | 0.087 | -2.982 |
| Dnlz          | -0.532 | 7.612  | -2.823 | 0.012 | 0.087 | -2.982 |
| AF366264      | -0.402 | 2.492  | -2.823 | 0.012 | 0.087 | -2.982 |
| Nhlrc2        | 0.701  | 7.340  | 2.821  | 0.012 | 0.087 | -2.985 |

|               |        |        |        |       |       |        |
|---------------|--------|--------|--------|-------|-------|--------|
| LOC102638970  | -0.573 | 3.686  | -2.821 | 0.012 | 0.087 | -2.986 |
| Neu3          | -0.334 | 4.382  | -2.821 | 0.012 | 0.087 | -2.986 |
| Chod1         | -0.462 | 3.223  | -2.821 | 0.012 | 0.087 | -2.986 |
| Slc39a6       | 0.749  | 6.711  | 2.821  | 0.012 | 0.087 | -2.986 |
| Cct811        | -0.398 | 3.710  | -2.821 | 0.012 | 0.088 | -2.987 |
| 2900055J20Rik | -0.517 | 3.244  | -2.820 | 0.012 | 0.088 | -2.988 |
| 9230112D13Rik | -0.470 | 3.404  | -2.820 | 0.012 | 0.088 | -2.988 |
| Atad5         | 0.606  | 5.850  | 2.820  | 0.012 | 0.088 | -2.988 |
| Pet112        | -0.744 | 6.219  | -2.820 | 0.012 | 0.088 | -2.988 |
| Slc2a3        | -0.505 | 2.992  | -2.819 | 0.012 | 0.088 | -2.989 |
| D5Ert525e     | -0.419 | 2.834  | -2.819 | 0.012 | 0.088 | -2.990 |
| Clic1         | 0.628  | 11.130 | 2.819  | 0.012 | 0.088 | -2.990 |
| Klk1b27       | -0.474 | 2.966  | -2.818 | 0.012 | 0.088 | -2.991 |
| Ehbp111       | 0.532  | 5.511  | 2.818  | 0.012 | 0.088 | -2.991 |
| Tns1          | -1.411 | 8.064  | -2.818 | 0.012 | 0.088 | -2.991 |
| Fut10         | -0.471 | 3.694  | -2.818 | 0.012 | 0.088 | -2.992 |
| Akr1c21       | -0.526 | 4.255  | -2.818 | 0.012 | 0.088 | -2.992 |
| Creb3         | 0.547  | 9.236  | 2.818  | 0.012 | 0.088 | -2.992 |
| Ubqln4        | 0.459  | 8.307  | 2.817  | 0.012 | 0.088 | -2.993 |
| Fundc1        | -0.663 | 8.028  | -2.817 | 0.012 | 0.088 | -2.994 |
| Nufip2        | 0.586  | 7.003  | 2.816  | 0.012 | 0.088 | -2.995 |
| Dlx3          | -0.515 | 4.439  | -2.816 | 0.012 | 0.088 | -2.995 |
| Tmem230       | -0.573 | 8.993  | -2.816 | 0.012 | 0.088 | -2.995 |
| Fam167b       | -0.436 | 4.103  | -2.816 | 0.012 | 0.088 | -2.996 |
| 5730522E02Rik | -0.406 | 3.967  | -2.816 | 0.012 | 0.088 | -2.996 |
| Hao2          | -0.367 | 2.390  | -2.816 | 0.012 | 0.088 | -2.997 |
| Btbd11        | 0.536  | 3.817  | 2.815  | 0.012 | 0.088 | -2.997 |
| Dld           | -0.556 | 8.652  | -2.815 | 0.012 | 0.088 | -2.997 |
| Scx           | -0.475 | 3.138  | -2.814 | 0.012 | 0.088 | -2.999 |
| Stk3          | 0.421  | 7.069  | 2.814  | 0.012 | 0.088 | -2.999 |
| Ccdc108       | -0.481 | 4.024  | -2.814 | 0.012 | 0.088 | -3.000 |
| Gpr1          | -0.360 | 3.755  | -2.814 | 0.012 | 0.088 | -3.000 |
| 6330582A15Rik | -0.497 | 3.237  | -2.813 | 0.012 | 0.088 | -3.001 |
| A430005L14Rik | 0.528  | 8.024  | 2.813  | 0.012 | 0.088 | -3.001 |
| Timp3         | -0.593 | 3.515  | -2.813 | 0.012 | 0.088 | -3.002 |
| Tlr2          | 1.577  | 6.724  | 2.812  | 0.012 | 0.088 | -3.003 |
| Mfsd4         | -1.121 | 10.211 | -2.812 | 0.012 | 0.088 | -3.003 |
| D5Ert615e     | -0.340 | 3.223  | -2.812 | 0.012 | 0.088 | -3.004 |
| 5330411J11Rik | -0.435 | 3.140  | -2.812 | 0.012 | 0.088 | -3.004 |
| Cdhr2         | 1.529  | 6.735  | 2.812  | 0.012 | 0.088 | -3.004 |
| Coa6          | 0.718  | 6.437  | 2.812  | 0.012 | 0.088 | -3.004 |
| Fam103a1      | -0.317 | 9.508  | -2.811 | 0.012 | 0.088 | -3.005 |
| Prss58        | -0.452 | 2.447  | -2.811 | 0.012 | 0.088 | -3.005 |
| LOC102634683  | -0.477 | 3.551  | -2.810 | 0.012 | 0.088 | -3.007 |
| Rpp25         | -1.295 | 6.743  | -2.810 | 0.012 | 0.088 | -3.008 |
| Khdc1b        | -0.329 | 2.686  | -2.810 | 0.012 | 0.088 | -3.008 |
| Khdc1a        | 3.586  | 6.348  | 2.809  | 0.012 | 0.088 | -3.009 |
| Gm4951        | 3.300  | 6.604  | 2.809  | 0.012 | 0.088 | -3.009 |
| Slc16a7       | -1.943 | 7.326  | -2.809 | 0.012 | 0.088 | -3.010 |
| Tsc22d3       | -0.798 | 7.791  | -2.808 | 0.012 | 0.088 | -3.011 |

|               |        |        |        |       |       |        |
|---------------|--------|--------|--------|-------|-------|--------|
| Tmem72        | -0.333 | 3.925  | -2.808 | 0.012 | 0.088 | -3.012 |
| Dcxr          | 0.612  | 9.122  | 2.807  | 0.012 | 0.089 | -3.013 |
| Gpatch8       | -0.406 | 5.669  | -2.807 | 0.012 | 0.089 | -3.014 |
| Fgd1          | -0.501 | 5.247  | -2.807 | 0.012 | 0.089 | -3.014 |
| Slc24a4       | -0.534 | 4.494  | -2.806 | 0.012 | 0.089 | -3.015 |
| Donson        | 0.549  | 6.460  | 2.806  | 0.012 | 0.089 | -3.015 |
| Fam221b       | -0.423 | 3.100  | -2.806 | 0.012 | 0.089 | -3.015 |
| Zfp94         | -0.420 | 3.684  | -2.806 | 0.012 | 0.089 | -3.015 |
| Chrne         | -0.554 | 4.278  | -2.806 | 0.012 | 0.089 | -3.015 |
| Dtymk         | 0.555  | 8.558  | 2.806  | 0.012 | 0.089 | -3.016 |
| 1700051A21Rik | -0.442 | 3.153  | -2.805 | 0.012 | 0.089 | -3.016 |
| Epha2         | 0.886  | 7.877  | 2.805  | 0.012 | 0.089 | -3.017 |
| Pou6f1        | -0.422 | 2.817  | -2.805 | 0.012 | 0.089 | -3.017 |
| Bglap         | -1.119 | 8.682  | -2.804 | 0.012 | 0.089 | -3.019 |
| Atp11c        | -0.931 | 3.243  | -2.804 | 0.012 | 0.089 | -3.020 |
| Tbc1d9b       | -0.319 | 8.133  | -2.803 | 0.012 | 0.089 | -3.020 |
| Myo15         | -0.443 | 4.816  | -2.803 | 0.012 | 0.089 | -3.021 |
| Mospd3        | -0.351 | 5.359  | -2.803 | 0.012 | 0.089 | -3.021 |
| 1700016H13Rik | -0.412 | 2.681  | -2.802 | 0.012 | 0.089 | -3.023 |
| Pxdn          | 0.770  | 5.503  | 2.802  | 0.012 | 0.089 | -3.024 |
| Kif1a         | -0.667 | 4.671  | -2.802 | 0.012 | 0.089 | -3.024 |
| Megf9         | -1.536 | 6.091  | -2.802 | 0.012 | 0.089 | -3.024 |
| Ccdc13        | -0.353 | 5.653  | -2.802 | 0.012 | 0.089 | -3.024 |
| Slc35f3       | -0.524 | 3.055  | -2.801 | 0.012 | 0.089 | -3.024 |
| Cox7a2        | -0.308 | 12.947 | -2.801 | 0.012 | 0.089 | -3.025 |
| 1700093J21Rik | -0.558 | 4.804  | -2.800 | 0.012 | 0.089 | -3.026 |
| Dnajb5        | -0.403 | 4.870  | -2.800 | 0.012 | 0.089 | -3.027 |
| Efnb3         | -0.369 | 4.037  | -2.800 | 0.012 | 0.089 | -3.027 |
| Ubd           | 4.770  | 8.359  | 2.800  | 0.012 | 0.089 | -3.027 |
| Zfyve1        | -0.493 | 4.536  | -2.800 | 0.012 | 0.089 | -3.027 |
| Slc6a2        | -0.343 | 3.610  | -2.799 | 0.012 | 0.089 | -3.028 |
| Atxn10        | -0.478 | 8.408  | -2.799 | 0.012 | 0.089 | -3.028 |
| H2-DMa        | 3.727  | 8.465  | 2.799  | 0.012 | 0.089 | -3.028 |
| LOC675947     | -0.450 | 4.595  | -2.799 | 0.012 | 0.089 | -3.029 |
| B430105A11Rik | -0.385 | 2.670  | -2.799 | 0.012 | 0.089 | -3.029 |
| LOC102634000  | -0.459 | 3.748  | -2.798 | 0.012 | 0.089 | -3.031 |
| Rrh           | -0.446 | 3.256  | -2.798 | 0.012 | 0.089 | -3.031 |
| Tex264        | -0.369 | 8.002  | -2.798 | 0.012 | 0.089 | -3.032 |
| Cyp2j9        | -0.488 | 3.748  | -2.798 | 0.012 | 0.089 | -3.032 |
| Nol10         | 0.646  | 4.489  | 2.797  | 0.012 | 0.089 | -3.032 |
| Sapcd1        | -0.350 | 4.389  | -2.797 | 0.012 | 0.089 | -3.033 |
| Pclo          | -0.777 | 4.378  | -2.797 | 0.012 | 0.089 | -3.033 |
| Ccr111        | -0.541 | 3.267  | -2.796 | 0.012 | 0.089 | -3.034 |
| 2900017F05Rik | -0.315 | 2.816  | -2.796 | 0.012 | 0.089 | -3.034 |
| F8            | -0.440 | 3.521  | -2.796 | 0.012 | 0.089 | -3.034 |
| 1700052M09Rik | -0.465 | 6.400  | -2.796 | 0.012 | 0.089 | -3.035 |
| LOC102642137  | 0.391  | 10.640 | 2.795  | 0.012 | 0.089 | -3.036 |
| Ppp1r3c       | -0.682 | 4.183  | -2.795 | 0.012 | 0.089 | -3.036 |
| Eepd1         | -0.708 | 6.377  | -2.795 | 0.012 | 0.089 | -3.036 |
| 4932430A15Rik | -0.494 | 3.451  | -2.795 | 0.012 | 0.089 | -3.037 |

|               |        |        |        |       |       |        |
|---------------|--------|--------|--------|-------|-------|--------|
| D1Ertd704e    | -0.413 | 3.020  | -2.795 | 0.012 | 0.089 | -3.037 |
| Gm8069        | 0.434  | 10.244 | 2.795  | 0.012 | 0.089 | -3.037 |
| Gdf11         | -0.428 | 4.797  | -2.794 | 0.012 | 0.089 | -3.038 |
| Tcte2         | -0.424 | 2.966  | -2.794 | 0.012 | 0.089 | -3.038 |
| D15Ertd154e   | -0.377 | 2.925  | -2.794 | 0.012 | 0.089 | -3.038 |
| Arhgdig       | -1.331 | 9.271  | -2.794 | 0.012 | 0.089 | -3.038 |
| Dynlrb1       | -0.499 | 9.544  | -2.794 | 0.012 | 0.089 | -3.039 |
| Tars2         | 0.409  | 7.244  | 2.793  | 0.012 | 0.090 | -3.040 |
| Lrp2          | -0.420 | 2.686  | -2.793 | 0.012 | 0.090 | -3.040 |
| Rmnd5a        | -0.496 | 8.682  | -2.793 | 0.012 | 0.090 | -3.041 |
| Arhgef18      | -0.424 | 8.236  | -2.792 | 0.012 | 0.090 | -3.043 |
| Slc35f5       | -0.355 | 9.261  | -2.792 | 0.012 | 0.090 | -3.043 |
| 1700027J07Rik | -0.398 | 3.699  | -2.792 | 0.012 | 0.090 | -3.043 |
| Tlr5          | -0.452 | 4.575  | -2.791 | 0.012 | 0.090 | -3.045 |
| Hsfy2         | -0.363 | 3.012  | -2.790 | 0.012 | 0.090 | -3.046 |
| Ppplr37       | 0.560  | 7.730  | 2.790  | 0.012 | 0.090 | -3.046 |
| Zfyve9        | -0.659 | 6.124  | -2.790 | 0.012 | 0.090 | -3.046 |
| Unc13a        | -0.427 | 3.425  | -2.789 | 0.012 | 0.090 | -3.049 |
| Fam117a       | -1.222 | 7.443  | -2.789 | 0.012 | 0.090 | -3.049 |
| Top1          | 0.476  | 9.790  | 2.789  | 0.012 | 0.090 | -3.049 |
| Grhl3         | 1.068  | 3.962  | 2.788  | 0.012 | 0.090 | -3.050 |
| Reep1         | -0.435 | 3.012  | -2.788 | 0.012 | 0.090 | -3.050 |
| 4933436I01Rik | -0.355 | 2.571  | -2.788 | 0.012 | 0.090 | -3.051 |
| Pdia2         | -3.246 | 9.764  | -2.787 | 0.012 | 0.090 | -3.051 |
| Hs3st3b1      | -0.844 | 5.778  | -2.787 | 0.012 | 0.090 | -3.051 |
| Maff          | 0.857  | 6.112  | 2.787  | 0.012 | 0.090 | -3.051 |
| 2810408A11Rik | -0.492 | 3.839  | -2.787 | 0.012 | 0.090 | -3.051 |
| Myl3          | -0.525 | 2.811  | -2.787 | 0.012 | 0.090 | -3.051 |
| AI662168      | -0.443 | 3.496  | -2.786 | 0.013 | 0.090 | -3.053 |
| Mvp           | 0.860  | 8.420  | 2.786  | 0.013 | 0.090 | -3.054 |
| Nek6          | 0.531  | 7.994  | 2.786  | 0.013 | 0.090 | -3.054 |
| Ccdc63        | -0.419 | 3.830  | -2.785 | 0.013 | 0.090 | -3.057 |
| Tubb1         | -0.356 | 4.285  | -2.784 | 0.013 | 0.091 | -3.058 |
| Parp3         | 1.322  | 5.961  | 2.784  | 0.013 | 0.091 | -3.058 |
| 2010002M09Rik | -0.529 | 3.702  | -2.784 | 0.013 | 0.091 | -3.058 |
| BC024137      | -0.785 | 4.746  | -2.784 | 0.013 | 0.091 | -3.059 |
| Arhgap23      | -0.457 | 6.008  | -2.783 | 0.013 | 0.091 | -3.059 |
| Suclg1        | -0.279 | 10.497 | -2.783 | 0.013 | 0.091 | -3.059 |
| Nap115        | -0.352 | 3.195  | -2.783 | 0.013 | 0.091 | -3.060 |
| 1700028I16Rik | -0.343 | 3.486  | -2.783 | 0.013 | 0.091 | -3.061 |
| E330021D16Rik | -0.547 | 2.873  | -2.782 | 0.013 | 0.091 | -3.061 |
| Gm12429       | -0.407 | 4.932  | -2.782 | 0.013 | 0.091 | -3.062 |
| Thbs4         | -0.444 | 3.817  | -2.781 | 0.013 | 0.091 | -3.064 |
| Spata16       | -0.358 | 3.549  | -2.780 | 0.013 | 0.091 | -3.065 |
| LOC102640815  | -0.379 | 4.655  | -2.780 | 0.013 | 0.091 | -3.065 |
| Elov11        | -0.409 | 9.592  | -2.779 | 0.013 | 0.091 | -3.067 |
| Egr1          | 1.849  | 9.763  | 2.779  | 0.013 | 0.091 | -3.067 |
| 4933429H19Rik | -0.419 | 2.751  | -2.779 | 0.013 | 0.091 | -3.068 |
| Slc6a12       | -0.413 | 3.377  | -2.779 | 0.013 | 0.091 | -3.068 |
| Crlf2         | 0.921  | 6.160  | 2.779  | 0.013 | 0.091 | -3.068 |

|               |        |       |        |       |       |        |
|---------------|--------|-------|--------|-------|-------|--------|
| Hlfnt         | -0.463 | 4.446 | -2.778 | 0.013 | 0.091 | -3.070 |
| 4930579K19Rik | -0.325 | 2.518 | -2.777 | 0.013 | 0.091 | -3.071 |
| Ireb2         | 0.360  | 7.524 | 2.777  | 0.013 | 0.091 | -3.071 |
| Kcnh3         | -0.354 | 7.067 | -2.776 | 0.013 | 0.091 | -3.072 |
| I11r1         | 0.481  | 7.089 | 2.776  | 0.013 | 0.091 | -3.073 |
| Fam101a       | -1.171 | 8.104 | -2.776 | 0.013 | 0.091 | -3.073 |
| Ntsr1         | -0.417 | 3.766 | -2.776 | 0.013 | 0.091 | -3.073 |
| Rph3a1        | -0.498 | 4.551 | -2.776 | 0.013 | 0.091 | -3.074 |
| Lat           | 1.031  | 6.225 | 2.775  | 0.013 | 0.091 | -3.075 |
| Aoc1          | -0.365 | 5.405 | -2.775 | 0.013 | 0.091 | -3.075 |
| Pr17d1        | -0.382 | 2.690 | -2.775 | 0.013 | 0.091 | -3.076 |
| Aass          | -1.789 | 6.437 | -2.775 | 0.013 | 0.091 | -3.076 |
| Zfand5        | 0.431  | 9.369 | 2.775  | 0.013 | 0.091 | -3.076 |
| 2810049E08Rik | -0.323 | 2.458 | -2.774 | 0.013 | 0.091 | -3.077 |
| Slc25a13      | -0.656 | 7.741 | -2.774 | 0.013 | 0.091 | -3.077 |
| Tuba3a        | 0.416  | 6.553 | 2.774  | 0.013 | 0.091 | -3.077 |
| Epstil        | -0.374 | 5.425 | -2.774 | 0.013 | 0.091 | -3.078 |
| 5330439B14Rik | -0.370 | 2.785 | -2.773 | 0.013 | 0.092 | -3.079 |
| Slc35e2       | 0.447  | 7.527 | 2.773  | 0.013 | 0.092 | -3.079 |
| Slc4a10       | -0.395 | 2.602 | -2.773 | 0.013 | 0.092 | -3.080 |
| Fam219aos     | -0.343 | 4.649 | -2.773 | 0.013 | 0.092 | -3.080 |
| Gm10199       | -0.424 | 4.305 | -2.772 | 0.013 | 0.092 | -3.080 |
| 4933412E12Rik | -0.313 | 3.329 | -2.772 | 0.013 | 0.092 | -3.081 |
| C87436        | -0.536 | 5.280 | -2.772 | 0.013 | 0.092 | -3.081 |
| 4930444K16Rik | -0.346 | 2.655 | -2.772 | 0.013 | 0.092 | -3.081 |
| Aim1          | 0.635  | 7.231 | 2.771  | 0.013 | 0.092 | -3.082 |
| Atp5s1        | -0.388 | 6.919 | -2.771 | 0.013 | 0.092 | -3.083 |
| Rsph4a        | -0.283 | 2.489 | -2.770 | 0.013 | 0.092 | -3.084 |
| 1700016D18Rik | -0.420 | 5.462 | -2.770 | 0.013 | 0.092 | -3.084 |
| 1700001K19Rik | -0.409 | 3.758 | -2.770 | 0.013 | 0.092 | -3.085 |
| Ofd1          | 0.609  | 4.830 | 2.770  | 0.013 | 0.092 | -3.085 |
| Tro           | -0.514 | 4.009 | -2.770 | 0.013 | 0.092 | -3.085 |
| Wbp1          | -0.324 | 8.466 | -2.769 | 0.013 | 0.092 | -3.086 |
| Gm4070        | 3.225  | 7.268 | 2.769  | 0.013 | 0.092 | -3.087 |
| Cd3001f       | 1.108  | 5.385 | 2.769  | 0.013 | 0.092 | -3.087 |
| Mboat7        | -0.515 | 5.864 | -2.769 | 0.013 | 0.092 | -3.087 |
| Klhdc8a       | -0.650 | 5.150 | -2.769 | 0.013 | 0.092 | -3.088 |
| Abca8b        | -0.525 | 3.626 | -2.768 | 0.013 | 0.092 | -3.088 |
| 4931406B18Rik | -0.460 | 3.828 | -2.768 | 0.013 | 0.092 | -3.089 |
| Mzfl          | -0.492 | 4.255 | -2.768 | 0.013 | 0.092 | -3.089 |
| Trim15        | 2.483  | 6.334 | 2.768  | 0.013 | 0.092 | -3.090 |
| Anapc13       | -0.552 | 9.634 | -2.766 | 0.013 | 0.092 | -3.092 |
| Elavl4        | -0.408 | 3.574 | -2.766 | 0.013 | 0.092 | -3.093 |
| 1700009P17Rik | -0.338 | 5.766 | -2.766 | 0.013 | 0.092 | -3.093 |
| Tmem134       | -0.340 | 6.463 | -2.766 | 0.013 | 0.092 | -3.094 |
| Usp2          | -1.300 | 5.312 | -2.765 | 0.013 | 0.092 | -3.095 |
| Slc12a7       | -0.503 | 9.607 | -2.765 | 0.013 | 0.092 | -3.095 |
| Cnst          | -0.446 | 7.672 | -2.765 | 0.013 | 0.092 | -3.096 |
| D14Ertd426e   | -0.444 | 3.846 | -2.765 | 0.013 | 0.092 | -3.096 |
| Tcirgl        | 0.736  | 7.917 | 2.764  | 0.013 | 0.092 | -3.096 |

|               |        |        |        |       |       |        |
|---------------|--------|--------|--------|-------|-------|--------|
| Rps3a1        | 0.319  | 12.978 | 2.764  | 0.013 | 0.092 | -3.096 |
| Pias4         | 0.440  | 8.384  | 2.764  | 0.013 | 0.092 | -3.097 |
| Kif16b        | -0.569 | 5.401  | -2.764 | 0.013 | 0.092 | -3.097 |
| Serp2         | -0.432 | 3.869  | -2.764 | 0.013 | 0.092 | -3.097 |
| 5930436019Rik | 1.763  | 5.581  | 2.763  | 0.013 | 0.092 | -3.098 |
| Gadd45a       | 0.694  | 6.083  | 2.763  | 0.013 | 0.092 | -3.098 |
| Ptgdr2        | -0.301 | 4.351  | -2.763 | 0.013 | 0.092 | -3.099 |
| Tcf7l1        | -0.463 | 6.136  | -2.763 | 0.013 | 0.092 | -3.099 |
| Pprc1         | 0.685  | 7.543  | 2.762  | 0.013 | 0.092 | -3.100 |
| A930037016Rik | -0.349 | 2.775  | -2.762 | 0.013 | 0.093 | -3.100 |
| Amy1          | -1.882 | 4.349  | -2.762 | 0.013 | 0.093 | -3.101 |
| Myrip         | -0.938 | 4.834  | -2.761 | 0.013 | 0.093 | -3.102 |
| Mlana         | -0.521 | 3.204  | -2.760 | 0.013 | 0.093 | -3.104 |
| Adra1b        | -0.456 | 3.875  | -2.760 | 0.013 | 0.093 | -3.104 |
| 4930519H02Rik | -0.393 | 3.766  | -2.760 | 0.013 | 0.093 | -3.105 |
| Dntt          | -0.367 | 2.624  | -2.759 | 0.013 | 0.093 | -3.105 |
| Farp2         | -0.413 | 4.855  | -2.759 | 0.013 | 0.093 | -3.106 |
| Fam131a       | -0.387 | 3.566  | -2.759 | 0.013 | 0.093 | -3.107 |
| 2700068H02Rik | -0.366 | 2.812  | -2.758 | 0.013 | 0.093 | -3.109 |
| Acrv1         | -0.438 | 3.155  | -2.758 | 0.013 | 0.093 | -3.109 |
| Rblcc1        | -0.348 | 7.209  | -2.757 | 0.013 | 0.093 | -3.110 |
| Stc1          | -0.346 | 3.601  | -2.757 | 0.013 | 0.093 | -3.111 |
| Pr17a1        | -0.349 | 2.182  | -2.756 | 0.013 | 0.093 | -3.112 |
| Mybpc2        | -0.422 | 3.375  | -2.756 | 0.013 | 0.093 | -3.112 |
| Toporsos      | -0.513 | 7.208  | -2.755 | 0.013 | 0.093 | -3.113 |
| Cdkn1c        | -1.314 | 7.080  | -2.755 | 0.013 | 0.093 | -3.114 |
| Asb13         | -0.819 | 6.214  | -2.754 | 0.013 | 0.093 | -3.115 |
| Pdha1         | -0.338 | 10.908 | -2.754 | 0.013 | 0.093 | -3.115 |
| Prkd1         | -0.494 | 4.667  | -2.754 | 0.013 | 0.094 | -3.116 |
| Slc39a5       | -0.497 | 4.432  | -2.754 | 0.013 | 0.094 | -3.116 |
| Cd47          | 0.608  | 9.360  | 2.754  | 0.013 | 0.094 | -3.117 |
| Mycbp         | -0.275 | 2.339  | -2.753 | 0.013 | 0.094 | -3.118 |
| Mpeg1         | 2.038  | 7.795  | 2.753  | 0.013 | 0.094 | -3.118 |
| Ankrd52       | -0.510 | 2.913  | -2.753 | 0.013 | 0.094 | -3.119 |
| Fstl5         | -0.433 | 3.940  | -2.752 | 0.013 | 0.094 | -3.119 |
| Pcnx14        | -0.426 | 4.146  | -2.752 | 0.013 | 0.094 | -3.120 |
| Rsrc2         | 1.383  | 6.509  | 2.752  | 0.013 | 0.094 | -3.120 |
| Gtf2h4        | 0.729  | 5.799  | 2.751  | 0.013 | 0.094 | -3.122 |
| Ttll1         | -0.596 | 5.192  | -2.750 | 0.014 | 0.094 | -3.123 |
| Rpap1         | 0.406  | 6.336  | 2.750  | 0.014 | 0.094 | -3.124 |
| LOC102635638  | 1.813  | 7.592  | 2.750  | 0.014 | 0.094 | -3.124 |
| Cpsf4         | 0.278  | 7.304  | 2.749  | 0.014 | 0.094 | -3.125 |
| Upf1          | 0.471  | 6.622  | 2.749  | 0.014 | 0.094 | -3.125 |
| Ccdc43        | 0.365  | 6.807  | 2.749  | 0.014 | 0.094 | -3.126 |
| 1700034I23Rik | -0.357 | 2.679  | -2.749 | 0.014 | 0.094 | -3.127 |
| Stk36         | -0.367 | 3.692  | -2.748 | 0.014 | 0.094 | -3.127 |
| Mt2           | -0.755 | 11.690 | -2.748 | 0.014 | 0.094 | -3.127 |
| Tpgs2         | -0.763 | 5.441  | -2.748 | 0.014 | 0.094 | -3.128 |
| Scn9a         | -0.454 | 2.591  | -2.748 | 0.014 | 0.094 | -3.128 |
| Tesc          | -0.616 | 9.232  | -2.747 | 0.014 | 0.094 | -3.130 |



|               |        |        |        |       |       |        |
|---------------|--------|--------|--------|-------|-------|--------|
| Lsamp         | -0.444 | 3.779  | -2.747 | 0.014 | 0.094 | -3.130 |
| Hiplr         | -0.458 | 7.079  | -2.746 | 0.014 | 0.094 | -3.131 |
| Rgma          | -0.493 | 4.084  | -2.746 | 0.014 | 0.094 | -3.131 |
| Arll4         | 0.546  | 9.601  | 2.746  | 0.014 | 0.094 | -3.131 |
| Zbtb7a        | -0.368 | 4.976  | -2.746 | 0.014 | 0.094 | -3.131 |
| AI414108      | -0.385 | 5.700  | -2.745 | 0.014 | 0.094 | -3.133 |
| 4933407C09Rik | -0.422 | 4.737  | -2.745 | 0.014 | 0.094 | -3.133 |
| Repin1        | -0.315 | 3.693  | -2.745 | 0.014 | 0.094 | -3.133 |
| Phyhip1       | -0.522 | 4.374  | -2.745 | 0.014 | 0.094 | -3.133 |
| Anpep         | -0.891 | 8.168  | -2.744 | 0.014 | 0.095 | -3.135 |
| Xk            | -0.509 | 4.016  | -2.744 | 0.014 | 0.095 | -3.136 |
| 2900056L01Rik | -0.427 | 5.098  | -2.743 | 0.014 | 0.095 | -3.136 |
| Ifitm6        | -0.429 | 4.301  | -2.743 | 0.014 | 0.095 | -3.137 |
| H2-Q7         | 4.431  | 9.177  | 2.743  | 0.014 | 0.095 | -3.137 |
| Ntsr2         | -0.401 | 3.476  | -2.743 | 0.014 | 0.095 | -3.137 |
| Clcn2         | 1.286  | 7.452  | 2.743  | 0.014 | 0.095 | -3.138 |
| Nicn1         | -0.886 | 5.820  | -2.742 | 0.014 | 0.095 | -3.139 |
| Kif6          | -0.442 | 3.544  | -2.742 | 0.014 | 0.095 | -3.139 |
| Ldhc          | -0.398 | 2.664  | -2.741 | 0.014 | 0.095 | -3.140 |
| Rabep1        | -0.449 | 5.771  | -2.741 | 0.014 | 0.095 | -3.141 |
| Ncbp1         | 0.369  | 9.309  | 2.741  | 0.014 | 0.095 | -3.141 |
| Camsap1       | 0.391  | 5.460  | 2.741  | 0.014 | 0.095 | -3.141 |
| Arid1a        | 0.705  | 8.597  | 2.741  | 0.014 | 0.095 | -3.141 |
| Klra20        | -0.306 | 2.351  | -2.741 | 0.014 | 0.095 | -3.141 |
| Krtap5-3      | -0.357 | 3.099  | -2.741 | 0.014 | 0.095 | -3.142 |
| Sntal         | -0.879 | 6.278  | -2.741 | 0.014 | 0.095 | -3.142 |
| Rpgr          | 0.458  | 4.357  | 2.740  | 0.014 | 0.095 | -3.143 |
| 1110019B22Rik | -0.480 | 4.158  | -2.739 | 0.014 | 0.095 | -3.144 |
| Prfl          | -0.400 | 3.240  | -2.739 | 0.014 | 0.095 | -3.144 |
| Luc712        | 0.567  | 8.581  | 2.739  | 0.014 | 0.095 | -3.145 |
| 2900046B09Rik | -0.483 | 4.839  | -2.739 | 0.014 | 0.095 | -3.145 |
| 4922502N22Rik | -0.354 | 3.071  | -2.739 | 0.014 | 0.095 | -3.145 |
| Ppip5k2       | 0.365  | 7.367  | 2.738  | 0.014 | 0.095 | -3.147 |
| Rptoros       | -0.448 | 4.330  | -2.738 | 0.014 | 0.095 | -3.147 |
| Asb17         | -0.454 | 2.572  | -2.738 | 0.014 | 0.095 | -3.147 |
| A230009B12Rik | -0.352 | 3.166  | -2.738 | 0.014 | 0.095 | -3.148 |
| Aph1b         | -0.777 | 6.141  | -2.738 | 0.014 | 0.095 | -3.148 |
| Sox4          | 0.697  | 7.882  | 2.737  | 0.014 | 0.095 | -3.148 |
| Tnrc6b        | -0.653 | 8.074  | -2.737 | 0.014 | 0.095 | -3.149 |
| Nupr11        | -0.446 | 3.937  | -2.737 | 0.014 | 0.095 | -3.149 |
| Irf8          | 2.056  | 7.475  | 2.737  | 0.014 | 0.095 | -3.150 |
| Fh1           | -0.478 | 10.668 | -2.737 | 0.014 | 0.095 | -3.150 |
| 4833419G08Rik | -0.465 | 3.599  | -2.736 | 0.014 | 0.095 | -3.150 |
| Scg3          | -0.637 | 5.701  | -2.736 | 0.014 | 0.095 | -3.150 |
| Cxcl15        | 2.117  | 5.997  | 2.736  | 0.014 | 0.095 | -3.151 |
| Dner          | -0.436 | 3.642  | -2.736 | 0.014 | 0.095 | -3.151 |
| Gm5930        | -0.488 | 2.342  | -2.736 | 0.014 | 0.095 | -3.151 |
| Pax6os1       | -0.364 | 2.879  | -2.736 | 0.014 | 0.095 | -3.152 |
| Ccdc7         | -0.359 | 2.283  | -2.736 | 0.014 | 0.095 | -3.152 |
| Gpr19         | -0.457 | 5.660  | -2.735 | 0.014 | 0.095 | -3.153 |

|               |        |       |        |       |       |        |
|---------------|--------|-------|--------|-------|-------|--------|
| Pramell       | -0.532 | 3.577 | -2.735 | 0.014 | 0.095 | -3.153 |
| Pdpx          | -0.445 | 5.293 | -2.735 | 0.014 | 0.095 | -3.153 |
| Pde6d         | -0.625 | 6.482 | -2.734 | 0.014 | 0.095 | -3.154 |
| Slain1        | -0.400 | 5.023 | -2.734 | 0.014 | 0.095 | -3.155 |
| Sash3         | 0.782  | 6.159 | 2.734  | 0.014 | 0.095 | -3.155 |
| A630014C17Rik | -0.350 | 3.168 | -2.733 | 0.014 | 0.095 | -3.156 |
| AI413759      | -0.453 | 5.072 | -2.733 | 0.014 | 0.095 | -3.156 |
| Lama4         | -0.592 | 5.111 | -2.733 | 0.014 | 0.095 | -3.157 |
| Eng           | -0.436 | 6.428 | -2.733 | 0.014 | 0.095 | -3.157 |
| Mett114       | 0.443  | 6.249 | 2.732  | 0.014 | 0.095 | -3.159 |
| Ap1b1         | 0.324  | 8.711 | 2.732  | 0.014 | 0.095 | -3.159 |
| Coq10a        | -0.454 | 6.559 | -2.732 | 0.014 | 0.095 | -3.159 |
| D130020L05Rik | -0.444 | 6.092 | -2.732 | 0.014 | 0.095 | -3.159 |
| 4933407L21Rik | -0.396 | 3.346 | -2.731 | 0.014 | 0.096 | -3.161 |
| C030014I23Rik | -0.445 | 5.005 | -2.730 | 0.014 | 0.096 | -3.163 |
| H2-Ab1        | 3.588  | 8.269 | 2.729  | 0.014 | 0.096 | -3.163 |
| Spred1        | 0.383  | 7.709 | 2.729  | 0.014 | 0.096 | -3.164 |
| Mrpl16        | -0.627 | 8.898 | -2.729 | 0.014 | 0.096 | -3.165 |
| Dhrs11        | -0.750 | 7.791 | -2.728 | 0.014 | 0.096 | -3.165 |
| BC038331      | -0.458 | 5.359 | -2.728 | 0.014 | 0.096 | -3.165 |
| Fmod          | -0.411 | 4.061 | -2.728 | 0.014 | 0.096 | -3.166 |
| Mett12        | 0.397  | 5.265 | 2.728  | 0.014 | 0.096 | -3.166 |
| Igkv1-117     | -0.474 | 2.665 | -2.728 | 0.014 | 0.096 | -3.166 |
| Tbcd1d2b      | 0.413  | 8.653 | 2.728  | 0.014 | 0.096 | -3.167 |
| Bbs7          | -0.482 | 2.853 | -2.728 | 0.014 | 0.096 | -3.167 |
| Npy6r         | -0.438 | 3.603 | -2.727 | 0.014 | 0.096 | -3.168 |
| Zim1          | -0.388 | 3.319 | -2.727 | 0.014 | 0.096 | -3.168 |
| Ccdc87        | -0.414 | 3.251 | -2.726 | 0.014 | 0.096 | -3.170 |
| 4632404M16Rik | -0.327 | 2.752 | -2.725 | 0.014 | 0.096 | -3.172 |
| Ice2          | 0.427  | 6.671 | 2.725  | 0.014 | 0.096 | -3.172 |
| Gats12        | -0.368 | 3.151 | -2.724 | 0.014 | 0.096 | -3.173 |
| Cdkal1        | -0.641 | 5.997 | -2.724 | 0.014 | 0.096 | -3.174 |
| Trpv6         | -0.464 | 5.456 | -2.724 | 0.014 | 0.096 | -3.174 |
| 1700023B13Rik | -0.466 | 5.411 | -2.724 | 0.014 | 0.096 | -3.174 |
| LOC102641624  | -0.327 | 3.242 | -2.724 | 0.014 | 0.096 | -3.174 |
| Nags          | -0.389 | 4.232 | -2.724 | 0.014 | 0.096 | -3.175 |
| Jmjd6         | 0.569  | 7.543 | 2.723  | 0.014 | 0.096 | -3.175 |
| Ckap4         | 0.663  | 8.585 | 2.723  | 0.014 | 0.096 | -3.175 |
| 4930413E15Rik | -0.338 | 3.548 | -2.723 | 0.014 | 0.096 | -3.175 |
| Fbxo38        | 0.403  | 7.322 | 2.723  | 0.014 | 0.096 | -3.176 |
| Rmdn3         | 0.715  | 9.158 | 2.723  | 0.014 | 0.096 | -3.177 |
| 2310014L17Rik | -0.485 | 5.102 | -2.723 | 0.014 | 0.096 | -3.177 |
| AK076909      | -0.442 | 4.015 | -2.722 | 0.014 | 0.097 | -3.178 |
| Zik1          | -0.345 | 3.054 | -2.721 | 0.014 | 0.097 | -3.179 |
| Ccdc184       | -0.402 | 5.244 | -2.721 | 0.014 | 0.097 | -3.180 |
| Myoz3         | -0.430 | 3.533 | -2.721 | 0.014 | 0.097 | -3.180 |
| Chfr          | 0.301  | 8.580 | 2.721  | 0.014 | 0.097 | -3.181 |
| Frem2         | -1.682 | 4.920 | -2.720 | 0.014 | 0.097 | -3.181 |
| Sfxn1         | 0.660  | 8.919 | 2.720  | 0.014 | 0.097 | -3.182 |
| 4933411E06Rik | -0.253 | 2.139 | -2.720 | 0.014 | 0.097 | -3.183 |

|               |        |        |        |       |       |        |
|---------------|--------|--------|--------|-------|-------|--------|
| Lzts3         | 0.362  | 7.394  | 2.719  | 0.014 | 0.097 | -3.183 |
| Gm6756        | -0.508 | 7.223  | -2.719 | 0.014 | 0.097 | -3.183 |
| 4833417C18Rik | -0.465 | 3.383  | -2.719 | 0.014 | 0.097 | -3.183 |
| Chil1         | 2.692  | 7.110  | 2.719  | 0.014 | 0.097 | -3.184 |
| Tmie          | -0.396 | 4.199  | -2.719 | 0.014 | 0.097 | -3.184 |
| Wdr3          | 0.589  | 8.051  | 2.719  | 0.014 | 0.097 | -3.184 |
| Syt7          | -0.323 | 4.380  | -2.718 | 0.014 | 0.097 | -3.185 |
| Zmynd15       | 0.548  | 4.390  | 2.718  | 0.014 | 0.097 | -3.185 |
| 1700023F06Rik | -0.387 | 2.951  | -2.718 | 0.014 | 0.097 | -3.186 |
| Zc3h7a        | 1.208  | 6.344  | 2.718  | 0.014 | 0.097 | -3.186 |
| Chst3         | -0.391 | 4.642  | -2.718 | 0.014 | 0.097 | -3.186 |
| Mr1           | -0.471 | 5.505  | -2.718 | 0.014 | 0.097 | -3.186 |
| 1700003E16Rik | -0.646 | 6.734  | -2.717 | 0.014 | 0.097 | -3.188 |
| BB168181      | -0.361 | 2.494  | -2.716 | 0.015 | 0.097 | -3.189 |
| Ms4a6b        | 1.857  | 6.112  | 2.716  | 0.015 | 0.097 | -3.189 |
| Mov1011       | -0.504 | 3.835  | -2.715 | 0.015 | 0.097 | -3.191 |
| Pcx           | -0.429 | 9.123  | -2.715 | 0.015 | 0.097 | -3.192 |
| Anks1         | -0.312 | 7.519  | -2.714 | 0.015 | 0.097 | -3.194 |
| Nsg2          | -0.443 | 4.734  | -2.713 | 0.015 | 0.098 | -3.196 |
| Six1          | -0.365 | 2.611  | -2.713 | 0.015 | 0.098 | -3.196 |
| Nup93         | 0.522  | 7.376  | 2.712  | 0.015 | 0.098 | -3.197 |
| 2810408B13Rik | -0.364 | 2.481  | -2.712 | 0.015 | 0.098 | -3.197 |
| Echdc2        | -0.680 | 6.266  | -2.712 | 0.015 | 0.098 | -3.197 |
| Lonrf1        | -1.166 | 7.262  | -2.712 | 0.015 | 0.098 | -3.198 |
| Spast         | 0.377  | 7.881  | 2.711  | 0.015 | 0.098 | -3.198 |
| Dmwd          | -0.335 | 5.641  | -2.711 | 0.015 | 0.098 | -3.200 |
| Rela          | 0.290  | 8.939  | 2.711  | 0.015 | 0.098 | -3.200 |
| Rgs3          | 0.519  | 7.442  | 2.710  | 0.015 | 0.098 | -3.201 |
| Necap2        | -0.376 | 7.085  | -2.710 | 0.015 | 0.098 | -3.201 |
| BC064078      | 0.695  | 4.059  | 2.710  | 0.015 | 0.098 | -3.201 |
| Aox4          | -0.454 | 2.824  | -2.709 | 0.015 | 0.098 | -3.202 |
| Gm15393       | -0.657 | 4.394  | -2.708 | 0.015 | 0.098 | -3.204 |
| Hn1           | 0.750  | 9.811  | 2.708  | 0.015 | 0.098 | -3.205 |
| 1700101I19Rik | -0.524 | 5.628  | -2.707 | 0.015 | 0.098 | -3.207 |
| Kcnc2         | -0.391 | 2.815  | -2.707 | 0.015 | 0.098 | -3.207 |
| Gin1          | -0.464 | 4.372  | -2.707 | 0.015 | 0.098 | -3.207 |
| 6430709C05Rik | -0.409 | 2.446  | -2.706 | 0.015 | 0.098 | -3.208 |
| Ulk2          | -0.641 | 5.048  | -2.706 | 0.015 | 0.098 | -3.208 |
| Pdia3         | 0.877  | 11.299 | 2.706  | 0.015 | 0.098 | -3.209 |
| Mettl8        | -0.421 | 5.647  | -2.706 | 0.015 | 0.098 | -3.209 |
| 4933404K13Rik | -0.354 | 3.310  | -2.705 | 0.015 | 0.099 | -3.210 |
| Apoe          | 2.150  | 8.134  | 2.705  | 0.015 | 0.099 | -3.210 |
| Myo16         | -0.740 | 5.462  | -2.705 | 0.015 | 0.099 | -3.211 |
| B230117015Rik | 1.194  | 4.532  | 2.705  | 0.015 | 0.099 | -3.211 |
| Tmem68        | 0.294  | 7.611  | 2.704  | 0.015 | 0.099 | -3.212 |
| 4930524N10Rik | -0.404 | 2.909  | -2.704 | 0.015 | 0.099 | -3.212 |
| Cyp51         | 0.686  | 7.913  | 2.704  | 0.015 | 0.099 | -3.213 |
| Foxi1         | -0.490 | 3.788  | -2.703 | 0.015 | 0.099 | -3.213 |
| Slc38a6       | -0.488 | 3.568  | -2.703 | 0.015 | 0.099 | -3.214 |
| 9530036011Rik | -0.876 | 7.403  | -2.703 | 0.015 | 0.099 | -3.215 |

|               |        |        |        |       |       |        |
|---------------|--------|--------|--------|-------|-------|--------|
| Gnb2          | 0.495  | 10.382 | 2.703  | 0.015 | 0.099 | -3.215 |
| Trib1         | 0.614  | 7.328  | 2.702  | 0.015 | 0.099 | -3.216 |
| Nfkb1l1       | 0.499  | 4.685  | 2.702  | 0.015 | 0.099 | -3.217 |
| 4930483J18Rik | -0.519 | 4.573  | -2.702 | 0.015 | 0.099 | -3.217 |
| Nqo1          | -0.657 | 10.550 | -2.702 | 0.015 | 0.099 | -3.217 |
| Rcn2          | 0.633  | 8.346  | 2.702  | 0.015 | 0.099 | -3.217 |
| Dnal4         | -0.297 | 6.430  | -2.701 | 0.015 | 0.099 | -3.217 |
| Ctsr          | -0.259 | 2.699  | -2.701 | 0.015 | 0.099 | -3.217 |
| Rbck1         | 0.456  | 8.703  | 2.701  | 0.015 | 0.099 | -3.218 |
| Apba2         | -0.328 | 3.830  | -2.701 | 0.015 | 0.099 | -3.219 |
| Nek2          | 0.589  | 5.427  | 2.701  | 0.015 | 0.099 | -3.219 |
| Pcmt2         | -0.473 | 7.542  | -2.701 | 0.015 | 0.099 | -3.219 |
| Srl           | -0.520 | 4.321  | -2.700 | 0.015 | 0.099 | -3.219 |
| Hint3         | -0.487 | 8.386  | -2.700 | 0.015 | 0.099 | -3.219 |
| 5730408K05Rik | 0.767  | 6.744  | 2.700  | 0.015 | 0.099 | -3.220 |
| Smg5          | 0.335  | 7.482  | 2.700  | 0.015 | 0.099 | -3.220 |
| Macrodl       | -1.222 | 7.456  | -2.700 | 0.015 | 0.099 | -3.220 |
| Setmar        | -0.515 | 6.040  | -2.700 | 0.015 | 0.099 | -3.220 |
| Apoalbp       | -0.440 | 9.419  | -2.700 | 0.015 | 0.099 | -3.221 |
| Fam81a        | -0.546 | 4.695  | -2.699 | 0.015 | 0.099 | -3.222 |
| Col10a1       | -0.450 | 3.829  | -2.698 | 0.015 | 0.099 | -3.223 |
| 9430024F10Rik | -0.378 | 2.949  | -2.698 | 0.015 | 0.099 | -3.223 |
| Rchyl         | -0.326 | 8.926  | -2.698 | 0.015 | 0.099 | -3.224 |
| Tom1l2        | -0.353 | 3.498  | -2.698 | 0.015 | 0.099 | -3.224 |
| Zfp688        | -0.490 | 6.428  | -2.697 | 0.015 | 0.099 | -3.225 |
| Csn1s1        | -0.385 | 3.892  | -2.697 | 0.015 | 0.099 | -3.225 |
| Hoxb3         | -0.372 | 5.582  | -2.697 | 0.015 | 0.099 | -3.226 |
| D6Ertd234e    | -0.327 | 4.252  | -2.697 | 0.015 | 0.099 | -3.227 |
| Hivep3        | 0.975  | 6.664  | 2.696  | 0.015 | 0.099 | -3.227 |
| 4930403018Rik | -0.347 | 2.482  | -2.696 | 0.015 | 0.099 | -3.228 |
| Parg          | 0.463  | 7.599  | 2.696  | 0.015 | 0.099 | -3.228 |
| Abcb1b        | -0.321 | 3.538  | -2.695 | 0.015 | 0.099 | -3.229 |
| Gm13305       | -1.008 | 8.926  | -2.695 | 0.015 | 0.099 | -3.229 |
| 9030622022Rik | -0.661 | 5.798  | -2.694 | 0.015 | 0.100 | -3.231 |
| Foxc1         | -0.637 | 3.067  | -2.694 | 0.015 | 0.100 | -3.232 |
| 2610301B20Rik | -0.354 | 4.810  | -2.693 | 0.015 | 0.100 | -3.233 |
| 6330403L08Rik | -0.472 | 4.150  | -2.693 | 0.015 | 0.100 | -3.233 |
| Mtmr12        | 0.542  | 7.837  | 2.693  | 0.015 | 0.100 | -3.233 |
| Dysf          | -0.436 | 4.604  | -2.693 | 0.015 | 0.100 | -3.234 |
| Irx4          | -0.420 | 4.032  | -2.692 | 0.015 | 0.100 | -3.235 |
| C81001        | -0.283 | 3.188  | -2.692 | 0.015 | 0.100 | -3.235 |
| Sugp2         | 0.675  | 6.630  | 2.692  | 0.015 | 0.100 | -3.235 |
| Kank4         | -0.384 | 5.408  | -2.692 | 0.015 | 0.100 | -3.236 |
| Sox8          | -0.461 | 2.966  | -2.692 | 0.015 | 0.100 | -3.236 |
| Bex4          | -1.484 | 6.348  | -2.691 | 0.015 | 0.100 | -3.237 |
| Fnip2         | -0.876 | 7.415  | -2.690 | 0.015 | 0.100 | -3.239 |
| 1700018L02Rik | -0.456 | 4.971  | -2.690 | 0.015 | 0.100 | -3.239 |
| Ttr           | -2.055 | 8.904  | -2.690 | 0.015 | 0.100 | -3.239 |
| Kera          | -0.366 | 2.642  | -2.690 | 0.015 | 0.100 | -3.239 |
| Ubl4b         | -0.345 | 2.710  | -2.690 | 0.015 | 0.100 | -3.239 |

|               |        |        |        |       |       |        |
|---------------|--------|--------|--------|-------|-------|--------|
| 2700046G09Rik | -0.450 | 5.346  | -2.690 | 0.015 | 0.100 | -3.239 |
| Spatc11       | -0.356 | 4.310  | -2.690 | 0.015 | 0.100 | -3.239 |
| Pptc7         | 0.563  | 9.403  | 2.690  | 0.015 | 0.100 | -3.240 |
| Rhof          | -0.558 | 8.252  | -2.689 | 0.015 | 0.100 | -3.240 |
| Tardbp        | 0.395  | 8.976  | 2.689  | 0.015 | 0.100 | -3.241 |
| Zfp763        | 0.542  | 5.003  | 2.688  | 0.015 | 0.100 | -3.243 |
| Fucal         | 0.451  | 11.159 | 2.688  | 0.015 | 0.100 | -3.244 |
| Rcbtb1        | -0.364 | 4.714  | -2.687 | 0.015 | 0.100 | -3.244 |
| Zfp462        | -0.517 | 4.172  | -2.687 | 0.015 | 0.100 | -3.245 |
| Col17a1       | -0.436 | 2.632  | -2.687 | 0.015 | 0.100 | -3.245 |
| H2-K1         | 1.248  | 13.129 | 2.687  | 0.015 | 0.100 | -3.245 |
| Sash1         | -0.455 | 3.785  | -2.687 | 0.015 | 0.100 | -3.246 |
| Tceal7        | -0.372 | 2.542  | -2.686 | 0.015 | 0.100 | -3.247 |
| 5330426L24Rik | -0.352 | 4.593  | -2.685 | 0.016 | 0.101 | -3.249 |
| Dcaf11        | -0.300 | 9.139  | -2.684 | 0.016 | 0.101 | -3.250 |
| Tbcd31        | -0.475 | 5.768  | -2.684 | 0.016 | 0.101 | -3.251 |
| Krtap17-1     | -0.475 | 3.467  | -2.684 | 0.016 | 0.101 | -3.251 |
| Ncoa4         | -0.530 | 9.578  | -2.684 | 0.016 | 0.101 | -3.251 |
| Cd209a        | -0.526 | 3.609  | -2.684 | 0.016 | 0.101 | -3.251 |
| AW209491      | 0.369  | 7.733  | 2.683  | 0.016 | 0.101 | -3.253 |
| Phf20         | -0.377 | 6.337  | -2.683 | 0.016 | 0.101 | -3.253 |
| Exoc314       | 2.112  | 6.131  | 2.682  | 0.016 | 0.101 | -3.254 |
| Tmem232       | -0.302 | 2.517  | -2.682 | 0.016 | 0.101 | -3.254 |
| Xkr5          | -0.410 | 4.231  | -2.682 | 0.016 | 0.101 | -3.254 |
| Gdap111       | -0.484 | 3.567  | -2.682 | 0.016 | 0.101 | -3.255 |
| Dyrklb        | -0.431 | 6.495  | -2.682 | 0.016 | 0.101 | -3.255 |
| Gabarapl1     | -1.188 | 7.479  | -2.681 | 0.016 | 0.101 | -3.256 |
| 4930564C03Rik | -0.336 | 2.707  | -2.681 | 0.016 | 0.101 | -3.256 |
| Olf315        | -0.324 | 2.926  | -2.681 | 0.016 | 0.101 | -3.256 |
| Rnaset2a      | -0.583 | 4.833  | -2.681 | 0.016 | 0.101 | -3.256 |
| Ifna5         | -0.303 | 3.132  | -2.681 | 0.016 | 0.101 | -3.257 |
| Slmo2         | 0.389  | 8.214  | 2.680  | 0.016 | 0.101 | -3.258 |
| Celf1         | -0.492 | 4.913  | -2.680 | 0.016 | 0.101 | -3.258 |
| Unc5b         | -0.490 | 8.017  | -2.680 | 0.016 | 0.101 | -3.259 |
| C86695        | -0.540 | 2.982  | -2.680 | 0.016 | 0.101 | -3.259 |
| Pmaip1        | 0.563  | 7.725  | 2.679  | 0.016 | 0.101 | -3.259 |
| Yipf6         | 0.664  | 7.318  | 2.679  | 0.016 | 0.101 | -3.260 |
| Becn2         | -0.441 | 3.203  | -2.679 | 0.016 | 0.101 | -3.260 |
| Ids           | -0.515 | 5.000  | -2.679 | 0.016 | 0.101 | -3.261 |
| 8430437L04Rik | -0.395 | 3.196  | -2.679 | 0.016 | 0.101 | -3.261 |
| Ccpglos       | -0.804 | 5.763  | -2.678 | 0.016 | 0.101 | -3.262 |
| Utf1          | -0.371 | 6.197  | -2.677 | 0.016 | 0.101 | -3.264 |
| Cmtm8         | -0.570 | 9.348  | -2.677 | 0.016 | 0.101 | -3.264 |
| Tmem8b        | -0.349 | 4.774  | -2.677 | 0.016 | 0.101 | -3.265 |
| Slc35e4       | -0.299 | 5.881  | -2.676 | 0.016 | 0.101 | -3.265 |
| Ccdc81        | -0.351 | 2.480  | -2.676 | 0.016 | 0.101 | -3.265 |
| AY074887      | -0.369 | 2.887  | -2.675 | 0.016 | 0.102 | -3.268 |
| Zfp1          | 0.367  | 6.568  | 2.675  | 0.016 | 0.102 | -3.269 |
| 1700080G18Rik | -0.422 | 5.623  | -2.675 | 0.016 | 0.102 | -3.269 |
| Azgp1         | -1.728 | 6.189  | -2.674 | 0.016 | 0.102 | -3.270 |

|               |        |        |        |       |       |        |
|---------------|--------|--------|--------|-------|-------|--------|
| 9130214F15Rik | -0.535 | 4.043  | -2.674 | 0.016 | 0.102 | -3.270 |
| Mob1a         | 0.436  | 9.175  | 2.674  | 0.016 | 0.102 | -3.271 |
| Slc18a1       | -0.481 | 4.518  | -2.674 | 0.016 | 0.102 | -3.271 |
| Spg7          | -0.386 | 7.945  | -2.673 | 0.016 | 0.102 | -3.271 |
| Evi2a-evi2b   | 0.723  | 4.066  | 2.673  | 0.016 | 0.102 | -3.271 |
| Zfp386        | -0.770 | 5.375  | -2.673 | 0.016 | 0.102 | -3.272 |
| LOC100044627  | 0.243  | 12.973 | 2.672  | 0.016 | 0.102 | -3.274 |
| Zfp444        | -0.542 | 6.401  | -2.671 | 0.016 | 0.102 | -3.275 |
| Snrpal        | 0.840  | 8.252  | 2.671  | 0.016 | 0.102 | -3.276 |
| D930048N14Rik | -0.444 | 2.989  | -2.670 | 0.016 | 0.102 | -3.278 |
| Hmox2         | -0.540 | 8.890  | -2.668 | 0.016 | 0.103 | -3.281 |
| Epc2          | 0.401  | 7.591  | 2.668  | 0.016 | 0.103 | -3.281 |
| Plin2         | 1.051  | 8.563  | 2.668  | 0.016 | 0.103 | -3.282 |
| Naa15         | 0.558  | 8.303  | 2.667  | 0.016 | 0.103 | -3.283 |
| Gm12816       | 0.271  | 12.875 | 2.667  | 0.016 | 0.103 | -3.284 |
| Hcar1         | -0.410 | 3.735  | -2.666 | 0.016 | 0.103 | -3.285 |
| 1700061E18Rik | -0.395 | 2.633  | -2.666 | 0.016 | 0.103 | -3.285 |
| Clra          | 1.795  | 4.549  | 2.666  | 0.016 | 0.103 | -3.286 |
| Mbtps2        | 0.666  | 4.114  | 2.665  | 0.016 | 0.103 | -3.287 |
| AA517858      | -0.309 | 2.202  | -2.665 | 0.016 | 0.103 | -3.287 |
| Fahd1         | -0.739 | 6.372  | -2.665 | 0.016 | 0.103 | -3.288 |
| Sdf2          | 0.391  | 9.893  | 2.665  | 0.016 | 0.103 | -3.288 |
| Phlpp1        | -0.466 | 7.196  | -2.664 | 0.016 | 0.103 | -3.288 |
| Me2           | -0.845 | 9.070  | -2.664 | 0.016 | 0.103 | -3.288 |
| 9430087N24Rik | -0.421 | 2.544  | -2.664 | 0.016 | 0.103 | -3.289 |
| Cars2         | -0.299 | 6.767  | -2.663 | 0.016 | 0.103 | -3.291 |
| Rab9b         | -0.314 | 2.591  | -2.662 | 0.016 | 0.103 | -3.292 |
| Plxnb3        | -0.481 | 4.389  | -2.662 | 0.016 | 0.103 | -3.292 |
| Snai3         | -0.381 | 4.411  | -2.662 | 0.016 | 0.103 | -3.292 |
| Ly6e          | 1.615  | 7.347  | 2.662  | 0.016 | 0.104 | -3.293 |
| Gm4132        | -0.524 | 3.376  | -2.660 | 0.016 | 0.104 | -3.296 |
| Nkx2-9        | -0.378 | 6.555  | -2.660 | 0.016 | 0.104 | -3.296 |
| Fbxw2         | 0.433  | 6.693  | 2.660  | 0.016 | 0.104 | -3.297 |
| 4930552P12Rik | -0.364 | 3.754  | -2.660 | 0.016 | 0.104 | -3.297 |
| Dbr1          | 0.343  | 7.515  | 2.660  | 0.016 | 0.104 | -3.297 |
| 4930544L04Rik | -0.479 | 3.595  | -2.659 | 0.016 | 0.104 | -3.299 |
| Nlrp12        | -0.382 | 3.095  | -2.659 | 0.016 | 0.104 | -3.299 |
| Car10         | -0.361 | 2.381  | -2.658 | 0.016 | 0.104 | -3.300 |
| D11Ertd326e   | -0.440 | 3.569  | -2.658 | 0.016 | 0.104 | -3.301 |
| 1700031F10Rik | -0.418 | 3.598  | -2.657 | 0.016 | 0.104 | -3.302 |
| Drd4          | -0.375 | 4.360  | -2.657 | 0.016 | 0.104 | -3.302 |
| Nrep          | 0.965  | 5.297  | 2.657  | 0.016 | 0.104 | -3.302 |
| 8030453022Rik | -0.583 | 3.541  | -2.657 | 0.016 | 0.104 | -3.303 |
| Mcee          | -0.800 | 7.737  | -2.657 | 0.016 | 0.104 | -3.303 |
| Nup2101       | -0.413 | 5.955  | -2.656 | 0.016 | 0.104 | -3.303 |
| Csf2ra        | 0.816  | 5.669  | 2.656  | 0.016 | 0.104 | -3.304 |
| Iglc1         | 3.597  | 6.088  | 2.656  | 0.016 | 0.104 | -3.304 |
| Gbe1          | -0.607 | 5.471  | -2.656 | 0.016 | 0.104 | -3.304 |
| Psmb8         | 3.323  | 8.952  | 2.656  | 0.016 | 0.104 | -3.304 |
| 6430553K19Rik | -0.406 | 2.976  | -2.656 | 0.016 | 0.104 | -3.305 |

|               |        |        |        |       |       |        |
|---------------|--------|--------|--------|-------|-------|--------|
| St3gal5       | -0.743 | 7.530  | -2.656 | 0.016 | 0.104 | -3.305 |
| Xkr6          | -0.432 | 4.685  | -2.655 | 0.016 | 0.104 | -3.305 |
| Sema6d        | 0.327  | 3.099  | 2.655  | 0.016 | 0.104 | -3.305 |
| Smim6         | -0.426 | 10.588 | -2.655 | 0.016 | 0.104 | -3.306 |
| Srgap1        | -0.438 | 3.175  | -2.655 | 0.017 | 0.104 | -3.306 |
| Atp6v0d2      | 1.901  | 9.051  | 2.655  | 0.017 | 0.104 | -3.307 |
| Dapk1         | 0.631  | 6.104  | 2.655  | 0.017 | 0.104 | -3.307 |
| Dcst1         | -0.462 | 3.672  | -2.655 | 0.017 | 0.104 | -3.307 |
| Hectd2        | 0.383  | 2.527  | 2.654  | 0.017 | 0.104 | -3.307 |
| Catsperg2     | -0.351 | 3.237  | -2.654 | 0.017 | 0.104 | -3.308 |
| Msn           | 0.698  | 7.637  | 2.653  | 0.017 | 0.104 | -3.309 |
| Zdhhc2        | -0.812 | 7.314  | -2.653 | 0.017 | 0.104 | -3.310 |
| Trafd1        | 1.200  | 8.227  | 2.653  | 0.017 | 0.104 | -3.310 |
| Mesdc1        | 0.298  | 7.965  | 2.652  | 0.017 | 0.105 | -3.311 |
| Plbd2         | -0.427 | 6.680  | -2.652 | 0.017 | 0.105 | -3.311 |
| Gm5963        | 0.289  | 12.572 | 2.652  | 0.017 | 0.105 | -3.312 |
| Rnf8          | 0.378  | 7.756  | 2.652  | 0.017 | 0.105 | -3.312 |
| Svip          | -0.507 | 6.575  | -2.652 | 0.017 | 0.105 | -3.312 |
| H2-Q5         | 1.913  | 6.057  | 2.651  | 0.017 | 0.105 | -3.313 |
| Upp1          | 1.398  | 9.560  | 2.651  | 0.017 | 0.105 | -3.314 |
| 6230400D17Rik | -0.389 | 2.759  | -2.651 | 0.017 | 0.105 | -3.314 |
| Snrpf         | 0.780  | 8.149  | 2.650  | 0.017 | 0.105 | -3.315 |
| 2900008C10Rik | -0.486 | 3.439  | -2.650 | 0.017 | 0.105 | -3.315 |
| Psmb9         | 2.496  | 9.464  | 2.650  | 0.017 | 0.105 | -3.316 |
| AK076759      | -0.291 | 2.287  | -2.650 | 0.017 | 0.105 | -3.316 |
| Hnrnpa1       | 0.786  | 8.265  | 2.650  | 0.017 | 0.105 | -3.316 |
| Kmt2a         | 0.653  | 7.273  | 2.649  | 0.017 | 0.105 | -3.317 |
| Rsph6a        | -0.497 | 4.320  | -2.649 | 0.017 | 0.105 | -3.317 |
| Fzd10         | -0.425 | 2.742  | -2.649 | 0.017 | 0.105 | -3.318 |
| Scap          | -0.356 | 9.765  | -2.649 | 0.017 | 0.105 | -3.318 |
| Cdpf1         | -0.427 | 7.218  | -2.649 | 0.017 | 0.105 | -3.318 |
| Slc20a2       | 0.486  | 6.604  | 2.648  | 0.017 | 0.105 | -3.319 |
| Fbxw16        | -0.585 | 5.384  | -2.648 | 0.017 | 0.105 | -3.319 |
| Clql1         | -0.275 | 3.196  | -2.648 | 0.017 | 0.105 | -3.319 |
| Baalc         | -0.463 | 2.928  | -2.648 | 0.017 | 0.105 | -3.320 |
| Acox1         | -0.378 | 10.333 | -2.647 | 0.017 | 0.105 | -3.322 |
| P4ha2         | -1.471 | 6.975  | -2.647 | 0.017 | 0.105 | -3.322 |
| Tnks2         | 0.298  | 10.386 | 2.647  | 0.017 | 0.105 | -3.322 |
| Pnma3         | -0.324 | 2.932  | -2.646 | 0.017 | 0.105 | -3.323 |
| Clec2d        | 0.616  | 5.027  | 2.646  | 0.017 | 0.105 | -3.323 |
| Hnrnpa0       | 0.393  | 9.131  | 2.646  | 0.017 | 0.105 | -3.324 |
| Piwil2        | 0.476  | 3.629  | 2.645  | 0.017 | 0.105 | -3.324 |
| Tapbp         | 1.109  | 10.704 | 2.645  | 0.017 | 0.105 | -3.325 |
| Ino80d        | 0.528  | 7.779  | 2.644  | 0.017 | 0.105 | -3.327 |
| Smyd2         | 0.605  | 7.876  | 2.643  | 0.017 | 0.106 | -3.329 |
| Fam49a        | -0.404 | 4.083  | -2.643 | 0.017 | 0.106 | -3.329 |
| 3110067C02Rik | -0.335 | 2.411  | -2.643 | 0.017 | 0.106 | -3.330 |
| Pisd          | -0.275 | 10.105 | -2.642 | 0.017 | 0.106 | -3.331 |
| Havcr1        | -0.521 | 3.820  | -2.641 | 0.017 | 0.106 | -3.332 |
| Akr1c18       | -0.304 | 4.892  | -2.641 | 0.017 | 0.106 | -3.332 |

|               |        |        |        |       |       |        |
|---------------|--------|--------|--------|-------|-------|--------|
| Dnajb7        | -0.442 | 2.612  | -2.641 | 0.017 | 0.106 | -3.332 |
| Kcnk3         | -0.863 | 5.880  | -2.641 | 0.017 | 0.106 | -3.333 |
| D1Erttd228e   | -0.404 | 5.118  | -2.641 | 0.017 | 0.106 | -3.333 |
| Dmrt1         | -0.302 | 3.120  | -2.641 | 0.017 | 0.106 | -3.334 |
| Celsr3        | -0.381 | 4.532  | -2.640 | 0.017 | 0.106 | -3.334 |
| Endov         | -0.467 | 5.222  | -2.640 | 0.017 | 0.106 | -3.335 |
| 4930423M02Rik | -0.319 | 5.015  | -2.640 | 0.017 | 0.106 | -3.336 |
| Nb11          | -0.379 | 5.518  | -2.639 | 0.017 | 0.106 | -3.336 |
| Pnrc1         | -0.597 | 8.990  | -2.639 | 0.017 | 0.106 | -3.336 |
| Strip2        | 1.557  | 4.529  | 2.639  | 0.017 | 0.106 | -3.336 |
| Airn          | -0.440 | 2.760  | -2.639 | 0.017 | 0.106 | -3.337 |
| Spdyb         | -0.478 | 4.447  | -2.639 | 0.017 | 0.106 | -3.337 |
| Fbxo46        | -0.438 | 5.943  | -2.639 | 0.017 | 0.106 | -3.337 |
| Hsd3b2        | -0.468 | 3.047  | -2.639 | 0.017 | 0.106 | -3.337 |
| Ezh2          | 0.470  | 7.789  | 2.638  | 0.017 | 0.106 | -3.338 |
| Dnajc2        | 0.564  | 8.553  | 2.638  | 0.017 | 0.106 | -3.338 |
| 4930517019Rik | -0.393 | 2.635  | -2.638 | 0.017 | 0.106 | -3.339 |
| Srsf1         | 0.453  | 7.824  | 2.638  | 0.017 | 0.106 | -3.339 |
| Cpal          | -0.508 | 3.722  | -2.638 | 0.017 | 0.106 | -3.339 |
| Eno1          | -0.359 | 12.006 | -2.637 | 0.017 | 0.106 | -3.340 |
| B330016D10Rik | -0.402 | 4.267  | -2.637 | 0.017 | 0.106 | -3.340 |
| Tet2          | 1.524  | 6.615  | 2.636  | 0.017 | 0.106 | -3.341 |
| Cldn3         | -0.470 | 4.435  | -2.636 | 0.017 | 0.106 | -3.342 |
| Wdr5          | 0.327  | 7.518  | 2.636  | 0.017 | 0.106 | -3.342 |
| Ankrd45       | -0.405 | 3.742  | -2.636 | 0.017 | 0.106 | -3.343 |
| Olfra658      | -0.432 | 2.803  | -2.636 | 0.017 | 0.106 | -3.343 |
| Snhg4         | 0.696  | 7.005  | 2.635  | 0.017 | 0.106 | -3.343 |
| Rnf168        | 0.388  | 7.906  | 2.635  | 0.017 | 0.106 | -3.344 |
| Gcc2          | 0.483  | 10.444 | 2.635  | 0.017 | 0.106 | -3.344 |
| Gm15776       | -0.315 | 12.380 | -2.635 | 0.017 | 0.106 | -3.344 |
| D8Erttd107e   | -0.304 | 3.500  | -2.635 | 0.017 | 0.106 | -3.344 |
| Pvr12         | 0.516  | 9.113  | 2.635  | 0.017 | 0.106 | -3.345 |
| Snail         | -0.373 | 4.240  | -2.634 | 0.017 | 0.106 | -3.345 |
| Lrp5          | 0.682  | 6.006  | 2.634  | 0.017 | 0.106 | -3.346 |
| Slc25a27      | -0.410 | 3.184  | -2.634 | 0.017 | 0.106 | -3.346 |
| Spata24       | -0.308 | 4.579  | -2.634 | 0.017 | 0.106 | -3.347 |
| 5530402H23Rik | 0.716  | 4.197  | 2.634  | 0.017 | 0.106 | -3.347 |
| Aqp11         | -0.536 | 5.854  | -2.634 | 0.017 | 0.106 | -3.347 |
| S100a16       | 0.715  | 10.637 | 2.633  | 0.017 | 0.107 | -3.348 |
| Ifna2         | -0.540 | 3.883  | -2.633 | 0.017 | 0.107 | -3.348 |
| Itgb21        | -0.530 | 4.849  | -2.632 | 0.017 | 0.107 | -3.349 |
| C79741        | -0.454 | 4.438  | -2.632 | 0.017 | 0.107 | -3.350 |
| Smc1b         | -0.387 | 4.250  | -2.632 | 0.017 | 0.107 | -3.350 |
| Pnma11        | -0.368 | 3.875  | -2.631 | 0.017 | 0.107 | -3.351 |
| Syt10         | -0.283 | 3.122  | -2.630 | 0.017 | 0.107 | -3.353 |
| Ost4          | -0.354 | 3.453  | -2.630 | 0.017 | 0.107 | -3.353 |
| Gas5          | 1.811  | 6.790  | 2.630  | 0.017 | 0.107 | -3.354 |
| Plekhol       | 0.692  | 4.830  | 2.630  | 0.017 | 0.107 | -3.354 |
| Setdb1        | -0.477 | 4.224  | -2.630 | 0.017 | 0.107 | -3.354 |
| Upk1b         | 1.930  | 5.479  | 2.630  | 0.017 | 0.107 | -3.354 |



|               |        |        |        |       |       |        |
|---------------|--------|--------|--------|-------|-------|--------|
| 4933424M12Rik | -0.414 | 2.883  | -2.629 | 0.017 | 0.107 | -3.356 |
| Tmtc2         | 0.509  | 7.272  | 2.628  | 0.017 | 0.107 | -3.357 |
| Cngb3         | -0.337 | 2.362  | -2.628 | 0.017 | 0.107 | -3.357 |
| Cyp26a1       | -0.459 | 4.713  | -2.628 | 0.017 | 0.107 | -3.357 |
| Gm3556        | 0.685  | 5.262  | 2.628  | 0.017 | 0.107 | -3.358 |
| Rbbp7         | 0.841  | 11.365 | 2.628  | 0.017 | 0.107 | -3.358 |
| Tspyl4        | -0.752 | 6.516  | -2.628 | 0.017 | 0.107 | -3.358 |
| Arhgap26      | -0.335 | 3.243  | -2.627 | 0.017 | 0.107 | -3.359 |
| Gm13441       | -0.319 | 4.576  | -2.627 | 0.017 | 0.107 | -3.359 |
| Krtap4-1      | -0.239 | 2.598  | -2.627 | 0.017 | 0.107 | -3.360 |
| Tmem210       | -0.421 | 5.021  | -2.627 | 0.018 | 0.107 | -3.360 |
| Mrc1          | 0.802  | 5.509  | 2.626  | 0.018 | 0.107 | -3.361 |
| Mapklip1      | -0.411 | 6.823  | -2.626 | 0.018 | 0.107 | -3.362 |
| AA517650      | -0.391 | 3.846  | -2.625 | 0.018 | 0.107 | -3.362 |
| Gatsl3        | -0.568 | 5.722  | -2.625 | 0.018 | 0.108 | -3.363 |
| Cdc14b        | -0.502 | 7.109  | -2.625 | 0.018 | 0.108 | -3.363 |
| Fcgbp         | 2.051  | 11.027 | 2.625  | 0.018 | 0.108 | -3.364 |
| Myolc         | 0.415  | 8.715  | 2.624  | 0.018 | 0.108 | -3.365 |
| Edrf1         | -0.394 | 3.220  | -2.624 | 0.018 | 0.108 | -3.365 |
| 5730412P04Rik | -0.509 | 3.413  | -2.624 | 0.018 | 0.108 | -3.366 |
| Misp          | 0.773  | 10.172 | 2.623  | 0.018 | 0.108 | -3.366 |
| A330084C13Rik | -0.304 | 3.199  | -2.623 | 0.018 | 0.108 | -3.366 |
| H2-DMb1       | 3.323  | 7.478  | 2.623  | 0.018 | 0.108 | -3.367 |
| Mettl24       | -0.373 | 3.313  | -2.623 | 0.018 | 0.108 | -3.368 |
| Pde4a         | -0.295 | 5.180  | -2.623 | 0.018 | 0.108 | -3.368 |
| Exoc6         | 0.524  | 6.442  | 2.622  | 0.018 | 0.108 | -3.368 |
| Wwp1          | -0.310 | 8.850  | -2.622 | 0.018 | 0.108 | -3.370 |
| Hecw2         | -2.924 | 4.794  | -2.621 | 0.018 | 0.108 | -3.371 |
| Tenm4         | -0.700 | 5.851  | -2.621 | 0.018 | 0.108 | -3.371 |
| Ndufb9        | -0.587 | 11.695 | -2.621 | 0.018 | 0.108 | -3.371 |
| Gdap1         | -0.469 | 3.595  | -2.620 | 0.018 | 0.108 | -3.372 |
| Ptpru         | -0.670 | 5.810  | -2.620 | 0.018 | 0.108 | -3.372 |
| Ubxn11        | -0.419 | 5.210  | -2.619 | 0.018 | 0.108 | -3.374 |
| Stx8          | -0.397 | 6.509  | -2.619 | 0.018 | 0.108 | -3.374 |
| Nrxn1         | -0.315 | 5.936  | -2.619 | 0.018 | 0.108 | -3.375 |
| Supt6         | 0.284  | 7.754  | 2.619  | 0.018 | 0.108 | -3.375 |
| Nbeal1        | -0.925 | 9.104  | -2.619 | 0.018 | 0.108 | -3.375 |
| Paxbp1        | 0.743  | 7.555  | 2.619  | 0.018 | 0.108 | -3.375 |
| Ezh1          | -0.621 | 4.114  | -2.619 | 0.018 | 0.108 | -3.375 |
| Lrrc36        | -0.525 | 3.764  | -2.618 | 0.018 | 0.108 | -3.376 |
| Tyr           | -0.381 | 3.337  | -2.618 | 0.018 | 0.108 | -3.376 |
| Gpc5          | -0.313 | 2.505  | -2.618 | 0.018 | 0.108 | -3.376 |
| Acr           | -0.469 | 4.731  | -2.618 | 0.018 | 0.108 | -3.376 |
| Slc25a36      | -0.813 | 5.920  | -2.618 | 0.018 | 0.108 | -3.377 |
| Cog3          | 0.678  | 7.874  | 2.618  | 0.018 | 0.108 | -3.377 |
| 9430019H13Rik | -0.287 | 2.398  | -2.618 | 0.018 | 0.108 | -3.377 |
| Usp44         | -0.370 | 3.292  | -2.617 | 0.018 | 0.108 | -3.378 |
| Adora1        | 0.603  | 6.000  | 2.617  | 0.018 | 0.108 | -3.378 |
| Cspg5         | -0.481 | 4.590  | -2.617 | 0.018 | 0.108 | -3.379 |
| Ntng1         | -0.371 | 3.728  | -2.617 | 0.018 | 0.108 | -3.379 |

|               |        |        |        |       |       |        |
|---------------|--------|--------|--------|-------|-------|--------|
| Fam60a        | 0.622  | 6.166  | 2.617  | 0.018 | 0.108 | -3.379 |
| Mrm1          | -0.434 | 5.900  | -2.616 | 0.018 | 0.108 | -3.380 |
| 4930478P22Rik | -0.473 | 4.480  | -2.615 | 0.018 | 0.109 | -3.382 |
| Pal1          | 0.619  | 6.735  | 2.615  | 0.018 | 0.109 | -3.382 |
| Tgfb1         | 1.403  | 6.934  | 2.615  | 0.018 | 0.109 | -3.383 |
| Gm2011        | -0.342 | 2.637  | -2.614 | 0.018 | 0.109 | -3.383 |
| D030018L15Rik | -0.458 | 4.223  | -2.614 | 0.018 | 0.109 | -3.383 |
| Lims1         | -1.661 | 6.862  | -2.614 | 0.018 | 0.109 | -3.384 |
| Macrod2       | -0.396 | 2.940  | -2.613 | 0.018 | 0.109 | -3.385 |
| Snhg3         | 0.864  | 5.024  | 2.613  | 0.018 | 0.109 | -3.386 |
| Tex12         | -0.343 | 3.037  | -2.613 | 0.018 | 0.109 | -3.387 |
| 9330179D12Rik | -0.334 | 2.514  | -2.612 | 0.018 | 0.109 | -3.387 |
| Scg2          | -1.252 | 4.764  | -2.612 | 0.018 | 0.109 | -3.388 |
| Adora3        | -0.356 | 4.686  | -2.612 | 0.018 | 0.109 | -3.388 |
| Nr1           | -0.434 | 3.999  | -2.612 | 0.018 | 0.109 | -3.389 |
| Rps9          | 1.610  | 5.556  | 2.612  | 0.018 | 0.109 | -3.389 |
| Asphd1        | -0.332 | 4.352  | -2.611 | 0.018 | 0.109 | -3.390 |
| Cse11         | 0.433  | 8.299  | 2.611  | 0.018 | 0.109 | -3.390 |
| 1700029M03Rik | -0.341 | 2.470  | -2.610 | 0.018 | 0.109 | -3.391 |
| 1110006024Rik | -0.317 | 4.265  | -2.610 | 0.018 | 0.109 | -3.391 |
| Ecscr         | 1.079  | 4.626  | 2.610  | 0.018 | 0.109 | -3.391 |
| Dgcr6         | -0.560 | 6.461  | -2.610 | 0.018 | 0.109 | -3.392 |
| H2-Q4         | 3.197  | 6.363  | 2.609  | 0.018 | 0.109 | -3.393 |
| Lipn          | -0.345 | 2.366  | -2.609 | 0.018 | 0.109 | -3.393 |
| Fetub         | 1.141  | 5.579  | 2.608  | 0.018 | 0.110 | -3.396 |
| Klc2          | -0.451 | 6.253  | -2.607 | 0.018 | 0.110 | -3.396 |
| Slc1a5        | 0.891  | 7.579  | 2.607  | 0.018 | 0.110 | -3.397 |
| 2310014F06Rik | -0.473 | 5.014  | -2.607 | 0.018 | 0.110 | -3.397 |
| Sec1414       | -1.275 | 6.214  | -2.607 | 0.018 | 0.110 | -3.397 |
| 4930402C16Rik | -0.472 | 3.716  | -2.607 | 0.018 | 0.110 | -3.398 |
| Slamf6        | -0.464 | 4.472  | -2.607 | 0.018 | 0.110 | -3.398 |
| Sim1          | -0.498 | 4.079  | -2.607 | 0.018 | 0.110 | -3.398 |
| Lrrc46        | -0.393 | 4.983  | -2.607 | 0.018 | 0.110 | -3.398 |
| LOC102638744  | -0.266 | 3.990  | -2.607 | 0.018 | 0.110 | -3.398 |
| 4930444E06Rik | -0.381 | 5.334  | -2.606 | 0.018 | 0.110 | -3.399 |
| 4933402E15Rik | -0.323 | 3.436  | -2.606 | 0.018 | 0.110 | -3.400 |
| Gp1bb         | -0.358 | 3.114  | -2.604 | 0.018 | 0.110 | -3.402 |
| Rap1a         | -0.445 | 10.972 | -2.604 | 0.018 | 0.110 | -3.402 |
| Mlf2          | -0.361 | 9.868  | -2.604 | 0.018 | 0.110 | -3.402 |
| Rpl14         | 0.418  | 11.138 | 2.604  | 0.018 | 0.110 | -3.403 |
| 12-Sep        | -0.333 | 2.639  | -2.604 | 0.018 | 0.110 | -3.403 |
| Aldh111       | -0.689 | 8.476  | -2.604 | 0.018 | 0.110 | -3.404 |
| 5830477G23Rik | -0.366 | 2.968  | -2.603 | 0.018 | 0.110 | -3.404 |
| Gm1673        | -0.285 | 6.089  | -2.603 | 0.018 | 0.110 | -3.405 |
| Pea15a        | 0.421  | 7.194  | 2.603  | 0.018 | 0.110 | -3.405 |
| Lactb11       | -0.390 | 3.966  | -2.603 | 0.018 | 0.110 | -3.405 |
| Gm2824        | -0.364 | 2.662  | -2.602 | 0.018 | 0.110 | -3.406 |
| Vg111         | -0.527 | 4.346  | -2.602 | 0.018 | 0.110 | -3.406 |
| Cplx4         | -0.452 | 3.267  | -2.602 | 0.018 | 0.110 | -3.408 |
| Keap1         | 0.425  | 8.678  | 2.601  | 0.018 | 0.110 | -3.408 |

|               |        |        |        |       |       |        |
|---------------|--------|--------|--------|-------|-------|--------|
| Dmrtc1a       | -0.511 | 4.163  | -2.601 | 0.018 | 0.110 | -3.408 |
| Dctd          | 1.053  | 5.157  | 2.601  | 0.018 | 0.110 | -3.408 |
| Sgk3          | -0.547 | 4.582  | -2.601 | 0.018 | 0.110 | -3.409 |
| Cfhr2         | -0.351 | 3.991  | -2.600 | 0.018 | 0.110 | -3.410 |
| Dnhd1         | -0.361 | 4.320  | -2.600 | 0.018 | 0.110 | -3.410 |
| Plekhh2       | -0.633 | 5.200  | -2.599 | 0.019 | 0.111 | -3.412 |
| Abcb9         | -0.571 | 6.248  | -2.599 | 0.019 | 0.111 | -3.412 |
| Dedd2         | 0.634  | 7.281  | 2.599  | 0.019 | 0.111 | -3.413 |
| Ssbpl         | 0.416  | 10.229 | 2.598  | 0.019 | 0.111 | -3.415 |
| Cyfipl        | 0.453  | 10.205 | 2.598  | 0.019 | 0.111 | -3.415 |
| Ddn           | -0.276 | 4.548  | -2.598 | 0.019 | 0.111 | -3.415 |
| 2900046D03Rik | -0.451 | 3.452  | -2.597 | 0.019 | 0.111 | -3.415 |
| Rab9          | 0.341  | 9.984  | 2.597  | 0.019 | 0.111 | -3.416 |
| Hand2         | -0.477 | 3.078  | -2.597 | 0.019 | 0.111 | -3.417 |
| Ywhah         | 0.308  | 9.922  | 2.596  | 0.019 | 0.111 | -3.417 |
| Mrps10        | 0.529  | 8.625  | 2.596  | 0.019 | 0.111 | -3.418 |
| Ccdc34        | 0.762  | 6.452  | 2.596  | 0.019 | 0.111 | -3.418 |
| Parvb         | -0.493 | 4.299  | -2.596 | 0.019 | 0.111 | -3.418 |
| LOC102633720  | -0.405 | 2.896  | -2.596 | 0.019 | 0.111 | -3.419 |
| Slc22a5       | -0.514 | 4.964  | -2.595 | 0.019 | 0.111 | -3.421 |
| Krt85         | -0.292 | 5.954  | -2.594 | 0.019 | 0.111 | -3.421 |
| Tacc3         | 0.825  | 6.310  | 2.594  | 0.019 | 0.111 | -3.421 |
| Pde6b         | -0.396 | 3.671  | -2.594 | 0.019 | 0.111 | -3.421 |
| 4933423K11Rik | -0.595 | 3.685  | -2.594 | 0.019 | 0.111 | -3.421 |
| Vmn2r29       | -0.319 | 2.291  | -2.594 | 0.019 | 0.111 | -3.421 |
| Prmt3         | 0.378  | 7.883  | 2.594  | 0.019 | 0.111 | -3.421 |
| Fads6         | -1.114 | 5.452  | -2.594 | 0.019 | 0.111 | -3.422 |
| Tstd2         | 0.363  | 7.454  | 2.594  | 0.019 | 0.111 | -3.423 |
| A030007N12Rik | 1.159  | 3.586  | 2.593  | 0.019 | 0.111 | -3.423 |
| 4930466I24Rik | -0.488 | 3.370  | -2.593 | 0.019 | 0.111 | -3.424 |
| Dos           | -0.513 | 5.304  | -2.592 | 0.019 | 0.111 | -3.425 |
| Ppp1r12c      | -0.324 | 5.170  | -2.592 | 0.019 | 0.111 | -3.425 |
| Foxh1         | -0.606 | 7.039  | -2.592 | 0.019 | 0.111 | -3.425 |
| Zfp81         | -0.312 | 2.454  | -2.592 | 0.019 | 0.111 | -3.425 |
| Dcdc2a        | -0.525 | 5.159  | -2.591 | 0.019 | 0.112 | -3.427 |
| Cts6          | -0.300 | 2.433  | -2.591 | 0.019 | 0.112 | -3.428 |
| C330022C24Rik | -0.373 | 4.341  | -2.590 | 0.019 | 0.112 | -3.429 |
| Usp171a       | -0.438 | 2.800  | -2.590 | 0.019 | 0.112 | -3.430 |
| Trappc9       | -0.413 | 4.063  | -2.590 | 0.019 | 0.112 | -3.430 |
| Gpr146        | -0.536 | 4.716  | -2.589 | 0.019 | 0.112 | -3.431 |
| Arsj          | -0.372 | 2.570  | -2.589 | 0.019 | 0.112 | -3.431 |
| Rhd           | -0.390 | 4.436  | -2.589 | 0.019 | 0.112 | -3.432 |
| B3gnt2        | -1.218 | 6.543  | -2.589 | 0.019 | 0.112 | -3.432 |
| Aqp6          | -0.315 | 4.513  | -2.589 | 0.019 | 0.112 | -3.432 |
| Rab8b         | 0.944  | 6.849  | 2.588  | 0.019 | 0.112 | -3.432 |
| AI854517      | -0.340 | 3.057  | -2.588 | 0.019 | 0.112 | -3.433 |
| Bcl7a         | -0.388 | 6.469  | -2.588 | 0.019 | 0.112 | -3.434 |
| C730036E19Rik | -0.298 | 2.196  | -2.587 | 0.019 | 0.112 | -3.434 |
| Ehmt1         | 0.331  | 8.858  | 2.587  | 0.019 | 0.112 | -3.435 |
| 1700084C06Rik | -0.276 | 2.791  | -2.587 | 0.019 | 0.112 | -3.435 |

|               |        |        |        |       |       |        |
|---------------|--------|--------|--------|-------|-------|--------|
| Nceh1         | -0.590 | 5.794  | -2.586 | 0.019 | 0.112 | -3.436 |
| Arhgap24      | -1.235 | 7.112  | -2.586 | 0.019 | 0.112 | -3.437 |
| 4631402F24Rik | -0.414 | 3.594  | -2.586 | 0.019 | 0.112 | -3.437 |
| Chic2         | 0.605  | 9.198  | 2.586  | 0.019 | 0.112 | -3.438 |
| 4732460I02Rik | -0.408 | 3.957  | -2.585 | 0.019 | 0.112 | -3.438 |
| 1700113P08Rik | -0.273 | 2.538  | -2.585 | 0.019 | 0.112 | -3.440 |
| LOC102638940  | -0.401 | 3.968  | -2.585 | 0.019 | 0.112 | -3.440 |
| Zdhhc1        | -0.421 | 5.163  | -2.585 | 0.019 | 0.112 | -3.440 |
| I120          | -0.452 | 4.752  | -2.584 | 0.019 | 0.112 | -3.440 |
| Acss2         | 0.509  | 8.012  | 2.584  | 0.019 | 0.112 | -3.440 |
| Paics         | -0.459 | 10.125 | -2.584 | 0.019 | 0.112 | -3.440 |
| AW495222      | -0.515 | 3.732  | -2.584 | 0.019 | 0.112 | -3.441 |
| Cyp7a1        | -0.325 | 2.996  | -2.584 | 0.019 | 0.112 | -3.441 |
| Eif4a1        | 0.701  | 10.767 | 2.584  | 0.019 | 0.113 | -3.441 |
| Ganab         | 0.386  | 8.681  | 2.583  | 0.019 | 0.113 | -3.442 |
| Fbxo34        | 0.483  | 8.193  | 2.583  | 0.019 | 0.113 | -3.443 |
| 2310045N14Rik | -0.337 | 2.620  | -2.582 | 0.019 | 0.113 | -3.444 |
| Pla2g7        | 1.502  | 4.760  | 2.582  | 0.019 | 0.113 | -3.444 |
| Skiv21        | 0.622  | 7.204  | 2.582  | 0.019 | 0.113 | -3.444 |
| Ubtf          | 0.312  | 8.183  | 2.582  | 0.019 | 0.113 | -3.444 |
| C78704        | -0.518 | 2.948  | -2.582 | 0.019 | 0.113 | -3.444 |
| Snx15         | -0.355 | 7.940  | -2.582 | 0.019 | 0.113 | -3.444 |
| 1110050P16Rik | -0.452 | 3.675  | -2.582 | 0.019 | 0.113 | -3.445 |
| Cbfb          | 0.452  | 9.582  | 2.581  | 0.019 | 0.113 | -3.446 |
| Man2a1        | -0.338 | 9.799  | -2.581 | 0.019 | 0.113 | -3.447 |
| Car9          | -0.833 | 10.430 | -2.581 | 0.019 | 0.113 | -3.447 |
| Gm17580       | -0.369 | 3.833  | -2.581 | 0.019 | 0.113 | -3.447 |
| Fgf9          | -0.386 | 4.012  | -2.581 | 0.019 | 0.113 | -3.447 |
| Tex15         | -1.119 | 4.505  | -2.581 | 0.019 | 0.113 | -3.447 |
| A4galt        | -0.390 | 3.573  | -2.580 | 0.019 | 0.113 | -3.448 |
| Lim2          | -0.345 | 5.198  | -2.580 | 0.019 | 0.113 | -3.448 |
| Crybb1        | -0.493 | 4.987  | -2.580 | 0.019 | 0.113 | -3.449 |
| Tas2r105      | -0.276 | 2.514  | -2.580 | 0.019 | 0.113 | -3.449 |
| Stxbp2        | 0.322  | 8.000  | 2.580  | 0.019 | 0.113 | -3.449 |
| LOC102638722  | -0.271 | 2.678  | -2.580 | 0.019 | 0.113 | -3.449 |
| Art3          | -0.476 | 2.701  | -2.579 | 0.019 | 0.113 | -3.450 |
| Aldh3a1       | -1.022 | 10.403 | -2.579 | 0.019 | 0.113 | -3.450 |
| Scfd2         | -0.444 | 5.421  | -2.579 | 0.019 | 0.113 | -3.450 |
| Evala         | 1.471  | 5.087  | 2.579  | 0.019 | 0.113 | -3.451 |
| Mtx2          | -0.496 | 8.729  | -2.578 | 0.019 | 0.113 | -3.451 |
| 4933406K04Rik | -0.462 | 3.789  | -2.578 | 0.019 | 0.113 | -3.453 |
| Arhgef17      | -0.398 | 4.133  | -2.577 | 0.019 | 0.113 | -3.453 |
| Ano9          | 1.273  | 6.839  | 2.576  | 0.019 | 0.113 | -3.455 |
| Synj2bp       | -0.293 | 7.828  | -2.576 | 0.019 | 0.113 | -3.455 |
| Fam210b       | -0.522 | 7.483  | -2.576 | 0.019 | 0.113 | -3.456 |
| Nr1i2         | 0.630  | 5.480  | 2.576  | 0.019 | 0.113 | -3.457 |
| Sntb2         | -0.480 | 4.955  | -2.576 | 0.019 | 0.113 | -3.457 |
| Bcl6          | 0.949  | 6.050  | 2.575  | 0.019 | 0.114 | -3.458 |
| Gm20765       | -0.482 | 3.840  | -2.575 | 0.019 | 0.114 | -3.458 |
| 2900076A13Rik | -0.362 | 3.442  | -2.575 | 0.020 | 0.114 | -3.459 |

|               |        |        |        |       |       |        |
|---------------|--------|--------|--------|-------|-------|--------|
| Nrp2          | 0.478  | 6.731  | 2.574  | 0.020 | 0.114 | -3.459 |
| E330037M01Rik | -0.512 | 2.857  | -2.574 | 0.020 | 0.114 | -3.459 |
| Kif13b        | -0.375 | 3.109  | -2.574 | 0.020 | 0.114 | -3.460 |
| Defa21        | -0.338 | 2.919  | -2.574 | 0.020 | 0.114 | -3.460 |
| Bche          | -0.424 | 4.515  | -2.574 | 0.020 | 0.114 | -3.460 |
| Elfn1         | -0.527 | 3.421  | -2.574 | 0.020 | 0.114 | -3.460 |
| Dpp9          | 0.384  | 7.765  | 2.573  | 0.020 | 0.114 | -3.461 |
| 1110051M20Rik | -0.401 | 6.657  | -2.573 | 0.020 | 0.114 | -3.462 |
| Baat          | -0.378 | 4.863  | -2.572 | 0.020 | 0.114 | -3.462 |
| Pde4dip       | -0.583 | 4.548  | -2.571 | 0.020 | 0.114 | -3.465 |
| AA675344      | -0.334 | 2.940  | -2.571 | 0.020 | 0.114 | -3.465 |
| Cd36          | -2.803 | 6.404  | -2.571 | 0.020 | 0.114 | -3.465 |
| 4930507D10Rik | -0.525 | 3.692  | -2.570 | 0.020 | 0.114 | -3.466 |
| Cryba1        | -0.455 | 3.183  | -2.570 | 0.020 | 0.114 | -3.467 |
| Lcmt1         | -0.516 | 7.325  | -2.570 | 0.020 | 0.114 | -3.467 |
| Fech          | -0.595 | 6.859  | -2.570 | 0.020 | 0.114 | -3.467 |
| Ddx4          | -0.349 | 2.372  | -2.569 | 0.020 | 0.114 | -3.468 |
| Rasgrp3       | -2.344 | 6.030  | -2.569 | 0.020 | 0.114 | -3.469 |
| AA536887      | -0.429 | 4.912  | -2.569 | 0.020 | 0.114 | -3.470 |
| Wdr77         | 0.577  | 8.708  | 2.568  | 0.020 | 0.115 | -3.471 |
| Cdx1          | -0.454 | 3.538  | -2.568 | 0.020 | 0.115 | -3.472 |
| Uroc1         | -0.668 | 6.902  | -2.567 | 0.020 | 0.115 | -3.472 |
| 2410012E07Rik | -0.394 | 4.019  | -2.567 | 0.020 | 0.115 | -3.472 |
| Stk11         | -0.343 | 8.142  | -2.567 | 0.020 | 0.115 | -3.473 |
| 9330199F22Rik | -0.951 | 4.703  | -2.567 | 0.020 | 0.115 | -3.473 |
| Gdel          | -0.477 | 10.742 | -2.567 | 0.020 | 0.115 | -3.473 |
| Col13a1       | -0.401 | 3.707  | -2.567 | 0.020 | 0.115 | -3.473 |
| Act17b        | -0.541 | 5.496  | -2.566 | 0.020 | 0.115 | -3.474 |
| Traf3         | 0.436  | 7.926  | 2.566  | 0.020 | 0.115 | -3.475 |
| Crot          | -0.522 | 4.975  | -2.566 | 0.020 | 0.115 | -3.475 |
| Lrp3          | -0.476 | 4.981  | -2.566 | 0.020 | 0.115 | -3.475 |
| Cuedc2        | -0.491 | 5.179  | -2.565 | 0.020 | 0.115 | -3.476 |
| Gm7694        | -0.611 | 4.933  | -2.565 | 0.020 | 0.115 | -3.477 |
| Gpn3          | -0.357 | 7.346  | -2.565 | 0.020 | 0.115 | -3.477 |
| Srebf1        | 0.318  | 9.122  | 2.564  | 0.020 | 0.115 | -3.478 |
| Gkn3          | 1.766  | 12.206 | 2.564  | 0.020 | 0.115 | -3.478 |
| Gpr137b-ps    | -0.415 | 5.840  | -2.563 | 0.020 | 0.115 | -3.480 |
| Igf2          | -0.432 | 3.439  | -2.563 | 0.020 | 0.115 | -3.480 |
| Inpp5j        | -0.293 | 9.046  | -2.563 | 0.020 | 0.115 | -3.480 |
| Gmpr          | -1.747 | 6.082  | -2.563 | 0.020 | 0.115 | -3.481 |
| Slcola5       | -0.368 | 3.058  | -2.561 | 0.020 | 0.115 | -3.483 |
| Ext1          | 0.486  | 6.913  | 2.561  | 0.020 | 0.115 | -3.483 |
| Adrb3         | -0.371 | 3.707  | -2.561 | 0.020 | 0.115 | -3.484 |
| Cts1          | 0.745  | 10.211 | 2.561  | 0.020 | 0.115 | -3.484 |
| Fbxl20        | -0.436 | 7.099  | -2.561 | 0.020 | 0.115 | -3.484 |
| Kans111       | 0.477  | 3.522  | 2.561  | 0.020 | 0.115 | -3.484 |
| Srrm4         | -0.454 | 3.878  | -2.561 | 0.020 | 0.115 | -3.485 |
| Cadm3         | -0.315 | 4.815  | -2.560 | 0.020 | 0.116 | -3.486 |
| BC025920      | -0.334 | 3.150  | -2.560 | 0.020 | 0.116 | -3.487 |
| Serpib6e      | 0.520  | 6.599  | 2.560  | 0.020 | 0.116 | -3.487 |

|               |        |        |        |       |       |        |
|---------------|--------|--------|--------|-------|-------|--------|
| Ppp1r26       | -0.561 | 5.194  | -2.560 | 0.020 | 0.116 | -3.487 |
| Pex5          | -0.553 | 5.677  | -2.559 | 0.020 | 0.116 | -3.487 |
| D730045A05Rik | -0.323 | 4.226  | -2.559 | 0.020 | 0.116 | -3.487 |
| Chmp4b        | 0.585  | 9.652  | 2.559  | 0.020 | 0.116 | -3.487 |
| Tmem174       | -0.317 | 2.955  | -2.559 | 0.020 | 0.116 | -3.487 |
| Gm12606       | -0.482 | 2.967  | -2.559 | 0.020 | 0.116 | -3.487 |
| Lhx1          | -0.410 | 3.010  | -2.559 | 0.020 | 0.116 | -3.488 |
| D17892        | -0.346 | 4.006  | -2.559 | 0.020 | 0.116 | -3.488 |
| 4933424C09Rik | -0.268 | 2.775  | -2.559 | 0.020 | 0.116 | -3.488 |
| Acot1         | 0.593  | 5.098  | 2.558  | 0.020 | 0.116 | -3.489 |
| 5730457N03Rik | -0.292 | 2.857  | -2.558 | 0.020 | 0.116 | -3.489 |
| Doc2a         | -0.535 | 3.955  | -2.558 | 0.020 | 0.116 | -3.489 |
| Smarcc1       | 0.383  | 8.830  | 2.558  | 0.020 | 0.116 | -3.490 |
| Tshr          | -0.491 | 2.818  | -2.558 | 0.020 | 0.116 | -3.490 |
| Add2          | -0.390 | 3.944  | -2.557 | 0.020 | 0.116 | -3.491 |
| Acpl          | -0.461 | 8.568  | -2.557 | 0.020 | 0.116 | -3.492 |
| AW046200      | -0.488 | 4.030  | -2.556 | 0.020 | 0.116 | -3.492 |
| Meg3          | -0.425 | 5.600  | -2.556 | 0.020 | 0.116 | -3.493 |
| Tectb         | -0.453 | 3.726  | -2.555 | 0.020 | 0.116 | -3.494 |
| 8430432A02Rik | -0.387 | 2.753  | -2.555 | 0.020 | 0.116 | -3.495 |
| AI467606      | 1.007  | 7.375  | 2.555  | 0.020 | 0.116 | -3.495 |
| Mrgprb1       | -0.317 | 2.349  | -2.554 | 0.020 | 0.116 | -3.497 |
| D5Ertd798e    | 1.567  | 6.845  | 2.554  | 0.020 | 0.116 | -3.497 |
| G6pd2         | -0.288 | 2.453  | -2.553 | 0.020 | 0.116 | -3.499 |
| Gfra2         | -0.457 | 4.451  | -2.553 | 0.020 | 0.116 | -3.499 |
| Myct1         | -0.328 | 2.520  | -2.552 | 0.020 | 0.117 | -3.500 |
| Zfp292        | 0.639  | 5.206  | 2.552  | 0.020 | 0.117 | -3.500 |
| Cldn23        | 1.678  | 6.063  | 2.552  | 0.020 | 0.117 | -3.501 |
| Zfp810        | -0.589 | 5.853  | -2.551 | 0.020 | 0.117 | -3.503 |
| C230011H18Rik | -0.417 | 3.184  | -2.551 | 0.020 | 0.117 | -3.503 |
| Ndufs5        | -0.552 | 9.938  | -2.551 | 0.020 | 0.117 | -3.503 |
| Carm1         | 0.369  | 8.299  | 2.550  | 0.021 | 0.117 | -3.505 |
| Fkbp5         | -1.167 | 7.266  | -2.550 | 0.021 | 0.117 | -3.505 |
| Tuba3b        | -0.533 | 4.451  | -2.549 | 0.021 | 0.117 | -3.506 |
| Wnt6          | -0.372 | 5.072  | -2.549 | 0.021 | 0.117 | -3.506 |
| Aldh7a1       | -0.376 | 2.946  | -2.549 | 0.021 | 0.117 | -3.507 |
| Trim43a       | -0.405 | 4.028  | -2.549 | 0.021 | 0.117 | -3.507 |
| Aen           | 0.489  | 7.156  | 2.549  | 0.021 | 0.117 | -3.507 |
| Sult1c2       | -0.416 | 11.726 | -2.548 | 0.021 | 0.117 | -3.509 |
| 4930564B18Rik | -0.354 | 3.896  | -2.548 | 0.021 | 0.117 | -3.509 |
| A930015G24Rik | -0.401 | 2.892  | -2.547 | 0.021 | 0.117 | -3.509 |
| 2810001G20Rik | -0.459 | 5.622  | -2.547 | 0.021 | 0.117 | -3.510 |
| LOC102636808  | -0.294 | 2.646  | -2.547 | 0.021 | 0.117 | -3.510 |
| LOC100862433  | 0.280  | 12.642 | 2.547  | 0.021 | 0.117 | -3.511 |
| Acot8         | 0.462  | 8.219  | 2.546  | 0.021 | 0.117 | -3.512 |
| Lect1         | -0.370 | 2.997  | -2.546 | 0.021 | 0.117 | -3.512 |
| Trem2         | -0.447 | 3.787  | -2.546 | 0.021 | 0.118 | -3.513 |
| Prtn3         | -0.346 | 5.222  | -2.545 | 0.021 | 0.118 | -3.513 |
| Akr1c1        | -0.370 | 3.419  | -2.545 | 0.021 | 0.118 | -3.514 |
| Edem1         | -0.401 | 9.125  | -2.545 | 0.021 | 0.118 | -3.514 |

|               |        |        |        |       |       |        |
|---------------|--------|--------|--------|-------|-------|--------|
| Gjc3          | -0.474 | 3.280  | -2.545 | 0.021 | 0.118 | -3.515 |
| Slc16a1       | 0.573  | 10.041 | 2.545  | 0.021 | 0.118 | -3.515 |
| Myc           | 0.897  | 7.677  | 2.543  | 0.021 | 0.118 | -3.517 |
| Adam11        | -0.297 | 3.208  | -2.543 | 0.021 | 0.118 | -3.517 |
| Bhlha15       | -0.494 | 4.339  | -2.543 | 0.021 | 0.118 | -3.517 |
| Iqcf3         | -0.334 | 3.621  | -2.543 | 0.021 | 0.118 | -3.517 |
| Dtx3l         | 1.176  | 8.364  | 2.543  | 0.021 | 0.118 | -3.518 |
| Nmnat3        | -0.432 | 5.075  | -2.543 | 0.021 | 0.118 | -3.518 |
| 4833424015Rik | -0.384 | 3.513  | -2.543 | 0.021 | 0.118 | -3.518 |
| Amph          | -0.304 | 2.606  | -2.543 | 0.021 | 0.118 | -3.518 |
| Cand2         | -0.574 | 5.118  | -2.543 | 0.021 | 0.118 | -3.518 |
| Ndufs8        | -0.536 | 11.439 | -2.543 | 0.021 | 0.118 | -3.518 |
| Shc2          | -0.345 | 3.966  | -2.542 | 0.021 | 0.118 | -3.519 |
| Trmt13        | 0.394  | 4.751  | 2.541  | 0.021 | 0.118 | -3.521 |
| Prex1         | 0.390  | 6.266  | 2.541  | 0.021 | 0.118 | -3.521 |
| Actn1         | 1.296  | 6.332  | 2.541  | 0.021 | 0.118 | -3.521 |
| Lbx1          | -0.414 | 6.394  | -2.541 | 0.021 | 0.118 | -3.522 |
| 1700123L14Rik | -0.376 | 2.941  | -2.541 | 0.021 | 0.118 | -3.522 |
| Upk3b1        | -0.489 | 4.643  | -2.540 | 0.021 | 0.118 | -3.522 |
| Tmem180       | -0.326 | 6.074  | -2.540 | 0.021 | 0.118 | -3.523 |
| Zbtb18        | 0.427  | 8.776  | 2.540  | 0.021 | 0.118 | -3.523 |
| Zfp518b       | -0.437 | 3.647  | -2.540 | 0.021 | 0.118 | -3.524 |
| 4930423K06Rik | -0.624 | 4.048  | -2.539 | 0.021 | 0.118 | -3.525 |
| Cam1          | 0.306  | 7.762  | 2.539  | 0.021 | 0.118 | -3.525 |
| Tmem238       | -0.411 | 9.707  | -2.539 | 0.021 | 0.118 | -3.525 |
| 9430006E15Rik | -0.288 | 3.699  | -2.539 | 0.021 | 0.118 | -3.526 |
| Rnase6        | 0.426  | 4.489  | 2.539  | 0.021 | 0.118 | -3.526 |
| Tgfbrap1      | -0.328 | 7.336  | -2.539 | 0.021 | 0.118 | -3.526 |
| Krt26         | -0.442 | 3.170  | -2.538 | 0.021 | 0.118 | -3.528 |
| Smchd1        | 0.431  | 7.978  | 2.537  | 0.021 | 0.118 | -3.528 |
| Ak1           | -1.992 | 6.856  | -2.537 | 0.021 | 0.118 | -3.528 |
| 1700028E10Rik | -0.422 | 4.309  | -2.537 | 0.021 | 0.118 | -3.529 |
| Gm10309       | -0.348 | 3.471  | -2.537 | 0.021 | 0.118 | -3.529 |
| Jarid2        | 0.332  | 6.887  | 2.537  | 0.021 | 0.118 | -3.529 |
| 8-Mar         | -0.369 | 7.780  | -2.537 | 0.021 | 0.118 | -3.530 |
| Nhlrc3        | -0.347 | 6.982  | -2.536 | 0.021 | 0.118 | -3.530 |
| Adprh11       | -0.384 | 4.329  | -2.536 | 0.021 | 0.118 | -3.530 |
| Phlda1        | 1.004  | 10.377 | 2.536  | 0.021 | 0.118 | -3.530 |
| Ras12-9       | -0.391 | 2.873  | -2.536 | 0.021 | 0.118 | -3.530 |
| Car7          | -0.339 | 4.589  | -2.536 | 0.021 | 0.118 | -3.531 |
| Celf4         | 0.893  | 5.531  | 2.536  | 0.021 | 0.118 | -3.531 |
| Atox1         | -0.403 | 9.521  | -2.536 | 0.021 | 0.118 | -3.532 |
| Emc4          | -0.391 | 9.193  | -2.536 | 0.021 | 0.118 | -3.532 |
| C81600        | -0.484 | 3.667  | -2.536 | 0.021 | 0.118 | -3.532 |
| Diras1        | -0.365 | 3.903  | -2.535 | 0.021 | 0.118 | -3.532 |
| Fam71e1       | -0.438 | 3.584  | -2.535 | 0.021 | 0.118 | -3.532 |
| Eroll         | 0.457  | 9.905  | 2.535  | 0.021 | 0.118 | -3.532 |
| Gm11397       | -0.334 | 3.298  | -2.535 | 0.021 | 0.118 | -3.533 |
| Lgr6          | -0.425 | 5.292  | -2.535 | 0.021 | 0.118 | -3.533 |
| 4930456G14Rik | -0.368 | 4.044  | -2.535 | 0.021 | 0.118 | -3.534 |

|               |        |        |        |       |       |        |
|---------------|--------|--------|--------|-------|-------|--------|
| LOC102634103  | -0.335 | 3.906  | -2.534 | 0.021 | 0.118 | -3.534 |
| Slc39a3       | -0.373 | 6.890  | -2.534 | 0.021 | 0.118 | -3.534 |
| Gm9796        | -0.431 | 4.339  | -2.534 | 0.021 | 0.118 | -3.534 |
| Gm21571       | 0.246  | 12.225 | 2.534  | 0.021 | 0.118 | -3.534 |
| Gp49a         | 1.751  | 6.663  | 2.534  | 0.021 | 0.118 | -3.534 |
| Ablim3        | -0.425 | 3.229  | -2.534 | 0.021 | 0.118 | -3.534 |
| Slc35g1       | -0.594 | 10.230 | -2.534 | 0.021 | 0.119 | -3.535 |
| Celf5         | -0.364 | 2.822  | -2.534 | 0.021 | 0.119 | -3.535 |
| Zfp397        | -0.351 | 5.394  | -2.534 | 0.021 | 0.119 | -3.535 |
| Itpkc         | 0.502  | 6.995  | 2.534  | 0.021 | 0.119 | -3.535 |
| D7Ert715e     | 0.808  | 3.264  | 2.534  | 0.021 | 0.119 | -3.535 |
| Cdk1          | 0.616  | 8.508  | 2.532  | 0.021 | 0.119 | -3.537 |
| 2010107G12Rik | 0.681  | 5.466  | 2.532  | 0.021 | 0.119 | -3.539 |
| Tmem184a      | -0.551 | 9.054  | -2.531 | 0.021 | 0.119 | -3.539 |
| Kalrn         | 0.410  | 7.592  | 2.531  | 0.021 | 0.119 | -3.540 |
| Nop2          | 0.549  | 8.061  | 2.531  | 0.021 | 0.119 | -3.541 |
| Cwc22         | 0.416  | 4.970  | 2.530  | 0.021 | 0.119 | -3.541 |
| Gm10094       | -0.359 | 8.235  | -2.530 | 0.021 | 0.119 | -3.542 |
| Gm12042       | -0.419 | 3.682  | -2.530 | 0.021 | 0.119 | -3.542 |
| Olfr672       | -0.382 | 3.781  | -2.529 | 0.021 | 0.119 | -3.543 |
| Soga1         | -0.440 | 5.961  | -2.529 | 0.021 | 0.119 | -3.544 |
| Cep164        | -0.407 | 4.312  | -2.529 | 0.021 | 0.119 | -3.544 |
| Stac          | -0.309 | 3.149  | -2.529 | 0.021 | 0.119 | -3.545 |
| 5430434G16Rik | 1.582  | 5.589  | 2.528  | 0.021 | 0.120 | -3.547 |
| 4930563E22Rik | -0.497 | 6.231  | -2.527 | 0.022 | 0.120 | -3.547 |
| 4930570E03Rik | -0.339 | 2.976  | -2.527 | 0.022 | 0.120 | -3.548 |
| Tmod4         | -0.321 | 3.408  | -2.527 | 0.022 | 0.120 | -3.548 |
| 1700008J07Rik | -0.489 | 5.088  | -2.527 | 0.022 | 0.120 | -3.548 |
| 9-Mar         | -0.367 | 3.917  | -2.527 | 0.022 | 0.120 | -3.549 |
| Atxn21        | 0.600  | 7.479  | 2.526  | 0.022 | 0.120 | -3.549 |
| Rit2          | -0.377 | 2.689  | -2.526 | 0.022 | 0.120 | -3.549 |
| Slfn11        | -0.438 | 4.800  | -2.526 | 0.022 | 0.120 | -3.550 |
| Hpse          | 0.635  | 7.346  | 2.526  | 0.022 | 0.120 | -3.550 |
| Capn11        | -0.357 | 5.518  | -2.526 | 0.022 | 0.120 | -3.550 |
| Kifc1         | 0.657  | 5.036  | 2.525  | 0.022 | 0.120 | -3.551 |
| Klhdc2        | -0.747 | 6.444  | -2.525 | 0.022 | 0.120 | -3.551 |
| 4930558K02Rik | -0.320 | 4.558  | -2.525 | 0.022 | 0.120 | -3.551 |
| Polr1b        | 0.539  | 6.985  | 2.524  | 0.022 | 0.120 | -3.553 |
| Eif2a         | 0.628  | 6.697  | 2.524  | 0.022 | 0.120 | -3.554 |
| Col24a1       | -0.293 | 2.203  | -2.524 | 0.022 | 0.120 | -3.554 |
| Twist2        | -0.396 | 4.024  | -2.524 | 0.022 | 0.120 | -3.554 |
| Rnf4          | 0.330  | 8.564  | 2.523  | 0.022 | 0.120 | -3.555 |
| Zfp229        | -0.651 | 4.495  | -2.522 | 0.022 | 0.120 | -3.557 |
| Zfp827        | -0.537 | 6.731  | -2.522 | 0.022 | 0.120 | -3.557 |
| Sgsm3         | -0.340 | 7.950  | -2.522 | 0.022 | 0.120 | -3.558 |
| Tomm22        | 0.313  | 9.317  | 2.521  | 0.022 | 0.121 | -3.559 |
| Ap3s2         | 0.505  | 6.284  | 2.521  | 0.022 | 0.121 | -3.559 |
| Bok           | 0.381  | 8.659  | 2.520  | 0.022 | 0.121 | -3.561 |
| Psme3         | 0.741  | 7.339  | 2.520  | 0.022 | 0.121 | -3.561 |
| Slc4a9        | -0.435 | 3.432  | -2.519 | 0.022 | 0.121 | -3.563 |



|               |        |        |        |       |       |        |
|---------------|--------|--------|--------|-------|-------|--------|
| Cdy12         | -0.313 | 3.274  | -2.518 | 0.022 | 0.121 | -3.564 |
| Rff1          | -0.346 | 4.365  | -2.518 | 0.022 | 0.121 | -3.564 |
| 2410021H03Rik | -0.320 | 2.925  | -2.518 | 0.022 | 0.121 | -3.565 |
| 1810021M19Rik | -0.518 | 4.667  | -2.518 | 0.022 | 0.121 | -3.565 |
| Psm3          | 1.420  | 5.479  | 2.518  | 0.022 | 0.121 | -3.565 |
| Tpd5212       | 0.334  | 7.956  | 2.517  | 0.022 | 0.121 | -3.565 |
| Bicc1         | 0.419  | 6.618  | 2.517  | 0.022 | 0.121 | -3.566 |
| Pibf1         | -0.338 | 2.637  | -2.517 | 0.022 | 0.121 | -3.566 |
| Cyp4f13       | -0.485 | 6.021  | -2.517 | 0.022 | 0.121 | -3.566 |
| Gga1          | 0.415  | 7.910  | 2.517  | 0.022 | 0.121 | -3.567 |
| D730002M21Rik | -0.440 | 3.896  | -2.517 | 0.022 | 0.121 | -3.567 |
| Ppmln         | -0.350 | 4.591  | -2.517 | 0.022 | 0.121 | -3.567 |
| Wfdc17        | 0.752  | 6.086  | 2.517  | 0.022 | 0.121 | -3.567 |
| Man2a2        | 0.402  | 5.842  | 2.516  | 0.022 | 0.121 | -3.568 |
| Fam204a       | -0.408 | 3.004  | -2.516 | 0.022 | 0.121 | -3.569 |
| Arnt          | 0.302  | 7.061  | 2.515  | 0.022 | 0.121 | -3.569 |
| Gm4665        | -0.340 | 2.811  | -2.515 | 0.022 | 0.121 | -3.570 |
| Cfh           | 1.276  | 4.623  | 2.514  | 0.022 | 0.122 | -3.572 |
| Fndc5         | -0.511 | 4.179  | -2.514 | 0.022 | 0.122 | -3.572 |
| Cep83os       | -0.449 | 5.327  | -2.514 | 0.022 | 0.122 | -3.573 |
| Icam1         | 1.894  | 6.104  | 2.513  | 0.022 | 0.122 | -3.573 |
| Rora          | -0.575 | 5.486  | -2.513 | 0.022 | 0.122 | -3.573 |
| Txnrd2        | -0.637 | 5.897  | -2.513 | 0.022 | 0.122 | -3.573 |
| Cdon          | -0.314 | 3.779  | -2.513 | 0.022 | 0.122 | -3.574 |
| Plcd4         | -0.310 | 3.453  | -2.512 | 0.022 | 0.122 | -3.575 |
| D12Ert247e    | -0.313 | 2.479  | -2.512 | 0.022 | 0.122 | -3.576 |
| Mark3         | 0.368  | 7.969  | 2.512  | 0.022 | 0.122 | -3.576 |
| Matn3         | -0.325 | 3.424  | -2.512 | 0.022 | 0.122 | -3.576 |
| Micalc1       | -0.608 | 5.789  | -2.511 | 0.022 | 0.122 | -3.577 |
| Atp6v0e2      | -0.499 | 3.987  | -2.511 | 0.022 | 0.122 | -3.577 |
| Ptges         | -0.476 | 4.355  | -2.511 | 0.022 | 0.122 | -3.577 |
| Rfwd3         | 0.390  | 8.054  | 2.509  | 0.022 | 0.122 | -3.581 |
| Piga          | 0.666  | 7.094  | 2.509  | 0.022 | 0.122 | -3.582 |
| Safb2         | 0.720  | 6.703  | 2.509  | 0.022 | 0.123 | -3.582 |
| Dand5         | -0.451 | 4.942  | -2.508 | 0.022 | 0.123 | -3.584 |
| Aloxe3        | -0.412 | 5.987  | -2.508 | 0.022 | 0.123 | -3.584 |
| Egr3          | -0.359 | 6.070  | -2.507 | 0.022 | 0.123 | -3.585 |
| 4930445B03Rik | -0.379 | 3.506  | -2.507 | 0.022 | 0.123 | -3.586 |
| Cdk2          | 0.535  | 7.464  | 2.506  | 0.022 | 0.123 | -3.586 |
| Fam196a       | -0.436 | 5.852  | -2.506 | 0.022 | 0.123 | -3.586 |
| Tpmt          | -0.343 | 5.158  | -2.506 | 0.022 | 0.123 | -3.587 |
| C79657        | -0.282 | 3.499  | -2.506 | 0.022 | 0.123 | -3.587 |
| Prkab2        | -0.416 | 6.436  | -2.506 | 0.022 | 0.123 | -3.587 |
| Fzd7          | -0.380 | 4.937  | -2.506 | 0.022 | 0.123 | -3.587 |
| Celsr2        | -0.419 | 5.736  | -2.505 | 0.022 | 0.123 | -3.588 |
| AW049021      | -0.327 | 3.794  | -2.505 | 0.023 | 0.123 | -3.588 |
| Trak2         | -0.448 | 4.286  | -2.505 | 0.023 | 0.123 | -3.588 |
| Slc38a7       | -0.352 | 6.547  | -2.505 | 0.023 | 0.123 | -3.588 |
| 9530018H14Rik | -0.443 | 3.914  | -2.505 | 0.023 | 0.123 | -3.589 |
| Hspa8         | 0.572  | 10.860 | 2.504  | 0.023 | 0.123 | -3.590 |

|               |        |        |        |       |       |        |
|---------------|--------|--------|--------|-------|-------|--------|
| Vpreb3        | -0.425 | 5.349  | -2.504 | 0.023 | 0.123 | -3.590 |
| Kcne2         | -2.347 | 8.444  | -2.503 | 0.023 | 0.123 | -3.592 |
| Ltbp4         | -0.489 | 6.337  | -2.503 | 0.023 | 0.123 | -3.592 |
| 1700064N11Rik | -0.374 | 4.077  | -2.503 | 0.023 | 0.123 | -3.593 |
| Bbs2          | -0.357 | 5.092  | -2.502 | 0.023 | 0.123 | -3.593 |
| Tspan8        | 0.542  | 9.808  | 2.502  | 0.023 | 0.124 | -3.595 |
| Bcl11b        | 1.103  | 5.865  | 2.502  | 0.023 | 0.124 | -3.595 |
| Hs3st2        | -0.443 | 3.180  | -2.501 | 0.023 | 0.124 | -3.596 |
| 9530067L11Rik | -0.482 | 3.098  | -2.500 | 0.023 | 0.124 | -3.597 |
| AI849538      | -0.413 | 2.576  | -2.500 | 0.023 | 0.124 | -3.597 |
| Dcplb         | -0.349 | 5.716  | -2.500 | 0.023 | 0.124 | -3.597 |
| Rgp1          | 0.446  | 8.368  | 2.499  | 0.023 | 0.124 | -3.599 |
| Fkbp10        | -0.572 | 4.792  | -2.499 | 0.023 | 0.124 | -3.600 |
| 1700013G24Rik | -0.342 | 3.349  | -2.499 | 0.023 | 0.124 | -3.600 |
| Ctdnep1       | 0.471  | 8.395  | 2.499  | 0.023 | 0.124 | -3.601 |
| Tmsb10        | 0.480  | 10.573 | 2.498  | 0.023 | 0.124 | -3.602 |
| Prdx4         | 0.822  | 7.749  | 2.498  | 0.023 | 0.124 | -3.603 |
| Cd3eap        | 0.362  | 5.312  | 2.497  | 0.023 | 0.124 | -3.603 |
| Tmem177       | -0.479 | 4.919  | -2.497 | 0.023 | 0.124 | -3.603 |
| Gm16499       | -0.366 | 3.830  | -2.497 | 0.023 | 0.124 | -3.604 |
| P2rx4         | 0.474  | 9.360  | 2.497  | 0.023 | 0.124 | -3.604 |
| Gm10627       | -0.444 | 5.748  | -2.497 | 0.023 | 0.124 | -3.604 |
| Gipr          | -0.313 | 3.473  | -2.496 | 0.023 | 0.124 | -3.605 |
| 4921534H16Rik | -0.349 | 2.959  | -2.496 | 0.023 | 0.124 | -3.606 |
| Zfp112        | -0.433 | 5.375  | -2.495 | 0.023 | 0.125 | -3.606 |
| Pcsk1n        | -0.525 | 5.164  | -2.495 | 0.023 | 0.125 | -3.607 |
| Gpr64         | -1.055 | 6.400  | -2.495 | 0.023 | 0.125 | -3.608 |
| Susd4         | -0.492 | 3.422  | -2.495 | 0.023 | 0.125 | -3.608 |
| Zfp551        | -0.515 | 4.514  | -2.495 | 0.023 | 0.125 | -3.608 |
| Gas212        | -0.389 | 3.676  | -2.494 | 0.023 | 0.125 | -3.608 |
| Plod3         | 0.309  | 8.230  | 2.494  | 0.023 | 0.125 | -3.609 |
| Bzw1          | 0.349  | 9.199  | 2.494  | 0.023 | 0.125 | -3.610 |
| LOC552882     | 0.462  | 3.253  | 2.494  | 0.023 | 0.125 | -3.610 |
| 4931428A05Rik | -0.416 | 4.472  | -2.493 | 0.023 | 0.125 | -3.610 |
| Ifitm10       | -0.526 | 4.435  | -2.493 | 0.023 | 0.125 | -3.611 |
| Dnajb3        | -0.432 | 3.309  | -2.493 | 0.023 | 0.125 | -3.611 |
| Nek3          | -0.384 | 6.167  | -2.493 | 0.023 | 0.125 | -3.611 |
| Ptpn5         | -0.456 | 3.305  | -2.493 | 0.023 | 0.125 | -3.612 |
| 6-Sep         | -0.802 | 4.049  | -2.492 | 0.023 | 0.125 | -3.613 |
| Ooep          | -0.309 | 6.772  | -2.492 | 0.023 | 0.125 | -3.613 |
| Ccdc166       | -0.266 | 4.949  | -2.492 | 0.023 | 0.125 | -3.613 |
| Tusc3         | -0.532 | 7.751  | -2.491 | 0.023 | 0.125 | -3.615 |
| C80165        | -0.311 | 2.594  | -2.491 | 0.023 | 0.125 | -3.615 |
| Gsx2          | -0.416 | 3.921  | -2.490 | 0.023 | 0.125 | -3.616 |
| Gm6793        | 0.281  | 10.473 | 2.490  | 0.023 | 0.125 | -3.617 |
| Plcb1         | -0.383 | 4.215  | -2.489 | 0.023 | 0.125 | -3.618 |
| Plagl2        | 0.870  | 6.612  | 2.489  | 0.023 | 0.125 | -3.618 |
| 8430434A19Rik | -0.328 | 2.357  | -2.489 | 0.023 | 0.126 | -3.619 |
| Msantd3       | -0.336 | 3.008  | -2.489 | 0.023 | 0.126 | -3.619 |
| Hist3h2a      | -0.353 | 6.726  | -2.488 | 0.023 | 0.126 | -3.620 |

|               |        |        |        |       |       |        |
|---------------|--------|--------|--------|-------|-------|--------|
| Unc5c         | -0.363 | 2.667  | -2.488 | 0.023 | 0.126 | -3.621 |
| Irak1         | 0.406  | 8.495  | 2.488  | 0.023 | 0.126 | -3.621 |
| Nmt2          | -0.491 | 4.866  | -2.487 | 0.023 | 0.126 | -3.621 |
| Itga4         | -0.302 | 4.875  | -2.487 | 0.023 | 0.126 | -3.622 |
| H2-Q6         | 3.441  | 9.594  | 2.487  | 0.023 | 0.126 | -3.623 |
| Atp5g1        | -0.559 | 10.859 | -2.487 | 0.023 | 0.126 | -3.623 |
| LOC102632764  | -0.422 | 3.138  | -2.486 | 0.023 | 0.126 | -3.623 |
| Abcf1         | 0.292  | 8.951  | 2.486  | 0.023 | 0.126 | -3.623 |
| Ccl8          | 1.545  | 6.484  | 2.486  | 0.023 | 0.126 | -3.623 |
| Cd46          | -0.463 | 5.147  | -2.486 | 0.023 | 0.126 | -3.624 |
| Pianp         | -0.461 | 5.015  | -2.486 | 0.023 | 0.126 | -3.624 |
| 2900069G24Rik | -0.310 | 2.996  | -2.486 | 0.023 | 0.126 | -3.624 |
| Uqcrb         | -0.297 | 10.920 | -2.486 | 0.023 | 0.126 | -3.625 |
| AU021880      | -0.413 | 2.499  | -2.485 | 0.023 | 0.126 | -3.625 |
| Gm13999       | -0.436 | 3.187  | -2.485 | 0.023 | 0.126 | -3.625 |
| Depdc1b       | 0.654  | 5.316  | 2.485  | 0.023 | 0.126 | -3.626 |
| Tmem126b      | -0.357 | 4.696  | -2.485 | 0.023 | 0.126 | -3.626 |
| Dpysl5        | -0.302 | 3.060  | -2.484 | 0.023 | 0.126 | -3.627 |
| 1700111N16Rik | -0.363 | 2.725  | -2.484 | 0.023 | 0.126 | -3.627 |
| Dexi          | 0.402  | 7.042  | 2.484  | 0.024 | 0.126 | -3.628 |
| Tfcp2         | 0.305  | 5.549  | 2.483  | 0.024 | 0.126 | -3.630 |
| Hspb6         | -0.673 | 5.456  | -2.483 | 0.024 | 0.126 | -3.630 |
| Slc35a5       | -0.696 | 5.168  | -2.482 | 0.024 | 0.126 | -3.631 |
| Mphosph8      | -0.403 | 6.393  | -2.482 | 0.024 | 0.126 | -3.631 |
| Tmem97        | -0.734 | 7.649  | -2.482 | 0.024 | 0.126 | -3.631 |
| AW555355      | 1.004  | 7.056  | 2.482  | 0.024 | 0.126 | -3.632 |
| C920009B18Rik | -0.443 | 3.503  | -2.482 | 0.024 | 0.126 | -3.632 |
| 1700018C11Rik | -0.286 | 3.506  | -2.481 | 0.024 | 0.127 | -3.633 |
| A430033K04Rik | -0.475 | 4.321  | -2.481 | 0.024 | 0.127 | -3.634 |
| 1810019N24Rik | -0.336 | 2.603  | -2.481 | 0.024 | 0.127 | -3.634 |
| Tc11b1        | -0.370 | 5.626  | -2.480 | 0.024 | 0.127 | -3.635 |
| Ckb           | -2.136 | 9.478  | -2.480 | 0.024 | 0.127 | -3.635 |
| Pnn           | 0.788  | 7.908  | 2.479  | 0.024 | 0.127 | -3.636 |
| Gdap10        | 1.576  | 6.588  | 2.479  | 0.024 | 0.127 | -3.637 |
| Aktip         | -0.457 | 6.851  | -2.479 | 0.024 | 0.127 | -3.637 |
| Ifnal         | -0.365 | 5.450  | -2.479 | 0.024 | 0.127 | -3.638 |
| Psmg3         | 0.425  | 8.277  | 2.479  | 0.024 | 0.127 | -3.638 |
| Actrt3        | -0.300 | 2.971  | -2.478 | 0.024 | 0.127 | -3.638 |
| Kank1         | -1.723 | 6.140  | -2.478 | 0.024 | 0.127 | -3.639 |
| Gch1          | 1.053  | 8.836  | 2.477  | 0.024 | 0.127 | -3.640 |
| 5830468F06Rik | -0.396 | 3.419  | -2.477 | 0.024 | 0.127 | -3.641 |
| Snx6          | -1.108 | 10.162 | -2.477 | 0.024 | 0.127 | -3.641 |
| Chtf18        | 0.588  | 4.336  | 2.476  | 0.024 | 0.127 | -3.642 |
| C87490        | -0.453 | 3.762  | -2.476 | 0.024 | 0.127 | -3.642 |
| Reep6         | 0.565  | 6.734  | 2.476  | 0.024 | 0.127 | -3.642 |
| Ccdc32        | -0.696 | 7.545  | -2.476 | 0.024 | 0.127 | -3.642 |
| Rpl27a        | -0.254 | 3.370  | -2.476 | 0.024 | 0.127 | -3.642 |
| Gm5082        | -0.430 | 2.951  | -2.476 | 0.024 | 0.127 | -3.642 |
| Palm          | -0.475 | 5.582  | -2.476 | 0.024 | 0.127 | -3.643 |
| Arl8a         | -0.464 | 6.466  | -2.475 | 0.024 | 0.127 | -3.643 |

|               |        |        |        |       |       |        |
|---------------|--------|--------|--------|-------|-------|--------|
| Stard10       | -0.309 | 11.632 | -2.475 | 0.024 | 0.127 | -3.643 |
| Zfp784        | -0.452 | 4.864  | -2.475 | 0.024 | 0.127 | -3.643 |
| 2310005A03Rik | -0.365 | 3.417  | -2.474 | 0.024 | 0.128 | -3.645 |
| Neurod2       | -0.465 | 5.370  | -2.473 | 0.024 | 0.128 | -3.647 |
| 1700012L04Rik | -0.414 | 3.935  | -2.473 | 0.024 | 0.128 | -3.648 |
| Gm10266       | -0.283 | 4.702  | -2.473 | 0.024 | 0.128 | -3.649 |
| Socs7         | -0.379 | 4.743  | -2.472 | 0.024 | 0.128 | -3.649 |
| Stau2         | -0.977 | 6.713  | -2.472 | 0.024 | 0.128 | -3.651 |
| Ttc4          | 0.363  | 6.709  | 2.471  | 0.024 | 0.128 | -3.652 |
| Mpl           | -0.602 | 4.190  | -2.471 | 0.024 | 0.128 | -3.652 |
| Rcn1          | 1.181  | 5.570  | 2.470  | 0.024 | 0.128 | -3.653 |
| Usp36         | 0.481  | 7.265  | 2.470  | 0.024 | 0.128 | -3.653 |
| Rbm41         | -0.402 | 3.922  | -2.470 | 0.024 | 0.128 | -3.653 |
| Podx12        | -0.421 | 3.276  | -2.470 | 0.024 | 0.128 | -3.654 |
| Rbl1          | 0.612  | 6.834  | 2.470  | 0.024 | 0.128 | -3.654 |
| Krtap19-9b    | -0.431 | 3.892  | -2.470 | 0.024 | 0.128 | -3.654 |
| Fasl          | -0.297 | 3.089  | -2.469 | 0.024 | 0.128 | -3.655 |
| Col8a1        | -0.548 | 4.003  | -2.469 | 0.024 | 0.128 | -3.655 |
| Psmc8         | -0.421 | 9.834  | -2.469 | 0.024 | 0.129 | -3.656 |
| Sdccag8       | -0.473 | 2.779  | -2.469 | 0.024 | 0.129 | -3.656 |
| Pthlh         | -2.010 | 5.285  | -2.468 | 0.024 | 0.129 | -3.656 |
| Phactr2       | -0.258 | 3.253  | -2.468 | 0.024 | 0.129 | -3.657 |
| Nme5          | -0.408 | 4.498  | -2.467 | 0.024 | 0.129 | -3.659 |
| Rbmx11        | 0.494  | 8.540  | 2.466  | 0.024 | 0.129 | -3.660 |
| Tubb2a        | 0.648  | 8.851  | 2.466  | 0.024 | 0.129 | -3.661 |
| Zfp69         | -0.433 | 3.412  | -2.466 | 0.024 | 0.129 | -3.662 |
| AU022751      | -0.403 | 3.884  | -2.465 | 0.024 | 0.129 | -3.662 |
| Nxf1          | 0.618  | 8.503  | 2.465  | 0.024 | 0.129 | -3.663 |
| 0610040J01Rik | 0.269  | 9.906  | 2.465  | 0.024 | 0.129 | -3.664 |
| Prss41        | -0.411 | 3.780  | -2.464 | 0.024 | 0.129 | -3.664 |
| Mast2         | 0.259  | 8.325  | 2.464  | 0.024 | 0.129 | -3.665 |
| 1700129C05Rik | -0.284 | 2.857  | -2.464 | 0.024 | 0.129 | -3.665 |
| Magea7-ps     | -0.526 | 5.374  | -2.464 | 0.025 | 0.129 | -3.665 |
| Rdh7          | -2.031 | 8.125  | -2.464 | 0.025 | 0.129 | -3.665 |
| Tac2          | -0.349 | 3.138  | -2.463 | 0.025 | 0.129 | -3.666 |
| Idh1          | 0.619  | 9.929  | 2.463  | 0.025 | 0.130 | -3.667 |
| Sdpr          | -1.107 | 5.957  | -2.462 | 0.025 | 0.130 | -3.667 |
| Gm9947        | -0.364 | 4.294  | -2.462 | 0.025 | 0.130 | -3.668 |
| Minos1        | -0.466 | 10.072 | -2.462 | 0.025 | 0.130 | -3.668 |
| Snrnp27       | 0.341  | 9.259  | 2.462  | 0.025 | 0.130 | -3.669 |
| Ppara         | -1.177 | 5.220  | -2.462 | 0.025 | 0.130 | -3.669 |
| Mrgprg        | -0.378 | 3.900  | -2.462 | 0.025 | 0.130 | -3.669 |
| Galm          | -0.407 | 8.913  | -2.462 | 0.025 | 0.130 | -3.669 |
| Rras2         | 0.281  | 8.560  | 2.462  | 0.025 | 0.130 | -3.669 |
| Akr1c19       | -0.836 | 8.918  | -2.462 | 0.025 | 0.130 | -3.669 |
| Tmprss2       | -0.437 | 10.499 | -2.462 | 0.025 | 0.130 | -3.669 |
| Gm13262       | -0.307 | 3.645  | -2.461 | 0.025 | 0.130 | -3.669 |
| Wdr90         | 0.480  | 5.456  | 2.461  | 0.025 | 0.130 | -3.669 |
| Ankrd23       | -0.336 | 4.961  | -2.461 | 0.025 | 0.130 | -3.670 |
| Il25          | -0.425 | 3.231  | -2.461 | 0.025 | 0.130 | -3.670 |

|               |        |       |        |       |       |        |
|---------------|--------|-------|--------|-------|-------|--------|
| Atp9a         | 0.278  | 8.555 | 2.461  | 0.025 | 0.130 | -3.671 |
| Oas1f         | -0.412 | 5.013 | -2.461 | 0.025 | 0.130 | -3.671 |
| A630033H20Rik | -0.281 | 2.459 | -2.460 | 0.025 | 0.130 | -3.671 |
| Rasa2         | 0.666  | 8.153 | 2.460  | 0.025 | 0.130 | -3.671 |
| Hdac6         | -0.269 | 7.093 | -2.460 | 0.025 | 0.130 | -3.672 |
| Zfp384        | 0.468  | 8.435 | 2.460  | 0.025 | 0.130 | -3.672 |
| 2310005E17Rik | -0.299 | 2.822 | -2.460 | 0.025 | 0.130 | -3.673 |
| Rusc1         | -0.367 | 5.660 | -2.459 | 0.025 | 0.130 | -3.673 |
| Gpllr         | -0.381 | 3.744 | -2.459 | 0.025 | 0.130 | -3.673 |
| Dmbx1         | -0.410 | 4.502 | -2.459 | 0.025 | 0.130 | -3.673 |
| Fbxo3         | -0.476 | 8.034 | -2.459 | 0.025 | 0.130 | -3.673 |
| Deptor        | -0.375 | 5.814 | -2.459 | 0.025 | 0.130 | -3.674 |
| Plekha4       | -0.363 | 5.716 | -2.459 | 0.025 | 0.130 | -3.674 |
| Cst9          | -0.457 | 3.082 | -2.459 | 0.025 | 0.130 | -3.674 |
| Gm9748        | -0.403 | 3.043 | -2.459 | 0.025 | 0.130 | -3.674 |
| Il13          | -0.370 | 4.023 | -2.458 | 0.025 | 0.130 | -3.676 |
| Add3          | -0.456 | 7.019 | -2.458 | 0.025 | 0.130 | -3.676 |
| AU022320      | -0.381 | 3.898 | -2.458 | 0.025 | 0.130 | -3.677 |
| 4930458K08Rik | -0.314 | 3.262 | -2.457 | 0.025 | 0.130 | -3.677 |
| Yrdc          | 0.550  | 7.865 | 2.457  | 0.025 | 0.130 | -3.678 |
| Zscan10       | -0.390 | 4.993 | -2.457 | 0.025 | 0.130 | -3.678 |
| Runx2         | 0.681  | 5.254 | 2.457  | 0.025 | 0.130 | -3.678 |
| Fam71a        | -0.402 | 3.902 | -2.456 | 0.025 | 0.130 | -3.679 |
| Lrfn4         | 0.452  | 5.955 | 2.456  | 0.025 | 0.130 | -3.679 |
| Slc44a3       | -0.538 | 8.305 | -2.456 | 0.025 | 0.130 | -3.679 |
| Stard13       | -0.520 | 5.795 | -2.456 | 0.025 | 0.130 | -3.680 |
| Dock5         | 0.425  | 6.582 | 2.456  | 0.025 | 0.130 | -3.680 |
| Sftpb         | -0.389 | 5.678 | -2.456 | 0.025 | 0.130 | -3.680 |
| LOC552874     | -0.396 | 4.881 | -2.456 | 0.025 | 0.130 | -3.680 |
| Raplgapos     | -0.871 | 6.303 | -2.455 | 0.025 | 0.130 | -3.681 |
| Pygl          | 0.899  | 5.640 | 2.455  | 0.025 | 0.130 | -3.682 |
| 4930549C15Rik | -0.360 | 4.079 | -2.455 | 0.025 | 0.130 | -3.682 |
| Prr22         | -0.395 | 5.183 | -2.454 | 0.025 | 0.130 | -3.683 |
| St8sia5       | -0.467 | 4.874 | -2.454 | 0.025 | 0.130 | -3.683 |
| Cd200r3       | -0.416 | 2.593 | -2.454 | 0.025 | 0.130 | -3.684 |
| Pdzk1         | -0.458 | 4.038 | -2.454 | 0.025 | 0.130 | -3.684 |
| Bpnt1         | -0.714 | 8.375 | -2.454 | 0.025 | 0.130 | -3.684 |
| Slc50a1       | 0.413  | 9.100 | 2.454  | 0.025 | 0.130 | -3.684 |
| Alas2         | -0.656 | 5.537 | -2.454 | 0.025 | 0.130 | -3.684 |
| Akap2         | -1.166 | 6.141 | -2.453 | 0.025 | 0.130 | -3.684 |
| 2900078I11Rik | -0.449 | 2.991 | -2.453 | 0.025 | 0.131 | -3.685 |
| 4930533B18Rik | -0.309 | 2.407 | -2.453 | 0.025 | 0.131 | -3.685 |
| Lym2          | -0.445 | 6.541 | -2.453 | 0.025 | 0.131 | -3.686 |
| Aebp2         | -0.500 | 3.904 | -2.452 | 0.025 | 0.131 | -3.686 |
| 4930431F12Rik | -0.340 | 2.601 | -2.452 | 0.025 | 0.131 | -3.686 |
| Gm26801       | 0.598  | 4.406 | 2.452  | 0.025 | 0.131 | -3.687 |
| Maf           | 0.367  | 4.278 | 2.452  | 0.025 | 0.131 | -3.687 |
| C230040D14    | -0.297 | 3.610 | -2.452 | 0.025 | 0.131 | -3.687 |
| BC003965      | 0.274  | 8.932 | 2.451  | 0.025 | 0.131 | -3.688 |
| 2010012005Rik | 0.425  | 6.966 | 2.451  | 0.025 | 0.131 | -3.688 |

|               |        |       |        |       |       |        |
|---------------|--------|-------|--------|-------|-------|--------|
| Nadsyn1       | -0.332 | 6.635 | -2.451 | 0.025 | 0.131 | -3.688 |
| 4921530L21Rik | -0.322 | 2.876 | -2.451 | 0.025 | 0.131 | -3.690 |
| Mast4         | -0.368 | 4.189 | -2.450 | 0.025 | 0.131 | -3.690 |
| Mdgal         | -0.327 | 4.575 | -2.450 | 0.025 | 0.131 | -3.690 |
| Mup4          | -0.276 | 2.513 | -2.450 | 0.025 | 0.131 | -3.690 |
| Mpo           | -0.428 | 3.471 | -2.450 | 0.025 | 0.131 | -3.691 |
| Amer3         | -0.377 | 4.431 | -2.450 | 0.025 | 0.131 | -3.691 |
| Gmppb         | 0.663  | 8.637 | 2.450  | 0.025 | 0.131 | -3.691 |
| Zfp143        | 0.287  | 6.094 | 2.449  | 0.025 | 0.131 | -3.692 |
| Ino80dos      | -0.284 | 2.395 | -2.449 | 0.025 | 0.131 | -3.693 |
| Wdfy4         | 0.845  | 5.079 | 2.448  | 0.025 | 0.131 | -3.694 |
| 4921532D01Rik | -0.331 | 5.655 | -2.448 | 0.025 | 0.131 | -3.695 |
| Klra21        | -0.469 | 5.905 | -2.447 | 0.025 | 0.131 | -3.695 |
| 1810062018Rik | -0.358 | 3.772 | -2.447 | 0.025 | 0.131 | -3.696 |
| Cstf3         | 0.467  | 7.583 | 2.447  | 0.025 | 0.131 | -3.696 |
| Zfp28         | -0.369 | 2.941 | -2.447 | 0.025 | 0.131 | -3.696 |
| Hcrtr2        | -0.456 | 4.775 | -2.447 | 0.025 | 0.131 | -3.696 |
| Col9a2        | -0.498 | 3.432 | -2.447 | 0.025 | 0.131 | -3.696 |
| Fzd6          | -0.444 | 5.203 | -2.446 | 0.025 | 0.131 | -3.697 |
| Fbx14         | -0.338 | 6.949 | -2.446 | 0.025 | 0.131 | -3.698 |
| Hhat          | -0.307 | 4.912 | -2.446 | 0.025 | 0.131 | -3.698 |
| Tubb2b        | 0.541  | 3.480 | 2.446  | 0.025 | 0.131 | -3.698 |
| AW047730      | -0.348 | 5.040 | -2.445 | 0.025 | 0.132 | -3.699 |
| Ltbp3         | -0.507 | 5.625 | -2.445 | 0.025 | 0.132 | -3.699 |
| Cdkn2aipn1    | 0.431  | 7.781 | 2.445  | 0.025 | 0.132 | -3.700 |
| Ltb           | 1.326  | 5.094 | 2.445  | 0.025 | 0.132 | -3.700 |
| LOC100041483  | -0.495 | 9.383 | -2.444 | 0.026 | 0.132 | -3.701 |
| A130006I12Rik | -0.458 | 3.530 | -2.444 | 0.026 | 0.132 | -3.702 |
| H2-Q2         | 1.602  | 4.657 | 2.444  | 0.026 | 0.132 | -3.702 |
| Tmem33        | -0.688 | 9.157 | -2.443 | 0.026 | 0.132 | -3.703 |
| 4933413I22Rik | -0.322 | 3.430 | -2.443 | 0.026 | 0.132 | -3.703 |
| Fbxo2         | -0.315 | 3.259 | -2.443 | 0.026 | 0.132 | -3.703 |
| Lins          | -0.426 | 3.893 | -2.443 | 0.026 | 0.132 | -3.704 |
| Tmem101       | 0.432  | 5.852 | 2.443  | 0.026 | 0.132 | -3.704 |
| Trpc4         | -0.288 | 2.488 | -2.443 | 0.026 | 0.132 | -3.704 |
| Lyg2          | -0.324 | 3.603 | -2.442 | 0.026 | 0.132 | -3.704 |
| Zfp961        | -0.480 | 4.943 | -2.442 | 0.026 | 0.132 | -3.705 |
| Atpla3        | -0.354 | 3.555 | -2.442 | 0.026 | 0.132 | -3.705 |
| Slc30a3       | -0.337 | 6.769 | -2.441 | 0.026 | 0.132 | -3.707 |
| Tt1113        | -0.417 | 4.056 | -2.441 | 0.026 | 0.132 | -3.707 |
| Dnmt3b        | 0.309  | 5.031 | 2.441  | 0.026 | 0.132 | -3.707 |
| 9530068E07Rik | 0.301  | 9.231 | 2.441  | 0.026 | 0.132 | -3.708 |
| H13           | 0.375  | 9.559 | 2.440  | 0.026 | 0.132 | -3.708 |
| Angpt12       | -0.516 | 4.326 | -2.440 | 0.026 | 0.132 | -3.708 |
| Palld1        | 1.527  | 6.115 | 2.440  | 0.026 | 0.132 | -3.708 |
| Proz          | -0.398 | 3.768 | -2.440 | 0.026 | 0.132 | -3.709 |
| Rnf207        | -0.379 | 3.002 | -2.439 | 0.026 | 0.132 | -3.710 |
| Meal          | -0.260 | 9.025 | -2.439 | 0.026 | 0.132 | -3.710 |
| 1700084F23Rik | -0.350 | 3.094 | -2.439 | 0.026 | 0.132 | -3.710 |
| Rgs9bp        | -0.355 | 2.898 | -2.439 | 0.026 | 0.132 | -3.711 |

|               |        |        |        |       |       |        |
|---------------|--------|--------|--------|-------|-------|--------|
| Sp4           | -0.773 | 5.589  | -2.439 | 0.026 | 0.132 | -3.711 |
| Zbtb40        | 0.487  | 5.991  | 2.439  | 0.026 | 0.132 | -3.712 |
| Atp6v1c2      | -0.334 | 3.832  | -2.438 | 0.026 | 0.133 | -3.712 |
| Xab2          | 0.399  | 6.893  | 2.438  | 0.026 | 0.133 | -3.712 |
| 5830435N06Rik | -0.386 | 3.278  | -2.438 | 0.026 | 0.133 | -3.713 |
| 2410018L13Rik | -0.428 | 4.773  | -2.438 | 0.026 | 0.133 | -3.713 |
| Ctsz          | 0.755  | 10.314 | 2.437  | 0.026 | 0.133 | -3.714 |
| 8030431A06Rik | -0.388 | 6.829  | -2.437 | 0.026 | 0.133 | -3.714 |
| Dkk4          | -0.336 | 3.327  | -2.437 | 0.026 | 0.133 | -3.714 |
| D530037P16Rik | -0.365 | 2.652  | -2.437 | 0.026 | 0.133 | -3.714 |
| Ubl3          | -0.612 | 9.954  | -2.437 | 0.026 | 0.133 | -3.714 |
| B230214009Rik | 2.083  | 6.881  | 2.437  | 0.026 | 0.133 | -3.715 |
| Ptprn2        | -0.521 | 4.302  | -2.436 | 0.026 | 0.133 | -3.715 |
| AI594671      | -0.274 | 2.213  | -2.436 | 0.026 | 0.133 | -3.716 |
| Mrps21        | -0.440 | 9.448  | -2.436 | 0.026 | 0.133 | -3.717 |
| Hinfp         | -0.638 | 4.821  | -2.436 | 0.026 | 0.133 | -3.717 |
| Fhl1          | -0.911 | 11.289 | -2.435 | 0.026 | 0.133 | -3.717 |
| Kcnv2         | -0.457 | 2.674  | -2.435 | 0.026 | 0.133 | -3.717 |
| Dmrt3         | -0.362 | 2.653  | -2.435 | 0.026 | 0.133 | -3.719 |
| Gm715         | -0.451 | 3.187  | -2.435 | 0.026 | 0.133 | -3.719 |
| Cenpb         | -0.290 | 7.886  | -2.435 | 0.026 | 0.133 | -3.719 |
| Hspa14        | 0.436  | 4.943  | 2.434  | 0.026 | 0.133 | -3.720 |
| Pfas          | 0.697  | 6.116  | 2.434  | 0.026 | 0.133 | -3.720 |
| LOC102636304  | -0.496 | 5.179  | -2.434 | 0.026 | 0.133 | -3.720 |
| Rfesd         | -0.608 | 5.826  | -2.434 | 0.026 | 0.133 | -3.721 |
| Prpf3         | 0.421  | 6.881  | 2.433  | 0.026 | 0.133 | -3.721 |
| Efemp2        | 0.494  | 5.494  | 2.432  | 0.026 | 0.134 | -3.724 |
| Hbb-bh1       | -0.422 | 3.450  | -2.432 | 0.026 | 0.134 | -3.724 |
| Cmip          | 0.518  | 7.287  | 2.431  | 0.026 | 0.134 | -3.725 |
| Sft2d1        | 0.386  | 9.212  | 2.431  | 0.026 | 0.134 | -3.725 |
| Rhox13        | -0.350 | 2.351  | -2.431 | 0.026 | 0.134 | -3.725 |
| A030005K14Rik | -0.339 | 4.582  | -2.431 | 0.026 | 0.134 | -3.725 |
| Stmn4         | -0.338 | 4.737  | -2.431 | 0.026 | 0.134 | -3.726 |
| Npc111        | 1.390  | 6.791  | 2.431  | 0.026 | 0.134 | -3.726 |
| Slc39a1       | 0.367  | 8.588  | 2.431  | 0.026 | 0.134 | -3.726 |
| Zfp553        | -0.331 | 4.332  | -2.430 | 0.026 | 0.134 | -3.726 |
| 4930557B21Rik | -0.373 | 3.336  | -2.430 | 0.026 | 0.134 | -3.727 |
| 4933407I08Rik | -0.285 | 2.940  | -2.430 | 0.026 | 0.134 | -3.727 |
| Srsf10        | 0.568  | 6.941  | 2.429  | 0.026 | 0.134 | -3.728 |
| 4930500A05Rik | -0.358 | 2.948  | -2.429 | 0.026 | 0.134 | -3.730 |
| A330050F15Rik | -0.322 | 4.346  | -2.428 | 0.026 | 0.134 | -3.730 |
| Trim47        | -0.883 | 6.090  | -2.428 | 0.026 | 0.134 | -3.730 |
| Nr3c1         | -0.962 | 4.753  | -2.428 | 0.026 | 0.134 | -3.730 |
| Themis2       | 0.761  | 5.055  | 2.428  | 0.026 | 0.134 | -3.731 |
| Egfr          | 0.669  | 7.518  | 2.428  | 0.026 | 0.134 | -3.731 |
| Stard8        | -0.614 | 5.167  | -2.428 | 0.026 | 0.134 | -3.731 |
| Zbpl          | 1.771  | 7.128  | 2.427  | 0.026 | 0.134 | -3.733 |
| Cwc15         | -0.326 | 8.495  | -2.427 | 0.026 | 0.134 | -3.733 |
| D9Erttd338e   | -0.234 | 2.938  | -2.427 | 0.026 | 0.134 | -3.733 |
| Gm26673       | -0.312 | 3.901  | -2.427 | 0.026 | 0.134 | -3.733 |

|               |        |        |        |       |       |        |
|---------------|--------|--------|--------|-------|-------|--------|
| Mllt1         | -0.451 | 3.329  | -2.427 | 0.026 | 0.134 | -3.733 |
| Csflr         | 1.328  | 8.595  | 2.427  | 0.026 | 0.134 | -3.733 |
| D7Ertd443e    | -0.649 | 4.174  | -2.426 | 0.026 | 0.134 | -3.734 |
| Nlk           | -0.607 | 7.614  | -2.426 | 0.026 | 0.134 | -3.734 |
| Plekhs1       | 1.118  | 5.740  | 2.426  | 0.026 | 0.134 | -3.734 |
| Pcdh7         | -0.396 | 3.765  | -2.426 | 0.026 | 0.134 | -3.734 |
| Gpr45         | -0.313 | 4.387  | -2.426 | 0.026 | 0.134 | -3.734 |
| Sez612        | -0.661 | 4.520  | -2.426 | 0.026 | 0.134 | -3.735 |
| 4930512M02Rik | -0.271 | 2.478  | -2.425 | 0.027 | 0.134 | -3.736 |
| Nrbp1         | 0.284  | 8.074  | 2.425  | 0.027 | 0.134 | -3.737 |
| Gpx8          | -0.932 | 6.216  | -2.424 | 0.027 | 0.135 | -3.738 |
| Mrgpra2a      | -0.353 | 3.433  | -2.423 | 0.027 | 0.135 | -3.740 |
| Acsbg2        | -0.390 | 3.350  | -2.423 | 0.027 | 0.135 | -3.740 |
| Ssxb1         | -0.362 | 2.769  | -2.423 | 0.027 | 0.135 | -3.741 |
| Abcc3         | 0.298  | 10.577 | 2.422  | 0.027 | 0.135 | -3.741 |
| Fank1         | -0.480 | 5.687  | -2.422 | 0.027 | 0.135 | -3.741 |
| Lrrc51        | -0.395 | 5.381  | -2.422 | 0.027 | 0.135 | -3.741 |
| 2810047J09Rik | -0.300 | 2.467  | -2.422 | 0.027 | 0.135 | -3.742 |
| Rps6ka2       | -0.462 | 5.918  | -2.422 | 0.027 | 0.135 | -3.742 |
| Ttc3          | -0.476 | 4.583  | -2.422 | 0.027 | 0.135 | -3.742 |
| Ifna11        | -0.401 | 3.193  | -2.422 | 0.027 | 0.135 | -3.742 |
| Got1          | -0.488 | 9.892  | -2.422 | 0.027 | 0.135 | -3.743 |
| Cox7c         | 0.681  | 2.992  | 2.421  | 0.027 | 0.135 | -3.743 |
| 3010027C24Rik | -0.296 | 4.246  | -2.421 | 0.027 | 0.135 | -3.744 |
| Tepp          | -0.253 | 2.863  | -2.421 | 0.027 | 0.135 | -3.744 |
| Cmas          | 0.358  | 10.389 | 2.420  | 0.027 | 0.135 | -3.745 |
| Slco2a1       | -0.606 | 9.246  | -2.419 | 0.027 | 0.135 | -3.747 |
| Isl2          | -0.413 | 5.186  | -2.419 | 0.027 | 0.135 | -3.748 |
| Mab2111       | -0.413 | 2.871  | -2.419 | 0.027 | 0.135 | -3.748 |
| Sesn2         | -0.441 | 4.772  | -2.418 | 0.027 | 0.136 | -3.748 |
| Ctxn2         | -0.284 | 3.922  | -2.418 | 0.027 | 0.136 | -3.750 |
| Prkag3        | -0.513 | 3.489  | -2.417 | 0.027 | 0.136 | -3.750 |
| Gbp8          | 2.732  | 4.904  | 2.417  | 0.027 | 0.136 | -3.752 |
| A230038B01Rik | -0.366 | 2.568  | -2.417 | 0.027 | 0.136 | -3.752 |
| Lmx1a         | -0.376 | 4.169  | -2.416 | 0.027 | 0.136 | -3.752 |
| Prkcsb        | 0.260  | 9.375  | 2.416  | 0.027 | 0.136 | -3.752 |
| Commd6        | -0.539 | 7.964  | -2.416 | 0.027 | 0.136 | -3.753 |
| Gm17762       | -0.448 | 3.393  | -2.415 | 0.027 | 0.136 | -3.754 |
| A730008H23Rik | -0.412 | 4.341  | -2.415 | 0.027 | 0.136 | -3.755 |
| Rhoc          | 0.502  | 9.847  | 2.414  | 0.027 | 0.136 | -3.756 |
| Cf12          | -0.580 | 6.318  | -2.414 | 0.027 | 0.136 | -3.756 |
| 9330159N22Rik | -0.487 | 3.071  | -2.414 | 0.027 | 0.136 | -3.757 |
| Ermp1         | -0.856 | 10.486 | -2.413 | 0.027 | 0.137 | -3.758 |
| Spag17        | -0.263 | 2.388  | -2.413 | 0.027 | 0.137 | -3.758 |
| Oog4          | -0.337 | 2.519  | -2.413 | 0.027 | 0.137 | -3.758 |
| Kcne11        | -0.418 | 3.258  | -2.413 | 0.027 | 0.137 | -3.759 |
| AU022052      | -0.320 | 2.703  | -2.413 | 0.027 | 0.137 | -3.759 |
| D2Ertd173e    | -0.434 | 2.728  | -2.412 | 0.027 | 0.137 | -3.759 |
| 1010001I08Rik | -0.293 | 2.823  | -2.412 | 0.027 | 0.137 | -3.760 |
| Ccdc122       | 0.617  | 5.896  | 2.412  | 0.027 | 0.137 | -3.760 |



|               |        |        |        |       |       |        |
|---------------|--------|--------|--------|-------|-------|--------|
| Psme2         | 1.242  | 11.021 | 2.412  | 0.027 | 0.137 | -3.760 |
| AW112010      | 1.928  | 11.024 | 2.412  | 0.027 | 0.137 | -3.760 |
| Rnase1        | -2.091 | 7.126  | -2.412 | 0.027 | 0.137 | -3.761 |
| 4930550C17Rik | -0.366 | 5.356  | -2.411 | 0.027 | 0.137 | -3.761 |
| Filip11       | -0.810 | 8.344  | -2.411 | 0.027 | 0.137 | -3.761 |
| Cox15         | -0.465 | 7.153  | -2.411 | 0.027 | 0.137 | -3.762 |
| Dtd2          | -0.407 | 3.212  | -2.411 | 0.027 | 0.137 | -3.762 |
| Flrt2         | -0.398 | 4.263  | -2.411 | 0.027 | 0.137 | -3.762 |
| 9230118N17Rik | -0.275 | 2.946  | -2.411 | 0.027 | 0.137 | -3.763 |
| Gm17597       | -0.424 | 3.456  | -2.411 | 0.027 | 0.137 | -3.763 |
| Zfp84         | -0.281 | 4.630  | -2.410 | 0.027 | 0.137 | -3.764 |
| Zdhhc8        | -0.395 | 6.109  | -2.410 | 0.027 | 0.137 | -3.764 |
| S1fn2         | 1.780  | 7.982  | 2.410  | 0.027 | 0.137 | -3.764 |
| Tmem196       | -0.285 | 2.149  | -2.409 | 0.027 | 0.137 | -3.765 |
| 1700008P02Rik | -0.376 | 3.502  | -2.409 | 0.027 | 0.137 | -3.765 |
| Pf4           | 0.804  | 5.877  | 2.409  | 0.027 | 0.137 | -3.765 |
| Pnliprp2      | -2.348 | 7.982  | -2.409 | 0.027 | 0.137 | -3.766 |
| Muc5b         | 1.536  | 6.796  | 2.409  | 0.027 | 0.137 | -3.766 |
| Vmnlr14       | -0.271 | 2.468  | -2.409 | 0.027 | 0.137 | -3.766 |
| Prr15         | -0.429 | 2.599  | -2.409 | 0.027 | 0.137 | -3.766 |
| 6430411K18Rik | -0.366 | 3.831  | -2.408 | 0.027 | 0.137 | -3.767 |
| Coq7          | -0.342 | 8.857  | -2.408 | 0.027 | 0.137 | -3.768 |
| Atp5d         | -0.223 | 11.618 | -2.408 | 0.027 | 0.137 | -3.768 |
| Hcrtr1        | -0.304 | 2.811  | -2.407 | 0.028 | 0.137 | -3.769 |
| Nap112        | -0.333 | 2.671  | -2.407 | 0.028 | 0.137 | -3.769 |
| Aknaos        | -0.400 | 2.942  | -2.407 | 0.028 | 0.137 | -3.770 |
| Gm10575       | -0.488 | 5.751  | -2.407 | 0.028 | 0.137 | -3.770 |
| P2rx6         | -0.392 | 4.147  | -2.406 | 0.028 | 0.137 | -3.770 |
| 4930506M07Rik | 0.249  | 9.326  | 2.406  | 0.028 | 0.137 | -3.771 |
| Shisa4        | -0.562 | 6.129  | -2.406 | 0.028 | 0.137 | -3.771 |
| Ddx17         | 0.637  | 10.430 | 2.406  | 0.028 | 0.137 | -3.771 |
| Susd2         | -0.696 | 5.467  | -2.406 | 0.028 | 0.137 | -3.771 |
| 1810073G21Rik | -0.371 | 4.590  | -2.406 | 0.028 | 0.137 | -3.772 |
| 4930448E06Rik | -0.272 | 3.143  | -2.404 | 0.028 | 0.138 | -3.774 |
| Fam160b1      | -0.602 | 5.709  | -2.404 | 0.028 | 0.138 | -3.775 |
| Gm5526        | 0.225  | 12.393 | 2.403  | 0.028 | 0.138 | -3.776 |
| Dlg4          | -0.414 | 3.366  | -2.403 | 0.028 | 0.138 | -3.776 |
| 1700123M08Rik | -0.447 | 2.812  | -2.403 | 0.028 | 0.138 | -3.776 |
| Gapdhs        | -0.319 | 6.145  | -2.403 | 0.028 | 0.138 | -3.777 |
| Slc25a15      | -0.407 | 4.990  | -2.402 | 0.028 | 0.138 | -3.778 |
| 4921523P09Rik | -0.329 | 2.906  | -2.402 | 0.028 | 0.138 | -3.778 |
| Tsacc         | -0.572 | 5.089  | -2.402 | 0.028 | 0.138 | -3.779 |
| Gm11175       | -0.404 | 6.048  | -2.402 | 0.028 | 0.138 | -3.779 |
| Pstpipl       | -0.858 | 6.472  | -2.402 | 0.028 | 0.138 | -3.779 |
| Zcchc9        | 0.375  | 7.541  | 2.402  | 0.028 | 0.138 | -3.779 |
| Gm10461       | -0.373 | 2.359  | -2.401 | 0.028 | 0.138 | -3.780 |
| 4933408M05Rik | -0.235 | 2.230  | -2.401 | 0.028 | 0.138 | -3.780 |
| 4930435F05Rik | -0.270 | 5.014  | -2.401 | 0.028 | 0.138 | -3.781 |
| Gnptab        | -0.489 | 7.928  | -2.401 | 0.028 | 0.138 | -3.781 |
| Gm7367        | 0.258  | 9.837  | 2.400  | 0.028 | 0.138 | -3.781 |

|               |        |        |        |       |       |        |
|---------------|--------|--------|--------|-------|-------|--------|
| Gm12338       | -0.242 | 11.632 | -2.400 | 0.028 | 0.138 | -3.781 |
| Col6a3        | 0.741  | 6.365  | 2.400  | 0.028 | 0.138 | -3.782 |
| Erap1         | 1.055  | 7.440  | 2.400  | 0.028 | 0.138 | -3.782 |
| Fgf12         | -0.283 | 2.637  | -2.400 | 0.028 | 0.138 | -3.782 |
| LOC102634352  | 0.304  | 5.455  | 2.399  | 0.028 | 0.138 | -3.783 |
| Naf1          | 0.464  | 8.111  | 2.399  | 0.028 | 0.138 | -3.783 |
| Arf3          | -0.538 | 3.858  | -2.399 | 0.028 | 0.138 | -3.783 |
| Mfap3         | 0.250  | 8.777  | 2.399  | 0.028 | 0.138 | -3.784 |
| Nkx2-5        | -0.461 | 5.254  | -2.399 | 0.028 | 0.138 | -3.784 |
| 4930447N08Rik | -0.330 | 2.552  | -2.399 | 0.028 | 0.138 | -3.784 |
| Ctnnb1        | -0.369 | 6.895  | -2.399 | 0.028 | 0.138 | -3.784 |
| Dimt1         | 0.521  | 5.407  | 2.399  | 0.028 | 0.138 | -3.784 |
| Ephb1         | -0.399 | 4.632  | -2.399 | 0.028 | 0.138 | -3.784 |
| Tpk1          | -0.424 | 8.215  | -2.399 | 0.028 | 0.138 | -3.785 |
| Hars          | 0.436  | 7.564  | 2.399  | 0.028 | 0.138 | -3.785 |
| Gm15800       | -0.328 | 6.724  | -2.398 | 0.028 | 0.138 | -3.785 |
| 5730407005Rik | -0.299 | 2.391  | -2.398 | 0.028 | 0.138 | -3.785 |
| Saysd1        | -0.421 | 7.225  | -2.398 | 0.028 | 0.138 | -3.786 |
| BC006965      | -0.330 | 2.765  | -2.398 | 0.028 | 0.138 | -3.786 |
| E430025E21Rik | -0.409 | 9.229  | -2.398 | 0.028 | 0.139 | -3.787 |
| Ipo13         | 0.333  | 7.176  | 2.397  | 0.028 | 0.139 | -3.787 |
| Ankrd61       | -0.389 | 3.050  | -2.397 | 0.028 | 0.139 | -3.787 |
| Tmem160       | -0.630 | 8.513  | -2.397 | 0.028 | 0.139 | -3.787 |
| Atp2c1        | -0.539 | 5.102  | -2.397 | 0.028 | 0.139 | -3.788 |
| Gm19950       | -0.341 | 3.584  | -2.397 | 0.028 | 0.139 | -3.788 |
| Slc20a1       | 0.669  | 3.524  | 2.396  | 0.028 | 0.139 | -3.789 |
| Enpp5         | -0.619 | 8.787  | -2.396 | 0.028 | 0.139 | -3.789 |
| Ifna1         | -0.381 | 4.736  | -2.396 | 0.028 | 0.139 | -3.789 |
| Sowaha        | -0.290 | 3.032  | -2.396 | 0.028 | 0.139 | -3.790 |
| Tmem40        | 0.519  | 5.199  | 2.396  | 0.028 | 0.139 | -3.790 |
| AU022331      | -0.445 | 4.663  | -2.395 | 0.028 | 0.139 | -3.791 |
| Fam222a       | -0.502 | 4.427  | -2.395 | 0.028 | 0.139 | -3.792 |
| Tt1           | -0.376 | 4.193  | -2.395 | 0.028 | 0.139 | -3.792 |
| Tdrd7         | 0.561  | 9.370  | 2.394  | 0.028 | 0.139 | -3.793 |
| Gm9754        | -0.381 | 3.659  | -2.394 | 0.028 | 0.139 | -3.793 |
| Vasp          | 0.608  | 10.451 | 2.394  | 0.028 | 0.139 | -3.793 |
| 4933423P22Rik | -0.362 | 4.163  | -2.394 | 0.028 | 0.139 | -3.793 |
| Chp2          | -0.937 | 4.346  | -2.394 | 0.028 | 0.139 | -3.793 |
| C78444        | -0.329 | 4.395  | -2.394 | 0.028 | 0.139 | -3.794 |
| Prm1          | -0.383 | 5.501  | -2.393 | 0.028 | 0.139 | -3.794 |
| Esrp1         | 0.495  | 9.927  | 2.393  | 0.028 | 0.139 | -3.794 |
| 4930568D16Rik | -0.426 | 2.867  | -2.393 | 0.028 | 0.139 | -3.795 |
| Empl          | 0.531  | 8.902  | 2.393  | 0.028 | 0.139 | -3.795 |
| Tctn1         | 0.447  | 5.794  | 2.393  | 0.028 | 0.139 | -3.795 |
| Exd1          | -0.393 | 4.114  | -2.392 | 0.028 | 0.139 | -3.796 |
| Lrba          | -0.442 | 3.076  | -2.392 | 0.028 | 0.139 | -3.797 |
| Acad12        | -0.439 | 5.486  | -2.392 | 0.028 | 0.139 | -3.797 |
| Dhrs4         | 0.535  | 6.641  | 2.392  | 0.028 | 0.139 | -3.798 |
| Fblim1        | -0.900 | 8.380  | -2.391 | 0.028 | 0.139 | -3.798 |
| Zfp433        | -0.307 | 4.359  | -2.391 | 0.028 | 0.139 | -3.798 |

|               |        |        |        |       |       |        |
|---------------|--------|--------|--------|-------|-------|--------|
| Dnah1         | -0.309 | 4.352  | -2.391 | 0.028 | 0.139 | -3.798 |
| 9530077C05Rik | -0.309 | 3.010  | -2.391 | 0.028 | 0.139 | -3.799 |
| Efcab9        | -0.313 | 2.909  | -2.391 | 0.028 | 0.139 | -3.799 |
| 4930579G24Rik | 0.596  | 3.854  | 2.391  | 0.028 | 0.139 | -3.799 |
| Gtf2f1        | 0.320  | 8.528  | 2.391  | 0.028 | 0.139 | -3.799 |
| Lysmd3        | 0.541  | 8.096  | 2.390  | 0.028 | 0.140 | -3.800 |
| Exosc8        | 0.625  | 6.250  | 2.390  | 0.028 | 0.140 | -3.800 |
| 5430403G19Rik | -0.377 | 3.208  | -2.390 | 0.028 | 0.140 | -3.800 |
| Nifk          | 0.607  | 7.537  | 2.390  | 0.028 | 0.140 | -3.801 |
| Vmnlr42       | -0.422 | 3.603  | -2.390 | 0.029 | 0.140 | -3.801 |
| Urod          | -0.556 | 6.914  | -2.389 | 0.029 | 0.140 | -3.802 |
| BC024139      | -0.522 | 3.595  | -2.389 | 0.029 | 0.140 | -3.803 |
| Tlcd1         | -0.347 | 4.652  | -2.388 | 0.029 | 0.140 | -3.803 |
| Hvcn1         | 0.805  | 4.926  | 2.388  | 0.029 | 0.140 | -3.805 |
| Aldh3a2       | -0.507 | 8.910  | -2.388 | 0.029 | 0.140 | -3.805 |
| Lingo2        | -0.375 | 4.211  | -2.388 | 0.029 | 0.140 | -3.805 |
| D930028M14Rik | -0.431 | 5.106  | -2.387 | 0.029 | 0.140 | -3.806 |
| Pvalb         | -0.306 | 4.628  | -2.387 | 0.029 | 0.140 | -3.806 |
| Atrip         | -0.377 | 6.709  | -2.387 | 0.029 | 0.140 | -3.807 |
| Pes1          | 0.426  | 7.645  | 2.386  | 0.029 | 0.140 | -3.807 |
| Sptbn4        | -0.390 | 4.868  | -2.386 | 0.029 | 0.140 | -3.807 |
| Hcls1         | 1.101  | 4.741  | 2.386  | 0.029 | 0.140 | -3.807 |
| A030005L19Rik | -0.317 | 3.508  | -2.386 | 0.029 | 0.140 | -3.808 |
| Trit1         | 0.388  | 6.483  | 2.386  | 0.029 | 0.140 | -3.808 |
| Rbfox3        | -0.270 | 2.998  | -2.386 | 0.029 | 0.140 | -3.808 |
| Hlfoo         | -0.413 | 4.029  | -2.386 | 0.029 | 0.140 | -3.808 |
| Arfip1        | 0.246  | 10.245 | 2.386  | 0.029 | 0.140 | -3.808 |
| Sema6a        | -0.350 | 5.075  | -2.385 | 0.029 | 0.140 | -3.809 |
| Arhgap12      | -0.576 | 3.560  | -2.385 | 0.029 | 0.140 | -3.809 |
| Sec61b        | 0.310  | 11.137 | 2.385  | 0.029 | 0.140 | -3.809 |
| Ctps          | 0.537  | 7.825  | 2.385  | 0.029 | 0.140 | -3.810 |
| Vmnlr46       | -0.345 | 2.599  | -2.385 | 0.029 | 0.140 | -3.810 |
| C77683        | -0.412 | 5.642  | -2.385 | 0.029 | 0.140 | -3.810 |
| Sntg2         | -0.486 | 3.194  | -2.384 | 0.029 | 0.140 | -3.811 |
| Kcnc3         | -0.252 | 2.935  | -2.383 | 0.029 | 0.141 | -3.813 |
| AU041133      | -0.257 | 2.867  | -2.383 | 0.029 | 0.141 | -3.813 |
| Fgf1          | -0.647 | 4.950  | -2.382 | 0.029 | 0.141 | -3.814 |
| D2Ertd612e    | 1.213  | 6.017  | 2.382  | 0.029 | 0.141 | -3.815 |
| Cldn4         | 0.561  | 5.313  | 2.381  | 0.029 | 0.141 | -3.816 |
| Btbd6         | -0.452 | 6.437  | -2.380 | 0.029 | 0.141 | -3.818 |
| Psg21         | -0.415 | 2.708  | -2.380 | 0.029 | 0.141 | -3.818 |
| D5Ertd566e    | -0.458 | 2.778  | -2.380 | 0.029 | 0.141 | -3.818 |
| Igflr         | -0.742 | 6.051  | -2.380 | 0.029 | 0.141 | -3.818 |
| Esf1          | 0.348  | 6.783  | 2.379  | 0.029 | 0.141 | -3.820 |
| Pdgfd         | -0.610 | 2.872  | -2.379 | 0.029 | 0.141 | -3.820 |
| Pgp           | 0.300  | 8.173  | 2.379  | 0.029 | 0.141 | -3.820 |
| Dydc1         | -0.261 | 2.424  | -2.379 | 0.029 | 0.141 | -3.820 |
| Gm6415        | -0.294 | 10.047 | -2.379 | 0.029 | 0.141 | -3.820 |
| Exosc2        | 0.423  | 6.833  | 2.379  | 0.029 | 0.141 | -3.821 |
| Efcab1        | -0.443 | 4.487  | -2.379 | 0.029 | 0.141 | -3.821 |

|               |        |        |        |       |       |        |
|---------------|--------|--------|--------|-------|-------|--------|
| 4921504P13Rik | -0.324 | 3.605  | -2.378 | 0.029 | 0.141 | -3.822 |
| Sfrp1         | -0.384 | 5.506  | -2.378 | 0.029 | 0.142 | -3.822 |
| Cbr2          | 1.164  | 5.957  | 2.377  | 0.029 | 0.142 | -3.824 |
| LOC102640192  | -0.510 | 3.524  | -2.377 | 0.029 | 0.142 | -3.824 |
| Kcnc4         | -0.375 | 4.928  | -2.377 | 0.029 | 0.142 | -3.824 |
| Inpp5b        | 0.319  | 8.107  | 2.377  | 0.029 | 0.142 | -3.825 |
| Pomt2         | -0.434 | 4.551  | -2.377 | 0.029 | 0.142 | -3.825 |
| Ada           | 2.622  | 6.378  | 2.376  | 0.029 | 0.142 | -3.826 |
| Dleu2         | -0.655 | 5.275  | -2.376 | 0.029 | 0.142 | -3.826 |
| Cers2         | 0.348  | 8.950  | 2.376  | 0.029 | 0.142 | -3.827 |
| Brd8          | 0.402  | 8.527  | 2.375  | 0.029 | 0.142 | -3.827 |
| Angell1       | -0.448 | 6.242  | -2.375 | 0.029 | 0.142 | -3.827 |
| BC026585      | -0.330 | 2.708  | -2.375 | 0.029 | 0.142 | -3.827 |
| Gabrd         | -0.426 | 3.147  | -2.375 | 0.029 | 0.142 | -3.827 |
| Tfdp1         | 0.517  | 8.474  | 2.375  | 0.029 | 0.142 | -3.827 |
| Kcnn4         | 0.609  | 8.470  | 2.375  | 0.029 | 0.142 | -3.828 |
| Apba3         | -0.273 | 2.686  | -2.374 | 0.029 | 0.142 | -3.829 |
| Etohd2        | -0.392 | 4.254  | -2.374 | 0.029 | 0.142 | -3.829 |
| Mbd3l1        | -0.402 | 2.843  | -2.374 | 0.029 | 0.142 | -3.830 |
| Cypt1         | -0.274 | 2.830  | -2.374 | 0.029 | 0.142 | -3.830 |
| Klh14         | -0.313 | 2.508  | -2.374 | 0.029 | 0.142 | -3.830 |
| Slc43a3       | -0.402 | 4.060  | -2.374 | 0.029 | 0.142 | -3.830 |
| Kcng4         | -0.826 | 4.535  | -2.373 | 0.029 | 0.142 | -3.831 |
| Dnajc5g       | -0.468 | 4.386  | -2.373 | 0.029 | 0.142 | -3.831 |
| Tlr3          | 0.730  | 5.751  | 2.373  | 0.030 | 0.142 | -3.832 |
| A330094K24Rik | -0.377 | 3.003  | -2.373 | 0.030 | 0.142 | -3.832 |
| 4930594C11Rik | -0.325 | 2.757  | -2.372 | 0.030 | 0.142 | -3.833 |
| 4930448D08Rik | -0.219 | 2.303  | -2.372 | 0.030 | 0.143 | -3.834 |
| 4933413J09Rik | -0.348 | 4.925  | -2.371 | 0.030 | 0.143 | -3.834 |
| Abhd17a       | -0.300 | 9.608  | -2.371 | 0.030 | 0.143 | -3.835 |
| Cyth2         | -0.450 | 8.065  | -2.371 | 0.030 | 0.143 | -3.835 |
| Gm10051       | 0.276  | 12.999 | 2.371  | 0.030 | 0.143 | -3.835 |
| Haus6         | 0.304  | 3.543  | 2.371  | 0.030 | 0.143 | -3.835 |
| Cypl1a1       | -0.274 | 3.528  | -2.371 | 0.030 | 0.143 | -3.835 |
| 4930447F04Rik | -0.252 | 2.201  | -2.371 | 0.030 | 0.143 | -3.836 |
| Ssrp1         | 0.335  | 9.698  | 2.371  | 0.030 | 0.143 | -3.836 |
| 2900018N21Rik | -0.404 | 2.866  | -2.370 | 0.030 | 0.143 | -3.836 |
| 1700007K09Rik | -0.535 | 3.873  | -2.370 | 0.030 | 0.143 | -3.837 |
| 4930422C21Rik | -0.320 | 3.907  | -2.369 | 0.030 | 0.143 | -3.838 |
| Igbp1b        | -0.368 | 4.009  | -2.369 | 0.030 | 0.143 | -3.839 |
| 9530029012Rik | 1.312  | 8.355  | 2.369  | 0.030 | 0.143 | -3.839 |
| Gja5          | -0.352 | 3.278  | -2.368 | 0.030 | 0.143 | -3.840 |
| Rhbdd3        | 0.273  | 6.817  | 2.368  | 0.030 | 0.143 | -3.840 |
| Fchsd1        | -0.380 | 5.272  | -2.368 | 0.030 | 0.143 | -3.841 |
| Mfap1a        | 0.354  | 8.087  | 2.368  | 0.030 | 0.143 | -3.841 |
| Creg2         | -0.269 | 3.377  | -2.367 | 0.030 | 0.143 | -3.843 |
| Rspo3         | -0.439 | 4.025  | -2.366 | 0.030 | 0.143 | -3.843 |
| 5930412G12Rik | -0.351 | 5.543  | -2.366 | 0.030 | 0.143 | -3.844 |
| Lyz2          | 2.021  | 8.822  | 2.366  | 0.030 | 0.144 | -3.844 |
| Cdca71        | 0.591  | 7.599  | 2.366  | 0.030 | 0.144 | -3.844 |

|               |        |        |        |       |       |        |
|---------------|--------|--------|--------|-------|-------|--------|
| Plekhj1       | 0.535  | 6.935  | 2.365  | 0.030 | 0.144 | -3.845 |
| Ilf2          | 0.606  | 6.752  | 2.365  | 0.030 | 0.144 | -3.846 |
| Impal         | -0.269 | 10.198 | -2.365 | 0.030 | 0.144 | -3.846 |
| Aida          | 0.575  | 7.385  | 2.365  | 0.030 | 0.144 | -3.846 |
| Ddrgk1        | -0.277 | 8.797  | -2.365 | 0.030 | 0.144 | -3.846 |
| Gabra5        | -0.279 | 2.456  | -2.364 | 0.030 | 0.144 | -3.847 |
| Mbp           | -0.392 | 4.613  | -2.363 | 0.030 | 0.144 | -3.848 |
| AK030979      | -0.389 | 3.646  | -2.363 | 0.030 | 0.144 | -3.849 |
| Ikzf3         | 0.715  | 4.065  | 2.363  | 0.030 | 0.144 | -3.849 |
| Pex7          | -0.378 | 8.773  | -2.363 | 0.030 | 0.144 | -3.850 |
| Rhoj          | 0.867  | 6.932  | 2.363  | 0.030 | 0.144 | -3.850 |
| Sbf2          | -0.289 | 5.978  | -2.363 | 0.030 | 0.144 | -3.850 |
| Lysmd4        | -0.335 | 3.633  | -2.362 | 0.030 | 0.144 | -3.850 |
| Zcchc3        | -0.505 | 6.106  | -2.362 | 0.030 | 0.144 | -3.851 |
| Npr1          | -0.384 | 3.693  | -2.362 | 0.030 | 0.144 | -3.851 |
| Ciz1          | 0.290  | 7.218  | 2.362  | 0.030 | 0.144 | -3.851 |
| Ctdspl2       | -0.454 | 6.031  | -2.362 | 0.030 | 0.144 | -3.852 |
| Arhgap32      | -0.418 | 8.358  | -2.362 | 0.030 | 0.144 | -3.852 |
| Gm14137       | 0.388  | 5.349  | 2.361  | 0.030 | 0.144 | -3.853 |
| Upk3a         | -0.523 | 4.170  | -2.361 | 0.030 | 0.144 | -3.854 |
| Jadel         | -0.463 | 7.530  | -2.360 | 0.030 | 0.144 | -3.855 |
| Kctd14        | 1.159  | 7.827  | 2.360  | 0.030 | 0.144 | -3.855 |
| Spag4         | -0.432 | 4.782  | -2.360 | 0.030 | 0.144 | -3.855 |
| Slc35f1       | -0.397 | 2.644  | -2.360 | 0.030 | 0.144 | -3.855 |
| 4930480G23Rik | -0.254 | 2.364  | -2.360 | 0.030 | 0.145 | -3.855 |
| Pabpc6        | -0.324 | 2.688  | -2.360 | 0.030 | 0.145 | -3.856 |
| Utrn          | -0.817 | 3.644  | -2.359 | 0.030 | 0.145 | -3.857 |
| Morn1         | -0.334 | 4.207  | -2.359 | 0.030 | 0.145 | -3.857 |
| Fgfbp1        | -1.059 | 8.723  | -2.359 | 0.030 | 0.145 | -3.857 |
| Mageal        | -0.339 | 2.832  | -2.358 | 0.030 | 0.145 | -3.858 |
| Fggy          | -0.272 | 5.114  | -2.358 | 0.030 | 0.145 | -3.858 |
| Fa2h          | -1.303 | 10.371 | -2.358 | 0.030 | 0.145 | -3.858 |
| Ryr3          | -0.283 | 3.326  | -2.358 | 0.030 | 0.145 | -3.859 |
| Fbxo8         | -0.433 | 7.895  | -2.358 | 0.030 | 0.145 | -3.859 |
| Znrf4         | -0.411 | 4.570  | -2.358 | 0.030 | 0.145 | -3.859 |
| Olf749        | -0.261 | 3.080  | -2.358 | 0.030 | 0.145 | -3.859 |
| 4930488L21Rik | -0.401 | 3.757  | -2.358 | 0.030 | 0.145 | -3.859 |
| Pom12112      | -0.395 | 4.219  | -2.357 | 0.030 | 0.145 | -3.860 |
| Gamt          | -0.468 | 4.993  | -2.357 | 0.030 | 0.145 | -3.860 |
| Phlda2        | 0.648  | 6.291  | 2.357  | 0.030 | 0.145 | -3.860 |
| Ccdc126       | -0.396 | 5.679  | -2.357 | 0.030 | 0.145 | -3.860 |
| Cdkn1b        | -0.635 | 3.052  | -2.357 | 0.030 | 0.145 | -3.860 |
| Ctsd          | -0.341 | 10.897 | -2.356 | 0.030 | 0.145 | -3.861 |
| Iqgap3        | 0.679  | 6.590  | 2.356  | 0.030 | 0.145 | -3.861 |
| AU020147      | -0.491 | 3.892  | -2.356 | 0.031 | 0.145 | -3.862 |
| Cd37          | 0.664  | 4.564  | 2.356  | 0.031 | 0.145 | -3.862 |
| Sgcg          | -0.375 | 4.440  | -2.356 | 0.031 | 0.145 | -3.862 |
| Irgm2         | 2.493  | 8.264  | 2.356  | 0.031 | 0.145 | -3.863 |
| Slc6a18       | -0.277 | 3.246  | -2.355 | 0.031 | 0.145 | -3.863 |
| Mrgpre        | -0.324 | 4.162  | -2.355 | 0.031 | 0.145 | -3.864 |

|               |        |        |        |       |       |        |
|---------------|--------|--------|--------|-------|-------|--------|
| Tktl1         | -1.470 | 4.193  | -2.355 | 0.031 | 0.145 | -3.865 |
| Sox5os1       | -0.335 | 3.898  | -2.354 | 0.031 | 0.145 | -3.866 |
| Sim1          | -0.319 | 4.369  | -2.353 | 0.031 | 0.146 | -3.867 |
| Clpb          | -0.555 | 7.999  | -2.353 | 0.031 | 0.146 | -3.868 |
| Bhlhe40       | 0.887  | 9.016  | 2.352  | 0.031 | 0.146 | -3.868 |
| Kif2c         | -0.387 | 4.230  | -2.352 | 0.031 | 0.146 | -3.869 |
| Klrg2         | -0.429 | 6.244  | -2.352 | 0.031 | 0.146 | -3.869 |
| Grid2ip       | -0.387 | 4.689  | -2.352 | 0.031 | 0.146 | -3.870 |
| 4930414L22Rik | -0.384 | 5.317  | -2.352 | 0.031 | 0.146 | -3.870 |
| LOC102642487  | -0.380 | 3.018  | -2.352 | 0.031 | 0.146 | -3.870 |
| Clhc1         | -0.291 | 4.059  | -2.351 | 0.031 | 0.146 | -3.870 |
| Psmf1         | -0.484 | 5.715  | -2.351 | 0.031 | 0.146 | -3.870 |
| Snx8          | 0.298  | 7.404  | 2.351  | 0.031 | 0.146 | -3.871 |
| Siglece       | -0.454 | 4.787  | -2.351 | 0.031 | 0.146 | -3.871 |
| Csf2rb        | 1.335  | 4.513  | 2.351  | 0.031 | 0.146 | -3.872 |
| Maml2         | -0.319 | 3.187  | -2.350 | 0.031 | 0.146 | -3.872 |
| 4833413E03Rik | -0.327 | 4.266  | -2.350 | 0.031 | 0.146 | -3.872 |
| Slc24a3       | -0.340 | 5.479  | -2.350 | 0.031 | 0.146 | -3.872 |
| Rasgrf2       | -0.450 | 4.931  | -2.350 | 0.031 | 0.146 | -3.873 |
| 6430628N08Rik | -0.313 | 3.651  | -2.350 | 0.031 | 0.146 | -3.873 |
| Zbed6         | 0.722  | 10.494 | 2.349  | 0.031 | 0.146 | -3.874 |
| Slc9a6        | -0.564 | 9.074  | -2.349 | 0.031 | 0.146 | -3.874 |
| Cxx1a         | -0.275 | 7.423  | -2.349 | 0.031 | 0.146 | -3.874 |
| Fam160a2      | 0.369  | 7.302  | 2.349  | 0.031 | 0.146 | -3.874 |
| AU022436      | -0.311 | 2.270  | -2.349 | 0.031 | 0.146 | -3.874 |
| C030040A22Rik | -0.375 | 3.452  | -2.349 | 0.031 | 0.146 | -3.875 |
| 2810039B14Rik | -0.493 | 4.577  | -2.349 | 0.031 | 0.146 | -3.875 |
| Gata6         | -0.440 | 8.212  | -2.349 | 0.031 | 0.146 | -3.875 |
| 4933404M09Rik | -0.273 | 2.911  | -2.349 | 0.031 | 0.146 | -3.875 |
| Wfdc6a        | -0.514 | 3.862  | -2.348 | 0.031 | 0.146 | -3.876 |
| Rag1          | -0.292 | 2.436  | -2.348 | 0.031 | 0.146 | -3.877 |
| Zfp788        | -0.369 | 4.046  | -2.348 | 0.031 | 0.146 | -3.877 |
| Suclg2        | -0.492 | 8.325  | -2.347 | 0.031 | 0.146 | -3.877 |
| 2410022M11Rik | -0.252 | 3.031  | -2.347 | 0.031 | 0.146 | -3.878 |
| Arhgap36      | -0.400 | 2.691  | -2.347 | 0.031 | 0.146 | -3.878 |
| Gm14277       | 0.669  | 8.016  | 2.347  | 0.031 | 0.146 | -3.878 |
| Ghr1          | -1.443 | 11.652 | -2.347 | 0.031 | 0.146 | -3.878 |
| Tmem26        | -0.258 | 2.346  | -2.347 | 0.031 | 0.146 | -3.878 |
| Ptpn20        | -0.311 | 2.707  | -2.347 | 0.031 | 0.146 | -3.878 |
| Sctr          | -0.763 | 6.728  | -2.346 | 0.031 | 0.146 | -3.879 |
| Ankrd6        | -0.330 | 3.850  | -2.346 | 0.031 | 0.146 | -3.879 |
| Zfp467        | -0.432 | 3.853  | -2.346 | 0.031 | 0.146 | -3.880 |
| 4930529F21Rik | -0.298 | 3.109  | -2.346 | 0.031 | 0.146 | -3.880 |
| Khdrbs2       | -0.539 | 4.464  | -2.346 | 0.031 | 0.146 | -3.881 |
| Foxf1         | -0.482 | 6.113  | -2.345 | 0.031 | 0.146 | -3.881 |
| Gm1976        | -0.282 | 3.667  | -2.345 | 0.031 | 0.146 | -3.881 |
| Hrh3          | -0.278 | 5.704  | -2.345 | 0.031 | 0.146 | -3.881 |
| Lhcgr         | -0.337 | 2.611  | -2.344 | 0.031 | 0.147 | -3.883 |
| Fem1b         | -0.326 | 3.641  | -2.344 | 0.031 | 0.147 | -3.883 |
| Sat2          | -0.461 | 6.208  | -2.344 | 0.031 | 0.147 | -3.883 |

|               |        |        |        |       |       |        |
|---------------|--------|--------|--------|-------|-------|--------|
| Cylc2         | -0.325 | 2.403  | -2.344 | 0.031 | 0.147 | -3.883 |
| Terf1         | 0.408  | 6.169  | 2.344  | 0.031 | 0.147 | -3.883 |
| Crebl2        | -0.514 | 5.934  | -2.344 | 0.031 | 0.147 | -3.883 |
| Chic1         | -0.406 | 3.437  | -2.344 | 0.031 | 0.147 | -3.884 |
| Xpnpep1       | 0.297  | 9.682  | 2.344  | 0.031 | 0.147 | -3.884 |
| 4930565N06Rik | -0.413 | 3.635  | -2.344 | 0.031 | 0.147 | -3.884 |
| Ppmla         | -0.392 | 9.904  | -2.343 | 0.031 | 0.147 | -3.885 |
| AK090257      | -0.396 | 4.247  | -2.343 | 0.031 | 0.147 | -3.885 |
| Mppe1         | -0.277 | 7.881  | -2.343 | 0.031 | 0.147 | -3.886 |
| Gcc1          | -0.414 | 3.558  | -2.343 | 0.031 | 0.147 | -3.886 |
| Asap3         | -0.355 | 4.146  | -2.343 | 0.031 | 0.147 | -3.886 |
| LOC101056057  | 1.502  | 6.985  | 2.342  | 0.031 | 0.147 | -3.887 |
| Cox6b1        | -0.356 | 12.786 | -2.342 | 0.031 | 0.147 | -3.887 |
| D3Ert547e     | -0.281 | 3.106  | -2.342 | 0.031 | 0.147 | -3.888 |
| Pip5k1c       | -0.593 | 7.854  | -2.341 | 0.031 | 0.147 | -3.888 |
| B230303012Rik | -0.417 | 2.957  | -2.341 | 0.031 | 0.147 | -3.888 |
| 1700020L24Rik | -0.359 | 4.299  | -2.341 | 0.031 | 0.147 | -3.888 |
| Ermard        | -0.383 | 6.042  | -2.341 | 0.031 | 0.147 | -3.889 |
| Arhgef6       | -0.686 | 6.879  | -2.341 | 0.031 | 0.147 | -3.889 |
| Pigz          | -0.541 | 5.489  | -2.341 | 0.031 | 0.147 | -3.889 |
| Ddit4         | 1.307  | 7.285  | 2.341  | 0.031 | 0.147 | -3.890 |
| AK037556      | -0.331 | 2.413  | -2.341 | 0.031 | 0.147 | -3.890 |
| Slc4a11       | -0.258 | 6.656  | -2.340 | 0.031 | 0.147 | -3.890 |
| Dpml          | -0.358 | 4.813  | -2.340 | 0.032 | 0.147 | -3.891 |
| Chkb          | -0.377 | 4.855  | -2.340 | 0.032 | 0.147 | -3.891 |
| Psd           | -0.388 | 5.680  | -2.339 | 0.032 | 0.147 | -3.893 |
| Fam216b       | -0.365 | 4.581  | -2.339 | 0.032 | 0.147 | -3.893 |
| Tbcd2         | -0.303 | 6.281  | -2.339 | 0.032 | 0.147 | -3.893 |
| Pfkfb2        | -0.455 | 3.262  | -2.338 | 0.032 | 0.147 | -3.894 |
| Slc34a3       | -0.351 | 3.203  | -2.338 | 0.032 | 0.147 | -3.894 |
| Xpo5          | 0.639  | 6.913  | 2.338  | 0.032 | 0.147 | -3.894 |
| D9Ert26e      | -0.289 | 4.684  | -2.338 | 0.032 | 0.147 | -3.894 |
| AI836737      | -0.275 | 2.685  | -2.338 | 0.032 | 0.148 | -3.895 |
| Otub2         | -0.480 | 5.056  | -2.338 | 0.032 | 0.148 | -3.895 |
| Krt25         | -0.384 | 2.681  | -2.338 | 0.032 | 0.148 | -3.895 |
| Ag1           | -0.374 | 5.235  | -2.337 | 0.032 | 0.148 | -3.896 |
| Mcmbp         | -0.258 | 8.549  | -2.337 | 0.032 | 0.148 | -3.896 |
| 9930012K11Rik | -0.492 | 5.492  | -2.337 | 0.032 | 0.148 | -3.896 |
| Trim35        | -0.361 | 4.683  | -2.337 | 0.032 | 0.148 | -3.896 |
| Tbx6          | -0.369 | 3.594  | -2.337 | 0.032 | 0.148 | -3.896 |
| Rasal2        | 0.381  | 5.434  | 2.337  | 0.032 | 0.148 | -3.896 |
| Gareml        | -0.316 | 4.939  | -2.337 | 0.032 | 0.148 | -3.897 |
| Calcr         | -0.316 | 2.523  | -2.336 | 0.032 | 0.148 | -3.899 |
| Il31ra        | -0.539 | 3.935  | -2.336 | 0.032 | 0.148 | -3.899 |
| Ppplr2        | -0.549 | 7.318  | -2.335 | 0.032 | 0.148 | -3.900 |
| Rb12          | -0.535 | 6.050  | -2.335 | 0.032 | 0.148 | -3.900 |
| Kirrel        | -0.306 | 2.992  | -2.335 | 0.032 | 0.148 | -3.900 |
| Ythdc2        | 0.478  | 6.952  | 2.335  | 0.032 | 0.148 | -3.900 |
| Kcnh1         | -0.497 | 5.444  | -2.335 | 0.032 | 0.148 | -3.901 |
| Gm8615        | -0.604 | 6.594  | -2.335 | 0.032 | 0.148 | -3.901 |

|               |        |        |        |       |       |        |
|---------------|--------|--------|--------|-------|-------|--------|
| Neil3         | -0.390 | 3.879  | -2.334 | 0.032 | 0.148 | -3.901 |
| I15           | -0.271 | 3.182  | -2.334 | 0.032 | 0.148 | -3.901 |
| Ctage5        | -0.304 | 8.626  | -2.334 | 0.032 | 0.148 | -3.901 |
| Usp8          | -0.382 | 8.005  | -2.334 | 0.032 | 0.148 | -3.901 |
| Phf7          | -0.402 | 5.962  | -2.334 | 0.032 | 0.148 | -3.901 |
| Mark4         | -0.343 | 5.206  | -2.334 | 0.032 | 0.148 | -3.902 |
| Gm5463        | -0.366 | 4.840  | -2.334 | 0.032 | 0.148 | -3.902 |
| Ubqln2        | -0.481 | 5.072  | -2.334 | 0.032 | 0.148 | -3.902 |
| Pttglip       | -0.364 | 12.068 | -2.333 | 0.032 | 0.148 | -3.903 |
| Cntnap4       | -0.437 | 3.668  | -2.333 | 0.032 | 0.148 | -3.903 |
| 5430440L12Rik | -0.476 | 5.750  | -2.333 | 0.032 | 0.148 | -3.904 |
| Rapegf1       | -0.422 | 4.258  | -2.333 | 0.032 | 0.148 | -3.904 |
| Mpp7          | -1.080 | 4.661  | -2.332 | 0.032 | 0.148 | -3.905 |
| Prdm4         | 0.344  | 7.154  | 2.332  | 0.032 | 0.148 | -3.905 |
| Clqtnf4       | -0.609 | 4.078  | -2.332 | 0.032 | 0.148 | -3.906 |
| Hamp2         | -2.995 | 9.201  | -2.332 | 0.032 | 0.148 | -3.906 |
| Shq1          | 0.593  | 5.410  | 2.331  | 0.032 | 0.148 | -3.906 |
| Cds2          | -0.421 | 6.475  | -2.331 | 0.032 | 0.148 | -3.906 |
| Nudt17        | -0.492 | 5.092  | -2.331 | 0.032 | 0.148 | -3.907 |
| Ccr3          | -0.349 | 2.835  | -2.331 | 0.032 | 0.148 | -3.907 |
| D3Ertd229e    | -0.289 | 2.795  | -2.331 | 0.032 | 0.148 | -3.907 |
| 4933431I19Rik | -0.362 | 3.272  | -2.330 | 0.032 | 0.149 | -3.909 |
| Als2cr12      | -0.531 | 4.686  | -2.330 | 0.032 | 0.149 | -3.909 |
| Trav12n-1     | -0.434 | 3.631  | -2.330 | 0.032 | 0.149 | -3.909 |
| Ppml1d        | -0.414 | 6.462  | -2.330 | 0.032 | 0.149 | -3.909 |
| Rsad1         | -0.338 | 2.687  | -2.329 | 0.032 | 0.149 | -3.910 |
| Trmt11        | 0.645  | 6.739  | 2.329  | 0.032 | 0.149 | -3.910 |
| Ccdc66        | -0.381 | 6.564  | -2.329 | 0.032 | 0.149 | -3.911 |
| Rasgrp1       | -0.457 | 3.780  | -2.328 | 0.032 | 0.149 | -3.912 |
| Slc38a10      | -0.352 | 9.356  | -2.328 | 0.032 | 0.149 | -3.912 |
| Myadm         | 0.573  | 10.521 | 2.328  | 0.032 | 0.149 | -3.913 |
| Dnajc10       | 0.546  | 9.724  | 2.328  | 0.032 | 0.149 | -3.913 |
| 1700086L19Rik | -0.419 | 3.702  | -2.327 | 0.032 | 0.149 | -3.914 |
| Rps41         | 0.464  | 8.790  | 2.327  | 0.032 | 0.149 | -3.914 |
| Tesk2         | -0.571 | 4.711  | -2.327 | 0.032 | 0.149 | -3.914 |
| Omg           | -0.543 | 5.898  | -2.327 | 0.032 | 0.149 | -3.915 |
| Bin1          | -0.351 | 4.757  | -2.327 | 0.032 | 0.149 | -3.915 |
| St3gal2       | -0.421 | 3.972  | -2.327 | 0.032 | 0.149 | -3.915 |
| Spock3        | -0.303 | 2.132  | -2.326 | 0.032 | 0.149 | -3.916 |
| Amz2          | -0.379 | 7.682  | -2.326 | 0.032 | 0.149 | -3.916 |
| Lrrc4         | -0.787 | 5.761  | -2.326 | 0.032 | 0.149 | -3.916 |
| Vps13c        | -0.484 | 4.368  | -2.326 | 0.032 | 0.149 | -3.916 |
| Rsl1          | -0.354 | 3.160  | -2.326 | 0.032 | 0.149 | -3.916 |
| Tbc1d24       | -0.277 | 2.916  | -2.325 | 0.032 | 0.149 | -3.918 |
| Sh3yl1        | -0.293 | 8.678  | -2.325 | 0.033 | 0.150 | -3.919 |
| 9430021M05Rik | -0.381 | 3.693  | -2.324 | 0.033 | 0.150 | -3.920 |
| 1700001L19Rik | -0.306 | 3.642  | -2.324 | 0.033 | 0.150 | -3.920 |
| Als2          | -0.320 | 6.495  | -2.323 | 0.033 | 0.150 | -3.921 |
| 6530409C15Rik | -0.409 | 4.169  | -2.323 | 0.033 | 0.150 | -3.921 |
| Hoxa7         | -0.391 | 5.500  | -2.323 | 0.033 | 0.150 | -3.921 |



|               |        |        |        |       |       |        |
|---------------|--------|--------|--------|-------|-------|--------|
| Fam26d        | -0.209 | 2.810  | -2.323 | 0.033 | 0.150 | -3.922 |
| AU021760      | -0.403 | 3.709  | -2.323 | 0.033 | 0.150 | -3.922 |
| Gdf2          | -0.273 | 5.798  | -2.323 | 0.033 | 0.150 | -3.922 |
| Hist1h3b      | -1.137 | 5.457  | -2.323 | 0.033 | 0.150 | -3.922 |
| Zfp341        | -0.272 | 4.575  | -2.322 | 0.033 | 0.150 | -3.922 |
| 1700006E09Rik | -0.288 | 2.350  | -2.322 | 0.033 | 0.150 | -3.923 |
| Ube2c         | 0.666  | 9.569  | 2.322  | 0.033 | 0.150 | -3.924 |
| Gm3244        | -0.406 | 10.636 | -2.321 | 0.033 | 0.150 | -3.924 |
| Pcdh11x       | -0.302 | 2.510  | -2.321 | 0.033 | 0.150 | -3.924 |
| Gnb1          | 0.256  | 9.989  | 2.321  | 0.033 | 0.150 | -3.925 |
| Sgca          | -0.333 | 5.167  | -2.321 | 0.033 | 0.150 | -3.926 |
| Prkrir        | -0.389 | 8.159  | -2.321 | 0.033 | 0.150 | -3.926 |
| 1810043G02Rik | -0.318 | 5.482  | -2.320 | 0.033 | 0.150 | -3.926 |
| Cdh16         | -0.317 | 4.043  | -2.320 | 0.033 | 0.150 | -3.926 |
| 2900012M01Rik | -0.399 | 3.232  | -2.320 | 0.033 | 0.150 | -3.927 |
| Cat           | -1.110 | 8.868  | -2.320 | 0.033 | 0.150 | -3.927 |
| A530047J11Rik | -0.524 | 2.860  | -2.320 | 0.033 | 0.150 | -3.927 |
| Gm4491        | -0.244 | 2.251  | -2.320 | 0.033 | 0.150 | -3.927 |
| Ky            | -0.341 | 2.974  | -2.319 | 0.033 | 0.150 | -3.928 |
| Kcnb1         | -0.404 | 4.331  | -2.319 | 0.033 | 0.151 | -3.929 |
| Fzd6          | -0.387 | 8.187  | -2.319 | 0.033 | 0.151 | -3.929 |
| Osgep11       | -0.600 | 5.752  | -2.318 | 0.033 | 0.151 | -3.930 |
| Rbms1         | 0.791  | 8.445  | 2.317  | 0.033 | 0.151 | -3.932 |
| 2210016H18Rik | -0.556 | 8.962  | -2.317 | 0.033 | 0.151 | -3.932 |
| 4930442G10Rik | -0.313 | 3.088  | -2.317 | 0.033 | 0.151 | -3.933 |
| Emx2os        | -0.291 | 3.709  | -2.317 | 0.033 | 0.151 | -3.933 |
| Tspan7        | -0.398 | 6.297  | -2.317 | 0.033 | 0.151 | -3.933 |
| 4933430H16Rik | -0.254 | 3.396  | -2.316 | 0.033 | 0.151 | -3.934 |
| Rimbp2        | -0.424 | 5.161  | -2.316 | 0.033 | 0.151 | -3.934 |
| Lin9          | 0.504  | 3.446  | 2.316  | 0.033 | 0.151 | -3.934 |
| Krt8          | 0.209  | 13.983 | 2.316  | 0.033 | 0.151 | -3.935 |
| B230369F24Rik | -0.316 | 2.531  | -2.315 | 0.033 | 0.151 | -3.935 |
| Dis3          | 0.667  | 6.826  | 2.315  | 0.033 | 0.151 | -3.935 |
| Serpina11     | -0.356 | 5.351  | -2.315 | 0.033 | 0.151 | -3.935 |
| Rbm6          | -0.385 | 6.567  | -2.315 | 0.033 | 0.151 | -3.935 |
| Hoxc8         | -0.365 | 2.423  | -2.315 | 0.033 | 0.151 | -3.936 |
| Myrf          | -0.280 | 10.533 | -2.315 | 0.033 | 0.151 | -3.936 |
| Ppp4r4        | -0.422 | 3.771  | -2.315 | 0.033 | 0.151 | -3.936 |
| Eya2          | 0.418  | 7.836  | 2.315  | 0.033 | 0.151 | -3.936 |
| Igdcc3        | -0.463 | 3.283  | -2.314 | 0.033 | 0.151 | -3.937 |
| 1700039E15Rik | -0.404 | 4.162  | -2.314 | 0.033 | 0.151 | -3.938 |
| Pcsk2         | -0.356 | 2.734  | -2.313 | 0.033 | 0.151 | -3.939 |
| 5830432E09Rik | -0.313 | 3.306  | -2.313 | 0.033 | 0.151 | -3.939 |
| Sh3gl1        | -0.278 | 6.802  | -2.313 | 0.033 | 0.151 | -3.939 |
| Snx31         | -0.303 | 3.551  | -2.313 | 0.033 | 0.151 | -3.939 |
| Cyth1         | 0.263  | 7.628  | 2.313  | 0.033 | 0.151 | -3.939 |
| S100g         | 2.435  | 5.487  | 2.313  | 0.033 | 0.151 | -3.940 |
| Ddx21         | 0.486  | 7.300  | 2.313  | 0.033 | 0.151 | -3.940 |
| Nt5e          | -0.537 | 7.034  | -2.312 | 0.033 | 0.152 | -3.940 |
| Proscos       | -0.351 | 4.047  | -2.312 | 0.033 | 0.152 | -3.941 |

|               |        |        |        |       |       |        |
|---------------|--------|--------|--------|-------|-------|--------|
| LOC432842     | -0.304 | 4.564  | -2.312 | 0.033 | 0.152 | -3.941 |
| 1700018M17Rik | -0.382 | 4.657  | -2.312 | 0.033 | 0.152 | -3.942 |
| Wnt2          | -0.354 | 3.880  | -2.311 | 0.033 | 0.152 | -3.943 |
| Setd5         | 0.597  | 6.756  | 2.311  | 0.033 | 0.152 | -3.943 |
| Camk2d        | 0.356  | 7.411  | 2.311  | 0.033 | 0.152 | -3.943 |
| Lhfp14        | -0.293 | 4.029  | -2.311 | 0.033 | 0.152 | -3.943 |
| Egln1         | -0.405 | 8.151  | -2.311 | 0.033 | 0.152 | -3.944 |
| 1700120E14Rik | -0.357 | 3.153  | -2.311 | 0.033 | 0.152 | -3.944 |
| 4932442L08Rik | -0.380 | 2.851  | -2.310 | 0.033 | 0.152 | -3.944 |
| C77614        | -0.366 | 3.444  | -2.310 | 0.033 | 0.152 | -3.944 |
| Izumo4        | -0.488 | 5.873  | -2.310 | 0.034 | 0.152 | -3.946 |
| 2210408I21Rik | -0.333 | 3.455  | -2.309 | 0.034 | 0.152 | -3.946 |
| Elmod1        | -0.312 | 2.813  | -2.309 | 0.034 | 0.152 | -3.946 |
| Cdkn1a        | 0.539  | 8.446  | 2.309  | 0.034 | 0.152 | -3.947 |
| 11-Mar        | -0.306 | 2.826  | -2.309 | 0.034 | 0.152 | -3.947 |
| Sftpc         | -0.514 | 4.533  | -2.309 | 0.034 | 0.152 | -3.947 |
| Cmpk1         | 0.486  | 11.809 | 2.308  | 0.034 | 0.152 | -3.947 |
| Atp6v1e2      | -0.393 | 3.190  | -2.308 | 0.034 | 0.152 | -3.948 |
| Orc6          | 0.597  | 6.270  | 2.308  | 0.034 | 0.152 | -3.948 |
| Armc12        | -0.331 | 4.427  | -2.308 | 0.034 | 0.152 | -3.948 |
| Calcr1        | -0.436 | 3.197  | -2.308 | 0.034 | 0.152 | -3.949 |
| 4930538K18Rik | -0.405 | 3.056  | -2.308 | 0.034 | 0.152 | -3.949 |
| Col4a6        | -0.341 | 4.744  | -2.307 | 0.034 | 0.152 | -3.949 |
| Hivep3        | -0.413 | 4.483  | -2.307 | 0.034 | 0.152 | -3.950 |
| St3gal4       | 1.717  | 6.882  | 2.307  | 0.034 | 0.152 | -3.950 |
| Olf154        | -0.410 | 3.312  | -2.307 | 0.034 | 0.152 | -3.950 |
| Qsox1         | 0.916  | 9.501  | 2.307  | 0.034 | 0.152 | -3.951 |
| Mypop         | -0.475 | 5.457  | -2.307 | 0.034 | 0.152 | -3.951 |
| C920006011Rik | -0.431 | 5.808  | -2.306 | 0.034 | 0.152 | -3.951 |
| Npm3          | 1.018  | 5.875  | 2.306  | 0.034 | 0.152 | -3.952 |
| 9630005C17Rik | -0.510 | 3.863  | -2.306 | 0.034 | 0.153 | -3.953 |
| 8430419L09Rik | -0.636 | 8.068  | -2.305 | 0.034 | 0.153 | -3.953 |
| Tgfb1l1       | -0.524 | 6.750  | -2.305 | 0.034 | 0.153 | -3.954 |
| 5830431M20Rik | -0.339 | 3.045  | -2.305 | 0.034 | 0.153 | -3.954 |
| Snx3          | -0.371 | 10.871 | -2.305 | 0.034 | 0.153 | -3.954 |
| Pdzd11        | -0.313 | 8.421  | -2.304 | 0.034 | 0.153 | -3.955 |
| Tmem183a      | 0.316  | 8.854  | 2.304  | 0.034 | 0.153 | -3.955 |
| Gm10034       | -0.415 | 5.121  | -2.304 | 0.034 | 0.153 | -3.955 |
| Mier2         | 0.356  | 5.970  | 2.304  | 0.034 | 0.153 | -3.955 |
| Prss55        | -0.354 | 5.109  | -2.304 | 0.034 | 0.153 | -3.955 |
| Gjb3          | -0.254 | 4.341  | -2.304 | 0.034 | 0.153 | -3.955 |
| Depdc7        | -0.995 | 4.435  | -2.304 | 0.034 | 0.153 | -3.956 |
| D830025C05Rik | -0.375 | 4.256  | -2.304 | 0.034 | 0.153 | -3.956 |
| 4930419G24Rik | -0.440 | 4.896  | -2.304 | 0.034 | 0.153 | -3.956 |
| 4933417C20Rik | -0.369 | 3.396  | -2.303 | 0.034 | 0.153 | -3.957 |
| Neb1          | 1.293  | 5.326  | 2.303  | 0.034 | 0.153 | -3.957 |
| Slc2a10       | -0.550 | 7.360  | -2.303 | 0.034 | 0.153 | -3.957 |
| Adat2         | 0.621  | 6.103  | 2.303  | 0.034 | 0.153 | -3.958 |
| Tslp          | -0.365 | 2.828  | -2.303 | 0.034 | 0.153 | -3.958 |
| Znrf3         | -0.591 | 6.958  | -2.303 | 0.034 | 0.153 | -3.958 |

|               |        |        |        |       |       |        |
|---------------|--------|--------|--------|-------|-------|--------|
| Lgals1        | -1.109 | 7.922  | -2.302 | 0.034 | 0.153 | -3.958 |
| Zgpat         | -0.364 | 6.966  | -2.302 | 0.034 | 0.153 | -3.959 |
| Tnp1          | -0.301 | 2.671  | -2.302 | 0.034 | 0.153 | -3.959 |
| 4933438B17Rik | -0.329 | 4.294  | -2.302 | 0.034 | 0.153 | -3.959 |
| Tecr          | -0.356 | 10.227 | -2.302 | 0.034 | 0.153 | -3.959 |
| Spata4        | -0.304 | 3.325  | -2.302 | 0.034 | 0.153 | -3.959 |
| Cenpa         | -0.445 | 2.868  | -2.302 | 0.034 | 0.153 | -3.960 |
| 4933430H06Rik | -0.277 | 3.226  | -2.301 | 0.034 | 0.153 | -3.960 |
| Cyp2d26       | 1.505  | 6.413  | 2.301  | 0.034 | 0.153 | -3.960 |
| LOC101056011  | -0.368 | 5.280  | -2.301 | 0.034 | 0.153 | -3.960 |
| Fbx17         | -0.331 | 4.248  | -2.301 | 0.034 | 0.153 | -3.960 |
| Rpe65         | -0.445 | 4.047  | -2.300 | 0.034 | 0.153 | -3.962 |
| Lbx2          | -0.497 | 3.747  | -2.300 | 0.034 | 0.153 | -3.963 |
| Mptx1         | -0.283 | 2.551  | -2.300 | 0.034 | 0.153 | -3.963 |
| Hes5          | -0.459 | 3.960  | -2.299 | 0.034 | 0.154 | -3.964 |
| 4930550C14Rik | -0.304 | 2.470  | -2.299 | 0.034 | 0.154 | -3.964 |
| Spdya         | -0.307 | 2.419  | -2.299 | 0.034 | 0.154 | -3.965 |
| Zmym5         | 0.539  | 7.623  | 2.298  | 0.034 | 0.154 | -3.966 |
| Ushbp1        | -0.388 | 4.233  | -2.298 | 0.034 | 0.154 | -3.966 |
| Tdrd12        | -0.360 | 3.299  | -2.298 | 0.034 | 0.154 | -3.966 |
| 2700029M09Rik | 0.343  | 9.084  | 2.297  | 0.034 | 0.154 | -3.968 |
| Il1rap12      | -0.384 | 3.300  | -2.297 | 0.034 | 0.154 | -3.968 |
| Kcnmb1        | -0.397 | 3.537  | -2.296 | 0.034 | 0.154 | -3.969 |
| Fshr          | -0.384 | 4.989  | -2.296 | 0.034 | 0.154 | -3.969 |
| Lamp5         | -0.392 | 3.053  | -2.296 | 0.034 | 0.154 | -3.969 |
| Zzef1         | 0.329  | 7.258  | 2.296  | 0.034 | 0.154 | -3.969 |
| Ifitm5        | -0.267 | 5.336  | -2.296 | 0.034 | 0.154 | -3.970 |
| Nup54         | 0.384  | 4.033  | 2.296  | 0.034 | 0.154 | -3.970 |
| 4930593A02Rik | -0.325 | 3.717  | -2.296 | 0.034 | 0.154 | -3.970 |
| Tctel         | -0.311 | 3.164  | -2.296 | 0.034 | 0.154 | -3.971 |
| Atf6          | -0.281 | 7.362  | -2.296 | 0.034 | 0.154 | -3.971 |
| Srsf7         | 0.434  | 7.145  | 2.295  | 0.034 | 0.154 | -3.971 |
| D10Wsu159e    | -0.401 | 2.770  | -2.295 | 0.034 | 0.154 | -3.971 |
| Galnt16       | -0.352 | 6.385  | -2.295 | 0.034 | 0.154 | -3.971 |
| Dgcr8         | -0.275 | 4.557  | -2.295 | 0.034 | 0.154 | -3.971 |
| Nnt           | -0.819 | 7.663  | -2.295 | 0.035 | 0.154 | -3.972 |
| Trdn          | -0.339 | 2.882  | -2.295 | 0.035 | 0.154 | -3.972 |
| Gm732         | -0.304 | 2.644  | -2.294 | 0.035 | 0.154 | -3.973 |
| Hmox1         | 0.573  | 6.133  | 2.294  | 0.035 | 0.154 | -3.973 |
| Vma21         | -0.872 | 6.857  | -2.294 | 0.035 | 0.154 | -3.974 |
| Lceli         | -0.652 | 7.191  | -2.293 | 0.035 | 0.154 | -3.974 |
| Gm5485        | -0.633 | 5.549  | -2.293 | 0.035 | 0.155 | -3.975 |
| Wdr17         | -0.294 | 2.463  | -2.293 | 0.035 | 0.155 | -3.976 |
| Stk38         | 0.408  | 9.962  | 2.292  | 0.035 | 0.155 | -3.976 |
| Tgs1          | 0.372  | 7.577  | 2.292  | 0.035 | 0.155 | -3.977 |
| Gm8203        | 0.369  | 11.888 | 2.292  | 0.035 | 0.155 | -3.977 |
| Naalad12      | -0.365 | 4.001  | -2.292 | 0.035 | 0.155 | -3.977 |
| Sik1          | -0.347 | 5.156  | -2.292 | 0.035 | 0.155 | -3.978 |
| Nlrp5-ps      | -0.377 | 2.846  | -2.291 | 0.035 | 0.155 | -3.978 |
| Dnmt1         | 0.412  | 7.832  | 2.291  | 0.035 | 0.155 | -3.979 |

|               |        |        |        |       |       |        |
|---------------|--------|--------|--------|-------|-------|--------|
| Med12         | 0.363  | 6.874  | 2.291  | 0.035 | 0.155 | -3.979 |
| Nlr1          | 0.597  | 6.541  | 2.290  | 0.035 | 0.155 | -3.980 |
| Mmrn2         | -0.443 | 5.454  | -2.290 | 0.035 | 0.155 | -3.980 |
| Glpr111       | -0.212 | 2.369  | -2.290 | 0.035 | 0.155 | -3.980 |
| Bmp6          | -0.645 | 4.061  | -2.290 | 0.035 | 0.155 | -3.980 |
| 5830440H09Rik | -0.410 | 4.824  | -2.290 | 0.035 | 0.155 | -3.981 |
| Tbcd10b       | 0.329  | 9.149  | 2.290  | 0.035 | 0.155 | -3.981 |
| Pplr3g        | -0.325 | 2.895  | -2.289 | 0.035 | 0.155 | -3.982 |
| Clu           | 0.453  | 12.898 | 2.289  | 0.035 | 0.155 | -3.982 |
| Ern2          | 1.285  | 8.676  | 2.289  | 0.035 | 0.155 | -3.983 |
| Dhrs2         | -0.341 | 3.570  | -2.289 | 0.035 | 0.155 | -3.983 |
| 4930524C18Rik | -0.505 | 2.857  | -2.288 | 0.035 | 0.155 | -3.983 |
| Natd1         | -0.331 | 7.071  | -2.288 | 0.035 | 0.155 | -3.983 |
| Taf1b         | -0.461 | 5.425  | -2.288 | 0.035 | 0.155 | -3.984 |
| Prrt4         | -0.454 | 3.903  | -2.288 | 0.035 | 0.155 | -3.984 |
| Vmlr53        | -0.435 | 2.793  | -2.288 | 0.035 | 0.155 | -3.984 |
| Aggf1         | 0.271  | 8.341  | 2.288  | 0.035 | 0.155 | -3.984 |
| Osbp2         | -0.331 | 5.124  | -2.287 | 0.035 | 0.155 | -3.985 |
| Vimp          | 0.369  | 9.514  | 2.287  | 0.035 | 0.155 | -3.985 |
| Ndufa9        | -0.294 | 10.850 | -2.287 | 0.035 | 0.155 | -3.986 |
| C77648        | 1.077  | 4.409  | 2.287  | 0.035 | 0.155 | -3.986 |
| 1700023E05Rik | -0.338 | 4.301  | -2.287 | 0.035 | 0.155 | -3.986 |
| Ipo7          | 1.141  | 4.214  | 2.287  | 0.035 | 0.155 | -3.986 |
| Rps11         | 0.230  | 12.835 | 2.287  | 0.035 | 0.155 | -3.986 |
| Cks2          | 0.528  | 9.111  | 2.287  | 0.035 | 0.156 | -3.987 |
| Fgfr3         | -0.496 | 5.577  | -2.286 | 0.035 | 0.156 | -3.987 |
| LOC102636518  | -0.375 | 3.955  | -2.286 | 0.035 | 0.156 | -3.987 |
| Scara5        | -0.412 | 4.636  | -2.286 | 0.035 | 0.156 | -3.987 |
| 2410124H12Rik | -0.414 | 4.141  | -2.286 | 0.035 | 0.156 | -3.988 |
| Fam131b       | -0.307 | 4.393  | -2.286 | 0.035 | 0.156 | -3.988 |
| D19Ert409e    | 1.347  | 6.538  | 2.286  | 0.035 | 0.156 | -3.988 |
| BC042727      | -0.276 | 2.796  | -2.285 | 0.035 | 0.156 | -3.989 |
| Lrrc63        | -0.304 | 3.137  | -2.285 | 0.035 | 0.156 | -3.990 |
| Cort          | -0.348 | 6.191  | -2.285 | 0.035 | 0.156 | -3.990 |
| Cry2          | -0.679 | 6.408  | -2.284 | 0.035 | 0.156 | -3.991 |
| Cdk13         | -0.259 | 3.122  | -2.284 | 0.035 | 0.156 | -3.991 |
| Cdc42ep2      | -0.380 | 8.070  | -2.284 | 0.035 | 0.156 | -3.991 |
| Slc35d1       | 0.437  | 8.632  | 2.283  | 0.035 | 0.156 | -3.993 |
| Kif21b        | -0.332 | 3.040  | -2.283 | 0.035 | 0.156 | -3.994 |
| Srrm2         | 0.551  | 7.639  | 2.282  | 0.035 | 0.156 | -3.994 |
| Gm11559       | -0.335 | 2.273  | -2.282 | 0.035 | 0.156 | -3.994 |
| B430105G09Rik | -0.394 | 3.893  | -2.282 | 0.035 | 0.156 | -3.995 |
| Armex1        | -0.563 | 4.844  | -2.282 | 0.035 | 0.156 | -3.995 |
| Bpifb3        | -0.495 | 4.369  | -2.282 | 0.035 | 0.156 | -3.995 |
| C78948        | -0.320 | 2.897  | -2.282 | 0.035 | 0.156 | -3.996 |
| Slc39a10      | -0.688 | 7.808  | -2.281 | 0.035 | 0.157 | -3.996 |
| Agr3          | -0.374 | 2.748  | -2.281 | 0.035 | 0.157 | -3.997 |
| Ar            | -0.400 | 4.845  | -2.281 | 0.036 | 0.157 | -3.997 |
| Agpat1        | -0.437 | 5.851  | -2.281 | 0.036 | 0.157 | -3.997 |
| Shisa7        | -0.330 | 4.859  | -2.280 | 0.036 | 0.157 | -3.997 |

|               |        |        |        |       |       |        |
|---------------|--------|--------|--------|-------|-------|--------|
| Cdh4          | -0.357 | 3.367  | -2.280 | 0.036 | 0.157 | -3.998 |
| Sf3b5         | 0.493  | 9.926  | 2.280  | 0.036 | 0.157 | -3.998 |
| Slc35a2       | 0.357  | 6.065  | 2.280  | 0.036 | 0.157 | -3.998 |
| 4921525009Rik | -0.330 | 3.552  | -2.280 | 0.036 | 0.157 | -3.998 |
| Clqb          | 1.726  | 7.102  | 2.280  | 0.036 | 0.157 | -3.998 |
| D530039A21Rik | -0.427 | 5.515  | -2.280 | 0.036 | 0.157 | -3.998 |
| Tbata         | -0.340 | 2.757  | -2.280 | 0.036 | 0.157 | -3.998 |
| Uqcc2         | -0.344 | 7.362  | -2.280 | 0.036 | 0.157 | -3.998 |
| Farpl         | -0.407 | 6.747  | -2.280 | 0.036 | 0.157 | -3.999 |
| Iigpl         | 3.360  | 7.134  | 2.280  | 0.036 | 0.157 | -3.999 |
| Rpl8          | 0.313  | 12.443 | 2.279  | 0.036 | 0.157 | -3.999 |
| Gm17586       | 0.515  | 4.696  | 2.279  | 0.036 | 0.157 | -4.000 |
| Lcelh         | -0.379 | 6.767  | -2.279 | 0.036 | 0.157 | -4.000 |
| Meis1         | 0.891  | 5.562  | 2.279  | 0.036 | 0.157 | -4.000 |
| AI428898      | -0.314 | 3.317  | -2.279 | 0.036 | 0.157 | -4.000 |
| Zar1          | -0.405 | 4.502  | -2.279 | 0.036 | 0.157 | -4.000 |
| Fam178a       | 0.464  | 6.955  | 2.279  | 0.036 | 0.157 | -4.001 |
| C530008M17Rik | -0.448 | 4.347  | -2.279 | 0.036 | 0.157 | -4.001 |
| Ephx3         | -0.521 | 4.767  | -2.278 | 0.036 | 0.157 | -4.001 |
| Osbp          | -0.311 | 9.904  | -2.278 | 0.036 | 0.157 | -4.002 |
| Acrbp         | -0.232 | 7.736  | -2.278 | 0.036 | 0.157 | -4.002 |
| Top2a         | -0.417 | 3.638  | -2.278 | 0.036 | 0.157 | -4.002 |
| Tex14         | -0.321 | 3.486  | -2.278 | 0.036 | 0.157 | -4.002 |
| Nkx3-1        | -0.428 | 3.445  | -2.277 | 0.036 | 0.157 | -4.004 |
| Trim44        | -0.440 | 3.367  | -2.277 | 0.036 | 0.157 | -4.004 |
| 4933428L01Rik | -0.387 | 4.258  | -2.277 | 0.036 | 0.157 | -4.004 |
| Ccnd1         | 0.488  | 9.002  | 2.277  | 0.036 | 0.157 | -4.004 |
| Ndufa13       | -0.403 | 11.955 | -2.276 | 0.036 | 0.157 | -4.005 |
| P2rx2         | -0.328 | 4.574  | -2.276 | 0.036 | 0.157 | -4.005 |
| Gm20559       | 1.048  | 6.590  | 2.276  | 0.036 | 0.157 | -4.005 |
| Clec4a2       | -0.574 | 4.003  | -2.275 | 0.036 | 0.157 | -4.006 |
| H2-D1         | 0.968  | 12.643 | 2.275  | 0.036 | 0.157 | -4.007 |
| 1700019L03Rik | -0.254 | 2.732  | -2.275 | 0.036 | 0.157 | -4.007 |
| Gm16491       | -0.328 | 3.590  | -2.275 | 0.036 | 0.157 | -4.007 |
| Adh7          | -1.325 | 8.093  | -2.274 | 0.036 | 0.157 | -4.008 |
| Clec7a        | 1.913  | 7.678  | 2.274  | 0.036 | 0.157 | -4.009 |
| Racgap1       | 0.735  | 6.745  | 2.274  | 0.036 | 0.157 | -4.009 |
| Fbxo36        | -0.470 | 6.624  | -2.274 | 0.036 | 0.158 | -4.009 |
| Phkb          | -0.453 | 8.003  | -2.274 | 0.036 | 0.158 | -4.010 |
| Dtnb          | -0.382 | 5.590  | -2.274 | 0.036 | 0.158 | -4.010 |
| I54           | -0.404 | 3.577  | -2.273 | 0.036 | 0.158 | -4.010 |
| Vps37b        | 0.315  | 7.805  | 2.273  | 0.036 | 0.158 | -4.010 |
| Hoxb9         | -0.374 | 4.086  | -2.273 | 0.036 | 0.158 | -4.010 |
| A430108G06Rik | -0.342 | 2.676  | -2.273 | 0.036 | 0.158 | -4.011 |
| Atp5c1        | -0.300 | 11.904 | -2.273 | 0.036 | 0.158 | -4.011 |
| 4933439G19Rik | -0.395 | 3.418  | -2.272 | 0.036 | 0.158 | -4.012 |
| Dip2a         | -0.262 | 5.637  | -2.272 | 0.036 | 0.158 | -4.012 |
| 1700042G07Rik | -0.312 | 4.237  | -2.272 | 0.036 | 0.158 | -4.012 |
| Taspl         | -0.634 | 6.082  | -2.272 | 0.036 | 0.158 | -4.012 |
| Clpp          | -0.477 | 8.350  | -2.272 | 0.036 | 0.158 | -4.012 |

|               |        |        |        |       |       |        |
|---------------|--------|--------|--------|-------|-------|--------|
| Brs3          | -0.331 | 4.689  | -2.272 | 0.036 | 0.158 | -4.012 |
| Mbd5          | 0.553  | 6.294  | 2.272  | 0.036 | 0.158 | -4.013 |
| Map1s         | 0.388  | 6.568  | 2.272  | 0.036 | 0.158 | -4.013 |
| Pik3ip1       | 0.429  | 5.592  | 2.271  | 0.036 | 0.158 | -4.013 |
| Rabep2        | -0.374 | 5.284  | -2.271 | 0.036 | 0.158 | -4.013 |
| Cep5711       | -0.348 | 4.171  | -2.271 | 0.036 | 0.158 | -4.014 |
| Gm10804       | -0.456 | 4.227  | -2.271 | 0.036 | 0.158 | -4.014 |
| Ddx25         | -0.330 | 3.739  | -2.271 | 0.036 | 0.158 | -4.014 |
| Gm4604        | 0.324  | 12.496 | 2.271  | 0.036 | 0.158 | -4.014 |
| Cldn2         | 2.798  | 8.444  | 2.270  | 0.036 | 0.158 | -4.015 |
| Zfp53         | 0.988  | 5.001  | 2.270  | 0.036 | 0.158 | -4.015 |
| Rpn1          | 0.366  | 11.521 | 2.270  | 0.036 | 0.158 | -4.015 |
| Calca         | -0.395 | 3.156  | -2.270 | 0.036 | 0.158 | -4.015 |
| Clec21        | -0.299 | 5.280  | -2.270 | 0.036 | 0.158 | -4.016 |
| Actr8         | -0.288 | 7.058  | -2.270 | 0.036 | 0.158 | -4.016 |
| Cdc51         | -0.639 | 8.385  | -2.270 | 0.036 | 0.158 | -4.016 |
| Cdr21         | -0.371 | 4.963  | -2.269 | 0.036 | 0.158 | -4.017 |
| Tfap2e        | -0.355 | 2.897  | -2.269 | 0.036 | 0.158 | -4.017 |
| Cdca2         | 0.628  | 6.645  | 2.268  | 0.036 | 0.158 | -4.019 |
| A730054J21Rik | -0.503 | 3.390  | -2.268 | 0.036 | 0.158 | -4.019 |
| Slc16a12      | -0.388 | 3.077  | -2.268 | 0.036 | 0.158 | -4.019 |
| Creb5         | -0.254 | 3.056  | -2.268 | 0.036 | 0.158 | -4.020 |
| Gpr143        | -0.484 | 3.632  | -2.268 | 0.036 | 0.158 | -4.020 |
| 5330439A09Rik | -0.370 | 2.943  | -2.267 | 0.036 | 0.158 | -4.021 |
| Tgtp1         | 3.639  | 9.400  | 2.267  | 0.036 | 0.158 | -4.021 |
| Fam133b       | 0.261  | 7.005  | 2.267  | 0.036 | 0.158 | -4.021 |
| Hapln4        | -0.792 | 5.202  | -2.267 | 0.036 | 0.158 | -4.021 |
| Elk1          | -0.413 | 4.392  | -2.267 | 0.037 | 0.158 | -4.022 |
| Kcns1         | -0.408 | 3.972  | -2.266 | 0.037 | 0.159 | -4.022 |
| Syt6          | -0.330 | 2.441  | -2.266 | 0.037 | 0.159 | -4.023 |
| Tbx5          | -0.297 | 3.272  | -2.266 | 0.037 | 0.159 | -4.023 |
| Ampd1         | -0.422 | 3.578  | -2.266 | 0.037 | 0.159 | -4.023 |
| Rbm46         | -0.286 | 2.188  | -2.265 | 0.037 | 0.159 | -4.024 |
| Spata21       | -0.412 | 5.360  | -2.265 | 0.037 | 0.159 | -4.025 |
| 6430571L13Rik | -0.331 | 3.188  | -2.265 | 0.037 | 0.159 | -4.025 |
| Adh6-ps1      | -0.267 | 2.637  | -2.264 | 0.037 | 0.159 | -4.026 |
| Brk1          | 0.329  | 10.006 | 2.264  | 0.037 | 0.159 | -4.027 |
| Fam83h        | 0.516  | 5.695  | 2.264  | 0.037 | 0.159 | -4.027 |
| Fscn3         | -0.364 | 4.051  | -2.263 | 0.037 | 0.159 | -4.028 |
| Trim62        | -0.602 | 6.704  | -2.263 | 0.037 | 0.159 | -4.028 |
| Cd151         | -0.541 | 5.081  | -2.263 | 0.037 | 0.159 | -4.028 |
| Pcdh12        | -0.400 | 3.680  | -2.263 | 0.037 | 0.159 | -4.028 |
| Zfp651        | -0.395 | 5.850  | -2.263 | 0.037 | 0.159 | -4.029 |
| Adh6b         | -0.323 | 5.166  | -2.263 | 0.037 | 0.159 | -4.029 |
| Styk1         | 0.470  | 7.907  | 2.263  | 0.037 | 0.159 | -4.029 |
| 2610028L16Rik | 1.263  | 5.137  | 2.263  | 0.037 | 0.159 | -4.029 |
| 1700082C02Rik | -0.281 | 2.193  | -2.262 | 0.037 | 0.159 | -4.029 |
| Serf2         | -0.468 | 9.332  | -2.262 | 0.037 | 0.159 | -4.030 |
| Gnao1         | -0.371 | 4.320  | -2.262 | 0.037 | 0.159 | -4.030 |
| Adra2c        | -0.365 | 5.123  | -2.262 | 0.037 | 0.159 | -4.030 |

|               |        |        |        |       |       |        |
|---------------|--------|--------|--------|-------|-------|--------|
| LOC102636754  | -0.360 | 3.443  | -2.262 | 0.037 | 0.159 | -4.031 |
| Scrt1         | -0.406 | 3.184  | -2.261 | 0.037 | 0.159 | -4.032 |
| Rundc1        | 0.261  | 8.389  | 2.261  | 0.037 | 0.160 | -4.032 |
| Sox3          | -0.322 | 3.113  | -2.261 | 0.037 | 0.160 | -4.032 |
| Ptprz1        | -0.275 | 2.411  | -2.259 | 0.037 | 0.160 | -4.035 |
| D430040D24Rik | -0.394 | 4.308  | -2.259 | 0.037 | 0.160 | -4.035 |
| Mmp13         | 1.177  | 4.025  | 2.259  | 0.037 | 0.160 | -4.036 |
| Tmem87b       | -0.619 | 5.922  | -2.259 | 0.037 | 0.160 | -4.036 |
| Pdik11        | -0.450 | 5.632  | -2.259 | 0.037 | 0.160 | -4.036 |
| Gm6277        | -0.365 | 4.259  | -2.258 | 0.037 | 0.160 | -4.037 |
| Trim75        | -0.282 | 3.030  | -2.258 | 0.037 | 0.160 | -4.037 |
| Ndufv2        | -0.373 | 11.451 | -2.258 | 0.037 | 0.160 | -4.037 |
| Mapkbp1       | -0.340 | 5.822  | -2.258 | 0.037 | 0.160 | -4.037 |
| Parp11        | 0.872  | 7.231  | 2.258  | 0.037 | 0.160 | -4.037 |
| C85319        | -0.408 | 2.954  | -2.258 | 0.037 | 0.160 | -4.037 |
| Ceacam10      | 1.444  | 8.861  | 2.257  | 0.037 | 0.160 | -4.039 |
| Ilk           | -0.406 | 8.049  | -2.257 | 0.037 | 0.160 | -4.039 |
| 2900006B11Rik | -0.365 | 3.395  | -2.257 | 0.037 | 0.160 | -4.040 |
| Asb8          | -0.242 | 7.758  | -2.256 | 0.037 | 0.160 | -4.040 |
| Zfp941        | -0.418 | 3.563  | -2.256 | 0.037 | 0.160 | -4.040 |
| Nkrf          | 0.548  | 6.319  | 2.256  | 0.037 | 0.160 | -4.041 |
| Abhd3         | -1.304 | 6.542  | -2.256 | 0.037 | 0.160 | -4.041 |
| Hsf4          | -0.337 | 4.414  | -2.256 | 0.037 | 0.160 | -4.041 |
| AK050197      | -0.463 | 3.409  | -2.256 | 0.037 | 0.160 | -4.041 |
| Anxa8         | 1.798  | 6.958  | 2.255  | 0.037 | 0.161 | -4.042 |
| Oprd1         | -0.259 | 2.972  | -2.255 | 0.037 | 0.161 | -4.042 |
| Ssbp3         | -0.445 | 6.771  | -2.255 | 0.037 | 0.161 | -4.042 |
| Nespas        | -0.311 | 3.544  | -2.255 | 0.037 | 0.161 | -4.043 |
| Clec11a       | -0.394 | 4.944  | -2.255 | 0.037 | 0.161 | -4.043 |
| Slc26a11      | -0.433 | 5.138  | -2.255 | 0.037 | 0.161 | -4.043 |
| Pdlim7        | -0.471 | 6.720  | -2.255 | 0.037 | 0.161 | -4.043 |
| Gm7285        | 0.427  | 12.095 | 2.255  | 0.037 | 0.161 | -4.043 |
| Cercam        | -0.300 | 4.256  | -2.254 | 0.037 | 0.161 | -4.044 |
| Zfp691        | -0.370 | 7.160  | -2.254 | 0.037 | 0.161 | -4.044 |
| Grpel2        | -0.356 | 6.693  | -2.254 | 0.037 | 0.161 | -4.044 |
| Dse           | 0.315  | 2.444  | 2.254  | 0.037 | 0.161 | -4.045 |
| Olfir870      | -0.377 | 3.549  | -2.254 | 0.037 | 0.161 | -4.045 |
| Atad2         | 0.609  | 7.730  | 2.254  | 0.037 | 0.161 | -4.045 |
| 5830433D23Rik | -0.428 | 4.128  | -2.254 | 0.037 | 0.161 | -4.045 |
| Acsf2         | -0.309 | 6.105  | -2.253 | 0.037 | 0.161 | -4.045 |
| Nipbl         | -1.329 | 7.661  | -2.253 | 0.038 | 0.161 | -4.047 |
| C80171        | -0.257 | 3.473  | -2.252 | 0.038 | 0.161 | -4.047 |
| 2700089E24Rik | -0.331 | 4.388  | -2.252 | 0.038 | 0.161 | -4.049 |
| 4921518B13Rik | -0.396 | 4.536  | -2.251 | 0.038 | 0.161 | -4.049 |
| Psm2          | 0.396  | 10.762 | 2.251  | 0.038 | 0.161 | -4.049 |
| Cnep1r1       | 0.253  | 8.847  | 2.251  | 0.038 | 0.161 | -4.049 |
| Xrcc4         | -0.309 | 6.192  | -2.251 | 0.038 | 0.161 | -4.050 |
| Pik3c2a       | -0.302 | 8.418  | -2.250 | 0.038 | 0.162 | -4.051 |
| Gpr125        | -0.324 | 8.562  | -2.250 | 0.038 | 0.162 | -4.052 |
| Sun1          | -0.300 | 8.600  | -2.250 | 0.038 | 0.162 | -4.052 |

|               |        |        |        |       |       |        |
|---------------|--------|--------|--------|-------|-------|--------|
| Ugdh          | -0.422 | 11.463 | -2.250 | 0.038 | 0.162 | -4.052 |
| D8Ert575e     | -0.283 | 2.234  | -2.250 | 0.038 | 0.162 | -4.052 |
| Txlnb         | -0.273 | 2.288  | -2.249 | 0.038 | 0.162 | -4.052 |
| Ly6g6c        | -0.629 | 6.876  | -2.249 | 0.038 | 0.162 | -4.053 |
| 4932438H23Rik | -0.459 | 4.338  | -2.249 | 0.038 | 0.162 | -4.053 |
| BC048679      | -0.265 | 2.988  | -2.249 | 0.038 | 0.162 | -4.053 |
| Thumpd1       | 0.377  | 7.059  | 2.249  | 0.038 | 0.162 | -4.054 |
| Muc13         | 1.425  | 6.856  | 2.249  | 0.038 | 0.162 | -4.054 |
| Uapl          | 0.452  | 9.363  | 2.248  | 0.038 | 0.162 | -4.055 |
| Tfap4         | 0.452  | 4.881  | 2.248  | 0.038 | 0.162 | -4.055 |
| Ms4a7         | 0.928  | 6.072  | 2.247  | 0.038 | 0.162 | -4.056 |
| Brwd3         | 0.420  | 5.865  | 2.247  | 0.038 | 0.162 | -4.056 |
| Slc7a7        | 0.421  | 6.925  | 2.247  | 0.038 | 0.162 | -4.057 |
| 1700017L05Rik | -0.312 | 2.714  | -2.247 | 0.038 | 0.162 | -4.057 |
| Wdr7          | -0.403 | 7.776  | -2.247 | 0.038 | 0.162 | -4.057 |
| Arrb2         | 0.650  | 6.603  | 2.247  | 0.038 | 0.162 | -4.058 |
| Asrgl1        | -0.387 | 5.356  | -2.246 | 0.038 | 0.162 | -4.058 |
| Ppwd1         | 0.446  | 4.513  | 2.246  | 0.038 | 0.162 | -4.058 |
| Rmnd5b        | -0.266 | 7.382  | -2.246 | 0.038 | 0.162 | -4.059 |
| Actl6a        | 0.395  | 7.552  | 2.246  | 0.038 | 0.162 | -4.059 |
| BC047062      | -0.413 | 4.163  | -2.245 | 0.038 | 0.162 | -4.060 |
| Cd40          | 0.700  | 4.542  | 2.245  | 0.038 | 0.162 | -4.060 |
| B9d1          | 0.695  | 6.348  | 2.245  | 0.038 | 0.162 | -4.060 |
| Gm2590        | 1.750  | 6.129  | 2.245  | 0.038 | 0.162 | -4.060 |
| Ptgr2         | -0.396 | 5.607  | -2.245 | 0.038 | 0.162 | -4.061 |
| Prr13         | 0.280  | 12.112 | 2.245  | 0.038 | 0.162 | -4.061 |
| Dopey2        | -0.472 | 9.082  | -2.245 | 0.038 | 0.162 | -4.061 |
| Sf3a3         | 0.526  | 7.836  | 2.245  | 0.038 | 0.162 | -4.061 |
| Syn1          | -0.475 | 5.460  | -2.245 | 0.038 | 0.162 | -4.061 |
| Scn7a         | -0.362 | 3.624  | -2.245 | 0.038 | 0.162 | -4.061 |
| Cnot61        | 0.532  | 9.406  | 2.244  | 0.038 | 0.162 | -4.062 |
| Rrs1          | 0.629  | 8.122  | 2.244  | 0.038 | 0.162 | -4.062 |
| Trem11        | -0.396 | 4.871  | -2.244 | 0.038 | 0.162 | -4.062 |
| 1700008N17Rik | -0.299 | 3.116  | -2.244 | 0.038 | 0.163 | -4.063 |
| B430319H21Rik | -0.352 | 4.690  | -2.244 | 0.038 | 0.163 | -4.063 |
| BC021891      | -0.354 | 6.093  | -2.243 | 0.038 | 0.163 | -4.063 |
| Tmem132a      | 0.317  | 5.864  | 2.243  | 0.038 | 0.163 | -4.063 |
| Sez61         | -0.324 | 3.791  | -2.243 | 0.038 | 0.163 | -4.064 |
| 9630002A11Rik | -0.341 | 3.773  | -2.243 | 0.038 | 0.163 | -4.064 |
| Zbtb4         | 0.422  | 6.701  | 2.243  | 0.038 | 0.163 | -4.065 |
| Ankrd29       | -0.305 | 2.257  | -2.242 | 0.038 | 0.163 | -4.065 |
| Eny2          | -0.570 | 6.395  | -2.242 | 0.038 | 0.163 | -4.065 |
| 6030438J01    | -0.406 | 3.210  | -2.242 | 0.038 | 0.163 | -4.065 |
| Zfp92         | -0.380 | 4.164  | -2.242 | 0.038 | 0.163 | -4.065 |
| Dpf3          | -0.347 | 6.860  | -2.242 | 0.038 | 0.163 | -4.066 |
| Mfn2          | 0.275  | 8.900  | 2.241  | 0.038 | 0.163 | -4.067 |
| Zfp87         | -0.422 | 6.633  | -2.241 | 0.038 | 0.163 | -4.068 |
| LOC102636733  | -0.391 | 5.598  | -2.241 | 0.038 | 0.163 | -4.068 |
| 2610015P09Rik | -0.435 | 4.118  | -2.240 | 0.038 | 0.163 | -4.068 |
| Nr0b2         | -0.850 | 6.901  | -2.240 | 0.038 | 0.163 | -4.069 |



|               |        |        |        |       |       |        |
|---------------|--------|--------|--------|-------|-------|--------|
| DXErttd223e   | -0.309 | 3.504  | -2.240 | 0.039 | 0.163 | -4.070 |
| Nr4a2         | -0.351 | 5.052  | -2.239 | 0.039 | 0.163 | -4.070 |
| 4921515L22Rik | -0.480 | 4.176  | -2.239 | 0.039 | 0.163 | -4.071 |
| Ccl7          | -0.349 | 3.458  | -2.239 | 0.039 | 0.163 | -4.071 |
| 5430430K15Rik | -0.345 | 3.345  | -2.239 | 0.039 | 0.163 | -4.071 |
| 1700111E14Rik | -0.284 | 2.773  | -2.239 | 0.039 | 0.163 | -4.071 |
| AI429214      | -0.409 | 5.521  | -2.239 | 0.039 | 0.163 | -4.071 |
| Rin1          | 0.534  | 3.866  | 2.239  | 0.039 | 0.163 | -4.071 |
| Arhgef1       | 0.561  | 8.215  | 2.239  | 0.039 | 0.163 | -4.072 |
| 4921504E06Rik | -0.391 | 3.200  | -2.238 | 0.039 | 0.163 | -4.072 |
| Klh135        | -0.318 | 3.353  | -2.238 | 0.039 | 0.163 | -4.072 |
| Stk33         | -0.297 | 2.706  | -2.238 | 0.039 | 0.163 | -4.072 |
| Prkg2         | -0.317 | 3.195  | -2.238 | 0.039 | 0.163 | -4.072 |
| H6pd          | 0.435  | 9.013  | 2.238  | 0.039 | 0.163 | -4.073 |
| Gml1992       | -0.241 | 2.299  | -2.237 | 0.039 | 0.164 | -4.074 |
| Polb          | 0.940  | 5.940  | 2.237  | 0.039 | 0.164 | -4.074 |
| Folh1         | -0.258 | 2.313  | -2.237 | 0.039 | 0.164 | -4.074 |
| Zfp775        | -0.426 | 3.272  | -2.237 | 0.039 | 0.164 | -4.074 |
| Gm4943        | -0.401 | 10.482 | -2.237 | 0.039 | 0.164 | -4.075 |
| Trim72        | -0.374 | 3.667  | -2.237 | 0.039 | 0.164 | -4.075 |
| Sema6c        | -0.389 | 5.890  | -2.236 | 0.039 | 0.164 | -4.076 |
| A430107P09Rik | -0.324 | 2.818  | -2.236 | 0.039 | 0.164 | -4.077 |
| Armc5         | 0.337  | 6.612  | 2.236  | 0.039 | 0.164 | -4.077 |
| Foxn4         | -0.399 | 5.861  | -2.236 | 0.039 | 0.164 | -4.077 |
| 5730488B01Rik | -0.310 | 4.182  | -2.235 | 0.039 | 0.164 | -4.077 |
| Tap1          | 2.223  | 8.824  | 2.235  | 0.039 | 0.164 | -4.077 |
| Ephx1         | -0.571 | 7.849  | -2.235 | 0.039 | 0.164 | -4.077 |
| Tmem91        | -0.359 | 3.716  | -2.235 | 0.039 | 0.164 | -4.077 |
| 2310058N22Rik | 0.971  | 5.656  | 2.235  | 0.039 | 0.164 | -4.077 |
| 9130221L21Rik | 1.370  | 5.831  | 2.235  | 0.039 | 0.164 | -4.078 |
| Ktn1          | -0.246 | 2.340  | -2.235 | 0.039 | 0.164 | -4.078 |
| Rdh11         | -0.772 | 6.340  | -2.235 | 0.039 | 0.164 | -4.078 |
| Pck2          | 0.738  | 6.705  | 2.235  | 0.039 | 0.164 | -4.079 |
| Gnrhr         | -0.337 | 2.587  | -2.234 | 0.039 | 0.164 | -4.079 |
| Glyr1         | 0.443  | 9.430  | 2.234  | 0.039 | 0.164 | -4.080 |
| 8030494B02Rik | 1.226  | 4.506  | 2.233  | 0.039 | 0.164 | -4.081 |
| Dync2h1       | -0.269 | 5.663  | -2.233 | 0.039 | 0.164 | -4.081 |
| Lims2         | -0.513 | 5.446  | -2.233 | 0.039 | 0.164 | -4.082 |
| Pwp2          | 0.328  | 6.926  | 2.233  | 0.039 | 0.164 | -4.082 |
| Nkain4        | -0.411 | 5.993  | -2.233 | 0.039 | 0.164 | -4.082 |
| Atg4a         | -0.457 | 7.213  | -2.232 | 0.039 | 0.164 | -4.082 |
| Nox4          | -0.338 | 2.749  | -2.232 | 0.039 | 0.164 | -4.083 |
| AU022186      | -0.372 | 3.057  | -2.232 | 0.039 | 0.164 | -4.083 |
| Phgr1         | 0.643  | 8.475  | 2.232  | 0.039 | 0.164 | -4.083 |
| Oaf           | 0.592  | 6.763  | 2.231  | 0.039 | 0.165 | -4.084 |
| Tlx3          | -0.425 | 4.574  | -2.231 | 0.039 | 0.165 | -4.084 |
| Mlst8         | -0.261 | 6.793  | -2.231 | 0.039 | 0.165 | -4.085 |
| Nedd1         | -0.543 | 5.819  | -2.230 | 0.039 | 0.165 | -4.086 |
| Theg          | -0.436 | 4.013  | -2.230 | 0.039 | 0.165 | -4.086 |
| Fbxl18        | -0.692 | 5.584  | -2.230 | 0.039 | 0.165 | -4.087 |

|                |        |        |        |       |       |        |
|----------------|--------|--------|--------|-------|-------|--------|
| Tmem143        | -0.283 | 4.239  | -2.230 | 0.039 | 0.165 | -4.087 |
| Fam71f1        | -0.452 | 5.443  | -2.230 | 0.039 | 0.165 | -4.087 |
| Cacnalb        | -0.269 | 5.287  | -2.229 | 0.039 | 0.165 | -4.088 |
| Apcdd1         | -0.293 | 3.299  | -2.229 | 0.039 | 0.165 | -4.088 |
| 5830434F19Rik  | -0.304 | 3.007  | -2.229 | 0.039 | 0.165 | -4.088 |
| Sardh          | -0.449 | 6.060  | -2.229 | 0.039 | 0.165 | -4.089 |
| Magt1          | -0.598 | 8.252  | -2.229 | 0.039 | 0.165 | -4.089 |
| Gpatch21       | -0.342 | 6.590  | -2.229 | 0.039 | 0.165 | -4.089 |
| Coprs          | -0.624 | 6.755  | -2.228 | 0.039 | 0.165 | -4.090 |
| Sec11a         | 0.388  | 10.305 | 2.228  | 0.039 | 0.165 | -4.090 |
| Prdx5          | -0.550 | 10.203 | -2.228 | 0.039 | 0.165 | -4.090 |
| 1700066C05Rik  | -0.376 | 3.243  | -2.228 | 0.039 | 0.165 | -4.091 |
| Ube2u          | -0.367 | 3.176  | -2.227 | 0.039 | 0.165 | -4.091 |
| Ipo4           | 0.479  | 8.510  | 2.227  | 0.039 | 0.165 | -4.091 |
| Olf1r558       | -0.271 | 3.670  | -2.227 | 0.039 | 0.165 | -4.091 |
| Zfyve28        | -0.303 | 4.288  | -2.227 | 0.039 | 0.165 | -4.092 |
| Tram1          | -0.271 | 11.058 | -2.227 | 0.039 | 0.165 | -4.092 |
| Gm10796        | -0.349 | 3.509  | -2.227 | 0.039 | 0.165 | -4.092 |
| Scn5a          | -0.343 | 3.892  | -2.227 | 0.040 | 0.165 | -4.092 |
| Klf13          | 0.837  | 7.326  | 2.227  | 0.040 | 0.165 | -4.092 |
| D730005E14Rik  | 0.653  | 4.866  | 2.226  | 0.040 | 0.165 | -4.093 |
| Cd1d1          | 0.934  | 4.243  | 2.226  | 0.040 | 0.165 | -4.093 |
| Msemb          | -0.299 | 2.667  | -2.226 | 0.040 | 0.165 | -4.093 |
| Gm16055        | -0.313 | 3.423  | -2.226 | 0.040 | 0.165 | -4.093 |
| 4930519D14Rik  | -0.442 | 3.807  | -2.226 | 0.040 | 0.165 | -4.093 |
| Tmem254a       | -0.634 | 9.488  | -2.226 | 0.040 | 0.165 | -4.094 |
| Cnp            | 0.793  | 7.604  | 2.225  | 0.040 | 0.166 | -4.095 |
| Ptbp3          | 0.395  | 6.248  | 2.225  | 0.040 | 0.166 | -4.095 |
| C2cd4c         | -0.535 | 4.665  | -2.225 | 0.040 | 0.166 | -4.096 |
| Zfp786         | -0.305 | 3.463  | -2.225 | 0.040 | 0.166 | -4.096 |
| AK079263       | 0.755  | 4.607  | 2.224  | 0.040 | 0.166 | -4.097 |
| C76614         | -0.292 | 3.451  | -2.224 | 0.040 | 0.166 | -4.097 |
| Nr2c2          | -0.644 | 5.036  | -2.224 | 0.040 | 0.166 | -4.097 |
| 1700049E17Rik1 | -0.424 | 3.219  | -2.224 | 0.040 | 0.166 | -4.098 |
| Slc22a2        | -0.349 | 3.191  | -2.223 | 0.040 | 0.166 | -4.098 |
| Kif1b          | -0.325 | 8.939  | -2.223 | 0.040 | 0.166 | -4.098 |
| Abi2           | -0.486 | 4.432  | -2.223 | 0.040 | 0.166 | -4.098 |
| Gm9898         | -0.261 | 2.507  | -2.223 | 0.040 | 0.166 | -4.098 |
| Jam3           | -0.386 | 4.082  | -2.223 | 0.040 | 0.166 | -4.099 |
| Rbm18          | -0.499 | 5.948  | -2.223 | 0.040 | 0.166 | -4.099 |
| Gm8618         | 0.248  | 12.639 | 2.222  | 0.040 | 0.166 | -4.100 |
| Syvn1          | 0.281  | 8.577  | 2.222  | 0.040 | 0.166 | -4.101 |
| Mut            | -0.447 | 8.896  | -2.221 | 0.040 | 0.166 | -4.102 |
| 2310015A10Rik  | -0.343 | 4.506  | -2.221 | 0.040 | 0.166 | -4.102 |
| Ddo            | -1.478 | 5.884  | -2.221 | 0.040 | 0.166 | -4.102 |
| Cc2d2b         | -0.247 | 2.830  | -2.221 | 0.040 | 0.166 | -4.103 |
| Prdm15         | 0.465  | 5.555  | 2.221  | 0.040 | 0.166 | -4.103 |
| Zfp558         | -0.305 | 2.437  | -2.221 | 0.040 | 0.166 | -4.103 |
| Lemd1          | 0.509  | 3.721  | 2.220  | 0.040 | 0.166 | -4.104 |
| Myo15b         | 0.611  | 7.970  | 2.220  | 0.040 | 0.167 | -4.104 |

|               |        |       |        |       |       |        |
|---------------|--------|-------|--------|-------|-------|--------|
| 5230400M03Rik | 0.697  | 4.769 | 2.219  | 0.040 | 0.167 | -4.105 |
| Gm16630       | -0.461 | 3.604 | -2.219 | 0.040 | 0.167 | -4.106 |
| Fam89a        | -0.341 | 3.553 | -2.219 | 0.040 | 0.167 | -4.106 |
| 1700026H06Rik | -0.275 | 2.815 | -2.218 | 0.040 | 0.167 | -4.107 |
| Dcaf17        | -0.529 | 6.495 | -2.218 | 0.040 | 0.167 | -4.107 |
| Zkscan1       | -0.363 | 8.432 | -2.218 | 0.040 | 0.167 | -4.108 |
| Zfp882        | -0.305 | 2.778 | -2.218 | 0.040 | 0.167 | -4.108 |
| Slc51a        | -0.442 | 4.310 | -2.217 | 0.040 | 0.167 | -4.109 |
| Mtmr10        | -0.272 | 7.270 | -2.217 | 0.040 | 0.167 | -4.109 |
| 1700113H08Rik | -0.411 | 3.833 | -2.217 | 0.040 | 0.167 | -4.109 |
| Cyfip2        | 0.841  | 4.411 | 2.216  | 0.040 | 0.167 | -4.110 |
| Prpf40a       | 0.549  | 7.079 | 2.216  | 0.040 | 0.167 | -4.111 |
| Isynal        | -0.678 | 7.680 | -2.216 | 0.040 | 0.167 | -4.111 |
| 4632415L05Rik | -0.388 | 3.215 | -2.216 | 0.040 | 0.167 | -4.111 |
| Phf2          | -0.357 | 5.205 | -2.216 | 0.040 | 0.167 | -4.112 |
| Tmem156       | 0.407  | 3.838 | 2.216  | 0.040 | 0.167 | -4.112 |
| Pgls          | 0.283  | 9.151 | 2.216  | 0.040 | 0.167 | -4.112 |
| Clqtnf7       | -0.359 | 3.153 | -2.215 | 0.040 | 0.168 | -4.113 |
| A930013F10Rik | 1.161  | 4.281 | 2.215  | 0.040 | 0.168 | -4.113 |
| Hmgcl11       | -0.452 | 3.680 | -2.215 | 0.040 | 0.168 | -4.113 |
| Mir1931       | 1.334  | 5.606 | 2.215  | 0.040 | 0.168 | -4.113 |
| AU023762      | -0.304 | 3.189 | -2.214 | 0.041 | 0.168 | -4.114 |
| LOC100047123  | -0.441 | 5.145 | -2.214 | 0.041 | 0.168 | -4.115 |
| Nup37         | 0.679  | 7.411 | 2.214  | 0.041 | 0.168 | -4.115 |
| 4930424E08Rik | -0.347 | 3.518 | -2.214 | 0.041 | 0.168 | -4.115 |
| Gm5142        | -0.533 | 3.904 | -2.214 | 0.041 | 0.168 | -4.115 |
| 1700001F09Rik | -0.301 | 2.472 | -2.213 | 0.041 | 0.168 | -4.116 |
| 2310061I04Rik | -0.306 | 9.321 | -2.213 | 0.041 | 0.168 | -4.116 |
| 1600025M17Rik | -0.358 | 2.919 | -2.213 | 0.041 | 0.168 | -4.116 |
| 0610010B08Rik | 0.485  | 5.153 | 2.213  | 0.041 | 0.168 | -4.116 |
| Pnpla7        | 0.651  | 6.258 | 2.213  | 0.041 | 0.168 | -4.117 |
| Pir           | 0.565  | 7.147 | 2.213  | 0.041 | 0.168 | -4.117 |
| Msl2          | 0.562  | 5.786 | 2.212  | 0.041 | 0.168 | -4.117 |
| Tmem8c        | -0.382 | 3.069 | -2.212 | 0.041 | 0.168 | -4.118 |
| Pcyox1        | -0.277 | 8.398 | -2.212 | 0.041 | 0.168 | -4.118 |
| Layn          | -0.496 | 5.046 | -2.212 | 0.041 | 0.168 | -4.118 |
| S100a10       | 1.248  | 8.787 | 2.211  | 0.041 | 0.168 | -4.119 |
| 1700020G03Rik | -0.556 | 3.838 | -2.211 | 0.041 | 0.168 | -4.121 |
| Cox20         | -0.473 | 9.835 | -2.211 | 0.041 | 0.168 | -4.121 |
| Nudt4         | -0.432 | 7.032 | -2.210 | 0.041 | 0.169 | -4.121 |
| Ankfy1        | 0.326  | 9.132 | 2.210  | 0.041 | 0.169 | -4.121 |
| Ccdc183       | -0.264 | 3.009 | -2.210 | 0.041 | 0.169 | -4.122 |
| Pabpc4        | 0.425  | 8.369 | 2.209  | 0.041 | 0.169 | -4.124 |
| Vps41         | -0.236 | 7.995 | -2.208 | 0.041 | 0.169 | -4.124 |
| Mcf21         | 0.574  | 8.707 | 2.208  | 0.041 | 0.169 | -4.125 |
| 10-Mar        | -0.366 | 6.097 | -2.208 | 0.041 | 0.169 | -4.125 |
| Areg          | 1.567  | 7.971 | 2.208  | 0.041 | 0.169 | -4.125 |
| Gdpd5         | -0.437 | 7.547 | -2.208 | 0.041 | 0.169 | -4.125 |
| Incenp        | 0.482  | 7.256 | 2.208  | 0.041 | 0.169 | -4.125 |
| Mfap4         | -0.566 | 5.690 | -2.208 | 0.041 | 0.169 | -4.126 |

|               |        |        |        |       |       |        |
|---------------|--------|--------|--------|-------|-------|--------|
| Spert         | -0.298 | 4.676  | -2.208 | 0.041 | 0.169 | -4.126 |
| 5930427J20Rik | -0.353 | 4.292  | -2.207 | 0.041 | 0.169 | -4.127 |
| Csnls2a       | -0.325 | 2.490  | -2.207 | 0.041 | 0.169 | -4.127 |
| Eid3          | -0.284 | 2.495  | -2.207 | 0.041 | 0.169 | -4.127 |
| B130019D13Rik | 0.295  | 4.381  | 2.207  | 0.041 | 0.169 | -4.127 |
| Cog1          | -0.283 | 8.146  | -2.206 | 0.041 | 0.169 | -4.128 |
| Ap3b2         | -0.272 | 4.762  | -2.206 | 0.041 | 0.169 | -4.128 |
| 4933437G19Rik | -0.321 | 3.141  | -2.206 | 0.041 | 0.169 | -4.129 |
| Pitpnm2os1    | -0.444 | 5.398  | -2.206 | 0.041 | 0.169 | -4.129 |
| Mlh1          | 0.254  | 6.946  | 2.206  | 0.041 | 0.169 | -4.129 |
| Nckap5        | -0.433 | 3.276  | -2.206 | 0.041 | 0.169 | -4.129 |
| Mpc2          | -0.437 | 10.243 | -2.205 | 0.041 | 0.169 | -4.130 |
| 9630021D06Rik | -0.308 | 2.521  | -2.205 | 0.041 | 0.170 | -4.130 |
| Atp6v1d       | -0.327 | 10.191 | -2.205 | 0.041 | 0.170 | -4.131 |
| Cdrt4         | -0.407 | 4.311  | -2.204 | 0.041 | 0.170 | -4.131 |
| B830007D08Rik | 1.419  | 4.302  | 2.204  | 0.041 | 0.170 | -4.132 |
| I133          | 0.857  | 10.266 | 2.204  | 0.041 | 0.170 | -4.132 |
| Pnpo          | -0.297 | 8.781  | -2.204 | 0.041 | 0.170 | -4.132 |
| Ppfia3        | -0.511 | 4.909  | -2.204 | 0.041 | 0.170 | -4.133 |
| Hscb          | -0.514 | 6.870  | -2.203 | 0.041 | 0.170 | -4.133 |
| 4930432009Rik | -0.254 | 2.711  | -2.203 | 0.041 | 0.170 | -4.134 |
| D230038C21    | -0.325 | 2.988  | -2.203 | 0.041 | 0.170 | -4.134 |
| Chchd2        | -0.293 | 11.892 | -2.203 | 0.041 | 0.170 | -4.134 |
| Gcnt3         | 0.372  | 9.633  | 2.203  | 0.041 | 0.170 | -4.134 |
| Crybg3        | 0.310  | 7.673  | 2.203  | 0.041 | 0.170 | -4.135 |
| Krtap19-1     | -0.456 | 5.115  | -2.202 | 0.041 | 0.170 | -4.135 |
| Ceacam2       | -0.361 | 5.717  | -2.202 | 0.041 | 0.170 | -4.135 |
| Rassf7        | 0.334  | 8.729  | 2.202  | 0.041 | 0.170 | -4.135 |
| Mlk1          | 1.059  | 8.271  | 2.202  | 0.042 | 0.170 | -4.136 |
| Inpp5e        | -0.433 | 5.809  | -2.201 | 0.042 | 0.170 | -4.137 |
| AU015536      | 2.182  | 7.055  | 2.201  | 0.042 | 0.170 | -4.137 |
| Gm11757       | -0.374 | 3.922  | -2.201 | 0.042 | 0.170 | -4.137 |
| Mertk         | 0.477  | 5.621  | 2.201  | 0.042 | 0.170 | -4.137 |
| Vdr           | 0.669  | 4.893  | 2.201  | 0.042 | 0.170 | -4.138 |
| Zfp874b       | -0.392 | 3.322  | -2.200 | 0.042 | 0.170 | -4.139 |
| Gm19784       | -0.328 | 4.046  | -2.200 | 0.042 | 0.170 | -4.139 |
| Cdc3711       | 0.299  | 7.247  | 2.200  | 0.042 | 0.171 | -4.140 |
| Rcan1         | -0.545 | 8.487  | -2.199 | 0.042 | 0.171 | -4.141 |
| 2810404M03Rik | 0.337  | 2.800  | 2.199  | 0.042 | 0.171 | -4.141 |
| Smpd13a       | 0.223  | 11.160 | 2.199  | 0.042 | 0.171 | -4.141 |
| Defb2         | -0.367 | 4.340  | -2.199 | 0.042 | 0.171 | -4.142 |
| D4Ertd58e     | -0.254 | 3.058  | -2.199 | 0.042 | 0.171 | -4.142 |
| D830039M14Rik | -0.309 | 3.103  | -2.198 | 0.042 | 0.171 | -4.142 |
| Taf15         | 1.434  | 4.817  | 2.198  | 0.042 | 0.171 | -4.142 |
| C130050018Rik | -0.440 | 3.510  | -2.198 | 0.042 | 0.171 | -4.143 |
| A830082K12Rik | -0.325 | 4.205  | -2.198 | 0.042 | 0.171 | -4.143 |
| Cops8         | 0.406  | 8.400  | 2.198  | 0.042 | 0.171 | -4.143 |
| Eid2          | -0.405 | 6.051  | -2.198 | 0.042 | 0.171 | -4.143 |
| Gm15886       | -0.389 | 2.782  | -2.198 | 0.042 | 0.171 | -4.143 |
| Gins3         | -0.416 | 5.539  | -2.198 | 0.042 | 0.171 | -4.143 |

|               |        |        |        |       |       |        |
|---------------|--------|--------|--------|-------|-------|--------|
| A830082K12Rik | -0.477 | 4.241  | -2.198 | 0.042 | 0.171 | -4.143 |
| Tlr9          | -0.328 | 5.620  | -2.197 | 0.042 | 0.171 | -4.144 |
| 4933432I09Rik | -0.324 | 5.171  | -2.197 | 0.042 | 0.171 | -4.144 |
| A930003A15Rik | -0.314 | 2.893  | -2.197 | 0.042 | 0.171 | -4.145 |
| Gm14743       | -0.307 | 2.554  | -2.195 | 0.042 | 0.171 | -4.147 |
| Mogat1        | -1.244 | 10.635 | -2.195 | 0.042 | 0.171 | -4.147 |
| Acss1         | 0.464  | 9.917  | 2.195  | 0.042 | 0.171 | -4.148 |
| Tomm34        | 0.305  | 7.865  | 2.195  | 0.042 | 0.171 | -4.148 |
| E530011L22Rik | -0.351 | 5.082  | -2.195 | 0.042 | 0.171 | -4.148 |
| Gm10817       | -0.360 | 2.910  | -2.195 | 0.042 | 0.171 | -4.148 |
| Rpl31         | 0.552  | 8.332  | 2.195  | 0.042 | 0.171 | -4.149 |
| Gm10421       | -0.333 | 4.468  | -2.194 | 0.042 | 0.171 | -4.149 |
| C78859        | -0.386 | 4.590  | -2.194 | 0.042 | 0.171 | -4.149 |
| Zfp276        | 0.629  | 5.827  | 2.194  | 0.042 | 0.171 | -4.149 |
| Dkk1          | -0.391 | 3.519  | -2.194 | 0.042 | 0.171 | -4.149 |
| Rasgef1a      | -0.282 | 2.385  | -2.194 | 0.042 | 0.171 | -4.149 |
| Rasgef1b      | -0.423 | 8.402  | -2.194 | 0.042 | 0.171 | -4.149 |
| F13a1         | -0.468 | 4.098  | -2.194 | 0.042 | 0.171 | -4.150 |
| Dgkk          | -0.233 | 2.774  | -2.193 | 0.042 | 0.172 | -4.151 |
| Espn          | -0.775 | 5.338  | -2.193 | 0.042 | 0.172 | -4.151 |
| Stap1         | -0.321 | 3.684  | -2.192 | 0.042 | 0.172 | -4.152 |
| Cysltrl       | -0.308 | 2.914  | -2.192 | 0.042 | 0.172 | -4.153 |
| Lrrc47        | 0.337  | 8.552  | 2.192  | 0.042 | 0.172 | -4.153 |
| St13          | -0.545 | 5.304  | -2.192 | 0.042 | 0.172 | -4.153 |
| Zcchc14       | 0.242  | 6.634  | 2.192  | 0.042 | 0.172 | -4.154 |
| Lhxlos        | -0.366 | 2.713  | -2.192 | 0.042 | 0.172 | -4.154 |
| Defb6         | -0.323 | 3.057  | -2.191 | 0.042 | 0.172 | -4.155 |
| Eif3d         | 0.382  | 10.283 | 2.191  | 0.042 | 0.172 | -4.155 |
| Rpl35         | 0.267  | 12.246 | 2.191  | 0.042 | 0.172 | -4.155 |
| Panx1         | 0.371  | 7.321  | 2.191  | 0.042 | 0.172 | -4.155 |
| 4932702P03Rik | -0.362 | 4.668  | -2.191 | 0.042 | 0.172 | -4.155 |
| Ppplr17       | -0.272 | 2.713  | -2.191 | 0.042 | 0.172 | -4.155 |
| Larp4b        | 0.289  | 10.336 | 2.190  | 0.042 | 0.172 | -4.156 |
| Manba         | 0.212  | 8.299  | 2.190  | 0.042 | 0.172 | -4.156 |
| Idua          | -0.290 | 6.259  | -2.190 | 0.043 | 0.172 | -4.157 |
| Aamp          | 0.188  | 9.940  | 2.190  | 0.043 | 0.172 | -4.157 |
| Rfxank        | -0.492 | 6.558  | -2.190 | 0.043 | 0.172 | -4.157 |
| Zmat5         | -0.462 | 6.998  | -2.190 | 0.043 | 0.172 | -4.157 |
| 4932432N04Rik | -0.297 | 3.054  | -2.190 | 0.043 | 0.172 | -4.157 |
| Tril          | -0.488 | 3.327  | -2.189 | 0.043 | 0.172 | -4.157 |
| Pdlim4        | -1.514 | 8.130  | -2.189 | 0.043 | 0.172 | -4.158 |
| D8Ertd56e     | -0.270 | 2.774  | -2.189 | 0.043 | 0.172 | -4.158 |
| Ldlr          | 0.579  | 9.628  | 2.189  | 0.043 | 0.172 | -4.158 |
| Csnk1g1       | 0.274  | 6.812  | 2.189  | 0.043 | 0.172 | -4.158 |
| Sumf1         | 0.380  | 7.335  | 2.189  | 0.043 | 0.172 | -4.158 |
| Ccnj          | 0.608  | 3.922  | 2.189  | 0.043 | 0.172 | -4.158 |
| Srbd1         | -0.316 | 6.698  | -2.189 | 0.043 | 0.172 | -4.158 |
| 2410004P03Rik | -0.321 | 4.085  | -2.189 | 0.043 | 0.172 | -4.158 |
| Nin1          | 0.506  | 2.958  | 2.189  | 0.043 | 0.172 | -4.159 |
| LOC553096     | 1.320  | 6.722  | 2.189  | 0.043 | 0.172 | -4.159 |

|               |        |        |        |       |       |        |
|---------------|--------|--------|--------|-------|-------|--------|
| Top2b         | 0.256  | 8.425  | 2.189  | 0.043 | 0.172 | -4.159 |
| Zfp825        | -0.358 | 5.972  | -2.189 | 0.043 | 0.172 | -4.159 |
| 1700012B09Rik | -0.347 | 3.136  | -2.188 | 0.043 | 0.172 | -4.159 |
| Slfn5os       | -0.338 | 4.251  | -2.188 | 0.043 | 0.172 | -4.160 |
| Dnm3          | -0.273 | 3.475  | -2.188 | 0.043 | 0.172 | -4.160 |
| Mad211        | 0.616  | 7.787  | 2.188  | 0.043 | 0.172 | -4.161 |
| Limk2         | -0.312 | 7.369  | -2.188 | 0.043 | 0.172 | -4.161 |
| Gm20300       | -0.685 | 7.447  | -2.188 | 0.043 | 0.172 | -4.161 |
| Xpo6          | 0.279  | 8.268  | 2.188  | 0.043 | 0.172 | -4.161 |
| Tmem218       | -0.610 | 5.622  | -2.187 | 0.043 | 0.172 | -4.161 |
| Tpp1          | -0.328 | 7.975  | -2.187 | 0.043 | 0.172 | -4.161 |
| Ubxn2a        | -1.437 | 7.753  | -2.187 | 0.043 | 0.173 | -4.162 |
| Slc6a16       | -0.283 | 3.050  | -2.186 | 0.043 | 0.173 | -4.163 |
| Pelo          | 0.314  | 6.448  | 2.186  | 0.043 | 0.173 | -4.164 |
| Akr1c12       | -0.329 | 11.186 | -2.186 | 0.043 | 0.173 | -4.164 |
| D1Ertd218e    | -0.265 | 2.607  | -2.186 | 0.043 | 0.173 | -4.164 |
| Ptchd4        | -0.394 | 2.730  | -2.185 | 0.043 | 0.173 | -4.165 |
| Cdc20         | 0.659  | 8.379  | 2.185  | 0.043 | 0.173 | -4.165 |
| Traf3ipl      | 0.382  | 5.265  | 2.185  | 0.043 | 0.173 | -4.166 |
| Pitx3         | -0.359 | 4.368  | -2.185 | 0.043 | 0.173 | -4.166 |
| Mettl5os      | -0.292 | 2.769  | -2.184 | 0.043 | 0.173 | -4.166 |
| Elavl2        | -0.330 | 3.191  | -2.184 | 0.043 | 0.173 | -4.166 |
| Mboat2        | -0.806 | 8.896  | -2.184 | 0.043 | 0.173 | -4.167 |
| Psmc5         | 0.285  | 10.283 | 2.184  | 0.043 | 0.173 | -4.167 |
| Mov10         | 0.917  | 6.646  | 2.184  | 0.043 | 0.173 | -4.167 |
| Pdhx          | -0.401 | 7.308  | -2.184 | 0.043 | 0.173 | -4.167 |
| Qrfpr         | -0.273 | 2.303  | -2.184 | 0.043 | 0.173 | -4.168 |
| Sftpal        | -0.345 | 3.292  | -2.184 | 0.043 | 0.173 | -4.168 |
| Nav1          | 0.543  | 6.414  | 2.183  | 0.043 | 0.173 | -4.169 |
| C79256        | -0.233 | 2.175  | -2.183 | 0.043 | 0.173 | -4.169 |
| Ubfd1         | -0.365 | 5.958  | -2.183 | 0.043 | 0.173 | -4.169 |
| Dcun1d5       | 0.443  | 7.902  | 2.182  | 0.043 | 0.173 | -4.170 |
| Slc7a6        | 0.325  | 7.033  | 2.182  | 0.043 | 0.174 | -4.171 |
| Snai2         | 0.355  | 4.683  | 2.182  | 0.043 | 0.174 | -4.171 |
| Gpr115        | -0.344 | 2.568  | -2.182 | 0.043 | 0.174 | -4.171 |
| Tekt2         | -0.397 | 3.581  | -2.181 | 0.043 | 0.174 | -4.171 |
| Rnf34         | -0.315 | 7.505  | -2.181 | 0.043 | 0.174 | -4.171 |
| Olfr66        | -0.323 | 3.562  | -2.181 | 0.043 | 0.174 | -4.172 |
| Acyp1         | -0.585 | 6.944  | -2.181 | 0.043 | 0.174 | -4.172 |
| AA386476      | 0.942  | 4.394  | 2.180  | 0.043 | 0.174 | -4.173 |
| 9630013A20Rik | -0.252 | 2.253  | -2.180 | 0.043 | 0.174 | -4.173 |
| Igkv5-39      | 0.424  | 2.794  | 2.180  | 0.043 | 0.174 | -4.174 |
| 2810013P06Rik | -0.394 | 4.648  | -2.180 | 0.043 | 0.174 | -4.174 |
| 4833403J16Rik | -0.352 | 2.515  | -2.180 | 0.043 | 0.174 | -4.175 |
| AU022238      | -0.365 | 6.162  | -2.179 | 0.043 | 0.174 | -4.176 |
| A830021M18Rik | -0.300 | 2.588  | -2.179 | 0.043 | 0.174 | -4.176 |
| Mat2a         | 0.566  | 10.848 | 2.179  | 0.043 | 0.174 | -4.176 |
| Dus11         | 0.400  | 8.212  | 2.179  | 0.043 | 0.174 | -4.176 |
| 4933404G15Rik | -0.327 | 3.936  | -2.179 | 0.043 | 0.174 | -4.176 |
| Arl4a         | -0.386 | 3.411  | -2.178 | 0.043 | 0.174 | -4.177 |

|               |        |        |        |       |       |        |
|---------------|--------|--------|--------|-------|-------|--------|
| Pnlcd1        | -0.331 | 4.201  | -2.178 | 0.043 | 0.174 | -4.177 |
| 4930405H06Rik | -0.374 | 3.511  | -2.178 | 0.043 | 0.174 | -4.177 |
| Pdc12         | -0.216 | 2.279  | -2.178 | 0.044 | 0.174 | -4.177 |
| 5730405A17Rik | -0.416 | 4.577  | -2.178 | 0.044 | 0.174 | -4.178 |
| LOC102631806  | -0.386 | 3.018  | -2.178 | 0.044 | 0.174 | -4.178 |
| Tprgl         | -0.338 | 10.096 | -2.178 | 0.044 | 0.174 | -4.178 |
| Usp13         | -0.268 | 4.219  | -2.178 | 0.044 | 0.174 | -4.178 |
| 4930505020Rik | -0.376 | 3.738  | -2.177 | 0.044 | 0.174 | -4.178 |
| Stat5a        | -0.518 | 7.594  | -2.177 | 0.044 | 0.174 | -4.179 |
| 4933402E13Rik | -0.289 | 2.578  | -2.177 | 0.044 | 0.174 | -4.179 |
| H2-Ke6        | -0.528 | 7.432  | -2.177 | 0.044 | 0.174 | -4.179 |
| Hist1h2bc     | -0.647 | 10.362 | -2.177 | 0.044 | 0.174 | -4.179 |
| Wdr4          | 0.606  | 6.323  | 2.177  | 0.044 | 0.174 | -4.179 |
| Mcm9          | -0.338 | 3.497  | -2.177 | 0.044 | 0.174 | -4.180 |
| Rab2a         | -0.251 | 10.550 | -2.176 | 0.044 | 0.174 | -4.180 |
| Tbkbp1        | -0.344 | 5.252  | -2.176 | 0.044 | 0.174 | -4.180 |
| A230057D06Rik | -0.289 | 2.558  | -2.176 | 0.044 | 0.174 | -4.181 |
| Pde10a        | -0.265 | 5.656  | -2.176 | 0.044 | 0.174 | -4.181 |
| Erh           | 0.354  | 9.698  | 2.176  | 0.044 | 0.174 | -4.181 |
| Ackr2         | -0.349 | 4.049  | -2.176 | 0.044 | 0.174 | -4.181 |
| Cntd1         | -0.291 | 4.156  | -2.176 | 0.044 | 0.174 | -4.181 |
| AF067061      | -0.316 | 4.709  | -2.176 | 0.044 | 0.174 | -4.181 |
| Cnpy1         | -0.247 | 2.328  | -2.175 | 0.044 | 0.175 | -4.182 |
| 4930599N24Rik | -0.291 | 2.943  | -2.175 | 0.044 | 0.175 | -4.183 |
| Ccdc89        | -0.380 | 2.856  | -2.175 | 0.044 | 0.175 | -4.183 |
| AA517562      | -0.289 | 2.402  | -2.175 | 0.044 | 0.175 | -4.183 |
| Map3k3        | 0.355  | 6.652  | 2.175  | 0.044 | 0.175 | -4.183 |
| Pgrmc2        | -0.247 | 8.565  | -2.174 | 0.044 | 0.175 | -4.184 |
| Amdhd2        | 0.548  | 7.205  | 2.174  | 0.044 | 0.175 | -4.184 |
| Gzme          | -0.237 | 2.340  | -2.174 | 0.044 | 0.175 | -4.184 |
| Arhgap30      | 0.767  | 6.083  | 2.174  | 0.044 | 0.175 | -4.184 |
| Tnni1         | -0.366 | 4.557  | -2.174 | 0.044 | 0.175 | -4.185 |
| Cxcl9         | 2.795  | 7.316  | 2.173  | 0.044 | 0.175 | -4.185 |
| C130081A10Rik | 0.388  | 4.964  | 2.173  | 0.044 | 0.175 | -4.185 |
| Gm9757        | -0.350 | 3.208  | -2.173 | 0.044 | 0.175 | -4.186 |
| Map3k5        | -0.630 | 6.306  | -2.173 | 0.044 | 0.175 | -4.186 |
| Zfp133-ps     | -0.396 | 3.407  | -2.173 | 0.044 | 0.175 | -4.187 |
| Ccl27a        | -0.715 | 5.755  | -2.172 | 0.044 | 0.175 | -4.187 |
| Sae1          | 0.398  | 9.294  | 2.172  | 0.044 | 0.175 | -4.187 |
| Foxb2         | -0.390 | 3.996  | -2.172 | 0.044 | 0.175 | -4.188 |
| Cwf1911       | -0.402 | 4.468  | -2.172 | 0.044 | 0.175 | -4.188 |
| Slc7a3        | -0.356 | 3.652  | -2.172 | 0.044 | 0.175 | -4.188 |
| Lphn1         | -0.367 | 5.329  | -2.171 | 0.044 | 0.175 | -4.189 |
| Cenpw         | 0.797  | 5.763  | 2.171  | 0.044 | 0.175 | -4.189 |
| Dck           | -0.458 | 4.474  | -2.171 | 0.044 | 0.175 | -4.189 |
| AK013187      | -0.240 | 2.932  | -2.171 | 0.044 | 0.175 | -4.190 |
| Ctps2         | -0.228 | 2.781  | -2.171 | 0.044 | 0.175 | -4.190 |
| Esrra         | 0.863  | 6.248  | 2.170  | 0.044 | 0.175 | -4.191 |
| Polm          | 0.289  | 5.975  | 2.170  | 0.044 | 0.176 | -4.192 |
| Dxo           | 0.288  | 7.436  | 2.170  | 0.044 | 0.176 | -4.192 |

|               |        |        |        |       |       |        |
|---------------|--------|--------|--------|-------|-------|--------|
| D630013N20Rik | -0.285 | 3.113  | -2.169 | 0.044 | 0.176 | -4.192 |
| Fam47c        | -0.271 | 2.282  | -2.169 | 0.044 | 0.176 | -4.193 |
| Lamt0r3       | 0.213  | 9.892  | 2.169  | 0.044 | 0.176 | -4.193 |
| Tec           | 0.402  | 7.126  | 2.169  | 0.044 | 0.176 | -4.193 |
| Krt36         | -0.415 | 3.690  | -2.169 | 0.044 | 0.176 | -4.193 |
| Prame         | -0.339 | 3.738  | -2.167 | 0.044 | 0.176 | -4.196 |
| Crisp4        | -0.249 | 2.270  | -2.167 | 0.044 | 0.176 | -4.196 |
| 9630001P10Rik | -0.310 | 2.642  | -2.167 | 0.044 | 0.176 | -4.197 |
| Casp6         | -0.432 | 10.328 | -2.167 | 0.044 | 0.176 | -4.197 |
| Ndufv3        | -0.406 | 11.592 | -2.167 | 0.045 | 0.176 | -4.197 |
| Ndufv1        | -0.444 | 10.570 | -2.167 | 0.045 | 0.176 | -4.197 |
| Rgs1          | 0.691  | 4.764  | 2.166  | 0.045 | 0.176 | -4.198 |
| Ntn1          | -0.355 | 3.185  | -2.166 | 0.045 | 0.176 | -4.198 |
| Map2k6        | -0.387 | 5.724  | -2.166 | 0.045 | 0.176 | -4.199 |
| Kcnj16        | -2.745 | 7.022  | -2.166 | 0.045 | 0.176 | -4.199 |
| Gm13981       | 0.227  | 12.891 | 2.165  | 0.045 | 0.177 | -4.199 |
| Cngal         | -0.299 | 3.454  | -2.165 | 0.045 | 0.177 | -4.200 |
| Ccdc33        | -0.331 | 4.435  | -2.165 | 0.045 | 0.177 | -4.201 |
| Zfp575        | -0.413 | 6.362  | -2.164 | 0.045 | 0.177 | -4.201 |
| Tyrobp        | 1.272  | 6.692  | 2.164  | 0.045 | 0.177 | -4.201 |
| Rimkb         | -0.304 | 2.833  | -2.164 | 0.045 | 0.177 | -4.202 |
| Med13         | -0.637 | 4.010  | -2.164 | 0.045 | 0.177 | -4.202 |
| C920021L13Rik | -0.284 | 2.547  | -2.164 | 0.045 | 0.177 | -4.202 |
| Jph2          | -0.277 | 5.535  | -2.164 | 0.045 | 0.177 | -4.202 |
| Mfsd10        | 0.478  | 6.093  | 2.163  | 0.045 | 0.177 | -4.203 |
| 4632428N05Rik | 0.678  | 4.791  | 2.163  | 0.045 | 0.177 | -4.203 |
| Kdelc2        | 0.436  | 5.924  | 2.163  | 0.045 | 0.177 | -4.203 |
| Fnbp4         | 0.884  | 7.311  | 2.163  | 0.045 | 0.177 | -4.203 |
| Ppme1         | -0.241 | 8.146  | -2.163 | 0.045 | 0.177 | -4.203 |
| Tmem106c      | -0.251 | 6.714  | -2.163 | 0.045 | 0.177 | -4.204 |
| Rdh9          | 1.408  | 4.088  | 2.162  | 0.045 | 0.177 | -4.205 |
| Mia           | -0.637 | 6.162  | -2.162 | 0.045 | 0.177 | -4.205 |
| Iffo1         | -0.368 | 5.946  | -2.162 | 0.045 | 0.177 | -4.205 |
| LOC102635243  | -0.289 | 2.819  | -2.162 | 0.045 | 0.177 | -4.206 |
| 1700012P22Rik | -0.491 | 3.277  | -2.161 | 0.045 | 0.177 | -4.206 |
| Gpx4          | -0.321 | 10.612 | -2.161 | 0.045 | 0.177 | -4.206 |
| BC027072      | -0.434 | 3.387  | -2.161 | 0.045 | 0.178 | -4.207 |
| Ifrd1         | 0.630  | 8.044  | 2.160  | 0.045 | 0.178 | -4.208 |
| Pi4kb         | -0.451 | 4.555  | -2.160 | 0.045 | 0.178 | -4.208 |
| Zfp598        | 0.482  | 8.003  | 2.160  | 0.045 | 0.178 | -4.208 |
| Sipa111       | 0.554  | 6.412  | 2.160  | 0.045 | 0.178 | -4.208 |
| Ly6a          | 2.199  | 10.393 | 2.160  | 0.045 | 0.178 | -4.209 |
| Med16         | -0.515 | 8.186  | -2.160 | 0.045 | 0.178 | -4.209 |
| AU040320      | -0.425 | 6.208  | -2.160 | 0.045 | 0.178 | -4.209 |
| Rgs4          | -0.278 | 3.483  | -2.160 | 0.045 | 0.178 | -4.209 |
| Sypl          | -0.514 | 9.471  | -2.159 | 0.045 | 0.178 | -4.210 |
| Sts           | -0.400 | 7.250  | -2.159 | 0.045 | 0.178 | -4.210 |
| Frs2          | 0.312  | 7.558  | 2.159  | 0.045 | 0.178 | -4.210 |
| Rfx7          | 0.401  | 7.141  | 2.159  | 0.045 | 0.178 | -4.210 |
| Paip2b        | -0.518 | 7.328  | -2.159 | 0.045 | 0.178 | -4.210 |



|               |        |        |        |       |       |        |
|---------------|--------|--------|--------|-------|-------|--------|
| Rictor        | -0.339 | 3.039  | -2.159 | 0.045 | 0.178 | -4.211 |
| Serpnb7       | -0.291 | 2.353  | -2.159 | 0.045 | 0.178 | -4.211 |
| Nosl          | -0.391 | 4.079  | -2.159 | 0.045 | 0.178 | -4.211 |
| Slc39a7       | 0.491  | 8.938  | 2.159  | 0.045 | 0.178 | -4.211 |
| Figf          | 0.677  | 4.188  | 2.159  | 0.045 | 0.178 | -4.211 |
| Gstm4         | 0.372  | 6.554  | 2.158  | 0.045 | 0.178 | -4.211 |
| Olig1         | -0.319 | 3.304  | -2.158 | 0.045 | 0.178 | -4.211 |
| Lck           | 1.630  | 5.851  | 2.158  | 0.045 | 0.178 | -4.211 |
| Pet2          | -0.321 | 2.347  | -2.158 | 0.045 | 0.178 | -4.212 |
| Hoxb7         | -0.314 | 3.227  | -2.158 | 0.045 | 0.178 | -4.212 |
| Abcd2         | -0.325 | 2.865  | -2.158 | 0.045 | 0.178 | -4.212 |
| 2810416A17Rik | -0.286 | 2.950  | -2.157 | 0.045 | 0.178 | -4.213 |
| Gm9946        | -0.284 | 5.581  | -2.157 | 0.045 | 0.178 | -4.213 |
| Sprrla        | 1.352  | 10.492 | 2.157  | 0.045 | 0.178 | -4.214 |
| 2300004M11Rik | -0.334 | 3.613  | -2.157 | 0.045 | 0.178 | -4.214 |
| Sprr2a1       | 0.183  | 14.710 | 2.156  | 0.045 | 0.178 | -4.215 |
| LOC102633679  | -0.327 | 3.038  | -2.156 | 0.045 | 0.178 | -4.215 |
| Hectd3        | -0.262 | 6.347  | -2.156 | 0.045 | 0.178 | -4.216 |
| Gm3120        | -0.367 | 6.649  | -2.156 | 0.045 | 0.178 | -4.216 |
| Gm20548       | -0.366 | 2.908  | -2.156 | 0.045 | 0.178 | -4.216 |
| Bpifa2        | -0.271 | 2.809  | -2.156 | 0.045 | 0.178 | -4.216 |
| Rital         | -0.369 | 6.705  | -2.155 | 0.045 | 0.178 | -4.216 |
| Fzd5          | -0.303 | 5.897  | -2.155 | 0.045 | 0.178 | -4.216 |
| Adarb1        | -0.292 | 3.457  | -2.155 | 0.045 | 0.178 | -4.216 |
| Irf2          | 0.442  | 7.143  | 2.155  | 0.046 | 0.178 | -4.217 |
| Hif3a         | -0.383 | 3.696  | -2.155 | 0.046 | 0.178 | -4.217 |
| Zc3h7b        | -0.260 | 4.994  | -2.154 | 0.046 | 0.178 | -4.219 |
| Eif4g3        | 0.499  | 8.162  | 2.154  | 0.046 | 0.178 | -4.219 |
| Timp4         | -0.736 | 4.301  | -2.154 | 0.046 | 0.178 | -4.219 |
| Nt5m          | -0.271 | 7.158  | -2.154 | 0.046 | 0.178 | -4.219 |
| D5Erttd505e   | 1.454  | 4.865  | 2.154  | 0.046 | 0.178 | -4.220 |
| 1500035N22Rik | -0.397 | 5.406  | -2.154 | 0.046 | 0.178 | -4.220 |
| Kif9          | -0.372 | 4.731  | -2.154 | 0.046 | 0.178 | -4.220 |
| Wls           | -0.506 | 8.064  | -2.153 | 0.046 | 0.179 | -4.220 |
| Foxd3         | -0.344 | 3.827  | -2.153 | 0.046 | 0.179 | -4.220 |
| Col2a1        | -0.403 | 4.906  | -2.153 | 0.046 | 0.179 | -4.221 |
| Srp19         | 0.284  | 9.580  | 2.152  | 0.046 | 0.179 | -4.222 |
| Ifi30         | -0.218 | 11.089 | -2.152 | 0.046 | 0.179 | -4.222 |
| C130013H08Rik | -0.337 | 2.705  | -2.152 | 0.046 | 0.179 | -4.222 |
| Tbc1d32       | -0.688 | 6.545  | -2.152 | 0.046 | 0.179 | -4.222 |
| Mta3          | -0.439 | 7.570  | -2.152 | 0.046 | 0.179 | -4.222 |
| Irf9          | 0.852  | 7.267  | 2.152  | 0.046 | 0.179 | -4.223 |
| Klra5         | -0.423 | 3.146  | -2.152 | 0.046 | 0.179 | -4.223 |
| Cyp4b1        | -0.531 | 4.029  | -2.152 | 0.046 | 0.179 | -4.223 |
| LOC102632747  | -0.312 | 5.288  | -2.151 | 0.046 | 0.179 | -4.224 |
| 1700017D01Rik | -0.333 | 2.367  | -2.151 | 0.046 | 0.179 | -4.225 |
| Oxsr1         | 0.329  | 7.571  | 2.151  | 0.046 | 0.179 | -4.225 |
| Ido1          | 4.264  | 8.234  | 2.150  | 0.046 | 0.179 | -4.226 |
| Il17rc        | 0.517  | 8.716  | 2.149  | 0.046 | 0.179 | -4.227 |
| Llgl1         | 0.303  | 8.059  | 2.148  | 0.046 | 0.180 | -4.230 |

|               |        |        |        |       |       |        |
|---------------|--------|--------|--------|-------|-------|--------|
| Upk3b         | -0.371 | 3.802  | -2.148 | 0.046 | 0.180 | -4.230 |
| Tsga10        | -0.443 | 5.642  | -2.148 | 0.046 | 0.180 | -4.230 |
| Usp5          | 0.274  | 8.463  | 2.147  | 0.046 | 0.180 | -4.230 |
| AK047075      | -0.350 | 5.189  | -2.147 | 0.046 | 0.180 | -4.231 |
| Ptch2         | -0.241 | 4.001  | -2.147 | 0.046 | 0.180 | -4.231 |
| Def6          | 0.630  | 5.733  | 2.147  | 0.046 | 0.180 | -4.232 |
| 4930434B07Rik | -0.330 | 2.815  | -2.146 | 0.046 | 0.180 | -4.232 |
| Sectmlb       | -0.815 | 9.699  | -2.146 | 0.046 | 0.180 | -4.233 |
| Dact2         | -0.331 | 3.968  | -2.146 | 0.046 | 0.180 | -4.233 |
| Efcab2        | -0.491 | 4.889  | -2.146 | 0.046 | 0.180 | -4.234 |
| BB212172      | -0.418 | 4.898  | -2.145 | 0.046 | 0.181 | -4.234 |
| Ms4a4b        | 2.547  | 5.043  | 2.145  | 0.046 | 0.181 | -4.235 |
| Rps5          | 0.233  | 12.848 | 2.145  | 0.046 | 0.181 | -4.235 |
| 4932438A13Rik | 0.351  | 6.830  | 2.144  | 0.046 | 0.181 | -4.236 |
| Grsf1         | -0.424 | 8.377  | -2.144 | 0.047 | 0.181 | -4.236 |
| 1700126A01Rik | -0.291 | 2.543  | -2.144 | 0.047 | 0.181 | -4.236 |
| Lhx2          | -0.334 | 2.619  | -2.143 | 0.047 | 0.181 | -4.237 |
| Igfbp2        | -2.107 | 7.598  | -2.143 | 0.047 | 0.181 | -4.238 |
| C77438        | -0.294 | 2.979  | -2.143 | 0.047 | 0.181 | -4.238 |
| 4921513H07Rik | -0.293 | 2.991  | -2.143 | 0.047 | 0.181 | -4.238 |
| Vmn1r11       | -0.284 | 2.114  | -2.143 | 0.047 | 0.181 | -4.239 |
| Rbm3os        | -0.260 | 2.828  | -2.142 | 0.047 | 0.181 | -4.239 |
| Ndufa4        | -0.753 | 10.256 | -2.142 | 0.047 | 0.181 | -4.239 |
| Evi2a         | 0.559  | 4.866  | 2.142  | 0.047 | 0.181 | -4.240 |
| Ptger4        | 1.332  | 4.260  | 2.141  | 0.047 | 0.181 | -4.241 |
| 4930553P13Rik | -0.310 | 3.716  | -2.141 | 0.047 | 0.181 | -4.241 |
| Usp27x        | -0.278 | 3.800  | -2.141 | 0.047 | 0.181 | -4.241 |
| 4930403015Rik | -0.372 | 3.922  | -2.141 | 0.047 | 0.181 | -4.241 |
| Fgfrlop2      | 0.242  | 9.555  | 2.141  | 0.047 | 0.181 | -4.241 |
| Tapbp1        | 0.803  | 4.237  | 2.141  | 0.047 | 0.181 | -4.241 |
| Erbb3         | 0.241  | 9.977  | 2.141  | 0.047 | 0.182 | -4.242 |
| Casq1         | -0.352 | 4.767  | -2.141 | 0.047 | 0.182 | -4.242 |
| Lpin1         | -0.655 | 5.537  | -2.140 | 0.047 | 0.182 | -4.243 |
| Ufd11         | 0.233  | 7.787  | 2.140  | 0.047 | 0.182 | -4.243 |
| Klh133        | -0.272 | 2.770  | -2.140 | 0.047 | 0.182 | -4.243 |
| Spatc1        | -0.256 | 2.928  | -2.140 | 0.047 | 0.182 | -4.244 |
| Dnajc5        | 0.681  | 7.379  | 2.139  | 0.047 | 0.182 | -4.245 |
| Chrna9        | -0.252 | 2.804  | -2.139 | 0.047 | 0.182 | -4.245 |
| Msx2          | -0.368 | 2.633  | -2.139 | 0.047 | 0.182 | -4.245 |
| Mme           | -0.342 | 3.921  | -2.138 | 0.047 | 0.182 | -4.247 |
| Nup155        | 0.506  | 6.247  | 2.137  | 0.047 | 0.182 | -4.248 |
| Trove2        | -0.616 | 6.383  | -2.137 | 0.047 | 0.182 | -4.248 |
| 2900001G08Rik | -1.618 | 4.995  | -2.137 | 0.047 | 0.183 | -4.249 |
| Ube2g1        | -0.318 | 9.329  | -2.136 | 0.047 | 0.183 | -4.249 |
| Ankrd10       | 0.402  | 7.439  | 2.136  | 0.047 | 0.183 | -4.249 |
| Rab37         | -0.386 | 3.863  | -2.136 | 0.047 | 0.183 | -4.249 |
| Klf14         | -0.243 | 4.788  | -2.136 | 0.047 | 0.183 | -4.249 |
| Tra2a         | 0.783  | 6.122  | 2.136  | 0.047 | 0.183 | -4.250 |
| 9430078K24Rik | -0.355 | 4.579  | -2.136 | 0.047 | 0.183 | -4.250 |
| D8Ert620e     | -0.587 | 3.223  | -2.136 | 0.047 | 0.183 | -4.250 |

|               |        |        |        |       |       |        |
|---------------|--------|--------|--------|-------|-------|--------|
| AU022084      | -0.232 | 2.392  | -2.136 | 0.047 | 0.183 | -4.250 |
| Epgn          | -0.423 | 4.171  | -2.136 | 0.047 | 0.183 | -4.250 |
| Rnf166        | -0.559 | 7.741  | -2.136 | 0.047 | 0.183 | -4.250 |
| Gle1          | 0.332  | 6.588  | 2.136  | 0.047 | 0.183 | -4.250 |
| Coq4          | 0.455  | 6.948  | 2.136  | 0.047 | 0.183 | -4.251 |
| A930018M24Rik | -0.263 | 2.942  | -2.135 | 0.047 | 0.183 | -4.251 |
| Syn3          | -0.397 | 5.112  | -2.135 | 0.047 | 0.183 | -4.251 |
| 2810414N06Rik | -0.313 | 2.363  | -2.135 | 0.047 | 0.183 | -4.251 |
| Cdc20b        | -0.303 | 3.177  | -2.135 | 0.047 | 0.183 | -4.251 |
| Nap113        | -0.468 | 3.253  | -2.135 | 0.047 | 0.183 | -4.252 |
| D330013E07Rik | -0.320 | 2.719  | -2.135 | 0.047 | 0.183 | -4.252 |
| Ifltd1        | -0.369 | 4.789  | -2.135 | 0.047 | 0.183 | -4.252 |
| Arhgef25      | 0.577  | 4.998  | 2.135  | 0.047 | 0.183 | -4.252 |
| Sat1          | 0.556  | 9.521  | 2.134  | 0.047 | 0.183 | -4.253 |
| Pgpep11       | -0.265 | 2.739  | -2.134 | 0.047 | 0.183 | -4.253 |
| Mal2          | 0.283  | 10.479 | 2.134  | 0.047 | 0.183 | -4.254 |
| B830008H07Rik | -0.361 | 4.994  | -2.133 | 0.047 | 0.183 | -4.254 |
| 9130017K11Rik | 0.411  | 3.855  | 2.133  | 0.048 | 0.183 | -4.255 |
| Asic3         | -0.298 | 2.583  | -2.133 | 0.048 | 0.183 | -4.255 |
| Rtn2          | -0.362 | 3.579  | -2.133 | 0.048 | 0.183 | -4.255 |
| Klk4          | -0.400 | 3.231  | -2.133 | 0.048 | 0.183 | -4.256 |
| Akirin2       | 0.247  | 9.513  | 2.132  | 0.048 | 0.183 | -4.257 |
| Idi1          | 0.529  | 8.344  | 2.132  | 0.048 | 0.183 | -4.257 |
| Prss36        | -0.302 | 5.579  | -2.132 | 0.048 | 0.183 | -4.257 |
| AI317158      | -0.320 | 3.002  | -2.131 | 0.048 | 0.183 | -4.258 |
| 4833446E11Rik | -0.434 | 3.735  | -2.131 | 0.048 | 0.184 | -4.259 |
| D3Ertd797e    | -0.273 | 2.243  | -2.130 | 0.048 | 0.184 | -4.260 |
| Myo10         | -0.260 | 6.972  | -2.130 | 0.048 | 0.184 | -4.260 |
| Fam222b       | -0.479 | 7.443  | -2.130 | 0.048 | 0.184 | -4.260 |
| Gstt1         | -0.707 | 9.350  | -2.130 | 0.048 | 0.184 | -4.260 |
| Caps1         | 0.650  | 4.135  | 2.130  | 0.048 | 0.184 | -4.260 |
| Brcc3         | -0.329 | 2.751  | -2.129 | 0.048 | 0.184 | -4.261 |
| Fam134c       | 0.966  | 7.191  | 2.129  | 0.048 | 0.184 | -4.261 |
| Mobp          | -0.312 | 2.681  | -2.129 | 0.048 | 0.184 | -4.262 |
| Stk39         | -0.437 | 8.261  | -2.129 | 0.048 | 0.184 | -4.262 |
| Psen2         | -0.320 | 7.891  | -2.129 | 0.048 | 0.184 | -4.262 |
| Fam193a       | -0.568 | 5.672  | -2.129 | 0.048 | 0.184 | -4.263 |
| Pde11a        | -0.260 | 4.029  | -2.128 | 0.048 | 0.184 | -4.263 |
| AU015836      | -0.463 | 4.918  | -2.128 | 0.048 | 0.184 | -4.264 |
| Tcp10a        | -0.396 | 3.113  | -2.128 | 0.048 | 0.184 | -4.264 |
| Ralb          | -0.231 | 8.973  | -2.128 | 0.048 | 0.184 | -4.264 |
| Colgalt2      | -0.262 | 4.956  | -2.128 | 0.048 | 0.184 | -4.264 |
| Sesn1         | -0.374 | 6.051  | -2.127 | 0.048 | 0.184 | -4.264 |
| Idh3g         | -0.589 | 10.019 | -2.127 | 0.048 | 0.184 | -4.265 |
| Nell2         | -0.344 | 4.764  | -2.127 | 0.048 | 0.184 | -4.266 |
| Mtrr          | 0.438  | 5.836  | 2.127  | 0.048 | 0.184 | -4.266 |
| 5530401A14Rik | -0.294 | 3.595  | -2.127 | 0.048 | 0.184 | -4.266 |
| Gm13752       | -0.319 | 2.429  | -2.126 | 0.048 | 0.184 | -4.266 |
| Kctd21        | -0.341 | 6.217  | -2.126 | 0.048 | 0.184 | -4.266 |
| Prdm5         | -0.452 | 5.017  | -2.126 | 0.048 | 0.184 | -4.266 |

|               |        |        |        |       |       |        |
|---------------|--------|--------|--------|-------|-------|--------|
| Echdc3        | -0.571 | 6.503  | -2.126 | 0.048 | 0.185 | -4.268 |
| Ces2c         | -0.439 | 11.538 | -2.126 | 0.048 | 0.185 | -4.268 |
| Tssk4         | -0.313 | 4.075  | -2.125 | 0.048 | 0.185 | -4.268 |
| Cox6a1        | -0.224 | 13.629 | -2.125 | 0.048 | 0.185 | -4.269 |
| Ces5a         | -0.286 | 2.998  | -2.125 | 0.048 | 0.185 | -4.269 |
| Rsl24d1       | 0.492  | 7.794  | 2.125  | 0.048 | 0.185 | -4.269 |
| Zdhhc11       | -0.301 | 3.170  | -2.125 | 0.048 | 0.185 | -4.269 |
| S100a8        | 1.756  | 4.993  | 2.125  | 0.048 | 0.185 | -4.269 |
| Tmem107       | -0.351 | 7.998  | -2.124 | 0.048 | 0.185 | -4.270 |
| Mett13        | 0.261  | 7.189  | 2.124  | 0.048 | 0.185 | -4.271 |
| Rnf214        | -0.300 | 6.380  | -2.124 | 0.048 | 0.185 | -4.271 |
| Btbd17        | 0.347  | 3.532  | 2.123  | 0.048 | 0.185 | -4.271 |
| Ptger1        | -0.260 | 2.396  | -2.123 | 0.048 | 0.185 | -4.272 |
| Dqx1          | -0.367 | 3.971  | -2.123 | 0.048 | 0.185 | -4.272 |
| Epx           | -0.366 | 3.350  | -2.123 | 0.048 | 0.185 | -4.272 |
| 1700086D15Rik | -0.402 | 4.802  | -2.123 | 0.048 | 0.185 | -4.273 |
| Fkbp14        | -0.502 | 4.554  | -2.123 | 0.049 | 0.185 | -4.273 |
| Vmn1r41       | -0.256 | 2.538  | -2.123 | 0.049 | 0.185 | -4.273 |
| Naa11         | -0.392 | 2.698  | -2.122 | 0.049 | 0.185 | -4.273 |
| Arsb          | -0.283 | 8.607  | -2.122 | 0.049 | 0.185 | -4.274 |
| Hadha         | -0.285 | 10.365 | -2.122 | 0.049 | 0.185 | -4.274 |
| Ptpra         | -0.308 | 7.697  | -2.122 | 0.049 | 0.185 | -4.274 |
| Shcbp1        | 0.588  | 7.443  | 2.122  | 0.049 | 0.185 | -4.274 |
| Cyp2b19       | -0.276 | 2.954  | -2.122 | 0.049 | 0.185 | -4.275 |
| Prkaa2        | -0.782 | 7.318  | -2.121 | 0.049 | 0.185 | -4.275 |
| Plagl1        | -0.365 | 3.004  | -2.121 | 0.049 | 0.185 | -4.275 |
| Kifc5b        | 0.349  | 3.013  | 2.121  | 0.049 | 0.185 | -4.276 |
| LOC102641264  | -0.260 | 2.866  | -2.121 | 0.049 | 0.186 | -4.276 |
| 6430547I21Rik | -0.291 | 2.647  | -2.121 | 0.049 | 0.186 | -4.276 |
| Rad51apl      | 0.730  | 5.844  | 2.121  | 0.049 | 0.186 | -4.276 |
| Hnrnpk        | 0.355  | 10.070 | 2.121  | 0.049 | 0.186 | -4.276 |
| Akr1e1        | -0.394 | 7.493  | -2.120 | 0.049 | 0.186 | -4.277 |
| Mgmt          | -0.558 | 6.338  | -2.120 | 0.049 | 0.186 | -4.277 |
| 3110080E11Rik | -0.241 | 2.249  | -2.120 | 0.049 | 0.186 | -4.277 |
| Capn13        | 0.479  | 9.199  | 2.120  | 0.049 | 0.186 | -4.277 |
| Gsk3b         | -0.434 | 4.559  | -2.120 | 0.049 | 0.186 | -4.277 |
| Gjb1          | 0.518  | 9.099  | 2.120  | 0.049 | 0.186 | -4.278 |
| 2310007L24Rik | -0.437 | 4.296  | -2.120 | 0.049 | 0.186 | -4.278 |
| Atp7a         | 0.340  | 8.202  | 2.119  | 0.049 | 0.186 | -4.279 |
| Med25         | -0.322 | 8.304  | -2.119 | 0.049 | 0.186 | -4.279 |
| 4933404I11Rik | -0.351 | 2.878  | -2.119 | 0.049 | 0.186 | -4.279 |
| 2510003E04Rik | -0.374 | 4.613  | -2.119 | 0.049 | 0.186 | -4.279 |
| 4933425D22Rik | -0.317 | 2.911  | -2.119 | 0.049 | 0.186 | -4.279 |
| Obox1         | -0.364 | 2.677  | -2.119 | 0.049 | 0.186 | -4.279 |
| Atp6v1a       | -0.347 | 9.145  | -2.118 | 0.049 | 0.186 | -4.280 |
| LOC665506     | 1.040  | 6.001  | 2.118  | 0.049 | 0.186 | -4.280 |
| Gm11985       | -0.351 | 2.515  | -2.118 | 0.049 | 0.186 | -4.281 |
| B230204H03Rik | -0.309 | 3.178  | -2.117 | 0.049 | 0.186 | -4.282 |
| Gm14169       | -0.273 | 3.402  | -2.117 | 0.049 | 0.186 | -4.282 |
| Nog           | -0.288 | 3.277  | -2.117 | 0.049 | 0.186 | -4.282 |

|               |        |        |        |       |       |        |
|---------------|--------|--------|--------|-------|-------|--------|
| B230219D22Rik | -0.451 | 8.666  | -2.117 | 0.049 | 0.186 | -4.282 |
| Ar12          | -0.411 | 7.437  | -2.117 | 0.049 | 0.186 | -4.283 |
| Btnl10        | -0.313 | 3.283  | -2.116 | 0.049 | 0.186 | -4.283 |
| Atpla1        | 0.460  | 10.879 | 2.116  | 0.049 | 0.186 | -4.283 |
| Hnrnpd1       | 0.618  | 8.483  | 2.116  | 0.049 | 0.186 | -4.284 |
| Ldhd          | -0.605 | 7.026  | -2.116 | 0.049 | 0.186 | -4.284 |
| Slc29a3       | -0.412 | 4.258  | -2.116 | 0.049 | 0.186 | -4.284 |
| Ypel3         | -0.439 | 8.419  | -2.116 | 0.049 | 0.186 | -4.284 |
| Igsf5         | -0.541 | 9.333  | -2.116 | 0.049 | 0.186 | -4.285 |
| Gm9873        | -0.482 | 5.300  | -2.115 | 0.049 | 0.186 | -4.285 |
| Dclk2         | -0.347 | 4.602  | -2.115 | 0.049 | 0.186 | -4.285 |
| Hspb7         | -0.259 | 2.816  | -2.115 | 0.049 | 0.186 | -4.286 |
| Cfc1          | -0.247 | 4.591  | -2.115 | 0.049 | 0.187 | -4.286 |
| Chrm4         | -0.317 | 2.883  | -2.115 | 0.049 | 0.187 | -4.286 |
| 9530004P13Rik | -0.334 | 3.801  | -2.115 | 0.049 | 0.187 | -4.286 |
| Mocos         | 0.598  | 6.920  | 2.115  | 0.049 | 0.187 | -4.287 |
| Amhr2         | -0.361 | 4.206  | -2.114 | 0.049 | 0.187 | -4.287 |
| Actc1         | -0.394 | 3.891  | -2.114 | 0.049 | 0.187 | -4.287 |
| Defb15        | -0.322 | 4.252  | -2.114 | 0.049 | 0.187 | -4.288 |
| Trim27        | -0.245 | 2.865  | -2.114 | 0.049 | 0.187 | -4.288 |
| Tmem59        | -0.220 | 2.037  | -2.114 | 0.049 | 0.187 | -4.288 |
| Ssc5d         | -0.364 | 5.990  | -2.114 | 0.049 | 0.187 | -4.288 |
| 2210409E12Rik | -0.784 | 3.779  | -2.113 | 0.049 | 0.187 | -4.288 |
| Adap2         | -0.440 | 3.848  | -2.113 | 0.049 | 0.187 | -4.289 |
| Fzd1          | -0.325 | 3.334  | -2.113 | 0.049 | 0.187 | -4.289 |
| Ccnf          | 0.600  | 6.178  | 2.113  | 0.049 | 0.187 | -4.289 |
| Snx30         | -0.379 | 5.392  | -2.113 | 0.049 | 0.187 | -4.289 |
| Avp           | -0.392 | 4.320  | -2.113 | 0.049 | 0.187 | -4.290 |
| Tspan12       | -0.436 | 4.753  | -2.113 | 0.049 | 0.187 | -4.290 |
| Tfg           | -0.270 | 10.363 | -2.112 | 0.049 | 0.187 | -4.290 |
| Zfp770        | 0.407  | 6.364  | 2.112  | 0.049 | 0.187 | -4.290 |
| Olfm2         | -0.283 | 2.816  | -2.112 | 0.049 | 0.187 | -4.290 |
| Sepp1         | -0.277 | 13.083 | -2.112 | 0.050 | 0.187 | -4.291 |
| Gm2a          | -0.859 | 6.114  | -2.112 | 0.050 | 0.187 | -4.291 |
| Gk5           | -0.517 | 7.728  | -2.112 | 0.050 | 0.187 | -4.292 |
| Rrplb         | 0.426  | 6.225  | 2.112  | 0.050 | 0.187 | -4.292 |
| Zfp507        | 0.281  | 7.942  | 2.111  | 0.050 | 0.187 | -4.292 |
| Jun           | 0.655  | 8.636  | 2.111  | 0.050 | 0.187 | -4.293 |
| Mmaa          | -0.417 | 7.046  | -2.111 | 0.050 | 0.187 | -4.293 |
| Lcn2          | 3.297  | 6.786  | 2.111  | 0.050 | 0.187 | -4.293 |
| Hdhd1a        | -0.397 | 3.029  | -2.111 | 0.050 | 0.187 | -4.293 |
| Rps6ka1       | 0.236  | 9.997  | 2.110  | 0.050 | 0.187 | -4.294 |
| Pdk4          | -0.692 | 6.277  | -2.110 | 0.050 | 0.187 | -4.294 |
| Zkscan3       | 0.584  | 7.048  | 2.110  | 0.050 | 0.187 | -4.294 |
| Itgae         | 1.048  | 4.731  | 2.110  | 0.050 | 0.187 | -4.294 |
| Lrrn1         | -0.775 | 3.811  | -2.110 | 0.050 | 0.187 | -4.295 |
| Pgc           | -1.755 | 12.563 | -2.110 | 0.050 | 0.187 | -4.295 |
| Kmt2d         | -0.417 | 7.077  | -2.110 | 0.050 | 0.187 | -4.295 |
| Tns4          | 1.039  | 5.689  | 2.110  | 0.050 | 0.187 | -4.295 |
| Gm21379       | -0.340 | 2.550  | -2.109 | 0.050 | 0.187 | -4.295 |

|               |        |        |        |       |       |        |
|---------------|--------|--------|--------|-------|-------|--------|
| Sys1          | -0.306 | 4.551  | -2.109 | 0.050 | 0.187 | -4.295 |
| AK164218      | 1.560  | 5.549  | 2.109  | 0.050 | 0.187 | -4.296 |
| Cyp11b2       | -0.442 | 3.319  | -2.109 | 0.050 | 0.187 | -4.296 |
| Cbwd1         | 0.476  | 5.685  | 2.109  | 0.050 | 0.187 | -4.296 |
| Trim65        | 0.377  | 5.953  | 2.109  | 0.050 | 0.187 | -4.296 |
| Hoxb5os       | -0.326 | 5.384  | -2.109 | 0.050 | 0.187 | -4.297 |
| Phosphol      | -0.278 | 3.794  | -2.108 | 0.050 | 0.187 | -4.297 |
| Gm10839       | -0.254 | 2.529  | -2.108 | 0.050 | 0.187 | -4.297 |
| E530001K10Rik | -0.292 | 4.105  | -2.108 | 0.050 | 0.188 | -4.298 |
| 4931408D14Rik | -0.340 | 4.453  | -2.108 | 0.050 | 0.188 | -4.298 |
| Gm1821        | -0.229 | 13.516 | -2.108 | 0.050 | 0.188 | -4.298 |
| Nsun2         | 0.404  | 9.123  | 2.108  | 0.050 | 0.188 | -4.298 |
| Ostc          | 1.027  | 5.088  | 2.107  | 0.050 | 0.188 | -4.299 |
| Rab13         | 0.223  | 6.320  | 2.107  | 0.050 | 0.188 | -4.299 |

**Table S6. 56 Differentially expressed genes**

| number | symbol  | Local dataset1 |         | Mouse_40634 |         | Local dataset 2 |         | Mouse_1 3873 |       | TCGA_Overall Survival |       |
|--------|---------|----------------|---------|-------------|---------|-----------------|---------|--------------|-------|-----------------------|-------|
|        |         | logFC          | P.Value | logFC       | P.Value | P.Value         | P.Value | HR           | low95 | up95                  | p.val |
| 1      | OSMR    | 1.287          | 0.000   | 4.911       | 0.000   | 0.026           | 0.000   | 1.100        | 0.970 | 1.300                 | 0.013 |
| 2      | NID2    | 1.392          | 0.000   | 1.411       | 0.001   | 0.001           | 0.007   | 1.200        | 1.000 | 1.400                 | 0.003 |
| 3      | ADHFE1  | -1.405         | 0.000   | -1.606      | 0.000   | 0.049           | 0.000   | 1.100        | 0.900 | 1.300                 | 0.037 |
| 4      | PXDN    | 1.340          | 0.000   | 4.774       | 0.000   | 0.032           | 0.012   | 1.200        | 1.000 | 1.400                 | 0.005 |
| 5      | TNFAIP3 | 1.085          | 0.000   | 1.302       | 0.000   | 0.000           | 0.000   | 1.000        | 0.850 | 1.200                 | 0.155 |
| 6      | VCAN    | 1.680          | 0.000   | 3.971       | 0.000   | 0.034           | 0.005   | 1.200        | 1.100 | 1.400                 | 0.000 |
| 7      | PSCA    | -4.157         | 0.000   | -5.203      | 0.000   | 0.013           | 0.005   | 1.000        | 0.980 | 1.100                 | 0.008 |
| 8      | ALDH6A1 | -1.720         | 0.000   | -2.350      | 0.000   | 0.017           | 0.011   | 1.100        | 0.860 | 1.400                 | 0.321 |
| 9      | MSN     | 1.069          | 0.000   | 5.484       | 0.000   | 0.000           | 0.017   | 1.100        | 0.940 | 1.400                 | 0.026 |
| 10     | ARHGDI3 | -1.364         | 0.000   | -3.558      | 0.000   | 0.032           | 0.012   | 1.100        | 0.930 | 1.200                 | 0.033 |
| 11     | BICC1   | 1.090          | 0.000   | 5.164       | 0.000   | 0.021           | 0.022   | 1.200        | 1.000 | 1.400                 | 0.004 |
| 12     | HPGD    | -2.010         | 0.000   | -4.497      | 0.000   | 0.021           | 0.008   | 1.100        | 0.960 | 1.200                 | 0.095 |
| 13     | APOE    | 1.529          | 0.000   | 5.299       | 0.000   | 0.003           | 0.015   | 1.100        | 0.980 | 1.200                 | 0.004 |
| 14     | BHLHE40 | 1.138          | 0.000   | 1.867       | 0.000   | 0.011           | 0.031   | 1.100        | 0.880 | 1.300                 | 0.193 |
| 15     | KCNJ13  | -1.153         | 0.000   | -2.006      | 0.000   | 0.002           | 0.001   | 0.960        | 0.750 | 1.200                 | 0.147 |
| 16     | C1QB    | 1.025          | 0.000   | 5.518       | 0.000   | 0.002           | 0.036   | 1.100        | 0.940 | 1.200                 | 0.121 |
| 17     | STOM    | 1.212          | 0.000   | 2.735       | 0.000   | 0.012           | 0.008   | 1.200        | 1.000 | 1.400                 | 0.027 |
| 18     | SCTR    | -1.061         | 0.000   | -1.350      | 0.000   | 0.020           | 0.031   | 1.100        | 0.970 | 1.200                 | 0.002 |
| 19     | COL6A3  | 2.080          | 0.000   | 5.414       | 0.000   | 0.000           | 0.028   | 1.100        | 0.990 | 1.300                 | 0.021 |
| 20     | NQO1    | -1.404         | 0.000   | -4.225      | 0.000   | 0.038           | 0.015   | 0.990        | 0.880 | 1.100                 | 0.163 |
| 21     | SCNN1G  | -1.574         | 0.000   | -1.123      | 0.001   | 0.012           | 0.001   | 1.100        | 0.960 | 1.200                 | 0.037 |
| 22     | FAM174B | -1.254         | 0.000   | -3.905      | 0.000   | 0.020           | 0.000   | 1.000        | 0.900 | 1.200                 | 0.124 |
| 23     | CAPN13  | -2.067         | 0.000   | -2.188      | 0.001   | 0.013           | 0.049   | 1.000        | 0.940 | 1.200                 | 0.084 |
| 24     | CCKAR   | -1.713         | 0.000   | -2.149      | 0.000   | 0.005           | 0.006   | 1.000        | 0.900 | 1.200                 | 0.267 |
| 25     | GPT2    | -1.832         | 0.000   | -2.384      | 0.000   | 0.001           | 0.009   | 1.000        | 0.890 | 1.200                 | 0.015 |
| 26     | TMED6   | -2.049         | 0.000   | -4.082      | 0.000   | 0.024           | 0.000   | 1.100        | 0.860 | 1.300                 | 0.144 |
| 27     | PGC     | -5.649         | 0.000   | -8.693      | 0.000   | 0.001           | 0.050   | 1.000        | 0.970 | 1.000                 | 0.216 |
| 28     | SYTL1   | -1.263         | 0.000   | -3.051      | 0.000   | 0.003           | 0.001   | 1.000        | 0.860 | 1.200                 | 0.371 |
| 29     | ADH7    | -1.541         | 0.000   | -3.876      | 0.000   | 0.041           | 0.036   | 1.000        | 0.920 | 1.100                 | 0.114 |
| 30     | KCNJ15  | -1.576         | 0.000   | -4.205      | 0.000   | 0.010           | 0.003   | 1.100        | 0.990 | 1.200                 | 0.015 |
| 31     | PIK3C2G | -2.422         | 0.000   | -2.368      | 0.002   | 0.003           | 0.006   | 1.000        | 0.960 | 1.100                 | 0.126 |
| 32     | BMP1    | 1.076          | 0.000   | 4.306       | 0.000   | 0.002           | 0.001   | 1.200        | 0.970 | 1.500                 | 0.027 |
| 33     | SULT1C2 | -2.591         | 0.000   | -5.863      | 0.000   | 0.008           | 0.021   | 1.000        | 0.940 | 1.100                 | 0.097 |
| 34     | PLA2G7  | 1.346          | 0.000   | 4.789       | 0.000   | 0.000           | 0.019   | 1.100        | 0.930 | 1.200                 | 0.156 |
| 35     | GLIPR1  | 1.082          | 0.000   | 4.244       | 0.000   | 0.000           | 0.000   | 1.100        | 0.980 | 1.300                 | 0.014 |
| 36     | ELOVL5  | 1.176          | 0.000   | 4.634       | 0.000   | 0.009           | 0.002   | 1.000        | 0.890 | 1.200                 | 0.210 |
| 37     | PLLP    | -1.632         | 0.000   | -2.856      | 0.000   | 0.013           | 0.002   | 0.970        | 0.840 | 1.100                 | 0.021 |
| 38     | CCKBR   | -1.976         | 0.000   | -2.157      | 0.000   | 0.034           | 0.000   | 1.000        | 0.910 | 1.200                 | 0.227 |
| 39     | STARD10 | -1.333         | 0.000   | -1.756      | 0.000   | 0.001           | 0.024   | 1.000        | 0.860 | 1.200                 | 0.089 |
| 40     | KLF15   | -1.395         | 0.000   | -1.938      | 0.000   | 0.034           | 0.000   | 1.000        | 0.910 | 1.200                 | 0.335 |
| 41     | EMP1    | 1.218          | 0.000   | 3.651       | 0.000   | 0.008           | 0.028   | 1.100        | 0.930 | 1.200                 | 0.021 |
| 42     | COL18A1 | 1.214          | 0.000   | 3.651       | 0.000   | 0.044           | 0.009   | 1.100        | 0.950 | 1.300                 | 0.059 |
| 43     | RASAL2  | 1.060          | 0.000   | 2.082       | 0.000   | 0.032           | 0.032   | 1.200        | 0.930 | 1.500                 | 0.014 |

|           |        |       |        |       |       |       |       |       |       |       |
|-----------|--------|-------|--------|-------|-------|-------|-------|-------|-------|-------|
| 44 S100A8 | 1.197  | 0.000 | 5.196  | 0.000 | 0.004 | 0.048 | 1.000 | 0.930 | 1.100 | 0.156 |
| 45 SCG3   | -1.058 | 0.000 | -2.200 | 0.000 | 0.026 | 0.014 | 0.960 | 0.840 | 1.100 | 0.291 |
| 46 TTYH3  | 1.551  | 0.000 | 1.718  | 0.000 | 0.011 | 0.003 | 1.100 | 0.900 | 1.200 | 0.090 |
| 47 IFITM3 | 1.066  | 0.000 | 3.094  | 0.000 | 0.001 | 0.011 | 1.000 | 0.880 | 1.200 | 0.130 |
| 48 IFITM3 | 1.066  | 0.000 | 2.147  | 0.000 | 0.006 | 0.014 | 1.000 | 0.880 | 1.200 | 0.130 |
| 49 FBN1   | 1.431  | 0.000 | 3.879  | 0.000 | 0.027 | 0.010 | 1.200 | 1.000 | 1.300 | 0.003 |
| 50 CEBPB  | 1.163  | 0.000 | 1.483  | 0.001 | 0.017 | 0.000 | 1.000 | 0.850 | 1.300 | 0.142 |
| 51 TGM2   | 1.409  | 0.000 | 4.876  | 0.000 | 0.047 | 0.002 | 1.100 | 0.940 | 1.200 | 0.038 |
| 52 KCNQ1  | -2.185 | 0.000 | -2.158 | 0.001 | 0.007 | 0.005 | 0.930 | 0.840 | 1.000 | 0.012 |
| 53 PROM2  | -1.421 | 0.000 | -1.353 | 0.000 | 0.006 | 0.001 | 0.960 | 0.890 | 1.000 | 0.048 |
| 54 MUC5AC | -4.179 | 0.000 | -5.883 | 0.000 | 0.016 | 0.003 | 1.000 | 0.960 | 1.100 | 0.274 |
| 55 CLDN4  | 1.421  | 0.001 | 3.215  | 0.000 | 0.004 | 0.029 | 1.000 | 0.910 | 1.100 | 0.101 |
| 56 CXCL5  | 1.403  | 0.005 | 3.706  | 0.000 | 0.001 | 0.000 | 1.000 | 0.960 | 1.100 | 0.366 |



**Table S7. Two verified stem cell signatures**

| SCGS Benporath Sox2 | SCGS Smith |
|---------------------|------------|
| AASDH               | VSNL1      |
| ABCB7               | AKR1B1     |
| ABCF2               | NOTCH4     |
| ABHD11              | TMEM237    |
| ABLM1               | SAMD5      |
| ABTB2               | PKD2       |
| ACIN1               | NAP1L1     |
| ACO2                | PTTG1      |
| ACOT8               | CDK6       |
| ACOX1               | CDCA7      |
| ACTR1A              | ACSL4      |
| ADAR                | HELLS      |
| ADD3                | IKBIP      |
| AK3                 | PLTP       |
| AKIRIN1             | TMEM201    |
| AKIRIN2             | CACHD1     |
| AKT1S1              | ILF3       |
| ALCAM               | DNMT1      |
| ALDH7A1             | USP31      |
| ALPL                | FAM216A    |
| AMOTL1              | SLC41A1    |
| ANKHD1              | PFKM       |
| ANKRD1              | KANK1      |
| ANO8                | SUPT16H    |
| ANP32A              | ADCY3      |
| ANP32B              | FGD1       |
| AP2A1               | PTPN14     |
| AP3B1               | C20orf27   |
| APEX1               | LGR6       |
| APH1A               | SLC16A7    |
| APP                 | JAM3       |
| AQP2                | FBL        |
| ARF3                | NASP       |
| ARF4                | RANBP1     |
| ARFGEF1             | PRNP       |
| ARHGAP1             | DSE        |
| ARHGAP11A           | GPX7       |
| ARID1B              | KDELC1     |
| ARID4B              | FCHSD2     |
| ARID5B              | SLCO3A1    |
| ARIH1               | CCNB1IP1   |
| ARL4D               | NOL9       |
| ARMC6               | NKRF       |
| ARRDC3              | NUP107     |
| ASNA1               | RCC2       |
| ATAD2               | ARHGAP25   |
| ATF3                | DDX46      |
| ATF4                | TCOF1      |
| ATP5F1              | GMPS       |
| ATP6V1G1            |            |
| AUH                 |            |

|           |  |
|-----------|--|
| AVEN      |  |
| B3GALT4   |  |
| B4GALT6   |  |
| BAMBI     |  |
| BCAT1     |  |
| BCKDHA    |  |
| BCL9      |  |
| BCLAF1    |  |
| BDH2      |  |
| BMP2      |  |
| BMP7      |  |
| BTF3L4    |  |
| BTG1      |  |
| BUB1B     |  |
| BUB3      |  |
| C12orf60  |  |
| C14orf119 |  |
| C14orf159 |  |
| C19orf43  |  |
| C19orf54  |  |
| C1orf174  |  |
| C1orf21   |  |
| C1orf54   |  |
| C20orf194 |  |
| C20orf96  |  |
| CA2       |  |
| CA4       |  |
| CABLES1   |  |
| CACHD1    |  |
| CACNA1A   |  |
| CACNA2D1  |  |
| CALM2     |  |
| CALR      |  |
| CAPRIN1   |  |
| CAPZA2    |  |
| CASP9     |  |
| CBX3      |  |
| CBX5      |  |
| CBY1      |  |
| CCDC93    |  |
| CCDC94    |  |
| CCND1     |  |
| CDC14B    |  |
| CDC42BPA  |  |
| CDC45     |  |
| CDC7      |  |
| CDH2      |  |
| CDH3      |  |
| CDK1      |  |
| CDK12     |  |
| CDK14     |  |
| CDK16     |  |
| CDK17     |  |
| CDK6      |  |

|         |  |
|---------|--|
| CDYL    |  |
| CEP41   |  |
| CEP89   |  |
| CEP95   |  |
| CER1    |  |
| CETN3   |  |
| CFL1    |  |
| CISD1   |  |
| CLIC4   |  |
| CLN3    |  |
| CLP1    |  |
| CNOT8   |  |
| COL12A1 |  |
| COMMD3  |  |
| COMMD7  |  |
| COPB1   |  |
| COPS7A  |  |
| CPT1A   |  |
| CREB3L4 |  |
| CRIM1   |  |
| CSNK1E  |  |
| CTGF    |  |
| CTH     |  |
| CXCL5   |  |
| CYB5R2  |  |
| CYR61   |  |
| DARS2   |  |
| DCAF11  |  |
| DCAKD   |  |
| DDA1    |  |
| DDX17   |  |
| DDX21   |  |
| DDX39A  |  |
| DDX5    |  |
| DHDDS   |  |
| DHRS3   |  |
| DHX38   |  |
| DIAPH3  |  |
| DIDO1   |  |
| DKK1    |  |
| DNAJC16 |  |
| DNAJC2  |  |
| DNM2    |  |
| DPAGT1  |  |
| DPP3    |  |
| DPPA4   |  |
| DPYSL2  |  |
| DPYSL3  |  |
| DSCC1   |  |
| DTNA    |  |
| DUSP12  |  |
| DUSP6   |  |
| DVL2    |  |
| E2F3    |  |

|          |  |
|----------|--|
| EAPP     |  |
| EEF2     |  |
| EGLN3    |  |
| EGR3     |  |
| EIF3F    |  |
| EIF4G2   |  |
| ELAVL2   |  |
| ENPP2    |  |
| ENSA     |  |
| EOMES    |  |
| EPHA1    |  |
| EPM2AIP1 |  |
| ERBB2    |  |
| ERRFI1   |  |
| ETHE1    |  |
| EXOC5    |  |
| EXOSC5   |  |
| EXOSC9   |  |
| EXPH5    |  |
| FAM124A  |  |
| FAM134C  |  |
| FAM168A  |  |
| FAM60A   |  |
| FAM63B   |  |
| FAM76B   |  |
| FAM96A   |  |
| FAM98A   |  |
| FANCC    |  |
| FANCF    |  |
| FARSA    |  |
| FBXL14   |  |
| FBXL19   |  |
| FBXO11   |  |
| FBXO16   |  |
| FBXW11   |  |
| FEM1A    |  |
| FEZ1     |  |
| FGF2     |  |
| FGFR1    |  |
| FGFR2    |  |
| FICD     |  |
| FIP1L1   |  |
| FOXJ2    |  |
| FOXN3    |  |
| FOXO1    |  |
| FOXP1    |  |
| FRAT2    |  |
| FTL      |  |
| FUS      |  |
| FXYD5    |  |
| FZD1     |  |
| FZD10    |  |
| FZD2     |  |
| FZD3     |  |

|            |  |
|------------|--|
| FZD7       |  |
| G3BP1      |  |
| GADD45G    |  |
| GBF1       |  |
| GDAP1      |  |
| GGA1       |  |
| GGPS1      |  |
| GJA1       |  |
| GNA13      |  |
| GNAI1      |  |
| GNG10      |  |
| GNPTAB     |  |
| GPC6       |  |
| GRHL2      |  |
| GRID2      |  |
| GRK6       |  |
| GSK3A      |  |
| GSK3B      |  |
| GSPT2      |  |
| GTPBP3     |  |
| GXYLT1     |  |
| H2AFJ      |  |
| H2AFX      |  |
| H3F3B      |  |
| HAS2       |  |
| HBP1       |  |
| HDAC2      |  |
| HDAC9      |  |
| HECTD2     |  |
| HELLS      |  |
| HEPH       |  |
| HESX1      |  |
| HEXIM2     |  |
| HHEX       |  |
| HIF1AN     |  |
| HIST1H4C   |  |
| HIST2H2AA3 |  |
| HIST2H2BE  |  |
| HIST3H2A   |  |
| HLTF       |  |
| HMBOX1     |  |
| HMG20A     |  |
| HMOX1      |  |
| HN1        |  |
| HNRNPA1    |  |
| HNRNPA2B1  |  |
| HNRNPC     |  |
| HNRNPK     |  |
| HNRNPL     |  |
| HNRNPUL1   |  |
| HSD17B12   |  |
| HSP90AB1   |  |
| HSP90B1    |  |
| HSPA13     |  |

|           |  |
|-----------|--|
| HUWE1     |  |
| ICMT      |  |
| ID1       |  |
| IDH3G     |  |
| IER5L     |  |
| IFI16     |  |
| IGF2BP3   |  |
| IGFBP2    |  |
| IK        |  |
| ILF2      |  |
| ILF3      |  |
| ING4      |  |
| INHBA     |  |
| INO80C    |  |
| INO80D    |  |
| IRX2      |  |
| IWS1      |  |
| JARID2    |  |
| JUP       |  |
| KANK1     |  |
| KAT6A     |  |
| KCNMB4    |  |
| KCNN2     |  |
| KDM3A     |  |
| KDR       |  |
| KIAA0319L |  |
| KIAA0368  |  |
| KIAA0391  |  |
| KIAA1143  |  |
| KIF11     |  |
| KIF15     |  |
| KIF20B    |  |
| KIF26A    |  |
| KIF2C     |  |
| KLF5      |  |
| KLHL5     |  |
| KNTC1     |  |
| KPNA3     |  |
| LAMA4     |  |
| LAMTOR2   |  |
| LARP7     |  |
| LASP1     |  |
| LEFTY1    |  |
| LEFTY2    |  |
| LHPP      |  |
| LINCO0337 |  |
| LINGO1    |  |
| LOXL2     |  |
| LRAT      |  |
| LRFN3     |  |
| LRP2      |  |
| LRRN1     |  |
| LSG1      |  |
| LSM3      |  |

|         |  |
|---------|--|
| LSM4    |  |
| LYPD1   |  |
| MAGED2  |  |
| MAN2C1  |  |
| MAP3K11 |  |
| MAP3K12 |  |
| MAPRE2  |  |
| MAST1   |  |
| MAT2B   |  |
| MCTS1   |  |
| MDC1    |  |
| MED12   |  |
| MED17   |  |
| MED25   |  |
| MEX3C   |  |
| MGEA5   |  |
| MKKS    |  |
| MLH1    |  |
| MLLT10  |  |
| MOBP    |  |
| MORF4L1 |  |
| MORF4L2 |  |
| MOSPD3  |  |
| MPND    |  |
| MRPL15  |  |
| MRPL43  |  |
| MRPL47  |  |
| MRPS11  |  |
| MRPS18B |  |
| MRPS23  |  |
| MRPS27  |  |
| MRPS31  |  |
| MSC     |  |
| MSL3    |  |
| MTF2    |  |
| MTM1    |  |
| MTSS1   |  |
| MUS81   |  |
| MYNN    |  |

**Table S8. Characteristics of 365 patients with gastric cancer in three tumor tissue microarrays cohort**

| Num<br>ber | Gender | Age | Tumor_lo-<br>cation | Tumor_si-<br>ze | AJ               | Adjuvant<br>_chemo | OS   |            | RF        |             |                  | CTNN<br>B1<br>score |
|------------|--------|-----|---------------------|-----------------|------------------|--------------------|------|------------|-----------|-------------|------------------|---------------------|
|            |        |     |                     |                 | CC<br>_st<br>age |                    | stat | OS<br>time | S<br>stat | RFS<br>time | RASAL2<br>_tumor |                     |
| 1          | Male   | 66  | Antrum              | > 5.0cm         | II               | No ACT             | 0    | 117        | 0         | 110         | Positive         | 9                   |
| 2          | Male   | 83  | Cardia              | > 5.0cm         | III              | No ACT             | 1    | 21         | 1         | 14          | Positive         | 9                   |
| 3          | Male   | 80  | Body                | > 5.0cm         | II               | No ACT             | 1    | 24         | 1         | 24          | Negative         | 4                   |
| 4          | Male   | 64  | Cardia              | ≤ 5.0cm         | I                | No ACT             | 0    | 120        | 0         | 110         | Positive         | 6                   |
| 5          | Male   | 59  | Antrum              | ≤ 5.0cm         | I                | No ACT             | 0    | 117        | 0         | 111         | Positive         | 9                   |
| 6          | Female | 51  | Antrum              | ≤ 5.0cm         | I                | No ACT             | 1    | 49         | 1         | 49          | Positive         | 9                   |
| 7          | Male   | 65  | Cardia              | > 5.0cm         | III              | No ACT             | 1    | 33         | 1         | 14          | Positive         | 6                   |
| 8          | Male   | 75  | Antrum              | ≤ 5.0cm         | III              | No ACT             | 0    | 117        | 0         | 109         | Positive         | 3                   |
| 9          | Male   | 63  | Body                | > 5.0cm         | III              | No ACT             | 1    | 27         | 1         | 27          | Negative         | 2                   |
| 10         | Male   | 77  | Cardia              | ≤ 5.0cm         | III              | No ACT             | 1    | 44         | 1         | 44          | Positive         | 6                   |
| 11         | Male   | 56  | Body                | > 5.0cm         | III              | No ACT             | 1    | 8          | 1         | 8           | Positive         | 9                   |
| 12         | Male   | 74  | Body                | > 5.0cm         | III              | No ACT             | 1    | 22         | 1         | 20          | Positive         | 4                   |
| 13         | Male   | 82  | Antrum              | > 5.0cm         | III              | No ACT             | 1    | 7          | 1         | 4           | Positive         | 9                   |
| 14         | Male   | 45  | Antrum              | > 5.0cm         | III              | Unknown            | 0    | 117        | 0         | 109         | Negative         | 2                   |
| 15         | Male   | 50  | Antrum              | ≤ 5.0cm         | II               | No ACT             | 0    | 121        | 0         | 108         | Positive         | 6                   |
| 16         | Male   | 64  | Cardia              | > 5.0cm         | III              | No ACT             | 1    | 19         | 1         | 8           | Positive         | 6                   |
| 17         | Male   | 72  | Antrum              | > 5.0cm         | III              | Unknown            | 0    | 115        | 0         | 108         | Positive         | 1                   |
| 18         | Male   | 48  | Body                | > 5.0cm         | III              | Unknown            | 1    | 13         | 1         | 8           | Positive         | 6                   |
| 19         | Female | 63  | Body                | > 5.0cm         | III              | Unknown            | 1    | 3          | 1         | 3           | Positive         | 3                   |
| 20         | Male   | 58  | Cardia              | > 5.0cm         | III              | Unknown            | 1    | 48         | 1         | 48          | Positive         | 9                   |
| 21         | Male   | 62  | Antrum              | ≤ 5.0cm         | III              | Unknown            | 1    | 56         | 1         | 53          | Negative         | 2                   |
| 22         | Male   | 64  | Antrum              | > 5.0cm         | II               | Unknown            | 1    | 118        | 1         | 104         | Positive         | 6                   |
| 23         | Male   | 67  | Antrum              | ≤ 5.0cm         | III              | Unknown            | 1    | 10         | 1         | 8           | Positive         | 6                   |
| 24         | Male   | 64  | Body                | ≤ 5.0cm         | II               | ACT                | 0    | 114        | 0         | 104         | Negative         | 2                   |
| 25         | Male   | 63  | Cardia              | > 5.0cm         | III              | ACT                | 1    | 23         | 1         | 23          | Positive         | 6                   |
| 26         | Female | 56  | Body                | ≤ 5.0cm         | III              | ACT                | 0    | 112        | 0         | 102         | Negative         | 4                   |
| 27         | Male   | 52  | Mixed               | > 5.0cm         | III              | Unknown            | 1    | 25         | 1         | 19          | Positive         |                     |
| 28         | Male   | 65  | Cardia              | > 5.0cm         | III              | No ACT             | 1    | 17         | 1         | 17          | Positive         | 3                   |
| 29         | Female | 62  | Antrum              | > 5.0cm         | I                | No ACT             | 0    | 114        | 0         | 102         | Positive         | 6                   |
| 30         | Male   | 65  | Mixed               | > 5.0cm         | III              | Unknown            | 1    | 7          | 1         | 5           | Positive         | 6                   |
| 31         | Male   | 54  | Antrum              | > 5.0cm         | III              | No ACT             | 0    | 109        | 0         | 100         | Positive         | 9                   |
| 32         | Female | 52  | Antrum              | ≤ 5.0cm         | III              | No ACT             | 0    | 110        | 0         | 100         | Positive         | 2                   |
| 33         | Female | 73  | Antrum              | ≤ 5.0cm         | III              | No ACT             | 0    | 111        | 0         | 100         | Negative         | 3                   |
| 34         | Female | 75  | Antrum              | > 5.0cm         | III              | No ACT             | 1    | 17         | 1         | 23          | Positive         | 2                   |
| 35         | Male   | 66  | Cardia              | ≤ 5.0cm         | I                | No ACT             | 1    | 3          | 1         | 3           | Positive         | 9                   |
| 36         | Male   | 82  | Antrum              | ≤ 5.0cm         | II               | No ACT             | 1    | 60         | 1         | 36          | Positive         | 4                   |
| 37         | Female | 79  | Antrum              | > 5.0cm         | III              | No ACT             | 1    | 12         | 1         | 10          | Positive         | 9                   |
| 38         | Male   | 73  | Body                | ≤ 5.0cm         | I                | No ACT             | 0    | 109        | 0         | 100         | Negative         | 3                   |
| 39         | Male   | 43  | Antrum              | ≤ 5.0cm         | I                | No ACT             | 0    | 111        | 0         | 100         | Positive         | 9                   |
| 40         | Female | 65  | Antrum              | ≤ 5.0cm         | III              | No ACT             | 1    | 6          | 1         | 3           | Positive         | 4                   |
| 41         | Male   | 55  | Mixed               | ≤ 5.0cm         | II               | No ACT             | 0    | 110        | 0         | 100         | Negative         | 4                   |



|    |        |    |        |         |     |         |   |     |   |      |          |   |
|----|--------|----|--------|---------|-----|---------|---|-----|---|------|----------|---|
| 42 | Male   | 83 | Cardia | ≤ 5.0cm | I   | No ACT  | 1 | 27  | 1 | 27   | Positive | 6 |
| 43 | Female | 51 | Mixed  | > 5.0cm | III | No ACT  | 1 | 75  | 1 | 70   | Positive | 9 |
| 44 | Female | 35 | Antrum | ≤ 5.0cm | III | No ACT  | 1 | 25  | 1 | 16   | Positive | 6 |
| 45 | Male   | 62 | Antrum | ≤ 5.0cm | III | No ACT  | 1 | 66  | 1 | 65   | Positive | 3 |
| 46 | Male   | 63 | Body   | > 5.0cm | III | Unknown | 0 | 108 | 0 | 99   | Negative | 2 |
| 47 | Male   | 62 | Mixed  | Unknown | III | ACT     | 0 | 107 | 0 | 99   | Negative | 2 |
| 48 | Male   | 73 | Cardia | Unknown | III | No ACT  | 0 | 106 | 0 | 98   | Positive | 6 |
| 49 | Male   | 57 | Cardia | Unknown | II  | ACT     | 0 | 108 | 0 | 97   | Negative | 4 |
| 50 | Female | 41 | Mixed  | Unknown | III | ACT     | 1 | 9   | 1 | 2    | Positive | 9 |
| 51 | Male   | 38 | Mixed  | Unknown | III | ACT     | 0 | 106 | 0 | 99   | Negative | 2 |
| 52 | Male   | 60 | Antrum | Unknown | III | ACT     | 0 | 108 | 0 | 97   | Negative | 4 |
| 53 | Female | 20 | Antrum | Unknown | II  | ACT     | 1 | 70  | 1 | 44   | Positive | 6 |
| 54 | Female | 34 | Body   | Unknown | II  | ACT     | 0 | 108 | 0 | 97   | Negative | 3 |
| 55 | Female | 46 | Mixed  | Unknown | III | ACT     | 1 | 22  | 1 | 10   | Positive | 6 |
| 56 | Male   | 82 | Antrum | Unknown | I   | No ACT  | 1 | 39  | 1 | 39   | Negative | 3 |
| 57 | Male   | 67 | Cardia | Unknown | III | ACT     | 1 | 32  | 1 | 11   | Positive | 4 |
| 58 | Male   | 76 | Antrum | Unknown | III | No ACT  | 0 | 104 | 0 | 96   | Positive | 1 |
| 59 | Male   | 74 | Cardia | Unknown | II  | No ACT  | 0 | 107 | 0 | 97   | Positive | 0 |
| 60 | Female | 81 | Antrum | Unknown | III | No ACT  | 1 | 37  | 1 | 20   | Positive | 4 |
| 61 | Male   | 73 | Cardia | Unknown | II  | No ACT  | 1 | 27  | 1 | 27   | Positive | 6 |
| 62 | Male   | 53 | Cardia | Unknown | I   | No ACT  | 0 | 106 | 0 | 96   | Positive | 9 |
| 63 | Male   | 55 | Antrum | Unknown | II  | ACT     | 0 | 106 | 0 | 96   | Negative | 4 |
| 64 | Female | 30 | Body   | Unknown | III | ACT     | 1 | 50  | 1 | 48   | Positive | 6 |
| 65 | Male   | 69 | Cardia | Unknown | III | ACT     | 0 | 106 | 0 | 96   | Negative | 6 |
| 66 | Female | 58 | Cardia | Unknown | III | No ACT  | 1 | 15  | 1 | 12   | Positive | 6 |
| 67 | Male   | 77 | Cardia | Unknown | II  | No ACT  | 0 | 107 | 0 | 96   | Negative | 6 |
| 68 | Male   | 45 | Antrum | Unknown | III | ACT     | 1 | 83  | 1 | 59   | Negative | 3 |
| 69 | Male   | 77 | Mixed  | Unknown | III | No ACT  | 1 | 36  | 1 | 36   | Negative | 6 |
| 70 | Male   | 54 | Mixed  | Unknown | III | ACT     | 1 | 34  | 1 | 6    | Positive | 9 |
| 71 | Female | 66 | Antrum | Unknown | II  | ACT     | 0 | 106 | 0 | 97   | Negative | 4 |
| 72 | Male   | 60 | Cardia | Unknown | III | ACT     | 0 | 107 | 0 | 95   | Positive | 3 |
| 73 | Male   | 48 | Cardia | Unknown | III | No ACT  | 0 | 105 | 0 | 96   | Positive | 1 |
| 74 | Male   | 67 | Cardia | Unknown | I   | No ACT  | 1 | 103 | 0 | 97.3 | Positive | 4 |
| 75 | Male   | 61 | Antrum | Unknown | I   | No ACT  | 0 | 104 | 0 | 96   | Positive | 4 |
| 76 | Male   | 60 | Antrum | Unknown | I   | No ACT  | 1 | 67  | 1 | 67   | Positive | 9 |
| 77 | Female | 74 | Body   | Unknown | II  | No ACT  | 1 | 37  | 1 | 22   | Positive | 9 |
| 78 | Male   | 74 | Antrum | Unknown | III | ACT     | 1 | 8   | 1 | 7    | Positive | 6 |
| 79 | Female | 63 | Cardia | Unknown | III | ACT     | 1 | 3   | 1 | 3    | Positive | 6 |
| 80 | Female | 59 | Mixed  | Unknown | II  | ACT     | 1 | 95  | 1 | 93   | Positive | 6 |
| 81 | Female | 58 | Antrum | Unknown | III | ACT     | 1 | 67  | 1 | 47   | Positive | 4 |
| 82 | Male   | 57 | Cardia | Unknown | II  | ACT     | 1 | 105 | 0 | 93   | Positive | 3 |
| 83 | Male   | 60 | Antrum | Unknown | I   | ACT     | 0 | 105 | 0 | 97   | Negative | 1 |
| 84 | Female | 84 | Antrum | Unknown | I   | No ACT  | 0 | 104 | 0 | 94   | Positive | 9 |
| 85 | Male   | 86 | Antrum | Unknown | II  | No ACT  | 0 | 104 | 0 | 94   | Negative | 6 |
| 86 | Male   | 65 | Antrum | Unknown | II  | No ACT  | 1 | 23  | 1 | 20   | Positive | 9 |
| 87 | Female | 53 | Antrum | Unknown | I   | No ACT  | 0 | 104 | 0 | 95   | Negative | 6 |
| 88 | Male   | 62 | Cardia | Unknown | I   | No ACT  | 1 | 14  | 1 | 14   | Negative | 4 |

|     |        |    |        |         |     |         |   |      |   |      |          |   |
|-----|--------|----|--------|---------|-----|---------|---|------|---|------|----------|---|
| 89  | Male   | 70 | Antrum | Unknown | III | No ACT  | 1 | 1    | 1 | 1    | Negative | 6 |
| 90  | Male   | 68 | Body   | Unknown | III | Unknown | 1 | 27   | 1 | 11   | Positive | 6 |
| 91  | Male   | 59 | Antrum | Unknown | III | ACT     | 1 | 30   | 1 | 18   | Positive | 1 |
| 92  | Male   | 65 | Cardia | Unknown | I   | No ACT  | 0 | 104  | 1 | 86   | Negative | 3 |
| 93  | Female | 63 | Antrum | Unknown | I   | ACT     | 0 | 105  | 0 | 94   | Negative | 4 |
| 94  | Female | 60 | Mixed  | Unknown | II  | No ACT  | 1 | 24   | 1 | 21   | Positive | 3 |
| 95  | Male   | 70 | Cardia | Unknown | III | No ACT  | 1 | 6    | 1 | 6    | Positive | 6 |
| 96  | Female | 32 | Antrum | Unknown | III | ACT     | 1 | 36   | 1 | 9    | Positive | 6 |
| 97  | Female | 71 | Antrum | Unknown | III | ACT     | 1 | 21   | 1 | 21   | Negative | 6 |
| 98  | Male   | 73 | Cardia | Unknown | II  | No ACT  | 1 | 40   | 1 | 40   | Negative | 2 |
| 99  | Female | 63 | Antrum | Unknown | II  | ACT     | 0 | 106  | 0 | 93   | Positive | 6 |
| 100 | Female | 49 | Cardia | Unknown | II  | ACT     | 0 | 104  | 0 | 95.3 | Negative | 3 |
| 101 | Male   | 61 | Mixed  | Unknown | II  | ACT     | 1 | 24   | 1 | 11   | Positive | 3 |
| 102 | Male   | 52 | Antrum | Unknown | II  | ACT     | 0 | 103  | 0 | 94   | Positive | 6 |
| 103 | Male   | 58 | Antrum | Unknown | III | ACT     | 0 | 102  | 0 | 94   | Positive | 4 |
| 104 | Male   | 69 | Cardia | Unknown | III | ACT     | 1 | 16   | 1 | 12   | Negative | 2 |
| 105 | Female | 54 | Antrum | Unknown | III | Unknown | 1 | 38   | 1 | 21   | Negative | 4 |
| 106 | Male   | 78 | Cardia | Unknown | II  | ACT     | 0 | 101  | 0 | 93   | Negative | 4 |
| 107 | Male   | 42 | Antrum | Unknown | III | Unknown | 1 | 48   | 1 | 33   | Positive | 6 |
| 108 | Male   | 49 | Antrum | Unknown | II  | ACT     | 0 | 103  | 0 | 94   | Positive | 4 |
| 109 | Male   | 49 | Cardia | Unknown | II  | ACT     | 0 | 102  | 0 | 93   | Positive | 6 |
| 110 | Male   | 76 | Cardia | Unknown | III | ACT     | 1 | 32   | 1 | 17   | Negative | 2 |
| 111 | Male   | 66 | Antrum | Unknown | III | ACT     | 0 | 104  | 0 | 93   | Negative | 0 |
| 112 | Male   | 75 | Cardia | Unknown | II  | ACT     | 0 | 101  | 0 | 92   | Positive | 6 |
| 113 | Male   | 45 | Body   | Unknown | II  | ACT     | 1 | 48   | 1 | 40   | Positive | 6 |
| 114 | Male   | 57 | Mixed  | Unknown | III | ACT     | 1 | 61   | 1 | 45   | Positive | 4 |
| 115 | Male   | 81 | Cardia | Unknown | II  | No ACT  | 1 | 14   | 1 | 14   | Positive | 2 |
| 116 | Female | 37 | Antrum | Unknown | III | ACT     | 0 | 102  | 0 | 92   | Negative | 2 |
| 117 | Male   | 75 | Body   | Unknown | III | ACT     | 1 | 12   | 1 | 8    | Positive | 3 |
| 118 | Male   | 71 | Antrum | Unknown | III | ACT     | 1 | 33   | 1 | 28   | Positive | 6 |
| 119 | Male   | 49 | Body   | Unknown | III | No ACT  | 1 | 19   | 1 | 19   | Positive | 6 |
| 120 | Male   | 65 | Cardia | Unknown | II  | ACT     | 0 | 101  | 0 | 91   | Positive | 4 |
| 121 | Female | 68 | Cardia | Unknown | III | ACT     | 1 | 51   | 1 | 15   | Negative |   |
| 122 | Female | 91 | Cardia | Unknown | II  | No ACT  | 1 | 33   | 1 | 33   | Negative |   |
| 123 | Male   | 69 | Body   | Unknown | II  | Unknown | 1 | 8    | 1 | 8    | Positive |   |
| 124 | Male   | 53 | Antrum | Unknown | II  | ACT     | 0 | 103  | 0 | 92   | Negative |   |
| 125 | Male   | 63 | Cardia | Unknown | III | ACT     | 1 | 30   | 1 | 11   | Positive |   |
| 126 | Male   | 79 | Antrum | Unknown | II  | No ACT  | 1 | 41   | 1 | 41   | Positive |   |
| 127 | Male   | 47 | Cardia | Unknown | III | ACT     | 1 | 35   | 1 | 18   | Positive |   |
| 128 | Male   | 75 | Cardia | Unknown | III | No ACT  | 1 | 12   | 1 | 12   | Negative |   |
| 129 | Male   | 70 | Antrum | Unknown | I   | ACT     | 0 | 100  | 0 | 91   | Negative |   |
| 130 | Female | 37 | Body   | Unknown | II  | ACT     | 0 | 91   | 0 | 91   | Negative |   |
| 131 | Male   | 44 | Body   | Unknown | III | ACT     | 1 | 5    | 1 | 5    | Positive |   |
| 132 | Male   | 62 | Body   | Unknown | III | No ACT  | 1 | 9    | 1 | 9    | Positive |   |
| 133 | Male   | 60 | Antrum | Unknown | III | ACT     | 1 | 23   | 1 | 23   | Positive |   |
| 134 | Male   | 72 | Antrum | Unknown | III | ACT     | 1 | 75.9 | 1 | 76   | Positive |   |
| 135 | Female | 72 | Body   | Unknown | III | Unknown | 1 | 7    | 1 | 4    | Positive |   |

|     |        |    |        |         |     |         |   |     |   |      |          |          |
|-----|--------|----|--------|---------|-----|---------|---|-----|---|------|----------|----------|
| 136 | Male   | 62 | Antrum | ≤ 5.0cm | IV  | No ACT  | 1 | 9   |   |      | Negative | Negative |
| 137 | Male   | 50 | Antrum | Unknown | III | ACT     | 1 | 9   | 1 | 9    | Negative |          |
| 138 | Male   | 66 | Antrum | Unknown | I   | ACT     | 0 | 104 | 0 | 90   | Positive |          |
| 139 | Female | 55 | Body   | Unknown | III | Unknown | 1 | 3   | 1 | 1    | Negative |          |
| 140 | Male   | 83 | Antrum | Unknown | II  | No ACT  | 1 | 60  | 1 | 60   | Positive |          |
| 141 | Male   | 78 | Antrum | Unknown | III | No ACT  | 1 | 60  | 1 | 59   | Positive |          |
| 142 | Male   | 63 | Antrum | Unknown | II  | ACT     | 1 | 11  | 1 | 10   | Positive |          |
| 143 | Male   | 54 | Antrum | Unknown | II  | ACT     | 1 | 74  | 1 | 67   | Positive |          |
| 144 | Male   | 60 | Cardia | Unknown | III | Unknown | 1 | 12  | 1 | 12   | Positive |          |
| 145 | Male   | 73 | Cardia | Unknown | II  | ACT     | 1 | 32  | 1 | 32   | Negative |          |
| 146 | Female | 65 | Cardia | Unknown | I   | ACT     | 0 | 100 | 0 | 90   | Negative |          |
| 147 | Male   | 66 | Antrum | Unknown | III | No ACT  | 1 | 11  | 1 | 9    | Positive |          |
| 148 | Male   | 66 | Mixed  | Unknown | III | ACT     | 1 | 34  | 1 | 32   | Negative |          |
| 149 | Female | 53 | Antrum | Unknown | I   | ACT     | 0 | 103 | 0 | 91   | Negative |          |
| 150 | Male   | 45 | Body   | Unknown | II  | ACT     | 0 | 100 | 0 | 91   | Negative |          |
| 151 | Female | 78 | Antrum | Unknown | III | No ACT  | 1 | 7   | 1 | 4    | Positive |          |
| 152 | Male   | 77 | Cardia | Unknown | II  | No ACT  | 0 | 99  | 0 | 89   | Positive |          |
| 153 | Male   | 48 | Antrum | Unknown | I   | ACT     | 0 | 100 | 0 | 93.6 | Negative |          |
| 154 | Male   | 81 | Antrum | Unknown | II  | No ACT  | 0 | 102 | 0 | 90   | Negative |          |
| 155 | Male   | 62 | Body   | Unknown | III | No ACT  | 1 | 24  | 1 | 17   | Positive |          |
| 156 | Male   | 59 | Antrum | Unknown | III | No ACT  | 1 | 24  | 1 | 21   | Positive |          |
| 157 | Male   | 50 | Antrum | Unknown | II  | No ACT  | 0 | 100 | 0 | 90   | Negative |          |
| 158 | Female | 38 | Mixed  | Unknown | III | No ACT  | 1 | 24  | 1 | 22   | Negative |          |
| 159 | Male   | 54 | Cardia | Unknown | III | ACT     | 0 | 100 | 0 | 88   | Negative |          |
| 160 | Female | 55 | Antrum | Unknown | III | ACT     | 0 | 98  | 0 | 89   | Negative |          |
| 161 | Male   | 73 | Antrum | Unknown | II  | ACT     | 0 | 101 | 0 | 90   | Negative |          |
| 162 | Male   | 71 | Body   | Unknown | II  | No ACT  | 1 | 32  | 1 | 30   | Positive |          |
| 163 | Male   | 81 | Body   | Unknown | III | No ACT  | 1 | 52  | 1 | 48   | Negative |          |
| 164 | Male   | 80 | Body   | Unknown | III | No ACT  | 1 | 11  | 1 | 11   | Negative |          |
| 165 | Male   | 65 | Cardia | Unknown | III | ACT     | 0 | 100 | 0 | 89   | Positive |          |
| 166 | Male   | 68 | Mixed  | Unknown | III | Unknown | 1 | 46  | 1 | 31   | Positive |          |
| 167 | Female | 43 | Mixed  | Unknown | III | ACT     | 0 | 102 | 1 | 90   | Negative |          |
| 168 | Male   | 76 | Body   | Unknown | III | ACT     | 1 | 14  | 1 | 11   | Positive |          |
| 169 | Male   | 62 | Cardia | Unknown | III | ACT     | 0 | 98  | 0 | 77   | Positive |          |
| 170 | Male   | 54 | Antrum | Unknown | III | ACT     | 0 | 99  | 0 | 88   | Positive |          |
| 171 | Male   | 66 | Antrum | Unknown | I   | ACT     | 0 | 99  | 0 | 88   | Positive |          |
| 172 | Female | 68 | Cardia | Unknown | III | ACT     | 0 | 98  | 0 | 89   | Negative |          |
| 173 | Male   | 71 | Body   | Unknown | III | No ACT  | 1 | 8   | 1 | 5    | Negative |          |
| 174 | Female | 69 | Cardia | Unknown | III | No ACT  | 1 | 6   | 1 | 6    | Negative |          |
| 175 | Female | 56 | Antrum | Unknown | III | ACT     | 0 | 101 | 0 | 89   | Positive |          |
| 176 | Male   | 53 | Cardia | Unknown | II  | ACT     | 0 | 99  | 0 | 89   | Positive |          |
| 177 | Female | 55 | Body   | Unknown | III | ACT     | 1 | 23  | 1 | 15   | Positive |          |
| 178 | Male   | 64 | Mixed  | Unknown | III | ACT     | 1 | 46  | 1 | 18   | Positive |          |
| 179 | Male   | 66 | Cardia | Unknown | III | Unknown | 0 | 98  | 0 | 88   | Positive |          |
| 180 | Female | 41 | Body   | Unknown | II  | Unknown | 0 | 100 | 0 | 89   | Negative |          |
| 181 | Female | 52 | Antrum | Unknown | III | ACT     | 1 | 39  | 1 | 31   | Negative |          |
| 182 | Male   | 78 | Cardia | Unknown | II  | No ACT  | 1 | 9   | 1 | 9    | Negative |          |

|     |        |    |        |         |     |         |   |    |   |      |                   |
|-----|--------|----|--------|---------|-----|---------|---|----|---|------|-------------------|
| 183 | Male   | 53 | Cardia | Unknown | I   | ACT     | 0 | 98 | 0 | 87   | Negative          |
| 184 | Male   | 59 | Cardia | Unknown | II  | No ACT  | 1 | 10 | 1 | 7    | Positive          |
| 185 | Male   | 81 | Cardia | Unknown | III | ACT     | 1 | 8  | 1 | 8    | Negative          |
| 186 | Male   | 74 | Body   | Unknown | III | No ACT  | 1 | 8  | 1 | 8    | Positive          |
| 187 | Male   | 62 | Cardia | Unknown | II  | ACT     | 0 | 99 | 0 | 88   | Positive          |
| 188 | Male   | 53 | Antrum | Unknown | III | ACT     | 0 | 98 | 0 | 89   | Negative          |
| 189 | Female | 34 | Body   | Unknown | I   | ACT     | 0 | 96 | 0 | 88   | Negative          |
| 190 | Male   | 79 | Antrum | Unknown | III | No ACT  | 1 | 41 | 1 | 36   | Negative          |
| 191 | Male   | 78 | Cardia | ≤ 5.0cm | III | No ACT  | 1 | 13 |   |      | Positive Negative |
| 192 | Female | 73 | Antrum | Unknown | I   | ACT     | 0 | 97 | 1 | 6    | Positive          |
| 193 | Male   | 58 | Cardia | Unknown | II  | ACT     | 1 | 90 | 0 | 87   | Positive          |
| 194 | Female | 58 | Antrum | Unknown | II  | ACT     | 0 | 97 | 0 | 87   | Positive          |
| 195 | Male   | 41 | Antrum | Unknown | III | No ACT  | 1 | 19 | 1 | 19   | Negative          |
| 196 | Female | 42 | Antrum | Unknown | III | ACT     | 1 | 18 | 1 | 12   | Positive          |
| 197 | Male   | 60 | Antrum | Unknown | III | No ACT  | 1 | 16 | 1 | 10   | Negative          |
| 198 | Male   | 69 | Antrum | Unknown | III | No ACT  | 1 | 26 | 1 | 24   | Positive          |
| 199 | Female | 63 | Cardia | Unknown | II  | ACT     | 0 | 97 | 0 | 88   | Positive          |
| 200 | Male   | 70 | Antrum | Unknown | III | ACT     | 0 | 95 | 0 | 88   | Negative          |
| 201 | Female | 43 | Antrum | Unknown | I   | Unknown | 0 | 96 | 0 | 87.5 | Negative          |
| 202 | Male   | 58 | Antrum | Unknown | III | ACT     | 1 | 17 | 1 | 11   | Positive          |
| 203 | Male   | 55 | Antrum | Unknown | III | ACT     | 1 | 46 | 1 | 16   | Positive          |
| 204 | Male   | 73 | Cardia | Unknown | II  | ACT     | 1 | 10 | 1 | 1    | Positive          |
| 205 | Male   | 59 | Antrum | Unknown | II  | No ACT  | 0 | 96 | 0 | 86   | Negative          |
| 206 | Female | 68 | Antrum | Unknown | II  | ACT     | 0 | 97 | 0 | 86   | Negative          |
| 207 | Male   | 65 | Mixed  | Unknown | III | No ACT  | 1 | 8  | 1 | 8    | Positive          |
| 208 | Male   | 61 | Antrum | Unknown | III | ACT     | 1 | 11 | 1 | 7    | Negative          |
| 209 | Male   | 73 | Antrum | Unknown | I   | ACT     | 0 | 97 | 0 | 86   | Negative          |
| 210 | Male   | 67 | Antrum | Unknown | III | ACT     | 0 | 96 | 0 | 86   | Negative          |
| 211 | Male   | 62 | Body   | Unknown | III | ACT     | 0 | 97 | 0 | 85   | Positive          |
| 212 | Male   | 70 | Body   | Unknown | III | ACT     | 0 | 95 | 0 | 86   | Positive          |
| 213 | Male   | 37 | Antrum | Unknown | III | Unknown | 1 | 31 | 1 | 26   | Positive          |
| 214 | Male   | 64 | Mixed  | Unknown | III | No ACT  | 1 | 17 | 1 | 10   | Positive          |
| 215 | Male   | 60 | Mixed  | Unknown | III | ACT     | 1 | 8  | 1 | 7    | Positive          |
| 216 | Female | 55 | Body   | Unknown | III | ACT     | 1 | 36 | 1 | 20   | Positive          |
| 217 | Male   | 63 | Mixed  | Unknown | III | ACT     | 1 | 42 | 1 | 42   | Negative          |
| 218 | Male   | 60 | Mixed  | Unknown | III | ACT     | 0 | 96 | 0 | 85   | Positive          |
| 219 | Female | 50 | Antrum | Unknown | III | ACT     | 0 | 96 | 0 | 85   | Negative          |
| 220 | Male   | 70 | Cardia | Unknown | III | ACT     | 1 | 10 | 1 | 62   | Negative          |
| 221 | Male   | 46 | Antrum | Unknown | II  | No ACT  | 0 | 93 | 0 | 85   | Positive          |
| 222 | Male   | 65 | Body   | Unknown | III | No ACT  | 1 | 19 | 1 | 19   | Negative          |
| 223 | Male   | 58 | Antrum | Unknown | III | ACT     | 0 | 96 | 0 | 85   | Negative          |
| 224 | Male   | 62 | Body   | Unknown | II  | ACT     | 0 | 95 | 0 | 85   | Positive          |
| 225 | Male   | 71 | Antrum | Unknown | III | ACT     | 0 | 93 | 0 | 85   | Positive          |
| 226 | Female | 58 | Cardia | Unknown | II  | ACT     | 0 | 94 | 0 | 84   | Negative          |
| 227 | Male   | 60 | Cardia | Unknown | II  | ACT     | 0 | 95 | 0 | 86.7 | Negative          |
| 228 | Male   | 61 | Body   | Unknown | III | ACT     | 1 | 29 | 1 | 6    | Positive          |
| 229 | Male   | 72 | Body   | Unknown | III | No ACT  | 1 | 31 | 1 | 27   | Positive          |

|     |        |    |        |         |     |         |   |      |   |    |                   |
|-----|--------|----|--------|---------|-----|---------|---|------|---|----|-------------------|
| 230 | Male   | 64 | Antrum | Unknown | III | ACT     | 1 | 7    | 1 | 4  | Positive          |
| 231 | Male   | 62 | Cardia | Unknown | III | ACT     | 0 | 93   | 0 | 84 | Positive          |
| 232 | Female | 56 | Antrum | Unknown | III | No ACT  | 0 | 93   | 0 | 83 | Positive          |
| 233 | Female | 74 | Antrum | Unknown | II  | Unknown | 0 | 93   | 0 | 84 | Negative          |
| 234 | Male   | 63 | Antrum | Unknown | III | ACT     | 1 | 10   | 1 | 8  | Positive          |
| 235 | Female | 66 | Antrum | Unknown | III | No ACT  | 1 | 20   | 1 | 3  | Positive          |
| 236 | Female | 55 | Mixed  | Unknown | III | No ACT  | 1 | 58   | 1 | 42 | Positive          |
| 237 | Male   | 71 | Mixed  | Unknown | III | No ACT  | 0 | 91   | 0 | 83 | Positive          |
| 238 | Female | 76 | Cardia | Unknown | II  | No ACT  | 0 | 93   | 0 | 82 | Positive          |
| 239 | Male   | 58 | Cardia | Unknown | II  | Unknown | 0 | 95.6 | 1 | 75 | Positive          |
| 240 | Female | 49 | Antrum | Unknown | III | No ACT  | 0 | 94   | 0 | 84 | Negative          |
| 241 | Male   | 60 | Body   | Unknown | II  | ACT     | 0 | 93   | 0 | 82 | Negative          |
| 242 | Male   | 57 | Body   | Unknown | III | ACT     | 1 | 22   | 1 | 22 | Negative          |
| 243 | Male   | 67 | Cardia | Unknown | III | Unknown | 1 | 71   | 1 | 62 | Positive          |
| 244 | Female | 70 | Antrum | ≤ 5.0cm | II  | ACT     | 0 | 82   |   |    | Negative Negative |
| 245 | Male   | 67 | Antrum | ≤ 5.0cm | II  | No ACT  | 0 | 83   |   |    | Negative Positive |
| 246 | Female | 71 | Antrum | ≤ 5.0cm | III | ACT     | 1 | 8    |   |    | Positive Negative |
| 247 | Female | 56 | Antrum | > 5.0cm | III | ACT     | 1 | 79   |   |    | Negative Negative |
| 248 | Male   | 71 | Antrum | > 5.0cm | II  | ACT     | 0 | 83   |   |    | Negative Negative |
| 249 | Female | 73 | Antrum | > 5.0cm | III | No ACT  | 1 | 21   |   |    | Negative Negative |
| 250 | Male   | 68 | Antrum | > 5.0cm | III | ACT     | 0 | 80   |   |    | Negative Negative |
| 251 | Male   | 54 | Mixed  | ≤ 5.0cm | III | No ACT  | 1 | 84   |   |    | Positive Negative |
| 252 | Female | 49 | Body   | ≤ 5.0cm | II  | No ACT  | 0 | 80   |   |    | Negative Negative |
| 253 | Male   | 69 | Antrum | ≤ 5.0cm | II  | No ACT  | 1 | 51   |   |    | Positive Positive |
| 254 | Female | 68 | Antrum | > 5.0cm | III | ACT     | 0 | 82   |   |    | Negative Negative |
| 255 | Female | 61 | Antrum | ≤ 5.0cm | III | ACT     | 1 | 82   |   |    | Positive Positive |
| 256 | Male   | 58 | Antrum | > 5.0cm | III | ACT     | 1 | 81   |   |    | Negative Negative |
| 257 | Male   | 61 | Antrum | > 5.0cm | II  | No ACT  | 1 | 81   |   |    | Positive Negative |
| 258 | Male   | 61 | Antrum | ≤ 5.0cm | II  | No ACT  | 1 | 70   |   |    | Positive Negative |
| 259 | Male   | 84 | Antrum | ≤ 5.0cm | III | ACT     | 0 | 72   |   |    | Positive Positive |
| 260 | Female | 72 | Antrum | ≤ 5.0cm | II  | ACT     | 1 | 59   |   |    | Negative Negative |
| 261 | Male   | 55 | Cardia | > 5.0cm | III | ACT     | 1 | 45   |   |    | Positive Positive |
| 262 | Male   | 70 | Cardia | > 5.0cm | II  | ACT     | 0 | 81   |   |    | Negative Negative |
| 263 | Female | 61 | Antrum | ≤ 5.0cm | II  | ACT     | 0 | 80   |   |    | Positive Positive |
| 264 | Male   | 44 | Antrum | ≤ 5.0cm | III | ACT     | 1 | 42   |   |    | Negative Positive |
| 265 | Male   | 57 | Cardia | ≤ 5.0cm | III | ACT     | 0 | 80   |   |    | Negative Negative |
| 266 | Male   | 35 | Antrum | ≤ 5.0cm | III | ACT     | 0 | 80   |   |    | Negative Positive |
| 267 | Female | 62 | Antrum | ≤ 5.0cm | III | No ACT  | 0 | 81.9 |   |    | Positive Positive |
| 268 | Male   | 60 | Cardia | > 5.0cm | III | ACT     | 1 | 32.9 |   |    | Negative Negative |
| 269 | Female | 75 | Mixed  | > 5.0cm | III | ACT     | 1 | 78   |   |    | Positive Negative |
| 270 | Female | 74 | Antrum | ≤ 5.0cm | III | ACT     | 0 | 81   |   |    | Negative Positive |
| 271 | Male   | 72 | Antrum | ≤ 5.0cm | II  | No ACT  | 0 | 78   |   |    | Positive Negative |
| 272 | Male   | 71 | Antrum | ≤ 5.0cm | III | ACT     | 0 | 79   |   |    | Positive Positive |
| 273 | Male   | 69 | Cardia | ≤ 5.0cm | II  | ACT     | 0 | 76   |   |    | Positive Positive |
| 274 | Male   | 67 | Body   | > 5.0cm | II  | ACT     | 0 | 77   |   |    | Negative Negative |
| 275 | Male   | 83 | Body   | ≤ 5.0cm | III | ACT     | 1 | 26   |   |    | Positive Positive |
| 276 | Male   | 64 | Mixed  | ≤ 5.0cm | I   | Unknown | 1 | 76   |   |    | Positive Negative |

|     |        |    |        |         |     |         |   |      |          |          |
|-----|--------|----|--------|---------|-----|---------|---|------|----------|----------|
| 277 | Male   | 61 | Antrum | > 5.0cm | III | ACT     | 1 | 14   | Positive | Negative |
| 278 | Male   | 67 | Body   | > 5.0cm | III | ACT     | 1 | 12   | Positive | Negative |
| 279 | Male   | 67 | Cardia | > 5.0cm | III | ACT     | 1 | 23   | Negative | Positive |
| 280 | Male   | 68 | Cardia | Unknown | II  | ACT     | 0 | 76   | Negative | Positive |
| 281 | Male   | 60 | Cardia | ≤ 5.0cm | I   | No ACT  | 0 | 76   | Positive | Negative |
| 282 | Male   | 59 | Cardia | ≤ 5.0cm | III | No ACT  | 1 | 23   | Positive | Negative |
| 283 | Male   | 69 | Antrum | ≤ 5.0cm | III | Unknown | 1 | 54   | Positive | Positive |
| 284 | Male   | 65 | Body   | > 5.0cm | II  | ACT     | 0 | 75   | Negative | Negative |
| 285 | Female | 60 | Antrum | ≤ 5.0cm | III | ACT     | 0 | 75   | Negative | Negative |
| 286 | Female | 66 | Mixed  | ≤ 5.0cm | III | No ACT  | 1 | 12   | Positive | Negative |
| 287 | Male   | 56 | Antrum | > 5.0cm | III | ACT     | 0 | 75   | Positive | Negative |
| 288 | Male   | 81 | Cardia | > 5.0cm | IV  | No ACT  | 1 | 6    | Negative | Positive |
| 289 | Male   | 68 | Mixed  | ≤ 5.0cm | I   | No ACT  | 0 | 76   | Positive | Negative |
| 290 | Male   | 66 | Antrum | > 5.0cm | III | No ACT  | 1 | 21   | Negative | Negative |
| 291 | Male   | 57 | Cardia | > 5.0cm | III | Unknown | 1 | 3    | Positive | Negative |
| 292 | Male   | 63 | Cardia | > 5.0cm | II  | No ACT  | 0 | 77   | Negative | Negative |
| 293 | Male   | 59 | Antrum | ≤ 5.0cm | III | No ACT  | 0 | 65   | Positive | Negative |
| 294 | Female | 45 | Cardia | ≤ 5.0cm | IV  | No ACT  | 1 | 46   | Negative | Positive |
| 295 | Male   | 83 | Cardia | ≤ 5.0cm | III | No ACT  | 1 | 41   | Negative | Positive |
| 296 | Male   | 71 | Antrum | ≤ 5.0cm | II  | Unknown | 0 | 74   | Negative | Negative |
| 297 | Female | 67 | Cardia | ≤ 5.0cm | II  | ACT     | 1 | 2    | Positive | Negative |
| 298 | Male   | 68 | Cardia | ≤ 5.0cm | III | No ACT  | 1 | 7    | Negative | Positive |
| 299 | Female | 66 | Body   | ≤ 5.0cm | I   | Unknown | 0 | 73   | Positive | Negative |
| 300 | Male   | 72 | Body   | > 5.0cm | III | ACT     | 0 | 75   | Positive | Positive |
| 301 | Male   | 55 | Body   | > 5.0cm | III | No ACT  | 0 | 75   | Positive | Positive |
| 302 | Male   | 45 | Antrum | > 5.0cm | III | ACT     | 0 | 76.2 | Negative | Negative |
| 303 | Male   | 38 | Cardia | ≤ 5.0cm | II  | ACT     | 0 | 75   | Positive | Negative |
| 304 | Male   | 55 | Cardia | > 5.0cm | III | ACT     | 1 | 23   | Negative | Negative |
| 305 | Male   | 62 | Mixed  | ≤ 5.0cm | III | No ACT  | 1 | 53   | Positive | Positive |
| 306 | Male   | 62 | Body   | ≤ 5.0cm | II  | ACT     | 0 | 72   | Negative | Negative |
| 307 | Female | 37 | Antrum | ≤ 5.0cm | III | Unknown | 0 | 72   | Negative | Positive |
| 308 | Male   | 56 | Antrum | ≤ 5.0cm | I   | No ACT  | 0 | 73   | Positive | Positive |
| 309 | Male   | 65 | Antrum | > 5.0cm | II  | Unknown | 0 | 75   | Negative | Negative |
| 310 | Male   | 56 | Body   | > 5.0cm | III | ACT     | 1 | 8    | Positive | Negative |
| 311 | Male   | 81 | Antrum | ≤ 5.0cm | III | Unknown | 1 | 29   | Negative | Positive |
| 312 | Male   | 46 | Mixed  | > 5.0cm | IV  | No ACT  | 1 | 10   | Negative | Positive |
| 313 | Male   | 59 | Cardia | > 5.0cm | III | ACT     | 1 | 19   | Positive | Negative |
| 314 | Male   | 52 | Cardia | > 5.0cm | III | No ACT  | 0 | 73   | Positive | Positive |
| 315 | Male   | 66 | Antrum | > 5.0cm | II  | No ACT  | 0 | 43   | Negative | Positive |
| 316 | Female | 75 | Body   | ≤ 5.0cm | III | No ACT  | 1 | 73   | Negative | Positive |
| 317 | Male   | 64 | Cardia | > 5.0cm | II  | No ACT  | 1 | 50   | Negative | Positive |
| 318 | Female | 67 | Antrum | ≤ 5.0cm | II  | ACT     | 0 | 73   | Negative | Negative |
| 319 | Female | 29 | Antrum | ≤ 5.0cm | IV  | No ACT  | 1 | 8    | Positive | Negative |
| 320 | Male   | 43 | Antrum | ≤ 5.0cm | IV  | Unknown | 0 | 60   | Negative | Negative |
| 321 | Male   | 61 | Cardia | ≤ 5.0cm | I   | No ACT  | 1 | 61   | Negative | Negative |
| 322 | Male   | 67 | Cardia | ≤ 5.0cm | III | No ACT  | 1 | 36   | Negative | Positive |
| 323 | Male   | 66 | Antrum | ≤ 5.0cm | III | No ACT  | 0 | 62   | Negative | Positive |

|     |        |    |        |         |     |         |   |      |          |          |
|-----|--------|----|--------|---------|-----|---------|---|------|----------|----------|
| 324 | Male   | 49 | Antrum | > 5.0cm | III | ACT     | 0 | 60   | Negative | Negative |
| 325 | Male   | 73 | Cardia | > 5.0cm | III | No ACT  | 1 | 22   | Negative | Negative |
| 326 | Male   | 74 | Body   | > 5.0cm | III | No ACT  | 0 | 59   | Negative | Negative |
| 327 | Female | 39 | Antrum | ≤ 5.0cm | III | Unknown | 1 | 23   | Negative | Negative |
| 328 | Male   | 66 | Cardia | > 5.0cm | III | ACT     | 0 | 58   | Negative | Negative |
| 329 | Male   | 63 | Body   | ≤ 5.0cm | III | ACT     | 1 | 58.4 | Negative | Positive |
| 330 | Male   | 56 | Cardia | ≤ 5.0cm | II  | ACT     | 0 | 57   | Negative | Negative |
| 331 | Male   | 66 | Cardia | > 5.0cm | III | ACT     | 1 | 35   | Positive | Negative |
| 332 | Male   | 68 | Mixed  | > 5.0cm | IV  | No ACT  | 1 | 13   | Negative | Negative |
| 333 | Female | 68 | Body   | > 5.0cm | III | ACT     | 0 | 57   | Negative | Negative |
| 334 | Male   | 65 | Cardia | > 5.0cm | III | No ACT  | 1 | 5    | Positive | Negative |
| 335 | Female | 75 | Cardia | > 5.0cm | III | No ACT  | 1 | 11   | Positive | Negative |
| 336 | Male   | 69 | Antrum | ≤ 5.0cm | III | ACT     | 0 | 53   | Positive | Negative |
| 337 | Male   | 53 | Body   | > 5.0cm | III | No ACT  | 1 | 17   | Positive | Positive |
| 338 | Male   | 52 | Body   | > 5.0cm | III | ACT     | 0 | 57   | Negative | Negative |
| 339 | Male   | 67 | Body   | ≤ 5.0cm | III | Unknown | 1 | 26   | Negative | Positive |
| 340 | Male   | 50 | Body   | ≤ 5.0cm | IV  | Unknown | 1 | 6    | Positive | Positive |
| 341 | Male   | 53 | Antrum | > 5.0cm | III | ACT     | 0 | 56   | Negative | Positive |
| 342 | Male   | 69 | Cardia | > 5.0cm | III | No ACT  | 1 | 28   | Positive | Positive |
| 343 | Male   | 54 | Body   | > 5.0cm | III | Unknown | 1 | 21   | Positive | Negative |
| 344 | Male   | 70 | Body   | > 5.0cm | II  | No ACT  | 0 | 57   | Positive | Negative |
| 345 | Male   | 60 | Cardia | > 5.0cm | III | ACT     | 0 | 53   | Positive | Negative |
| 346 | Male   | 50 | Body   | > 5.0cm | III | ACT     | 1 | 21   | Positive | Negative |
| 347 | Female | 50 | Antrum | ≤ 5.0cm | II  | ACT     | 0 | 56   | Positive | Positive |
| 348 | Male   | 66 | Cardia | ≤ 5.0cm | III | Unknown | 0 | 57   | Positive | Negative |
| 349 | Male   | 66 | Cardia | > 5.0cm | II  | ACT     | 0 | 57   | Positive | Positive |
| 350 | Female | 80 | Antrum | ≤ 5.0cm | II  | ACT     | 1 | 44   | Negative | Negative |
| 351 | Female | 71 | Antrum | ≤ 5.0cm | III | No ACT  | 1 | 54   | Negative | Negative |
| 352 | Male   | 50 | Antrum | ≤ 5.0cm | III | No ACT  | 0 | 54   | Negative | Negative |
| 353 | Male   | 55 | Body   | Unknown | II  | No ACT  | 0 | 56   | Negative | Positive |
| 354 | Male   | 63 | Mixed  | > 5.0cm | III | ACT     | 1 | 27   | Positive | Negative |
| 355 | Male   | 46 | Cardia | ≤ 5.0cm | I   | No ACT  | 0 | 56   | Negative | Positive |
| 356 | Female | 64 | Antrum | ≤ 5.0cm | III | No ACT  | 1 | 6    | Negative | Negative |
| 357 | Female | 28 | Antrum | > 5.0cm | IV  | No ACT  | 1 | 28   | Negative | Positive |
| 358 | Male   | 42 | Cardia | ≤ 5.0cm | III | No ACT  | 0 | 56   | Positive | Negative |
| 359 | Male   | 66 | Mixed  | > 5.0cm | III | ACT     | 0 | 55   | Positive | Negative |
| 360 | Male   | 83 | Cardia | > 5.0cm | III | ACT     | 1 | 19   | Negative | Negative |
| 361 | Male   | 79 | Antrum | > 5.0cm | III | No ACT  | 0 | 53   | Positive | Negative |
| 362 | Male   | 49 | Cardia | ≤ 5.0cm | III | No ACT  | 1 | 16   | Positive | Positive |
| 363 | Male   | 47 | Body   | ≤ 5.0cm | III | Unknown | 0 | 55   | Positive | Negative |
| 364 | Male   | 72 | Mixed  | ≤ 5.0cm | II  | ACT     | 1 | 56   | Positive | Positive |
| 365 | Male   | 70 | Cardia | ≤ 5.0cm | III | ACT     | 1 | 55   | Negative | Positive |

**Table S9. Characteristics of 365 patients with gastric cancer between RASAL2 negative and positive expressions (Local cohort)**

| Clinicopathological features | Total (n=365) | RASAL2 expression |             | p value |
|------------------------------|---------------|-------------------|-------------|---------|
|                              |               | Negative          | Positive    |         |
| Age at diagnosis             | 365           | 61.8 ± 12.5       | 62.3 ± 11.1 |         |
| Gender                       |               |                   |             | 0.093   |
| Male                         | 270           | 109               | 161         |         |
| Female                       | 95            | 48                | 47          |         |
| Tumor location               |               |                   |             | 0.157   |
| Cardia                       | 106           | 44                | 62          |         |
| Body                         | 66            | 29                | 37          |         |
| Antrum                       | 156           | 74                | 82          |         |
| Mixed                        | 37            | 10                | 27          |         |
| Tumor size (cm)              |               |                   |             | 0.959   |
| ≤ 5.0                        | 88            | 39                | 49          |         |
| > 5.0                        | 80            | 34                | 46          |         |
| Unknown                      | 197           | 84                | 113         |         |
| AJCC stage                   |               |                   |             | 0.069   |
| I                            | 37            | 17                | 20          |         |
| II                           | 98            | 47                | 51          |         |
| III                          | 221           | 86                | 135         |         |
| IV                           | 9             | 7                 | 2           |         |
| T stage                      |               |                   |             | 0.330   |
| T1                           | 22            | 9                 | 13          |         |
| T2                           | 46            | 22                | 24          |         |
| T3                           | 136           | 65                | 71          |         |
| T4                           | 161           | 61                | 100         |         |
| N stage                      |               |                   |             | 0.709   |
| N0                           | 76            | 32                | 44          |         |
| N1                           | 62            | 30                | 32          |         |
| N2                           | 87            | 39                | 48          |         |
| N3                           | 140           | 56                | 84          |         |
| M stage                      |               |                   |             | 0.042*  |
| M0                           | 356           | 150               | 206         |         |
| M1                           | 9             | 7                 | 2           |         |



**Table S10. Characteristics of 300 patients with gastric cancer between RASAL2 low and high expressions (GSE66229)**

| Clinicopathological features | Total (n=300) | RASAL2 expression |             | p value |
|------------------------------|---------------|-------------------|-------------|---------|
|                              |               | Low               | High        |         |
| Age at diagnosis             | 300           | 62.7 ± 11.5       | 61.6 ± 11.3 |         |
| Gender                       |               |                   |             | 0.540   |
| Male                         | 199           | 62                | 137         |         |
| Female                       | 101           | 35                | 66          |         |
| Tumor site                   |               |                   |             | 0.723   |
| Cardia                       | 30            | 8                 | 22          |         |
| Body                         | 107           | 32                | 75          |         |
| Antrum                       | 150           | 52                | 98          |         |
| Mixed                        | 13            | 5                 | 8           |         |
| Lauren type                  |               |                   |             | 0.730   |
| Intestinal                   | 146           | 44                | 102         |         |
| Diffuse                      | 134           | 46                | 88          |         |
| Mixed                        | 20            | 7                 | 13          |         |
| AJCC stage                   |               |                   |             | 0.040*  |
| I                            | 31            | 17                | 14          |         |
| II                           | 105           | 33                | 72          |         |
| III                          | 137           | 40                | 97          |         |
| IV                           | 27            | 7                 | 20          |         |
| T stage                      |               |                   |             | 0.200   |
| T2                           | 188           | 67                | 121         |         |
| T3                           | 91            | 26                | 65          |         |
| T4                           | 21            | 4                 | 17          |         |
| N stage                      |               |                   |             | 0.004*  |
| N0                           | 38            | 18                | 20          |         |
| N1                           | 56            | 16                | 40          |         |
| N2                           | 75            | 31                | 44          |         |
| N3a                          | 79            | 25                | 54          |         |
| N3b                          | 52            | 7                 | 45          |         |
| M stage                      |               |                   |             | 0.456   |
| M0                           | 273           | 90                | 183         |         |
| M1                           | 27            | 7                 | 20          |         |

**Table S11. Univariate and multivariate cox regression analysis of clinicopathologic factors with overall survival in GC patients (Local cohort)**

| Characteristic    | Univariate |              |          | Multivariate |              |          |
|-------------------|------------|--------------|----------|--------------|--------------|----------|
|                   | HR         | 95% CI       | <i>P</i> | HR           | 95% CI       | <i>P</i> |
| Age at diagnosis  | 1.017      | 1.004-1.029  | 0.010*   | 1.023        | 1.010-1.037  | 0.001*   |
| Gender            |            |              | 0.689    |              |              |          |
| Female            |            | Reference    |          |              |              |          |
| Male              | 0.937      | 0.681-1.288  |          |              |              |          |
| Tumor location    |            |              | 0.002*   |              |              | 0.010*   |
| Cardia            |            | Reference    |          |              | Reference    |          |
| Body              | 1.218      | 0.816-1.819  |          | 1.277        | 0.852-1.915  |          |
| Antrum            | 0.683      | 0.484-0.963  |          | 0.690        | 0.488-0.975  |          |
| Mixed             | 1.447      | 0.928-2.255  |          | 1.112        | 0.709-1.743  |          |
| Tumor size        |            |              | 0.100    |              |              |          |
| ≤ 5.0             |            | Reference    |          |              |              |          |
| > 5.0             | 1.525      | 1.014-2.293  |          |              |              |          |
| Unknown           | 1.130      | 0.794-1.609  |          |              |              |          |
| AJCC stage        |            |              | <0.001*  |              |              | <0.001*  |
| I                 |            | Reference    |          |              | Reference    |          |
| II                | 1.574      | 0.755-3.283  |          | 1.513        | 0.724-3.163  |          |
| III               | 4.627      | 2.351-9.104  |          | 4.373        | 2.212-8.644  |          |
| IV                | 12.516     | 4.785-32.739 |          | 26.090       | 9.495-71.688 |          |
| RASAL2 expression |            |              | <0.001*  |              |              | <0.001*  |
| Negative          |            | Reference    |          |              | Reference    |          |
| Positive          | 1.761      | 1.312-2.363  |          | 1.753        | 1.288-2.385  |          |

**Table S12. Univariate and multivariate cox regression analysis of clinicopathologic factors with overall survival in GC patients (GSE66229)**

| Characteristic    | Univariate |              |          | Multivariate |              |          |
|-------------------|------------|--------------|----------|--------------|--------------|----------|
|                   | HR         | 95% CI       | <i>P</i> | HR           | 95% CI       | <i>P</i> |
| Age at diagnosis  | 1.010      | 0.995-1.026  | 0.181    |              |              |          |
| Gender            |            |              | 0.559    |              |              |          |
| Female            |            | Reference    |          |              |              |          |
| Male              | 0.905      | 0.647-1.265  |          |              |              |          |
| Tumor site        |            |              | 0.222    |              |              |          |
| Cardia            |            | Reference    |          |              |              |          |
| Body              | 0.641      | 0.383-1.073  |          |              |              |          |
| Antrum            | 0.605      | 0.368-0.994  |          |              |              |          |
| Mixed             | 0.826      | 0.364-1.877  |          |              |              |          |
| Lauren type       |            |              | 0.003*   |              |              | 0.059    |
| Intestinal        |            | Reference    |          |              | Reference    |          |
| Diffuse           | 1.669      | 1.192-2.338  |          | 1.271        | 0.894-1.807  |          |
| Mixed             | 2.153      | 1.202-3.855  |          | 2.072        | 1.149-3.737  |          |
| AJCC stage        |            |              | <0.001*  |              |              | <0.001*  |
| I                 |            | Reference    |          |              | Reference    |          |
| II                | 2.306      | 0.906-5.865  |          | 2.027        | 0.792-5.183  |          |
| III               | 5.263      | 2.133-12.989 |          | 4.345        | 1.741-10.844 |          |
| IV                | 13.187     | 5.027-34.592 |          | 11.305       | 4.214-30.330 |          |
| RASAL2 expression |            |              | 0.003*   |              |              | 0.004*   |
| Low               |            | Reference    |          |              | Reference    |          |
| High              | 1.754      | 1.211-2.541  |          | 1.727        | 1.187-2.512  |          |

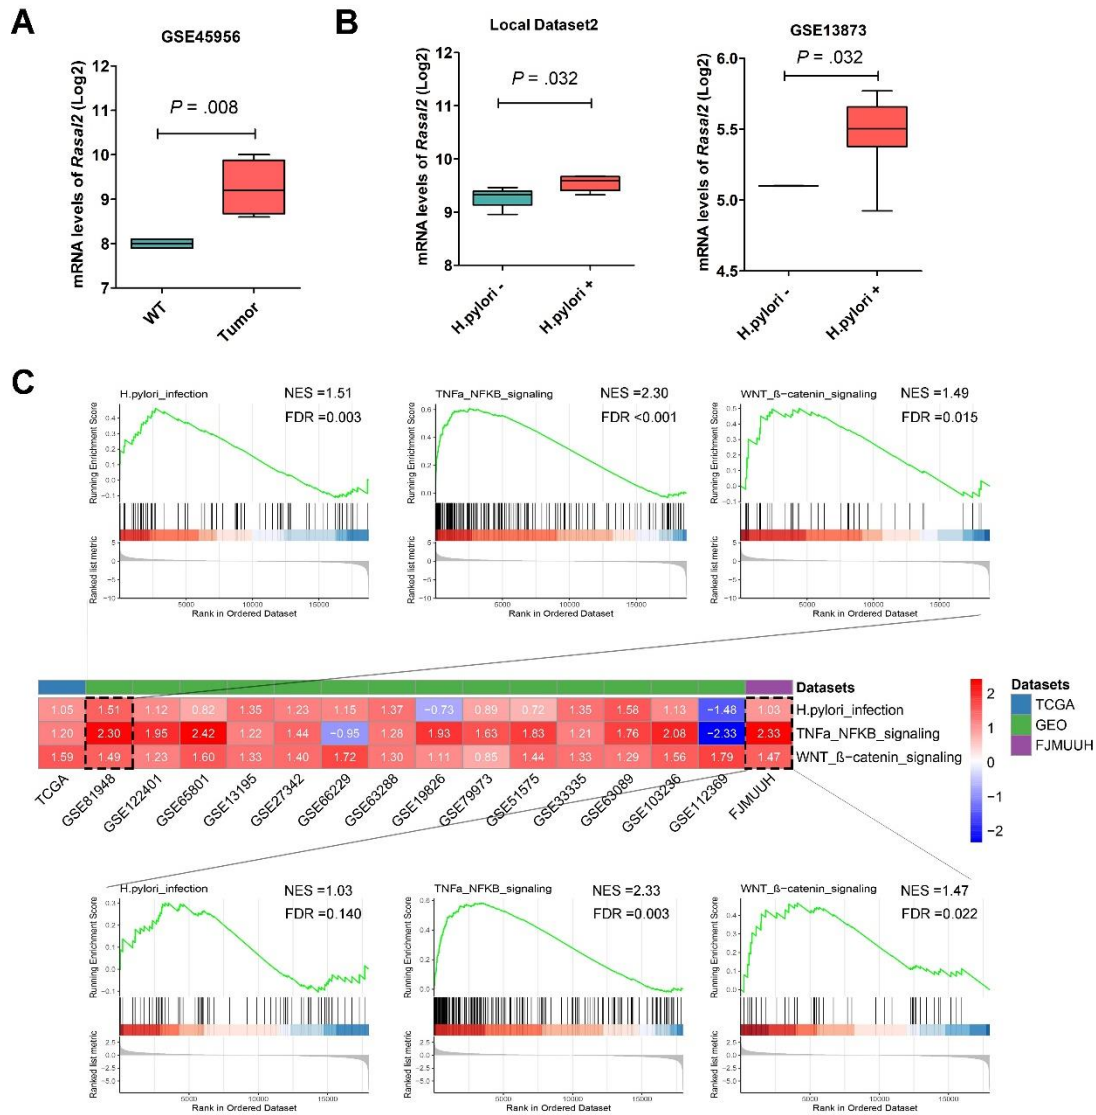

### Supplementary Figure 1. *H. pylori* infection upregulates RASAL2 mRNA expression

(A) *Rasal2* mRNA expression in mouse primary GC models from a GEO dataset (GSE45956). (B) *Rasal2* mRNA expression level in mouse samples with and without *H. pylori* infection in our local cohort (TFF1-knockout mouse model) and in GSE13873 cohort (*H. pylori* infection of C57BL/6 mouse model). (C) Gene set enrichment analysis (GSEA) was employed for *H. pylori* infection and its downstream signaling (downloaded from MSigDB), using the differential expressed genes (DEGs) identified by the *RASAL2*-high group vs. *RASAL2*-low group in the TCGA, GEO and local cohorts. NES: normalization enrichment score, FDR: false discovery rate.

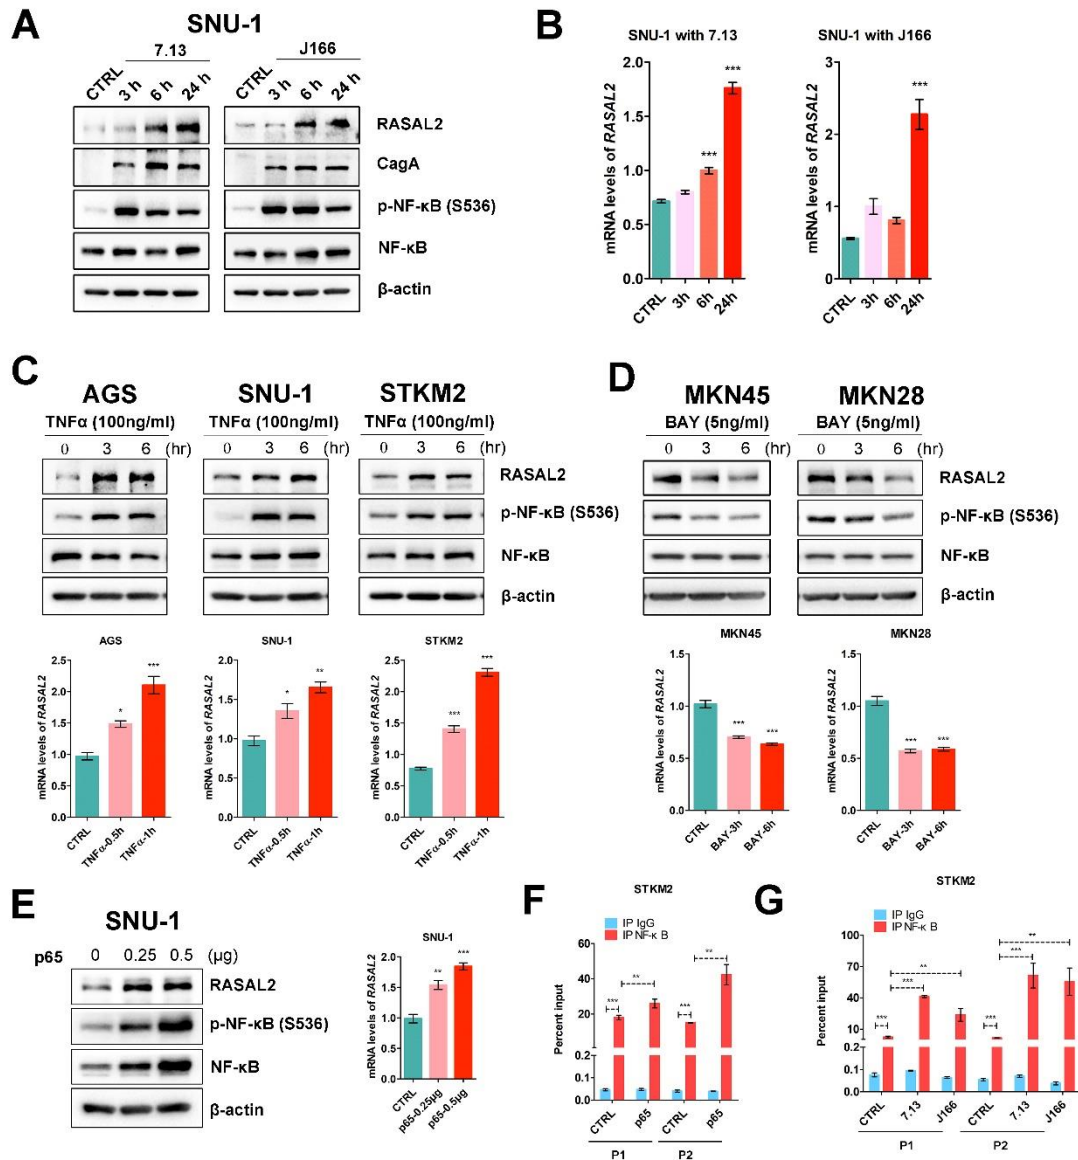

**Supplementary Figure 2. *H. pylori* infection upregulates RASAL2 mRNA expression via induction of NF-κB**

(A and B) Western blots (A) and qRT-PCR analyses (B) of RASAL2 expression in SNU-1 cells following *H. pylori* infection. The infected cells were harvested at indicated time course. \*\*\* $P < .001$ . (C-E) Western blots and qRT-PCR analysis of RASAL2 and/or NF-κB in the GC cell lines with TNFα (C), BAY 11-7082 (D), or transient overexpression of p65 (NF-κB) (E); \* $P < .05$ , \*\* $P < .01$ , \*\*\* $P < .001$ . (F and G) Chromatin immunoprecipitation (ChIP) assays were performed in STKM2 cells with p65 transient expression (H) or with *H. pylori* infections (I). \*\* $P < .01$ , \*\*\* $P < .001$ .

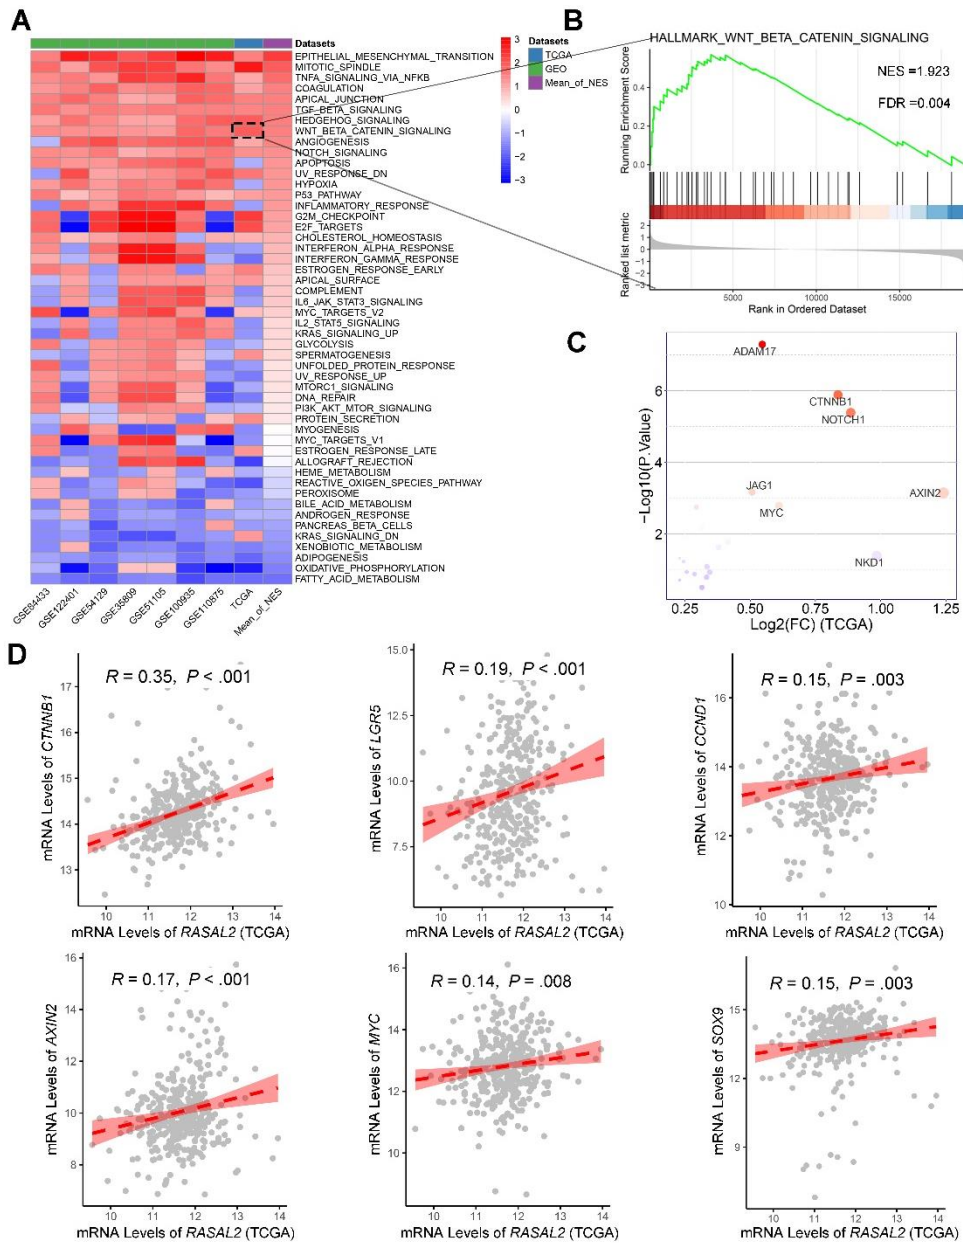

**Supplementary Figure 3. RASAL2-associated signaling pathways and genes in gastric cancer**

(A) Gene set enrichment analysis (GSEA) was performed by high *RASAL2* expression group, compared with low *RASAL2* expression group in TCGA and GEO cohorts. Fifty hallmark gene sets were downloaded from Gene Set Enrichment Analysis (<https://www.gsea-msigdb.org/>). (B and C) Wnt/ $\beta$ -catenin gene set (B), including *CTNNB1* and its targets *MYC* and *AXIN2* (C), was significantly enriched by *RASAL2* expression in the TCGA cohort. NES: normalization enrichment score, FDR: false discovery rate. (D) Pearson's correlation analysis between *RASAL2* and  $\beta$ -catenin signaling genes was examined in the TCGA cohort.

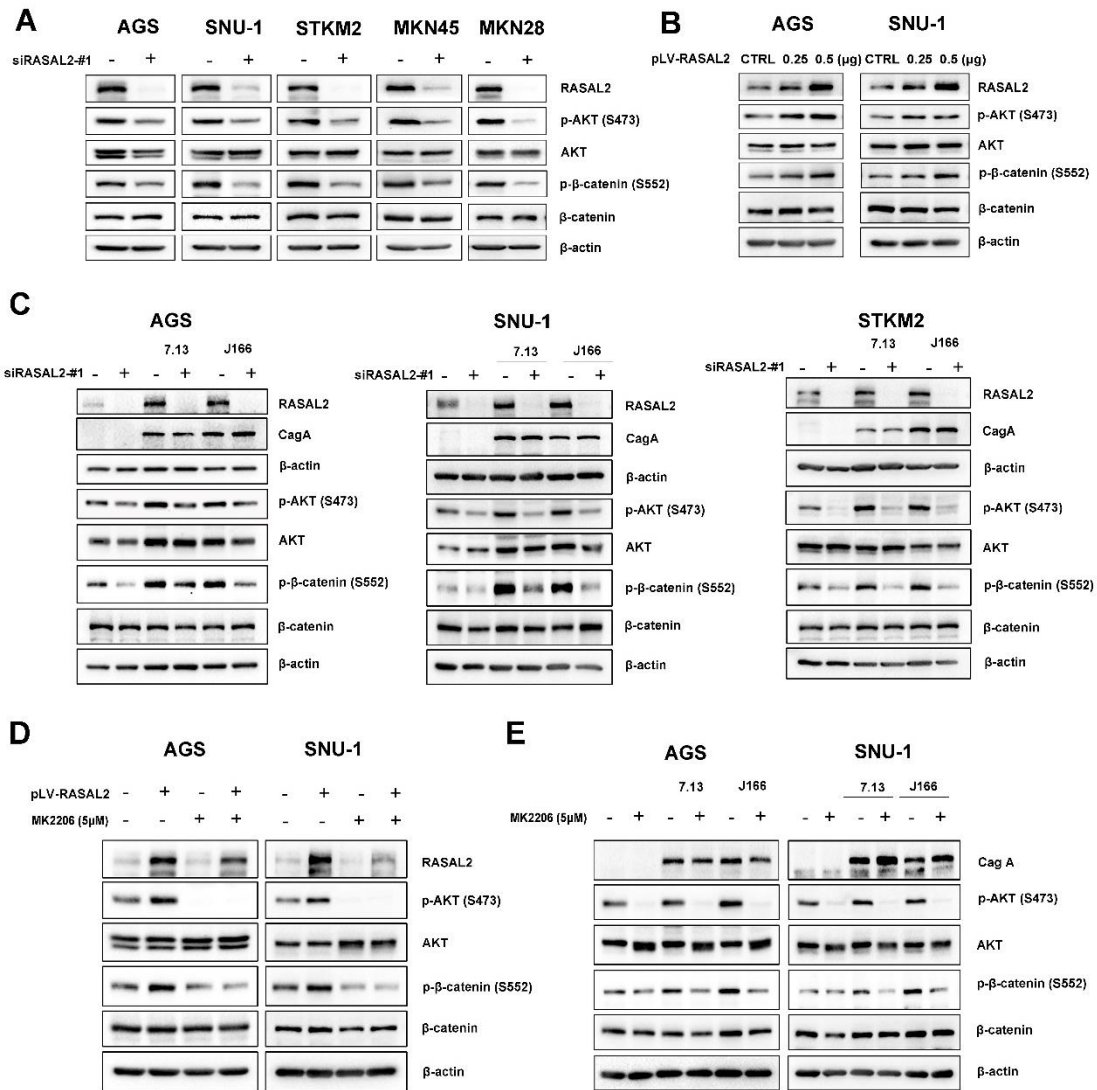

**Supplementary Figure 4. *H. pylori* infection induces β-catenin activation in a RASAL2/AKT-dependent manner**

Western blots of RASAL2, total AKT, phosphorylated AKT (Ser473), β-catenin, phosphorylated β-catenin (Ser552), β-actin and CagA (*H. pylori* infection biomarker) were performed in GC cell lines under different conditions or treatments. (A) Five GC cell lines were transfected with RASAL2 siRNA or control siRNA. (B) The GC cells were transfected with indicated amounts of pLV-RASAL2 expression plasmid or control plasmid. (C) The GC cells with/without RASAL2 knockdown (siRASAL2#1) were infected with the two *H. pylori* strains (7.13 and J166). (D) The GC cells with pLV-RASAL2 expression plasmid or control plasmid were treated with AKT inhibitor (MK2206, 5μM). (E) The GC cells were pretreated by MK2206 for 1h and then were infected by *H. pylori* (7.13 and J166) for 6h.

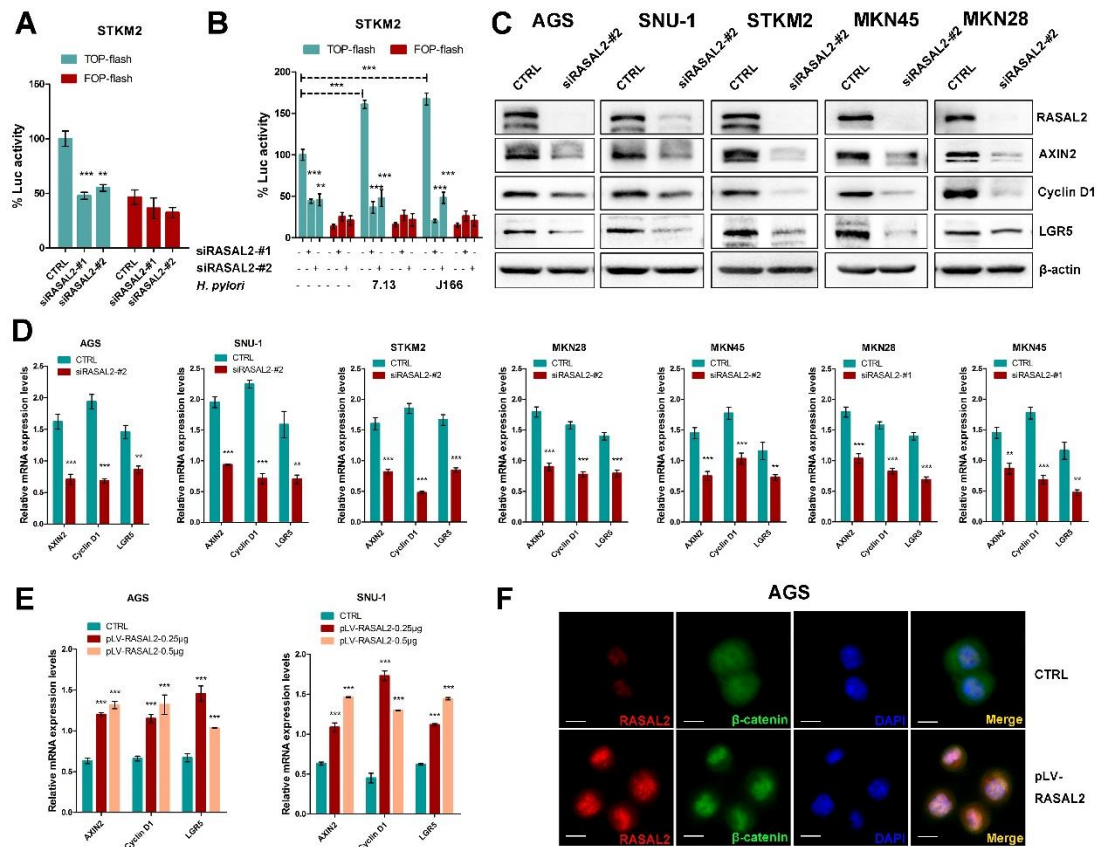

### Supplementary Figure 5. *H. pylori* infection promotes $\beta$ -catenin transcriptional activity via induction of RASAL2

(A and B)  $\beta$ -catenin luciferase reporter assay was performed in STKM2 cells with RASAL2 silencing or *H. pylori* infections. \*\* $P < .01$ , \*\*\* $P < .001$ . (C-E) Western blots (C) and qRT-PCR analysis (D and E) of  $\beta$ -catenin downstream targets in GC cell lines with RASAL2 depletion by siRNA (#1) and siRNA (#2) or with pLV-RASAL2 expression plasmid. Scramble siRNA worked as control. \*\* $P < .01$ , \*\*\* $P < .001$ . (F) Representative images (scale bars, 20 $\mu$ m) of immunofluorescence (IF) assay of RASAL2 (red) and  $\beta$ -catenin (green) in AGS cells with RASAL2 overexpression. Empty expression vector served as control.



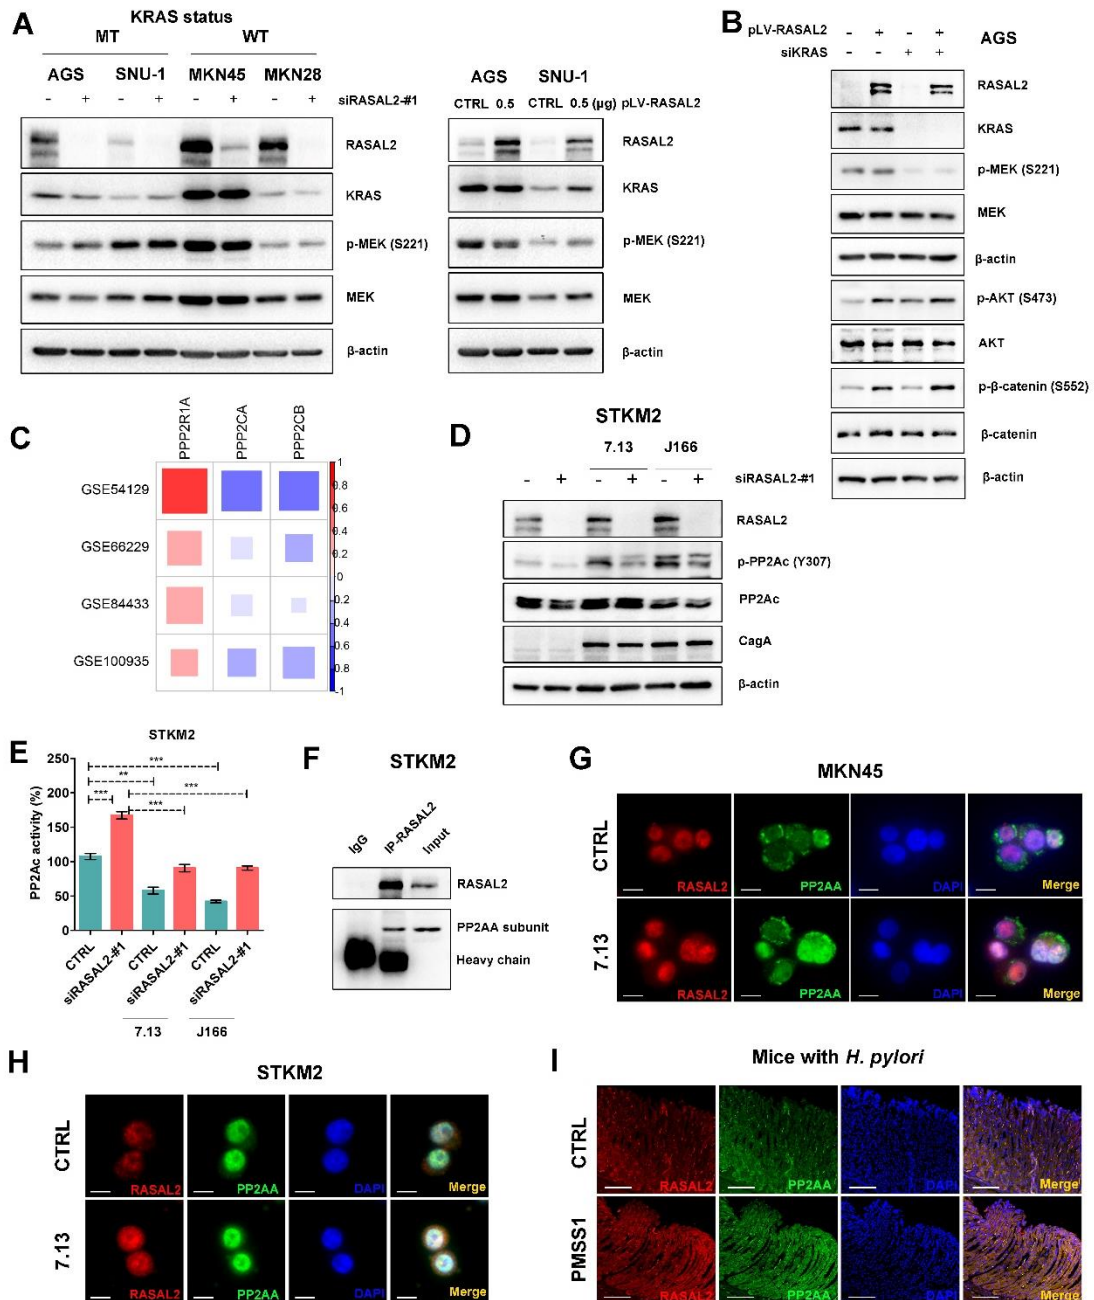

### Supplementary Figure 6. RASAL2 regulates AKT phosphorylation through protein phosphatase 2A (PP2A)

(A) Western blots of KRAS signaling in KRAS mutation (MT) and wild type (WT) GC cell lines following RASAL2 depletion or overexpression. (B) Western blots of KRAS signaling and RASAL2/AKT/β-catenin signaling axis in AGS cells following RASAL2 overexpression or KRAS depletion. (C) Pearson's correlation heatmap was performed between RASAL2 expression and genes encoding PP2A subunits (PPP2R1A, PPP2CA, PPP2CB) expression in four GEO datasets. (D) Western blots for RASAL2, p-PP2Ac

(Y307), PP2Ac, and CagA were employed in STKM2 cells with RASAL2 depletion following by *H. pylori* infection. (E) PP2A Phosphatase immunoprecipitation assays were carried out in STKM2 cells with RASAL2 depletion following by *H. pylori* infection. The active PP2A form, PP2Ac, was specifically pulled down from whole-cell lysates according to the manufacturer's instructions.  $**P < .01$ ,  $***P < .001$ . (F) Immunoprecipitation (IP) assay using antibody against RASAL2 in STKM2 cells. IgG worked as a negative control. Western blots of RASAL2 and PP2AA were performed. (G-I) Immunofluorescence (IF) staining for RASAL2 and PP2AA was performed in GC cell lines (G and H, scale bars, 10 $\mu$ m) and mouse stomach tissues (I, scale bars, 100 $\mu$ m) with *H. pylori* infection.

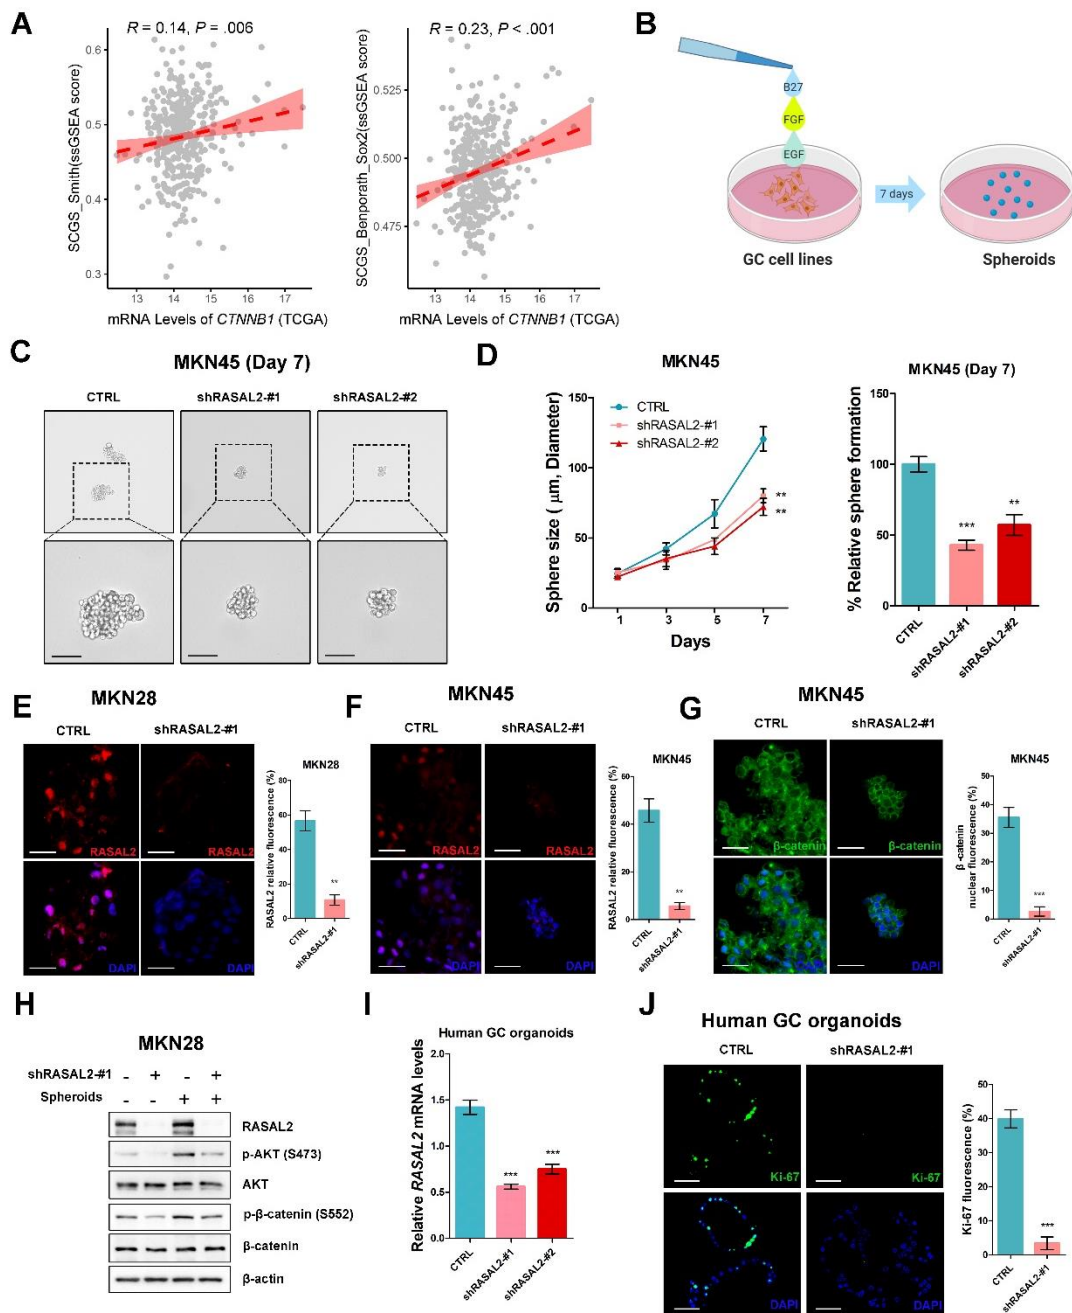

### Supplementary Figure 7. RASAL2 depletion counteracts gastric cancer cell expansion

(A) Pearson's correlation assays were performed between *CTNNB1* and single-sample gene set enrichment analysis (ssGSEA) scores for two verified stem cell signatures in the TCGA cohort. (B) The schematic diagram for spheroid models derived from MKN28 and MKN45 cells using a conditional medium. (C) Spheroids (scale bars, 100 $\mu\text{m}$ ) derived from MKN45 cells with stable knockdown of RASAL2 (shRASAL2-#1 and -#2) displayed significant smaller spheroids as compared to the scramble shRNA cells (CTRL). (D) The quantification of sphere size and number was expressed as the mean

$\pm$  SD of 3 independent fields.  $**P < .01$ ,  $***P < .001$ . (E-G) Representative immunofluorescent images (scale bars, 25 $\mu$ m) of RASAL2(red) or  $\beta$ -catenin (green) in spheroids; nuclei were stained with DAPI (blue). The quantification of RASAL2 or nuclear  $\beta$ -catenin percentage is shown as the mean  $\pm$  SD of 3 independent fields.  $**P < .01$ ,  $***P < .001$ . (H) Western blots for RASAL2/AKT/ $\beta$ -catenin signaling axis were performed in spheroids derived from MKN28. (I) qRT-PCR analysis of RASAL2 in GC organoids with RASAL2 depletion (shRASAL2-#1 and #2). Scramble shRNA worked as control (CTRL).  $***P < .001$ . (J) Representative immunofluorescent images (scale bars, 50 $\mu$ m) of Ki-67 staining in organoids. The quantification of Ki-67 positive cells is shown as the mean  $\pm$  SD of 3 independent fields,  $***P < .001$ .

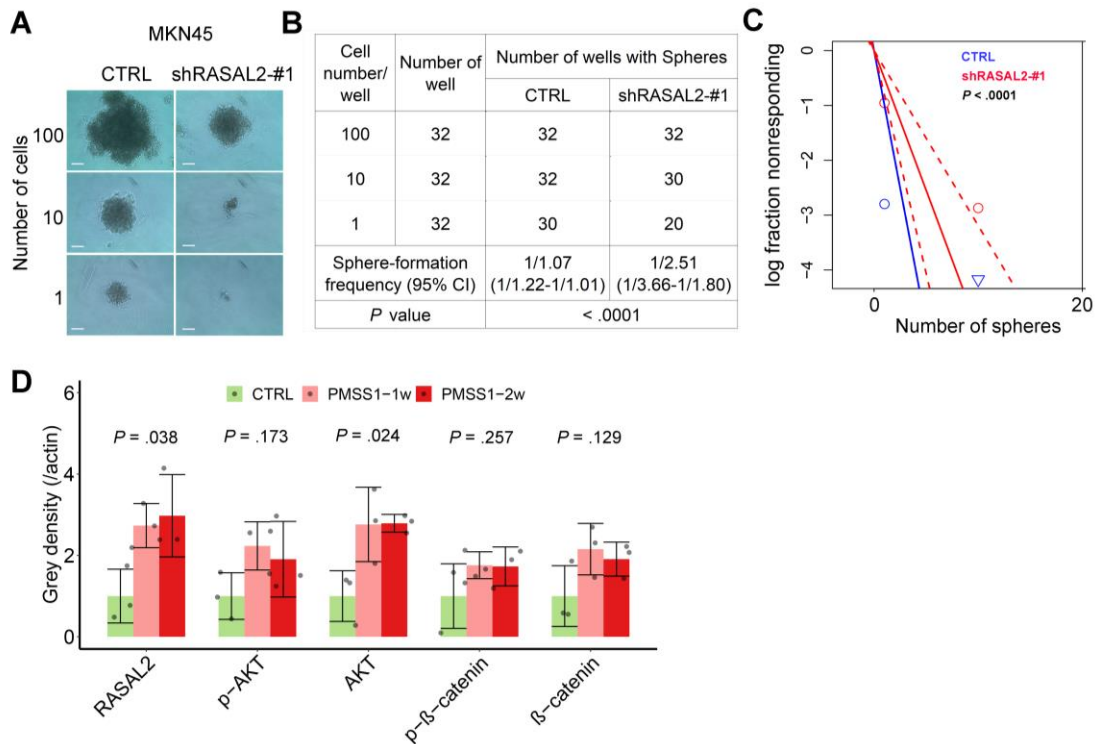

**Supplementary Figure 8. RASAL2 depletion counteracts gastric cancer cell expansion.**

(A-C) MKN45 cells with/without RASAL2 knockdown were series diluted and planted into the U-bottom 96-well plates. (A) shows spheroids (scale bars, 200 $\mu$ m) formation at day 21. (B and C) displays frequency of spheroid formation and the probability estimates calculated with Extreme Limiting Dilution Analysis (ELDA) software (<http://bioinf.wehi.edu.au/software/elda/>). A significant difference in spheroid formation capacity was observed between the control and shRASAL2 groups. (D) Densitometry analysis for western blots of Figure 6G.

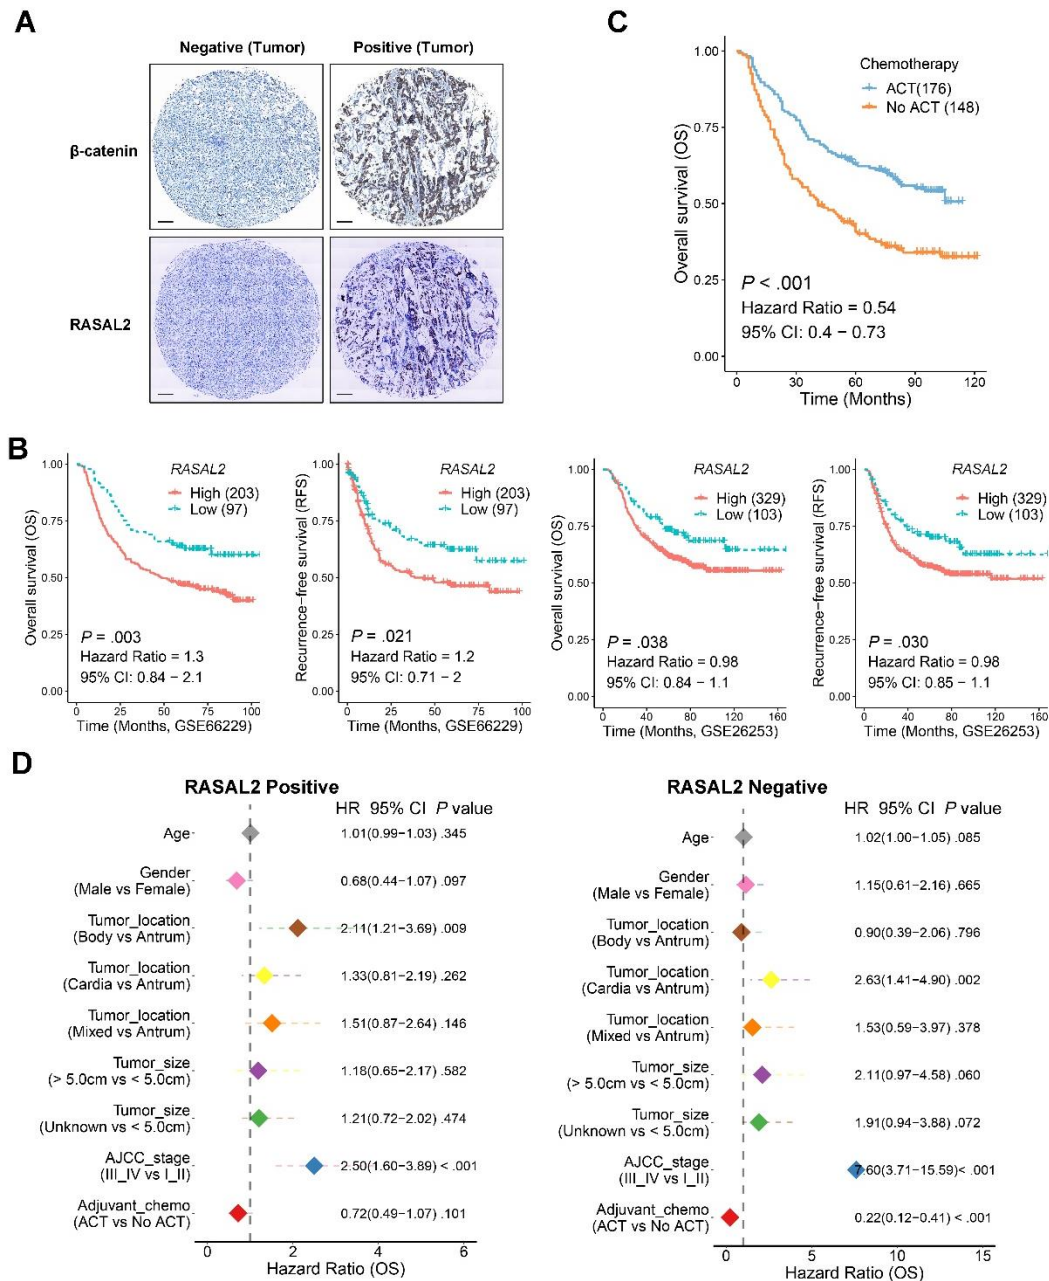

**Supplementary Figure 9. Elevated expression of RASAL2 and  $\beta$ -catenin predicted chemoresistance and poor prognosis in gastric cancer** (A) Representative immunohistochemistry staining (scale bars, 100 $\mu$ m) of RASAL2 and  $\beta$ -catenin in the serial slides of tumor tissues. (B) Kaplan-Meier survival analysis for the overall survival of the cohorts with different RASAL2 mRNA expression levels in GSE66229 and GSE26253 datasets. (C) Kaplan-Meier survival analysis for overall survival of cohorts with and without adjuvant chemotherapy (ACT) in the local dataset. (D) A hazard ratio of the patients with ACT, compared with the patients without ACT, was adjusted to other clinicopathological features using Cox regression model.

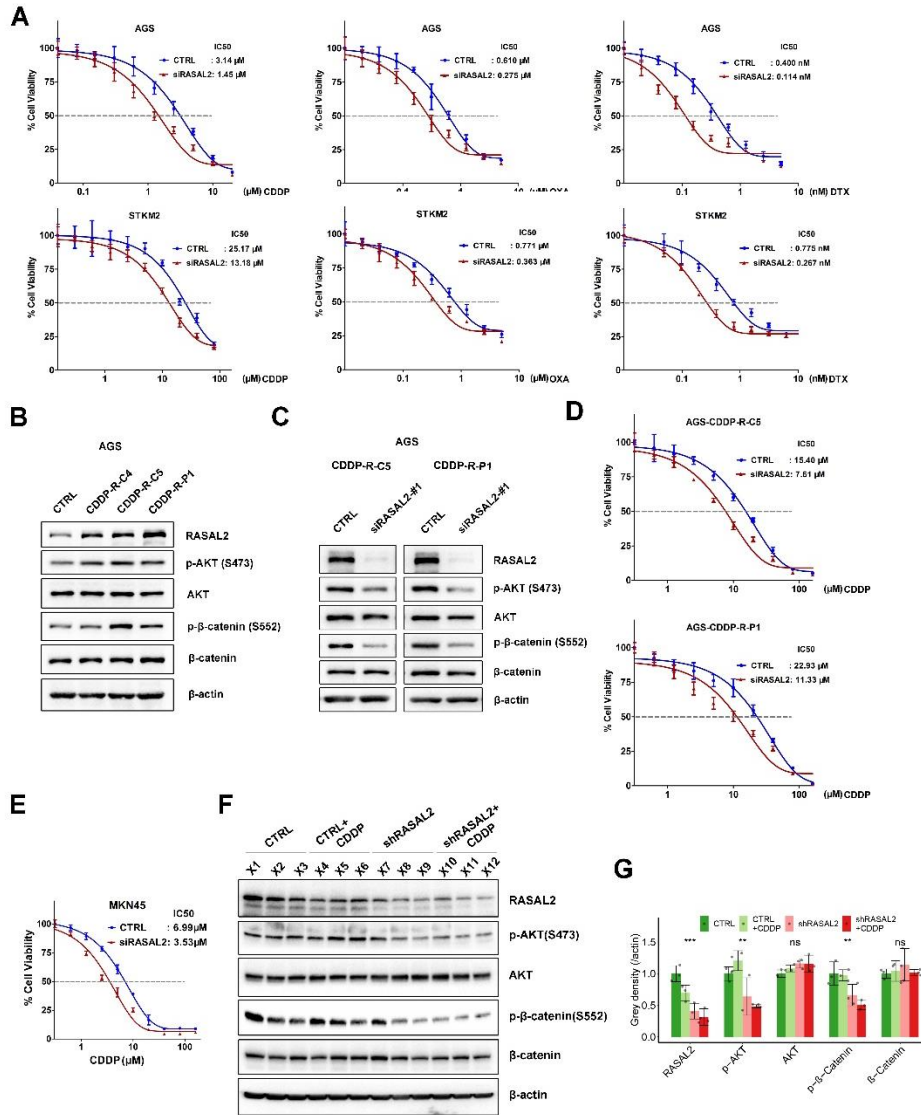

**Supplementary Figure 10. RASAL2 depletion sensitized GC cells to chemotherapy and overcame chemoresistance** (A) ATP-Glo assays showed the IC<sub>50</sub> curves of cisplatin (CDDP), oxaliplatin (OXA), and docetaxel (DTX) in AGS and STKM2 cell lines with RASAL2 depletion (siRASAL2-#1). (B and C) Western blots of RASAL2/AKT/β-catenin signaling axis in parental and CDDP-resistant AGS cells (B), and in CDDP-resistant AGS cells with RASAL2 depletion (siRASAL2-#1) (C). (D) IC<sub>50</sub> curves of CDDP in CDDP resistant AGS cells with RASAL2 silencing (siRASAL2-#1). Scramble siRNA worked as control. (E) ATP-Glo assays showed the IC<sub>50</sub> curves of cisplatin (CDDP) in MKN45 cells with RASAL2 depletion (siRASAL2-#1). (F) Western blots for RASAL2 and its downstream signaling in xenograft tumors with/without RASAL2 knockdown. (G) Densitometry analysis for western blots of panel F. \*\**P* < .01, \*\*\**P* < .001.
